# Supplementary material for: Enhancer Remodeling during Adaptive Bypass to MEK Inhibition Is Attenuated by Pharmacologic Targeting of the P-TEFb Complex
Source: Oxford University Press journal article supplement (doi:10.1158/2159-8290.cd-16-0653), 2017-01-21
Supplement: 21598290cd160653-sup-167758_3_supp_3815458_vjvvsm.xlsx [file 21598290cd160653-sup-167758_3_supp_3815458_vjvvsm.xlsx]

## Sheet: Sheet1
BL cell line induced 0.05 FDR	BL Log2 mean fold change	BL adj p value	CL cell line induced 0.05 FDR	CL Log2 mean fold change	CL adj p value
ROS1	1.56909	2.09e-10	CAMK2A	2.91629	1.77e-09			BL unique
EPHA5	1.28827	0.000395396	ERBB4	2.74836	1.74e-21			CL unique
MAP3K8	1.28453	3.17e-09	NPR1	2.65058	2.42e-29			common
DAPK1	1.2414	1.09e-08	ROS1	2.4502	3.1e-24		*	patient overlap
KSR1	1.1086	1.19e-07	IP6K3	2.30425	5.6e-13
FRK*	1.10433	1.56e-07	DCLK1	2.15977	4.89e-38
CSF1R	1.08867	0.000189391	CDK18	1.96708	9e-08
TRPM6	1.08343	0.00104744	PDGFRB	1.95695	8.21e-13
ALPK2	1.08049	0.00253755	CDC42BPG*	1.94798	1.47e-06
LRRK2	1.07723	9.3e-05	DDR1*	1.92932	3.14e-09
NRK	1.06987	0.000267054	MYLK3	1.86762	0.000506404
ULK1	1.00898	1.85e-09	LMTK3	1.83672	6.35e-06
DAPK2	0.995467	0.000355819	ULK1	1.75773	3.16e-30
FGFR2	0.916651	1.35e-09	MAP3K8	1.72774	1.68e-14
MAPK10	0.915755	0.0140379	FRK*	1.709	1.23e-06
PINK1	0.877154	2.38e-35	ALPK3	1.67311	0.000413764
MYLK	0.851554	0.0109327	SPEG	1.56458	1e-09
ALPK1	0.844363	9.61e-05	PRKG1	1.5423	1.45e-05
DCLK2	0.833271	0.00435604	EPHA5	1.47132	8.07e-18
MAP2K6	0.811676	0.0112157	CDKL2	1.44127	0.0169418
PHKG1	0.792305	0.00241829	TNK1	1.43175	6.29e-12
IRAK3	0.706875	0.0131487	FGR	1.43124	0.0287775
RNASEL	0.702543	1e-10	PKDCC	1.41908	6.23e-12
ALPK3	0.692895	0.0180746	STK38L	1.40221	1.03e-28
MAPK11	0.688048	6.63e-07	ERBB3	1.38442	6.63e-05
CDKL5*	0.673596	0.000182041	PTK2B	1.38191	5.25e-17
CDKL2	0.671726	0.039925	DCLK2	1.37628	1.06e-13
NRBP2	0.669373	3.5e-05	PRKG2	1.34836	0.00138662
TESK2	0.66666	0.00113113	AATK	1.32042	3.05e-05
ACVR1C	0.653337	0.00346017	MAP2K6	1.31481	1.47e-06
ADCK4	0.646814	1.01e-07	DAPK1	1.30788	0.00827231
ROR2	0.623771	0.0252311	MAPK10	1.2757	0.00697303
BMPR2	0.598321	5.76e-05	PINK1	1.258	5.66e-20
MYO3A	0.591922	0.0286222	OBSCN	1.23807	3.43e-06
STK38	0.568264	4.82e-07	RNASEL	1.19605	1.36e-11
CDC42BPG*	0.565115	2.09e-12	STK32A	1.17884	2.96e-05
SPEG	0.565035	1.23e-06	FN3K	1.16936	4.52e-05
CDK19*	0.559526	2.88e-05	DMPK	1.12872	9.1e-07
EPHB6	0.544676	0.0456107	ALPK2	1.11184	0.00514948
DDR1*	0.544012	1.89e-07	KALRN	1.06753	0.00971209
EPHA4	0.54324	0.0384475	NRBP2	1.06419	2.53e-10
PRKD1	0.526257	0.00134267	FGFR3	1.04792	1.75e-08
PTK6	0.516222	0.000123987	TRIB1	0.981236	3.93e-31
FGFR3	0.504395	0.0141518	CDKL5*	0.976212	9.32e-08
ERBB2*	0.502428	0.00102284	CHKB	0.943554	0.00748764
IKBKE	0.50116	6.36e-05	STK38	0.903062	1.16e-08
MAP3K6	0.466358	0.000126429	ERBB2*	0.88409	1.95e-09
NEK11	0.464607	0.00426027	DAPK3	0.877306	8.95e-28
LMTK3	0.46346	0.00128435	GRK5	0.841677	1.51e-05
ADCK5	0.461415	3.73e-06	MAPK3	0.813312	7.76e-09
MARK1	0.451361	7.63e-10	MAP3K13	0.806862	0.000339989
MAPK3	0.447166	2.34e-06	MAP3K2	0.80471	1.03e-08
TNK1	0.441548	4.16e-09	DGKQ	0.79439	4.84e-19
PDK2	0.430211	0.00445931	NPR2	0.78795	0.00140996
TTN	0.429541	0.012794	FGFR4	0.782016	0.0286035
ILK	0.422132	1.24e-08	EPHA4	0.779679	1.12e-09
JAK2	0.419396	2.14e-05	AGPHD1	0.779417	0.00461525
MYLK4	0.418858	0.0364395	NEK10	0.765596	4.84e-05
JAK1	0.415004	1.19e-05	IGF1R	0.756242	2.24e-17
MINK1	0.411405	5.97e-23	TTBK2	0.751432	0.000815694
TBCK	0.410479	0.000559481	PDK2	0.743692	4.71e-05
CDK3	0.410114	0.0299937	NUAK1	0.73302	3.71e-06
CHKB	0.402219	0.043405	JAK1	0.723492	1.32e-08
ERBB3	0.4005	0.000800181	BMPR2	0.716565	1.07e-12
IPMK	0.394262	2.15e-05	ILK	0.708358	1.08e-09
PIK3CD	0.379899	6.25e-06	MAP3K12	0.706643	0.00424053
PPIP5K1	0.376791	1.4e-05	MAST3	0.705987	0.000245558
CDK18	0.373195	0.0498251	NME3	0.694221	1.4e-07
AGPHD1	0.36542	0.032179	CDK20	0.690997	4.71e-07
PRKACA	0.352884	0.00154613	DAPK2	0.690635	0.00244241
PTK2B	0.350522	0.0194426	LRRK2	0.679598	0.00935212
IRAK4	0.345626	1.25e-05	MARK4	0.675455	0.000744103
SYK	0.342466	0.00336145	ADCK1	0.665837	7.01e-05
ULK2	0.340954	0.0134173	MAPK11	0.662418	3.57e-07
ICK	0.337875	0.000245714	SGK269	0.647874	1.48e-15
STK16	0.3375	0.000970733	PRKACB	0.629779	1.93e-10
RIPK4	0.328004	0.0369506	PDK3	0.628467	0.00226768
IGF1R	0.325802	0.049772	MAST1	0.627196	0.0312278
MKNK1	0.322538	0.00535851	MAP3K10	0.620317	3.78e-11
PFKL	0.321847	0.00574008	BRSK2	0.619236	0.00676977
DAPK3	0.317973	0.00015491	NEK11	0.610753	0.000282735
EIF2AK3	0.311623	0.00101294	IP6K2	0.604582	1.09e-08
LATS2	0.310973	0.00135109	LATS2	0.598596	9.94e-05
PSKH1	0.3002	0.000103159	CDK15	0.598466	3.3e-05
PRKACB	0.29959	0.000258218	AK1	0.596793	2.88e-09
MAST1	0.299041	0.0475828	SRC	0.591932	8.69e-20
LIMK2	0.296137	0.0100953	PSKH1	0.591891	9.96e-05
GALK1	0.286415	0.0146478	GALK1	0.588879	9.51e-08
TAOK3	0.282766	0.0258573	TBCK	0.586929	2.86e-06
CAMK2G	0.282498	0.000616573	ACVR1	0.585096	5.16e-06
MAP4K2	0.280941	0.00161588	FUK	0.58112	0.00038243
HIPK3	0.280569	0.00110909	PIP4K2C	0.578448	2.57e-11
PRKCZ	0.279381	0.00707256	EPHA7	0.577128	0.00647672
TGFBR1	0.278966	0.016779	CDK5	0.566226	5.35e-07
TTBK2	0.278909	0.000469513	FYN	0.563527	0.0221015
STK38L	0.27881	0.000561417	ADCK4	0.55368	8.38e-12
CDC42BPB	0.27508	0.000161583	NEK8	0.537657	0.0414326
CDK5	0.272948	0.019454	INSR	0.529735	5.14e-05
RPS6KC1	0.27251	0.0146224	STK32C	0.526351	9.04e-05
MAPK7	0.27044	0.000227858	HIPK3	0.516028	4.89e-16
AK1	0.268178	4.16e-06	SIK3	0.505345	3.05e-10
CAMK2D	0.263281	0.000763863	TTN	0.503977	0.00189978
MARK4	0.25827	0.0203186	LRRK1	0.503734	5.58e-20
NEK1	0.254192	0.00431971	DSTYK	0.496975	5.41e-07
VRK3	0.250254	0.00346551	ADCK5	0.496199	0.000491526
RIPK1	0.243451	0.000414347	IRAK4	0.493049	1.25e-08
PIK3CA	0.235256	0.000586581	ICK	0.487214	6.01e-11
NRBP1	0.225692	3.36e-06	SGK223	0.477456	0.0196082
PAK1	0.21891	0.0261064	PIP5K1C	0.477058	0.000183631
STRADA	0.218137	0.0351719	EEF2K	0.472366	6.45e-23
EEF2K	0.20865	0.0185887	TESK1	0.462834	1.92e-07
PIK3C3	0.204571	0.0262826	ALPK1	0.451108	0.000270733
AAK1	0.190435	0.0203636	IKBKE	0.44848	0.00121409
PIP5K1C	0.182866	0.0207078	RIPK1	0.444305	1.71e-17
FER	0.182055	0.00869187	LIMK2	0.442898	0.000429784
TYK2	0.181691	0.00269715	MAPKAPK2	0.442565	0.000124415
IKBKB	0.179752	0.0191312	TNK2	0.439649	6.84e-05
RIOK3	0.179058	0.0460713	EIF2AK3	0.439113	0.0127599
SIK2	0.17387	0.000166131	CDK19*	0.428844	3e-07
FASTK	0.169723	0.0263483	RAF1	0.414367	0.0048355
PDXK	0.167219	0.00282558	PIK3C2A	0.41093	7.05e-06
SRPK2	0.161478	0.00861752	MINK1	0.407	3.95e-14
DSTYK	0.157529	0.0383272	AKT3	0.402826	1.29e-06
PI4KA	0.154467	0.00953668	RIOK3	0.400513	0.00114032
TRPM7	0.153472	0.000577167	ACVR2A	0.397341	0.00476451
MAP3K11	0.152952	0.0403695	PRKCD	0.39321	0.0104568
ATM	0.125758	0.0449466	MKNK2	0.386855	7.59e-05
CDK16	0.0983456	0.0270556	SIK2	0.386562	3.04e-07
MAPK14	0.0817443	0.0432153	MAP3K6	0.383197	1.09e-07
			TRIM24	0.382468	5e-11
			RIPK4	0.374038	0.00346293
			PI4KA	0.364475	1.86e-05
			STK19	0.363805	0.00128951
			PTK7	0.36103	0.00769778
			CSNK1D	0.354502	1.89e-09
			KSR1	0.352379	0.00223262
			PRKCI	0.341691	0.00249375
			NEK9	0.336146	0.00155174
			CDC42BPB	0.333272	4.79e-07
			GSK3B	0.333241	2.3e-06
			TAOK1	0.325829	2.35e-05
			STK36	0.325	0.00131066
			BMPR1A	0.31187	1.52e-12
			PGK1	0.303076	0.0255384
			NME4	0.298861	0.000636459
			NRBP1	0.297593	4.79e-05
			MAP4K2	0.292702	0.0130389
			NEK1	0.280454	7.01e-05
			PDXK	0.273052	0.000167519
			PPIP5K1	0.27091	0.0027412
			MAP4K3	0.269121	0.00459613
			RPS6KC1	0.267227	8.99e-07
			PFKL	0.262402	0.00535945
			SRPK2	0.261045	0.00276359
			ZAK	0.260808	5.05e-07
			HK1	0.253012	0.00271815
			MAP2K2	0.252939	0.000384494
			SCYL3	0.249464	0.0434827
			PRKCA	0.245081	0.0328362
			AAK1	0.243669	0.0277298
			MKNK1	0.23885	0.00230449
			NME7	0.235912	0.00416136
			FASTK	0.234817	1.1e-05
			PIK3C3	0.232625	0.0134593
			PIK3CA	0.23013	0.0128089
			SCYL2	0.221244	7.32e-06
			STK25	0.22005	1.18e-06
			TRIO	0.218759	0.0417864
			CDK9	0.203994	0.00294697
			PIKFYVE	0.203437	0.0209492
			EIF2AK4	0.200663	1.57e-06
			BRD2	0.19435	0.000245378
			PRKD3	0.189802	6.83e-05
			PRKD1	0.181788	0.0230811
			TAOK2	0.170244	5.58e-06
			SGK3	0.167146	0.0176093
			TRPM7	0.164143	0.0347
			CAMKK2	0.148271	0.0130884
			STRADA	0.137954	0.0265861
