# Supplementary material for: Enhancer Remodeling during Adaptive Bypass to MEK Inhibition Is Attenuated by Pharmacologic Targeting of the P-TEFb Complex
Source: Oxford University Press journal article supplement (doi:10.1158/2159-8290.cd-16-0653), 2017-01-21
Supplement: 21598290cd160653-sup-167758_3_supp_3815473_5j5vtj.xlsx [file 21598290cd160653-sup-167758_3_supp_3815473_5j5vtj.xlsx]

## Sheet: JON_PROJ01_report_ALL
Peak	Peaksize	Classification	Classification gene	H3K4me1 100 nM trametinib	H3K4me1 DMSO	BRD4 100 nM trametinib	BRD4 100 nM trametinib + JQ1	BRD4 JQ1	BRD4 DMSO	MED1 100 nM trametinib	MED1 100 nM trametinib + JQ1	MED1 JQ1	MED1 DMSO	CEBPB 100 nM trametinib	CEBPB 100 nM trametinib + JQ1	CEBPB JQ1	CEBPB DMSO	p300 100 nM trametinib	p300 100 nM trametinib + JQ1	p300 JQ1	p300 DMSO	H3K4me3 500 nM trametinib	H3K4me3 DMSO	H3K27ac 100 nM trametinib	H3K27ac 100 nM trametinib + JQ1	H3K27ac JQ1	H3K27ac DMSO	Promotor	Enhancer	nearby Kinases	nearby Transcription Factors	nearby genes
chr10:52134390-52179100	44710	enhancer	SGMS1	24.03	18.27	28.33	25.76	11.98	14.02	15.86	22.03	19.09	8.37	50.61	96.66	65.02	40.72	8.1	23.47	12.27	9.65	68.48	30.46	89.13	160.92	110.86	51.65		SGMS1			SGMS1::chr10:52193315/-:0000014215|SGMS1::chr10:52104104/-:-000030286|SGMS1::chr10:52350006/-:0000170906|SGMS1::chr10:52220573/-:0000041473|SGMS1::chr10:52226691/-:0000047591|SGMS1::chr10:52279680/-:0000100580|SGMS1::chr10:52193315/-:0000014215|SGMS1::chr10:52104104/-:-000030286|SGMS1::chr10:52350006/-:0000170906|SGMS1::chr10:52220573/-:0000041473|SGMS1::chr10:52226691/-:0000047591|SGMS1::chr10:5…
chr13:103373865-103378124	4259	enhancer	ERCC5|METTL21C|BIVM|BIVM-ERCC5	0.66	1.09	2.31	2.43	0.45	0.07	2.12	1.76	1.07	0.01	22.95	30.66	19.11	10.16	0.67	1.6	0.37	0.47	-1.17	-0.85	1.98	4.75	0.31	-0.78		ERCC5|METTL21C|BIVM|BIVM-ERCC5			CCDC168::chr13:103411421/-:0000033297|KDELC1::chr13:103451403/-:0000073279|TPP2::chr13:103249285/+:0000124580|TEX30::chr13:103421890/-:0000043766|TEX30::chr13:103422435/-:0000044311|TEX30::chr13:103426170/-:0000048046|ERCC5::chr13:103498190/+:-000120066|METTL21C::chr13:103346870/-:-000026995|BIVM::chr13:103473386/+:-000095262|BIVM::chr13:103459495/+:-000081371|BIVM::chr13:103457656/+:-000079532|B…
chr6:109034823-109042911	8088	enhancer	ARMC2	1.58	0.78	2.55	3.68	1.21	0.35	2.59	2.35	1.45	0.74	9.75	15.2	9.66	4.7	1.51	2.43	1.93	0.79	0.06	-0.93	1.47	1.77	1.14	-0.37		ARMC2		FOXO3	FOXO3::chr6:108881025/+:0000153798|FOXO3::chr6:108882068/+:0000152755|FOXO3::chr6:108882288/+:0000152535|ARMC2::chr6:109190026/+:-000147115|ARMC2::chr6:109197345/+:-000154434|ARMC2::chr6:109169618/+:-000126707|ARMC2::chr6:109175427/+:-000132516
chr22:36538168-36557001	18833	promotor	APOL3	18.91	3.26	45.96	19.01	1.53	1.98	19.08	21.82	5.42	3.8	20.61	35.66	11.81	5.87	7.46	14.04	3.66	1.35	3.02	-0.99	73.37	119.64	18.99	8.29	APOL3	RBFOX2|APOL1			RBFOX2::chr22:36424584/-:-000113584|MYH9::chr22:36745299/-:0000188298|APOL4::chr22:36597933/-:0000040932|APOL4::chr22:36600878/-:0000043877|APOL4::chr22:36598100/-:0000041099|APOL4::chr22:36597933/-:0000040932|APOL4::chr22:36600878/-:0000043877|APOL4::chr22:36598100/-:0000041099|APOL3::chr22:36556836/-:0000000000|APOL3::chr22:36538105/-:-000000063|APOL3::chr22:36562224/-:0000005223|APOL3::chr22:3…
chr2:28356831-28357765	934	genebody_intron	BRE	1.02	0.76	0.43	0.91	0.11	0.07	0.34	0.76	0.34	0.03	2.01	3.39	1.62	0.49	0.18	0.26	0.09	0.16	0.18	-0.05	0.18	0.54	0.04	0.05
chr14:102605211-102606678	1467	promotor	HSP90AA1|WDR20	-0.29	-0.28	0.89	1.36	1.07	0.77	1.14	0.87	1.18	1.7	-0.15	0.27	-0.14	0.21	0.21	0.14	0.34	0.47	24.47	22.25	7.53	6.44	6.18	7.35	HSP90AA1|WDR20	ZNF839|HSP90AA1	MOK		MOK::chr14:102771536/-:0000164858|HSP90AA1::chr14:102606085/-:0000000000|HSP90AA1::chr14:102553511/-:-000051700|HSP90AA1::chr14:102606085/-:0000000000|HSP90AA1::chr14:102553511/-:-000051700|ZNF839::chr14:102786087/+:-000179409|ZNF839::chr14:102783713/+:-000177035|ZNF839::chr14:102785634/+:-000178956|ZNF839::chr14:102792321/+:-000185643|WDR20::chr14:102606188/+:0000000000|DYNC1H1::chr14:102430864/…
chr19:56110130-56118274	8144	promotor	ZNF524|FIZ1	0.96	0.73	8.42	4.14	3.2	6.63	5.17	4.12	3.91	7.86	-0.12	-0.12	-0.01	0.91	0.88	2.28	1.14	2.66	58.07	46.17	45.09	36.32	35.27	48.6	ZNF524|FIZ1	RFPL4A|U2AF2|ISOC2|ZNF580|ZNF865|EPN1|ZNF581|CCDC106|SBK2|ZNF579|UBE2S	SBK2	ZNF628|ZNF580|ZNF865|ZNF581|ZNF524|FIZ1|ZNF784|ZNF579	U2AF2::chr19:56165415/+:-000047141|ZNF628::chr19:55987698/+:0000122432|ZNF628::chr19:55991200/+:0000118930|ISOC2::chr19:55967855/-:-000142275|ISOC2::chr19:55973048/-:-000137082|CCDC106::chr19:56158953/+:-000040679|CCDC106::chr19:56160367/+:-000042093|EPN1::chr19:56186560/+:-000068286|EPN1::chr19:56189892/+:-000071618|EPN1::chr19:56187990/+:-000069716|SSC5D::chr19:55999869/+:0000110261|NLRP9::chr1…
chr3:101567407-101570368	2961	promotor	NFKBIZ	-1.18	-0.98	4.99	4.42	2.65	2.53	4.15	3.05	3.52	3.35	6.34	8.13	6.95	5.6	0.35	1.85	0.62	0.94	39.59	30.53	15.11	11.75	10.69	16.16	NFKBIZ	RPL24|ZBTB11		ZBTB11	NFKBIZ::chr3:101548456/+:0000018951|NFKBIZ::chr3:101570928/+:-000000560|NFKBIZ::chr3:101546833/+:0000020574|NFKBIZ::chr3:101568357/+:0000000000|RPL24::chr3:101405562/-:-000161845|ZBTB11::chr3:101395987/-:-000171420|NXPE3::chr3:101498028/+:0000069379|NXPE3::chr3:101504245/+:0000063162|NXPE3::chr3:101498285/+:0000069122|NXPE3::chr3:101500953/+:0000066454|NXPE3::chr3:101501503/+:0000065904|NXPE3::ch…
chr2:31456569-31457279	710	promotor	EHD3	0.67	0.3	0.46	0.56	0.24	0.29	0.36	0.39	0.18	0.34	0.06	0.18	0.36	0.3	0.26	0.15	0.18	0.18	0.3	0.26	0.59	0.57	0.61	0.08	EHD3	GALNT14|CAPN14			GALNT14::chr2:31337692/-:-000118877|GALNT14::chr2:31352505/-:-000104064|GALNT14::chr2:31361591/-:-000094978|GALNT14::chr2:31348118/-:-000108451|CAPN14::chr2:31428364/-:-000028205|CAPN14::chr2:31440410/-:-000016159|EHD3::chr2:31456879/+:0000000000|XDH::chr2:31637610/-:0000180331
chr12:107908912-107909846	934	enhancer	PWP1|BTBD11	0.25	0.37	0.29	0.27	0.72	0.59	0.13	0.24	0.49	0.24	2.27	2.12	5.07	4.21	-0.04	-0.06	0.4	0.96	-0.21	0	-0.05	0.06	1.7	1.42		PWP1|BTBD11			PWP1::chr12:108079589/+:-000169743|BTBD11::chr12:107974633/+:-000064787|BTBD11::chr12:107712196/+:0000196716|BTBD11::chr12:107974633/+:-000064787|BTBD11::chr12:107712196/+:0000196716
chr3:71030478-71045507	15029	genebody_exon	FOXP1	3.48	1.43	3.2	4.46	0.68	0.53	1.46	2.1	2.68	0.97	4.79	10.93	3.69	2.79	1.52	3.47	1.27	0.09	-2.09	0.4	15.56	35.47	17.16	6.1				FOXP1	FOXP1::chr3:71102923/-:0000057416|FOXP1::chr3:71180091/-:0000134584|FOXP1::chr3:71114073/-:0000068566|FOXP1::chr3:71102923/-:0000057416|FOXP1::chr3:71180091/-:0000134584|FOXP1::chr3:71114073/-:0000068566
chr4:112190392-112191255	863	other		0.69	0.56	0.79	0.48	0.15	0.2	0.74	0.23	0.3	0.17	0.89	0.77	0.53	0.57	0.43	0.45	0.04	0.23	0.73	0.37	0.67	0.9	0.59	0.12
chr14:95064821-95077642	12821	promotor	SERPINA3	20.9	16.48	11.17	5.76	4.49	9.29	8.16	6.22	6.06	9.6	14.24	22.89	21.95	17.63	2.74	4.82	4.25	4.65	1.07	-0.29	40.36	40.31	33.74	34.12	SERPINA3	SERPINA12|SERPINA11|SERPINA9		GSC	SERPINA12::chr14:94964766/-:-000100055|SERPINA12::chr14:94964750/-:-000100071|SERPINA12::chr14:94984180/-:-000080641|SERPINA12::chr14:94970558/-:-000094263|SERPINA12::chr14:94982490/-:-000082331|SERPINA11::chr14:94915113/-:-000149708|SERPINA11::chr14:94919121/-:-000145700|SERPINA4::chr14:95027756/+:0000037065|SERPINA4::chr14:95029802/+:0000035019|SERPINA5::chr14:95047951/+:0000016870|SERPINA5::ch…
chr10:72647687-72648860	1173	promotor	PCBD1	0.29	0.43	0.8	0.72	0.39	1.02	1.25	0.82	0.48	0.99	-0.1	0.22	-0.01	0.32	0.19	0.72	0.1	0.32	9.38	8.49	3.17	2.69	3.35	6.33	PCBD1	TBATA			SGPL1::chr10:72576566/+:0000071121|SGPL1::chr10:72575703/+:0000071984|PCBD1::chr10:72644988/-:-000002699|PCBD1::chr10:72645685/-:-000002002|PCBD1::chr10:72648010/-:0000000000|PCBD1::chr10:72648542/-:0000000000|TBATA::chr10:72545156/-:-000102531|TBATA::chr10:72544528/-:-000103159|TBATA::chr10:72543280/-:-000104407
chr1:240928540-240929870	1330	enhancer	GREM2	0.39	0.57	1.52	0.67	0.01	0.69	0.06	0.44	0.77	0.65	0.01	0.43	0.38	0.41	0.29	0.57	0.55	0.78	0.44	0.2	3.62	2.78	3.27	3.64		GREM2			GREM2::chr1:240775461/-:-000153079
chr1:145083299-145118556	35257	promotor	SEC22B	9.8	3.56	50.47	29.36	4.3	9.33	22.69	20.45	11.08	3.72	116.52	191.32	147.7	102.91	11.56	22.6	10.82	8.58	27.34	19.47	94.94	130.4	25.85	16.35	SEC22B	PDE4DIP|NBPF10|NOTCH2NL			PDE4DIP::chr1:145039994/-:-000043305|PDE4DIP::chr1:144994700/-:-000088599|PDE4DIP::chr1:144997110/-:-000086189|PDE4DIP::chr1:144995032/-:-000088267|PDE4DIP::chr1:144932364/-:-000150935|PDE4DIP::chr1:144995081/-:-000088218|PDE4DIP::chr1:145076185/-:-000007114|PDE4DIP::chr1:145039994/-:-000043305|PDE4DIP::chr1:144994700/-:-000088599|PDE4DIP::chr1:144997110/-:-000086189|PDE4DIP::chr1:144995032/-:-00…
chr12:117175206-117176620	1414	promotor	C12orf49|RNFT2	-0.73	-0.63	1.17	1.48	1.02	1.03	1.13	0.98	1.11	0.89	0.33	0.92	0.94	0.39	0.12	0.83	0.46	0.51	15.19	12.82	2.79	1.1	1.11	3.17	C12orf49|RNFT2	FBXW8			C12orf49::chr12:117175874/-:0000000000|FBXW8::chr12:117348760/+:-000172140|MAP1LC3B2::chr12:116997185/+:0000178021|MAP1LC3B2::chr12:117013646/+:0000161560|MAP1LC3B2::chr12:116997185/+:0000178021|MAP1LC3B2::chr12:117013646/+:0000161560|RNFT2::chr12:117178149/+:-000001529|RNFT2::chr12:117176095/+:0000000000|HRK::chr12:117319231/-:0000142611
chr3:191046067-191049952	3885	promotor	CCDC50|UTS2B	-1.66	-0.56	7.36	4.62	2.66	3.15	2.49	2.71	2.62	3.3	4.65	6.55	4.45	4.04	0.64	0.95	0.83	0.76	54.03	36.04	32.75	39.57	33.18	21.65	CCDC50|UTS2B	UTS2B			CCDC50::chr3:191046873/+:0000000000|UTS2B::chr3:191034227/-:-000011840|UTS2B::chr3:191046497/-:0000000000|UTS2B::chr3:191000101/-:-000045966|UTS2B::chr3:191048324/-:0000000000|UTS2B::chr3:191022336/-:-000023731
chr17:41115952-41117300	1348	promotor	AARSD1	-0.41	-0.59	1.15	1.53	0.71	1.3	0.58	0.53	1.06	1.55	1.02	1.2	0.97	1.47	0.04	-0.15	0.01	0.19	18.01	18.23	6.98	3.56	4.31	6.89	AARSD1	BECN1|IFI35|RPL27|RUNDC1|COA3|RND2	WNK4		BRCA1::chr17:41276131/-:0000158831|BRCA1::chr17:41277467/-:0000160167|BRCA1::chr17:41277499/-:0000160199|BRCA1::chr17:41258549/-:0000141249|CNTD1::chr17:40950853/+:0000165099|AOC3::chr17:41006464/+:0000109488|AOC3::chr17:41003200/+:0000112752|AOC3::chr17:41005259/+:0000110693|AOC2::chr17:40996608/+:0000119344|BECN1::chr17:40976309/-:-000139643|BECN1::chr17:40975896/-:-000140056|VPS25::chr17:40925…
chr16:85643498-85647415	3917	promotor	GSE1	3.72	3.04	8.64	5.77	4.2	8.05	4.75	3.26	4.19	8.18	0.6	1.65	1.72	3.49	0.99	0.96	1.37	1.96	31.64	26.71	41.4	27.66	26.58	40.34	GSE1	GSE1|COX4I1			C16orf74::chr16:85768840/-:0000121425|C16orf74::chr16:85784688/-:0000137273|GINS2::chr16:85722587/-:0000075172|COX4I1::chr16:85834810/+:-000187395|COX4I1::chr16:85833172/+:-000185757|EMC8::chr16:85833147/-:0000185732|GSE1::chr16:85682157/+:-000034742|GSE1::chr16:85646841/+:0000000000|GSE1::chr16:85645028/+:0000000000
chr3:36688450-36705936	17486	3 prime	DCLK3|STAC|TRANK1	7.27	5.1	9.77	4.05	2.06	3.03	5.94	1.77	1.14	2.82	5.56	8.02	3.55	8.28	3.97	3.78	1.26	2.48	-2.21	-2.35	29.29	30.16	11.56	12.09			DCLK3		DCLK3::chr3:36781351/-:0000075415|DCLK3::chr3:36780574/-:0000074638
chr21:38159960-38161429	1469	genebody_intron	HLCS	1.65	2.33	0.92	0.64	0.75	1.4	0.48	0.27	0.98	0.95	0.99	1.25	1.12	0.9	0.12	0.52	0.48	0.68	2.85	2.03	4.83	5.74	8.01	7.08					SIM2::chr21:38071432/+:0000088528|HLCS::chr21:38320586/-:0000159157|HLCS::chr21:38353263/-:0000191834|HLCS::chr21:38334469/-:0000173040|HLCS::chr21:38311293/-:0000149864|HLCS::chr21:38318453/-:0000157024|HLCS::chr21:38338955/-:0000177526
chr3:107849591-107850714	1123	enhancer	HHLA2|CD47	2.49	1.33	0.43	0.56	1.27	0.86	0.46	0.28	1.07	0.69	0.77	1.64	1.29	1.55	0.29	0.93	1.3	1.01	0.14	0.44	0.42	0.71	0.37	0.37		HHLA2|CD47			HHLA2::chr3:108029501/+:-000178787|HHLA2::chr3:108021331/+:-000170617|HHLA2::chr3:108030631/+:-000179917|HHLA2::chr3:108047116/+:-000196402|HHLA2::chr3:108015336/+:-000164622|CD47::chr3:107809934/-:-000039657|IFT57::chr3:107941416/-:0000090702
chr1:145648769-145653138	4369	enhancer	POLR3GL|NUDT17|PDZK1|POLR3C	1.59	3.16	2.93	3.45	1.14	0.95	1.21	1.23	2.32	2.04	6.34	14.23	9.68	7.54	0.44	2.63	1.01	2.04	-0.33	-0.43	7.56	14.88	4.45	1.02		POLR3GL|NUDT17|PDZK1|POLR3C		PIAS3	RNF115::chr1:145610989/+:0000037780|RBM8A::chr1:145507556/+:0000141213|PIAS3::chr1:145575987/+:0000072782|CD160::chr1:145715638/-:0000062500|CD160::chr1:145706829/-:0000053691|CD160::chr1:145710283/-:0000057145|ANKRD34A::chr1:145470507/+:0000178262|ANKRD34A::chr1:145472121/+:0000176648|ANKRD34A::chr1:145473208/+:0000175561|ANKRD34A::chr1:145471552/+:0000177217|LIX1L::chr1:145477066/+:0000171703|P…
chr8:131205351-131220978	15627	genebody_intron	ASAP1	14.82	10.7	8.76	4.19	1.72	3.47	5.79	5.04	3.71	4.74	12.48	18.41	13.38	11.05	1.93	4.13	2.86	2.87	2.08	-0.4	21.57	20.55	18.94	11.78					ASAP1::chr8:131374016/-:0000153038|ASAP1::chr8:131414215/-:0000193237|ASAP1::chr8:131374016/-:0000153038|ASAP1::chr8:131414215/-:0000193237
chr3:94873332-94874333	1001	other		0.49	0.55	0.61	0.36	0.1	0.15	0.9	0.27	0.41	0.37	1.12	1.84	1.65	1.12	0.31	0.33	0.18	0.35	-0.01	-0.01	-0.13	-0.15	0.08	-0.12
chr1:187897215-187898080	865	genebody_intron	FAM72C|SRGAP2D	0.03	-0.24	0.3	0.79	0.09	0.05	0	-0.07	0.1	-0.16	0.65	0.54	0.6	0.08	0.27	0.19	0.15	0.15	-0.1	-0.26	-0.18	-0.08	-0.04	-0.11
chr8:70023356-70024500	1144	other		-0.49	-0.2	0.47	1.08	0.11	0.12	-0.13	0.42	0.44	0.03	1.67	5.34	4.44	1.76	0.33	0.47	0.08	0.34	-0.45	-0.33	-0.25	0.18	-0.38	-0.43
chr2:40102306-40102996	690	enhancer	THUMPD2	0.4	0.23	0.65	0.57	0.11	0.16	0.73	0.27	0.27	0.51	3.18	2.42	1.82	2.04	0.29	0.54	0.31	0.48	0.34	0.04	0.58	0.71	0.44	0.39		THUMPD2			TMEM178A::chr2:39934188/+:0000168118|TMEM178A::chr2:39931220/+:0000171086|THUMPD2::chr2:40006415/-:-000095891
chr8:92612231-92613136	905	other		0.39	0.16	0.27	0.72	0.22	0.27	0.57	0.37	0.33	0.54	0.39	1.25	0.72	0.13	-0.03	0.07	-0.02	-0.07	-0.15	-0.12	1.2	1.74	0.63	0.15
chr4:76252050-76254137	2087	enhancer	THAP6	4.14	2.15	4.96	1.01	0.09	0.57	2.77	0.27	0.8	0.53	1.13	1.14	0.17	0.22	1.2	0.72	0.44	0.17	0.23	-0.43	11.44	6.51	4.19	1.77		THAP6		THAP6	RCHY1::chr4:76439639/-:0000185502|RCHY1::chr4:76434144/-:0000180007|RCHY1::chr4:76434505/-:0000180368|RCHY1::chr4:76419388/-:0000165251|THAP6::chr4:76440642/+:-000186505|THAP6::chr4:76439653/+:-000185516
chr11:14395311-14406662	11351	enhancer	RRAS2	4.9	3.86	3.4	0.33	0.53	0.5	2.29	-0.38	1.44	1.77	7.85	4.88	2.14	3.48	1.17	0.44	-0.09	0.06	5.97	5.42	5.43	0.64	3.29	2.85		RRAS2			COPB1::chr11:14521440/-:0000114778|COPB1::chr11:14521414/-:0000114752|COPB1::chr11:14521403/-:0000114741|COPB1::chr11:14520530/-:0000113868|PSMA1::chr11:14541990/-:0000135328|PSMA1::chr11:14541990/-:0000135328|RRAS2::chr11:14317400/-:-000077911|RRAS2::chr11:14380729/-:-000014582|RRAS2::chr11:14316407/-:-000078904|RRAS2::chr11:14380072/-:-000015239|RRAS2::chr11:14380030/-:-000015281|RRAS2::chr11:1…
chr11:44087178-44089047	1869	promotor	ACCS	2.64	0.93	2.75	2.23	1.45	1.7	1.45	1.28	0.96	1.21	1.26	0.74	0.39	0.6	0.48	0.85	0.52	0.16	25.25	16.84	11.43	11.98	9.7	8.19	ACCS	EXT2			C11orf96::chr11:43964105/+:0000123073|EXT2::chr11:44117098/+:-000028051|EXT2::chr11:44117746/+:-000028699|EXT2::chr11:44129232/+:-000040185|ALKBH3::chr11:43902356/+:0000184822|ALKBH3::chr11:43904132/+:0000183046|ACCS::chr11:44087728/+:0000000000|ACCS::chr11:44087811/+:0000000000|ACCSL::chr11:44069530/+:0000017648
chr4:160338000-160340348	2348	3 prime	RAPGEF2	0.85	1.44	3.17	1.62	0.81	0.32	0.7	0.5	0.54	0.3	1.96	2.64	0.99	0.25	0.55	1.21	0.5	0.37	-0.61	-0.41	10.59	17.99	5.8	3.09					RAPGEF2::chr4:160188997/+:0000149003
chrX:49011893-49029412	17519	promotor	PLP2|MAGIX	5.49	3.2	7.85	3.57	2.01	4.7	3.32	2.55	3.92	6.94	-0.45	0.47	0.41	1.94	0.44	0.24	0.1	1.34	24.05	24.94	37.66	33.61	31.64	37.08	PLP2|MAGIX	OTUD5|CCDC22|GPKOW|GAGE8|WDR45|GAGE5|GAGE4|PRAF2|TFE3|KCND1|PPP1R3F|GAGE2D|GAGE2E|GAGE2A|GAGE2C|GAGE12I|GAGE12J|GRIPAP1|GAGE7|GAGE10|GAGE13		FOXP3|TFE3	FOXP3::chrX:49114983/-:0000085571|FOXP3::chrX:49121287/-:0000091875|OTUD5::chrX:48814892/-:-000197001|OTUD5::chrX:48815647/-:-000196246|CCDC22::chrX:49091926/+:-000062514|GAGE7::chrX:49217762/+:-000188350|GAGE7::chrX:49216677/+:-000187265|PLP2::chrX:49028183/+:0000000000|GPKOW::chrX:48980150/-:-000031743|GAGE8::chrX:49216658/+:-000187246|GAGE8::chrX:49207159/+:-000177747|GAGE8::chrX:49189207/+:-0…
chr2:113381793-113407341	25548	promotor	SLC20A1	16.25	30.96	3.28	4.55	16.64	21.86	5.29	2.75	16.64	18.18	3.09	7.17	12.92	12.66	-0.35	1.33	4.5	7.92	39.23	53.9	27.98	32.39	98.94	91.49	SLC20A1	RGPD5|RGPD8			SLC20A1::chr2:113404139/+:0000000000|SLC20A1::chr2:113403433/+:0000000000|CHCHD5::chr2:113343550/+:0000038243|CHCHD5::chr2:113342013/+:0000039780|CHCHD5::chr2:113342448/+:0000039345|TTL::chr2:113239742/+:0000142051|POLR1B::chr2:113304659/+:0000077134|POLR1B::chr2:113303407/+:0000078386|POLR1B::chr2:113299612/+:0000082181|POLR1B::chr2:113304588/+:0000077205|POLR1B::chr2:113308442/+:0000073351|POLR…
chr2:200137470-200138387	917	genebody_intron	SATB2	0.41	0	0.23	0.96	0.63	0.3	0.54	0.46	0.43	0.39	3.35	8.57	5.31	3.09	0.3	0.95	0.67	0.13	0.01	-0.17	-0.03	0.49	0.36	-0.16				SATB2	SATB2::chr2:200325254/-:0000186867|SATB2::chr2:200320818/-:0000182431|SATB2::chr2:200329830/-:0000191443|SATB2::chr2:200335988/-:0000197601|SATB2::chr2:200322818/-:0000184431
chr6:144471006-144480076	9070	promotor	STX11	4.27	3.01	2.81	2.2	1.61	0.61	2.67	1.56	2.06	1.7	7.27	7.52	2.72	2.94	1.08	2.11	0.97	1.15	24.92	20.76	3.11	5.51	5.73	1.97	STX11	SF3B5|STX11|PLAGL1|UTRN		PLAGL1	SF3B5::chr6:144416753/-:-000054253|STX11::chr6:144471653/+:0000000000|STX11::chr6:144507759/+:-000027683|STX11::chr6:144471653/+:0000000000|STX11::chr6:144507759/+:-000027683|PLAGL1::chr6:144281678/-:-000189328|PLAGL1::chr6:144385734/-:-000085272|PLAGL1::chr6:144287334/-:-000183672|PLAGL1::chr6:144287348/-:-000183658|PLAGL1::chr6:144329552/-:-000141454|PLAGL1::chr6:144306310/-:-000164696|PLAGL1::…
chr2:214143639-214149838	6199	promotor	LOC100130451|SPAG16	-0.28	-1.06	5.9	2.22	0.92	0.72	2.54	2.25	1.83	1.5	4.66	5.12	1	0.61	2.14	1.29	0.17	0.85	13.24	9.53	9.13	7.18	3.66	3.49	LOC100130451|SPAG16	IKZF2		IKZF2	LOC100130451::chr2:214148928/-:0000000000|SPAG16::chr2:214149102/+:0000000000|IKZF2::chr2:214015057/-:-000128582|IKZF2::chr2:214014970/-:-000128669|IKZF2::chr2:214016332/-:-000127307|IKZF2::chr2:214013367/-:-000130272
chr12:124117542-124119137	1595	promotor	EIF2B1|GTF2H3	-0.02	-0.14	1	1.19	0.71	1.65	0.74	1.09	1.35	1.68	-0.07	-0.07	0.06	0.08	-0.49	-0.15	-0.08	-0.09	38.16	34.81	5.6	2.54	4.02	8.08	EIF2B1|GTF2H3	DNAH10|GTF2H3|TCTN2|ATP6V0A2|RILPL1|RILPL2			RILPL2::chr12:123921279/-:-000196263|DNAH10::chr12:124247041/+:-000127904|TMED2::chr12:124069075/+:0000048467|GTF2H3::chr12:124118285/+:0000000000|GTF2H3::chr12:124123810/+:-000004673|GTF2H3::chr12:124137078/+:-000017941|GTF2H3::chr12:124135540/+:-000016403|GTF2H3::chr12:124130001/+:-000010864|EIF2B1::chr12:124118322/-:0000000000|TCTN2::chr12:124155659/+:-000036522|SNRNP35::chr12:123944250/+:0000…
chr5:130171910-130173268	1358	other		-0.32	-0.39	1.31	0.46	0.02	0.34	0.57	0.64	0.13	0.14	0.52	1.04	0.7	0.57	0.39	0.71	0.19	0.54	5.54	4.07	3.91	9.42	5.62	2.82
chr11:35843078-35844441	1363	enhancer	LDLRAD3	1.22	1.18	1.51	1.01	0.83	0.93	0.64	0.62	1.2	0.8	0.46	0.5	0.15	0.14	0.05	0.48	0.07	0.11	-0.04	0.25	3.03	3.84	2.89	3.4		LDLRAD3			TRIM44::chr11:35684299/+:0000158779|LDLRAD3::chr11:35965530/+:-000121089
chr14:100222179-100223171	992	enhancer	EML1|CCDC85C	3.31	2.12	0.69	0.81	0.42	0.16	0.68	0.55	0.34	0.75	0.19	0.51	0.61	0.55	0.18	0.4	0.21	0.1	-0.01	-0.12	1.56	1.25	1.07	0.64		EML1|CCDC85C			HHIPL1::chr14:100111479/+:0000110700|EML1::chr14:100259744/+:-000036573|CCDC85C::chr14:100070726/-:-000151453
chr2:24148197-24164105	15908	promotor	UBXN2A|ATAD2B	2.19	2.05	4.66	5.11	2.65	4.67	4.18	3.86	5.84	6.46	0.02	1.33	0.86	1.04	1.27	1.04	0.87	1.59	54.51	42.79	29.58	22.75	23.34	26.02	UBXN2A|ATAD2B	MFSD2B|FKBP1B|FAM228B|UBXN2A			SF3B6::chr2:24299313/-:0000135208|MFSD2B::chr2:24232952/+:-000068847|TP53I3::chr2:24307200/-:0000143095|TP53I3::chr2:24308084/-:0000143979|PFN4::chr2:24345416/-:0000181311|PFN4::chr2:24346346/-:0000182241|FKBP1B::chr2:24272583/+:-000108478|FAM228B::chr2:24318010/+:-000153905|FAM228B::chr2:24347199/+:-000183094|FAM228B::chr2:24362239/+:-000198134|FAM228B::chr2:24357988/+:-000193883|FAM228B::chr2:2…
chr7:50859082-50863284	4202	promotor	GRB10	0.41	-0.31	4.24	2.67	2.72	2.49	2.8	1.9	1.93	2.31	6.11	9.36	8.66	8.3	0.14	0.96	-0.33	0.58	38.33	29.59	17.38	15.33	11.9	14.82	GRB10	GRB10			GRB10::chr7:50772997/-:-000086085|GRB10::chr7:50861158/-:0000000000|GRB10::chr7:50742354/-:-000116728|GRB10::chr7:50800049/-:-000059033|GRB10::chr7:50771604/-:-000087478|GRB10::chr7:50823752/-:-000035330|GRB10::chr7:50772997/-:-000086085|GRB10::chr7:50861158/-:0000000000|GRB10::chr7:50742354/-:-000116728|GRB10::chr7:50800049/-:-000059033|GRB10::chr7:50771604/-:-000087478|GRB10::chr7:50823752/-:-0…
chr19:43335057-43336199	1142	enhancer	PSG8|PSG3	1.26	1.32	1.21	0.46	0.21	0.21	0.79	0.57	0.37	0.5	0.56	1.93	0.61	0.83	-0.08	0.23	0.35	0.32	-0.31	-0.24	1.56	1.69	0.36	0.61		PSG8|PSG3			PSG11::chr19:43530630/-:0000194431|PSG8::chr19:43269830/-:-000065227|PSG6::chr19:43422075/-:0000085876|PSG7::chr19:43433871/-:0000097672|PSG7::chr19:43439920/-:0000103721|PSG7::chr19:43441329/-:0000105130|PSG3::chr19:43244667/-:-000090390|PSG1::chr19:43383818/-:0000047619|PSG1::chr19:43383870/-:0000047671
chr4:151189203-151190150	947	genebody_intron	LRBA	0.82	1.26	-0.11	0	-0.07	0.47	0.13	-0.01	-0.08	-0.1	0.01	0.12	0.52	0.33	-0.07	0.13	-0.03	0.05	-0.31	-0.36	0.05	-0.14	-0.32	0.01			DCLK2		DCLK2::chr4:150999425/+:0000189778
chr6:36390295-36391940	1645	promotor	PXT1	-0.66	-0.01	1.22	0.99	0.55	1.49	0.22	0.65	0.21	1.39	-0.49	0.01	0.33	0.48	-0.08	0.83	0.21	0.32	7.85	7.37	2.48	3.4	2.82	3.92	PXT1	SRSF3|ETV7|C6orf222|KCTD20	STK38	ETV7	SRSF3::chr6:36562089/+:-000170149|SRSF3::chr6:36564537/+:-000172597|ETV7::chr6:36355576/-:-000034719|ETV7::chr6:36343811/-:-000046484|ETV7::chr6:36341354/-:-000048941|ETV7::chr6:36355567/-:-000034728|ETV7::chr6:36353445/-:-000036850|ETV7::chr6:36339336/-:-000050959|PXT1::chr6:36393867/-:0000001927|PXT1::chr6:36406662/-:0000014722|PXT1::chr6:36410665/-:0000018725|PXT1::chr6:36393867/-:0000001927|P…
chr22:45216224-45224442	8218	genebody_exon	PRR5-ARHGAP8|PRR5-ARHGAP8|PRR5-ARHGAP8|PRR5-ARHGAP8	3.77	0.58	3.64	1.31	0.08	0.44	3.17	1.88	0.58	1.17	2.86	1.98	0.34	0.58	1.1	0.5	0.55	0.41	-0.71	-0.72	2.33	-0.2	-0.55	-0.48					PRR5-ARHGAP8::chr22:45098077/+:0000118147|ARHGAP8::chr22:45182336/+:0000033888|ARHGAP8::chr22:45148437/+:0000067787|PRR5::chr22:45121123/+:0000095101|PRR5::chr22:45075226/+:0000140998|PRR5::chr22:45072687/+:0000143537|PRR5::chr22:45110470/+:0000105754|PRR5::chr22:45064426/+:0000151798|PRR5::chr22:45098077/+:0000118147|PRR5::chr22:45098371/+:0000117853|PRR5::chr22:45122456/+:0000093768|PRR5::chr22…
chr1:42419832-42422317	2485	enhancer	GUCA2B|HIVEP3	4.6	4.98	1.52	0.89	1.03	2.69	0.59	0.32	0.97	0.9	4.04	3.54	4.27	5.14	0.46	0.98	1.02	1.34	2.08	1.8	8.39	9.38	19.95	17.01		GUCA2B|HIVEP3		HIVEP3	GUCA2B::chr1:42619091/+:-000196774|HIVEP3::chr1:42384377/-:-000035455
chr11:7913184-7928361	15177	enhancer	TUB|EIF3F	2.71	1.14	11.37	1.11	-0.33	1.84	3.89	0.87	0.01	1.22	9.76	9.37	1.32	3.01	1.18	1.16	0.22	0.07	-0.23	-0.54	22.38	21.25	4.99	5.88		TUB|EIF3F		TUB	TUB::chr11:8102908/+:-000174547|TUB::chr11:8060179/+:-000131818|TUB::chr11:8102908/+:-000174547|TUB::chr11:8060179/+:-000131818|NLRP10::chr11:7985058/-:0000056697|EIF3F::chr11:8008866/+:-000080505
chr12:71550932-71552618	1686	promotor	TSPAN8	0.86	0.55	1.27	0.86	0	0.19	-0.02	1.09	0.28	0.29	2.56	1.95	0.77	0.83	0.35	0.87	0.09	0.58	7.93	4.41	5.48	4.87	0.77	1.3	TSPAN8				TSPAN8::chr12:71551566/-:0000000000|TSPAN8::chr12:71551778/-:0000000000
chr5:124160015-124161361	1346	enhancer	ZNF608	0.52	0.27	2.34	1.17	0.55	0.32	2.19	1.09	0.98	0.42	7.44	7.82	5.17	5.07	0.6	0.96	0.6	1.11	0.86	0.04	1.01	1.29	0.44	-0.22		ZNF608			ZNF608::chr5:124080804/-:-000079211
chr2:19873017-19873590	573	other		0.07	-0.1	0.26	0.35	0.19	-0.09	0.2	0.12	0.49	-0.08	0.56	0.73	0.63	0.14	0.2	0.41	0.22	-0.07	0.01	-0.03	0.15	0.23	0.31	0.1
chr12:81093371-81098910	5539	promotor	MYF6	0.76	2.13	16.81	4.31	1.19	6.01	3.06	2.45	1.44	1.8	2.83	4.47	1.31	1.06	0.86	3.17	1.23	2.37	1.67	2.25	49.53	67.6	33.51	26.73	MYF6	MYF5		MYF5|MYF6	MYF5::chr12:81110707/+:-000011797|MYF6::chr12:81101407/+:-000002497
chr3:59521198-59528078	6880	other		3.6	3.33	4.74	1.67	0.02	3.28	1.69	1.53	0.26	2.89	1.11	1.44	1.02	3.1	1.23	1.23	0.41	2.16	-1.95	-2.06	10.94	12.86	4.53	9.17
chr18:20012089-20013575	1486	enhancer	CTAGE1	1.04	1.13	1.55	1.03	0.79	1.47	0.42	1.01	0.95	0.74	0.57	1.6	1	0.97	0.22	0.69	0.55	0.62	0.67	0.29	4.07	8.31	7.27	5.95		CTAGE1			CTAGE1::chr18:19997877/-:-000014212
chr8:103737618-103823917	86299	enhancer	KLF10	75.19	56.66	47.62	35.58	24.24	36.62	29.48	24.76	30.36	35.94	31.6	50.9	30.5	25.35	7.45	19.9	13.54	20.38	13.89	9.31	166.58	181.03	159.36	147.21		KLF10		KLF10	ODF1::chr8:103563847/+:0000173771|KLF10::chr8:103668129/-:-000069489|KLF10::chr8:103666191/-:-000071427|AZIN1::chr8:103870377/-:0000046460|AZIN1::chr8:103855974/-:0000032057|AZIN1::chr8:103876427/-:0000052510|AZIN1::chr8:103862371/-:0000038454
chr22:26118336-26119190	854	enhancer	MYO18B	0.53	0.22	0.08	1.32	0.36	0.11	0.54	0.18	0.37	-0.12	2.24	4.7	1.61	0.85	0.4	0.43	0.39	0.17	-0.19	-0.11	0.26	0.87	0.27	-0.04		MYO18B	ADRBK2		MYO18B::chr22:26156950/+:-000037760|MYO18B::chr22:26138119/+:-000018929|ADRBK2::chr22:25960860/+:0000157476
chr3:48699926-48702138	2212	promotor	CELSR3	1.1	0.73	4.31	2.45	2.7	4.01	2.69	1.93	2.61	4.88	2.72	2.54	1.65	2.29	0.78	1.64	0.74	1.57	9.8	6.92	18.11	15.06	14.23	18.33	CELSR3	COL7A1|PFKFB4|SHISA5|SLC26A6|UCN2|UQCRC1	IP6K2		COL7A1::chr3:48632592/-:-000067334|TREX1::chr3:48506918/+:0000193008|TREX1::chr3:48508066/+:0000191860|TREX1::chr3:48508028/+:0000191898|CELSR3::chr3:48700347/-:0000000000|PFKFB4::chr3:48594226/-:-000105700|PRKAR2A::chr3:48885269/-:0000183131|SHISA5::chr3:48542246/-:-000157680|SHISA5::chr3:48542258/-:-000157668|SHISA5::chr3:48540625/-:-000159301|SHISA5::chr3:48541681/-:-000158245|SHISA5::chr3:485…
chr3:187663552-187705110	41558	enhancer	LPP	14.24	9.29	24.69	22.11	10.28	9.81	7.41	12.03	15.1	3.25	38.4	76.67	66.09	37.44	4.04	16.33	12.07	6.89	-6.72	-8.32	38.69	68.11	60.08	22.32		LPP			LPP::chr3:187871660/+:-000166550|LPP::chr3:187871660/+:-000166550
chr6:138871209-138877615	6406	enhancer	NHSL1	2.61	3.63	1.99	4.39	1.17	0.51	1.58	2.69	2.57	0.3	3.1	10.82	5.75	2.48	1.41	2.96	1.38	0.84	0.86	-0.02	0.49	2.68	0.77	-0.21		NHSL1			HEBP2::chr6:138725335/+:0000145874|NHSL1::chr6:138893667/-:0000016052|NHSL1::chr6:138820578/-:-000050631
chr4:146630593-146631595	1002	genebody_intron	C4orf51	1.68	1.06	0.41	1.02	0.6	0.38	0.21	0.63	0.44	0.2	0.24	0.86	0.44	0.26	0.35	0.36	0.49	0	0.02	0	0.43	1.65	0.29	-0.05				SMAD1	MMAA::chr4:146560226/+:0000070367|MMAA::chr4:146540539/+:0000090054|SMAD1::chr4:146435589/+:0000195004
chr9:134508855-134555540	46685	enhancer	UCK1	66.98	45.98	41.05	28.87	8.54	10.85	22.6	21.71	16.76	13.19	44.9	68.11	40.65	36.25	8.43	18.23	10.27	9.06	10.29	6	174.14	241.11	123.34	65.84		UCK1			POMT1::chr9:134379575/+:0000129280|POMT1::chr9:134381789/+:0000127066|POMT1::chr9:134381500/+:0000127355|POMT1::chr9:134378288/+:0000130567|POMT1::chr9:134382754/+:0000126101|UCK1::chr9:134406661/-:-000102194|RAPGEF1::chr9:134615330/-:0000059790|RAPGEF1::chr9:134585228/-:0000029688|RAPGEF1::chr9:134612924/-:0000057384|RAPGEF1::chr9:134615330/-:0000059790|RAPGEF1::chr9:134585228/-:0000029688|RAPGE…
chr18:28591242-28591799	557	genebody_intron	DSC3	0.05	0.06	-0.02	0.25	0.58	0.16	0.01	0.03	0.39	0.39	0.15	0.92	0.94	0.65	-0.09	-0.02	0.16	0.27	-0.14	-0.14	-0.16	-0.09	-0.09	-0.02					DSC2::chr18:28682394/-:0000090595|DSC3::chr18:28622780/-:0000030981|DSC1::chr18:28742818/-:0000151019
chr13:98627686-98629783	2097	enhancer	FARP1	-0.26	-0.85	1.41	1.29	0.83	2.51	1.42	0.95	1.13	2.26	-0.11	0.1	0.11	0.51	0.25	0.41	0.09	0.71	37.12	29.79	9.69	5.75	8.7	17.04		FARP1			IPO5::chr13:98606372/+:0000021314|IPO5::chr13:98621976/+:0000005710|IPO5::chr13:98605928/+:0000021758|RNF113B::chr13:98829520/-:0000199737|FARP1::chr13:98795351/+:-000165568|FARP1::chr13:98794815/+:-000165032|FARP1::chr13:98795351/+:-000165568|FARP1::chr13:98794815/+:-000165032
chr19:16221784-16223260	1476	promotor	RAB8A	0.44	-0.26	1.42	1.34	0.86	1.7	2	0.76	2.05	2.16	0.21	0.22	0.17	0.63	0.93	0.82	0.9	0.58	18.56	15.92	5.25	3.25	5.76	9.58	RAB8A	CYP4F11|AP1M1|FAM32A|HSH2D			AP1M1::chr19:16308664/+:-000085404|TPM4::chr19:16187134/+:0000034650|TPM4::chr19:16178316/+:0000043468|CYP4F11::chr19:16045675/-:-000176109|CYP4F11::chr19:16045218/-:-000176566|CIB3::chr19:16284335/-:0000061075|RAB8A::chr19:16222489/+:0000000000|FAM32A::chr19:16296211/+:-000072951|HSH2D::chr19:16244837/+:-000021577|HSH2D::chr19:16262256/+:-000038996|HSH2D::chr19:16259533/+:-000036273|HSH2D::chr19…
chr2:23648465-23649423	958	enhancer	KLHL29	1.67	0.8	0.74	1.16	0.06	-0.03	0.63	0.91	0.91	0.54	2.31	7.02	4.98	2.37	0.52	1.15	0.44	0.31	0.64	0.23	1.73	1.99	0.71	0.24		KLHL29			KLHL29::chr2:23785021/+:-000135598|KLHL29::chr2:23608297/+:0000040168|KLHL29::chr2:23698429/+:-000049006|KLHL29::chr2:23785021/+:-000135598|KLHL29::chr2:23608297/+:0000040168|KLHL29::chr2:23698429/+:-000049006
chr1:19810331-19813245	2914	promotor	CAPZB	0.14	0.31	4.52	3.44	2.99	2.6	2.15	1.61	2.29	2.73	0	0.37	0.35	0.38	0.36	1.12	0.35	0.49	42.08	32.12	23.38	17.35	15.76	16.86	CAPZB	CAPZB|NBL1|HTR6|MINOS1-NBL1|MINOS1|AKR7A2|AKR7A3			CAPZB::chr1:19812134/-:0000000000|CAPZB::chr1:19811200/-:0000000000|CAPZB::chr1:19775823/-:-000034508|CAPZB::chr1:19812134/-:0000000000|CAPZB::chr1:19811200/-:0000000000|CAPZB::chr1:19775823/-:-000034508|NBL1::chr1:19972259/+:-000159014|NBL1::chr1:19971865/+:-000158620|NBL1::chr1:19970207/+:-000156962|NBL1::chr1:19969722/+:-000156477|NBL1::chr1:19969902/+:-000156657|NBL1::chr1:19981504/+:-0001682…
chr2:69525107-69535033	9926	3 prime	ANTXR1|NFU1|AAK1|GFPT1	4.8	3.84	2.17	2.28	0.75	1.03	2.83	1.32	1.71	2.09	8.81	15.83	9.06	4.46	0.4	2.54	1.07	0.66	8.61	6.27	2.53	2.31	1.25	0.95					GFPT1::chr2:69614385/-:0000079352|NFU1::chr2:69646735/-:0000111702|NFU1::chr2:69659136/-:0000124103|NFU1::chr2:69642430/-:0000107397|NFU1::chr2:69664759/-:0000129726
chr8:81811353-81812826	1473	enhancer	ZNF704	0.67	2.04	0.95	1.04	0.32	0.17	0.76	0.73	0.29	0.78	3.99	6.47	5.29	3.49	0.53	0.64	0.53	0.33	0.15	0.01	3.51	5.63	3.02	1.63		ZNF704			PAG1::chr8:81905541/-:0000092715|PAG1::chr8:81982404/-:0000169578|PAG1::chr8:81942323/-:0000129497|PAG1::chr8:81905541/-:0000092715|PAG1::chr8:81982404/-:0000169578|PAG1::chr8:81942323/-:0000129497|ZNF704::chr8:81733849/-:-000077504|ZNF704::chr8:81787015/-:-000024338
chr15:36871066-36872451	1385	promotor	C15orf41	0.26	0.41	1.47	1.07	0.7	1.27	1.6	0.88	0.97	1.12	0.08	0.31	0.23	0.15	0.41	0.26	0.39	0.52	18.36	13.99	9.88	8.7	6.43	8.16	C15orf41	C15orf41			C15orf41::chr15:36936478/+:-000064027|C15orf41::chr15:36871803/+:0000000000|C15orf41::chr15:36932805/+:-000060354|C15orf41::chr15:36887069/+:-000014618|C15orf41::chr15:36937423/+:-000064972|C15orf41::chr15:36950033/+:-000077582|C15orf41::chr15:36946298/+:-000073847|C15orf41::chr15:36936478/+:-000064027|C15orf41::chr15:36871803/+:0000000000|C15orf41::chr15:36932805/+:-000060354|C15orf41::chr15:368…
chr1:180470762-180503706	32944	promotor	ACBD6	9.02	8.58	6.75	5.26	2.52	13.09	4.61	2.09	4.5	5.4	4.53	4.24	5.29	11.87	0.49	2.83	0.71	6.51	30.24	27.33	26.83	17.64	21.11	33.87	ACBD6	XPR1			XPR1::chr1:180601145/+:-000097439|ACBD6::chr1:180472021/-:0000000000
chr19:35911013-35911901	888	enhancer	TMEM147|HAUS5|GAPDHS|FAM187B	0.84	0.84	0.86	0.45	0.12	0.31	0.51	0.41	0.08	0.32	0.54	0.75	0.15	0.32	0.25	0.31	0.24	0.11	0.22	0.06	0.55	0.16	0.02	0.02		TMEM147|HAUS5|GAPDHS|FAM187B		USF2	USF2::chr19:35759895/+:0000151118|FFAR1::chr19:35842444/+:0000068569|ATP4A::chr19:36054559/-:0000142658|HAMP::chr19:35773409/+:0000137604|CD22::chr19:35822921/+:0000088092|CD22::chr19:35820071/+:0000090942|CD22::chr19:35820068/+:0000090945|CD22::chr19:35823455/+:0000087558|HAUS5::chr19:36103645/+:-000191744|SBSN::chr19:36019252/-:0000107351|GAPDHS::chr19:36024313/+:-000112412|KRTDAP::chr19:359814…
chr9:121371029-121372292	1263	other		0.35	0.65	0.82	0.52	0.67	0.84	0.77	0.34	1.37	0.22	4.17	5.81	6.14	4.21	0.35	0.5	0.77	0.85	-0.27	-0.18	2.02	3.49	1.76	2.04
chr9:125112560-125113528	968	enhancer	PTGS1|LHX6|NDUFA8|RBM18	0.81	0.17	0.77	1.23	0.27	0.45	0.65	0.47	0.1	0.37	0	0.49	0.19	0.18	0.36	0.39	0.4	0.2	-0.35	-0.42	0.29	0.27	0.27	-0.05		PTGS1|LHX6|NDUFA8|RBM18		LHX6	MORN5::chr9:124922186/+:0000190374|PTGS1::chr9:125133464/+:-000019936|PTGS1::chr9:125140206/+:-000026678|PTGS1::chr9:125133283/+:-000019755|PTGS1::chr9:125140177/+:-000026649|PTGS1::chr9:125140711/+:-000027183|PTGS1::chr9:125133891/+:-000020363|PTGS1::chr9:125137600/+:-000024072|PTGS1::chr9:125132808/+:-000019280|MRRF::chr9:125026881/+:0000085679|MRRF::chr9:125033142/+:0000079418|LHX6::chr9:12499…
chr4:76437055-76440874	3819	promotor	RCHY1|THAP6	2.04	1.47	4.83	3.16	2.35	3.13	1.2	2.38	2.66	2.68	2.12	2.36	2.42	1.59	0.72	0.71	0.74	0.6	39.52	32.94	18.86	16.05	15.46	17.77	RCHY1|THAP6	RCHY1|C4orf26	CDKL2	THAP6	RCHY1::chr4:76439639/-:0000000000|RCHY1::chr4:76434144/-:-000002911|RCHY1::chr4:76434505/-:-000002550|RCHY1::chr4:76419388/-:-000017667|G3BP2::chr4:76598342/-:0000157468|G3BP2::chr4:76598666/-:0000157792|G3BP2::chr4:76587232/-:0000146358|CDKL2::chr4:76555720/-:0000114846|CDKL2::chr4:76551200/-:0000110326|THAP6::chr4:76440642/+:0000000000|THAP6::chr4:76439653/+:0000000000|C4orf26::chr4:76481257/+:…
chr12:20119926-20121114	1188	other		0.97	2.32	0.96	0.29	0.52	0.6	0.72	0.14	0.82	1.14	3.28	4.47	4.09	3.79	0.15	0.48	0.39	0.62	-0.33	-0.15	1.41	2.55	4.38	2.17
chr16:473568-476787	3219	promotor	RAB11FIP3	3.83	2.15	4.94	3.74	3.52	4.94	2.84	2.98	4.51	6.54	4.06	6.65	6.96	6.48	0.23	0.82	1.26	1.03	30.28	29.87	25.03	12.57	26.95	34	RAB11FIP3	RAB11FIP3|AXIN1|RGS11|RAB40C|CAPN15|NHLRC4|MRPL28|PIGQ|TMEM8A|LUC7L|PRR35	NME4		NME4::chr16:447191/+:0000026377|NME4::chr16:447741/+:0000025827|NME4::chr16:446754/+:0000026814|NME4::chr16:448989/+:0000024579|NME4::chr16:448207/+:0000025361|RAB11FIP3::chr16:475667/+:0000000000|RAB11FIP3::chr16:524849/+:-000048062|RAB11FIP3::chr16:475667/+:0000000000|RAB11FIP3::chr16:524849/+:-000048062|ITFG3::chr16:299547/+:0000174021|ITFG3::chr16:304379/+:0000169189|ITFG3::chr16:304386/+:000…
chr5:42807689-42813206	5517	promotor	SEPP1	2.06	1.99	7.64	3.85	1.13	2.63	0.72	1.42	0.96	0.35	7.26	9.58	6.88	5.36	1.41	2.05	-0.37	0.18	27.91	2.81	16.84	14.31	4.35	5.72	SEPP1				CCDC152::chr5:42759221/+:0000048468|CCDC152::chr5:42756919/+:0000050770|SEPP1::chr5:42808467/-:0000000000|SEPP1::chr5:42812023/-:0000000000|SEPP1::chr5:42809889/-:0000000000|SEPP1::chr5:42810879/-:0000000000
chr12:101381427-101382190	763	genebody_intron	ANO4	0.99	0.73	0.53	0.54	0.52	0.01	0.09	0.2	0.15	0.26	0.4	0.54	0.56	0.1	0.31	0.59	0.37	0.24	0.53	0.03	0.63	1.58	1.3	0.46					ANO4::chr12:101188373/+:0000193054|ANO4::chr12:101295423/+:0000086004|ANO4::chr12:101188373/+:0000193054|ANO4::chr12:101295423/+:0000086004
chr5:34563776-34564619	843	enhancer	RAI14	1.6	0.67	0.45	0.49	0.84	0.54	0.5	-0.09	0.62	0.33	0.17	0.48	0.6	0.68	0.42	0.54	0.56	0.32	0.52	1.01	1.35	1.36	2.11	0.71		RAI14			RAI14::chr5:34685136/+:-000120517|RAI14::chr5:34684611/+:-000119992|RAI14::chr5:34688172/+:-000123553|RAI14::chr5:34656595/+:-000091976|RAI14::chr5:34656432/+:-000091813|RAI14::chr5:34687663/+:-000123044|RAI14::chr5:34686976/+:-000122357
chr11:129764960-129766021	1061	promotor	NFRKB	0.36	-0.33	0.71	0.73	0.63	0.6	0.43	0.38	0.88	0.84	-0.13	-0.01	0.36	0.03	-0.08	0.13	0.11	0.27	9.39	6.81	4.44	1.85	2.51	3.14	NFRKB	APLP2		PRDM10	APLP2::chr11:129940462/+:-000174441|APLP2::chr11:129939715/+:-000173694|NFRKB::chr11:129764332/-:-000000628|NFRKB::chr11:129762903/-:-000002057|NFRKB::chr11:129762764/-:-000002196|NFRKB::chr11:129765489/-:0000000000|PRDM10::chr11:129817516/-:0000051495|PRDM10::chr11:129830976/-:0000064955|PRDM10::chr11:129872729/-:0000106708|TMEM45B::chr11:129722369/+:0000042591|TMEM45B::chr11:129685740/+:0000079…
chr19:770149-799034	28885	promotor	PTBP1	15.43	10.04	19.99	12.75	7.95	15.24	14.06	9.26	12.26	16.78	12.14	17.1	12.32	15.85	2.76	4.27	2.53	5.62	76.37	59.02	96.41	81.92	61.54	78.68	PTBP1	ARID3A|KISS1R|PRSS57|WDR18|CFD|AZU1|ELANE|POLRMT|RNF126|PRTN3		ARID3A	ARID3A::chr19:929261/+:-000130227|ARID3A::chr19:926036/+:-000127002|KISS1R::chr19:917341/+:-000118307|ELANE::chr19:852290/+:-000053256|WDR18::chr19:984327/+:-000185293|PRSS57::chr19:695460/-:-000074689|CFD::chr19:859664/+:-000060630|HCN2::chr19:589892/+:0000180257|FSTL3::chr19:676388/+:0000093761|AZU1::chr19:827830/+:-000028796|R3HDM4::chr19:913224/-:0000114190|LPPR3::chr19:821951/-:0000022917|LP…
chr17:39940223-39970040	29817	promotor	FKBP10|JUP|P3H4	29.6	20.09	13.41	10.28	8.25	11.2	10.19	6.64	8.33	10.84	7.16	12.33	10.36	7	2.65	6.07	2.93	3.75	76.62	67.58	65.02	59.46	57.22	63.2	FKBP10|JUP|P3H4	KLHL10|HAP1|CNP|NKIRAS2|KRT17|KRT16|JUP|KRT14|TTC25			KLHL10::chr17:39994042/+:-000024002|KLHL11::chr17:40021683/-:0000051643|HAP1::chr17:39890897/-:-000049326|CNP::chr17:40118758/+:-000148718|FKBP10::chr17:39968961/+:0000000000|NKIRAS2::chr17:40169593/+:-000199553|EIF1::chr17:39845126/+:0000095097|DNAJC7::chr17:40152587/-:0000182547|DNAJC7::chr17:40169182/-:0000199142|DNAJC7::chr17:40149256/-:0000179216|DNAJC7::chr17:40169714/-:0000199674|NT5C3B::c…
chr3:61832952-61835657	2705	genebody_intron	PTPRG	1.89	3.28	3.12	1.03	0.15	4.05	1.63	0.58	1.48	3.58	3.23	2.02	2.56	3.41	1.39	0.65	1.3	2.93	1.55	1.65	4.53	2.47	12.15	14.93
chr10:135207037-135208716	1679	promotor	MTG1	0.11	-0.29	2.65	1.25	0.83	2.65	2.09	0.24	1.33	2.3	-0.1	-0.26	-0.11	0.37	0.47	0.35	0.08	0.01	22.26	21.08	11.51	4.9	7.52	13.06	MTG1	CALY|FUOM|ADAM8|ECHS1|CYP2E1|TUBGCP2		VENTX	UTF1::chr10:135043777/+:0000163260|CALY::chr10:135150474/-:-000056563|CALY::chr10:135142512/-:-000064525|ZNF511::chr10:135122392/+:0000084645|FUOM::chr10:135170965/-:-000036072|FUOM::chr10:135171528/-:-000035509|PAOX::chr10:135192740/+:0000014297|SPRN::chr10:135238120/-:0000029404|SPRN::chr10:135237200/-:0000028484|CYP2E1::chr10:135340866/+:-000132150|MTG1::chr10:135207620/+:0000000000|SYCE1::chr…
chr2:239468635-239479002	10367	3 prime	ASB1|TRAF3IP1	5.17	0.72	2.63	1.57	-0.29	-0.56	2.3	1.34	0.84	1.19	1.27	0.72	-0.32	-0.97	1.06	1.99	0.4	-0.05	-0.74	-1.03	3.81	5.48	-0.39	-0.61					ASB1::chr2:239335625/+:0000133010
chr15:45878029-45881814	3785	promotor	BLOC1S6	0.92	-0.05	4.52	3.94	2.47	2.92	3.47	1.42	2.32	2.22	0.12	1.35	1.33	1.42	0.56	1.58	1.03	0.82	51.37	39.34	23.71	21.25	17.5	18.17	BLOC1S6	SQRDL|SLC30A4			BLOC1S6::chr15:45879416/+:0000000000|SQRDL::chr15:45923345/+:-000041531|SQRDL::chr15:45926937/+:-000045123|SQRDL::chr15:45924124/+:-000042310|SQRDL::chr15:45951104/+:-000069290|C15orf48::chr15:45722967/+:0000155062|C15orf48::chr15:45722726/+:0000155303|SPATA5L1::chr15:45694518/+:0000183511|SLC30A4::chr15:45814665/-:-000063364|SLC30A4::chr15:45815001/-:-000063028
chr15:82439111-82439698	587	enhancer	SAXO2|MEX3B	0.22	1.07	0.4	0.38	0.6	0.09	0.55	0.38	0.52	0.18	1.23	2.26	1.53	1.14	0.31	0.52	0.34	0.29	0.18	-0.03	0.32	1.62	0.42	0.28		SAXO2|MEX3B			SAXO2::chr15:82555151/+:-000115453|EFTUD1::chr15:82554137/-:0000114439|EFTUD1::chr15:82555103/-:0000115405|MEX3B::chr15:82338483/-:-000100628
chr11:27527262-27536717	9455	promotor	LIN7C	1.47	0.87	4.36	4.23	1.91	2.02	2.7	1.37	2.37	2.3	6.02	5.51	3.56	3.1	0.68	1.96	0.19	0.92	65.97	54.37	16.81	13.41	8.68	11.33	LIN7C	LGR4|CCDC34			LGR4::chr11:27494333/-:-000032929|BDNF::chr11:27723179/-:0000186462|BDNF::chr11:27680472/-:0000143755|BDNF::chr11:27695888/-:0000159171|BDNF::chr11:27721213/-:0000184496|BDNF::chr11:27722599/-:0000185882|BDNF::chr11:27722034/-:0000185317|BDNF::chr11:27722446/-:0000185729|BDNF::chr11:27681195/-:0000144478|BDNF::chr11:27680131/-:0000143414|BDNF::chr11:27681818/-:0000145101|BDNF::chr11:27723179/-:00…
chr11:534106-536765	2659	promotor	HRAS|LRRC56	2.22	0.42	4.74	2.7	2.2	2.65	1.88	1.9	1.94	2.21	-0.77	-0.45	-0.68	-0.72	-0.06	0.13	0.08	-0.35	55.36	43.45	21.92	12.95	14.02	20.33	HRAS|LRRC56	ANO9|TMEM80|PHRF1|RASSF7|RNH1|SIGIRR|EPS8L2		IRF7|DEAF1	B4GALNT4::chr11:369794/+:0000164312|PTDSS2::chr11:450279/+:0000083827|IRF7::chr11:615998/-:0000079233|IRF7::chr11:615727/-:0000078962|IRF7::chr11:615646/-:0000078881|ANO9::chr11:442010/-:-000092096|PHRF1::chr11:576445/+:-000039680|PHRF1::chr11:581491/+:-000044726|HRAS::chr11:534374/-:0000000000|HRAS::chr11:535549/-:0000000000|DEAF1::chr11:695753/-:0000158988|CDHR5::chr11:625066/-:0000088301|RASSF…
chr12:67905602-67911540	5938	enhancer	DYRK2	2.67	0.23	1.84	0.98	0.54	-0.2	1.97	0.4	0.88	0.48	2.95	4.99	2.89	1.91	1.35	0.81	0.69	0.51	0.52	-0.14	-0.09	0.42	-0.2	-0.84		DYRK2	DYRK2		DYRK2::chr12:68050885/+:-000139345|DYRK2::chr12:68042511/+:-000130971
chr4:40023595-40024921	1326	enhancer	RHOH|PDS5A|N4BP2	0.62	2.05	1.6	1.06	-0.01	0.67	1.11	0.69	1.08	1.82	4.95	5.3	3.09	4.97	0.39	0.68	0.31	0.8	-0.39	-0.19	2.55	1.84	0.52	1.14		RHOH|PDS5A|N4BP2			RHOH::chr4:40198720/+:-000173799|RHOH::chr4:40195268/+:-000170347|RHOH::chr4:40202131/+:-000177210|RHOH::chr4:40198526/+:-000173605|RHOH::chr4:40214283/+:-000189362|RHOH::chr4:40194586/+:-000169665|RHOH::chr4:40192630/+:-000167709|RHOH::chr4:40219766/+:-000194845|RHOH::chr4:40198740/+:-000173819|RHOH::chr4:40198720/+:-000173799|RHOH::chr4:40195268/+:-000170347|RHOH::chr4:40202131/+:-000177210|RHO…
chr5:41868957-41872794	3837	promotor	OXCT1	1.46	1.2	5.21	3.04	1.79	3.77	2.65	2.48	1.97	3.2	1.72	0.6	-0.28	1.27	0.18	1.29	0.24	1.02	44.45	38.81	16.21	9.19	9.95	18.02	OXCT1	FBXO4			OXCT1::chr5:41870790/-:0000000000|FBXO4::chr5:41925353/+:-000052559|FBXO4::chr5:41925355/+:-000052561
chrX:49125076-49127228	2152	promotor	FOXP3|PPP1R3F	-0.03	-0.24	2.41	1.24	0.73	1.98	2.19	0.36	0.97	1.5	0.33	0.62	0.91	0.86	0.22	1.15	0.16	0.4	14.45	10.98	13.67	9	8.03	14.03	FOXP3|PPP1R3F	FOXP3|PRAF2|GPKOW|GAGE8|PRICKLE3|WDR45|GAGE5|GAGE4|CACNA1F|GAGE6|GAGE12G|PPP1R3F|GAGE2D|GAGE2E|GAGE2A|GAGE2B|GAGE2C|GAGE12H|GAGE12I|GAGE12J|GAGE12B|GAGE7|GAGE12D|GAGE12E|GAGE12F|GAGE12C|GAGE10|GAGE13|SYP		FOXP3	FOXP3::chrX:49114983/-:-000010093|FOXP3::chrX:49121287/-:-000003789|CCDC22::chrX:49091926/+:0000033150|PRAF2::chrX:48931703/-:-000193373|GAGE7::chrX:49217762/+:-000090534|GAGE7::chrX:49216677/+:-000089449|PLP2::chrX:49028183/+:0000096893|GPKOW::chrX:48980150/-:-000144926|GAGE8::chrX:49216658/+:-000089430|GAGE8::chrX:49207159/+:-000079931|GAGE8::chrX:49189207/+:-000061979|GAGE8::chrX:49236822/+:-0…
chr1:27815918-27817812	1894	promotor	WASF2	0.65	0.85	4.89	3.08	2.15	2.14	1.95	1.39	1.34	2.37	1.09	1.8	1.23	1.46	0.47	0.3	0.28	0.17	22.62	19.54	27.46	24.35	18.22	18.69	WASF2	FCN3|WASF2|CD164L2|MAP3K6	MAP3K6|FGR		FCN3::chr1:27701314/-:-000114604|GPR3::chr1:27719147/+:0000096771|GPR3::chr1:27720297/+:0000095621|SYTL1::chr1:27671787/+:0000144131|SYTL1::chr1:27668482/+:0000147436|WASF2::chr1:27755442/-:-000060476|WASF2::chr1:27816697/-:0000000000|WASF2::chr1:27755442/-:-000060476|WASF2::chr1:27816697/-:0000000000|IFI6::chr1:27995856/-:0000178044|IFI6::chr1:27998723/-:0000180911|CD164L2::chr1:27709822/-:-0001…
chr8:85985048-85990081	5033	enhancer	LRRCC1|E2F5|CA13	0.86	0.53	4.12	5.45	1.49	0.29	0.8	3.12	1.29	0.34	20.87	43.72	25.27	18.52	1.2	4.84	2.25	2.01	-0.65	-0.56	10	26.29	2.04	1.16		LRRCC1|E2F5|CA13		E2F5	LRRCC1::chr8:86019322/+:-000029241|E2F5::chr8:86114381/+:-000124300|E2F5::chr8:86115328/+:-000125247|E2F5::chr8:86089618/+:-000099537|E2F5::chr8:86099909/+:-000109828|E2F5::chr8:86114381/+:-000124300|E2F5::chr8:86115328/+:-000125247|E2F5::chr8:86089618/+:-000099537|E2F5::chr8:86099909/+:-000109828|CA13::chr8:86157715/+:-000167634|C8orf59::chr8:86132650/-:0000142569|C8orf59::chr8:86129730/-:000013…
chr11:10476194-10477168	974	promotor	AMPD3	0.76	0.26	0.13	0.05	0.47	0.68	0.65	0.09	0.71	0.94	0.32	1.11	1.08	1.05	0.1	0.48	0.57	0.49	1.01	1.48	0.76	1.81	2.56	1.77	AMPD3	AMPD3|SBF2			SBF2::chr11:10315753/-:-000160441|MRVI1::chr11:10673728/-:0000196560|MRVI1::chr11:10651257/-:0000174089|MRVI1::chr11:10653607/-:0000176439|MRVI1::chr11:10649309/-:0000172141|MRVI1::chr11:10673847/-:0000196679|MRVI1::chr11:10650374/-:0000173206|MRVI1::chr11:10648129/-:0000170961|MRVI1::chr11:10649306/-:0000172138|MRVI1::chr11:10649571/-:0000172403|MRVI1::chr11:10655617/-:0000178449|LYVE1::chr11:10…
chr5:78530959-78533562	2603	promotor	JMY	-0.18	0.18	2.41	2.03	0.95	1.08	1.81	1.12	2.27	2.11	1.97	3.01	2.05	3.03	0.6	0.77	0.76	-0.2	45.1	33.63	8.16	5.42	4.88	4.6	JMY	DMGDH			JMY::chr5:78531924/+:0000000000|BHMT2::chr5:78365546/+:0000165413|BHMT::chr5:78407603/+:0000123356|DMGDH::chr5:78365496/-:-000165463
chr4:113810297-113811371	1074	enhancer	ANK2	0.21	0.34	0.91	0.39	-0.09	0	0.19	0.23	0.02	0.26	5.54	5.12	2.69	2.87	0.38	-0.01	0.04	0.01	0.71	0.04	0.76	0.73	0.31	0.16		ANK2			ANK2::chr4:113739238/+:0000071059|ANK2::chr4:113970784/+:-000159413|ANK2::chr4:113825610/+:-000014239|ANK2::chr4:113739238/+:0000071059|ANK2::chr4:113970784/+:-000159413|ANK2::chr4:113825610/+:-000014239|ANK2::chr4:113739238/+:0000071059|ANK2::chr4:113970784/+:-000159413|ANK2::chr4:113825610/+:-000014239
chr1:93249496-93251602	2106	enhancer	RPL5	-0.47	-0.79	2.4	1.51	0.81	1.12	2.35	1.06	0.96	1.71	0.27	0.1	-0.15	0.05	0.4	1.34	0.43	0.22	30.72	23.51	12.88	7.67	6.39	9.85		RPL5			FAM69A::chr1:93341986/-:0000090384|FAM69A::chr1:93342706/-:0000091104|FAM69A::chr1:93427078/-:0000175476|FAM69A::chr1:93341986/-:0000090384|FAM69A::chr1:93342706/-:0000091104|FAM69A::chr1:93427078/-:0000175476|RPL5::chr1:93297593/+:-000045991|EVI5::chr1:93257960/-:0000006358
chr17:66787898-66789510	1612	enhancer	FAM20A	0.19	0.63	0.33	1.36	1.14	0.73	0.37	0.53	0.67	0.27	8.87	19.18	18.01	10.94	0.65	0.59	0.93	0.92	-0.17	0.12	0.05	1.52	3	1.29		FAM20A			FAM20A::chr17:66597094/-:-000190804|ABCA8::chr17:66938179/-:0000148669|ABCA8::chr17:66945612/-:0000156102|ABCA8::chr17:66951532/-:0000162022
chr8:129895082-129896256	1174	other		0.98	0.56	1.92	1.54	0.95	0.31	0.66	0.68	0.68	0.73	1.93	3.58	2.76	2.11	0.4	0.59	0.42	0.15	-0.2	-0.12	1.58	1.98	1.55	0.25
chr9:75123353-75125118	1765	enhancer	ZFAND5|TMC1	0.27	1.53	1.06	0.52	0.97	0.52	0.29	0.35	0.83	0.38	1.51	2.32	3	1.76	0.13	0.72	0.64	0.72	-0.27	-0.15	1.52	3.2	3.46	1.43		ZFAND5|TMC1			ZFAND5::chr9:74975702/-:-000147651|ZFAND5::chr9:74980162/-:-000143191|ZFAND5::chr9:74978521/-:-000144832|ZFAND5::chr9:74975699/-:-000147654|ZFAND5::chr9:74979507/-:-000143846|TMC1::chr9:75231283/+:-000106165|TMC1::chr9:75263512/+:-000138394|TMC1::chr9:75192817/+:-000067699|TMC1::chr9:75242836/+:-000117718|TMC1::chr9:75136716/+:-000011598|TMC1::chr9:75231283/+:-000106165|TMC1::chr9:75263512/+:-000…
chr5:153262894-153285281	22387	enhancer	MFAP3	7.13	5.15	31.01	2.24	1.09	11.81	10.7	3.21	5.33	11.69	7.94	5.34	4.52	6.63	1.55	2.27	1.51	2.91	-2.18	-2.45	31.14	20.35	17.05	14.29		MFAP3			FAM114A2::chr5:153418496/-:0000133215|FAM114A2::chr5:153414526/-:0000129245|MFAP3::chr5:153418518/+:-000133237|MFAP3::chr5:153432479/+:-000147198|MFAP3::chr5:153429116/+:-000143835
chr6:56299906-56300820	914	enhancer	COL21A1	0.05	-0.1	0.49	0.11	0.06	-0.07	0.14	-0.25	-0.03	0.07	1.08	0.87	0.13	0.4	0.17	0.23	0.14	0.29	0.01	-0.1	0.18	0.31	-0.19	-0.09		COL21A1			COL21A1::chr6:56112377/-:-000187529|COL21A1::chr6:56112377/-:-000187529
chr8:90769050-90770983	1933	promotor	RIPK2	-0.55	-0.24	2.99	2.81	1.98	2.37	1.39	2.37	2.09	2.61	1.77	2.36	2.38	2.27	0.97	1.26	0.59	0.85	42.08	31.87	14.23	11.88	12.56	11.48	RIPK2	OSGIN2	RIPK2		OSGIN2::chr8:90914095/+:-000143112|OSGIN2::chr8:90921794/+:-000150811|OSGIN2::chr8:90914761/+:-000143778|RIPK2::chr8:90769974/+:0000000000
chr2:164733396-164734698	1302	enhancer	FIGN	0.5	0.14	1.84	0.62	-0.11	0.52	1.01	0.36	0.28	-0.16	0.82	0.89	0.37	-0.03	0.52	0.43	-0.05	-0.13	-0.04	-0.23	3.85	4.35	1.57	0.61		FIGN			FIGN::chr2:164592512/-:-000140884|FIGN::chr2:164591581/-:-000141815
chr1:209861796-209862620	824	promotor	HSD11B1	0.07	0.83	0.33	0.79	0.69	0.54	-0.11	0.26	1.06	0.6	0.47	1.52	2.26	0.67	0.26	0.31	0.85	0.95	0	0.11	-0.12	0.21	1.07	0.34	HSD11B1	DIEXF|TRAF3IP3|LAMB3|HSD11B1	CAMK1G	IRF6	G0S2::chr1:209848997/+:0000012799|G0S2::chr1:209848669/+:0000013127|IRF6::chr1:209969896/-:0000107276|IRF6::chr1:209974760/-:0000112140|IRF6::chr1:209975387/-:0000112767|IRF6::chr1:209979519/-:0000116899|CAMK1G::chr1:209768299/+:0000093497|CAMK1G::chr1:209757044/+:0000104752|DIEXF::chr1:210001311/+:-000138691|TRAF3IP3::chr1:209948693/+:-000086073|TRAF3IP3::chr1:209941832/+:-000079212|TRAF3IP3::ch…
chr1:62694247-62707754	13507	enhancer	USP1	20.35	11.09	5.23	6.8	2.17	1.02	2.86	3.76	1.22	0.16	10.74	19.21	9.7	7.17	2.42	5.15	2.47	0.67	1.39	0.19	23.93	46.11	10.88	4.13		USP1			USP1::chr1:62905469/+:-000197715|USP1::chr1:62902382/+:-000194628|USP1::chr1:62901974/+:-000194220|KANK4::chr1:62785082/-:0000077328|KANK4::chr1:62747305/-:0000039551|L1TD1::chr1:62672190/+:0000022057|L1TD1::chr1:62660473/+:0000033774|L1TD1::chr1:62669118/+:0000025129|L1TD1::chr1:62662106/+:0000032141
chr6:159062709-159088973	26264	promotor	DYNLT1|SYTL3	18.57	16.9	14.56	8.85	7.74	9.6	8.38	4.76	5.49	8.88	26.84	31.25	26.99	26.98	3.24	2.86	3.05	5.84	45.58	37.24	60.94	36.82	45.12	47.11	DYNLT1|SYTL3				TMEM181::chr6:158957467/+:0000105242|DYNLT1::chr6:159065817/-:0000000000|SYTL3::chr6:159082300/+:0000000000|SYTL3::chr6:159071045/+:0000000000|SYTL3::chr6:159072784/+:0000000000|SYTL3::chr6:159084236/+:0000000000|SYTL3::chr6:159083781/+:0000000000|EZR::chr6:159239339/-:0000150366|EZR::chr6:159240455/-:0000151482|EZR::chr6:159239197/-:0000150224
chr10:104209289-104221646	12357	promotor	TMEM180|C10orf95	12.01	10.41	5.6	5.61	2.74	5.24	3.27	2.07	3.93	5.37	7.29	13.46	12.74	8.67	0.67	1.9	0.67	0.34	40.32	37.41	25.09	33.46	23.44	24.34	TMEM180|C10orf95	CUEDC2|PSD|TRIM8|TMEM180|SUFU		NFKB2	CUEDC2::chr10:104192422/-:-000016867|CUEDC2::chr10:104184954/-:-000024335|PSD::chr10:104176387/-:-000032902|PSD::chr10:104178515/-:-000030774|PSD::chr10:104179483/-:-000029806|PSD::chr10:104179690/-:-000029599|PSD::chr10:104176877/-:-000032412|PSD::chr10:104173953/-:-000035336|PSD::chr10:104175875/-:-000033414|PSD::chr10:104178900/-:-000030389|PSD::chr10:104174985/-:-000034304|TRIM8::chr10:104404…
chr1:200637681-200640417	2736	promotor	DDX59	-0.53	0	4.78	3.98	2.55	4.67	2.34	1.35	3.11	3.86	1.71	4.7	3.69	4.39	0.43	0.37	0.63	1.21	22.1	16.14	22.07	18.1	18.63	25.09	DDX59	KIF14|CAMSAP2			CAMSAP2::chr1:200708685/+:-000068268|KIF14::chr1:200587965/-:-000049716|KIF14::chr1:200589861/-:-000047820|DDX59::chr1:200635878/-:-000001803|DDX59::chr1:200639125/-:0000000000
chr11:863381-864175	794	promotor	TSPAN4	1	0.31	0.15	0.32	0.3	0.55	0.34	-0.07	0.41	0.71	-0.24	-0.1	-0.11	0.12	0.14	-0.05	0.27	0.28	0	-0.12	0.04	-0.1	0	0.14	TSPAN4	DEAF1|PIDD1|SLC25A22|AP2A2|PDDC1|POLR2L|CEND1		DEAF1	RPLP2::chr11:810233/+:0000053148|RPLP2::chr11:809935/+:0000053446|TMEM80::chr11:695590/+:0000167791|PNPLA2::chr11:819573/+:0000043808|PNPLA2::chr11:818900/+:0000044481|EPS8L2::chr11:709329/+:0000154052|EPS8L2::chr11:706119/+:0000157262|PANO1::chr11:797510/+:0000065871|TALDO1::chr11:747431/+:0000115950|DEAF1::chr11:695753/-:-000167628|MUC6::chr11:1036705/-:0000172530|PIDD1::chr11:804462/-:-0000589…
chr20:10599805-10600970	1165	enhancer	MKKS	1.81	1.3	0.57	0.52	0.27	0.86	0.21	0.38	0.89	0.65	0.75	0.71	1.04	0.86	0.24	0.52	0.41	0.25	0.31	0.35	0.92	1.97	2.39	1.37		MKKS			SLX4IP::chr20:10438823/+:0000160982|SLX4IP::chr20:10415950/+:0000183855|MKKS::chr20:10414886/-:-000184919|MKKS::chr20:10401405/-:-000198400|MKKS::chr20:10412572/-:-000187233|MKKS::chr20:10414886/-:-000184919|MKKS::chr20:10401405/-:-000198400|MKKS::chr20:10412572/-:-000187233|JAG1::chr20:10654693/-:0000053723
chr6:46404827-46406256	1429	enhancer	RCAN2	1.34	0.49	1.36	0.84	0.32	0.02	0.62	0.64	-0.18	-0.23	3.5	6.48	2.74	2.11	0.59	0.93	0.07	0.31	0.56	-0.19	3.56	6.09	0.54	-0.05		RCAN2			RCAN2::chr6:46459803/-:0000053547|RCAN2::chr6:46459059/-:0000052803|RCAN2::chr6:46293628/-:-000111199|RCAN2::chr6:46424714/-:0000018458|RCAN2::chr6:46459803/-:0000053547|RCAN2::chr6:46459059/-:0000052803|RCAN2::chr6:46293628/-:-000111199|RCAN2::chr6:46424714/-:0000018458|CYP39A1::chr6:46605714/-:0000199458
chr13:44452657-44454246	1589	promotor	LACC1|CCDC122	1.32	1.38	2.17	1.46	0.86	1.63	1.9	1.28	1.82	1.91	1.39	1.74	1.22	1.5	0.5	0.58	0.53	0.41	12.47	9.03	9.45	7.89	8.64	8.74	LACC1|CCDC122	ENOX1|CCDC122			ENOX1::chr13:44361115/-:-000091542|ENOX1::chr13:44361115/-:-000091542|LACC1::chr13:44455087/+:-000000841|LACC1::chr13:44453968/+:0000000000|LACC1::chr13:44453419/+:0000000000|CCDC122::chr13:44453825/-:0000000000|CCDC122::chr13:44443624/-:-000009033|CCDC122::chr13:44449062/-:-000003595
chr16:85524388-85527024	2636	enhancer	GSE1	6.78	1.69	5.97	4.23	0.65	0.91	3.17	2.37	0.91	0.8	3.34	6.81	2.81	1.52	1.73	2.11	0.61	-0.07	2.22	0.59	19.73	30	2.66	1.43		GSE1			GINS2::chr16:85722587/-:0000195563|GSE1::chr16:85682157/+:-000155133|GSE1::chr16:85646841/+:-000119817|GSE1::chr16:85645028/+:-000118004
chr20:50807315-50809302	1987	promotor	ZFP64	0.01	-0.15	4.13	3.15	2.4	2.86	2.52	1.61	2.92	2.43	0.24	0.48	0.9	0.93	0.86	1.1	1.15	0.96	40.06	29.72	17.33	15.76	15.6	14.37	ZFP64			ZFP64	ZFP64::chr20:50808523/-:0000000000
chr4:130774007-130775503	1496	other		-0.09	-0.06	1.4	0.68	0.12	0.89	-0.08	0.66	0.25	0.24	0.27	0.81	0.26	-0.06	0.05	0.13	0.43	0.27	4.35	1.96	2.85	6.01	3	2.09
chr2:189437147-189446121	8974	genebody_intron	GULP1	-1.38	-0.99	4.36	1.34	-0.28	-0.5	0.28	-0.16	-0.99	-0.79	4.64	2.96	0	0.53	0.59	0.96	0.27	0.51	-1.68	-2.09	2.02	1.16	-1.59	-1.78					DIRC1::chr2:189599675/-:0000153554|DIRC1::chr2:189599675/-:0000153554|GULP1::chr2:189248489/+:0000188658|GULP1::chr2:189342385/+:0000094762|GULP1::chr2:189248489/+:0000188658|GULP1::chr2:189342385/+:0000094762
chr4:147878019-147879044	1025	enhancer	TTC29	0.59	0.55	0.1	0.17	0.63	1.05	-0.22	-0.1	0.7	1.03	0.18	1.78	2.07	1.22	-0.12	0.27	0.89	1.06	-0.65	-0.24	-0.09	0.28	3.16	1.09		TTC29			TTC29::chr4:147863835/-:-000014184|TTC29::chr4:147861052/-:-000016967|TTC29::chr4:147867033/-:-000010986|TTC29::chr4:147866228/-:-000011791
chr6:131883223-131883803	580	enhancer	ARG1|ENPP3	-0.13	0.09	0.21	0.53	0.18	0.09	-0.01	0.11	0.18	0.24	1.83	3.81	2.99	1.66	0.25	0.27	0.08	0.11	0.13	0.07	-0.1	-0.04	0.13	0.05		ARG1|ENPP3			ARG1::chr6:131894343/+:-000010540|MED23::chr6:131949378/-:0000065575|ENPP3::chr6:131958441/+:-000074638
chr2:233890048-233891044	996	enhancer	INPP5D|NGEF	2.16	0.61	0.28	1.17	0.27	0.3	0.62	0.67	0.57	0.24	3.1	4.12	2.13	1.57	0.51	0.29	0.05	0.4	-0.09	-0.13	0.18	-0.01	0.02	0.05		INPP5D|NGEF			NGEF::chr2:233877950/-:-000012098|NGEF::chr2:233839673/-:-000050375|NGEF::chr2:233792860/-:-000097188|NGEF::chr2:233877950/-:-000012098|NGEF::chr2:233839673/-:-000050375|NGEF::chr2:233792860/-:-000097188|C2orf82::chr2:233734993/+:0000155055|INPP5D::chr2:233924676/+:-000033632
chr1:12609140-12619812	10672	enhancer	AADACL3|C1orf158	11.98	6.19	5.17	3.91	1.07	1.33	1.84	1.68	1.77	1.84	10.07	9.64	5.85	5.02	2.38	3.49	1.1	1.58	1.7	0.94	6.15	0.83	-1.21	-0.44		AADACL3|C1orf158			DHRS3::chr1:12677736/-:0000057924|AADACL3::chr1:12776117/+:-000156305|C1orf158::chr1:12806133/+:-000186321
chr1:70202914-70203963	1049	enhancer	LRRC7	0.07	-0.18	0.82	1.13	0.29	0.36	0.48	0.3	0.3	0.37	2.08	2.17	1.34	1.32	0.56	0.54	0.64	0.49	-0.06	-0.11	1.26	2.12	1.15	0.34		LRRC7			LRRC7::chr1:70225857/+:-000021894
chr11:8625109-8626833	1724	enhancer	RPL27A|STK33	1.76	1.62	2.6	2.77	1.18	0.77	2	1.17	1.1	1.8	8.69	13.07	12.69	11.11	0.6	1.43	1.01	0.71	0.65	0.61	5.49	9.22	2.8	1.04		RPL27A|STK33	STK33		ST5::chr11:8772271/-:0000145438|ST5::chr11:8772271/-:0000145438|RPL27A::chr11:8703994/+:-000077161|STK33::chr11:8483455/-:-000141654|STK33::chr11:8496362/-:-000128747|STK33::chr11:8479025/-:-000146084|STK33::chr11:8486368/-:-000138741|STK33::chr11:8588839/-:-000036270|STK33::chr11:8615554/-:-000009555|STK33::chr11:8555042/-:-000070067|STK33::chr11:8496612/-:-000128497|STK33::chr11:8615835/-:-0000…
chr1:238838263-238839936	1673	other		-0.46	-0.54	1.29	0.11	-0.24	-0.21	0.25	-0.24	-0.01	0.03	0.68	0.37	0.08	-0.21	0.76	0.29	0.02	-0.08	0.73	-0.24	1.6	0.78	-0.19	-0.26
chr3:179244384-179245415	1031	enhancer	GNB4|NDUFB5|USP13|ACTL6A	0.26	0.34	0.71	0.31	0.16	0.27	0.31	0.23	0.19	0.11	0.75	0.63	0.85	0.4	0.23	0.16	0.3	0.63	0.05	0.02	0.55	0.45	0.31	0.31		GNB4|NDUFB5|USP13|ACTL6A		ZNF639	ZNF639::chr3:179045348/+:0000199036|ZNF639::chr3:179046070/+:0000198314|GNB4::chr3:179144029/-:-000100355|GNB4::chr3:179169370/-:-000075014|NDUFB5::chr3:179322574/+:-000077159|USP13::chr3:179370932/+:-000125517|MFN1::chr3:179066632/+:0000177752|MFN1::chr3:179065479/+:0000178905|MRPL47::chr3:179322433/-:0000077018|MRPL47::chr3:179319577/-:0000074162|MRPL47::chr3:179316558/-:0000071143|ACTL6A::chr3…
chr4:170885265-170908164	22899	genebody_exon	LOC100506085	6.02	4.89	1.91	7.16	2.76	0.15	3.99	3.29	3.62	0.74	7.31	14.26	9.24	2.83	1.93	5.66	4.03	1.59	-4.39	-3.94	3.03	21.49	4.62	-1.11					MFAP3L::chr4:170927160/-:0000018996|MFAP3L::chr4:170913459/-:0000005295|MFAP3L::chr4:170923376/-:0000015212|MFAP3L::chr4:170947580/-:0000039416|MFAP3L::chr4:170924942/-:0000016778|AADAT::chr4:171011371/-:0000103207|AADAT::chr4:171011182/-:0000103018|AADAT::chr4:171011537/-:0000103373|AADAT::chr4:171010886/-:0000102722
chr1:83647257-83648681	1424	other		-0.16	0.07	1.54	1.6	0.72	1.05	0.77	0.69	0.61	0.86	0.62	1.6	1.02	0.9	0.18	0.64	0.46	0.49	2.41	2.07	4.89	9.97	6.81	4.17
chr14:64904690-64912750	8060	enhancer	AKAP5|ZBTB1|ESR2|HSPA2|PPP1R36	2.95	2.33	5.94	2.66	0.2	-0.42	2.24	2.12	0.97	0.16	7.9	11.9	4.03	2.23	1.09	1.42	0.45	-0.13	-0.47	-0.32	25.96	37.33	6.01	1.85		AKAP5|ZBTB1|ESR2|HSPA2|PPP1R36		ZBTB1|ESR2|ZBTB25	AKAP5::chr14:64932216/+:-000019466|AKAP5::chr14:64934849/+:-000022099|ZBTB1::chr14:64971291/+:-000058541|ZBTB1::chr14:64988204/+:-000075454|ESR2::chr14:64803437/-:-000101253|ESR2::chr14:64770376/-:-000134314|ESR2::chr14:64768297/-:-000136393|ESR2::chr14:64749792/-:-000154898|ESR2::chr14:64805267/-:-000099423|ESR2::chr14:64765201/-:-000139489|ESR2::chr14:64761127/-:-000143563|ESR2::chr14:64764435/…
chr10:61468718-61470018	1300	promotor	SLC16A9	2.34	1.16	0.6	0.48	0.63	1.15	0.34	0.14	0.75	0.88	1.09	2.29	3.06	1.71	0.21	0.17	0.4	0.39	18.38	11.28	1.01	0.99	1.47	2.62	SLC16A9	SLC16A9			SLC16A9::chr10:61469648/-:0000000000|SLC16A9::chr10:61444084/-:-000024634|MRLN::chr10:61498319/-:0000028301|MRLN::chr10:61498876/-:0000028858|MRLN::chr10:61496977/-:0000026959|MRLN::chr10:61513202/-:0000043184|MRLN::chr10:61498319/-:0000028301|MRLN::chr10:61498876/-:0000028858|MRLN::chr10:61496977/-:0000026959|MRLN::chr10:61513202/-:0000043184|CCDC6::chr10:61666413/-:0000196395
chr16:122487-129125	6638	promotor	MPG|RHBDF1	13.92	6.83	6.62	3.51	3.67	5.33	4.13	2.37	4.33	5.7	6.23	12.65	13.98	9.33	0.51	1.9	1.14	0.91	30.33	28.4	44.71	35.61	43.47	45.4	MPG|RHBDF1	HBM|ITFG3|HBQ1|RHBDF1|HBZ|HBA1|HBA2|POLR3K			HBM::chr16:215972/+:-000086847|MPG::chr16:129423/+:-000000298|MPG::chr16:127017/+:0000000000|MPG::chr16:129137/+:-000000012|MPG::chr16:128168/+:0000000000|ITFG3::chr16:299547/+:-000170422|ITFG3::chr16:304379/+:-000175254|ITFG3::chr16:304386/+:-000175261|ITFG3::chr16:284544/+:-000155419|ITFG3::chr16:299547/+:-000170422|ITFG3::chr16:304379/+:-000175254|ITFG3::chr16:304386/+:-000175261|ITFG3::chr16:…
chr12:45677505-45690634	13129	promotor	ANO6	12.9	6.46	5.53	4.41	1.5	1.03	0.83	2.17	3.31	1.24	6.26	8.23	5.53	4.16	2.61	3.66	1.26	1.58	1.35	-0.15	23.12	27.21	12.64	6.79	ANO6				ANO6::chr12:45609769/+:0000067736|ANO6::chr12:45686465/+:0000000000
chr6:22470423-22472093	1670	enhancer	PRL|HDGFL1	0.64	0.78	1.91	1.89	0.7	1.37	0.88	0.7	0.73	0.81	0.48	1.95	0.99	0.48	0.43	1.2	0.65	0.56	0.85	0.52	0.79	2.76	1.69	0.51		PRL|HDGFL1			PRL::chr6:22303081/-:-000167342|PRL::chr6:22297307/-:-000173116|PRL::chr6:22297729/-:-000172694|PRL::chr6:22303081/-:-000167342|PRL::chr6:22297307/-:-000173116|PRL::chr6:22297729/-:-000172694|HDGFL1::chr6:22569677/+:-000097584
chr5:66688240-66702276	14036	enhancer	CD180	-5.45	-3.18	4.75	-1.89	-2.44	7.31	-0.9	-1.54	-2.44	-0.08	0.04	-1.47	-1.57	0.53	-0.52	-0.55	-1.01	0.15	-9.53	-7.58	3.07	-0.35	5.13	17.54		CD180			CD180::chr5:66492616/-:-000195624
chr9:80892752-80913010	20258	promotor	PSAT1	5.19	0.14	4.75	4.5	1.56	1.8	6.93	3.87	1.14	2.97	19.72	23.67	12.54	12.57	3.05	3.69	0.41	0.31	29.17	23.4	10.06	2.97	0.89	10.93	PSAT1				PSAT1::chr9:80911990/+:0000000000|CEP78::chr9:80850990/+:0000041762
chr11:61811793-61822674	10881	enhancer	RAB3IL1|INCENP|SCGB2A1|SCGB1D2|SCGB1D1|FADS3|FTH1	2.86	1.97	1.91	4.59	3.52	-0.04	1.96	5.53	7.72	1.21	2.65	10.01	7.41	3.72	-0.16	4.34	2.37	0.63	-2.06	-1.63	4.14	16.1	16.44	2.42		RAB3IL1|INCENP|SCGB2A1|SCGB1D2|SCGB1D1|FADS3|FTH1			INCENP::chr11:61891444/+:-000068770|INCENP::chr11:61895622/+:-000072948|RAB3IL1::chr11:61685080/-:-000126713|RAB3IL1::chr11:61687740/-:-000124053|SCGB1D1::chr11:61957709/+:-000135035|SCGB1D2::chr11:62009723/+:-000187049|SCGB2A1::chr11:61976139/+:-000153465|BEST1::chr11:61719242/+:0000092551|BEST1::chr11:61717355/+:0000094438|BEST1::chr11:61722578/+:0000089215|FTH1::chr11:61735131/-:-000076662|FAD…
chr1:1259526-1296803	37277	promotor	CPSF3L|CPTP|MXRA8|DVL1	50.46	24.91	13.95	7.12	14.19	10.32	15.18	7.06	10.83	16.21	0.24	-0.68	-0.65	1.36	3.68	4.53	3.17	3.52	87.83	72.54	96.43	60.72	74.33	67.69	CPSF3L|CPTP|MXRA8|DVL1	UBE2J2|FAM132A|TNFRSF18|SDF4|TNFRSF4|ATAD3C|ATAD3B|ATAD3A|ACAP3|VWA1			MRPL20::chr1:1342692/-:0000045889|UBE2J2::chr1:1198765/-:-000060761|UBE2J2::chr1:1209233/-:-000050293|UBE2J2::chr1:1203371/-:-000056155|UBE2J2::chr1:1198765/-:-000060761|UBE2J2::chr1:1209233/-:-000050293|UBE2J2::chr1:1203371/-:-000056155|FAM132A::chr1:1182101/-:-000077425|PUSL1::chr1:1243993/+:0000015533|TNFRSF18::chr1:1142088/-:-000117438|SDF4::chr1:1167446/-:-000092080|SDF4::chr1:1164325/-:-000…
chr17:48937295-48946471	9176	promotor	TOB1	-1.47	-0.19	19.58	16.41	5.6	5.36	9.4	8.12	7.1	4.32	3.12	5.32	2.68	2.08	1.83	2.53	1.39	0.97	73.38	48.09	66.61	55.07	33.42	32.05	TOB1	ANKRD40			WFIKKN2::chr17:48912604/+:0000024691|TOB1::chr17:48941523/-:0000000000|TOB1::chr17:48941320/-:0000000000|TOB1::chr17:48943714/-:0000000000|TOB1::chr17:48945338/-:0000000000|TOB1::chr17:48944962/-:0000000000|ANKRD40::chr17:48785269/-:-000152026|LUC7L3::chr17:48796925/+:0000140370|SPAG9::chr17:49124328/-:0000177857
chr8:32188898-32189636	738	genebody_intron	NRG1	0.15	1.33	-0.32	-0.18	0.56	0.28	0.08	-0.1	0.86	0.88	-0.02	0.75	1.42	0.87	0.08	-0.03	0.15	0.82	-0.37	-0.24	-0.44	-0.31	-0.06	-0.14
chr21:17934592-17944710	10118	other		2.26	5.51	11.41	7.29	4.87	7.81	5.11	5.7	8.73	4.31	16.26	27.32	21.27	16.82	3.46	5.68	4.23	7.17	-1.08	0.11	21.22	44.06	37.13	20.14
chr6:7697239-7699219	1980	enhancer	BMP6	0.7	2.52	3.39	3.21	2.28	1.8	0.84	1.25	1.98	1.39	26.35	40.57	37.11	34.27	0.94	2.31	1.47	2.39	3.51	3.46	7.92	14.84	11.27	6.53		BMP6			BMP6::chr6:7727010/+:-000027791|SNRNP48::chr6:7590431/+:0000106808|DSP::chr6:7541869/+:0000155370
chr12:115244328-115251695	7367	enhancer	TBX3	1.88	2.22	2.15	0.37	0.59	0.97	0.29	0.7	0.59	1.37	4.98	4.06	3.02	4.01	0.93	0.69	0.94	1.46	0.74	1.03	1.43	0.81	0.7	1.27		TBX3		TBX3	TBX3::chr12:115121968/-:-000122360
chr1:1617458-1618467	1009	promotor	SLC35E2B	1.47	1.56	0.98	1.15	0.52	0.26	0.31	0.85	1.61	0.66	4.5	6.8	5.66	4.47	0.39	0.57	0.59	0.78	0.07	-0.12	1	1.62	1.21	1.18	SLC35E2B	TMEM240|C1orf233|CDK11B|SLC35E2B|SSU72	CDK11B|CDK11A		NADK::chr1:1690080/-:0000071613|NADK::chr1:1696884/-:0000078417|NADK::chr1:1709908/-:0000091441|NADK::chr1:1710296/-:0000091829|NADK::chr1:1711507/-:0000093040|NADK::chr1:1690080/-:0000071613|NADK::chr1:1696884/-:0000078417|NADK::chr1:1709908/-:0000091441|NADK::chr1:1710296/-:0000091829|NADK::chr1:1711507/-:0000093040|ATAD3A::chr1:1451391/+:0000166067|ATAD3A::chr1:1447909/+:0000169549|ATAD3A::chr…
chr1:29240643-29241651	1008	promotor	EPB41	0.59	0.4	0.6	0.84	0.39	0.42	0.83	0.67	0.43	1.16	-0.07	0.21	0.24	-0.05	0.13	0.49	0.28	0.23	9.51	7.75	1.39	1.58	1.61	2.33	EPB41	EPB41			YTHDF2::chr1:29063451/+:0000177192|YTHDF2::chr1:29063135/+:0000177508|YTHDF2::chr1:29068914/+:0000171729|YTHDF2::chr1:29063558/+:0000177085|YTHDF2::chr1:29063132/+:0000177511|YTHDF2::chr1:29064770/+:0000175873|OPRD1::chr1:29138653/+:0000101990|EPB41::chr1:29315867/+:-000074216|EPB41::chr1:29319841/+:-000078190|EPB41::chr1:29241087/+:0000000000|EPB41::chr1:29313942/+:-000072291|EPB41::chr1:2921360…
chr3:136702883-136716565	13682	genebody_exon	IL20RB|IL20RB|IL20RB	14.57	9.31	8.24	9.02	4.81	5.68	7.31	7.05	7.64	6.84	13.17	24.58	19.72	13.49	2.67	6.29	4.53	4.2	-1.05	-1.33	21.21	47.03	29.06	14.77					SLC35G2::chr3:136537860/+:0000165023|SLC35G2::chr3:136573284/+:0000129599|IL20RB::chr3:136676706/+:0000026177|NCK1::chr3:136649316/+:0000053567|NCK1::chr3:136581049/+:0000121834|NCK1::chr3:136646825/+:0000056058|NCK1::chr3:136649316/+:0000053567|NCK1::chr3:136581049/+:0000121834|NCK1::chr3:136646825/+:0000056058
chr8:122154911-122189435	34524	other		10.15	7.99	41.05	12.9	7.69	43.25	9.78	7.39	11.99	14.52	34.5	53.59	48.38	44.12	7.92	13.06	12.87	26.87	-6.17	-4.95	51.51	57.77	65.57	74.48
chr2:181250157-181251322	1165	other		0.36	0.24	0.42	1.04	1.43	1	0.64	0.41	1.49	0.88	6.38	10.13	9.96	9.19	0.1	0.13	0.86	1.08	0.18	-0.08	-0.27	-0.16	0.37	0.02
chr14:52542736-52544006	1270	enhancer	PTGDR|NID2	0.77	0.14	1.44	1.06	0.71	0.38	0.66	0.26	0.58	1.03	5.12	6.48	5.53	4.14	0.11	0.52	0.45	0.7	-0.12	-0.12	-0.08	-0.32	-0.36	-0.4		PTGDR|NID2			PTGDR::chr14:52734430/+:-000190424|C14orf166::chr14:52456227/+:0000086509|GNG2::chr14:52417367/+:0000125369|GNG2::chr14:52344338/+:0000198398|GNG2::chr14:52344334/+:0000198402|GNG2::chr14:52417367/+:0000125369|GNG2::chr14:52344338/+:0000198398|GNG2::chr14:52344334/+:0000198402|NID2::chr14:52535945/-:-000006791
chr1:805090-805677	587	enhancer	KLHL17|AGRN|ISG15|SAMD11|PLEKHN1	0.42	0.25	0.18	0.4	0.15	0.15	0.2	0.05	0.09	0.6	0.02	0.11	0.17	0.27	0.03	0.06	0.07	0.12	0.06	0.04	0.04	-0.01	-0.04	-0.08		KLHL17|AGRN|ISG15|SAMD11|PLEKHN1		HES4	KLHL17::chr1:895966/+:-000090289|PLEKHN1::chr1:901876/+:-000096199|PERM1::chr1:916426/-:0000110749|PERM1::chr1:917496/-:0000111819|NOC2L::chr1:894678/-:0000089001|AGRN::chr1:955502/+:-000149825|ISG15::chr1:948846/+:-000143169|SAMD11::chr1:861301/+:-000055624|SAMD11::chr1:861120/+:-000055443|HES4::chr1:935551/-:0000129874
chr6:105443640-105445037	1397	enhancer	HACE1	0.33	0.4	3.9	1.42	0.14	2.5	0.65	0.55	0.57	0.82	0.35	1.08	0.85	0.76	0.39	0.78	0.48	0.32	-0.56	-0.78	5.8	7.88	2.95	2.46		HACE1		LIN28B	BVES::chr6:105584542/-:0000139505|BVES::chr6:105585048/-:0000140011|BVES::chr6:105581462/-:0000136425|BVES::chr6:105584220/-:0000139183|POPDC3::chr6:105610034/-:0000164997|POPDC3::chr6:105627857/-:0000182820|HACE1::chr6:105307793/-:-000135847|LIN28B::chr6:105404922/+:0000038718
chr5:156975227-156976227	1000	enhancer	THG1L|LSM11|C5orf52	1.06	0.12	0.39	0.97	0.22	0.07	0.48	0.26	0.02	0.03	3.68	5.46	2.13	1.82	0.23	0.39	-0.02	0.03	1.43	0.31	0.47	1.16	0.04	0.03		THG1L|LSM11|C5orf52		SOX30	SOX30::chr5:157079427/-:0000103200|NIPAL4::chr5:156887026/+:0000088201|THG1L::chr5:157158322/+:-000182095|LSM11::chr5:157170702/+:-000194475|ADAM19::chr5:157002830/-:0000026603|C5orf52::chr5:157098560/+:-000122333
chr20:51686937-51699178	12241	enhancer	TSHZ2	6.08	6.82	4.86	5.56	5.89	4.6	-0.8	1.14	5.03	0.62	7.88	15.51	20.16	11.61	0.83	4.66	6.49	4.35	-2.82	-1.36	1.18	8.37	24.74	7.23		TSHZ2			TSHZ2::chr20:51588945/+:0000097992|TSHZ2::chr20:51801821/+:-000102643|TSHZ2::chr20:51588945/+:0000097992|TSHZ2::chr20:51801821/+:-000102643
chr12:50783193-50797551	14358	promotor	LARP4|FAM186A	6.91	10.03	9.67	7.44	6.94	10.16	3.15	3.59	8.28	8.56	9.8	18.53	19	15.27	1.23	3.2	4.55	7.57	49.39	43.35	38.45	45.19	65.31	43.43	LARP4|FAM186A	LIMA1|DIP2B			LIMA1::chr12:50616487/-:-000166706|LIMA1::chr12:50642556/-:-000140637|LIMA1::chr12:50595315/-:-000187878|LIMA1::chr12:50677352/-:-000105841|LIMA1::chr12:50616487/-:-000166706|LIMA1::chr12:50642556/-:-000140637|LIMA1::chr12:50595315/-:-000187878|LIMA1::chr12:50677352/-:-000105841|DIP2B::chr12:50898767/+:-000101216|LARP4::chr12:50794591/+:0000000000|FAM186A::chr12:50790404/-:0000000000
chr17:79091834-79094250	2416	enhancer	C17orf89	3.7	1.66	0.71	1.91	2.12	0.85	0.7	0.78	0.83	0.79	-0.17	-0.38	-0.05	-0.09	0.2	0.46	0.18	0.14	9.24	7.69	4.49	1.57	2.7	3.54		C17orf89	AATK		C17orf89::chr17:79213110/+:-000118860|CEP131::chr17:79196750/-:0000102500|CEP131::chr17:79193872/-:0000099622|ENTHD2::chr17:79212890/-:0000118640|SLC38A10::chr17:79269138/-:0000174888|BAIAP2::chr17:79008946/+:0000082888|AATK::chr17:79139871/-:0000045621|AATK::chr17:79105747/-:0000011497|AATK::chr17:79105004/-:0000010754|CHMP6::chr17:78965640/+:0000126194|TMEM105::chr17:79288280/-:0000194030
chr3:196668137-196670210	2073	promotor	NCBP2	-0.9	-1.2	2.48	1.59	1.91	3.1	2.3	0.93	1.41	3.26	-0.48	0.08	0.23	0.41	-0.54	0.17	-0.33	0.65	48.37	44.85	13.9	8.09	10.52	16.67	NCBP2		PAK2		MFI2::chr3:196756685/-:0000086475|MFI2::chr3:196756686/-:0000086476|PIGZ::chr3:196695741/-:0000025531|SENP5::chr3:196594726/+:0000073411|SENP5::chr3:196612021/+:0000056116|SENP5::chr3:196594726/+:0000073411|SENP5::chr3:196612021/+:0000056116|PAK2::chr3:196509496/+:0000158641|PAK2::chr3:196509496/+:0000158641|NCBP2::chr3:196669463/-:0000000000
chr3:101497258-101500513	3255	promotor	NXPE3	-0.53	-0.04	3.21	2.36	1.71	1.41	2.76	1.84	1.94	2.31	0.41	1.07	0.49	1.24	1.14	1.4	1.03	0.56	40.83	26.19	23.29	23.29	21.88	13.58	NXPE3	NFKBIZ|RPL24|ZBTB11		ZBTB11	NFKBIZ::chr3:101548456/+:-000047943|NFKBIZ::chr3:101570928/+:-000070415|NFKBIZ::chr3:101546833/+:-000046320|NFKBIZ::chr3:101568357/+:-000067844|RPL24::chr3:101405562/-:-000091696|ZBTB11::chr3:101395987/-:-000101271|NXPE3::chr3:101498028/+:0000000000|NXPE3::chr3:101504245/+:-000003732|NXPE3::chr3:101498285/+:0000000000|NXPE3::chr3:101500953/+:-000000440|NXPE3::chr3:101501503/+:-000000990|NXPE3::ch…
chr1:167868218-167869442	1224	promotor	ADCY10	1.55	0.27	1.38	0.8	-0.07	-0.04	1.09	0.63	-0.1	0.18	2.82	2.3	0.77	0.5	0.58	0.43	0.05	-0.19	0.23	-0.25	1.5	1.2	-0.07	-0.19	ADCY10	DCAF6			GPR161::chr1:168066469/-:0000197027|MPC2::chr1:167906306/-:0000036864|MPC2::chr1:167905135/-:0000035693|DCAF6::chr1:167905796/+:-000036354|ADCY10::chr1:167873228/-:0000003786|ADCY10::chr1:167871079/-:0000001637|ADCY10::chr1:167883463/-:0000014021|ADCY10::chr1:167871291/-:0000001849|ADCY10::chr1:167874435/-:0000004993|ADCY10::chr1:167868865/-:0000000000|MPZL1::chr1:167691186/+:0000177032
chr10:68127634-68139291	11657	genebody_exon	CTNNA3	0.1	-0.02	5.01	2.07	0.61	0.52	2.96	1.6	0.83	1	9.46	11.22	7.52	6.09	1.23	1.54	0.58	0.43	0.23	-0.58	12.82	19.48	5.37	2.73
chr2:222714674-222715243	569	other		0.23	0.04	0.43	0.08	0.07	0.09	0.03	0.18	0.14	-0.04	1.52	2.88	1.97	1.65	-0.01	0.02	0.14	0.03	-0.19	-0.18	-0.18	-0.11	-0.08	-0.04
chr16:20894658-20930686	36028	promotor	LYRM1|DCUN1D3	22.44	23.39	15.44	9.52	5.54	15.01	12.7	8.57	14.55	16.53	34.78	50.46	46.58	41.11	2.36	3.89	4.16	5.5	41.21	29.92	59.97	66.73	85.75	73.41	LYRM1|DCUN1D3	THUMPD1|ACSM1|ERI2|DCUN1D3			THUMPD1::chr16:20753285/-:-000141373|ACSM1::chr16:20702577/-:-000192081|ACSM3::chr16:20775311/+:0000119347|ACSM3::chr16:20781305/+:0000113353|ERI2::chr16:20817794/-:-000076864|LOC81691::chr16:20818273/+:0000076385|LOC81691::chr16:20817766/+:0000076892|LYRM1::chr16:20911619/+:0000000000|LYRM1::chr16:20911987/+:0000000000|LYRM1::chr16:20912425/+:0000000000|LYRM1::chr16:20911189/+:0000000000|LYRM1::…
chr3:150186890-150188245	1355	enhancer	SELT|EIF2A	1.98	2.41	0.64	1.63	0.79	0.76	0.9	0.62	1.13	1.74	2.28	3.55	2.84	3.08	0.37	1.28	0.24	1.02	1.27	0.94	4.52	4.98	4.5	3.11		SELT|EIF2A		TSC22D2	SELT::chr3:150321065/+:-000132820|SERP1::chr3:150264427/-:0000076182|TSC22D2::chr3:150126121/+:0000060769|EIF2A::chr3:150264573/+:-000076328
chr12:56842284-56843955	1671	promotor	TIMELESS|MIP	-0.17	-0.75	1.29	0.92	0.75	2.41	0.66	0.88	1.06	1.98	-0.25	0.27	-0.4	0.11	0.12	0	0.26	0.69	17.27	14.29	6.6	6.12	7.23	14.22	TIMELESS|MIP	ANKRD52|APOF|STAT2|PAN2|TIMELESS|SPRYD4|CNPY2|RBMS2|CS		STAT2|BAZ2A	ANKRD52::chr12:56652142/-:-000190142|APOF::chr12:56756582/-:-000085702|MIP::chr12:56848434/-:0000004479|STAT2::chr12:56754036/-:-000088248|STAT2::chr12:56750361/-:-000091923|IL23A::chr12:56732662/+:0000109622|PAN2::chr12:56726991/-:-000115293|PAN2::chr12:56727836/-:-000114448|PAN2::chr12:56727532/-:-000114752|RBMS2::chr12:56915608/+:-000071653|TIMELESS::chr12:56843199/-:0000000000|TIMELESS::chr12…
chr4:8395286-8405502	10216	enhancer	CPZ|TRMT44|GPR78	4.06	0.82	1.36	0.96	0.23	0.01	2.7	0.77	0.7	1.63	0.85	0.48	0.37	0.47	0.47	0.97	-0.06	0.18	-1.72	-2.1	4.45	4.15	1.87	-0.31		CPZ|TRMT44|GPR78			ACOX3::chr4:8442451/-:0000036949|ACOX3::chr4:8418261/-:0000012759|SH3TC1::chr4:8206893/+:0000188393|SH3TC1::chr4:8201059/+:0000194227|CPZ::chr4:8594386/+:-000188884|CPZ::chr4:8602683/+:-000197181|CPZ::chr4:8601179/+:-000195677|CPZ::chr4:8594386/+:-000188884|CPZ::chr4:8602683/+:-000197181|CPZ::chr4:8601179/+:-000195677|TRMT44::chr4:8442531/+:-000037029|GPR78::chr4:8582216/+:-000176714|HTRA3::chr4:…
chr12:54751955-54766359	14404	promotor	GPR84	7.94	3.67	4.89	4.51	1.35	3.32	3.09	2.64	3.18	3.28	1.82	4.87	2.22	0.95	1.27	1.94	0.93	1.83	9.98	10.94	23.24	25.52	15.89	14.31	GPR84	SMUG1|NCKAP1L|PDE1B|NFE2|CBX5		NFE2	COPZ1::chr12:54718873/+:0000033082|COPZ1::chr12:54734246/+:0000017709|SMUG1::chr12:54581685/-:-000170270|SMUG1::chr12:54582777/-:-000169178|SMUG1::chr12:54582740/-:-000169215|SMUG1::chr12:54577742/-:-000174213|SMUG1::chr12:54582379/-:-000169576|SMUG1::chr12:54581688/-:-000170267|NCKAP1L::chr12:54891494/+:-000125135|NCKAP1L::chr12:54893138/+:-000126779|NCKAP1L::chr12:54892567/+:-000126208|PDE1B::c…
chr10:8194565-8194953	388	3 prime	GATA3|TAF3	-0.05	-0.06	0.05	0.19	0.34	0.07	0.02	0.06	-0.07	-0.04	0.6	0.77	1.13	0.53	0	0.05	0.15	0.17	-0.1	0	-0.01	-0.09	-0.04	0.03				GATA3	GATA3::chr10:8096666/+:0000097899|GATA3::chr10:8097249/+:0000097316
chr19:57900479-57901909	1430	promotor	ZNF548	-0.22	-0.17	1.81	1.02	0.4	0.26	1.07	0.96	0.34	0.4	2.5	2.07	2.3	2.34	0.26	0.69	0.72	0.27	17.42	14.36	4.78	4	3.87	3.77	ZNF548	ZNF419|ZNF549|ZNF749|ZIK1|ZNF773|ZNF17	AURKC	ZNF419|ZNF549|ZNF304|ZNF550|ZNF749|ZIK1|ZNF264|ZNF416|ZNF547|ZNF543|ZNF773|ZNF805|ZNF460|ZNF17|ZNF772|ZNF548	ZNF543::chr19:57831864/+:0000068615|ZNF772::chr19:57988937/-:0000087028|ZNF304::chr19:57862641/+:0000037838|ZNF304::chr19:57864022/+:0000036457|ZNF304::chr19:57865092/+:0000035387|ZNF550::chr19:58071230/-:0000169321|ZNF749::chr19:57946692/+:-000044783|ZIK1::chr19:58095627/+:-000193718|ZNF264::chr19:57702867/+:0000197612|ZNF547::chr19:57874802/+:0000025677|ZNF547::chr19:57879911/+:0000020568|VN1R1…
chr4:69331841-69332543	702	enhancer	YTHDC1	0.74	0.7	0.04	0.35	0.47	0.19	0.16	0.42	0.5	0.37	-0.09	0.07	0.52	0.13	0.31	0.22	0.33	0.07	-0.01	0.09	0.08	0.59	1.34	0.26		YTHDC1			YTHDC1::chr4:69215823/-:-000116018|UGT2B17::chr4:69434244/-:0000101701|TMPRSS11E::chr4:69313166/+:0000018675
chr10:97226626-97240078	13452	enhancer	SORBS1|PDLIM1	8.68	4.38	13.04	7.96	1.02	0.31	5.19	4.76	3.97	2.5	10.36	14.21	7.61	4.97	3.09	6.67	2.21	1.49	1.13	-0.91	13.07	24.1	3.12	-1.13		SORBS1|PDLIM1			SORBS1::chr10:97250876/-:0000010798|SORBS1::chr10:97321176/-:0000081098|SORBS1::chr10:97200936/-:-000025690|SORBS1::chr10:97250876/-:0000010798|SORBS1::chr10:97321176/-:0000081098|SORBS1::chr10:97200936/-:-000025690|ALDH18A1::chr10:97413161/-:0000173083|ALDH18A1::chr10:97416566/-:0000176488|PDLIM1::chr10:97050904/-:-000175722
chr15:37338745-37339957	1212	genebody_intron	MEIS2	1.83	1.23	1.38	1.08	0.46	0.24	0.37	1.29	0.46	0.63	5.57	8.36	6	2.92	0.61	0.9	0.64	0.55	0.4	-0.03	4.24	7.81	1.8	0.49				MEIS2	MEIS2::chr15:37391596/-:0000051639|MEIS2::chr15:37390399/-:0000050442|MEIS2::chr15:37390561/-:0000050604|MEIS2::chr15:37392340/-:0000052383|MEIS2::chr15:37391799/-:0000051842|MEIS2::chr15:37393499/-:0000053542
chr4:169616148-169645091	28943	enhancer	PALLD	11.07	6.17	17.56	9.85	2.34	3	7.85	6.2	5.26	4.26	14.79	26.97	15.75	8.63	3.85	8.25	4.05	2.31	-5.57	-6.14	15.06	22.17	12.53	5.03		PALLD			PALLD::chr4:169602482/+:0000013666|PALLD::chr4:169432573/+:0000183575|PALLD::chr4:169589340/+:0000026808|PALLD::chr4:169753155/+:-000108064|PALLD::chr4:169418216/+:0000197932|PALLD::chr4:169798873/+:-000153782|PALLD::chr4:169552767/+:0000063381|PALLD::chr4:169602482/+:0000013666|PALLD::chr4:169432573/+:0000183575|PALLD::chr4:169589340/+:0000026808|PALLD::chr4:169753155/+:-000108064|PALLD::chr4:16…
chr7:137762346-137784649	22303	promotor	AKR1D1	10.21	7.13	3.68	2.89	1.2	-0.16	4.03	2.91	1.66	1.19	17.11	22.28	18.28	15.02	0.83	2.06	0.78	1.11	-1.68	-1.87	1.44	2.15	-1	-2.11	AKR1D1	CREB3L2		CREB3L2	CREB3L2::chr7:137686846/-:-000075500|LOC100130880::chr7:137638093/+:0000124253|AKR1D1::chr7:137761177/+:0000001169
chr3:28785401-28786120	719	genebody_intron	LINC00693	0.67	0.86	-0.03	0.6	0.32	-0.08	0.18	0.3	0.2	0.17	0.32	0.6	0.83	0.48	-0.04	0.37	0.08	0.3	-0.11	-0.04	0.23	0.97	0.44	0.26
chr19:10443697-10444810	1113	promotor	RAVER1	-0.21	-0.46	0.47	0.65	0.63	0.85	1.26	0.56	0.88	1.4	0	0.34	0.52	0.91	0.01	0.3	0.46	0.68	20.22	18.47	4.14	1.89	2.77	8.48	RAVER1	ZGLP1|S1PR2|DNMT1|PDE4A|FDX1L	TYK2	ZGLP1	ZGLP1::chr19:10420232/-:-000023465|RAVER1::chr19:10444313/-:0000000000|S1PR2::chr19:10341947/-:-000101750|S1PR2::chr19:10335622/-:-000108075|DNMT1::chr19:10305754/-:-000137943|MRPL4::chr19:10362821/+:0000080876|MRPL4::chr19:10362639/+:0000081058|S1PR5::chr19:10628667/-:0000183857|S1PR5::chr19:10625704/-:0000180894|S1PR5::chr19:10628125/-:0000183315|CDC37::chr19:10514270/-:0000069460|KEAP1::chr19:…
chr17:30770863-30772658	1795	promotor	PSMD11	-1.15	-0.51	1.63	1.28	1.31	1.62	1.02	0.94	0.65	2.15	-0.19	-0.22	-0.18	0.01	-0.06	0.51	0.39	0.3	38.23	31.91	9.85	8.33	11.04	12.55	PSMD11	CDK5R1|C17orf75			PSMD11::chr17:30771480/+:0000000000|CDK5R1::chr17:30814104/+:-000041446|CDK5R1::chr17:30814493/+:-000041835|RHBDL3::chr17:30593194/+:0000177669|C17orf75::chr17:30669227/-:-000101636|ZNF207::chr17:30677156/+:0000093707
chr8:38560550-38593844	33294	promotor	TACC1	14.79	3.51	23.95	7.94	1.51	0.73	10.33	6.59	2.05	1.45	26.01	26.73	10.95	6.54	7.97	6.68	2.56	3.09	5.61	-1.94	31.84	16.9	-1.08	-1.02	TACC1	TACC1|C8orf86|PLEKHA2			TACC1::chr8:38677039/+:-000083195|TACC1::chr8:38585703/+:0000000000|TACC1::chr8:38646221/+:-000052377|TACC1::chr8:38644721/+:-000050877|TACC1::chr8:38677039/+:-000083195|TACC1::chr8:38585703/+:0000000000|TACC1::chr8:38646221/+:-000052377|TACC1::chr8:38644721/+:-000050877|C8orf86::chr8:38386179/-:-000174371|PLEKHA2::chr8:38758752/+:-000164908|PLEKHA2::chr8:38775424/+:-000181580
chr13:48784119-48784843	724	enhancer	ITM2B|RB1|MED4	0.32	0.88	-0.19	0.21	0.57	-0.07	-0.01	0.04	0.19	0.16	6.67	10.83	15.63	9.15	-0.17	0.22	0.2	0.14	0.53	-0.1	-0.18	0.08	-0.17	-0.14		ITM2B|RB1|MED4			ITM2B::chr13:48807273/+:-000022430|RB1::chr13:48877882/+:-000093039|MED4::chr13:48664553/-:-000119566|MED4::chr13:48669276/-:-000114843|NUDT15::chr13:48611702/+:0000172417
chr15:36699527-36700682	1155	enhancer	C15orf41	0.57	0.84	0.37	0.91	0.78	0.97	0.62	0.05	0.78	0.27	0.26	0.55	1.03	0.43	-0.14	0.18	0.79	0.54	0.6	0.26	1.07	1.9	2.47	1.78		C15orf41			C15orf41::chr15:36871803/+:-000171121|C15orf41::chr15:36887069/+:-000186387|C15orf41::chr15:36871803/+:-000171121|C15orf41::chr15:36887069/+:-000186387
chr2:31782631-31784669	2038	enhancer	XDH	1.49	0.93	2.49	1.42	0.6	0.98	1.59	0.88	0.2	0.74	11.2	12.51	8.97	10.99	1.06	0.93	0.13	1.13	-0.18	-0.4	9.48	3.34	0.27	1.55		XDH			SRD5A2::chr2:31806039/-:0000021370|XDH::chr2:31637610/-:-000145021
chr22:38054006-38055507	1501	promotor	PDXP	-0.34	-0.54	0.58	0.11	0.72	1.14	1.05	0.35	1.13	1.29	-0.27	-0.49	-0.45	-0.09	0.11	-0.14	0.08	0.11	14.77	12.9	6.46	3.36	3.81	7.97	PDXP	GALR3|H1F0|MFNG|TRIOBP|CARD10|EIF3L|GCAT|LGALS2|LGALS1|NOL12			GGA1::chr22:38004480/+:0000049526|GGA1::chr22:38010196/+:0000043810|GGA1::chr22:38009039/+:0000044967|GGA1::chr22:38005046/+:0000048960|GGA1::chr22:38012928/+:0000041078|GGA1::chr22:38014454/+:0000039552|H1F0::chr22:38201113/+:-000145606|EIF3L::chr22:38245378/+:-000189871|TRIOBP::chr22:38092994/+:-000037487|TRIOBP::chr22:38093594/+:-000038087|TRIOBP::chr22:38142240/+:-000086733|TRIOBP::chr22:3809…
chr4:113033657-113035278	1621	enhancer	ALPK1|AP1AR|C4orf32	1.4	1.84	2.61	4.08	2.37	2.4	1.49	2.22	2.53	1.68	16.05	27.32	27.52	24.27	0.79	2.37	1.71	2.42	0.85	1.23	5.35	6.69	4.59	3.41		ALPK1|AP1AR|C4orf32	ALPK1		ALPK1::chr4:113218498/+:-000183220|C4orf32::chr4:113066552/+:-000031274|AP1AR::chr4:113152894/+:-000117616|TIFA::chr4:113199589/-:0000164311|TIFA::chr4:113207058/-:0000171780|TIFA::chr4:113199589/-:0000164311|TIFA::chr4:113207058/-:0000171780
chr8:18853129-18854695	1566	enhancer	PSD3	0.66	0.7	0.81	1.43	0.74	0.33	0.56	0.41	0.78	0.22	3.77	6.08	4.36	2.91	0.46	0.47	0.71	0.51	0.01	-0.06	0.43	0.61	1.23	0.31		PSD3			PSD3::chr8:18666404/-:-000186725|PSD3::chr8:18871195/-:0000016500|PSD3::chr8:18666404/-:-000186725|PSD3::chr8:18871195/-:0000016500
chr13:24000876-24008307	7431	promotor	SACS	5.99	4.46	0.98	2.83	1.54	0.26	1.76	1.13	0.55	2.08	0.62	1.59	1.03	0.82	0.76	1.55	0.88	1	29.29	22.6	8.5	20	15.98	7.81	SACS	SACS|TNFRSF19			SACS::chr13:23942625/-:-000058251|SACS::chr13:23949681/-:-000051195|SACS::chr13:23939415/-:-000061461|SACS::chr13:24007866/-:0000000000|SACS::chr13:23949407/-:-000051469|SACS::chr13:23985878/-:-000014998|SACS::chr13:23942625/-:-000058251|SACS::chr13:23949681/-:-000051195|SACS::chr13:23939415/-:-000061461|SACS::chr13:24007866/-:0000000000|SACS::chr13:23949407/-:-000051469|SACS::chr13:23985878/-:-0…
chr5:10323434-10332791	9357	enhancer	CMBL|MARCH6|FAM173B|ROPN1L	11.57	6.98	10.09	6.17	1.21	1.14	5.75	5.14	1.71	2.06	15.41	20.23	9.71	5.6	3.93	5.04	1.08	2.14	3.04	1.72	23.44	23	7.92	2.27		CMBL|MARCH6|FAM173B|ROPN1L			CMBL::chr5:10308167/-:-000015267|CMBL::chr5:10290892/-:-000032542|CMBL::chr5:10308167/-:-000015267|CMBL::chr5:10290892/-:-000032542|MARCH6::chr5:10353750/+:-000020959|FAM173B::chr5:10250020/-:-000073414|ROPN1L::chr5:10441973/+:-000109182|ROPN1L::chr5:10442238/+:-000109447|CCT5::chr5:10250281/+:0000073153
chr15:38508842-38518155	9313	enhancer	SPRED1	6.36	4.9	2.21	6.3	4.22	1.63	0.71	2.19	5.4	2	13.47	38.83	40.32	17.89	0.8	4.09	5.43	2.17	-0.71	-0.78	-1.48	4.46	8.52	0.59		SPRED1			SPRED1::chr15:38545051/+:-000026896
chr1:26014852-26022941	8089	enhancer	SEPN1|MTFR1L	5	2.21	1.56	1.53	0.71	0.05	3.29	1.89	1.85	1.09	11.07	13.75	10.95	10.04	1.64	1.32	0.73	1.39	-0.34	-0.32	0.12	0.77	1.69	0.3		SEPN1|MTFR1L			AUNIP::chr1:26185948/-:0000163007|PAQR7::chr1:26197743/-:0000174802|PAQR7::chr1:26190351/-:0000167410|SEPN1::chr1:26126666/+:-000103725|MAN1C1::chr1:25943958/+:0000070894|LDLRAP1::chr1:25870075/+:0000144777|MTFR1L::chr1:26146683/+:-000123742|MTFR1L::chr1:26149509/+:-000126568|MTFR1L::chr1:26147318/+:-000124377|MTFR1L::chr1:26146396/+:-000123455
chr9:131101845-131104181	2336	promotor	SLC27A4	0.2	-0.31	3.09	1.66	1.78	1.54	1.2	1.27	1.77	2.64	1.3	3.5	2.16	1.4	0.37	0.82	0.53	0.5	27.97	22.4	10.08	6.39	6.6	9.25	SLC27A4	TRUB2|URM1|CERCAM|GOLGA2|ODF2|CIZ1|GLE1			C9orf16::chr9:130922538/+:0000179307|LCN2::chr9:130911731/+:0000190114|TRUB2::chr9:131084696/-:-000017149|URM1::chr9:131133597/+:-000029416|CERCAM::chr9:131182758/+:-000078577|CERCAM::chr9:131185146/+:-000080965|CERCAM::chr9:131181438/+:-000077257|GOLGA2::chr9:131038267/-:-000063578|DNM1::chr9:130965633/+:0000136212|SLC27A4::chr9:131105405/+:-000001224|SLC27A4::chr9:131102838/+:0000000000|COQ4::c…
chr12:49075259-49076781	1522	promotor	KANSL2	-0.9	-0.43	1.51	1.6	1.23	2.1	1.28	1.07	1.36	1.62	-0.14	0.36	0.13	0.54	0	0.3	0.45	0.27	25.49	24.58	7.43	3.06	3.5	8.39	KANSL2	LALBA|CACNB3			DDX23::chr12:49245956/-:0000169175|KANSL2::chr12:49075423/-:0000000000|KANSL2::chr12:49076034/-:0000000000|ADCY6::chr12:49182819/-:0000106038|ADCY6::chr12:49177876/-:0000101095|ADCY6::chr12:49177220/-:0000100439|LALBA::chr12:48963828/-:-000111431|CACNB3::chr12:49212253/+:-000135472|CACNB3::chr12:49209356/+:-000132575|CACNB3::chr12:49208214/+:-000131433|C12orf54::chr12:48876285/+:0000198974|C12orf…
chr10:119562857-119570074	7217	3 prime	RAB11FIP2	6.54	4.49	7.83	0.98	0.18	1.66	5.64	2.43	1.44	3.86	8.44	6.37	5.82	6.04	2.38	1.46	1.05	2.43	1.97	0.7	26	13.33	6.03	10.45
chr12:109196857-109197865	1008	enhancer	CORO1C|DAO|SELPLG	0.67	-0.14	0.42	0.74	-0.08	0.28	-0.17	-0.14	0.39	0.05	0.17	0.06	-0.22	0.14	-0.18	0.42	-0.14	0.19	-0.6	-0.46	2.08	3.53	1.97	0.66		CORO1C|DAO|SELPLG			CORO1C::chr12:109125325/-:-000071532|CORO1C::chr12:109124618/-:-000072239|CORO1C::chr12:109095098/-:-000101759|CORO1C::chr12:109096773/-:-000100084|CORO1C::chr12:109125325/-:-000071532|CORO1C::chr12:109124618/-:-000072239|CORO1C::chr12:109095098/-:-000101759|CORO1C::chr12:109096773/-:-000100084|DAO::chr12:109278773/+:-000080908|DAO::chr12:109273856/+:-000075991|SELPLG::chr12:109025853/-:-00017100…
chr11:113060670-113061724	1054	enhancer	ANKK1|TTC12	0.92	0.76	1.03	0.49	0.4	0.79	0.98	0.42	0.86	0.67	0.3	0.65	0.61	0.58	0.33	0.23	0.43	0.4	0.55	0.33	3.06	5.45	5.62	4.17		ANKK1|TTC12	ANKK1		ANKK1::chr11:113258512/+:-000196788|TTC12::chr11:113185250/+:-000123526|TTC12::chr11:113186964/+:-000125240
chr2:240195983-240202431	6448	genebody_intron	HDAC4	14.1	8.29	2.87	1.19	1.98	3.99	3.89	1.56	2.61	4.47	2.67	3.23	3.15	3.58	0.76	1.59	1.62	1.8	4.3	4.09	17.78	19.45	26.6	25.16					HDAC4::chr2:240274612/-:0000072181|HDAC4::chr2:240322642/-:0000120211|HDAC4::chr2:240274612/-:0000072181|HDAC4::chr2:240322642/-:0000120211
chr5:114505034-114506422	1388	promotor	TRIM36	-0.41	-0.38	0.39	0.88	1.01	0.09	0.95	0.16	0.65	1.12	0.1	0.69	0.52	0.51	0.07	0.54	0.1	0.04	27.5	19	2.74	1.77	2.11	2.14	TRIM36	TRIM36			PGGT1B::chr5:114598568/-:0000092146|CCDC112::chr5:114620604/-:0000114182|CCDC112::chr5:114615464/-:0000109042|CCDC112::chr5:114632457/-:0000126035|CCDC112::chr5:114631986/-:0000125564|TRIM36::chr5:114483090/-:-000021944|TRIM36::chr5:114505659/-:0000000000|TRIM36::chr5:114516242/-:0000009820|TRIM36::chr5:114483090/-:-000021944|TRIM36::chr5:114505659/-:0000000000|TRIM36::chr5:114516242/-:0000009820
chrX:48726063-48726888	825	enhancer	PCSK1N|CCDC120|PQBP1	0.22	0.74	0.2	0.69	0.22	0.29	0.32	0.29	0.58	0.37	1.84	3.37	2.63	2.25	0.13	0.5	0.22	0.28	0.12	0.1	0.07	0.08	0.08	0.08		PCSK1N|CCDC120|PQBP1	PIM2	TFE3|GATA1	KCND1::chrX:48828250/-:0000101362|TIMM17B::chrX:48755425/-:0000028537|TIMM17B::chrX:48755103/-:0000028215|PCSK1N::chrX:48694039/-:-000032024|PIM2::chrX:48776412/-:0000049524|TFE3::chrX:48896869/-:0000169981|TFE3::chrX:48901042/-:0000174154|TFE3::chrX:48898094/-:0000171206|TFE3::chrX:48896869/-:0000169981|TFE3::chrX:48901042/-:0000174154|TFE3::chrX:48898094/-:0000171206|HDAC6::chrX:48660486/+:0000…
chr12:107348604-107351974	3370	promotor	TMEM263	-0.16	-0.75	4.82	3.87	1.77	2.41	1.65	2.22	2.25	2.14	0.54	0.59	0.37	0.42	0.35	1.2	0.82	0.51	58.1	37.79	23.35	16.52	11.84	17.8	TMEM263	TMEM263			MTERF2::chr12:107378992/-:0000027018|MTERF2::chr12:107380943/-:0000028969|MTERF2::chr12:107372548/-:0000020574|MTERF2::chr12:107379002/-:0000027028|RIC8B::chr12:107168398/+:0000180206|CRY1::chr12:107487634/-:0000135660|TMEM263::chr12:107360888/+:-000008914|TMEM263::chr12:107349543/+:0000000000|TMEM263::chr12:107350859/+:0000000000
chr8:69991556-69992840	1284	genebody_intron	LINC01592	1.29	0.88	1.17	1.3	0.56	0.48	1.26	0.98	0.79	0.67	1.48	1.78	1.4	0.84	0.71	0.86	0.52	0.48	0.28	0.2	0.58	1.39	1.03	0.46
chr1:68577152-68578152	1000	enhancer	DIRAS3	2.64	1.6	0.57	0.87	0.63	0.32	0.68	0.11	0.29	0.92	0.27	0.65	0.17	0.19	0.42	0.55	0.21	-0.01	0.19	-0.26	0.33	0.37	0.94	0.01		DIRAS3			WLS::chr1:68698228/-:0000120076|WLS::chr1:68698283/-:0000120131|DIRAS3::chr1:68513044/-:-000064108|DIRAS3::chr1:68516459/-:-000060693
chr10:127859923-127860709	786	genebody_intron	ADAM12	0.31	0.31	0.4	0.67	0.18	0.03	0.58	0.57	0.26	0.35	1.49	1.86	0.84	0.55	0.38	0.63	0.31	0.1	0.65	0.16	0.62	2	3	0.81
chr10:44456451-44461961	5510	genebody_exon	LINC00841	3.38	1.07	3.47	1.42	1.01	3.76	1.52	-0.38	0.64	0.98	2.44	2.16	2.69	3.21	0.73	0.79	0.84	2.32	0.42	0.61	0.11	0.01	0.58	1.07
chr20:7837276-7837979	703	3 prime	TMX4|HAO1	0.38	0.48	0.02	0.26	0.62	0.54	-0.05	0.01	0.46	0.56	0.27	0.66	1.87	1.31	0.01	0.17	0.56	0.76	-0.13	-0.11	-0.09	0.01	1.19	1.45					HAO1::chr20:7921092/-:0000083113|TMX4::chr20:8000475/-:0000162496
chr17:54173394-54174648	1254	enhancer	ANKFN1	-0.05	-0.2	0.98	0.19	-0.06	0.1	0.25	0.04	-0.32	0.5	0.48	0.03	0.04	-0.06	-0.04	0.03	-0.3	-0.28	0.11	-0.13	0.53	-0.15	-0.25	-0.27		ANKFN1			ANKFN1::chr17:54230835/+:-000056187
chr12:46653372-46663571	10199	promotor	SLC38A1	4.07	1.25	17.21	14.43	7.36	6.43	10.49	9.96	10.37	10.43	23.87	38.1	27.97	18.77	1.43	6.77	2.13	2.29	85.46	68.64	70.98	93.21	53.1	37.92	SLC38A1	SLC38A1			SLC38A1::chr12:46660277/-:0000000000|SLC38A1::chr12:46661769/-:0000000000|SLC38A1::chr12:46637096/-:-000016276|SLC38A1::chr12:46648718/-:-000004654|SLC38A1::chr12:46663207/-:0000000000|SLC38A1::chr12:46633675/-:-000019697|SLC38A2::chr12:46766644/-:0000103073|SLC38A2::chr12:46765161/-:0000101590
chr18:45407521-45409759	2238	genebody_intron	SMAD2	2.14	2.25	1.51	0.89	0.28	0.61	0.89	0.8	0.59	0.75	1.7	3.2	1.72	2.82	0.55	0.77	1.35	1.22	0.96	0.83	12.94	15.58	8.63	6.82				ZBTB7C|SMAD2	ZBTB7C::chr18:45567493/-:0000157734|ZBTB7C::chr18:45567493/-:0000157734|SMAD2::chr18:45423179/-:0000013420|SMAD2::chr18:45456969/-:0000047210|SMAD2::chr18:45457516/-:0000047757
chr15:100272850-100274387	1537	promotor	LYSMD4	0.52	0.11	1.17	0.71	0.44	0.68	0.79	0.7	0.73	1.16	0.26	-0.21	-0.14	0.02	0.14	0.42	0.23	0.24	15.96	12.45	4.35	2.67	2.49	5.01	LYSMD4			MEF2A	MEF2A::chr15:100173182/+:0000099668|MEF2A::chr15:100161077/+:0000111773|MEF2A::chr15:100138634/+:0000134216|MEF2A::chr15:100106132/+:0000166718|LYSMD4::chr15:100273232/-:0000000000|LYSMD4::chr15:100269935/-:-000002915|LYSMD4::chr15:100273589/-:0000000000|LYSMD4::chr15:100271402/-:-000001448|LYSMD4::chr15:100273648/-:0000000000|LYSMD4::chr15:100272211/-:-000000639
chr16:76227657-76229119	1462	enhancer	CNTNAP4	0.7	0.77	0.43	0.58	0.46	0.79	0.16	0.39	0.61	0.27	1.25	1.57	1.77	1.83	0.23	0.55	0.49	0.78	1.12	0.99	1.57	3.64	4.42	2.38		CNTNAP4			CNTNAP4::chr16:76311175/+:-000082056|CNTNAP4::chr16:76343734/+:-000114615
chr5:177502784-177503701	917	enhancer	PROP1|N4BP3|HNRNPAB|RMND5B	0.69	0.59	0.61	0.78	0.19	0.19	0.39	-0.01	0.24	0.22	0.33	-0.01	0.27	0.29	0.23	0.44	0.01	0.3	0.84	0.47	0.1	-0.09	0.15	0.36		PROP1|N4BP3|HNRNPAB|RMND5B		PROP1	PHYKPL::chr5:177658523/-:0000154822|PHYKPL::chr5:177659822/-:0000156121|NHP2::chr5:177580960/-:0000077259|PROP1::chr5:177423242/-:-000079542|RMND5B::chr5:177557961/+:-000054260|RMND5B::chr5:177558237/+:-000054536|RMND5B::chr5:177565108/+:-000061407|RMND5B::chr5:177562173/+:-000058472|HNRNPAB::chr5:177631815/+:-000128114|HNRNPAB::chr5:177631507/+:-000127806|N4BP3::chr5:177546554/+:-000042853|N4BP3…
chr4:114730097-114733547	3450	enhancer	CAMK2D	0.72	1.75	0.71	0.26	0.61	4.27	-0.27	-0.3	2.1	2.36	3.64	6.66	8.98	7.61	-0.05	0.64	1.25	2	-1.64	-1.24	2.45	5.58	19.3	13.34		CAMK2D	CAMK2D		CAMK2D::chr4:114683082/-:-000047015|ARSJ::chr4:114900877/-:0000167330
chr6:112939962-112940532	570	other		0.14	0.05	0.4	0.42	0.21	0.1	0	0.1	0.14	0.36	1.08	1.95	1.04	0.81	0.17	0.2	0.26	0.03	-0.02	-0.05	0.08	0.13	0.21	0.07
chr2:28019643-28033598	13955	enhancer	CCDC121|SUPT7L|BRE	14.3	12.46	13.06	9.04	7.92	12.75	7.53	6.97	10.73	13.37	15.04	27.54	22.86	17.9	1.85	7.04	5.31	10.42	-0.78	0.49	45.09	59.76	49.16	43.58		CCDC121|SUPT7L|BRE		ZNF512	MRPL33::chr2:27994583/+:0000025060|CCDC121::chr2:27851744/-:-000167899|CCDC121::chr2:27851897/-:-000167746|CCDC121::chr2:27850783/-:-000168860|SUPT7L::chr2:27886706/-:-000132937|SUPT7L::chr2:27884309/-:-000135334|SUPT7L::chr2:27884467/-:-000135176|SUPT7L::chr2:27885147/-:-000134496|RBKS::chr2:28113262/-:0000079664|RBKS::chr2:28081437/-:0000047839|RBKS::chr2:28093756/-:0000060158|RBKS::chr2:281132…
chr11:118161481-118162651	1170	enhancer	UBE4A|MPZL2|MPZL3|AMICA1|KMT2A|SCN2B|ATP5L|SCN4B|CD3E|CD3G	1.22	0.39	0.44	0.96	0.45	0.55	0.19	0.16	0.96	0.86	1.18	3.92	3.73	2.21	0.24	0.79	0.6	0.62	0.73	0.78	0.25	0.6	0.88	0.22		UBE4A|MPZL2|MPZL3|AMICA1|KMT2A|SCN2B|ATP5L|SCN4B|CD3E|CD3G			KMT2A::chr11:118307204/+:-000144553|MPZL2::chr11:118135250/-:-000026231|MPZL3::chr11:118123082/-:-000038399|AMICA1::chr11:118095808/-:-000065673|AMICA1::chr11:118083275/-:-000078206|AMICA1::chr11:118085600/-:-000075881|AMICA1::chr11:118084073/-:-000077408|TMPRSS4::chr11:117975405/+:0000186076|TMPRSS4::chr11:117973815/+:0000187666|TMPRSS4::chr11:117969699/+:0000191782|TMPRSS4::chr11:117965536/+:00…
chr18:57566671-57567917	1246	promotor	PMAIP1	0.39	-0.05	0.62	0.98	0.74	1.07	0.78	0.54	1.52	1.37	-0.17	0.43	0.64	0.44	0.67	0.74	0.42	0.67	15.7	13.26	1.09	0.47	1.24	3.36	PMAIP1				PMAIP1::chr18:57567191/+:0000000000
chr1:54752529-54753382	853	enhancer	CDCP2|CYB5RL	0.92	0.09	0.16	0.74	0.04	0.06	0.5	0.53	0.13	0.13	0.24	0.41	0.02	0.08	-0.04	0.74	0.29	0.2	0.4	-0.01	0.85	0.97	0.48	0.34		CDCP2|CYB5RL			MRPL37::chr1:54665839/+:0000086690|SSBP3::chr1:54872067/-:0000118685|CDCP2::chr1:54618678/-:-000133851|CYB5RL::chr1:54665745/-:-000086784|CYB5RL::chr1:54662163/-:-000090366|CYB5RL::chr1:54661387/-:-000091142
chr8:105799638-105802083	2445	enhancer	LRP12	0.04	-0.31	4.78	2.22	1.41	3.59	1.49	1.72	1.92	1.39	2.39	4.59	4.59	2.3	0.12	1.3	1.06	1.65	-0.91	-0.4	2.78	3.46	5.99	3.88		LRP12			LRP12::chr8:105601251/-:-000198387
chr14:93439364-93453337	13973	enhancer	TMEM251	10.62	4.67	7.1	2.89	2.03	1.75	5.55	2.6	2.07	2.96	1.77	2.04	1.11	-0.17	1.79	2.58	1.18	-0.2	-0.35	-1.25	26.43	20.49	9.54	5.64		TMEM251			ITPK1::chr14:93581649/-:0000128312|ITPK1::chr14:93582262/-:0000128925|ITPK1::chr14:93581528/-:0000128191|CHGA::chr14:93389444/+:0000049920|GOLGA5::chr14:93260575/+:0000178789|GOLGA5::chr14:93263752/+:0000175612|TMEM251::chr14:93651295/+:-000197958|TMEM251::chr14:93651374/+:-000198037|TMEM251::chr14:93652604/+:-000199267|MOAP1::chr14:93651057/-:0000197720|MOAP1::chr14:93650706/-:0000197369|MOAP1::…
chr12:110317790-110339203	21413	promotor	GLTP|TCHP	9.2	13.29	1.44	4.26	3.42	4.13	2.7	1.26	4.34	5.26	1.29	7.65	8.54	7.21	-0.43	2.09	0.4	1.48	38.23	34.89	11.8	16.2	28.04	24.35	GLTP|TCHP	ANKRD13A|TRPV4			C12orf76::chr12:110505499/-:0000166296|C12orf76::chr12:110503837/-:0000164634|ANKRD13A::chr12:110437234/+:-000098031|FAM222A::chr12:110181905/+:0000135885|FAM222A::chr12:110152186/+:0000165604|GLTP::chr12:110318292/-:0000000000|TCHP::chr12:110338322/+:0000000000|TCHP::chr12:110338078/+:0000000000|GIT2::chr12:110434193/-:0000094990|TRPV4::chr12:110252631/-:-000065159|TRPV4::chr12:110271211/-:-0000…
chr5:172720552-172721697	1145	enhancer	NKX2-5	1.8	0.53	0.62	0.34	0.12	1.05	0.66	0.5	0.56	1.07	0.19	0.22	-0.05	0.19	0.2	0.42	0.24	0.36	2.39	3.98	1.17	0.4	3.16	2.79		NKX2-5		NKX2-5	STC2::chr5:172756505/-:0000034808|BNIP1::chr5:172571444/+:0000149108|NKX2-5::chr5:172662314/-:-000058238
chr2:56868735-56869676	941	other		0.09	0.05	0.89	0.29	0.17	0.04	0.51	0.31	0.31	0.09	1.43	1.43	0.35	0.07	0.27	0.25	0.02	-0.02	0.24	-0.08	0.26	0.19	-0.06	0.02
chr3:145939720-145941743	2023	promotor	PLSCR4	1.5	1.17	1.12	1.23	0.64	2.02	0.07	0.22	0.65	0.79	-0.08	0.24	0.95	0.44	0.57	0.52	0.54	1.26	-0.19	0.63	1.98	2.68	7.56	6.08	PLSCR4	PLOD2			PLOD2::chr3:145879281/-:-000060439|PLSCR4::chr3:145938711/-:-000001009|PLSCR4::chr3:145968423/-:0000026680|PLSCR4::chr3:145939878/-:0000000000|PLSCR4::chr3:145968650/-:0000026907|PLSCR4::chr3:145968965/-:0000027222|PLSCR4::chr3:145941563/-:0000000000
chr6:79519550-79521267	1717	enhancer	IRAK1BP1	0.98	0.36	2.84	0.56	0.15	0.21	1.37	1.02	0.33	0.37	5.77	6.21	1.39	2.27	0.87	-0.04	0.04	-0.02	-0.49	-0.29	1.61	2.02	-0.19	-0.15		IRAK1BP1			IRAK1BP1::chr6:79577260/+:-000055993
chr18:18763265-18764443	1178	enhancer	ROCK1|GREB1L	0.13	0.36	0.84	0.09	-0.09	0.02	0.29	0.04	-0.05	0.13	0.2	0.51	0.04	0.1	0.25	0.36	0.4	-0.11	-0.04	-0.23	0.75	0.72	-0.02	0.12		ROCK1|GREB1L	ROCK1		ROCK1::chr18:18691811/-:-000071454|GREB1L::chr18:18822202/+:-000057759|GREB1L::chr18:18963470/+:-000199027|GREB1L::chr18:18945987/+:-000181544|GREB1L::chr18:18822202/+:-000057759|GREB1L::chr18:18963470/+:-000199027|GREB1L::chr18:18945987/+:-000181544
chr16:84676192-84683055	6863	promotor	KLHL36	6.05	5.4	4.22	2.88	1.54	2.06	4.1	1.78	1.19	2.1	3.91	3.42	1.76	3.47	0.5	0.45	0.28	0.68	24.6	16.46	14.27	7.68	8.12	11.23	KLHL36	TLDC1|USP10|COTL1|CRISPLD2			KLHL36::chr16:84684457/+:-000001402|KLHL36::chr16:84682116/+:0000000000|CRISPLD2::chr16:84872027/+:-000188972|CRISPLD2::chr16:84853586/+:-000170531|USP10::chr16:84738345/+:-000055290|USP10::chr16:84733554/+:-000050499|COTL1::chr16:84651701/-:-000024491|TLDC1::chr16:84531716/-:-000144476|TLDC1::chr16:84538287/-:-000137905
chr5:9712310-9713499	1189	enhancer	SEMA5A|TAS2R1	0.65	1.13	1.01	1.19	0.82	0.36	1.96	1.79	1.64	2.07	0.72	1.53	0.62	0.53	0.32	1.13	0.5	0.67	-0.15	0.01	2.91	5.46	1.23	1.06		SEMA5A|TAS2R1			SEMA5A::chr5:9546232/-:-000166078|TAS2R1::chr5:9630462/-:-000081848
chr6:169612204-169625078	12874	genebody_exon	THBS2|THBS2|THBS2|THBS2|THBS2	4.48	3.64	13.54	2.91	1.48	5.5	2.69	2.65	1.21	2.33	7.27	10.59	8.34	8.56	1.16	2.3	0.8	1.84	0.33	0.31	24.93	20.9	12.17	12.53					THBS2::chr6:169650900/-:0000025822|THBS2::chr6:169654208/-:0000029130|THBS2::chr6:169653990/-:0000028912
chr1:237978650-237979577	927	genebody_intron	RYR2	0.69	0.2	0.64	0.86	0.39	0.01	0.05	0.27	0.47	0.37	1.01	2.18	1.75	0.94	0.21	0.73	0.29	0.16	-0.11	-0.15	0.66	0.5	-0.04	-0.1					ZP4::chr1:238054221/-:0000074644
chr17:40915480-40935930	20450	promotor	VPS25|RAMP2|WNK4	8.73	9.48	1.28	1.45	1.22	2.06	2.28	1.01	2.9	3.83	-0.15	-2.58	-2.12	1.02	0.62	-0.43	0.23	1.62	20.23	19.03	9.11	4.94	12.8	14.5	VPS25|RAMP2|WNK4	AOC3|AOC2|RUNDC1|EZH1|CNTD1|PLEKHH3|CCR10|PSME3|PSMC3IP|G6PC|FAM134C	WNK4	MLX	PTGES3L::chr17:41132544/-:0000196614|AOC3::chr17:41006464/+:-000070534|AOC3::chr17:41003200/+:-000067270|AOC3::chr17:41005259/+:-000069329|AOC2::chr17:40996608/+:-000060678|RUNDC1::chr17:41132581/+:-000196651|PLEKHH3::chr17:40829047/-:-000086433|EZH1::chr17:40882935/-:-000032545|EZH1::chr17:40880969/-:-000034511|EZH1::chr17:40897070/-:-000018410|CNTD1::chr17:40950853/+:-000014923|VPS25::chr17:409…
chr18:46427716-46430110	2394	3 prime	SMAD7|CTIF|DYM	8.41	3.47	4.28	1.99	2.27	3.25	1.73	0.87	0.9	2.37	1.03	1.26	1.34	0.79	0.32	1.48	0.72	1.46	-0.37	-0.02	13.55	13.87	11.07	10.25				SMAD7	SMAD7::chr18:46474806/-:0000044696|SMAD7::chr18:46469176/-:0000039066|SMAD7::chr18:46475702/-:0000045592|SMAD7::chr18:46477080/-:0000046970
chr6:5259919-5262543	2624	promotor	FARS2|LYRM4	-0.46	-0.97	3.38	3.03	1.92	2.21	1.74	1.52	1.79	1.99	2.62	4.77	3.49	2.53	0.91	1.05	0.8	0.84	62.3	50.85	27.31	20.56	18.11	20.12	FARS2|LYRM4	FARS2			FARS2::chr6:5368782/+:-000106239|FARS2::chr6:5261583/+:0000000000|FARS2::chr6:5368782/+:-000106239|FARS2::chr6:5261583/+:0000000000|LYRM4::chr6:5261182/-:0000000000
chr13:20160868-20162238	1370	enhancer	TPTE2|MPHOSPH8	1	0.42	0.35	0.77	0.44	-0.07	0.08	0.35	-0.23	-0.14	-0.4	-0.04	0.35	-0.18	-0.03	0.26	-0.24	-0.11	1.1	0.74	0.13	1.14	1.17	0.28		TPTE2|MPHOSPH8			TPTE2::chr13:20080077/-:-000080791|TPTE2::chr13:20077416/-:-000083452|TPTE2::chr13:20012614/-:-000148254|TPTE2::chr13:20110902/-:-000049966|TPTE2::chr13:20080077/-:-000080791|TPTE2::chr13:20077416/-:-000083452|TPTE2::chr13:20012614/-:-000148254|TPTE2::chr13:20110902/-:-000049966|MPHOSPH8::chr13:20207787/+:-000045549|PSPC1::chr13:20356930/-:0000194692|PSPC1::chr13:20357158/-:0000194920
chr7:47266889-47307178	40289	3 prime	TNS3	11.39	2.48	16.12	5.06	1.94	1.37	13.37	6.19	2.16	3.09	15.58	12.73	7.24	4.13	5.57	3.11	2.63	0.39	3.59	2.75	19.73	10.8	5.82	3.81					TNS3::chr7:47479255/-:0000172077|TNS3::chr7:47481652/-:0000174474|TNS3::chr7:47479255/-:0000172077|TNS3::chr7:47481652/-:0000174474
chr2:108966063-108966952	889	enhancer	LIMS1|GCC2|SULT1C4	0.33	0.33	0.56	-0.02	-0.02	0.21	0.05	-0.04	0.04	0.18	0.08	0.13	0.17	-0.26	-0.04	0.13	0.07	0.07	-0.15	-0.15	-0.07	-0.2	0.04	-0.32		LIMS1|GCC2|SULT1C4			SULT1C2::chr2:108910102/+:0000055961|SULT1C2::chr2:108905094/+:0000060969|LIMS1::chr2:109150810/+:-000183858|GCC2::chr2:109065576/+:-000098624|SULT1C4::chr2:108994420/+:-000027468
chr2:211286162-211287391	1229	enhancer	ACADL|CPS1|MYL1	2.65	1	1.9	0.82	0.15	0.04	1.67	0.65	0.4	0.07	3.58	2.48	1.15	0.74	0.98	0.55	0.25	0.48	0.75	0.37	1	0.8	0.19	0.04		ACADL|CPS1|MYL1			LANCL1::chr2:211341490/-:0000054099|LANCL1::chr2:211341498/-:0000054107|LANCL1::chr2:211341428/-:0000054037|LANCL1::chr2:211341135/-:0000053744|ACADL::chr2:211090214/-:-000195948|CPS1::chr2:211459231/+:-000171840|CPS1::chr2:211460210/+:-000172819|CPS1::chr2:211421322/+:-000133931|CPS1::chr2:211342405/+:-000055014|CPS1::chr2:211458078/+:-000170687|CPS1::chr2:211459231/+:-000171840|CPS1::chr2:21146…
chr19:46572901-46586714	13813	enhancer	MYPOP|NOVA2|NANOS2|PGLYRP1|IRF2BP1|IGFL2|IGFL1|IGFL4	8.57	8.3	3.13	4.92	4.31	3.39	2.06	2.79	6.34	4.18	3.72	9.05	13.97	8.95	1.17	4.52	4.05	3.38	0.36	3.33	-0.78	2.39	11.53	0.97		MYPOP|NOVA2|NANOS2|PGLYRP1|IRF2BP1|IGFL2|IGFL1|IGFL4			CCDC61::chr19:46506265/+:0000066636|CCDC61::chr19:46498718/+:0000074183|CCDC61::chr19:46506265/+:0000066636|CCDC61::chr19:46498718/+:0000074183|MYPOP::chr19:46405082/-:-000167819|MYPOP::chr19:46405861/-:-000167040|NOVA2::chr19:46476656/-:-000096245|NANOS2::chr19:46418035/-:-000154866|PGLYRP1::chr19:46526555/-:-000046346|IRF2BP1::chr19:46389427/-:-000183474|IGFL3::chr19:46627930/-:0000041216|IGFL2…
chr9:96792152-96794470	2318	promotor	PTPDC1	-0.38	-0.13	2.29	1.4	1.79	3.03	1.51	0.43	1.52	2.56	0.29	0.1	0.41	0.89	0.22	0.89	0.18	0.67	38.25	34.45	10.39	8.84	10.2	16.39	PTPDC1	BARX1|PTPDC1		BARX1	BARX1::chr9:96717607/-:-000074545|PTPDC1::chr9:96793075/+:0000000000|PTPDC1::chr9:96827015/+:-000032545|PTPDC1::chr9:96793090/+:0000000000|PTPDC1::chr9:96846710/+:-000052240|PTPDC1::chr9:96793075/+:0000000000|PTPDC1::chr9:96827015/+:-000032545|PTPDC1::chr9:96793090/+:0000000000|PTPDC1::chr9:96846710/+:-000052240
chr4:89885065-89885790	725	enhancer	TIGD2|FAM13A	2.34	1.95	0.12	0.23	0.48	0.26	0.09	0.3	0.55	0.26	2.65	4.51	3.88	3.1	0	0.3	0.29	0.51	-0.03	0.1	0.54	2.97	3.21	1.18		TIGD2|FAM13A			TIGD2::chr4:90033967/+:-000148177|FAM13A::chr4:89744511/-:-000140554|FAM13A::chr4:89978345/-:0000092555|FAM13A::chr4:89744511/-:-000140554|FAM13A::chr4:89978345/-:0000092555
chr2:15870121-15873065	2944	enhancer	NBAS	5.52	2	1.91	2.63	0.73	0.12	1.14	1.29	0.93	0.78	2.4	6.4	2.12	0.91	0.97	2.93	0.76	0.31	0.55	-0.16	2.96	9.89	0.27	-0.38		NBAS			NBAS::chr2:15701471/-:-000168650|DDX1::chr2:15731744/+:0000138377
chr7:86973138-86975591	2453	promotor	CROT	-1.07	-0.29	2.71	1.97	1.79	1.6	1.13	0.94	1.33	1.6	1.01	0.98	0.16	0.83	0.45	1.1	0.66	0.47	37.31	23.45	12.17	9.37	7.42	7.6	CROT	TMEM243		DMTF1	CROT::chr7:86975655/+:-000000064|CROT::chr7:86974950/+:0000000000|CROT::chr7:86978363/+:-000002772|TMEM243::chr7:86849030/-:-000124108|DMTF1::chr7:86800310/+:0000172828|DMTF1::chr7:86781676/+:0000191462|DMTF1::chr7:86783705/+:0000189433|DMTF1::chr7:86783543/+:0000189595|DMTF1::chr7:86795798/+:0000177340|DMTF1::chr7:86794249/+:0000178889|DMTF1::chr7:86792810/+:0000180328|DMTF1::chr7:86781869/+:000…
chr3:110627024-110628050	1026	enhancer	PVRL3	0.34	0.2	0.21	0.89	0.1	0.15	0.31	-0.01	0.06	0.03	0.11	-0.01	-0.1	0.19	-0.1	0.53	0.01	0.08	-0.11	0.01	-0.08	0.01	-0.15	-0.1		PVRL3			PVRL3::chr3:110791014/+:-000162964|PVRL3::chr3:110790605/+:-000162555
chr7:78910920-78923735	12815	genebody_intron	MAGI2	4.86	12.81	2.93	0.03	0.01	7.48	-0.79	-0.88	0.39	3.41	7.78	9.49	6.91	7.57	-0.62	-0.42	0.51	2.97	-0.92	-1.62	12.74	10.33	14.33	26.13					MAGI2::chr7:79082889/-:0000159154
chr1:97378256-97379402	1146	3 prime	DPYD|PTBP2	-0.2	-0.03	0.88	0.25	0.22	0.07	-0.05	0.08	-0.16	-0.23	1.85	2.37	0.57	0.34	0.19	0.14	-0.01	0.35	-0.36	-0.29	0.82	-0.09	-0.34	-0.01					PTBP2::chr1:97189119/+:0000189137|PTBP2::chr1:97235258/+:0000142998|PTBP2::chr1:97215086/+:0000163170|PTBP2::chr1:97187160/+:0000191096|PTBP2::chr1:97189119/+:0000189137|PTBP2::chr1:97235258/+:0000142998|PTBP2::chr1:97215086/+:0000163170|PTBP2::chr1:97187160/+:0000191096
chr1:182142721-182177760	35039	enhancer	ZNF648	8.22	1.95	18.61	3.13	-0.09	0.42	8.87	4.46	-1.04	-0.5	15.18	8.79	3.24	2.55	2.24	0.15	-0.7	-0.59	-1.82	-1.9	16.14	4.21	-3.37	-2.68		ZNF648		ZNF648	GLUL::chr1:182357884/-:0000180124|GLUL::chr1:182361340/-:0000183580|GLUL::chr1:182359986/-:0000182226|GLUL::chr1:182360538/-:0000182778|TEDDM1::chr1:182369750/-:0000191990|ZNF648::chr1:182030846/-:-000111875|ZNF648::chr1:182027207/-:-000115514
chr16:81584984-81586327	1343	genebody_intron	CMIP	2.87	1.18	0.79	1.06	0.01	-0.05	0.38	-0.04	-0.08	0.38	-0.11	0.02	-0.08	-0.32	0.05	1	0.13	0.32	-0.33	-0.22	2.76	3.26	2.09	0.38					CMIP::chr16:81528953/+:0000056031|CMIP::chr16:81478774/+:0000106210|CMIP::chr16:81528953/+:0000056031|CMIP::chr16:81478774/+:0000106210
chr11:11413008-11414133	1125	enhancer	CSNK2A3	1.83	1.37	0.93	0.91	0.29	0.81	0.72	0.18	0.58	0.5	0.7	0.75	1.1	1.03	0.2	0.44	0.44	0.4	0.87	0.97	1.43	1.31	3.12	2.32		CSNK2A3	CSNK2A3		CSNK2A3::chr11:11374903/-:-000038105
chr2:28903817-28918851	15034	enhancer	SPDYA|PPP1CB|WDR43	8.91	3.37	12.36	4.98	0.01	0.5	6.86	4.13	0.74	0.07	3.12	5.47	1.52	0.09	2.35	4.07	0.71	0.15	-0.55	-1.3	25.98	23.81	3.06	0.99		SPDYA|PPP1CB|WDR43			SPDYA::chr2:29033699/+:-000114848|SPDYA::chr2:29037478/+:-000118627|SPDYA::chr2:29038862/+:-000120011|TRMT61B::chr2:29093174/-:0000174323|PPP1CB::chr2:28974903/+:-000056052|PPP1CB::chr2:28974625/+:-000055774|PPP1CB::chr2:28974613/+:-000055762|WDR43::chr2:29117508/+:-000198657|PLB1::chr2:28718937/+:0000184880
chr12:15834566-15855618	21052	promotor	EPS8	3.9	6.64	2.4	0.93	3.45	14.05	-0.58	0.58	8.04	6.46	-0.43	5	9.27	8.35	0.28	0.49	5.21	5.41	-4.05	-3.11	5.79	18.64	60.04	40.25	EPS8	STRAP			PTPRO::chr12:15699277/+:0000135289|PTPRO::chr12:15702027/+:0000132539|PTPRO::chr12:15699277/+:0000135289|PTPRO::chr12:15702027/+:0000132539|EPS8::chr12:15942509/-:0000086891|EPS8::chr12:15835905/-:0000000000|EPS8::chr12:15942509/-:0000086891|EPS8::chr12:15835905/-:0000000000|STRAP::chr12:16035287/+:-000179669
chr6:152011256-152012593	1337	promotor	ESR1	0.04	-0.21	0.43	0.45	0	0.57	0.11	-0.36	0.26	0.33	0.19	-0.1	-0.07	0.47	0.09	-0.17	-0.06	0.13	0.32	0.04	2.05	1.64	0.81	2.01	ESR1	ESR1		ESR1	CCDC170::chr6:151815174/+:0000196082|ESR1::chr6:152128453/+:-000115860|ESR1::chr6:152126807/+:-000114214|ESR1::chr6:152011630/+:0000000000|ESR1::chr6:152128813/+:-000116220|ESR1::chr6:152128977/+:-000116384|ESR1::chr6:152023009/+:-000010416|ESR1::chr6:152128453/+:-000115860|ESR1::chr6:152126807/+:-000114214|ESR1::chr6:152011630/+:0000000000|ESR1::chr6:152128813/+:-000116220|ESR1::chr6:152128977/+…
chr6:27543387-27601698	58311	enhancer	HIST1H3H|HIST1H2AI|ZNF184	7.2	8.78	12.47	12.72	9.33	8.1	0.03	1.44	2.1	3.42	16.44	36.38	33.54	28.1	3.79	5.72	0.52	2.98	108.58	96.83	20.4	25.32	8.94	11.25		HIST1H3H|HIST1H2AI|ZNF184		ZNF391|ZNF184	HIST1H2BL::chr6:27775708/-:0000174010|ZNF184::chr6:27440211/-:-000103176|ZNF184::chr6:27440896/-:-000102491|HIST1H3H::chr6:27777841/+:-000176143|HIST1H2AI::chr6:27775976/+:-000174278|ZNF391::chr6:27367220/+:0000176167|ZNF391::chr6:27356523/+:0000186864|ZNF391::chr6:27368071/+:0000175316
chr4:11000246-11001036	790	other		-0.08	-0.18	0.13	0.26	0.56	0.07	0.36	0.12	0.3	0.22	0.93	1.59	1.01	0.95	0.21	0.25	0.21	0.36	-0.19	0.09	2.49	3.76	2.56	1.31
chr13:40629433-40858453	229020	genebody_exon	LINC00332|LINC00332|LINC00332|LINC00332|LINC00548|LINC00548|LINC00548|LINC00548|LINC00548|LINC00548	81.58	49.85	620.43	60.6	18.53	142	196.16	76.06	43.97	95.98	161.79	182.98	131.68	123.74	49.33	54.9	20.72	49.67	-35.5	-31.52	533.31	248.54	157.29	188.58
chr11:38188324-38191751	3427	other		0.91	1.38	3.55	1.75	0.78	1.43	0.51	1.04	1.39	1.28	6.77	10.25	8.98	7.37	0.48	1.4	0.46	0.67	0.68	-0.01	5.7	5.42	2.17	1.18
chr1:228799859-228800963	1104	enhancer	BTNL10|TRIM17|RHOU|HIST3H2A	0.45	0.47	0.98	0.61	0.59	0.33	0.69	0.68	0.37	0.37	3.37	8.07	5.62	2.91	0.32	0.64	0.42	0.18	-0.15	0.01	0.3	0.86	0.31	0.12		BTNL10|TRIM17|RHOU|HIST3H2A			BTNL10::chr1:228699704/-:-000100155|BTNL10::chr1:228699988/-:-000099871|TRIM17::chr1:228604582/-:-000195277|TRIM17::chr1:228602813/-:-000197046|TRIM17::chr1:228602777/-:-000197082|RNF187::chr1:228675067/+:0000124792|RHOU::chr1:228870823/+:-000069860|HIST3H2BB::chr1:228645807/+:0000154052|HIST3H2A::chr1:228645559/-:-000154300
chr4:157294349-157312860	18511	other		-0.71	-2.06	13.89	1.09	-1.43	1.16	3.45	-0.32	0.17	-0.72	8.89	5.14	1.69	0.75	2.73	1.9	0.68	0.86	-3.63	-4.38	23.79	9.89	3.34	0.74
chr5:56641928-56642818	890	3 prime	GPBP1|ACTBL2	0.12	0.29	0.01	0.82	0.97	0.25	0.01	0.41	0.9	0.24	1.98	5.98	7.72	2.96	0.31	0.53	0.97	0.53	-0.28	-0.21	-0.33	0.08	0.44	-0.12					GPBP1::chr5:56471274/+:0000170654|GPBP1::chr5:56526672/+:0000115256|GPBP1::chr5:56542126/+:0000099802|GPBP1::chr5:56531792/+:0000110136|GPBP1::chr5:56526924/+:0000115004|GPBP1::chr5:56469774/+:0000172154|GPBP1::chr5:56509900/+:0000132028|GPBP1::chr5:56471274/+:0000170654|GPBP1::chr5:56526672/+:0000115256|GPBP1::chr5:56542126/+:0000099802|GPBP1::chr5:56531792/+:0000110136|GPBP1::chr5:56526924/+:00…
chr12:22031832-22032998	1166	enhancer	CMAS|KCNJ8	0.34	-0.13	1.24	1.21	0.19	0.51	0.11	0.5	0.6	0.41	11.29	16.59	9.55	9.23	0.46	0.99	0.24	0.52	-0.24	-0.19	0.21	0.53	0.58	0.36		CMAS|KCNJ8			CMAS::chr12:22199109/+:-000166111|KCNJ8::chr12:21926619/-:-000105213|KCNJ8::chr12:21927754/-:-000104078|ABCC9::chr12:22089627/-:0000056629
chr19:24235336-24236052	716	promotor	ZNF254	0.16	0.2	0.1	0.55	0.28	0.01	0.11	0.5	0.13	0.22	3.78	4.06	3.85	1.82	0.17	0.42	0.19	0.05	0.07	-0.04	0.4	0.24	-0.11	0.22	ZNF254	ZNF254		ZNF254	ZNF254::chr19:24309055/+:-000073003|ZNF254::chr19:24288741/+:-000052689|ZNF254::chr19:24269961/+:-000033909|ZNF254::chr19:24289349/+:-000053297|ZNF254::chr19:24232278/+:0000003058|ZNF254::chr19:24274702/+:-000038650|ZNF254::chr19:24228985/+:0000006351|ZNF254::chr19:24216206/+:0000019130|ZNF254::chr19:24309055/+:-000073003|ZNF254::chr19:24288741/+:-000052689|ZNF254::chr19:24269961/+:-000033909|ZNF…
chr21:46347124-46472707	125583	promotor	ITGB2|FAM207A	152.72	64.53	144.92	82.14	28.79	40.89	93.34	71.6	60.74	53.01	61.42	98.2	57.24	44.62	21.87	46.57	18.22	14.8	102.78	76.5	403.67	527.87	256.54	157.17	ITGB2|FAM207A	PTTG1IP|ITGB2|SUMO3|ADARB1|UBE2G2			PTTG1IP::chr21:46293817/-:-000053307|ITGB2::chr21:46340964/-:-000006160|ITGB2::chr21:46330329/-:-000016795|ITGB2::chr21:46340876/-:-000006248|ITGB2::chr21:46330699/-:-000016425|ITGB2::chr21:46327009/-:-000020115|ITGB2::chr21:46348787/-:0000000000|SUMO3::chr21:46238043/-:-000109081|FAM207A::chr21:46359954/+:0000000000|ADARB1::chr21:46591524/+:-000118817|ADARB1::chr21:46494492/+:-000021785|ADARB1::…
chr19:4830994-4832369	1375	promotor	TICAM1	1.49	0.47	2.23	1.42	0.96	1.49	1.23	0.69	1.97	1.72	2.13	3.62	2.91	2.42	0.47	0.85	0.48	0.55	24.37	20.99	10.6	10.15	8.99	10.07	TICAM1	TICAM1|KDM4B|UHRF1|DPP9|MYDGF			TICAM1::chr19:4818527/-:-000012467|TICAM1::chr19:4831753/-:0000000000|TNFAIP8L1::chr19:4639526/+:0000191468|TNFAIP8L1::chr19:4640028/+:0000190966|TNFAIP8L1::chr19:4651878/+:0000179116|KDM4B::chr19:5016267/+:-000183898|KDM4B::chr19:4969123/+:-000136754|KDM4B::chr19:5016267/+:-000183898|KDM4B::chr19:4969123/+:-000136754|UHRF1::chr19:4909441/+:-000077072|UHRF1::chr19:4903091/+:-000070722|UHRF1::chr1…
chr17:43095726-43097435	1709	enhancer	C1QL1|NMT1|ACBD4|EFTUD2|HEXIM1|KIF18B|HEXIM2|GJC1|GFAP	2.27	0.42	2.31	1.39	1.14	1.35	1.05	1.11	0.87	1.57	0.22	0.44	0.35	0.36	-0.07	0.44	0.46	0.15	5.01	3.48	3.9	3.28	3.1	2.56		C1QL1|NMT1|ACBD4|EFTUD2|HEXIM1|KIF18B|HEXIM2|GJC1|GFAP			C1QL1::chr17:43045643/-:-000050083|CCDC103::chr17:42978357/+:0000117369|CCDC103::chr17:42977079/+:0000118647|NMT1::chr17:43138666/+:-000041231|HEXIM2::chr17:43237540/+:-000140105|HEXIM2::chr17:43240113/+:-000142678|HEXIM2::chr17:43239854/+:-000142419|HEXIM2::chr17:43239225/+:-000141790|HEXIM2::chr17:43239211/+:-000141776|HEXIM2::chr17:43240116/+:-000142681|DCAKD::chr17:43112369/-:0000014934|DCAKD…
chr6:5470890-5471930	1040	genebody_intron	FARS2	0.32	-0.19	0.76	0.27	0.44	0.16	0.52	0.51	0.18	0.24	1.12	1.73	1.08	0.49	0.54	0.44	0.48	0.29	-0.02	-0.32	0.05	0.27	-0.09	0.09					FARS2::chr6:5368782/+:0000102108|FARS2::chr6:5368782/+:0000102108
chr5:20678464-20680011	1547	enhancer	CDH18	1	1.87	-0.22	1.55	2.23	1.34	-0.11	0.58	1.45	1.98	4.69	13.3	14.27	11.08	-0.24	1.38	2.36	1.41	-0.68	-0.2	0.59	3.3	5.13	5.8		CDH18			CDH18::chr5:20575981/-:-000102483
chr11:35232047-35233025	978	genebody_exon	CD44	-0.08	0.04	0.48	1.63	0.71	0.03	0.31	1.06	0.68	0.11	8.76	19.2	14.46	4.79	0.44	0.8	0.7	0.14	-0.11	-0.25	-0.06	0.27	0.23	-0.1					CD44::chr11:35160416/+:0000071631|SLC1A2::chr11:35392642/-:0000159617|SLC1A2::chr11:35339062/-:0000106037|SLC1A2::chr11:35344225/-:0000111200|SLC1A2::chr11:35392642/-:0000159617|SLC1A2::chr11:35339062/-:0000106037|SLC1A2::chr11:35344225/-:0000111200
chr1:171050114-171051474	1360	enhancer	FMO2|FMO3|FMO1	-0.27	-0.38	1.09	0.18	-0.09	0.12	0.54	-0.02	-0.07	0.09	0.11	-0.1	-0.16	-0.45	0.38	-0.01	-0.22	0.18	-0.45	-0.09	0.44	-0.08	-0.13	-0.36		FMO2|FMO3|FMO1			FMO2::chr1:171165787/+:-000114313|FMO2::chr1:171173003/+:-000121529|FMO2::chr1:171162473/+:-000110999|FMO2::chr1:171154846/+:-000103372|FMO2::chr1:171154346/+:-000102872|FMO3::chr1:171061793/+:-000010319|FMO3::chr1:171060017/+:-000008543|FMO1::chr1:171227061/+:-000175587|FMO1::chr1:171217609/+:-000166135|FMO1::chr1:171227220/+:-000175746|MROH9::chr1:170904611/+:0000145503|MROH9::chr1:170904635/+:…
chr8:17779239-17781709	2470	promotor	PCM1	-1.24	-1.27	3.53	2.11	1.1	2.52	1.07	1.24	1.42	1.99	1.03	0.89	0.67	0.78	0.18	1.06	0.19	0	43.53	35.87	16	13.39	11.31	16.78	PCM1	MTUS1|FGL1|PCM1			MTUS1::chr8:17658425/-:-000120814|MTUS1::chr8:17613469/-:-000165770|MTUS1::chr8:17580083/-:-000199156|MTUS1::chr8:17579729/-:-000199510|MTUS1::chr8:17658425/-:-000120814|MTUS1::chr8:17613469/-:-000165770|MTUS1::chr8:17580083/-:-000199156|MTUS1::chr8:17579729/-:-000199510|FGL1::chr8:17753046/-:-000026193|FGL1::chr8:17752912/-:-000026327|FGL1::chr8:17743079/-:-000036160|FGL1::chr8:17749315/-:-00002…
chr1:59634569-59658051	23482	enhancer	FGGY	-3.36	-2.44	4.63	4.52	2.06	-0.07	1.16	2.07	2	0.11	11.92	24.22	17.88	7.61	1.67	4.22	1.82	0.81	-6.01	-4.82	1.58	0.58	4.99	-1.67		FGGY			FGGY::chr1:59787207/+:-000129156|FGGY::chr1:59775749/+:-000117698|FGGY::chr1:59762624/+:-000104573
chr6:96022284-96026607	4323	promotor	MANEA	-1.02	-0.78	6.27	3.02	2.26	4.51	1.34	2.06	3.06	2.43	16.64	21.73	23.31	20.14	1.1	1.58	1.27	1.75	45.12	33.98	22.01	22.54	26.99	26.38	MANEA	MANEA			MANEA::chr6:96034277/+:-000007670|MANEA::chr6:96025372/+:0000000000
chr1:204244542-204266443	21901	promotor	PLEKHA6	18.01	12.41	3.7	2.66	3.3	5.36	3.92	3.31	3.62	4.12	12.25	17.68	20.18	14.93	2.24	3.72	4.29	4.42	0.26	1.63	10.39	11.08	30.76	19.49	PLEKHA6	KISS1|GOLT1A|REN|ETNK2		SOX13	KISS1::chr1:204165618/-:-000078924|KISS1::chr1:204162041/-:-000082501|SOX13::chr1:204082042/+:0000162500|PLEKHA6::chr1:204243936/-:-000000606|PLEKHA6::chr1:204329056/-:0000062613|PLEKHA6::chr1:204242867/-:-000001675|PLEKHA6::chr1:204243936/-:-000000606|PLEKHA6::chr1:204329056/-:0000062613|PLEKHA6::chr1:204242867/-:-000001675|PIK3C2B::chr1:204459058/-:0000192615|PIK3C2B::chr1:204439013/-:000017257…
chr20:22664181-22672908	8727	enhancer	FOXA2	2.49	3.08	1.07	1.21	0.55	1.91	-0.01	0.6	0.61	0.72	0.66	3.7	4.12	2.06	0.43	1.06	1.58	0.51	-1.88	-1.16	-0.6	0.81	2.86	2.26		FOXA2		FOXA2	FOXA2::chr20:22565100/-:-000099081|FOXA2::chr20:22564898/-:-000099283|FOXA2::chr20:22566100/-:-000098081
chr19:555557-556803	1246	enhancer	C2CD4C|THEG|HCN2|FSTL3|PALM|ODF3L2|BSG|FGF22|MISP	1.36	1.57	1.16	1.4	0.45	0.42	0.6	0.41	0.69	0.97	3.09	4.64	4.72	4.18	0.41	0.47	0.35	0.67	0.49	0.65	2.72	2.9	1.53	1.34		C2CD4C|THEG|HCN2|FSTL3|PALM|ODF3L2|BSG|FGF22|MISP			PRSS57::chr19:695460/-:0000138657|C2CD4C::chr19:408400/-:-000147157|C2CD4C::chr19:409169/-:-000146388|THEG::chr19:376012/-:-000179545|GZMM::chr19:544033/+:0000011524|GZMM::chr19:547283/+:0000008274|HCN2::chr19:589892/+:-000033089|CDC34::chr19:531732/+:0000023825|FSTL3::chr19:676388/+:-000119585|ODF3L2::chr19:474982/-:-000080575|MADCAM1::chr19:496489/+:0000059068|POLRMT::chr19:633567/-:0000076764|…
chr15:51379213-51437161	57948	promotor	TNFAIP8L3	39.41	26.71	65.77	18.98	5.54	35.82	13.71	15.09	9.6	15.28	32.23	44.2	29.42	29.82	3.5	10.91	8.11	8.86	30.82	7.07	129.15	134.69	111.37	79.83	TNFAIP8L3	GLDN			AP4E1::chr15:51207621/+:0000171592|AP4E1::chr15:51204274/+:0000174939|AP4E1::chr15:51200868/+:0000178345|CYP19A1::chr15:51535146/-:0000097985|CYP19A1::chr15:51630794/-:0000193633|CYP19A1::chr15:51616120/-:0000178959|CYP19A1::chr15:51535146/-:0000097985|CYP19A1::chr15:51630794/-:0000193633|CYP19A1::chr15:51616120/-:0000178959|TNFAIP8L3::chr15:51397472/-:0000000000|GLDN::chr15:51633712/+:-000196551
chr5:119474149-119496660	22511	other		-0.38	0.81	1.12	1.21	1.94	7.7	-1.83	0.77	2.51	3.25	26.65	40.98	42.98	37.55	0.22	2.82	3.5	6.34	-5.87	-4.79	-2.3	1.35	11.09	13.61
chr15:40063327-40076050	12723	promotor	FSIP1	-2.76	-0.98	2.09	1.59	0.13	0.86	1.5	0.65	0.85	1.39	-1.21	-0.87	-1.34	-0.58	0.27	1.22	0.1	0.28	26.34	21.87	7.27	6.43	4.76	7.12	FSIP1	EIF2AK4	EIF2AK4		THBS1::chr15:39873279/+:0000190048|THBS1::chr15:39874029/+:0000189298|EIF2AK4::chr15:40226324/+:-000150274|FSIP1::chr15:40075038/-:0000000000|FSIP1::chr15:40068731/-:0000000000|GPR176::chr15:40121476/-:0000045426|GPR176::chr15:40213092/-:0000137042|GPR176::chr15:40121476/-:0000045426|GPR176::chr15:40213092/-:0000137042
chr1:193583966-193584520	554	genebody_intron	FAM72C|SRGAP2D	0.04	0.23	-0.04	0.21	0.5	0.17	0.21	0.1	0.43	0.24	0.11	0.17	0.61	0.35	0.22	0.31	0.26	0.11	0.03	0.06	0.08	0.25	0.63	0.28
chr2:203240136-203242675	2539	promotor	BMPR2	-0.33	-0.47	2.61	2.09	1.86	1.57	1.91	1.45	2.12	2.09	0.48	0.36	0.42	0.49	0.69	0.53	0.33	0.61	40.88	33.14	18.93	12.21	8.84	12.72	BMPR2	SUMO1	BMPR2		SUMO1::chr2:203103321/-:-000136815|BMPR2::chr2:203241049/+:0000000000|NOP58::chr2:203130514/+:0000109622
chr3:128805900-128806564	664	enhancer	HMCES|KIAA1257|COPG1	1.29	0.23	0.6	0.24	0.1	0.04	0.13	0.14	-0.01	0.28	0	-0.14	-0.01	-0.02	0.15	-0.01	-0.04	-0.05	0.14	-0.17	1.5	0.93	0.02	0.15		HMCES|KIAA1257|COPG1			HMCES::chr3:128998552/+:-000191988|HMCES::chr3:128997816/+:-000191252|HMCES::chr3:128997683/+:-000191119|KIAA1257::chr3:128712985/-:-000092915|KIAA1257::chr3:128712178/-:-000093722|COPG1::chr3:128968452/+:-000161888|CNBP::chr3:128902809/-:0000096245|CNBP::chr3:128890613/-:0000084049|CNBP::chr3:128902809/-:0000096245|CNBP::chr3:128890613/-:0000084049|GP9::chr3:128780336/+:0000025564|GP9::chr3:1287…
chr7:91924086-91925751	1665	promotor	ANKIB1	0.07	-0.09	1.41	0.6	0.21	0.11	0.35	0.37	0.4	0.59	0.41	0.43	0.08	-0.35	0.4	0.4	0.34	0.12	-0.16	-0.39	3.65	5.08	-0.07	-0.06	ANKIB1	LRRD1|KRIT1|GATAD1|CYP51A1		GATAD1	ANKIB1::chr7:91875547/+:0000048539|ANKIB1::chr7:91924202/+:0000000000|ANKIB1::chr7:91875547/+:0000048539|ANKIB1::chr7:91924202/+:0000000000|KRIT1::chr7:91873462/-:-000050624|KRIT1::chr7:91875227/-:-000048859|KRIT1::chr7:91874908/-:-000049178|KRIT1::chr7:91874447/-:-000049639|KRIT1::chr7:91875413/-:-000048673|KRIT1::chr7:91874484/-:-000049602|KRIT1::chr7:91875211/-:-000048875|KRIT1::chr7:91871450/…
chr10:9373237-9373930	693	other		-0.21	-0.09	0.48	0.22	0.07	0.05	0.5	0.28	0.16	0.07	0.2	0.21	-0.01	0.04	0.21	0.25	0.12	0.29	-0.17	0.01	-0.16	-0.27	-0.08	-0.2
chr2:178075840-178078802	2962	promotor	HNRNPA3	-1.11	-1.47	6.37	4.22	3.73	5.68	3.09	2.22	3.83	5.06	3.15	5.15	4.82	4.1	0.03	1.15	0.83	1.35	30.47	29.77	21.24	17.72	20.81	26.79	HNRNPA3	AGPS		NFE2L2	HNRNPA3::chr2:178077421/+:0000000000|AGPS::chr2:178257470/+:-000178668|NFE2L2::chr2:178129858/-:0000051056|NFE2L2::chr2:178128616/-:0000049814|NFE2L2::chr2:178098998/-:0000020196|NFE2L2::chr2:178129858/-:0000051056|NFE2L2::chr2:178128616/-:0000049814|NFE2L2::chr2:178098998/-:0000020196
chr22:36461208-36462872	1664	enhancer	RBFOX2|APOL1	0.39	1.29	3.04	1.89	0.94	1.79	1.98	1.74	1.34	2.27	1.47	1.99	1.08	1.12	0.72	1.09	0.65	0.79	5.83	6.15	8.84	7.84	6.22	6.48		RBFOX2|APOL1			APOL4::chr22:36597933/-:0000135061|APOL4::chr22:36600878/-:0000138006|APOL4::chr22:36598100/-:0000135228|APOL4::chr22:36597933/-:0000135061|APOL4::chr22:36600878/-:0000138006|APOL4::chr22:36598100/-:0000135228|APOL3::chr22:36556836/-:0000093964|APOL3::chr22:36538105/-:0000075233|APOL3::chr22:36562224/-:0000099352|APOL3::chr22:36541646/-:0000078774|APOL3::chr22:36556976/-:0000094104|APOL3::chr22:3…
chr2:19247954-19248769	815	other		0.39	0.57	0.04	0.72	0.3	0.01	0.03	0.32	0.16	0.22	0.62	2.88	2.23	1.12	0.13	0.51	0.23	-0.01	-0.15	0.01	-0.01	0.1	0.12	0.21
chr2:68654239-68654958	719	enhancer	CNRIP1|PPP3R1|APLF	0.75	0.41	0.56	0.2	0.35	0.27	0.52	0.17	0.16	0.51	3.26	1.46	2.94	6.13	0.16	0.13	0.33	1.05	0.12	0.13	-0.04	-0.06	-0.02	0.42		CNRIP1|PPP3R1|APLF			CNRIP1::chr2:68547182/-:-000107057|PLEK::chr2:68592321/+:0000061918|APLF::chr2:68694690/+:-000039732|PPP3R1::chr2:68479650/-:-000174589|FBXO48::chr2:68693601/-:0000038643|FBXO48::chr2:68692309/-:0000037351|FBXO48::chr2:68694389/-:0000039431
chr9:113017114-113020103	2989	promotor	TXN	0.52	-0.09	4.22	3.1	3.12	3.83	2.35	1.72	3.56	3.75	1.05	1.13	1.92	1.2	0.68	1.49	1.11	1.36	53.92	48.05	20.7	14.18	21.8	23.89	TXN	C9orf152			TXN::chr9:113018919/-:0000000000|C9orf152::chr9:112970412/-:-000046702|AKAP2::chr9:112898406/+:0000118708|AKAP2::chr9:112887780/+:0000129334|TXNDC8::chr9:113100163/-:0000080060
chr16:66784524-66786458	1934	promotor	DYNC1LI2	-0.24	-0.78	3.53	3.35	2.01	2.85	1.86	1.36	1.59	2.81	0.17	0.81	0.21	0.53	0.68	0.82	0.34	1.07	34.08	28.91	22.66	16.94	14.54	17.13	DYNC1LI2	CA7|PDP2|CES2|CMTM4		CCDC79	CMTM1::chr16:66600293/+:0000184231|CMTM1::chr16:66600349/+:0000184175|CDH16::chr16:66951980/-:0000165522|CDH16::chr16:66952886/-:0000166428|RRAD::chr16:66959096/-:0000172638|RRAD::chr16:66959105/-:0000172647|RRAD::chr16:66959438/-:0000172980|CA7::chr16:66880932/+:-000094474|CA7::chr16:66878281/+:-000091823|CA7::chr16:66878840/+:-000092382|PDP2::chr16:66918133/+:-000131675|PDP2::chr16:66914382/+:-…
chr1:194673967-194675175	1208	genebody_intron	FAM72C|SRGAP2D	-0.18	-0.39	0.31	0.92	-0.08	-0.05	0.31	0.51	0.16	0.14	3.95	6.11	3.46	2.53	0.45	0.69	0.29	0.12	1.65	0.54	1.06	2.58	1.19	0.38
chrX:135332891-135333830	939	promotor	MAP7D3	-0.3	-0.22	0.76	0.6	0.56	0.63	0.11	0.26	0.52	0.43	-0.04	0.52	0.29	0.44	0.01	0.3	0.32	0.25	9.61	6.4	3.71	2.75	2.89	4.43	MAP7D3	ADGRG4			MAP7D3::chrX:135333737/-:0000000000|MAP7D3::chrX:135338640/-:0000004810|FHL1::chrX:135278912/+:0000053979|FHL1::chrX:135252065/+:0000080826|FHL1::chrX:135251795/+:0000081096|FHL1::chrX:135279054/+:0000053837|FHL1::chrX:135229558/+:0000103333|FHL1::chrX:135288565/+:0000044326|FHL1::chrX:135251454/+:0000081437|FHL1::chrX:135230736/+:0000102155|ADGRG4::chrX:135390927/+:-000057097|ADGRG4::chrX:135386…
chr19:8477692-8510964	33272	promotor	HNRNPM|MARCH2	13.1	9.01	4.67	3.54	0.92	2.07	3.54	2.23	2.91	3.36	2.93	2.84	2.04	3.74	1.46	1.48	0.23	1.06	42	32.93	18.14	9.65	11.11	15.74	HNRNPM|MARCH2	NDUFA7|KANK3|HNRNPM|CD320			NDUFA7::chr19:8386279/-:-000091413|CERS4::chr19:8315959/+:0000161733|CERS4::chr19:8315959/+:0000161733|ZNF414::chr19:8579047/-:0000068083|MYO1F::chr19:8642330/-:0000131366|RPS28::chr19:8386383/+:0000091309|RAB11B::chr19:8455204/+:0000022488|ADAMTS10::chr19:8657079/-:0000146115|ADAMTS10::chr19:8673129/-:0000162165|ADAMTS10::chr19:8670693/-:0000159729|ADAMTS10::chr19:8675619/-:0000164655|ANGPTL4::c…
chr7:80160559-80194720	34161	enhancer	CD36	-0.77	-3.49	53.1	10.53	0.53	15.21	20.49	9.07	5.31	8.61	32.84	43.69	31.26	22.16	7.3	9.83	4.97	6.79	-10.06	-7.8	48.22	28.48	20.7	14.36		CD36			CD36::chr7:80267831/+:-000073111|CD36::chr7:80285855/+:-000091135|CD36::chr7:80275407/+:-000080687|CD36::chr7:80275644/+:-000080924|CD36::chr7:80275968/+:-000081248|CD36::chr7:80231503/+:-000036783|CD36::chr7:80231522/+:-000036802|CD36::chr7:80275403/+:-000080683|CD36::chr7:80275967/+:-000081247|CD36::chr7:80275761/+:-000081041
chr17:40669164-40689757	20593	promotor	NAGLU	30.29	22.52	25.01	11.07	7.4	12.77	13.31	4.92	8.35	13.95	2.26	3.38	2.3	4.03	2.23	4.46	2.1	4.47	21.47	20.41	113.68	93	71.33	72.34	NAGLU	CNTNAP1|COASY|STAT3|TUBG1|TUBG2|PTRF|HSD17B1|MLX		STAT3|MLX	EZH1::chr17:40882935/-:0000193178|EZH1::chr17:40880969/-:0000191212|COASY::chr17:40714629/+:-000024872|COASY::chr17:40714373/+:-000024616|COASY::chr17:40714091/+:-000024334|STAT3::chr17:40540512/-:-000128652|STAT3::chr17:40500534/-:-000168630|STAT3::chr17:40540404/-:-000128760|STAT3::chr17:40500556/-:-000168608|TUBG1::chr17:40761357/+:-000071600|CCR10::chr17:40833844/-:0000144087|PLEKHH3::chr17:4…
chr2:227655705-227668008	12303	promotor	IRS1	5.72	2.28	9.92	4.73	2.96	9.88	4.34	2.9	6.86	7.79	9.37	15.51	13.88	11.02	0.75	3.1	2.04	3.21	21.98	15.48	21.95	17.7	30.67	26.86	IRS1	RHBDD1			IRS1::chr2:227663505/-:0000000000|RHBDD1::chr2:227704124/+:-000036116|RHBDD1::chr2:227702788/+:-000034780|RHBDD1::chr2:227729319/+:-000061311|RHBDD1::chr2:227700670/+:-000032662
chr19:42363031-42389059	26028	promotor	RPS19|ARHGEF1|CD79A	16.89	14.47	7.93	5.73	6.13	9.7	5.21	2.84	5.04	10.67	-0.8	-0.15	0.57	4.33	1.97	0.78	1.38	3.23	88.04	87.66	33.71	24.37	29.31	46.84	RPS19|ARHGEF1|CD79A	LYPD4|ZNF574|CEACAM7		DMRTC2|ZNF574	LYPD4::chr19:42343656/-:-000019375|LYPD4::chr19:42348735/-:-000014296|LYPD4::chr19:42343478/-:-000019553|LYPD4::chr19:42347793/-:-000015238|DMRTC2::chr19:42349085/+:0000013946|DMRTC2::chr19:42351492/+:0000011539|ZNF574::chr19:42580289/+:-000191230|ZNF574::chr19:42582738/+:-000193679|RABAC1::chr19:42463527/-:0000074468|GRIK5::chr19:42569966/-:0000180907|GRIK5::chr19:42569956/-:0000180897|ARHGEF1::…
chr11:111990788-111991716	928	enhancer	PTS|TEX12|PIH1D2|BCO2|TIMM8B	-0.06	0.18	0.3	0.33	0.36	0.73	0.29	0.08	0.71	1.05	1.38	1.58	2.19	3.16	0.18	0.13	0.48	0.64	1.08	1.58	1.22	1.76	3.33	3.74		PTS|TEX12|PIH1D2|BCO2|TIMM8B			IL18::chr11:112025783/-:0000034067|IL18::chr11:112034839/-:0000043123|PLET1::chr11:112131582/-:0000139866|PTS::chr11:112097087/+:-000105371|TEX12::chr11:112038094/+:-000046378|TEX12::chr11:112039975/+:-000048259|PIH1D2::chr11:111944894/-:-000045894|PIH1D2::chr11:111943928/-:-000046860|DLAT::chr11:111895537/+:0000095251|BCO2::chr11:112047088/+:-000055372|BCO2::chr11:112046207/+:-000054491|BCO2::ch…
chr15:34329884-34332223	2339	promotor	AVEN	-0.73	-0.03	4.09	2.81	1.84	4.05	2.33	1.53	1.35	2.77	0.24	0.09	1.03	0.18	-0.15	0.87	0.3	0.22	29.79	22.11	17.51	13.85	17.17	19.65	AVEN	PGBD4|CHRM5|EMC4			PGBD4::chr15:34394273/+:-000062050|AVEN::chr15:34331302/-:0000000000|KATNBL1::chr15:34455890/-:0000123667|KATNBL1::chr15:34502296/-:0000170073|KATNBL1::chr15:34455890/-:0000123667|KATNBL1::chr15:34502296/-:0000170073|CHRM5::chr15:34354843/+:-000022620|CHRM5::chr15:34338740/+:-000006517|CHRM5::chr15:34261088/+:0000068796|CHRM5::chr15:34354843/+:-000022620|CHRM5::chr15:34338740/+:-000006517|CHRM5::…
chr2:109149821-109151868	2047	promotor	LIMS1	-0.82	-0.65	3.35	3.24	2.07	2.21	2.05	1.93	2.74	2.7	1.1	1.97	1.15	1.63	0.59	0.55	0.44	0.56	25.91	20.99	15.5	7.95	9.79	13.56	LIMS1	RANBP2|LIMS1			LIMS1::chr2:109276060/+:-000124192|LIMS1::chr2:109223616/+:-000071748|LIMS1::chr2:109237701/+:-000085833|LIMS1::chr2:109271267/+:-000119399|LIMS1::chr2:109204756/+:-000052888|LIMS1::chr2:109150810/+:0000000000|LIMS1::chr2:109204921/+:-000053053|LIMS1::chr2:109276060/+:-000124192|LIMS1::chr2:109223616/+:-000071748|LIMS1::chr2:109237701/+:-000085833|LIMS1::chr2:109271267/+:-000119399|LIMS1::chr2:10…
chr4:90409953-90414839	4886	enhancer	GPRIN3	-0.23	2.36	1.34	0.35	1.67	4.85	0.59	0.59	1.8	3.35	8.27	16.45	20.43	17.58	0.16	-0.13	1.49	2.87	-0.53	-0.14	2.58	2.3	9.66	9.42		GPRIN3			GPRIN3::chr4:90229160/-:-000180793
chr1:244465960-244466838	878	enhancer	C1orf100|C1orf101	1.53	1.06	0.09	0.65	0.53	0.2	0.04	0.18	-0.02	0.35	-0.16	0.31	0.37	-0.24	0.2	0.21	0.31	0.11	0.18	0	0.4	0.81	0.52	0.1		C1orf100|C1orf101			C1orf100::chr1:244527989/+:-000061151|C1orf100::chr1:244515936/+:-000049098|C1orf101::chr1:244641207/+:-000174369|C1orf101::chr1:244643018/+:-000176180|C1orf101::chr1:244640842/+:-000174004|C1orf101::chr1:244624672/+:-000157834|ADSS::chr1:244615435/-:0000148597
chr7:110039381-110039858	477	other		0.08	0.27	-0.03	0.17	0.45	0.12	0	0.04	0.06	-0.1	0.01	0.58	0.58	0.17	0.01	0.09	0.06	-0.01	-0.07	-0.04	0	0.01	0.1	-0.09
chr5:176972084-176982318	10234	promotor	FAM193B	13.34	9.84	4.44	2.71	1.25	2.33	4.26	3.73	2.91	2.28	17.7	20.42	16.53	16.23	1.66	1.89	0.63	1.33	35.31	24.85	19.85	13.97	7.09	8	FAM193B	PDLIM7|DOK3|TMED9|DDX41|PFN3|B4GALT7|LMAN2|F12|DBN1	GRK6		RGS14::chr5:176784843/+:0000187241|PDLIM7::chr5:176923523/-:-000048561|PDLIM7::chr5:176924605/-:-000047479|GRK6::chr5:176853686/+:0000118398|DDX41::chr5:176943966/-:-000028118|FAM153A::chr5:177175699/-:0000193381|TMED9::chr5:177019212/+:-000036894|PRR7::chr5:176875325/+:0000096759|PRR7::chr5:176881829/+:0000090255|PRR7::chr5:176880956/+:0000091128|PRR7::chr5:176873795/+:0000098289|SLC34A1::chr5:1…
chr17:76966907-76977159	10252	promotor	LGALS3BP	11.74	4.46	3.05	1.42	0.99	2.03	2.6	1.61	0.56	2.33	-0.51	-0.11	-0.26	1.06	0.01	0.09	-0.26	0.43	8.32	4.26	12.13	9.28	8.91	8.93	LGALS3BP	TIMP2|C1QTNF1|CYTH1|CEP295NL|USP36|ENGASE			RBFOX3::chr17:77111829/-:0000134670|TIMP2::chr17:76921471/-:-000045436|C1QTNF1::chr17:77042636/+:-000065477|C1QTNF1::chr17:77030380/+:-000053221|C1QTNF1::chr17:77020157/+:-000042998|C1QTNF1::chr17:77040036/+:-000062877|C1QTNF1::chr17:77019015/+:-000041856|LGALS3BP::chr17:76973295/-:0000000000|LGALS3BP::chr17:76976060/-:0000000000|CANT1::chr17:76994367/-:0000017208|CANT1::chr17:76993725/-:00000165…
chr20:32398402-32400857	2455	promotor	CHMP4B	-0.37	-0.38	2.78	2.63	1.93	2.16	1.51	1.36	1.51	2.07	1.97	2.28	2.41	2.34	0.43	0.71	0.99	0.6	31.68	25.81	15.38	14.82	15.28	12.56	CHMP4B	RALY|E2F1|PXMP4|NECAB3		E2F1|ZNF341	RALY::chr20:32581457/+:-000180600|RALY::chr20:32581457/+:-000180600|E2F1::chr20:32274209/-:-000124193|PXMP4::chr20:32308135/-:-000090267|CHMP4B::chr20:32399109/+:0000000000|ZNF341::chr20:32328707/+:0000069695|ZNF341::chr20:32319565/+:0000078837|C20orf144::chr20:32250091/+:0000148311|ACTL10::chr20:32254303/+:0000144099|NECAB3::chr20:32262263/-:-000136139
chr17:71187350-71190314	2964	promotor	COG1	-0.24	-0.25	2.24	2.2	2.14	3.12	1.21	1.02	1.29	2.72	-0.47	0.06	0.16	0.07	0.09	0.11	0.16	0.13	45.59	43.13	12.37	7.99	10.41	20.53	COG1	SLC39A11|C17orf80			SLC39A11::chr17:71084913/-:-000102437|SLC39A11::chr17:71088852/-:-000098498|C17orf80::chr17:71228760/+:-000038446|C17orf80::chr17:71229358/+:-000039044|C17orf80::chr17:71231614/+:-000041300|C17orf80::chr17:71228371/+:-000038057|CDC42EP4::chr17:71308142/-:0000117828|CDC42EP4::chr17:71282750/-:0000092436|CDC42EP4::chr17:71308142/-:0000117828|CDC42EP4::chr17:71282750/-:0000092436|CPSF4L::chr17:71258…
chr7:36140302-36140940	638	enhancer	EEPD1	0.31	-0.06	0.27	0.57	0.03	0.17	0.19	0.33	0.01	0.04	1.53	2.82	0.83	0.65	0.19	0.24	0.19	0	0	-0.08	0.19	-0.04	0.08	-0.01		EEPD1			EEPD1::chr7:36192835/+:-000051895|EEPD1::chr7:36193741/+:-000052801
chr6:13267228-13270091	2863	genebody_intron	PHACTR1	6.1	4.13	2.36	1.81	0.63	0.02	2.54	1.25	1.12	0.77	10.81	15.19	9.92	7.03	1.17	1.65	1.07	0.19	0.08	-0.07	4.27	4.96	2.34	1.02					LOC100130357::chr6:13295619/-:0000025528|LOC100130357::chr6:13295817/-:0000025726|GFOD1::chr6:13408368/-:0000138277|GFOD1::chr6:13365893/-:0000095802|GFOD1::chr6:13408368/-:0000138277|GFOD1::chr6:13365893/-:0000095802|TBC1D7::chr6:13328814/-:0000058723|TBC1D7::chr6:13327137/-:0000057046
chr8:143743359-143764710	21351	promotor	JRK|PSCA	36.94	21.74	20.02	16.25	10.4	13.82	18.43	14.17	16.07	18.72	10.43	11.72	13.26	9.61	4.09	8.2	6.51	6.52	68.94	45.64	124.96	145.39	116.65	81.03	JRK|PSCA	THEM6|GML|LY6K|ARC			THEM6::chr8:143808620/+:-000043910|LY6D::chr8:143868007/-:0000103297|LYPD2::chr8:143833951/-:0000069241|GML::chr8:143921831/+:-000157121|GML::chr8:143916216/+:-000151506|LY6K::chr8:143781528/+:-000016818|SLURP1::chr8:143823828/-:0000059118|JRK::chr8:143747938/-:0000000000|JRK::chr8:143751411/-:0000000000|LYNX1::chr8:143858437/-:0000093727|LYNX1::chr8:143859263/-:0000094553|LYNX1::chr8:143857536/-…
chr16:27560740-27562022	1282	promotor	GTF3C1|KIAA0556	-0.41	-0.08	0.78	0.87	0.75	0.69	0.83	0.98	1.12	1.54	0.5	0.52	0.54	0.66	0.46	0.61	0.22	0.69	22.44	16.55	3.77	2.23	2.79	3.69	GTF3C1|KIAA0556				GTF3C1::chr16:27561250/-:0000000000|IL21R::chr16:27441376/+:0000119364|IL21R::chr16:27413482/+:0000147258|IL21R::chr16:27414400/+:0000146340|IL21R::chr16:27438578/+:0000122162|KIAA0556::chr16:27561467/+:0000000000
chr10:35895368-35895803	435	promotor	GJD4	0.4	0.26	0.11	0.25	0.46	0.31	0.07	0.15	0.34	0.58	0.3	0.52	1.09	1.42	0.11	0.11	0.1	0.34	0.17	0.06	-0.04	0.06	-0.02	0.13	GJD4				FZD8::chr10:35930361/-:0000034558|GJD4::chr10:35894337/+:0000001031|CCNY::chr10:35790428/+:0000104940|CCNY::chr10:35772331/+:0000123037|CCNY::chr10:35790428/+:0000104940|CCNY::chr10:35772331/+:0000123037
chrX:16803696-16806047	2351	promotor	TXLNG	-1.21	-0.91	1.85	1.73	1.17	1.27	2.36	1.64	1.13	1.99	6.72	11.16	10.23	8.99	1.02	0.71	0.19	0.71	33.59	32.46	8.38	6.28	6.68	10.08	TXLNG	CTPS2|REPS2			CTPS2::chrX:16731101/-:-000072595|CTPS2::chrX:16730800/-:-000072896|CTPS2::chrX:16721063/-:-000082633|CTPS2::chrX:16730339/-:-000073357|TXLNG::chrX:16804554/+:0000000000|RBBP7::chrX:16887977/-:0000081930|RBBP7::chrX:16888533/-:0000082486|SYAP1::chrX:16737706/+:0000065990|REPS2::chrX:16964813/+:-000158766|S100G::chrX:16668280/+:0000135416|S100G::chrX:16669121/+:0000134575
chr7:108164722-108167748	3026	promotor	PNPLA8	-1.65	-1.17	4.1	3.14	1.02	1.85	2.72	1.1	1.61	3.31	8.16	6.5	5.68	8.81	-0.28	0.59	0.77	0.74	69.83	48.2	27.69	12.26	10.64	19.01	PNPLA8	NRCAM|DNAJB9|PNPLA8		THAP5	NRCAM::chr7:108096840/-:-000067882|NRCAM::chr7:108040036/-:-000124686|NRCAM::chr7:108096840/-:-000067882|NRCAM::chr7:108040036/-:-000124686|DNAJB9::chr7:108212160/+:-000044412|DNAJB9::chr7:108210188/+:-000042440|PNPLA8::chr7:108166761/-:0000000000|PNPLA8::chr7:108158744/-:-000005978|PNPLA8::chr7:108168604/-:0000000856|PNPLA8::chr7:108156017/-:-000008705|PNPLA8::chr7:108155890/-:-000008832|PNPLA8:…
chr1:157107592-157109290	1698	promotor	ETV3	-0.78	-0.62	3.19	1.35	1.69	2.03	1.94	0.6	1.31	1.66	0.21	0.37	0.06	0.55	-0.03	0.27	0.08	0.28	29.14	22.98	10.32	8.66	7.1	9.44	ETV3	ARHGEF11|ETV3L		ETV3	ARHGEF11::chr1:157015161/-:-000092431|ETV3::chr1:157106156/-:-000001436|ETV3::chr1:157108176/-:0000000000|ETV3::chr1:157108382/-:0000000000|ETV3L::chr1:157069599/-:-000037993
chr3:49447100-49450817	3717	promotor	RHOA|TCTA	-1.4	-1.06	6.44	4.83	3.6	2.62	4.38	3.28	3.93	4.39	2.35	1.91	1.31	0.73	0.22	0.42	0.11	0.35	69.45	53.96	42.32	25.28	21.59	24.07	RHOA|TCTA	USP4|C3orf62|GPX1|BSN|DAG1|RHOA			NICN1::chr3:49466756/-:0000015939|USP4::chr3:49377535/-:-000069565|CCDC36::chr3:49249198/+:0000197902|C3orf62::chr3:49314507/-:-000132593|GPX1::chr3:49395790/-:-000051310|BSN::chr3:49591921/+:-000141104|DAG1::chr3:49526130/+:-000075313|DAG1::chr3:49514281/+:-000063464|DAG1::chr3:49524686/+:-000073869|DAG1::chr3:49530259/+:-000079442|DAG1::chr3:49547851/+:-000097034|DAG1::chr3:49508397/+:-00005758…
chr1:192774618-192779002	4384	promotor	RGS2	0.58	0.92	1.97	3.75	2.08	2.7	1.22	0.71	2.12	2.5	7.98	13.81	15.87	14.24	-0.26	1.5	0.19	1.92	28.68	19.55	4.58	3.1	8.87	9.32	RGS2				RGS13::chr1:192605267/+:0000169351|RGS13::chr1:192606719/+:0000167899|RGS13::chr1:192607293/+:0000167325|RGS13::chr1:192613460/+:0000161158|RGS2::chr1:192778168/+:0000000000
chr10:126431171-126433830	2659	promotor	FAM53B	-0.48	-0.06	2.77	1.89	1.59	2.4	1.79	1.93	2.65	2.9	0.73	1.31	1.19	0.8	0.62	0.95	0.5	1.33	37.68	31.1	14.42	9.65	12.41	12.65	FAM53B	ZRANB1|FAM175B|FAM53B			ZRANB1::chr10:126630691/+:-000196861|FAM175B::chr10:126490353/+:-000056523|FAM53B::chr10:126395455/-:-000035716|FAM53B::chr10:126432929/-:0000000000|FAM53B::chr10:126395455/-:-000035716|FAM53B::chr10:126432929/-:0000000000|METTL10::chr10:126478906/-:0000045076|METTL10::chr10:126480509/-:0000046679|METTL10::chr10:126477725/-:0000043895
chr8:132851084-132874118	23034	enhancer	EFR3A	7.77	9.41	55.74	14.62	8.37	16.67	9.01	5.8	7.4	2.3	24.45	34.61	22.94	13.66	5.62	11.39	6.03	6.83	-3.36	-1.78	102.06	132.3	69.84	39.52		EFR3A			EFR3A::chr8:132916355/+:-000042237|OC90::chr8:133071626/-:0000197508|OC90::chr8:133067319/-:0000193201
chr4:41288675-41299734	11059	enhancer	LIMCH1|APBB2	0.97	1.82	1.05	2.85	0.34	0.71	1.14	0.56	1.32	0.83	3.23	6.98	6.87	3.47	0.74	1.54	1.37	0.6	-2.62	-2.05	-1.05	1.32	0.49	-0.37		LIMCH1|APBB2			LIMCH1::chr4:41362801/+:-000063067|LIMCH1::chr4:41361623/+:-000061889|LIMCH1::chr4:41496552/+:-000196818|LIMCH1::chr4:41362801/+:-000063067|LIMCH1::chr4:41361623/+:-000061889|LIMCH1::chr4:41496552/+:-000196818|UCHL1::chr4:41258897/+:0000029778|APBB2::chr4:41216634/-:-000072041|APBB2::chr4:41102766/-:-000185909|APBB2::chr4:41145158/-:-000143517|APBB2::chr4:41216634/-:-000072041|APBB2::chr4:4110276…
chr4:97657396-97658303	907	other		-0.41	-0.22	0.72	0.71	0.15	0.31	0.37	0.6	0.69	0.29	0.43	0.79	0.38	0.35	0.33	0.46	0.13	0.12	-0.24	-0.32	2.42	5.25	1.91	0.57
chr12:93984413-93986193	1780	enhancer	CRADD|UBE2N	0.32	0.85	2.73	1.37	0.48	1.58	0.86	0.93	0.83	0.72	0.47	1.62	1.23	1.05	0.08	0.51	0.23	0.46	11.31	9.96	8.01	5.85	4	6.29		CRADD|UBE2N			MRPL42::chr12:93861265/+:0000123148|MRPL42::chr12:93862964/+:0000121449|MRPL42::chr12:93862967/+:0000121446|UBE2N::chr12:93836025/-:-000148388|NUDT4::chr12:93788384/+:0000196029|CRADD::chr12:94071150/+:-000084957|CRADD::chr12:94072544/+:-000086351|SOCS2::chr12:93966460/+:0000017953|SOCS2::chr12:93964174/+:0000020239|SOCS2::chr12:93964756/+:0000019657|SOCS2::chr12:93965456/+:0000018957|SOCS2::chr1…
chr1:10165155-10170246	5091	enhancer	KIF1B|CTNNBIP1|LZIC	9.02	8.18	5.91	2.57	0.84	1.23	3.63	1.44	1.46	1.42	5.97	5.64	3.56	3.48	1.69	1.15	0.75	2.7	2.45	1.34	19.22	14.42	4.5	4.36		KIF1B|CTNNBIP1|LZIC			UBE4B::chr1:10093040/+:0000072115|KIF1B::chr1:10270763/+:-000100517|KIF1B::chr1:10292307/+:-000122061|CTNNBIP1::chr1:9970315/-:-000194840|RBP7::chr1:10057254/+:0000107901|NMNAT1::chr1:10032075/+:0000133080|NMNAT1::chr1:10003485/+:0000161670|NMNAT1::chr1:10002980/+:0000162175|LZIC::chr1:9996684/-:-000168471|LZIC::chr1:10002825/-:-000162330|LZIC::chr1:9996684/-:-000168471|LZIC::chr1:10002825/-:-000…
chr20:47894075-47908582	14507	promotor	ZNFX1	9.56	4.89	10.58	13.2	15.41	12.01	8.38	5.63	12.06	13.02	5.53	8.95	6.18	7.88	1.81	1.64	2.57	2.88	131.21	152.28	44.06	28.01	25.25	40.59	ZNFX1	STAU1			STAU1::chr20:47795780/-:-000098295|STAU1::chr20:47782821/-:-000111254|STAU1::chr20:47804903/-:-000089172|STAU1::chr20:47770607/-:-000123468|STAU1::chr20:47790805/-:-000103270|STAU1::chr20:47795780/-:-000098295|STAU1::chr20:47782821/-:-000111254|STAU1::chr20:47804903/-:-000089172|STAU1::chr20:47770607/-:-000123468|STAU1::chr20:47790805/-:-000103270|KCNB1::chr20:48099180/-:0000190598|DDX27::chr20:4…
chr16:71917078-71930669	13591	promotor	IST1|ZNF821	3.36	4.19	6.62	5.97	3.16	3.94	3.93	3.76	3.97	5.02	1.8	4.32	4.53	3.02	0.42	1.4	0.62	0.86	89.87	71.94	30.67	24.13	20.69	23.38	IST1|ZNF821	AP1G1|DHODH|DHX38|IST1|HPR|PHLPP2|HP		ZNF821	ATXN1L::chr16:71883526/+:0000033552|ATXN1L::chr16:71879893/+:0000037185|ATXN1L::chr16:71881912/+:0000035166|AP1G1::chr16:71823384/-:-000093694|AP1G1::chr16:71842975/-:-000074103|DHODH::chr16:72042642/+:-000111973|DHX38::chr16:72130037/+:-000199368|DHX38::chr16:72127614/+:-000196945|IST1::chr16:71929395/+:0000000000|IST1::chr16:71949528/+:-000018859|IST1::chr16:71955245/+:-000024576|IST1::chr16:71…
chr15:83938608-83957849	19241	promotor	BNC1	19.12	12.54	5.28	6.85	3.72	3.5	8.28	8.13	9.62	8.95	14.9	18.77	10.92	7.45	3.14	5.82	3.59	3.12	18.18	13.27	28.27	34.77	27.29	19.6	BNC1	HDGFRP3|SH3GL3			TM6SF1::chr15:83776323/+:0000162285|HDGFRP3::chr15:83876769/-:-000061839|BNC1::chr15:83952208/-:0000000000|BNC1::chr15:83953467/-:0000000000|SH3GL3::chr15:84115979/+:-000158130|SH3GL3::chr15:84156812/+:-000198963
chr2:211340830-211343004	2174	promotor	LANCL1|CPS1	-0.58	-0.37	1.83	1.82	0.91	1.48	2.02	1.78	1.54	1.16	1.26	1.88	1.9	0.7	0.76	1.03	0.84	0.43	22.71	16.1	7.05	9.28	8.45	7.08	LANCL1|CPS1	CPS1|MYL1			LANCL1::chr2:211341490/-:0000000000|LANCL1::chr2:211341498/-:0000000000|LANCL1::chr2:211341428/-:0000000000|LANCL1::chr2:211341135/-:0000000000|CPS1::chr2:211459231/+:-000116227|CPS1::chr2:211460210/+:-000117206|CPS1::chr2:211421322/+:-000078318|CPS1::chr2:211342405/+:0000000000|CPS1::chr2:211458078/+:-000115074|CPS1::chr2:211459231/+:-000116227|CPS1::chr2:211460210/+:-000117206|CPS1::chr2:211421…
chr9:110250653-110253183	2530	promotor	KLF4	1.86	1.12	2.02	1.91	2.29	2.66	1.83	0.86	2	3.05	0.45	0.77	1.39	0.96	0.13	1.17	0.61	1.24	28.16	23.73	4.76	3.54	7.33	9.65	KLF4			KLF4	KLF4::chr9:110252046/-:0000000000|RAD23B::chr9:110064315/+:0000186338|RAD23B::chr9:110062421/+:0000188232
chr10:99599633-99600639	1006	enhancer	SFRP5|GOLGA7B|AVPI1	0.83	1.81	0.84	0.49	0.4	0.25	0.72	0.49	0.53	0.92	0.45	0.86	0.93	1.19	0.3	0.44	0.23	0.35	0.36	0.64	0.01	-0.05	0.59	0.71		SFRP5|GOLGA7B|AVPI1			ZFYVE27::chr10:99498233/+:0000101400|ZFYVE27::chr10:99496877/+:0000102756|ZFYVE27::chr10:99504485/+:0000095148|ZFYVE27::chr10:99498233/+:0000101400|ZFYVE27::chr10:99496877/+:0000102756|ZFYVE27::chr10:99504485/+:0000095148|SFRP5::chr10:99531755/-:-000067878|CRTAC1::chr10:99790584/-:0000189945|MARVELD1::chr10:99473464/+:0000126169|GOLGA7B::chr10:99609994/+:-000009355|PI4K2A::chr10:99400442/+:000019…
chrX:131623454-131624264	810	promotor	MBNL3	0.12	0.3	0.2	0.04	0.13	0.62	0.11	0.08	0	0.19	0.06	0.15	-0.03	0.02	0.1	0.06	0.03	0.1	2.03	1.83	0.27	0.33	0.23	0.92	MBNL3	MBNL3			MBNL3::chrX:131547602/-:-000075852|MBNL3::chrX:131540419/-:-000083035|MBNL3::chrX:131573717/-:-000049737|MBNL3::chrX:131573599/-:-000049855|MBNL3::chrX:131547635/-:-000075819|MBNL3::chrX:131623995/-:0000000000|MBNL3::chrX:131547602/-:-000075852|MBNL3::chrX:131540419/-:-000083035|MBNL3::chrX:131573717/-:-000049737|MBNL3::chrX:131573599/-:-000049855|MBNL3::chrX:131547635/-:-000075819|MBNL3::chrX:13…
chrX:153596391-153608266	11875	promotor	EMD|FLNA	9.53	5.65	9.9	6.03	5.9	8.74	6.65	1.91	6.29	11.81	0.21	0.06	0.54	1.75	1.75	1.28	0.5	4.13	50.62	43.47	56.33	25.03	25.63	55.78	EMD|FLNA	FAM50A|PLXNA3|ATP6AP1|TAZ|RPL10|IKBKG|GDI1|TEX28			SLC10A3::chrX:153717420/-:0000109154|SLC10A3::chrX:153718696/-:0000110430|SLC10A3::chrX:153719028/-:0000110762|EMD::chrX:153607596/+:0000000000|UBL4A::chrX:153715008/-:0000106742|FAM50A::chrX:153672472/+:-000064206|LAGE3::chrX:153707595/-:0000099329|PLXNA3::chrX:153686620/+:-000078354|PLXNA3::chrX:153688496/+:-000080230|FAM3A::chrX:153744565/-:0000136299|FAM3A::chrX:153741259/-:0000132993|FAM3A::…
chr4:149232086-149233543	1457	genebody_intron	NR3C2	0.81	0.01	0.92	0.54	0.18	0.03	-0.1	0.02	-0.03	0.01	0.86	0.62	0.37	0.39	0.29	0.15	0.28	-0.21	-0.22	-0.38	1.57	0.51	0.06	-0.09				NR3C2	NR3C2::chr4:149363671/-:0000130128|NR3C2::chr4:149358013/-:0000124470
chr7:100099460-100114771	15311	enhancer	MOSPD3|AGFG2|ZCWPW1|C7orf61|PPP1R35|TSC22D4|POP7|FBXO24|PCOLCE|GNB2	18.96	19.32	12.41	9.46	5.56	5.69	6.59	7.5	8.4	6.2	9.33	17.78	15.26	7.68	2.37	6.42	4.47	3.61	1.05	0.25	39.97	62.12	52.56	24.99		MOSPD3|AGFG2|ZCWPW1|C7orf61|PPP1R35|TSC22D4|POP7|FBXO24|PCOLCE|GNB2		TSC22D4	MOSPD3::chr7:100210352/+:-000095581|MOSPD3::chr7:100209724/+:-000094953|MOSPD3::chr7:100210052/+:-000095281|MOSPD3::chr7:100210113/+:-000095342|TFR2::chr7:100239172/-:0000124401|TFR2::chr7:100231272/-:0000116501|MEPCE::chr7:100028652/+:0000070808|MEPCE::chr7:100026412/+:0000073048|MEPCE::chr7:100027253/+:0000072207|MEPCE::chr7:100028237/+:0000071223|GIGYF1::chr7:100286869/-:0000172098|PILRA::chr7…
chr22:20007864-20009287	1423	promotor	ARVCF|TANGO2	0.21	0.02	1.52	0.46	0.5	0.42	0.62	0.84	0.92	0.52	-0.2	-0.31	-0.43	-0.16	0.03	0.75	0.07	0.09	14.65	10.76	7.5	3.51	4.06	5.17	ARVCF|TANGO2	DGCR8|ARVCF|RANBP1|C22orf29|GNB1L|TANGO2|ZDHHC8|TXNRD2			DGCR8::chr22:20067754/+:-000058467|DGCR8::chr22:20073209/+:-000063922|ARVCF::chr22:20004308/-:-000003556|ARVCF::chr22:19998030/-:-000009834|ARVCF::chr22:19978334/-:-000029530|ARVCF::chr22:20004308/-:-000003556|ARVCF::chr22:19998030/-:-000009834|ARVCF::chr22:19978334/-:-000029530|C22orf29::chr22:19842061/-:-000165803|C22orf29::chr22:19842370/-:-000165494|C22orf29::chr22:19840008/-:-000167856|TXNRD…
chr4:71704440-71706378	1938	promotor	GRSF1	-0.54	-0.56	2.53	2.16	1.76	2.1	1.92	1.41	1.2	1.44	0.13	0.8	0.33	0.52	0.55	0.36	0.3	0.51	22.2	16.2	12.67	6.17	6.71	11.6	GRSF1	DCK|MOB1B|IGJ	DCK		UTP3::chr4:71554195/+:0000150245|DCK::chr4:71859264/+:-000152886|GRSF1::chr4:71705219/-:0000000000|GRSF1::chr4:71705626/-:0000000000|GRSF1::chr4:71702030/-:-000002410|RUFY3::chr4:71587558/+:0000116882|RUFY3::chr4:71607343/+:0000097097|RUFY3::chr4:71600062/+:0000104378|RUFY3::chr4:71587558/+:0000116882|RUFY3::chr4:71607343/+:0000097097|RUFY3::chr4:71600062/+:0000104378|MOB1B::chr4:71768056/+:-0000…
chr19:50268529-50270866	2337	promotor	TSKS|AP2A1	2.53	1.6	4.22	1.39	0.34	2.78	2.21	1.76	1.71	3.22	4.56	9.84	7.2	6.2	0.13	1.26	0.54	1.15	21.43	17.62	25.43	22.53	15.87	17.76	TSKS|AP2A1	IRF3|NOSIP|PTOV1|TBC1D17|RRAS|MED25|ATF5		IRF3|ATF5	IRF3::chr19:50169131/-:-000099398|IRF3::chr19:50167929/-:-000100600|IRF3::chr19:50166770/-:-000101759|IRF3::chr19:50168102/-:-000100427|IRF3::chr19:50165873/-:-000102656|IRF3::chr19:50166514/-:-000102015|CPT1C::chr19:50195077/+:0000073452|CPT1C::chr19:50194364/+:0000074165|CPT1C::chr19:50195495/+:0000073034|PRMT1::chr19:50180408/+:0000088121|NUP62::chr19:50432787/-:0000161921|NUP62::chr19:5043279…
chr14:89017262-89030381	13119	promotor	PTPN21|ZC3H14	3.8	2.54	3.23	4.07	3.33	4.39	3.23	4.18	4.48	5.61	0.15	0.65	0.71	1.97	1.03	0.95	1.16	0.42	60.47	46.23	17.91	14.04	16.79	18.29	PTPN21|ZC3H14	ZC3H14			PTPN21::chr14:89016962/-:-000000300|PTPN21::chr14:89021122/-:0000000000|SPATA7::chr14:88851987/+:0000165275|ZC3H14::chr14:89029252/+:0000000000|ZC3H14::chr14:89034382/+:-000004001|ZC3H14::chr14:89060729/+:-000030348|ZC3H14::chr14:89029690/+:0000000000|ZC3H14::chr14:89029994/+:0000000000
chr12:46939802-46958913	19111	enhancer	SLC38A2	5.17	16.73	61.52	21.15	19.62	68.36	17.16	12.55	33.88	37.77	39.85	74.43	78.63	68.36	4.05	13.34	14.06	22.78	-5.03	-3.99	105.4	136.54	167.59	148.32		SLC38A2			SLC38A2::chr12:46766644/-:-000173158|SLC38A2::chr12:46765161/-:-000174641
chr10:5257928-5259794	1866	enhancer	AKR1C2|UCN3|NET1	-0.02	-0.43	1.57	3.83	0.6	0.39	1.04	2.31	1.31	-0.05	3.05	10.97	4.74	0.6	0.33	2.16	1.21	0.27	-0.17	-0.32	2.29	10.38	3.44	-0.15		AKR1C2|UCN3|NET1			TUBAL3::chr10:5446792/-:0000186998|AKR1C2::chr10:5060224/-:-000197704|AKR1C4::chr10:5238797/+:0000019131|UCN3::chr10:5415677/+:-000155883|UCN3::chr10:5406975/+:-000147181|NET1::chr10:5454513/+:-000194719|AKR1C3::chr10:5090957/+:0000166971|AKR1C3::chr10:5136567/+:0000121361|AKR1C3::chr10:5090957/+:0000166971|AKR1C3::chr10:5136567/+:0000121361
chr11:19668063-19706093	38030	enhancer	NAV2	31.98	21.51	7.59	7.64	6.44	6.43	7.34	5.44	9.79	12.53	10.53	18.48	20.73	14.58	-1.04	3.29	4.34	5.02	-0.88	1.17	21.38	44.14	59.53	29.29		NAV2			NAV2::chr11:19734880/+:-000028787
chr16:81299462-81300272	810	enhancer	CMIP|PKD1L2|GAN|C16orf46|GCSH	1.13	0.01	0.44	0.86	0.04	-0.04	0.33	0.52	0.15	-0.06	2.06	2.16	1.42	0.26	0.22	0.62	-0.07	-0.11	0.81	0.13	0.66	0.97	0.14	-0.16		CMIP|PKD1L2|GAN|C16orf46|GCSH			CMIP::chr16:81478774/+:-000178502|CMIP::chr16:81478774/+:-000178502|PKD1L2::chr16:81214966/-:-000084496|GAN::chr16:81348570/+:-000048298|BCO1::chr16:81272295/+:0000027167|C16orf46::chr16:81099885/-:-000199577|C16orf46::chr16:81110871/-:-000188591|C16orf46::chr16:81099885/-:-000199577|C16orf46::chr16:81110871/-:-000188591|GCSH::chr16:81129979/-:-000169483
chr13:31317004-31319149	2145	enhancer	TEX26|MEDAG	4.02	2.5	3.24	2.92	2.38	2.33	1.6	1.15	1.62	2.9	3.56	4.99	4.26	4.85	1.41	1.74	0.89	3.46	3.29	2.37	1.47	0.11	-0.01	1.12		TEX26|MEDAG			TEX26::chr13:31506833/+:-000187684|ALOX5AP::chr13:31287614/+:0000029390|ALOX5AP::chr13:31309644/+:0000007360|ALOX5AP::chr13:31287614/+:0000029390|ALOX5AP::chr13:31309644/+:0000007360|USPL1::chr13:31195209/+:0000121795|USPL1::chr13:31191829/+:0000125175|MEDAG::chr13:31480311/+:-000161162
chr15:85174084-85175654	1570	enhancer	ALPK3|ZNF592	0.17	0.53	1.01	0.93	0.26	1.24	0.9	0.52	0.84	0.74	0.14	0.22	-0.03	0.24	0.32	0.3	0.29	0.14	20.46	15.62	4.99	3.6	3.1	3.45		ALPK3|ZNF592	ALPK3	ZSCAN2	SEC11A::chr15:85259690/-:0000084036|SEC11A::chr15:85234874/-:0000059220|SEC11A::chr15:85258096/-:0000082442|ALPK3::chr15:85359910/+:-000184256|ZNF592::chr15:85325887/+:-000150233|ZNF592::chr15:85307937/+:-000132283|ZNF592::chr15:85291817/+:-000116163|ZNF592::chr15:85321413/+:-000145759|ZNF592::chr15:85325887/+:-000150233|ZNF592::chr15:85307937/+:-000132283|ZNF592::chr15:85291817/+:-000116163|ZNF5…
chr17:47020734-47051165	30431	promotor	GIP|SNF8	23.6	14.18	18.61	6.04	1.79	5.44	6	4.32	2.84	6.73	4.69	5.18	1.09	2.36	1.48	3.11	1.2	1.25	21.82	15.28	56.3	46.51	26.42	25.35	GIP|SNF8	TTLL6|B4GALNT2|IGF2BP1			TTLL6::chr17:46871685/-:-000149049|TTLL6::chr17:46894468/-:-000126266|B4GALNT2::chr17:47218608/+:-000167443|B4GALNT2::chr17:47210130/+:-000158965|B4GALNT2::chr17:47209821/+:-000158656|B4GALNT2::chr17:47210328/+:-000159163|GIP::chr17:47045954/-:0000000000|GIP::chr17:47044614/-:0000000000|CALCOCO2::chr17:46908349/+:0000112385|CALCOCO2::chr17:46925425/+:0000095309|CALCOCO2::chr17:46919059/+:00001016…
chr12:88601630-88602662	1032	enhancer	C12orf50|CEP290	0.6	0.49	0.84	0.53	0.3	0.17	0.59	0.7	0.09	0.26	4.48	4.45	3.08	2.54	0.45	0.53	0.1	0.12	0.06	-0.1	2.16	1.08	0.15	0.3		C12orf50|CEP290			TMTC3::chr12:88536072/+:0000065558|TMTC3::chr12:88542064/+:0000059566|C12orf50::chr12:88423175/-:-000178455|C12orf50::chr12:88420846/-:-000180784|C12orf29::chr12:88429267/+:0000172363|CEP290::chr12:88535110/-:-000066520|CEP290::chr12:88535992/-:-000065638
chr1:56497641-56498736	1095	other		-0.12	-0.08	0.96	0.99	0.91	0.11	0.25	0.35	0.64	0.31	2.49	5.93	5.63	2.36	0.53	0.67	0.63	0.27	-0.14	-0.09	-0.28	0.07	0.02	-0.11
chr6:82853502-82855430	1928	3 prime	IBTK	0.72	1.32	2.02	0.73	0.78	0.82	1.14	0.18	0.35	1.02	1.38	1.09	0.02	0.89	0.34	0.24	0.23	1.3	2.6	1.53	8.23	4.15	1.75	3.11					IBTK::chr6:82950559/-:0000095129|IBTK::chr6:82957470/-:0000102040
chr4:100566505-100577179	10674	enhancer	DAPP1|TRMT10A	4.29	1.53	2.11	1.42	0.22	0.58	2.47	2.24	1.01	1	7.11	9.41	2.75	2.99	1.34	2.01	0.26	0.73	-0.32	-0.64	4.14	3.89	1.6	0.21		DAPP1|TRMT10A			DAPP1::chr4:100737980/+:-000160801|C4orf17::chr4:100432160/+:0000134345|C4orf17::chr4:100434145/+:0000132360|TRMT10A::chr4:100480517/-:-000085988|TRMT10A::chr4:100484824/-:-000081681|TRMT10A::chr4:100485213/-:-000081292|TRMT10A::chr4:100480506/-:-000085999|MTTP::chr4:100485234/+:0000081271|MTTP::chr4:100495965/+:0000070540
chr19:19079814-19081115	1301	enhancer	SLC25A42|COPE|COMP|GDF1|CERS1|ARMC6|HOMER3	0.04	0.85	0.59	0.91	0.88	1.12	0.88	0.39	0.99	1.14	3.07	6.58	5.29	4.34	0.14	0.71	0.46	1.3	-0.25	-0.06	2.32	3.99	2.12	4.1		SLC25A42|COPE|COMP|GDF1|CERS1|ARMC6|HOMER3		MEF2B	DDX49::chr19:19030483/+:0000049331|SLC25A42::chr19:19174802/+:-000093687|SLC25A42::chr19:19206899/+:-000125784|SLC25A42::chr19:19174802/+:-000093687|SLC25A42::chr19:19206899/+:-000125784|MEF2BNB-MEF2B::chr19:19261572/-:0000180457|COPE::chr19:19030198/-:-000049616|COMP::chr19:18902113/-:-000177701|GDF1::chr19:18991243/-:-000088571|GDF1::chr19:19006952/-:-000072862|GDF1::chr19:18981427/-:-000098387…
chr3:142165512-142167577	2065	promotor	XRN1	-0.8	-0.86	1.89	0.86	1.06	1.31	1.61	0.94	1.08	1.54	4.13	7.18	6	4.53	0.34	0.71	0.56	0.22	35.98	28.74	12.15	12.87	10.65	9.58	XRN1	PLS1	ATR		PLS1::chr3:142315228/+:-000147651|PLS1::chr3:142342265/+:-000174688|ATR::chr3:142297667/-:0000130090|XRN1::chr3:142166903/-:0000000000
chr2:121346770-121393824	47054	enhancer	GLI2	35	4.2	23.26	6.94	1.23	0.96	16.45	7.93	1.73	3.87	19.29	16.04	6.2	2.5	5.11	5.26	2.49	1.44	0.93	-2.88	29.31	15.2	1.82	0.2		GLI2		GLI2	GLI2::chr2:121554866/+:-000161042
chr12:59845654-59854652	8998	enhancer	SLC16A7	3.23	2.55	3.47	2.32	0.29	0.1	3.21	1.43	2.14	0.84	4.22	6.37	4.79	3.71	1.31	3.14	1.49	0.23	-1.04	-1.7	7.65	12.26	1.64	0.33		SLC16A7			SLC16A7::chr12:60048932/+:-000194280|SLC16A7::chr12:59989820/+:-000135168|SLC16A7::chr12:60048932/+:-000194280|SLC16A7::chr12:59989820/+:-000135168
chr1:183600657-183605967	5310	promotor	RGL1|ARPC5	-3.35	-1.89	8.93	4.42	1.65	2.44	3.87	2.34	3.88	2.13	16.23	22.07	13.46	11.82	1.09	1.96	0.16	0.67	69.48	46.15	45.61	29.6	15.54	17.98	RGL1|ARPC5	RGL1|NCF2			RGL1::chr1:183666537/+:-000060570|RGL1::chr1:183605181/+:0000000000|RGL1::chr1:183774214/+:-000168247|RGL1::chr1:183711260/+:-000105293|RGL1::chr1:183666537/+:-000060570|RGL1::chr1:183605181/+:0000000000|RGL1::chr1:183774214/+:-000168247|RGL1::chr1:183711260/+:-000105293|NCF2::chr1:183559738/-:-000040919|NCF2::chr1:183559493/-:-000041164|NCF2::chr1:183560055/-:-000040602|SMG7::chr1:183441505/+:00…
chr22:42977491-42978336	845	enhancer	RRP7A|NFAM1	-0.16	-0.32	0.42	0.19	0.28	0.76	0.4	0.16	0.25	0.62	-0.08	0.19	0.16	0.07	0.07	0.01	-0.02	0.18	3.51	3.1	1.23	0.9	1.13	2.73		RRP7A|NFAM1			ATP5L2::chr22:43036606/-:0000058270|CYB5R3::chr22:43032851/-:0000054515|CYB5R3::chr22:43040639/-:0000062303|CYB5R3::chr22:43042706/-:0000064370|CYB5R3::chr22:43045404/-:0000067068|CYB5R3::chr22:43042994/-:0000064658|POLDIP3::chr22:43010967/-:0000032631|SERHL2::chr22:42949867/+:0000027624|RRP7A::chr22:42915828/-:-000061663|NFAM1::chr22:42828400/-:-000149091|A4GALT::chr22:43116875/-:0000138539|A4GA…
chr1:197432897-197433764	867	genebody_intron	CRB1|FAM72C|SRGAP2D	-0.1	0.11	0.52	1.06	0.45	0.32	0.76	0.9	0.81	0.43	10.21	16.2	14.31	9.91	0.65	0.72	0.55	0.28	0.22	0.16	-0.05	0.06	0.17	-0.19					CRB1::chr1:197271569/+:0000161328|CRB1::chr1:197237333/+:0000195564|CRB1::chr1:197273500/+:0000159397|CRB1::chr1:197297551/+:0000135346
chr12:51375077-51381518	6441	enhancer	LETMD1	1.04	0.52	2.09	1.91	0.56	0.19	0.6	1.04	0.45	-0.06	1.94	3.35	1.4	0.64	-0.13	2.89	-0.05	-0.58	-1.32	-1.38	4.51	8.06	0.07	-0.17		LETMD1		TFCP2	LETMD1::chr12:51442081/+:-000060563|SLC11A2::chr12:51403052/-:0000021534|SLC11A2::chr12:51422057/-:0000040539|SLC11A2::chr12:51404548/-:0000023030|SLC11A2::chr12:51419923/-:0000038405|SLC11A2::chr12:51420198/-:0000038680|CSRNP2::chr12:51477453/-:0000095935|CSRNP2::chr12:51470429/-:0000088911|TMPRSS12::chr12:51236700/+:0000138377|TFCP2::chr12:51566925/-:0000185407|METTL7A::chr12:51318533/+:0000056…
chr17:44079766-44080562	796	promotor	STH	-0.07	0.16	0.54	0.23	0.03	0.17	0.1	0.16	0.08	0.39	0.25	0.36	0.33	-0.05	0.26	0.43	0.19	0.24	-0.27	-0.08	0.09	-0.11	0.13	0.09	STH				KANSL1::chr17:44270165/-:0000189603|KANSL1::chr17:44249597/-:0000169035|KANSL1::chr17:44270271/-:0000189709|STH::chr17:44076615/+:0000003151|MAPT::chr17:44039686/+:0000040080|MAPT::chr17:43971747/+:0000108019|MAPT::chr17:44039686/+:0000040080|MAPT::chr17:43971747/+:0000108019|SPPL2C::chr17:43922255/+:0000157511|MGC57346-CRHR1::chr17:43898720/+:0000181046|MGC57346-CRHR1::chr17:43893828/+:000018593…
chr7:97600865-97604858	3993	enhancer	ASNS|LMTK2	2.33	1.65	3.27	1.84	0.96	1.75	1.15	1.42	1.53	1.52	2.96	5.84	4.18	3.76	0.41	0.99	0.48	0.12	25.89	21.12	7.56	7.75	7.27	8.76		ASNS|LMTK2	LMTK2		ASNS::chr7:97501307/-:-000099558|ASNS::chr7:97499124/-:-000101741|ASNS::chr7:97498490/-:-000102375|ASNS::chr7:97501476/-:-000099389|ASNS::chr7:97501853/-:-000099012|ASNS::chr7:97498416/-:-000102449|ASNS::chr7:97501307/-:-000099558|ASNS::chr7:97499124/-:-000101741|ASNS::chr7:97498490/-:-000102375|ASNS::chr7:97501476/-:-000099389|ASNS::chr7:97501853/-:-000099012|ASNS::chr7:97498416/-:-000102449|LMT…
chr5:76381847-76384313	2466	promotor	ZBED3	0.85	0.98	6.3	4.33	1.12	1.95	3.65	3.32	1.9	2.15	10.19	16.52	11.92	9.75	1.06	1.97	0.78	1.04	26.94	14.57	17.95	20.7	7.48	6.1	ZBED3	ZBED3|PDE8B		ZBED3	AGGF1::chr5:76326209/+:0000055638|ZBED3::chr5:76373719/-:-000008128|ZBED3::chr5:76374552/-:-000007295|ZBED3::chr5:76383029/-:0000000000|PDE8B::chr5:76506705/+:-000122392|CRHBP::chr5:76248679/+:0000133168
chr18:68781779-68782427	648	other		0.46	0.16	0.27	0.55	0.23	0.24	0.28	0.26	0.39	0.22	0.2	0.25	0.24	0.12	0.01	0.36	0.38	0	1.88	1.27	0.4	1.01	1.3	0.5
chr1:103740754-103750703	9949	enhancer	COL11A1	-0.13	-0.1	6.95	1	-0.28	0.1	1.04	1.4	0.07	-0.33	9.51	6.7	2.57	2.1	1.64	1.07	0.54	0.47	-1.04	-0.96	3.59	-0.29	-0.79	-0.83		COL11A1			COL11A1::chr1:103574051/-:-000166703
chr5:67255646-67385431	129785	enhancer	PIK3R1	24.28	4.26	159.57	66.02	15.92	23.07	53.39	53.24	29.03	20.58	152.75	238.49	174.2	123.57	32.7	44.54	20.11	21.73	-43.95	-43.28	179.8	164.05	43.04	23.84		PIK3R1			PIK3R1::chr5:67522117/+:-000136686|PIK3R1::chr5:67584251/+:-000198820|PIK3R1::chr5:67511583/+:-000126152
chr22:25289816-25291553	1737	enhancer	KIAA1671|PIWIL3	1.62	1.73	1.1	1.7	1.86	1.1	0.74	0.61	1.59	2.61	6.56	9.94	13.08	10.14	0.58	0.35	1.34	1.71	1	1.45	1.99	1.31	9.66	6.57		KIAA1671|PIWIL3			TMEM211::chr22:25335313/-:0000043760|TMEM211::chr22:25334253/-:0000042700|KIAA1671::chr22:25423940/+:-000132387|PIWIL3::chr22:25158487/-:-000131329|PIWIL3::chr22:25170686/-:-000119130|SGSM1::chr22:25202187/+:0000087629
chr11:12180538-12223207	42669	promotor	MICAL2	47.38	40.59	11.17	11.94	10.99	27.23	13.13	10.99	18.38	30.41	9.93	24.98	23.76	17.89	-0.45	6.91	7.91	7.4	-2.57	1.22	51.76	159.86	169.77	113.49	MICAL2	PARVA|MICALCL|DKK3			MICAL2::chr11:12183625/+:0000000000|MICAL2::chr11:12132122/+:0000048416|MICAL2::chr11:12159936/+:0000020602|PARVA::chr11:12399025/+:-000175818|MICALCL::chr11:12313689/+:-000090482|MICALCL::chr11:12308446/+:-000085239|DKK3::chr11:12030628/-:-000149910|DKK3::chr11:12030916/-:-000149622|DKK3::chr11:12030154/-:-000150384|DKK3::chr11:12030185/-:-000150353
chr5:153195930-153208457	12527	3 prime	GRIA1|FAM114A2	4.06	3.43	8.93	1.04	1.45	4.82	3.08	0.53	0.9	2.93	-0.31	-0.14	-0.48	-0.27	-0.24	0.83	-0.12	0.63	-1.66	-1.36	5.13	2.83	3.57	4.3					GRIA1::chr5:153026487/+:0000169443
chr3:148692289-148693654	1365	enhancer	GYG1|HPS3	0.18	0.43	0.89	0.1	0.29	0.45	0.31	0.23	0.23	0.46	0.8	0.63	0.32	0.69	0.3	0.29	0.14	0.52	0.34	0.31	2.21	1.93	1.44	1.43		GYG1|HPS3			CPA3::chr3:148583042/+:0000109247|HLTF::chr3:148804340/-:0000110686|GYG1::chr3:148709194/+:-000015540|HPS3::chr3:148847370/+:-000153716|CPB1::chr3:148545587/+:0000146702
chr4:140735187-140737908	2721	genebody_intron	MAML3	2.73	1.87	2.54	2.1	0.76	0.67	1.06	1.28	1.3	0.54	2.6	6.14	2.47	1.72	0.26	1.43	1.03	0.31	2.16	1.4	6.41	21.89	9.3	2.72					MGST2::chr4:140616350/+:0000118837|MGST2::chr4:140586921/+:0000148266|MGST2::chr4:140616350/+:0000118837|MGST2::chr4:140586921/+:0000148266
chr15:58751319-58766464	15145	genebody_intron	LOC101928694|LIPC	9.95	12.18	1.82	3.65	2.97	1.44	3.15	0.89	3.88	1.26	6.62	11.97	9.95	5.86	0.95	2.78	4.02	2.94	-3.63	-1.74	3.86	12.09	16.56	9.85					LIPC::chr15:58724174/+:0000027145
chr12:39835455-39838506	3051	promotor	KIF21A	-0.38	0.61	8.11	7.22	4.91	3.73	4.04	3.18	4.56	4.53	3.43	6.34	5.93	4.27	1.22	2.66	1.46	1.02	35.51	32.67	24.33	24.77	19.09	21.82	KIF21A	C12orf40			C12orf40::chr12:40019971/+:-000181465|ABCD2::chr12:40013842/-:0000175336|KIF21A::chr12:39837191/-:0000000000
chr3:154847235-154848526	1291	genebody_intron	MME	0.15	0.09	1.19	0.05	-0.14	-0.27	0.44	0.23	0.01	-0.18	1.47	0.73	0.28	0.03	0.3	-0.02	-0.13	-0.39	-0.21	-0.34	0.43	0.52	-0.02	-0.18					MME::chr3:154798078/+:0000049157|MME::chr3:154801946/+:0000045289|MME::chr3:154797952/+:0000049283|MME::chr3:154797435/+:0000049800|MME::chr3:154797704/+:0000049531|MME::chr3:154798078/+:0000049157|MME::chr3:154801946/+:0000045289|MME::chr3:154797952/+:0000049283|MME::chr3:154797435/+:0000049800|MME::chr3:154797704/+:0000049531
chr10:13141315-13143007	1692	promotor	CCDC3|OPTN	-0.42	-0.23	2.23	1.07	0.87	0.7	1.52	1.15	0.75	1.01	0.04	0.1	-0.02	-0.29	0.39	0.56	0.23	0.42	27.9	20.52	8.28	7.2	5.43	3.54	CCDC3|OPTN	CCDC3|OPTN|MCM10			CCDC3::chr10:13040511/-:-000100804|CCDC3::chr10:13116099/-:-000025216|CCDC3::chr10:13141772/-:0000000000|CCDC3::chr10:13043703/-:-000097612|CCDC3::chr10:13091940/-:-000049375|CCDC3::chr10:13140601/-:-000000714|CCDC3::chr10:13141308/-:-000000007|CCDC3::chr10:13040511/-:-000100804|CCDC3::chr10:13116099/-:-000025216|CCDC3::chr10:13141772/-:0000000000|CCDC3::chr10:13043703/-:-000097612|CCDC3::chr10:1…
chr1:90330299-90332676	2377	enhancer	LRRC8D|ZNF326	2.35	2	2.82	4.44	1.86	1.15	1.49	2.21	4.53	1.71	11.21	20.7	15.91	10.19	1.14	3.83	3.65	1.78	0.68	0.34	10.05	27.53	18.47	5.17		LRRC8D|ZNF326			LRRC8D::chr1:90287479/+:0000042820|LRRC8D::chr1:90398625/+:-000065949|LRRC8D::chr1:90309196/+:0000021103|LRRC8D::chr1:90286572/+:0000043727|LRRC8D::chr1:90287479/+:0000042820|LRRC8D::chr1:90398625/+:-000065949|LRRC8D::chr1:90309196/+:0000021103|LRRC8D::chr1:90286572/+:0000043727|ZNF326::chr1:90460677/+:-000128001|LRRC8C::chr1:90152028/+:0000178271
chr8:95565041-95567198	2157	promotor	KIAA1429	-1.11	-1.04	3.11	2.88	2.21	2.15	1.73	1.32	1.75	2.07	1.42	0.74	1.76	1.53	0.61	0.63	0.72	0.66	38.51	29.4	9.3	10.78	11.34	8.98	KIAA1429	DPY19L4|ESRP1|RAD54B|FSBP			ESRP1::chr8:95653363/+:-000086165|DPY19L4::chr8:95732102/+:-000164904|KIAA1429::chr8:95565745/-:0000000000|RAD54B::chr8:95423542/-:-000141499|RAD54B::chr8:95479782/-:-000085259|RAD54B::chr8:95487342/-:-000077699|RAD54B::chr8:95419947/-:-000145094|RAD54B::chr8:95449179/-:-000115862|FSBP::chr8:95449179/-:-000115862
chr5:25083343-25092970	9627	other		0.58	3.16	4.24	2.83	0.51	2.24	1.88	2.38	0.02	0.11	2.31	2.68	3.86	3.29	1.58	1.99	1.85	1.53	17.77	10.27	21.15	44.08	29.91	19.43
chr13:97900500-97913496	12996	enhancer	MBNL2|RAP2A	15.13	16.22	13.89	10.94	5.85	15.85	3.91	4.26	7.97	8.52	17.92	34.76	30.94	29.47	1.87	8.58	4.46	8.12	12.54	8.67	56.68	107.11	91	73.13		MBNL2|RAP2A			MBNL2::chr13:97927885/+:-000014389|MBNL2::chr13:97874549/+:0000025951|MBNL2::chr13:97927885/+:-000014389|MBNL2::chr13:97874549/+:0000025951|RAP2A::chr13:98086474/+:-000172978
chr12:81155186-81158609	3423	genebody_exon	LINC01490|LINC01490|LINC01490|LINC01490|LINC01490	0.11	0.17	5.42	1.45	0.69	1.54	0.56	0.79	-0.07	0.66	2.02	3.81	2.92	2.07	0.75	0.86	0.46	0.42	-1.05	-1.05	6.72	4.31	2.53	3.01				MYF5|MYF6	LIN7A::chr12:81331693/-:0000173084|MYF5::chr12:81110707/+:0000044479|MYF6::chr12:81101407/+:0000053779
chr10:53427127-53479619	52492	promotor	CSTF2T	11.92	1.32	77.59	11.51	-0.67	11.08	22.92	8.68	-1.07	2.06	44.46	41.84	9.93	17.68	14.33	9.83	-0.85	5.53	34.7	22.62	134.17	75.01	13.83	32.43	CSTF2T				CSTF2T::chr10:53459354/-:0000000000
chr5:90573226-90610700	37474	genebody_exon	LUCAT1|LUCAT1|LUCAT1|LUCAT1|LUCAT1|LUCAT1	17.05	21.35	13.32	11.5	13.73	18.99	5.8	9.29	16.33	13.61	28.03	49.03	51.19	43.88	3.03	6.41	7.73	10.92	6.77	10.94	37.12	57.66	87.05	65.39					ARRDC3::chr5:90679148/-:0000068448
chr14:91615470-91631661	16191	promotor	C14orf159	14.03	6.32	4.29	0.05	-0.39	-0.42	3.8	2.23	-0.16	1.04	7.25	3.87	2.21	2.39	1.55	0.2	-0.03	0.4	-1.14	-1.84	3.8	-1.36	-1.63	-1.73	C14orf159	RPS6KA5	RPS6KA5		C14orf159::chr14:91581043/+:0000034427|C14orf159::chr14:91580978/+:0000034492|C14orf159::chr14:91580356/+:0000035114|C14orf159::chr14:91611564/+:0000003906|C14orf159::chr14:91623982/+:0000000000|C14orf159::chr14:91614917/+:0000000553|C14orf159::chr14:91626609/+:0000000000|C14orf159::chr14:91614124/+:0000001346|C14orf159::chr14:91581043/+:0000034427|C14orf159::chr14:91580978/+:0000034492|C14orf159…
chr12:109011505-109038858	27353	promotor	SELPLG	30.38	15.36	13.89	8.12	4.09	7.21	7.69	5.8	5.39	6.23	17.74	22.25	16.71	11.71	3.22	5.04	3.55	3.53	2.81	-0.49	47.67	53.17	35.52	32.75	SELPLG	TMEM119|SART3			ISCU::chr12:108955238/+:0000056267|ISCU::chr12:108957835/+:0000053670|TMEM119::chr12:108986172/-:-000025333|TMEM119::chr12:108991893/-:-000019612|SELPLG::chr12:109025853/-:0000000000|SELPLG::chr12:109018087/-:0000000000|SELPLG::chr12:109027669/-:0000000000|CORO1C::chr12:109125325/-:0000086467|CORO1C::chr12:109124618/-:0000085760|CORO1C::chr12:109095098/-:0000056240|CORO1C::chr12:109096773/-:00000…
chr1:145427048-145478956	51908	promotor	ANKRD34A|LIX1L|POLR3GL|TXNIP	35.89	26.9	35.24	57.77	25.31	20.95	25.7	67.28	39.54	20.83	26.1	34.17	23.23	22.37	6.89	8.69	4.13	7.58	135.99	75.18	127.89	76.1	69.41	92.03	ANKRD34A|LIX1L|POLR3GL|TXNIP	RNF115|RBM8A|ANKRD35|PIAS3|ITGA10|PEX11B		PIAS3	RNF115::chr1:145610989/+:-000132033|RBM8A::chr1:145507556/+:-000028600|NOTCH2NL::chr1:145248812/+:0000178236|PIAS3::chr1:145575987/+:-000097031|HFE2::chr1:145414692/+:0000012356|HFE2::chr1:145415278/+:0000011770|HFE2::chr1:145413190/+:0000013858|HFE2::chr1:145416312/+:0000010736|ANKRD34A::chr1:145470507/+:0000000000|ANKRD34A::chr1:145472121/+:0000000000|ANKRD34A::chr1:145473208/+:0000000000|ANKRD…
chr3:103946715-103953696	6981	other		-0.46	-0.08	4.1	0.21	-0.33	-0.32	0.61	0.09	-0.29	0.2	0.89	-0.38	-0.76	-0.88	0.48	-0.26	-0.02	-0.54	-1.21	-0.69	2.36	-0.64	-1.29	-1.1
chr7:25137957-25138451	494	enhancer	OSBPL3	0.43	0.09	0.29	0.22	0.43	0.12	0.08	0	0.15	0.43	0.33	0.1	0.26	0.35	0.11	0.06	0.15	0.18	0.12	0.12	0.03	0.23	0.13	0.16		OSBPL3			OSBPL3::chr7:25019830/-:-000118127|OSBPL3::chr7:25019830/-:-000118127|NPVF::chr7:25268104/-:0000129653|CYCS::chr7:25163745/-:0000025294|CYCS::chr7:25164979/-:0000026528|C7orf31::chr7:25218950/-:0000080499|C7orf31::chr7:25219816/-:0000081365
chr7:87920829-87921780	951	promotor	STEAP4	1.71	1.2	0.25	0.73	0.55	0.74	0.47	0.21	0.66	0.26	0.62	1.54	0.61	0.52	0.33	0.58	0.34	0.4	0.02	0.17	1.74	2.95	1.42	0.51	STEAP4	SRI|STEAP4			SRI::chr7:87849398/-:-000071431|SRI::chr7:87856307/-:-000064522|STEAP4::chr7:87913585/-:-000007244|STEAP4::chr7:87920328/-:-000000501|STEAP4::chr7:87936227/-:0000014447
chr6:143544894-143554714	9820	genebody_intron	AIG1	2.49	3.59	-0.03	2.72	2.85	3.05	0.59	1.98	3.82	2.86	1.06	2.24	5.04	2.43	0.73	2.51	3.31	1.88	-1.56	-1.3	-0.74	6.85	12.81	4.76					AIG1::chr6:143381978/+:0000162916|AIG1::chr6:143380499/+:0000164395|AIG1::chr6:143382083/+:0000162811
chr13:55145813-55146693	880	other		0.18	0.22	1	0.39	0.42	0.29	0.07	0.36	0.46	0.19	0.05	0.59	0.65	0.23	0.24	0.17	0.24	0.19	0.37	0.33	3.44	4.52	2.52	2.14
chr1:173420565-173421834	1269	enhancer	PRDX6	0.56	-0.38	0.62	1.76	0.05	-0.21	0.14	0.78	0.53	-0.03	3.74	10.11	3.94	2.63	0.24	0.77	0.4	-0.14	-0.4	-0.58	-0.5	1.35	-0.17	-0.55		PRDX6			SLC9C2::chr1:173572232/-:0000150398|SLC9C2::chr1:173570993/-:0000149159|PRDX6::chr1:173446485/+:-000024651
chr20:45886549-45888334	1785	genebody_intron	ZMYND8	2.05	1.16	0.22	0.49	1.99	1.72	0.24	0.88	0.63	1.46	0.12	0.89	2.36	0.93	-0.02	0.57	1.43	0.63	0.71	1.03	1.42	5.21	14.23	5.71					ZMYND8::chr20:45923522/-:0000035188|ZMYND8::chr20:45984263/-:0000095929|ZMYND8::chr20:45976669/-:0000088335|ZMYND8::chr20:45914569/-:0000026235|ZMYND8::chr20:45985632/-:0000097298|ZMYND8::chr20:45978731/-:0000090397|ZMYND8::chr20:45938947/-:0000050613|ZMYND8::chr20:45920631/-:0000032297|ZMYND8::chr20:45927690/-:0000039356|ZMYND8::chr20:45919017/-:0000030683|ZMYND8::chr20:45916027/-:0000027693
chr14:68647735-68661511	13776	genebody_intron	RAD51B	3.51	1.88	16.67	4.34	0.42	2.94	5.93	2.43	1.5	1.25	12.83	16.11	7.34	5.09	2.89	4.28	0.65	1.71	-1.56	-1.27	18.82	9.68	7.09	6.22
chr19:19701638-19707665	6027	enhancer	TSSK6|ZNF101	5.85	4.58	3.48	2.16	0.82	1.05	1.02	1.21	0.65	1.15	7.17	11.3	9.61	9.94	0.69	1.65	1.31	0.96	1.58	0.85	14.79	10.98	7.75	7.28		TSSK6|ZNF101	TSSK6	ZNF14|PBX4|ZNF101	TSSK6::chr19:19626468/-:-000075170|YJEFN3::chr19:19639669/+:0000061969|ATP13A1::chr19:19774502/-:0000066837|CILP2::chr19:19649073/+:0000052565|ZNF14::chr19:19843920/-:0000136255|NDUFA13::chr19:19627018/+:0000074620|LPAR2::chr19:19739038/-:0000031373|GMIP::chr19:19754475/-:0000046810|GATAD2A::chr19:19576148/+:0000125490|ZNF101::chr19:19778961/+:-000071296|ZNF101::chr19:19789989/+:-000082324|ZNF101…
chr12:123336108-123337225	1117	enhancer	ARL6IP4|OGFOD2|HCAR3|HCAR2|HCAR1	11.17	9.47	0.88	0.22	0.79	0.3	0.78	0.51	0.54	0.73	0.26	0.15	0.22	-0.09	0.19	0.48	0.38	0.54	0.46	0.03	8.88	5.78	6.41	5.28		ARL6IP4|OGFOD2|HCAR3|HCAR2|HCAR1			CCDC62::chr12:123259055/+:0000077053|DENR::chr12:123237367/+:0000098741|DENR::chr12:123238239/+:0000097869|ARL6IP4::chr12:123464606/+:-000127381|ARL6IP4::chr12:123465675/+:-000128450|VPS37B::chr12:123380711/-:0000043486|OGFOD2::chr12:123462988/+:-000125763|OGFOD2::chr12:123459749/+:-000122524|OGFOD2::chr12:123462906/+:-000125681|OGFOD2::chr12:123460799/+:-000123574|OGFOD2::chr12:123462527/+:-0001…
chr11:392754-407538	14784	promotor	PKP3|SIGIRR	16.19	5.57	9.58	3.4	4.17	9.22	1.91	3.91	3.58	6.11	-2.11	-2.82	-2.13	-0.79	-0.06	3.03	0.94	1.72	54.13	51.29	51.55	43.59	54.84	60.83	PKP3|SIGIRR	SIRT3|PTDSS2|RASSF7|IFITM3|BET1L|IFITM5|PHRF1|LRRC56			B4GALNT4::chr11:369794/+:0000022960|ODF3::chr11:196760/+:0000195994|ODF3::chr11:197296/+:0000195458|PTDSS2::chr11:450279/+:-000042741|ANO9::chr11:442010/-:0000034472|HRAS::chr11:534374/-:0000126836|HRAS::chr11:535549/-:0000128011|RIC8A::chr11:207510/+:0000185244|RASSF7::chr11:561449/+:-000153911|RASSF7::chr11:561761/+:-000154223|RASSF7::chr11:560970/+:-000153432|PKP3::chr11:394182/+:0000000000|PK…
chr1:20124820-20127369	2549	promotor	TMCO4	2.21	2.98	4.71	2.7	1.62	3.44	2.34	2.49	1.97	3	0.03	1.8	0.82	0.8	1.39	1.23	1.2	1.57	20.83	14.78	17.13	14.09	14	16.64	TMCO4	OTUD3|TMCO4			PLA2G2A::chr1:20306182/-:0000178813|PLA2G2A::chr1:20305371/-:0000178002|PLA2G2A::chr1:20306931/-:0000179562|PLA2G2A::chr1:20306151/-:0000178782|PLA2G2A::chr1:20305403/-:0000178034|NBL1::chr1:19972259/+:0000152561|NBL1::chr1:19971865/+:0000152955|NBL1::chr1:19970207/+:0000154613|NBL1::chr1:19969722/+:0000155098|NBL1::chr1:19969902/+:0000154918|NBL1::chr1:19981504/+:0000143316|NBL1::chr1:19974103/+…
chr4:106938174-106938926	752	genebody_intron	LOC101929577	0.13	-0.05	0.11	0.71	0.29	0.05	0.07	0.53	0.17	0.22	0.27	1.21	0.42	-0.02	0.29	0.52	0.16	0.06	-0.08	0.04	0	0.2	0.04	-0.22					NPNT::chr4:106816596/+:0000121578
chr22:36747714-36749425	1711	promotor	MYH9	6.73	5.31	1.12	0.69	0.15	0.81	1.45	0.23	1.12	1.44	1.88	2.55	2.3	2.26	0.35	0.14	0.44	0.63	2.54	2.37	7.21	5.59	6.52	8.77	MYH9	APOL4|APOL3|APOL2			MYH9::chr22:36745299/-:-000002415|MYH9::chr22:36784111/-:0000034686|EIF3D::chr22:36922177/-:0000172752|EIF3D::chr22:36925276/-:0000175851|TXN2::chr22:36877686/-:0000128261|FOXRED2::chr22:36903147/-:0000153722|FOXRED2::chr22:36903089/-:0000153664|FOXRED2::chr22:36902469/-:0000153044|APOL4::chr22:36597933/-:-000149781|APOL4::chr22:36600878/-:-000146836|APOL4::chr22:36598100/-:-000149614|APOL4::chr2…
chr4:69676373-69677264	891	promotor	UGT2B10	-0.1	-0.07	0.85	0.41	0	0.18	0.98	0.06	0.04	0.58	2.11	2.01	0.28	0.43	0.39	0.65	0.24	0.21	-0.06	-0.03	0.55	0.77	-0.02	-0.07	UGT2B10	UGT2B15|UGT2B10			UGT2B10::chr4:69683746/+:-000006482|UGT2B10::chr4:69681710/+:-000004446|UGT2B10::chr4:69683746/+:-000006482|UGT2B10::chr4:69681710/+:-000004446|UGT2A3::chr4:69817508/-:0000140244|UGT2B15::chr4:69536493/-:-000139880
chr1:169496482-169509101	12619	enhancer	NME7|SLC19A2|CCDC181	1.58	0.96	1.44	4.56	1.56	-0.27	1.11	2.21	0.7	-0.22	5.27	11.82	4.75	2.29	1.22	3.12	0.9	0.63	-1.48	-2	0.1	5.07	-0.17	-1.01		NME7|SLC19A2|CCDC181	NME7		SELL::chr1:169680842/-:0000171741|SLC19A2::chr1:169455207/-:-000041275|NME7::chr1:169337200/-:-000159282|NME7::chr1:169337200/-:-000159282|F5::chr1:169555768/-:0000046667|SELE::chr1:169702800/-:0000193699|SELE::chr1:169703219/-:0000194118|BLZF1::chr1:169337193/+:0000159289|BLZF1::chr1:169338710/+:0000157772|CCDC181::chr1:169429906/-:-000066576|CCDC181::chr1:169429101/-:-000067381|CCDC181::chr1:16…
chr12:29834094-29836829	2735	genebody_intron	TMTC1	0.97	3.58	1.82	0.93	1.53	3.37	0.76	0.94	1.71	1.13	0.82	1.86	3.58	3.4	0.42	1.14	1.39	1.38	1.83	0.74	3.21	6.62	6.76	4.73					TMTC1::chr12:29921007/-:0000084178|TMTC1::chr12:29936742/-:0000099913|TMTC1::chr12:29937691/-:0000100862
chr11:116828909-116829585	676	promotor	SIK3	0.33	0.26	0.02	0.55	0.02	-0.15	0.24	-0.02	0.02	0.03	0.09	0.73	0.36	0.23	-0.11	0.28	0.03	0.11	0.05	-0.05	0.17	1.12	0.57	0.04	SIK3	BUD13|SIK3|ZPR1|APOA4|APOA5|APOA1|PAFAH1B2	SIK3		BUD13::chr11:116643713/-:-000185196|SIK3::chr11:116969130/-:0000139545|SIK3::chr11:116798095/-:-000030814|SIK3::chr11:116824822/-:-000004087|SIK3::chr11:116820971/-:-000007938|SIK3::chr11:116827779/-:-000001130|SIK3::chr11:116969130/-:0000139545|SIK3::chr11:116798095/-:-000030814|SIK3::chr11:116824822/-:-000004087|SIK3::chr11:116820971/-:-000007938|SIK3::chr11:116827779/-:-000001130|SIK3::chr11:1…
chr1:66763427-66764746	1319	enhancer	PDE4B	0.58	0.23	0.58	1.41	0.29	0.18	0.33	0.45	0.44	0.13	0.84	2.47	0.7	-0.14	0.48	1.11	0.23	0.08	-0.04	-0.18	0.51	2.69	0.44	-0.03		PDE4B			PDE4B::chr1:66820060/+:-000055314|PDE4B::chr1:66797790/+:-000033044|PDE4B::chr1:66820060/+:-000055314|PDE4B::chr1:66797790/+:-000033044
chr1:7708682-7709726	1044	enhancer	PER3|VAMP3	1.81	0.32	1.03	0.86	0.15	-0.02	0.68	0.76	-0.03	0.07	4.16	5.17	2.64	1.72	0.46	1.01	0.04	0.13	-0.06	-0.07	0.82	0.39	-0.15	-0.07		PER3|VAMP3			PER3::chr1:7854019/+:-000144293|PER3::chr1:7845500/+:-000135774|PER3::chr1:7844713/+:-000134987|PER3::chr1:7863106/+:-000153380|PER3::chr1:7848104/+:-000138378|PER3::chr1:7846780/+:-000137054|PER3::chr1:7861172/+:-000151446|PER3::chr1:7844488/+:-000134762|PER3::chr1:7858520/+:-000148794|VAMP3::chr1:7831328/+:-000121602
chr5:75668182-75669201	1019	enhancer	IQGAP2	1.62	1.62	0.32	0.75	0.65	0.15	0.62	0.26	0.76	0.45	0.14	0.83	0.45	0.26	0.24	0.5	0.45	0.32	0.07	0.25	1.04	1.8	1.45	0.58		IQGAP2			IQGAP2::chr5:75843233/+:-000174032|IQGAP2::chr5:75699079/+:-000029878|IQGAP2::chr5:75858220/+:-000189019|IQGAP2::chr5:75843233/+:-000174032|IQGAP2::chr5:75699079/+:-000029878|IQGAP2::chr5:75858220/+:-000189019
chr4:190215532-190226761	11229	other		1.66	0.11	2.23	1.12	0.61	-0.18	1.35	1.01	-0.35	-0.06	6.66	8.63	4.79	2.76	0.61	0.59	0.07	0.26	-1.4	-1.51	3.88	3.39	-0.5	-0.23
chr18:38447260-38448776	1516	other		0.99	0.83	0.12	1.1	1.39	0.78	0.56	0.24	2.11	1.1	3.99	10.77	14.05	11.46	-0.07	1.02	1.31	1.37	-0.37	-0.39	0.2	0.59	1.7	0.65
chr2:197560630-197561773	1143	enhancer	HECW2	0.68	1.31	0.92	0.52	0.4	0.39	0.39	0.51	0.37	0.31	3.02	5.74	4.13	3.36	0.17	0.35	0.31	0.39	-0.06	0	1.92	4.67	1.7	0.33		HECW2			GTF3C3::chr2:197664491/-:0000102718|CCDC150::chr2:197504355/+:0000056275|C2orf66::chr2:197674999/-:0000113226|HECW2::chr2:197457334/-:-000103296
chr15:75110781-75111459	678	enhancer	SCAMP5|CYP1A1|CPLX3|MPI|EDC3	1.61	1.23	0.05	0.14	0.43	0.37	0.16	0.15	0.37	0.24	-0.05	0.11	0.25	0.27	-0.11	0.2	0.22	0.16	0.04	0.07	0.18	0.33	0.25	0.64		SCAMP5|CYP1A1|CPLX3|MPI|EDC3	ULK3|CSK		CYP1A1::chr15:75017876/-:-000092905|CYP1A1::chr15:75015463/-:-000095318|CYP1A2::chr15:75041183/+:0000069598|CYP1A2::chr15:75042070/+:0000068711|SCAMP5::chr15:75287875/+:-000176416|SCAMP5::chr15:75302231/+:-000190772|SCAMP5::chr15:75289574/+:-000178115|SCAMP5::chr15:75304132/+:-000192673|SCAMP5::chr15:75287875/+:-000176416|SCAMP5::chr15:75302231/+:-000190772|SCAMP5::chr15:75289574/+:-000178115|SCA…
chr3:93780605-93782737	2132	promotor	NSUN3|DHFRL1	-0.75	-0.62	2.6	1.95	1.29	2.26	1.54	1.03	1.56	1.09	0.87	1.47	0.85	0.81	0.06	0.99	0.28	0.55	35.59	27.01	16.32	15	13.98	14.98	NSUN3|DHFRL1	STX19|PROS1			STX19::chr3:93747453/-:-000033152|STX19::chr3:93734125/-:-000046480|ARL13B::chr3:93698982/+:0000081623|ARL13B::chr3:93722502/+:0000058103|ARL13B::chr3:93698982/+:0000081623|ARL13B::chr3:93722502/+:0000058103|NSUN3::chr3:93781854/+:0000000000|PROS1::chr3:93692933/-:-000087672|DHFRL1::chr3:93780449/-:-000000156|DHFRL1::chr3:93781830/-:0000000000|DHFRL1::chr3:93782066/-:0000000000
chr4:56759435-56760697	1262	enhancer	CEP135	0.8	0.89	1.14	1.67	0.75	0.34	1.05	0.18	0.77	0.52	6.25	7.16	5.73	4.55	0.78	0.83	0.31	0.24	-0.22	-0.27	1.7	1.98	0.38	0.5		CEP135			EXOC1::chr4:56724479/+:0000034956|EXOC1::chr4:56719815/+:0000039620|CEP135::chr4:56814973/+:-000054276|CEP135::chr4:56818251/+:-000057554
chr1:12585123-12589220	4097	enhancer	AADACL3	6.25	1.77	4.37	3.77	1	1.05	2.06	2.44	1.39	0.54	13.27	20.61	13.38	9.94	1.08	2.24	0.78	1.38	0.39	-0.32	6.04	10.05	3.75	1.32		AADACL3			DHRS3::chr1:12677736/-:0000088516|AADACL3::chr1:12776117/+:-000186897
chr12:27329463-27352007	22544	enhancer	C12orf71|ARNTL2|TM7SF3|STK38L	13.58	9.68	23.88	5.75	3.71	4.44	7.3	0.96	2.27	2.28	13.26	15.66	15.92	17.03	4.19	5.47	2.79	6.96	-0.13	-1.23	46.42	19.75	3.75	10.58		C12orf71|ARNTL2|TM7SF3|STK38L	STK38L	ARNTL2	MED21::chr12:27175454/+:0000154009|C12orf71::chr12:27235454/-:-000094009|ARNTL2::chr12:27485786/+:-000133779|TM7SF3::chr12:27167338/-:-000162125|STK38L::chr12:27397077/+:-000045070|STK38L::chr12:27450642/+:-000098635|STK38L::chr12:27397077/+:-000045070|STK38L::chr12:27450642/+:-000098635
chr4:175441500-175442558	1058	promotor	HPGD	0.08	0.49	1.68	0.59	0.06	0.76	0.88	0.52	0.32	0.28	2.63	4.18	2.38	2.86	0.48	0.62	0.95	1.24	0.44	0.19	0.78	0.53	0.75	0.56	HPGD	HPGD			HPGD::chr4:175439227/-:-000002273|HPGD::chr4:175444043/-:0000001485|HPGD::chr4:175429942/-:-000011558|HPGD::chr4:175443217/-:0000000659|HPGD::chr4:175444048/-:0000001490
chr2:128784159-128785814	1655	promotor	SAP130	-0.47	-0.62	0.79	0.98	0.59	0.75	1.23	0.79	1.11	1.14	0.21	0.26	-0.22	-0.11	0.2	0.77	0.3	0.19	21.81	17.82	6.85	2.36	3.16	6.65	SAP130	POLR2D|AMMECR1L|UGGT1			POLR2D::chr2:128615728/-:-000168431|AMMECR1L::chr2:128643513/-:-000140646|AMMECR1L::chr2:128631845/-:-000152314|AMMECR1L::chr2:128641885/-:-000142274|AMMECR1L::chr2:128642433/-:-000141726|SAP130::chr2:128784868/-:0000000000|UGGT1::chr2:128848753/+:-000062939
chr19:6459152-6461049	1897	promotor	CRB3|SLC25A23	2.05	1.18	1.63	1.44	1.04	0.9	2.08	0.9	0.91	2.14	1.36	1.29	1.29	2.01	0.36	1.26	0.54	0.72	24.61	16.37	6.85	2.53	2.49	4.15	CRB3|SLC25A23	SLC25A41|ACER1|GTF2F1|KHSRP|MLLT1|TNFSF9			GTF2F1::chr19:6393290/-:-000065862|ACER1::chr19:6333639/-:-000125513|CD70::chr19:6591162/-:0000130113|SLC25A41::chr19:6433789/-:-000025363|CLPP::chr19:6361462/+:0000097690|TUBB4A::chr19:6502594/-:0000041545|TUBB4A::chr19:6501407/-:0000040358|TUBB4A::chr19:6501590/-:0000040541|TUBB4A::chr19:6502272/-:0000041223|TUBB4A::chr19:6502858/-:0000041809|KHSRP::chr19:6424821/-:-000034331|MLLT1::chr19:62799…
chr1:219214333-219215289	956	enhancer	LYPLAL1	0.4	0.61	-0.02	0.05	0.36	0.9	0.02	-0.02	0.61	-0.02	0.1	0.28	1.31	0.62	0.19	0.24	0.51	0.22	-0.11	0.02	-0.19	0.34	0.71	1.01		LYPLAL1			LYPLAL1::chr1:219348310/+:-000133021|LYPLAL1::chr1:219352488/+:-000137199|LYPLAL1::chr1:219347512/+:-000132223|LYPLAL1::chr1:219347172/+:-000131883
chr8:133786658-133788471	1813	promotor	PHF20L1	-0.62	-0.28	2.07	1.24	0.65	1.52	1.3	1.43	0.94	1.57	0.13	-0.1	0.07	0.52	0.11	0.34	0.52	0.71	20.32	14.72	6.86	4.21	3.25	6.2	PHF20L1	TMEM71|LRRC6|TG			TG::chr8:133879204/+:-000090733|LRRC6::chr8:133687862/-:-000098796|PHF20L1::chr8:133787603/+:0000000000|PHF20L1::chr8:133790037/+:-000001566|PHF20L1::chr8:133790041/+:-000001570|TMEM71::chr8:133772913/-:-000013745|TMEM71::chr8:133771160/-:-000015498
chr6:22072789-22074477	1688	genebody_intron	CASC15	0.12	-0.61	1.82	2.41	0.4	0.48	0.26	0.93	-0.03	0.25	7.36	11.22	6.58	5.23	0.45	1.81	0.52	0.52	-0.41	-0.49	0.55	1.41	0	0.07
chr9:140304810-140319856	15046	promotor	NOXA1|EXD3	23.12	16.57	10.4	5.24	4.75	10.01	7.49	4.93	6.76	11.67	1.6	0.65	0.42	1.38	1	1.99	1.18	3.94	38.62	33.98	56.47	46.03	53.71	70.2	NOXA1|EXD3	EHMT1|ARRDC1|FAM166A|MRPL41|NRARP|EXD3|RNF208			EHMT1::chr9:140513443/+:-000193587|NRARP::chr9:140196702/-:-000108108|DPH7::chr9:140473386/-:0000153530|NELFB::chr9:140149758/+:0000155052|FAM166A::chr9:140142243/-:-000162567|SLC34A3::chr9:140126115/+:0000178695|SLC34A3::chr9:140126112/+:0000178698|SLC34A3::chr9:140125384/+:0000179426|SLC34A3::chr9:140125208/+:0000179602|C9orf173::chr9:140145712/+:0000159098|ENTPD8::chr9:140332756/-:0000012900|E…
chr22:29278649-29280420	1771	enhancer	ZNRF3|CHEK2|KREMEN1|XBP1	-0.28	0.04	1.12	0.47	0.88	1.05	1.2	0.3	0.86	1.5	0.05	0.6	0.18	0.39	0.32	0.23	0.42	0.34	14.23	12.84	3.06	1.22	2.72	5.26		ZNRF3|CHEK2|KREMEN1|XBP1	CHEK2	XBP1	HSCB::chr22:29138042/+:0000140607|ZNRF3::chr22:29313376/+:-000032956|CCDC117::chr22:29169124/+:0000109525|CCDC117::chr22:29169712/+:0000108937|CCDC117::chr22:29168661/+:0000109988|CCDC117::chr22:29176935/+:0000101714|C22orf31::chr22:29457906/-:0000177486|CHEK2::chr22:29121354/-:-000157295|CHEK2::chr22:29115472/-:-000163177|CHEK2::chr22:29121111/-:-000157538|CHEK2::chr22:29130714/-:-000147935|CHEK…
chr5:139104258-139107654	3396	enhancer	PSD2	8.72	5.68	0.8	1.8	0.85	-0.23	0.31	0.62	0.71	0.1	1.51	3.64	1.85	1.62	0.67	1.65	0.4	-0.01	-0.3	-0.29	3.69	11.61	4.67	1.19		PSD2			PSD2::chr5:139175405/+:-000067751|PSD2::chr5:139188975/+:-000081321|UBE2D2::chr5:138940750/+:0000163508|UBE2D2::chr5:138979956/+:0000124302|UBE2D2::chr5:138941828/+:0000162430|CXXC5::chr5:139028300/+:0000075958|CXXC5::chr5:139059948/+:0000044310
chr2:242295391-242296485	1094	promotor	FARP2	-0.29	-0.37	1.14	1.07	0.7	0.78	1.19	0.72	2.24	1.22	0.16	0.3	0	-0.16	0.4	0.95	0.32	0.22	15.66	13.55	4.32	1.57	1.93	4.6	FARP2	HDLBP|FARP2	STK25		HDLBP::chr2:242207122/-:-000088269|HDLBP::chr2:242206320/-:-000089071|HDLBP::chr2:242212245/-:-000083146|HDLBP::chr2:242255114/-:-000040277|HDLBP::chr2:242207955/-:-000087436|ANO7::chr2:242127923/+:0000167468|FARP2::chr2:242295663/+:0000000000|FARP2::chr2:242312498/+:-000016013|FARP2::chr2:242295663/+:0000000000|FARP2::chr2:242312498/+:-000016013|STK25::chr2:242440210/-:0000143725|STK25::chr2:242…
chr14:29731911-29732801	890	other		0.22	0.76	-0.09	0.44	0.22	0.65	-0.08	0.52	0.28	0.3	0.12	0.82	0.44	0.08	0.28	0.23	0.32	0.35	-0.12	-0.03	0.06	1.04	0.92	0.77
chr11:69338949-69339918	969	enhancer	CCND1	1.5	1.79	0.24	0.47	0.56	0.61	0.45	0.26	0.9	1.11	-0.01	0.25	0.32	0.19	0.26	0.21	0.6	0.33	0.74	0.71	1.07	1.48	3.65	2.18		CCND1			CCND1::chr11:69455872/+:-000115954|FGF19::chr11:69519105/-:0000179187|ORAOV1::chr11:69490164/-:0000150246
chr10:123810825-123811779	954	enhancer	TACC2|NSMCE4A|ATE1	1.89	2.23	0.67	0.58	0.45	0.23	0.79	0.36	0.76	0.73	0.67	0.46	0.16	0.34	0.14	0.38	0.26	0.06	0	0.24	1.22	0.68	1.05	1.34		TACC2|NSMCE4A|ATE1			TACC2::chr10:123922940/+:-000111161|TACC2::chr10:123748688/+:0000062137|TACC2::chr10:123969388/+:-000157609|TACC2::chr10:123872553/+:-000060774|TACC2::chr10:123892123/+:-000080344|TACC2::chr10:123781451/+:0000029374|TACC2::chr10:123954554/+:-000142775|TACC2::chr10:123969911/+:-000158132|TACC2::chr10:123922940/+:-000111161|TACC2::chr10:123748688/+:0000062137|TACC2::chr10:123969388/+:-000157609|TAC…
chr1:212587226-212588960	1734	promotor	TMEM206	0.33	0.53	1.11	0.95	0.69	0.84	0.68	0.83	0.65	0.91	-0.17	-0.01	0.03	0.02	0.39	0.77	0.49	0.25	18.36	16.46	3.21	2.02	2.7	4.34	TMEM206	ATF3|NENF		ATF3	TMEM206::chr1:212588242/-:0000000000|TMEM206::chr1:212588266/-:0000000000|NENF::chr1:212606228/+:-000017268|PPP2R5A::chr1:212475147/+:0000112079|PPP2R5A::chr1:212458878/+:0000128348|ATF3::chr1:212738675/+:-000149715|ATF3::chr1:212781969/+:-000193009|ATF3::chr1:212788382/+:-000199422|ATF3::chr1:212788407/+:-000199447|ATF3::chr1:212788359/+:-000199399|ATF3::chr1:212784181/+:-000195221
chr9:125023303-125028461	5158	promotor	MRRF|RBM18	2.73	0.63	3.47	2.18	0.96	2.26	2.78	0.82	1.36	2.2	2.04	0.97	-0.83	0.64	-0.11	0.77	-0.12	0.78	47.57	42.24	17.7	12.48	12.42	15.76	MRRF|RBM18	PTGS1|LHX6|NDUFA8|TTLL11		LHX6	MORN5::chr9:124922186/+:0000101117|PTGS1::chr9:125133464/+:-000105003|PTGS1::chr9:125140206/+:-000111745|PTGS1::chr9:125133283/+:-000104822|PTGS1::chr9:125140177/+:-000111716|PTGS1::chr9:125140711/+:-000112250|PTGS1::chr9:125133891/+:-000105430|PTGS1::chr9:125137600/+:-000109139|PTGS1::chr9:125132808/+:-000104347|MRRF::chr9:125026881/+:0000000000|MRRF::chr9:125033142/+:-000004681|LHX6::chr9:12499…
chr5:97584512-97585145	633	other		-0.01	0.25	0.19	0.22	0.42	0.33	0.02	-0.09	0.39	0.09	2.61	4.06	5.52	3.48	0.05	0.04	0.17	0.26	-0.23	-0.12	-0.22	-0.15	0.63	0.3
chr6:155738187-155740430	2243	enhancer	TFB1M	-0.07	-0.04	2.75	3.57	2.04	2.8	0.52	0.79	2.26	1.74	10.94	17.54	14.76	11.97	0.37	2.45	2.15	2.88	2.39	1.49	1.75	4.15	11.06	5.54		TFB1M			NOX3::chr6:155777036/-:0000036606|CLDN20::chr6:155596749/+:0000141438|CLDN20::chr6:155585146/+:0000153041|TIAM2::chr6:155561663/+:0000176524|TFB1M::chr6:155635616/-:-000102571
chr16:30609143-30622466	13323	promotor	ZNF689	4.09	4.34	3.73	3.06	1.99	4.29	0.98	2.6	1.94	2.98	4.74	5.77	6.94	6.15	0.75	1.2	0.63	1.42	23.72	23.57	12.81	12.53	12.46	17.29	ZNF689	ZNF747|SRCAP|ZNF688|PRR14|SEPHS2|DCTPP1|RNF40|FBRS|TMEM265|ZNF768|ZNF785|ZNF764|PHKG2	PHKG2	ZNF688|ZNF689|ZNF629|ZNF768|ZNF785|ZNF764|ZNF771	SRCAP::chr16:30711936/+:-000089470|SRCAP::chr16:30710461/+:-000087995|SRCAP::chr16:30711228/+:-000088762|ZNF747::chr16:30546290/-:-000062853|ZNF688::chr16:30583727/-:-000025416|ZNF689::chr16:30621706/-:0000000000|ZNF629::chr16:30798522/-:0000176056|ZNF629::chr16:30795835/-:0000173369|SEPHS2::chr16:30457295/-:-000151848|LOC730183::chr16:30709809/-:0000087343|ZNF785::chr16:30597091/-:-000012052|RNF…
chr22:50219972-50221871	1899	promotor	BRD1	0.27	-0.2	1.56	1.31	0.92	1.25	0.93	1.32	0.66	1.65	-0.08	0.2	-0.13	0.08	0.07	0.12	0.25	0.22	22.72	16.41	7.21	6.28	7.5	7.95	BRD1	ZBED4|PIM3|CRELD2|C22orf34	PIM3	ZBED4	ZBED4::chr22:50247496/+:-000025625|ZBED4::chr22:50276981/+:-000055110|PIM3::chr22:50354142/+:-000132271|CRELD2::chr22:50312277/+:-000090406|ALG12::chr22:50312105/-:0000090234|ALG12::chr22:50307490/-:0000085619|BRD1::chr22:50218451/-:-000001521|BRD1::chr22:50219547/-:-000000425|BRD1::chr22:50221195/-:0000000000|BRD1::chr22:50217978/-:-000001994|C22orf34::chr22:50051189/-:-000168783|C22orf34::chr22…
chr8:125858917-125885557	26640	enhancer	ZNF572|MTSS1|SQLE	11.84	7.17	37.3	4.16	5.14	8.39	12.39	4.53	5.92	7.88	16.94	10.88	13.52	12.17	6.61	2.65	3.67	6.28	-4.86	-5.23	55.77	17.59	25.47	26.24		ZNF572|MTSS1|SQLE		ZNF572	ZNF572::chr8:125987847/+:-000102290|ZNF572::chr8:125985538/+:-000099981|MTSS1::chr8:125740747/-:-000118170|SQLE::chr8:126010719/+:-000125162
chr8:28861216-28878063	16847	enhancer	INTS9	2.16	-0.91	3.4	5.24	1.9	-0.18	1.62	4.19	0.89	0.61	18.6	43.85	27.71	15.56	1.91	5.22	1.67	0.42	-4.54	-4.17	3.59	25.88	9.02	-1.33		INTS9		HMBOX1	INTS9::chr8:28747697/-:-000113519|INTS9::chr8:28717079/-:-000144137|INTS9::chr8:28747431/-:-000113785|HMBOX1::chr8:28821327/+:0000039889|HMBOX1::chr8:28749276/+:0000111940|HMBOX1::chr8:28747910/+:0000113306|HMBOX1::chr8:28748224/+:0000112992|HMBOX1::chr8:28821327/+:0000039889|HMBOX1::chr8:28749276/+:0000111940|HMBOX1::chr8:28747910/+:0000113306|HMBOX1::chr8:28748224/+:0000112992
chr8:62601673-62603561	1888	promotor	ASPH	0.29	0.2	1.66	0.27	-0.09	0.24	0.94	0.68	-0.1	0.28	1.72	3.13	1.75	1.71	0.29	0.89	0.19	-0.03	3.5	0.26	11.42	12.35	2.03	1.19	ASPH				ASPH::chr8:62627198/-:0000023637|ASPH::chr8:62602407/-:0000000000
chr7:154793417-154795892	2475	promotor	PAXIP1	-0.19	-0.57	2.5	1.68	2.16	2.82	1.91	1.77	2.04	2.73	-0.34	0.4	-0.04	0.25	0.2	0.75	0.6	-0.14	38.5	32.36	16.3	10.64	13.04	20.28	PAXIP1	HTR5A			HTR5A::chr7:154862033/+:-000066141|PAXIP1::chr7:154794681/-:0000000000
chr1:17004299-17005322	1023	enhancer	NBPF1	0.22	0.14	0.68	1.4	0.93	0.73	0.29	0.46	0.82	1.03	0.92	0.76	1.1	1.6	0.29	0.36	0.2	0.25	0.19	-0.12	-0.18	-0.11	0.06	0.19		NBPF1			NBPF1::chr1:16918550/-:-000085749|NBPF1::chr1:16918807/-:-000085492|NBPF1::chr1:16921155/-:-000083144|NBPF1::chr1:16940099/-:-000064200|NBPF1::chr1:16921503/-:-000082796|NBPF1::chr1:16935273/-:-000069026|NBPF1::chr1:16920061/-:-000084238
chrX:114292196-114294117	1921	enhancer	IL13RA2|RBMXL3	0.04	0.25	2.8	1.27	0.19	0.8	0.68	0.45	0.34	0.67	5.29	7.8	5.83	5.55	0.27	0.37	0.4	0.81	-0.39	-0.09	2.98	5.37	2.76	1.66		IL13RA2|RBMXL3			IL13RA2::chrX:114251864/-:-000040332|IL13RA2::chrX:114252206/-:-000039990|RBMXL3::chrX:114423962/+:-000129845|LRCH2::chrX:114468634/-:0000174517
chr4:177179887-177181912	2025	enhancer	SPCS3|SPATA4	1.53	1.34	1.87	1.11	0.55	0.05	0.75	0.78	0.31	0.68	2.73	4.46	2.78	1.62	0.93	1.22	0.5	0.46	-0.1	-0.14	6.27	9.76	3.66	0.99		SPCS3|SPATA4			WDR17::chr4:176986984/+:0000192903|WDR17::chr4:177032725/+:0000147162|WDR17::chr4:177017613/+:0000162274|WDR17::chr4:176986984/+:0000192903|WDR17::chr4:177032725/+:0000147162|WDR17::chr4:177017613/+:0000162274|SPATA4::chr4:177116821/-:-000063066|SPCS3::chr4:177241089/+:-000059177|ASB5::chr4:177190372/-:0000008460
chr20:5891852-5892822	970	promotor	CHGB	1.07	0.61	0.41	0.88	0.34	0.66	0.19	0.36	0.15	0.6	0.18	0.22	0.09	0.23	0.17	0.73	0.39	0.75	2.06	1.67	-0.04	-0.23	0.04	-0.29	CHGB	CRLS1|MCM8			CHGB::chr20:5891973/+:0000000000|LRRN4::chr20:6033449/-:0000140627|LRRN4::chr20:6034725/-:0000141903|TRMT6::chr20:5924676/-:0000031854|TRMT6::chr20:5924898/-:0000032076|TRMT6::chr20:5927178/-:0000034356|TRMT6::chr20:5931203/-:0000038381|C20orf196::chr20:5753507/+:0000138345|C20orf196::chr20:5745739/+:0000146113|C20orf196::chr20:5731032/+:0000160820|CRLS1::chr20:5987897/+:-000095075|CRLS1::chr20:5…
chr10:105155434-105157038	1604	promotor	USMG5|PDCD11	0.01	-0.36	1.68	1.37	1.3	1.52	1.09	0.73	1.59	2.49	0.51	0.82	1.03	1.33	0.19	0.15	0.44	0.27	38.82	38.15	11.08	6.94	9.89	13.57	USMG5|PDCD11	PCGF6|NEURL1			TAF5::chr10:105127723/+:0000027711|CALHM1::chr10:105218647/-:0000061609|CALHM3::chr10:105238996/-:0000081958|PCGF6::chr10:105110890/-:-000044544|CALHM2::chr10:105209855/-:0000052817|CALHM2::chr10:105211041/-:0000054003|CALHM2::chr10:105212161/-:0000055123|RPEL1::chr10:105005643/+:0000149791|NEURL1::chr10:105253734/+:-000096696|USMG5::chr10:105155788/-:0000000000|USMG5::chr10:105154150/-:-00000128…
chr7:102119141-102119495	354	promotor	POLR2J	-0.01	0.16	0.35	0.26	0.19	0.39	0.2	0.15	0.26	0.36	0.05	0.08	0.11	0.07	0.15	0.2	0.05	0.13	0.69	0.61	0.71	0.47	0.48	1.04	POLR2J	SPDYE6|SPDYE2|ALKBH4|SPDYE2B			ORAI2::chr7:102079390/+:0000039751|ORAI2::chr7:102076671/+:0000042470|ORAI2::chr7:102073976/+:0000045165|ORAI2::chr7:102086959/+:0000032182|ORAI2::chr7:102076648/+:0000042493|PRKRIP1::chr7:102036803/+:0000082338|LOC100289561::chr7:102004307/+:0000114834|LOC100289561::chr7:102006420/+:0000112721|LRWD1::chr7:102105389/+:0000013752|UPK3BL::chr7:102283237/-:0000163742|SPDYE6::chr7:101996888/-:-000122…
chr2:71503075-71504464	1389	enhancer	MCEE|ZNF638|PAIP2B|DYSF	-0.07	0.23	0.33	0.4	0.46	0.9	0.53	0.19	0.27	1.08	0.91	1.38	0.7	1.72	0.11	0.16	0.08	0.3	12.12	9.5	1.05	0.35	0.58	3.69		MCEE|ZNF638|PAIP2B|DYSF			MPHOSPH10::chr2:71357443/+:0000145632|MCEE::chr2:71357393/-:-000145682|ZNF638::chr2:71575556/+:-000071092|ZNF638::chr2:71575882/+:-000071418|ZNF638::chr2:71558884/+:-000054420|PAIP2B::chr2:71454232/-:-000048843|PAIP2B::chr2:71429729/-:-000073346|DYSF::chr2:71693831/+:-000189367|DYSF::chr2:71680752/+:-000176288
chr7:155082485-155103776	21291	promotor	INSIG1	5.46	2.64	8.99	17.13	6.24	5.81	8.55	6.66	7.34	7.71	1.5	2.21	1.24	3.24	1.12	2.9	0.61	2.05	70.01	51.93	28.64	9.16	10.68	27.21	INSIG1	EN2		EN2	EN2::chr7:155250823/+:-000147047|CNPY1::chr7:155301791/-:0000198015|INSIG1::chr7:155089968/+:0000000000|INSIG1::chr7:155089485/+:0000000000
chr2:24013339-24027640	14301	enhancer	UBXN2A	2.53	3.12	4.17	2.57	0.45	-0.15	3.54	3.73	1.63	1.38	9.87	17.6	6.95	4.8	2.08	4.2	1.63	0.26	-1.62	-1.75	6.64	13.93	3.56	0.21		UBXN2A			ATAD2B::chr2:24149983/-:0000122343|UBXN2A::chr2:24163375/+:-000135735|UBXN2A::chr2:24181170/+:-000153530
chr11:92787962-92788509	547	3 prime	SLC36A4|MTNR1B|FAT3	0.14	0.19	0.09	0.2	0.69	0.29	0.22	0.16	0.78	0.87	0.71	1.7	3.04	2.55	0.09	0.44	0.69	0.64	0.07	0.22	-0.03	0.01	0.31	0.17					MTNR1B::chr11:92702788/+:0000085174|SLC36A4::chr11:92917685/-:0000129176|SLC36A4::chr11:92914951/-:0000126442|SLC36A4::chr11:92930620/-:0000142111|SLC36A4::chr11:92931140/-:0000142631|SLC36A4::chr11:92918979/-:0000130470|SLC36A4::chr11:92916059/-:0000127550
chr2:47912878-47913844	966	enhancer	MSH6	0.22	0.39	0.99	0.43	0.39	0.29	0.79	0.29	0.23	0.07	2.2	2.65	2.04	1.1	0.26	0.32	0.07	0.28	-0.02	0.21	0.27	0.08	0.19	0.33		MSH6			FBXO11::chr2:48066907/-:0000153063|FBXO11::chr2:48066907/-:0000153063|MSH6::chr2:48011093/+:-000097249|MSH6::chr2:48010220/+:-000096376|MSH6::chr2:48023032/+:-000109188|MSH6::chr2:48025749/+:-000111905|MSH6::chr2:48018065/+:-000104221|MSH6::chr2:48025753/+:-000111909
chr11:27222852-27256454	33602	genebody_exon	BBOX1-AS1|BBOX1-AS1|BBOX1-AS1|BBOX1-AS1	27.66	10.7	16.77	5.73	-0.18	0.3	9.52	7.01	-0.05	1.54	9.1	5.54	0.42	0.99	5.37	5.3	0.23	0.4	7.68	5.45	41.83	30.88	2.28	3.32					CCDC34::chr11:27384794/-:0000128340|BBOX1::chr11:27062508/+:0000160344|BBOX1::chr11:27076939/+:0000145913|BBOX1::chr11:27062762/+:0000160090
chr2:40542384-40544906	2522	genebody_intron	SLC8A1	1.77	1.9	2.49	2.64	1.21	1.05	0.13	0.76	0.38	0.62	8.34	14.92	9.95	7.33	0.41	2.1	1.01	0.91	-0.67	-0.53	1.86	1.62	0.27	-0.17					SLC8A1::chr2:40739574/-:0000194668|SLC8A1::chr2:40657443/-:0000112537|SLC8A1::chr2:40739574/-:0000194668|SLC8A1::chr2:40657443/-:0000112537
chr2:236377281-236378283	1002	enhancer	AGAP1	0.53	0.63	0.53	0.33	0.42	0.74	0.12	0.73	0.44	0.69	0.81	0.92	0.9	1.22	-0.21	0.24	0	0.21	0.73	0.79	1.22	1.43	1.24	1.2		AGAP1			AGAP1::chr2:236402732/+:-000024449
chr1:110260856-110262501	1645	enhancer	CSF1|GNAT2	0.59	2.15	0.29	0.78	0.68	0.74	-0.08	-0.11	0.96	0.46	-0.15	0.43	0.54	-0.14	0.29	0.35	0.78	0.61	-0.43	-0.15	1.96	3.46	6.33	3.06		CSF1|GNAT2			GNAT2::chr1:110155704/-:-000105152|AMPD2::chr1:110166609/+:0000094247|AMPD2::chr1:110168048/+:0000092808|AMPD2::chr1:110163535/+:0000097321|AMPD2::chr1:110167924/+:0000092932|AMPD2::chr1:110163202/+:0000097654|AMPD2::chr1:110162434/+:0000098422|GSTM2::chr1:110210643/+:0000050213|GSTM3::chr1:110283132/-:0000020631|GSTM3::chr1:110283659/-:0000021158|GSTM4::chr1:110198697/+:0000062159|CSF1::chr1:110…
chr18:57434824-57456081	21257	enhancer	PMAIP1|CCBE1	10.12	7.76	10.52	5.35	1.23	0.7	5.7	1.75	2.18	2.38	9.12	9.83	6.21	3.81	2.96	5.17	2.17	1.7	-1.07	-2.24	31.3	39.6	15.76	7.16		PMAIP1|CCBE1			PMAIP1::chr18:57567191/+:-000111110|CCBE1::chr18:57364643/-:-000070181
chr6:6517840-6518741	901	enhancer	F13A1|LY86	0.57	0.11	0.25	1.02	0.17	0.12	0.1	0.2	0.05	-0.02	3.57	7.97	4.44	2.71	0.19	0.37	0.1	-0.03	-0.11	-0.01	-0.21	-0.05	-0.21	-0.09		F13A1|LY86			F13A1::chr6:6320923/-:-000196917|F13A1::chr6:6318914/-:-000198926|LY86::chr6:6588933/+:-000070192
chr9:114790710-114837652	46942	genebody_exon	SUSD1|SUSD1|SUSD1|SUSD1|SUSD1|SUSD1|SUSD1	34.78	39.68	23.19	21.92	21.05	30.83	16.04	16.31	36.53	37.43	29.98	61.58	56.74	44.49	3.06	17.16	20.93	31.43	-8.62	-5.87	28.2	64.81	114.57	71.74					UGCG::chr9:114659045/+:0000131665|SUSD1::chr9:114937576/-:0000099924
chr6:111977135-111979252	2117	enhancer	TRAF3IP2|REV3L	2.26	0.95	3.55	1.09	0.2	0.01	1.42	0.99	0.2	-0.01	3.56	3.43	1.79	1.14	1.16	1.71	0.43	0.37	-0.38	-0.38	7.13	7.71	2.03	0.66		TRAF3IP2|REV3L	FYN		TRAF3IP2::chr6:111888562/-:-000088573|TRAF3IP2::chr6:111887762/-:-000089373|TRAF3IP2::chr6:111913296/-:-000063839|TRAF3IP2::chr6:111927476/-:-000049659|TRAF3IP2::chr6:111888562/-:-000088573|TRAF3IP2::chr6:111887762/-:-000089373|TRAF3IP2::chr6:111913296/-:-000063839|TRAF3IP2::chr6:111927476/-:-000049659|REV3L::chr6:111781608/-:-000195527|REV3L::chr6:111804431/-:-000172704|REV3L::chr6:111793342/-:-…
chr3:44689571-44691130	1559	promotor	ZNF35	-0.47	-0.06	1.85	1.73	1.14	0.88	1.14	0.91	1.33	1.27	0.68	0.58	0.64	0.54	0.28	0.59	0.49	0.45	26.62	20.19	5.55	4.55	4.48	4.92	ZNF35	ZNF445|ZNF501|ZNF852|ZNF502|KIF15		ZNF445|ZNF197|ZNF501|ZNF35|ZNF852|ZNF660|ZNF502	ZNF445::chr3:44497187/-:-000192384|ZNF445::chr3:44499855/-:-000189716|ZNF445::chr3:44519161/-:-000170410|ZNF445::chr3:44497187/-:-000192384|ZNF445::chr3:44499855/-:-000189716|ZNF445::chr3:44519161/-:-000170410|ZNF502::chr3:44754134/+:-000063004|ZNF502::chr3:44756082/+:-000064952|ZNF502::chr3:44761694/+:-000070564|ZNF502::chr3:44758923/+:-000067793|ZNF197::chr3:44666510/+:0000023061|ZNF197::chr3:4…
chr10:117816197-117817174	977	genebody_exon	GFRA1	0.9	0.18	1.19	0.76	0.35	0.4	1.9	1.01	0.76	1.05	8.13	9.73	5.87	5.82	0.27	0.53	0.57	0.52	-0.08	-0.12	0.48	0.74	-0.04	0.04
chr10:36669181-36684325	15144	other		4.92	1.99	12.83	4.03	0.76	0.16	3.49	2.8	1.07	0.64	11.21	11.34	2.95	4.18	3.21	3.44	1.14	0.28	-1.94	-1.46	11.76	8.53	-0.61	-0.37
chr4:103541382-103542654	1272	3 prime	MANBA|NFKB1|UBE2D3	1.57	1.24	2.04	0.79	0.12	0.62	1	0.39	0.77	1.18	0.93	1.27	0.89	0.76	0.18	0.51	0.54	0.5	1.41	1.6	9	5.26	2.28	3.78				NFKB1	NFKB1::chr4:103446668/+:0000094714|NFKB1::chr4:103422485/+:0000118897|UBE2D3::chr4:103731011/-:0000188357|MANBA::chr4:103682150/-:0000139496
chr21:36552552-36553579	1027	enhancer	RUNX1	0.86	0.64	0.16	0.52	0.41	0.33	0.13	0.24	0.25	0.2	1.2	3.14	2.04	0.8	0.53	0.28	0.49	0.33	-0.27	-0.13	-0.06	1.17	0.52	0.18		RUNX1		RUNX1	RUNX1::chr21:36421594/-:-000130958|RUNX1::chr21:36421254/-:-000131298
chr8:81785403-81794979	9576	promotor	ZNF704	2.41	1.93	3.2	2.25	1.26	0.18	3.64	2.05	1.18	0.75	8.26	9.59	3.68	2.58	1.43	1.75	0.64	0.73	12.22	9.02	2.21	3.57	0.93	0.81	ZNF704	ZNF704			PAG1::chr8:81905541/-:0000110562|PAG1::chr8:81982404/-:0000187425|PAG1::chr8:81942323/-:0000147344|ZNF704::chr8:81733849/-:-000051554|ZNF704::chr8:81787015/-:0000000000
chr5:73023835-73025738	1903	enhancer	ARHGEF28|ANKRA2	0.44	1.2	2.22	0.19	-0.18	-0.27	0.71	0.77	0.43	0.37	0.39	-0.15	-0.36	-0.3	0.42	-0.09	-0.19	0.19	-0.3	-0.87	8.67	4.29	0.33	0.68		ARHGEF28|ANKRA2			ARHGEF28::chr5:72980665/+:0000043170|ARHGEF28::chr5:73109342/+:-000083604|ARHGEF28::chr5:72921982/+:0000101853|ARHGEF28::chr5:72980665/+:0000043170|ARHGEF28::chr5:73109342/+:-000083604|ARHGEF28::chr5:72921982/+:0000101853|ANKRA2::chr5:72861510/-:-000162325|ANKRA2::chr5:72858809/-:-000165026|UTP15::chr5:72865321/+:0000158514|UTP15::chr5:72866410/+:0000157425|UTP15::chr5:72861565/+:0000162270|UTP15…
chr10:91151357-91153390	2033	promotor	IFIT1	0.84	0.47	1.67	0.82	0.5	0.53	0.85	0.87	0.48	0.29	5.01	7.01	4.91	3.01	0.65	0.52	0.09	0.81	15.04	9.89	6.42	5	2.87	2.88	IFIT1	LIPA|IFIT5|IFIT1|CH25H			LIPA::chr10:91011795/-:-000139562|LIPA::chr10:91011664/-:-000139693|LIPA::chr10:91007405/-:-000143952|LIPA::chr10:90988154/-:-000163203|LIPA::chr10:91011795/-:-000139562|LIPA::chr10:91011664/-:-000139693|LIPA::chr10:91007405/-:-000143952|LIPA::chr10:90988154/-:-000163203|IFIT1B::chr10:91137812/+:0000013545|SLC16A12::chr10:91294396/-:0000141006|SLC16A12::chr10:91295312/-:0000141922|SLC16A12::chr10…
chr10:79587956-79588836	880	enhancer	KCNMA1	0.83	0.41	0.13	0.64	-0.09	-0.02	0.05	0.03	0.04	-0.16	2.23	4	2.67	1.78	-0.19	0.04	-0.1	-0.18	-0.13	-0.29	0.02	-0.05	-0.34	-0.14		KCNMA1			DLG5::chr10:79686347/-:0000097511|KCNMA1::chr10:79397576/-:-000190380
chr6:141772010-141790040	18030	other		3.79	3.16	10.44	5.35	2.06	3.42	2.52	3.42	1.65	2.59	2.27	5.26	2.52	1.57	1.8	4.73	2.42	4.04	0.21	0.19	25.64	36.75	16.2	11.21
chr6:14888299-14889723	1424	other		0.52	0.07	1.96	0.17	0.21	-0.12	1.27	0.25	0.35	0.1	3.67	0.85	-0.1	0.33	0.93	-0.09	0.4	0.3	0.28	-0.19	1.33	-0.11	-0.04	0.45
chr11:102872705-102873520	815	enhancer	DYNC2H1|MMP3|MMP12|MMP13	-0.22	-0.05	0.77	0.21	0.02	0.11	0.28	0.18	0.11	0	2.13	1.38	0.72	0.94	0.37	0.02	0.14	0.08	0.13	0.02	0.5	-0.02	0.04	0.17		DYNC2H1|MMP3|MMP12|MMP13			MMP3::chr11:102714341/-:-000158364|DYNC2H1::chr11:102980159/+:-000106639|DCUN1D5::chr11:102962943/-:0000089423|MMP12::chr11:102745763/-:-000126942|MMP13::chr11:102826462/-:-000046243
chr10:5507675-5517299	9624	enhancer	CALML3|TUBAL3	2.35	0.86	1.18	3.89	1.42	0.41	1.32	2.63	1.12	0.73	1.06	4.19	2.33	0.75	1.6	2.67	1.33	0.19	0.87	-0.19	4.08	11.17	2.15	-0.23		CALML3|TUBAL3			ASB13::chr10:5708557/-:0000191258|CALML3::chr10:5566851/+:-000049552|CALML5::chr10:5541532/-:0000024233|TUBAL3::chr10:5446792/-:-000060883|UCN3::chr10:5415677/+:0000091998|UCN3::chr10:5406975/+:0000100700|NET1::chr10:5454513/+:0000053162|NET1::chr10:5488513/+:0000019162
chr10:126733856-126734929	1073	enhancer	CTBP2	1.57	1.1	0.62	1.21	0.75	0.35	1.18	1.01	0.62	0.73	2.81	4.59	3.63	3.08	0.16	0.63	0.35	0.28	0.74	0.48	2.35	4.62	4.26	2.46		CTBP2			CTBP2::chr10:126849623/-:0000114694|CTBP2::chr10:126727723/-:-000006133|CTBP2::chr10:126849102/-:0000114173|CTBP2::chr10:126847383/-:0000112454|CTBP2::chr10:126799661/-:0000064732|CTBP2::chr10:126822180/-:0000087251|CTBP2::chr10:126716452/-:-000017404|CTBP2::chr10:126849623/-:0000114694|CTBP2::chr10:126727723/-:-000006133|CTBP2::chr10:126849102/-:0000114173|CTBP2::chr10:126847383/-:0000112454|CTB…
chr1:153669128-153681636	12508	enhancer	INTS3|SLC27A3|S100A16|ILF2|S100A5|S100A4|S100A13|S100A6|S100A14|S100A3|S100A2	5.23	3.96	4.76	2.86	0.62	1.27	1.93	2.68	1.12	0.83	6.29	9.66	3.95	2.9	0.41	2.06	1.19	1.12	-2.93	-2.13	11.36	20.84	7.91	5.43		INTS3|SLC27A3|S100A16|ILF2|S100A5|S100A4|S100A13|S100A6|S100A14|S100A3|S100A2	NPR1	GATAD2B	INTS3::chr1:153700566/+:-000018930|NPR1::chr1:153651163/+:0000017965|S100A6::chr1:153508716/-:-000160412|S100A6::chr1:153507835/-:-000161293|SNAPIN::chr1:153631129/+:0000037999|S100A5::chr1:153512680/-:-000156448|S100A5::chr1:153513946/-:-000155182|S100A5::chr1:153514240/-:-000154888|CHTOP::chr1:153609047/+:0000060081|CHTOP::chr1:153606457/+:0000062671|S100A2::chr1:153536362/-:-000132766|S100A2::…
chr7:134965981-134966898	917	enhancer	WDR91|C7orf49	0.16	0.26	0.63	0.75	0.45	0.21	0.62	0.6	0.2	0.62	0.38	0.9	0.81	0.46	0.07	0.49	0.2	0.32	0.49	0.14	0.21	0.73	0.21	0.07		WDR91|C7orf49			TMEM140::chr7:134849169/+:0000116812|TMEM140::chr7:134832765/+:0000133216|C7orf49::chr7:134855577/-:-000110404|C7orf49::chr7:134854225/-:-000111756|C7orf49::chr7:134852558/-:-000113423|C7orf49::chr7:134853811/-:-000112170|C7orf49::chr7:134855275/-:-000110706|WDR91::chr7:134896315/-:-000069666|CNOT4::chr7:135123170/-:0000156272
chr8:20079330-20089718	10388	enhancer	SLC18A1	3.57	1.45	2.29	2.07	0.77	1.06	2.55	0.9	1.1	2.33	6.88	6.5	5.2	2.66	2.08	1.41	1.48	0.91	0.07	-0.42	3.07	2.89	0.47	0.41		SLC18A1			ATP6V1B2::chr8:20054703/+:0000024627|SLC18A1::chr8:20038597/-:-000040733|SLC18A1::chr8:20040716/-:-000038614|SLC18A1::chr8:20039462/-:-000039868|LZTS1::chr8:20112802/-:0000023084
chr13:81192634-81205763	13129	other		-1.99	-1.85	1.29	0.52	-0.4	1.26	0.07	-0.3	0.1	0.23	6.67	9.88	9.15	6.96	-0.08	0.04	0.22	0.63	-3.37	-3.51	-1.46	-1.82	-0.59	2.17
chr3:62094863-62096052	1189	genebody_intron	PTPRG	2.61	1.22	1.34	0.5	0.4	-0.02	0.78	0.23	0.48	0.3	2.51	2.21	1.6	1.26	0.26	0.51	0.27	0.06	-0.11	0.09	1.17	0.7	0.35	0
chr15:36321643-36322490	847	other		0.17	0.23	0.14	0.73	0.11	0.09	0.47	0.48	0.52	0.26	0.62	1.33	0.31	0.42	0.18	0.49	0.07	0.13	0.31	0	0.06	0.11	-0.04	0.08
chr20:49535942-49549469	13527	promotor	ADNP	10.73	7.08	8.82	6.38	4.75	8.44	4.76	2.94	4.05	5.01	3.91	10.08	9.67	4.36	1.46	1.34	-0.2	0.55	40.78	32.52	27.77	23.39	25.55	26.2	ADNP	MOCS3|ADNP		ADNP	MOCS3::chr20:49575350/+:-000025881|KCNG1::chr20:49626900/-:0000077431|KCNG1::chr20:49639674/-:0000090205|BCAS4::chr20:49411430/+:0000124512|ADNP::chr20:49547526/-:0000000000|ADNP::chr20:49520537/-:-000015405|ADNP::chr20:49521385/-:-000014557|ADNP::chr20:49545361/-:0000000000|ADNP::chr20:49526327/-:-000009615|PARD6B::chr20:49348080/+:0000187862
chr1:32478477-32480680	2203	promotor	KHDRBS1	-0.12	-1	2.1	1.66	0.98	2.17	1.8	0.81	1.84	3.12	-0.34	-0.28	-0.69	-0.1	0	0.55	-0.14	-0.08	40.34	38.49	17.07	11.99	11.23	21.95	KHDRBS1	IQCC|TMEM39B|TXLNA|CCDC28B|KPNA6|PTP4A2|SPOCD1			IQCC::chr1:32671235/+:-000190555|TMEM39B::chr1:32538502/+:-000057822|KHDRBS1::chr1:32479294/+:0000000000|TXLNA::chr1:32645914/+:-000165234|TXLNA::chr1:32645344/+:-000164664|CCDC28B::chr1:32667513/+:-000186833|CCDC28B::chr1:32665986/+:-000185306|KPNA6::chr1:32573643/+:-000092963|PTP4A2::chr1:32385258/-:-000093219|PTP4A2::chr1:32403987/-:-000074490|PTP4A2::chr1:32385258/-:-000093219|PTP4A2::chr1:32…
chr9:15722654-15738696	16042	genebody_exon	CCDC171|CCDC171|CCDC171|CCDC171	2.93	3.05	15.19	4.04	1.41	3.67	4.89	4.11	3.38	2.81	8.94	11.83	8.56	7.81	2.39	4.25	3.57	3.25	-2.55	-2.41	30.84	44.63	22.93	13.75					CCDC171::chr9:15563975/+:0000158679|CCDC171::chr9:15553096/+:0000169558
chr3:197463123-197478440	15317	promotor	KIAA0226|FYTTD1	-0.51	0.91	3.94	2.81	2.88	2.9	3.57	2.18	4.03	4.21	1.77	4.85	4.26	3.31	1.73	1.28	1.41	2.48	73.1	60.7	15.36	11.06	12.91	14.16	KIAA0226|FYTTD1	RPL35A|KIAA0226|LRCH3|BDH1			RPL35A::chr3:197677806/+:-000199366|RPL35A::chr3:197677051/+:-000198611|KIAA0226::chr3:197476569/-:0000000000|KIAA0226::chr3:197445000/-:-000018123|KIAA0226::chr3:197463796/-:0000000000|IQCG::chr3:197676795/-:0000198355|IQCG::chr3:197672556/-:0000194116|LRCH3::chr3:197518096/+:-000039656|FYTTD1::chr3:197482540/+:-000004100|FYTTD1::chr3:197476423/+:0000000000|FYTTD1::chr3:197476623/+:0000000000|BD…
chr2:188831803-188860179	28376	other		5.45	-0.35	23.09	5.18	-0.05	-0.51	5.19	2.83	0.35	-0.15	8.04	7.35	0.41	0.49	5.87	4.76	1.19	0.11	-3.75	-4.32	21.98	4.9	-3.49	-3.64
chr9:89019764-89023363	3599	enhancer	ISCA1|C9orf153|ZCCHC6	4.83	4.96	9.13	4.85	3.04	1.8	4.51	3.86	4.07	3.18	9.67	14.83	11.45	7.66	2.74	4.26	3.11	1.99	4.95	1.78	35.42	45.68	15.68	5.9		ISCA1|C9orf153|ZCCHC6			ISCA1::chr9:88897489/-:-000122275|C9orf153::chr9:88852074/-:-000167690|C9orf153::chr9:88874571/-:-000145193|C9orf153::chr9:88870947/-:-000148817|C9orf153::chr9:88844543/-:-000175221|ZCCHC6::chr9:88968144/-:-000051620|ZCCHC6::chr9:88969401/-:-000050363
chr3:84488509-84489206	697	other		-0.03	0.08	0.64	0.62	0.08	0.13	0.11	0.36	0.15	0.45	5.56	4.02	2.04	2.03	0.26	0.35	0.05	0.23	-0.1	-0.1	-0.11	0.05	0	0
chr5:172443191-172444403	1212	enhancer	CREBRF|BNIP1	1.53	0.96	0.55	0.99	0.16	0.34	0.73	0.16	0.29	0.09	1.19	1.49	0.78	0.76	0.33	0.41	0.44	0.2	1.14	0.31	3.83	5.5	3.35	1.28		CREBRF|BNIP1			CREBRF::chr5:172507591/+:-000063188|CREBRF::chr5:172483354/+:-000038951|CREBRF::chr5:172507587/+:-000063184|CREBRF::chr5:172507591/+:-000063188|CREBRF::chr5:172483354/+:-000038951|CREBRF::chr5:172507587/+:-000063184|ATP6V0E1::chr5:172410762/+:0000032429|RPL26L1::chr5:172386438/+:0000056753|RPL26L1::chr5:172386867/+:0000056324|BNIP1::chr5:172571444/+:-000127041|ERGIC1::chr5:172261222/+:0000181969
chr20:12394962-12396186	1224	other		1.5	0.94	0.83	0.25	0.25	0.37	0.17	-0.04	0.33	0.28	-0.05	0.51	-0.06	0.65	0.38	0.71	0.45	0.33	0.1	-0.15	2.03	1.94	1.86	1.38
chr10:106028167-106029516	1349	promotor	GSTO2	-0.13	-0.09	1.46	0.47	0.57	0.58	0.65	0.44	0.77	1.42	1.05	0.8	0.8	1.35	-0.04	0.25	0.36	0.26	10.94	9.3	2.33	1.84	1.53	3.04	GSTO2	GSTO2|CFAP58|CFAP43|COL17A1			GSTO2::chr10:106028630/+:0000000000|GSTO2::chr10:106034886/+:-000005370|GSTO2::chr10:106034442/+:-000004926|GSTO1::chr10:106014920/+:0000013247|GSTO1::chr10:106013951/+:0000014216|GSTO1::chr10:106014467/+:0000013700|ITPRIP::chr10:106088749/-:0000059233|ITPRIP::chr10:106093662/-:0000064146|ITPRIP::chr10:106093255/-:0000063739|ITPRIP::chr10:106075821/-:0000046305|ITPRIP::chr10:106098250/-:000006873…
chr16:72908962-72913164	4202	genebody_intron	ZFHX3	10.1	7.15	5.59	6.25	2.69	4.47	4.7	4.09	7.01	5.98	9.33	22.19	14.62	10.06	1.54	4.55	2.46	3.36	3.03	1.87	17.34	29.8	24.75	21.12				ZFHX3	ZFHX3::chr16:72994092/-:0000080928|ZFHX3::chr16:73092533/-:0000179369|ZFHX3::chr16:73082273/-:0000169109|ZFHX3::chr16:72984863/-:0000071699|ZFHX3::chr16:72994092/-:0000080928|ZFHX3::chr16:73092533/-:0000179369|ZFHX3::chr16:73082273/-:0000169109|ZFHX3::chr16:72984863/-:0000071699
chr7:45962444-45964676	2232	promotor	IGFBP3	2.88	1.07	1.69	0.4	0.14	0.02	1.63	0.82	0.3	0.66	0.92	0.8	0.32	0.14	0.27	0.11	0.12	0.04	0.44	0.32	0.59	0.07	-0.11	-0.34	IGFBP3				IGFBP3::chr7:45960870/-:-000001574|IGFBP1::chr7:45927958/+:0000034486
chr9:104227345-104228115	770	enhancer	BAAT|MRPL50|ALDOB|RNF20	0.21	0.14	0.32	0.5	0.21	0.06	0.29	0.38	0.18	0.18	2.16	2.5	2.25	1.7	0.35	0.5	0.21	0.01	0.13	-0.05	0.04	0.18	0.08	-0.01		BAAT|MRPL50|ALDOB|RNF20		ZNF189	PPP3R2::chr9:104357282/-:0000129167|ZNF189::chr9:104161135/+:0000066210|ZNF189::chr9:104162207/+:0000065138|ZNF189::chr9:104161676/+:0000065669|TMEM246::chr9:104239450/-:0000011335|TMEM246::chr9:104249502/-:0000021387|TMEM246::chr9:104249051/-:0000020936|TMEM246::chr9:104243006/-:0000014891|BAAT::chr9:104133744/-:-000093601|BAAT::chr9:104145800/-:-000081545|BAAT::chr9:104147286/-:-000080059|MRPL5…
chr15:50526836-50527707	871	enhancer	USP8|ATP8B4	0.56	0.17	0.25	0.76	0.22	0.05	0.44	0.06	0.3	-0.12	1.72	5.46	3.84	1.97	0.28	0.22	0.15	0.09	-0.16	-0.18	0.26	1.23	0.69	0.13		USP8|ATP8B4			USP8::chr15:50716573/+:-000188866|SLC27A2::chr15:50474392/+:0000052444|GABPB1::chr15:50647604/-:0000119897|GABPB1::chr15:50638591/-:0000110884|HDC::chr15:50558161/-:0000030454|ATP8B4::chr15:50399204/-:-000127632|ATP8B4::chr15:50411418/-:-000115418|ATP8B4::chr15:50399204/-:-000127632|ATP8B4::chr15:50411418/-:-000115418
chr4:87372531-87373241	710	promotor	MAPK10	0.37	0.11	0.08	0.49	0.12	-0.01	-0.03	0.16	0.14	0.09	0.36	1.11	0.66	0.36	0.06	0.02	0.06	0.08	-0.08	-0.08	-0.09	0.02	-0.25	-0.07	MAPK10	PTPN13|MAPK10	MAPK10		PTPN13::chr4:87556404/+:-000183163|PTPN13::chr4:87515467/+:-000142226|MAPK10::chr4:87275796/-:-000096735|MAPK10::chr4:87374282/-:0000001041|MAPK10::chr4:87281374/-:-000091157|MAPK10::chr4:87275796/-:-000096735|MAPK10::chr4:87374282/-:0000001041|MAPK10::chr4:87281374/-:-000091157|MAPK10::chr4:87275796/-:-000096735|MAPK10::chr4:87374282/-:0000001041|MAPK10::chr4:87281374/-:-000091157
chr19:55918384-55920454	2070	promotor	UBE2S	-0.63	-0.47	1.75	1.23	1.06	2.36	1.18	1.32	0.95	3.6	-0.44	-0.15	-0.25	-0.41	0.06	0.26	0.3	0.57	19.7	18.7	15.51	7.61	9.79	23.33	UBE2S	ZNF524|ZNF628|IL11|FAM71E2|SSC5D|TMEM150B|HSPBP1|PPP6R1|COX6B2|NAT14|TMEM86B|PTPRH	BRSK1|SBK2	ZNF524|ZNF628|FIZ1|ZNF579	ZNF524::chr19:56111705/+:-000191251|ZNF524::chr19:56113440/+:-000192986|TMEM86B::chr19:55740631/-:-000177753|ZNF628::chr19:55987698/+:-000067244|ZNF628::chr19:55991200/+:-000070746|ISOC2::chr19:55967855/-:0000047401|ISOC2::chr19:55973048/-:0000052594|BRSK1::chr19:55795533/+:0000122851|RPL28::chr19:55897717/+:0000020667|RPL28::chr19:55897299/+:0000021085|IL11::chr19:55879936/-:-000038448|IL11::chr…
chr6:92841994-92842713	719	other		0.13	0.15	0.48	0.56	0.27	0.01	0.68	0.48	0.36	0.37	3.05	4.2	3.1	2.68	0.09	0.31	-0.06	0.23	0.01	-0.06	-0.13	-0.14	-0.23	-0.01
chr11:95744908-95745982	1074	enhancer	MTMR2	1.07	0.48	0.47	1.17	0.41	0.33	0.19	0.4	1.05	0.26	0.64	0.76	0.25	0.14	0.63	0.24	0.36	0.02	0.28	0.34	-0.01	0.6	0.65	0.32		MTMR2			MTMR2::chr11:95620847/-:-000124061|MTMR2::chr11:95598839/-:-000146069|MTMR2::chr11:95657370/-:-000087538|MTMR2::chr11:95621424/-:-000123484|MTMR2::chr11:95615659/-:-000129249|MTMR2::chr11:95647475/-:-000097433|MTMR2::chr11:95620847/-:-000124061|MTMR2::chr11:95598839/-:-000146069|MTMR2::chr11:95657370/-:-000087538|MTMR2::chr11:95621424/-:-000123484|MTMR2::chr11:95615659/-:-000129249|MTMR2::chr11:9…
chr10:70659686-70661939	2253	promotor	DDX50	-0.19	0.24	3.99	2.72	2.05	3.15	1.4	1.66	2.23	3.32	0.12	0.36	0.7	0.93	0.48	0.73	0.41	0.72	28.43	27.86	16.34	12.95	14.1	17.88	DDX50	DDX21|KIAA1279|SRGN			DDX21::chr10:70715878/+:-000053939|DDX21::chr10:70719561/+:-000057622|DDX21::chr10:70716195/+:-000054256|DDX50::chr10:70661033/+:0000000000|KIAA1279::chr10:70748476/+:-000086537|STOX1::chr10:70587293/+:0000072393|SRGN::chr10:70847827/+:-000185888|CCAR1::chr10:70480900/+:0000178786|CCAR1::chr10:70482211/+:0000177475
chr20:7859867-7861250	1383	3 prime	TMX4|HAO1	-0.14	0.3	-0.46	-0.36	-0.22	0.87	-0.46	-0.35	-0.23	-0.24	0.13	-0.05	0.84	1.82	-0.38	-0.23	0.05	0.67	-0.36	-0.33	-0.6	-0.65	0	0.36					HAO1::chr20:7921092/-:0000059842|TMX4::chr20:8000475/-:0000139225
chr1:64385684-64387255	1571	genebody_intron	ROR1	1.34	0.84	1.72	1.35	1.59	2.42	0.93	0.04	2.1	2.83	1.35	1.9	1.46	1.22	0.56	0.29	0.75	2.23	-0.33	-0.17	1.34	0.47	3.96	3.07			ROR1		ROR1::chr1:64239689/+:0000145995
chr2:160494269-160495257	988	enhancer	BAZ2B|MARCH7	0.84	0.55	0.41	1.05	0.43	0.04	0.35	0.3	0.55	0.07	1.29	3.04	2.4	1.09	0.15	0.5	0.35	0.19	-0.01	-0.21	0.13	0.44	0.12	0.11		BAZ2B|MARCH7		BAZ2B	BAZ2B::chr2:160412375/-:-000081894|BAZ2B::chr2:160473111/-:-000021158|BAZ2B::chr2:160335231/-:-000159038|BAZ2B::chr2:160412375/-:-000081894|BAZ2B::chr2:160473111/-:-000021158|BAZ2B::chr2:160335231/-:-000159038|CD302::chr2:160654765/-:0000159508|MARCH7::chr2:160572191/+:-000076934|MARCH7::chr2:160568967/+:-000073710|MARCH7::chr2:160590401/+:-000095144|MARCH7::chr2:160585519/+:-000090262|MARCH7::ch…
chr8:87715424-87716169	745	enhancer	CNBD1|RMDN1	0.06	-0.18	0.43	0.48	0.18	0.28	0.11	-0.02	-0.03	0.2	0.13	0.25	0.15	0.12	0.22	0.26	0.2	-0.2	-0.31	-0.13	0.18	0.49	-0.17	0		CNBD1|RMDN1			CPNE3::chr8:87540763/+:0000174661|CPNE3::chr8:87526655/+:0000188769|CPNE3::chr8:87527689/+:0000187735|CNGB3::chr8:87755902/-:0000039733|RMDN1::chr8:87521008/-:-000194416|CNBD1::chr8:87878675/+:-000162506
chr6:45663866-45683519	19653	3 prime	RUNX2|CLIC5	17.94	20.44	34.44	12.84	6.99	44.33	23.12	12.25	16.39	27.32	13.17	29.87	24.64	22.23	3.14	14.77	12.83	21.58	-5.72	-4.2	69.96	106.85	84.72	94.14
chr17:28705215-28706712	1497	promotor	CPD	-0.2	-0.02	1.36	0.74	1.04	1.15	1.33	0.82	1.22	0.81	-0.19	-0.17	-0.01	0.59	0.11	0.53	0.13	0.19	18.19	16.64	5.17	2.38	6.43	6.84	CPD	SLC6A4|TMIGD1|BLMH|TBC1D29|GOSR1			SLC6A4::chr17:28562985/-:-000142230|SLC6A4::chr17:28549932/-:-000155283|SLC6A4::chr17:28549098/-:-000156117|TMIGD1::chr17:28659175/-:-000046040|TMIGD1::chr17:28661064/-:-000044151|CPD::chr17:28705941/+:0000000000|CPD::chr17:28707495/+:-000000783|BLMH::chr17:28619183/-:-000086032|TBC1D29::chr17:28886583/+:-000179871|GOSR1::chr17:28808160/+:-000101448|GOSR1::chr17:28804425/+:-000097713|GOSR1::chr17…
chr14:81866780-81868391	1611	promotor	STON2	3.38	3.4	1.69	1.48	1.6	0.74	1.57	0.66	1.38	1.31	11.32	14.07	13.08	10.04	0.72	1.53	0.92	1.16	3.17	1.12	3.38	2.76	1.11	0.9	STON2	GTF2A1			SEL1L::chr14:82000204/-:0000131813|GTF2A1::chr14:81682857/-:-000183923|GTF2A1::chr14:81687574/-:-000179206|GTF2A1::chr14:81676279/-:-000190501|GTF2A1::chr14:81687295/-:-000179485|GTF2A1::chr14:81670447/-:-000196333|STON2::chr14:81893747/-:0000025356|STON2::chr14:81864923/-:-000001857|STON2::chr14:81893555/-:0000025164
chr10:54615493-54644807	29314	enhancer	MBL2	9.54	5.09	20.76	3.96	1.43	4.99	7.49	2.06	1.69	2.66	10.05	11.4	3.84	3.86	1.82	2.47	0.88	3.43	-1.73	-3.26	55.08	26.11	8.58	11.8		MBL2			MBL2::chr10:54531459/-:-000084034
chr9:34124850-34164310	39460	promotor	DCAF12	24.34	20.07	7.3	8.95	4.77	2.8	4.54	8.45	5.52	4.71	11.03	28.72	17.36	9.59	2.98	6.33	3.18	3.06	32.9	26.42	26.67	47.91	27.9	17.81	DCAF12	UBAP2|UBAP1|NUDT2			DCAF12::chr9:34126770/-:0000000000|NUDT2::chr9:34329503/+:-000165193|NUDT2::chr9:34336297/+:-000171987|NUDT2::chr9:34339021/+:-000174711|NUDT2::chr9:34336226/+:-000171916|NUDT2::chr9:34338710/+:-000174400|UBAP2::chr9:33927989/-:-000196861|UBAP2::chr9:33998861/-:-000125989|UBAP2::chr9:34017186/-:-000107664|UBAP2::chr9:33996330/-:-000128520|UBAP2::chr9:33932625/-:-000192225|UBAP2::chr9:34048946/-:-…
chr14:75347956-75355475	7519	promotor	DLST	6.77	6.47	2.1	2.56	1.38	2.54	2.64	1.58	3.15	3.34	7.41	5.06	6.48	4.72	0.57	1.16	0.94	1.61	27.18	23.49	9.39	4.3	5.69	9.96	DLST	EIF2B2|ZC2HC1C|AREL1	RPS6KL1		PGF::chr14:75422466/-:0000066991|ACYP1::chr14:75536185/-:0000180710|ACYP1::chr14:75530263/-:0000174788|ACYP1::chr14:75530751/-:0000175276|EIF2B2::chr14:75469611/+:-000114136|DLST::chr14:75348593/+:0000000000|FCF1::chr14:75179849/+:0000168107|MLH3::chr14:75518234/-:0000162759|MLH3::chr14:75516420/-:0000160945|ZC2HC1C::chr14:75536279/+:-000180804|ZC2HC1C::chr14:75537257/+:-000181782|YLPM1::chr14:75…
chr20:50647115-50649194	2079	3 prime	ZFP64	2.81	1.58	3.33	1.45	0.2	2.48	1.6	0.98	0.59	0.98	3.96	4.62	3.35	4.42	0.51	1.23	0.52	1.77	0.7	0.32	9	12.74	9.58	8.29				ZFP64	ZFP64::chr20:50808523/-:0000159329
chr10:135106548-135107505	957	enhancer	PRAP1|PAOX|ADAM8|MTG1|ZNF511	3.58	2.72	-0.26	0.02	0.86	0.56	0.07	-0.06	0.17	0.33	-0.36	-0.4	0.05	-0.02	-0.23	-0.06	0.28	0.07	0	1.21	0.07	-0.21	3.67	2.56		PRAP1|PAOX|ADAM8|MTG1|ZNF511		VENTX	UTF1::chr10:135043777/+:0000062771|CALY::chr10:135150474/-:0000042969|CALY::chr10:135142512/-:0000035007|ZNF511::chr10:135122392/+:-000014887|FUOM::chr10:135170965/-:0000063460|FUOM::chr10:135171528/-:0000064023|PAOX::chr10:135192740/+:-000085235|SPRN::chr10:135238120/-:0000130615|SPRN::chr10:135237200/-:0000129695|ADAM8::chr10:135090406/-:-000016142|MTG1::chr10:135207620/+:-000100115|ADGRA1::chr…
chr14:70451917-70466803	14886	enhancer	SLC10A1	7.98	10.54	1.77	5.3	3.74	3.1	1.42	2.48	2.87	4.7	10.42	25.75	23.73	18.78	0.17	3.39	3.25	4.9	-1.95	-0.69	4.67	14.45	29.02	16.35		SLC10A1			SLC10A1::chr14:70264005/-:-000187912|SLC8A3::chr14:70546933/-:0000080130|SLC8A3::chr14:70655786/-:0000188983|SLC8A3::chr14:70635200/-:0000168397|SLC8A3::chr14:70518830/-:0000052027|SLC8A3::chr14:70527655/-:0000060852|SLC8A3::chr14:70546933/-:0000080130|SLC8A3::chr14:70655786/-:0000188983|SLC8A3::chr14:70635200/-:0000168397|SLC8A3::chr14:70518830/-:0000052027|SLC8A3::chr14:70527655/-:0000060852|SM…
chr1:36273069-36275107	2038	promotor	AGO4	-0.32	-0.01	2.1	1.24	0.38	0.15	0.62	0.95	0.92	0.85	-0.39	-0.55	0.22	-0.26	0.2	0.46	-0.14	0.04	22.98	17.55	11.51	10.78	9.45	7.31	AGO4	CLSPN|C1orf216|AGO1|PSMB2|AGO3			CLSPN::chr1:36235550/-:-000037519|C1orf216::chr1:36181926/-:-000091143|C1orf216::chr1:36184789/-:-000088280|AGO4::chr1:36273827/+:0000000000|AGO1::chr1:36348809/+:-000073702|PSMB2::chr1:36107444/-:-000165625|PSMB2::chr1:36075008/-:-000198061|PSMB2::chr1:36096944/-:-000176125|PSMB2::chr1:36097137/-:-000175932|PSMB2::chr1:36107151/-:-000165918|PSMB2::chr1:36107444/-:-000165625|PSMB2::chr1:36075008/…
chr6:38277368-38278501	1133	genebody_intron	BTBD9	0.69	-0.07	1.18	-0.21	-0.06	-0.15	0.25	-0.03	-0.03	-0.1	0.13	-0.14	-0.26	-0.21	0.37	0.17	0.13	-0.17	0.8	0.11	2.39	-0.15	-0.21	-0.09
chr13:104535166-104536188	1022	other		-0.16	0.37	0.73	1.36	0.88	0.47	0.75	0.74	0.79	0.61	2.32	2.88	1.9	1.59	-0.09	0.53	0.74	0.6	0.47	-0.21	0.26	0.5	0.52	-0.22
chr20:4172748-4174302	1554	enhancer	RNF24	3.25	2.01	1.23	1.52	0.93	1.5	0.55	1.11	1.11	1.16	7.44	13.86	13.48	12.2	0.39	0.68	0.98	0.96	1.27	1.07	2.62	3.82	6.27	3.46		RNF24			RNF24::chr20:3996053/-:-000176695|RNF24::chr20:3996215/-:-000176533|ADRA1D::chr20:4229658/-:0000055356|SMOX::chr20:4129425/+:0000043323|SMOX::chr20:4155676/+:0000017072
chr2:201980247-201996073	15826	promotor	CFLAR	12.95	13.83	21.16	15.18	14.52	22.64	16.3	15.7	22.88	25.08	18.44	32	29.65	24.47	1.41	6.94	5.1	7.09	47.76	31.32	93.08	133.94	141.14	89.64	CFLAR	ORC2|CASP8|CASP10|CFLAR|FAM126B			NDUFB3::chr2:201943603/+:0000036644|NDUFB3::chr2:201936461/+:0000043786|NDUFB3::chr2:201937061/+:0000043186|ORC2::chr2:201824162/-:-000156085|ORC2::chr2:201828423/-:-000151824|ORC2::chr2:201822855/-:-000157392|CASP8::chr2:202122753/+:-000126680|CASP8::chr2:202131183/+:-000135110|CASP8::chr2:202125222/+:-000129149|CASP8::chr2:202098165/+:-000102092|CASP8::chr2:202098738/+:-000102665|CASP8::chr2:20…
chr11:2880874-2882581	1707	enhancer	SLC22A18	2.88	1.73	1.12	1.26	-0.01	-0.11	1.13	1.3	0.43	0.53	0.66	1.1	0.32	0.11	0.75	1.04	0.56	0.24	0.83	0.28	2.78	6.12	2.05	0.01		SLC22A18			SLC22A18::chr11:2923511/+:-000040930|SLC22A18::chr11:2920950/+:-000038369|SLC22A18::chr11:2924443/+:-000041862|CDKN1C::chr11:2906695/-:0000024114|CDKN1C::chr11:2906994/-:0000024413|CARS::chr11:3078680/-:0000196099|NAP1L4::chr11:3013606/-:0000131025|NAP1L4::chr11:3000466/-:0000117885|SLC22A18AS::chr11:2925174/-:0000042593|SLC22A18AS::chr11:2921019/-:0000038438|SLC22A18AS::chr11:2923938/-:000004135…
chr8:28514576-28527706	13130	enhancer	EXTL3|FBXO16	3.1	2.36	1.65	2.51	0.99	-0.24	2.43	2.07	1.01	-0.07	11.93	13.92	7.65	4.37	1.79	2.37	1.29	-0.08	0.17	-0.51	1.52	1.11	-1.5	-1.2		EXTL3|FBXO16			FZD3::chr8:28357449/+:0000157127|FZD3::chr8:28360186/+:0000154390|FZD3::chr8:28351721/+:0000162855|INTS9::chr8:28717079/-:0000189373|EXTL3::chr8:28570973/+:-000043267|EXTL3::chr8:28573101/+:-000045395|EXTL3::chr8:28558989/+:-000031283|FBXO16::chr8:28347834/-:-000166742|FBXO16::chr8:28340978/-:-000173598
chr4:159212635-159258254	45619	enhancer	RXFP1|FAM198B	1.71	0.42	26.43	6.35	1.2	12.05	10.02	5.57	6.33	8.48	20.39	27.29	18.44	17.38	3.81	3.4	4.34	4.36	-14.74	-13.83	67.43	69.56	51.66	40.02		RXFP1|FAM198B			RXFP1::chr4:159442865/+:-000184611|TMEM144::chr4:159131400/+:0000081235|TMEM144::chr4:159133759/+:0000078876|TMEM144::chr4:159132604/+:0000080031|FAM198B::chr4:159093717/-:-000118918|FAM198B::chr4:159094201/-:-000118434|FAM198B::chr4:159092750/-:-000119885
chr3:8869140-8869835	695	enhancer	SSUH2|OXTR	0.48	0.22	0.63	0.6	0.42	0.16	0.16	0.29	0.63	0.45	2.27	4.08	3.68	2.24	0.22	0.4	0.37	0.44	-0.03	0.22	0.38	1	0.77	0.04		SSUH2|OXTR			RAD18::chr3:9005158/-:0000135323|SSUH2::chr3:8677066/-:-000192074|SSUH2::chr3:8677542/-:-000191598|SSUH2::chr3:8675480/-:-000193660|SSUH2::chr3:8675626/-:-000193514|SSUH2::chr3:8686483/-:-000182657|SSUH2::chr3:8693763/-:-000175377|CAV3::chr3:8775485/+:0000093655|OXTR::chr3:8811299/-:-000057841|OXTR::chr3:8810276/-:-000058864|OXTR::chr3:8810014/-:-000059126
chr1:203594332-203599260	4928	promotor	ATP2B4	5.19	2.91	5.73	5.24	3.23	3.55	3.72	3.16	3.19	3.67	6.7	12.13	9.96	7.28	0.36	1.67	1.79	1.51	73.32	43.86	28.99	33.54	26.76	19.02	ATP2B4	LAX1|ZC3H11A|ATP2B4			LAX1::chr1:203734283/+:-000135023|LAX1::chr1:203739955/+:-000140695|LAX1::chr1:203738765/+:-000139505|LAX1::chr1:203740494/+:-000141234|PRELP::chr1:203452296/+:0000142036|PRELP::chr1:203444882/+:0000149450|ZC3H11A::chr1:203770702/+:-000171442|ZC3H11A::chr1:203786053/+:-000186793|ZC3H11A::chr1:203765420/+:-000166160|ZC3H11A::chr1:203764750/+:-000165490|ZC3H11A::chr1:203772084/+:-000172824|ATP2B4::…
chr10:105397723-105410126	12403	enhancer	CALHM1|CALHM3|CALHM2	12.56	2.91	9.25	4.24	1.61	0.44	5.49	4.21	1.42	-0.14	8.19	11.04	4.33	2.13	3.59	4.57	0.71	0.32	5.54	0.06	19.99	15.81	1.29	0.72		CALHM1|CALHM3|CALHM2			NEURL1::chr10:105253734/+:0000143989|CALHM1::chr10:105218647/-:-000179076|CALHM3::chr10:105238996/-:-000158727|CALHM2::chr10:105209855/-:-000187868|CALHM2::chr10:105211041/-:-000186682|CALHM2::chr10:105212161/-:-000185562
chr2:67150716-67158556	7840	genebody_intron	LOC101060019	3.12	0.08	13.19	5.36	0.31	0.4	6.46	3.97	1.78	1.13	10.78	17.53	6.07	3.06	3.24	4.55	1.41	0.24	-0.24	-0.97	20.32	25.69	1.88	0.16
chr2:152684227-152685774	1547	promotor	ARL5A	-0.37	-0.15	2.6	1.33	1.25	1.67	1.14	1.11	1.45	1.57	0.29	0.13	0.25	0.08	0.11	0.9	-0.26	0.39	15.69	12.61	8.48	7.2	5.97	7.76	ARL5A	ARL5A|NEB			NEB::chr2:152589698/-:-000094529|NEB::chr2:152591000/-:-000093227|NEB::chr2:152590308/-:-000093919|ARL5A::chr2:152671712/-:-000012515|ARL5A::chr2:152671710/-:-000012517|ARL5A::chr2:152670829/-:-000013398|ARL5A::chr2:152685008/-:0000000000|CACNB4::chr2:152830484/-:0000144710
chr13:42268406-42295781	27375	genebody_exon	VWA8|VWA8|VWA8|VWA8|VWA8|VWA8	4.42	1.25	14.42	12.57	1.7	0.77	3.66	5.29	3.27	1.53	17.47	31.61	15.08	9.75	5.16	12.86	4.67	4.89	-2.31	-3.12	7.48	11.59	0.79	-1.15
chr1:215450796-215451396	600	3 prime	KCNK2	0.34	0.16	-0.04	0.14	0.48	0.29	0.02	-0.02	0.3	-0.02	-0.11	0.01	0.53	0.16	-0.03	0.01	0.47	0.39	-0.07	0.15	-0.24	-0.27	0.1	-0.08					KCNK2::chr1:215256559/+:0000194237
chr17:38573026-38575114	2088	promotor	TOP2A	0.76	0.2	0.11	0.17	0.51	2.55	0.79	0.64	1.04	1.98	-0.23	0.21	0.24	0.43	0.6	1.1	0.39	0.91	23.6	30.19	1.93	1.29	5.59	15.39	TOP2A	IGFBP4|GJD3		RARA	RARA::chr17:38474472/+:0000098554|RARA::chr17:38487108/+:0000085918|RARA::chr17:38465422/+:0000107604|RARA::chr17:38498270/+:0000074756|IGFBP4::chr17:38599675/+:-000024561|CCR7::chr17:38721735/-:0000146621|CCR7::chr17:38715193/-:0000140079|CCR7::chr17:38716645/-:0000141531|CCR7::chr17:38712069/-:0000136955|CCR7::chr17:38717264/-:0000142150|WIPF2::chr17:38412642/+:0000160384|WIPF2::chr17:38375573/…
chr14:51769111-51772444	3333	enhancer	FRMD6	2.87	1.54	2.54	1.08	0.2	0.57	1.24	0.96	1.12	1.23	1.14	0.97	0.42	0.48	0.51	0.93	0.82	0.59	0.77	0.04	8.04	4.77	1.34	1.11		FRMD6			FRMD6::chr14:51955838/+:-000183394|TMX1::chr14:51706885/+:0000062226
chr5:39072720-39078133	5413	promotor	RICTOR	-1.11	0.2	7.74	5.46	5.31	5.36	3.67	4.14	4.25	5.39	-0.12	0.46	0.7	1.92	0.5	1.09	1.19	1.99	65.06	51.13	27.56	26.05	37.95	34.43	RICTOR	RICTOR			FYB::chr5:39270758/-:0000192625|FYB::chr5:39219679/-:0000141546|FYB::chr5:39203088/-:0000124955|RICTOR::chr5:39074509/-:0000000000|RICTOR::chr5:38996983/-:-000075737|RICTOR::chr5:39021237/-:-000051483|RICTOR::chr5:38991176/-:-000081544|RICTOR::chr5:39003723/-:-000068997|RICTOR::chr5:38975705/-:-000097015|RICTOR::chr5:39002767/-:-000069953|RICTOR::chr5:38978749/-:-000093971|RICTOR::chr5:39074259/-…
chr16:11317743-11318836	1093	enhancer	RMI2	1.34	0.68	1.09	0.66	0.07	0.3	1.44	0.94	0.78	1.26	0.52	0.24	0.14	0.28	0.65	0.72	0.19	1.09	0.48	0.38	2.24	0.4	0.21	1.39		RMI2			SOCS1::chr16:11349384/-:0000030548|SOCS1::chr16:11350038/-:0000031202|PRM1::chr16:11375191/-:0000056355|TNP2::chr16:11363159/-:0000044323|RMI2::chr16:11439294/+:-000120458|PRM2::chr16:11370336/-:0000051500
chr18:74162194-74172778	10584	promotor	ZNF516	11.78	7.15	5.01	2.74	1.06	2.42	3.28	2.2	3.08	4.11	1.44	1.98	1.16	2.15	0.61	2.24	1.46	1.04	13.84	11.12	22.42	29.1	21.81	18.22	ZNF516	C18orf65|ZNF516		ZNF516	C18orf65::chr18:74207476/+:-000034698|ZNF516::chr18:74175096/-:0000002318|ZNF516::chr18:74207145/-:0000034367|ZNF516::chr18:74155166/-:-000007028|ZNF516::chr18:74175096/-:0000002318|ZNF516::chr18:74207145/-:0000034367|ZNF516::chr18:74155166/-:-000007028
chr12:51344565-51345598	1033	enhancer	LETMD1	0.29	0	1.14	0.91	0.07	0.12	0.5	0.25	0.16	0	3.34	4.35	1.4	1.71	0.33	0.57	0.27	0.05	0.09	-0.04	0.02	0	-0.04	0		LETMD1		ATF1	LETMD1::chr12:51442081/+:-000096483|SLC11A2::chr12:51403052/-:0000057454|SLC11A2::chr12:51422057/-:0000076459|SLC11A2::chr12:51404548/-:0000058950|SLC11A2::chr12:51419923/-:0000074325|SLC11A2::chr12:51420198/-:0000074600|CSRNP2::chr12:51477453/-:0000131855|CSRNP2::chr12:51470429/-:0000124831|TMPRSS12::chr12:51236700/+:0000107865|ATF1::chr12:51157788/+:0000186777|ATF1::chr12:51173922/+:0000170643|…
chr11:47197728-47208507	10779	promotor	ARFGAP2|PACSIN3	4.82	3.13	5.12	2.2	1.91	3.59	3.43	3.89	3.02	4.41	0.01	-0.23	0.14	0.03	0.87	1.93	0.92	1.22	48.08	44.52	19.49	16.43	11.48	14.61	ARFGAP2|PACSIN3	MADD|DDB2|NR1H3		SPI1|NR1H3	MADD::chr11:47295377/+:-000086870|MADD::chr11:47291670/+:-000083163|MADD::chr11:47291198/+:-000082691|MADD::chr11:47290926/+:-000082419|SPI1::chr11:47400126/-:0000191619|ACP2::chr11:47270397/-:0000061890|ACP2::chr11:47269277/-:0000060770|ACP2::chr11:47266972/-:0000058465|ACP2::chr11:47267384/-:0000058877|ACP2::chr11:47270178/-:0000061671|ACP2::chr11:47269683/-:0000061176|MYBPC3::chr11:47374252/-:…
chr5:95095511-95096967	1456	enhancer	SPATA9	2.2	1.62	2.09	1.39	0.68	0.79	0.89	0.8	0.97	0.67	8.65	12.42	10.79	9.81	0.92	0.51	0.73	1.4	0.66	1.03	1.77	1.45	2.72	1.9		SPATA9			SPATA9::chr5:95018713/-:-000076798|RHOBTB3::chr5:95066849/+:0000028662|RFESD::chr5:94989764/+:0000105747|RFESD::chr5:94982582/+:0000112929|RFESD::chr5:94987840/+:0000107671|RFESD::chr5:94982480/+:0000113031|GLRX::chr5:95158576/-:0000061609
chr1:234724444-234768397	43953	promotor	IRF2BP2	20.87	23.91	119.29	50.45	37.82	54.6	39.79	29.74	41.75	45.44	60.83	91.55	74.97	64.36	7.66	18.86	12.7	16.84	120.48	83.26	231.51	218.11	154.59	149.19	IRF2BP2				IRF2BP2::chr1:234745270/-:0000000000
chr16:3225208-3242134	16926	enhancer	HCFC1R1|ZNF75A|PKMYT1|CCDC64B|OR2C1|ZNF263|ZSCAN10|CLDN6	7.59	5.77	4.54	5.33	5.17	6.17	2.46	1.63	4.19	6.28	1.1	1.71	5.14	6.38	-0.01	0.7	0.25	1.42	59.01	55.99	12.24	8	12.9	15.49		HCFC1R1|ZNF75A|PKMYT1|CCDC64B|OR2C1|ZNF263|ZSCAN10|CLDN6	PKMYT1	ZNF205|ZNF200|ZNF213|ZNF75A|ZNF263|ZSCAN10	ZNF205::chr16:3163417/+:0000061791|ZNF205::chr16:3162579/+:0000062629|ZNF205::chr16:3163349/+:0000061859|ZNF205::chr16:3162562/+:0000062646|ZNF213::chr16:3187166/+:0000038042|ZNF213::chr16:3185133/+:0000040075|ZNF213::chr16:3185056/+:0000040152|ZNF200::chr16:3285185/-:0000043051|ZNF200::chr16:3285455/-:0000043321|ZNF200::chr16:3285456/-:0000043322|ZNF200::chr16:3283835/-:0000041701|HCFC1R1::chr16…
chr6:106949678-106951139	1461	enhancer	QRSL1|AIM1|ATG5	0.76	0.4	0.71	0.94	0.76	1.16	0.06	0.09	0.36	0.46	5.06	6.21	5.36	4.67	0.75	0.54	0.45	1.05	-0.32	-0.11	0.12	0.95	1.28	1.47		QRSL1|AIM1|ATG5			QRSL1::chr6:107077440/+:-000126301|RTN4IP1::chr6:107077372/-:0000126233|AIM1::chr6:106959729/+:-000008590|ATG5::chr6:106773309/-:-000176369|ATG5::chr6:106764140/-:-000185538|ATG5::chr6:106773694/-:-000175984
chr5:112666211-112667319	1108	enhancer	MCC|YTHDC2	1.39	0.27	0.72	0.21	-0.1	-0.09	0.7	0.5	0.23	0.48	3.47	2.44	1.1	1.22	0.41	0.2	0.05	-0.12	0.88	0.08	0.77	0.19	0.04	0.03		MCC|YTHDC2	TSSK1B		TSSK1B::chr5:112770727/-:0000103408|MCC::chr5:112630611/-:-000035600|MCC::chr5:112824526/-:0000157207|MCC::chr5:112630611/-:-000035600|MCC::chr5:112824526/-:0000157207|YTHDC2::chr5:112849390/+:-000182071
chr11:109416933-109426624	9691	3 prime	C11orf87	1.91	2.49	22.26	5.91	1.63	15.15	2.45	1.47	1.66	3.77	10.78	16.52	9.44	8.31	2.2	3.22	1.37	5.27	0.1	0.27	46.15	45.79	33.36	37.21					C11orf87::chr11:109292845/+:0000124088|C11orf87::chr11:109294100/+:0000122833
chr20:23205170-23216696	11526	enhancer	THBD|NXT1|CD93	16.31	11.52	11.65	5.85	4.88	9.46	7.67	1.87	5.79	7.4	23.8	38.8	37.17	31.91	0.87	3.65	3.51	5.6	-1.04	-0.95	34.08	34.72	33.77	31.48		THBD|NXT1|CD93			THBD::chr20:23030300/-:-000174870|SSTR4::chr20:23016056/+:0000189114|NXT1::chr20:23334617/+:-000117921|NXT1::chr20:23331372/+:-000114676|CD93::chr20:23066976/-:-000138194|NAPB::chr20:23377824/-:0000161128|NAPB::chr20:23383708/-:0000167012|NAPB::chr20:23402155/-:0000185459|NAPB::chr20:23377824/-:0000161128|NAPB::chr20:23383708/-:0000167012|NAPB::chr20:23402155/-:0000185459
chr8:92330107-92332579	2472	promotor	SLC26A7	0.14	2.66	0.42	0.56	0.43	1.51	-0.35	0.29	1.23	-0.1	0.27	1.59	1.88	1.16	0.28	0.46	0.51	0.9	-0.99	-0.4	6.38	16.86	18.02	12.33	SLC26A7	SLC26A7			SLC26A7::chr8:92307758/+:0000022349|SLC26A7::chr8:92261515/+:0000068592|SLC26A7::chr8:92346522/+:-000013943|SLC26A7::chr8:92330443/+:0000000000|SLC26A7::chr8:92301363/+:0000028744|SLC26A7::chr8:92261766/+:0000068341|SLC26A7::chr8:92261846/+:0000068261|SLC26A7::chr8:92221721/+:0000108386|SLC26A7::chr8:92352631/+:-000020052|SLC26A7::chr8:92231117/+:0000098990|SLC26A7::chr8:92307758/+:0000022349|SLC…
chr12:75758472-75759413	941	enhancer	KCNC2|GLIPR1|CAPS2|GLIPR1L2	-0.33	-0.24	0.69	0.65	0.14	-0.1	0.25	0.18	0.23	-0.05	8.53	14.28	10.98	6.95	0.09	0.23	0.06	0	-0.46	-0.44	0.66	0.51	0.61	-0.11		KCNC2|GLIPR1|CAPS2|GLIPR1L2			KCNC2::chr12:75603527/-:-000154945|KCNC2::chr12:75601781/-:-000156691|GLIPR1::chr12:75874512/+:-000115099|KRR1::chr12:75905417/-:0000146004|CAPS2::chr12:75698655/-:-000059817|CAPS2::chr12:75765261/-:0000005848|CAPS2::chr12:75717001/-:-000041471|CAPS2::chr12:75710213/-:-000048259|CAPS2::chr12:75784701/-:0000025288|CAPS2::chr12:75687146/-:-000071326|CAPS2::chr12:75719067/-:-000039405|CAPS2::chr12:7…
chr16:56660606-56661874	1268	promotor	MT1M|MT1E	1.86	1.54	1.68	0.7	0.62	0.54	0.62	0.4	0.95	1.33	0.36	0.28	-0.12	0.46	0.11	0.12	0.2	0.51	-0.25	-0.07	5.57	5.02	4.69	4.21	MT1M|MT1E	BBS2|NUP93|MT1A|MT1X|MT1H|NUDT21|MT1F|MT1B			NUDT21::chr16:56485260/-:-000175346|MT1X::chr16:56716381/+:-000054507|MT3::chr16:56623266/+:0000037340|MT2A::chr16:56642477/+:0000018129|BBS2::chr16:56554007/-:-000106599|NUP93::chr16:56832387/+:-000170513|NUP93::chr16:56815703/+:-000153829|NUP93::chr16:56839415/+:-000177541|NUP93::chr16:56782145/+:-000120271|NUP93::chr16:56764016/+:-000102142|NUP93::chr16:56817412/+:-000155538|NUP93::chr16:56832…
chr13:106093528-106094401	873	enhancer	DAOA	0.13	0.55	0.1	0.08	0	0.55	0.09	0.24	0.3	0.37	0.65	0.92	1.45	1.5	0.04	0.42	0.39	0.58	0.16	0.31	0.05	0.23	0.27	0.35		DAOA			DAOA::chr13:106124886/+:-000030485|DAOA::chr13:106118215/+:-000023814|DAOA::chr13:106118564/+:-000024163|DAOA::chr13:106119355/+:-000024954
chr7:25302115-25302891	776	enhancer	NPVF|C7orf31|CYCS	1.01	0.68	0.55	0.8	0.29	0.36	0.14	-0.01	0.44	0.2	0.25	0.5	0.14	-0.01	0.2	0.38	0.27	0.58	0.17	0.2	0.07	0.27	0.75	0.4		NPVF|C7orf31|CYCS			NPVF::chr7:25268104/-:-000034011|CYCS::chr7:25163745/-:-000138370|CYCS::chr7:25164979/-:-000137136|C7orf31::chr7:25218950/-:-000083165|C7orf31::chr7:25219816/-:-000082299
chr8:103664754-103670742	5988	promotor	KLF10	2.26	0.4	8.27	8.77	6.95	8	8.17	7.59	10.47	12.16	7.55	13.25	10.44	12.26	0.81	2.19	2.7	3.46	57.36	54.54	31.55	25.45	36.19	47.54	KLF10			KLF10	ODF1::chr8:103563847/+:0000100907|KLF10::chr8:103668129/-:0000000000|KLF10::chr8:103666191/-:0000000000|AZIN1::chr8:103870377/-:0000199635|AZIN1::chr8:103855974/-:0000185232|AZIN1::chr8:103862371/-:0000191629
chr7:106357274-106360301	3027	enhancer	CCDC71L|PIK3CG	0.37	1.85	1.18	0.96	2.59	6.81	-0.76	-0.59	1.12	1.33	2.88	1.63	4.89	4.99	0.11	0.42	1.32	3.19	-1.6	-0.92	4.15	5.55	27.83	23.39		CCDC71L|PIK3CG	PIK3CG		CCDC71L::chr7:106301633/-:-000055641|PIK3CG::chr7:106507994/+:-000147693|PIK3CG::chr7:106505923/+:-000145622|PIK3CG::chr7:106505722/+:-000145421
chr2:66721546-66724444	2898	genebody_intron	MEIS1	3.25	3.65	2.83	1.98	1.35	1.06	1.98	1.32	2.17	1.64	9.18	14.92	12.61	8.27	1.09	1.02	0.93	0.56	2.09	0.27	12.49	12.34	9.14	4.99				MEIS1	MEIS1::chr2:66662531/+:0000059015
chr11:64602348-64624899	22551	enhancer	RASGRP2|SAC3D1|SNX15|MAP4K2|ARL2|MEN1|SF1|PYGM|PPP2R5B|NRXN2	35.61	24.94	5.95	6.41	5.54	7.43	7.69	4.98	8.12	11.02	3.59	7.41	8.08	8.89	2.07	4.78	3.57	4.47	5.47	4.63	27.91	34.85	45.38	42.76		RASGRP2|SAC3D1|SNX15|MAP4K2|ARL2|MEN1|SF1|PYGM|PPP2R5B|NRXN2	MAP4K2	BATF2	RASGRP2::chr11:64512328/-:-000090020|RASGRP2::chr11:64512927/-:-000089421|RASGRP2::chr11:64510408/-:-000091940|RASGRP2::chr11:64511629/-:-000090719|SAC3D1::chr11:64808375/+:-000183476|SNX15::chr11:64794879/+:-000169980|ARL2::chr11:64781584/+:-000156685|EHD1::chr11:64645958/-:0000021059|EHD1::chr11:64646627/-:0000021728|EHD1::chr11:64647184/-:0000022285|EHD1::chr11:64646239/-:0000021340|GPHA2::chr…
chr15:67315767-67321542	5775	enhancer	SMAD3	14.12	14.56	8.13	7.91	6.32	7.95	4.82	3.13	6.26	5.83	20.89	33.4	32.3	25.55	1.28	3.5	3.06	3.88	0.58	1.14	27.77	39.59	45.06	31.83		SMAD3		SMAD3	SMAD3::chr15:67430358/+:-000108816|SMAD3::chr15:67358194/+:-000036652|SMAD3::chr15:67418053/+:-000096511|SMAD3::chr15:67458492/+:-000136950|SMAD3::chr15:67457232/+:-000135690|SMAD3::chr15:67459116/+:-000137574|SMAD3::chr15:67430358/+:-000108816|SMAD3::chr15:67358194/+:-000036652|SMAD3::chr15:67418053/+:-000096511|SMAD3::chr15:67458492/+:-000136950|SMAD3::chr15:67457232/+:-000135690|SMAD3::chr15:6…
chr1:42679719-42692793	13074	enhancer	RIMKLA|GUCA2A	2.93	2.47	2.07	1.43	-0.51	-0.75	1.54	1.96	0.63	-0.76	8.28	12.99	10.81	7.87	0.84	2.07	0.51	0.32	-0.64	-1.45	8.23	14.49	5.72	1.28		RIMKLA|GUCA2A		FOXJ3	RIMKLA::chr1:42846467/+:-000153674|GUCA2A::chr1:42630394/-:-000049325|GUCA2B::chr1:42619091/+:0000060628|FOXJ3::chr1:42776780/-:0000083987|FOXJ3::chr1:42800902/-:0000108109|FOXJ3::chr1:42801547/-:0000108754|FOXJ3::chr1:42800885/-:0000108092|FOXJ3::chr1:42800635/-:0000107842|FOXJ3::chr1:42781125/-:0000088332|FOXJ3::chr1:42789497/-:0000096704|FOXJ3::chr1:42776780/-:0000083987|FOXJ3::chr1:42800902/-…
chr20:61583439-61585572	2133	promotor	SLC17A9	2.78	0.81	1.41	0.47	0.97	1.42	1.55	0.46	0.8	1.97	-0.05	-0.27	-0.01	0.23	0.75	0.72	0.33	0.51	17.79	20.23	8.68	6.95	8.86	10.6	SLC17A9	TCFL5|DIDO1		TCFL5|BHLHE23	SLC17A9::chr20:61584562/+:0000000000|SLC17A9::chr20:61583998/+:0000000000|TCFL5::chr20:61493114/-:-000090325|MRGBP::chr20:61427804/+:0000155635|GID8::chr20:61572842/+:0000010597|GID8::chr20:61569440/+:0000013999|BHLHE23::chr20:61638386/-:0000052814|COL9A3::chr20:61448413/+:0000135026|OGFR::chr20:61436176/+:0000147263|DPH3P1::chr20:61475917/+:0000107522|DIDO1::chr20:61557902/-:-000025537|DIDO1::ch…
chr6:170892785-170894433	1648	promotor	PDCD2	-0.38	-0.31	2.82	1.97	1.99	2.22	1.41	1.55	1.32	1.38	0.66	0.32	0.34	0.58	0.17	0.49	0.68	0.53	28.73	22.15	7.24	5.08	7.65	8.99	PDCD2	PSMB1			TBP::chr6:170865969/+:0000026816|TBP::chr6:170863420/+:0000029365|TBP::chr6:170870878/+:0000021907|PDCD2::chr6:170893779/-:0000000000|PDCD2::chr6:170893741/-:0000000000|PSMB1::chr6:170862416/-:-000030369
chr11:57194479-57202859	8380	promotor	SLC43A3	2.39	0.35	4.89	1.28	0.83	0.75	2.69	0.75	0.47	0.19	17.64	22.87	18.95	16.02	1.69	1.03	1.18	0.5	3.91	1.65	8.14	4.33	2.95	1.81	SLC43A3	APLNR|SSRP1|SERPING1|PRG3|PRG2|TNKS1BP1|SMTNL1|RTN4RL2		SSRP1	APLNR::chr11:57004926/-:-000189553|SSRP1::chr11:57103350/-:-000091129|SSRP1::chr11:57102713/-:-000091766|UBE2L6::chr11:57335802/-:0000132943|UBE2L6::chr11:57335179/-:0000132320|UBE2L6::chr11:57327904/-:0000125045|UBE2L6::chr11:57322095/-:0000119236|SERPING1::chr11:57365721/+:-000162862|SERPING1::chr11:57365704/+:-000162845|SERPING1::chr11:57365026/+:-000162167|PRG3::chr11:57148622/-:-000045857|PR…
chr2:152117158-152119020	1862	promotor	RBM43	-0.22	-0.01	2.26	1.64	1.21	2.24	1.49	1.04	1.11	1.74	2.35	3.52	1.69	1.72	0.41	0.88	0.56	0.43	14.98	12.82	13.46	13.72	11.61	10.36	RBM43	TNFAIP6|RIF1			TNFAIP6::chr2:152214105/+:-000095085|RBM43::chr2:152118388/-:0000000000|RIF1::chr2:152266399/+:-000147379|RIF1::chr2:152266927/+:-000147907|RIF1::chr2:152266603/+:-000147583|RIF1::chr2:152266396/+:-000147376|NMI::chr2:152146429/-:0000027409|NMI::chr2:152139467/-:0000020447
chr2:119444737-119480627	35890	3 prime	EN1	11.27	6.68	12.73	10.22	4.22	8.37	5.73	5.51	4.58	5.58	15.41	23.6	14.88	11.75	3.68	10.03	4.38	4.92	-5.05	-2.56	19.69	43.99	26.46	20.3				EN1	EN1::chr2:119605758/-:0000125131
chr8:23710712-23712810	2098	promotor	STC1	0.62	0.51	2.1	1.29	0.59	0.69	1.09	0.74	0.65	0.21	5.49	3.94	2.97	2.56	0.44	0.74	0.52	0.33	14.64	1.97	5.62	2.05	1.57	0.57	STC1	NKX3-1		NKX3-1	STC1::chr8:23712319/-:0000000000|NKX3-1::chr8:23540449/-:-000170263
chr7:73416585-73417699	1114	enhancer	WBSCR27|ELN|LIMK1|EIF4H	2.07	1.66	0.07	-0.21	0.41	0.98	-0.21	0.34	1.05	1.06	-0.54	-0.18	-0.22	0.27	0.05	0.04	0.37	0.65	0.04	1.87	1.41	1.59	7.94	7.57		WBSCR27|ELN|LIMK1|EIF4H	LIMK1		WBSCR27::chr7:73256473/-:-000160112|WBSCR27::chr7:73256854/-:-000159731|ELN::chr7:73442118/+:-000024419|LIMK1::chr7:73498106/+:-000080407|LIMK1::chr7:73507485/+:-000089786|LIMK1::chr7:73498106/+:-000080407|LIMK1::chr7:73507485/+:-000089786|WBSCR28::chr7:73275488/+:0000141097|EIF4H::chr7:73588705/+:-000171006|CLDN4::chr7:73245192/+:0000171393
chr11:31705689-31706557	868	enhancer	IMMP1L	0.12	0.05	-0.19	0	-0.14	0.58	-0.18	-0.13	0.02	0.09	-0.23	-0.17	-0.05	0.73	0.06	-0.22	-0.11	0.68	-0.18	0.08	-0.3	-0.35	-0.09	-0.14		IMMP1L		PAX6	IMMP1L::chr11:31531174/-:-000174515|ELP4::chr11:31531275/+:0000174414|PAX6::chr11:31828472/-:0000121915|PAX6::chr11:31832900/-:0000126343|PAX6::chr11:31828009/-:0000121452|PAX6::chr11:31833730/-:0000127173|PAX6::chr11:31832562/-:0000126005|PAX6::chr11:31832689/-:0000126132|PAX6::chr11:31839508/-:0000132951
chr9:18423736-18443272	19536	enhancer	ADAMTSL1	4.64	-0.51	5.42	3.29	-0.5	0.15	0.23	0.96	-0.94	0.22	12.3	19.8	10.58	6.28	1.91	3.12	0.15	-0.01	-2.07	-2.7	7.66	13.95	-0.72	-0.38		ADAMTSL1			ADAMTSL1::chr9:18474078/+:-000030806
chr17:64242329-64243074	745	enhancer	PRKCA|APOH|CEP112	0.68	1.27	0.47	0.33	0.5	0.28	0.62	0.29	0.47	0.07	6.11	10.66	10.67	7.85	0.04	0.36	0.43	0.51	-0.39	-0.28	-0.13	0.14	0.5	0.02		PRKCA|APOH|CEP112	PRKCA		PRKCA::chr17:64298925/+:-000055851|CEP112::chr17:64188248/-:-000054081|CEP112::chr17:64187986/-:-000054343|CEP112::chr17:64179424/-:-000062905|APOH::chr17:64225555/-:-000016774
chr10:18888046-18917210	29164	enhancer	ARL5B	10.39	9.83	13.77	11.9	5.17	3.59	4.54	5.19	5.45	2.77	14.29	25.45	16.96	12.48	4.44	6.61	4.22	1.8	1.58	1.42	39.62	65.85	26.9	16.46		ARL5B			CACNB2::chr10:18689512/+:0000198534|NSUN6::chr10:18940565/-:0000023355|ARL5B::chr10:18948312/+:-000031102
chr1:120611583-120612415	832	promotor	NOTCH2	-0.37	-0.29	0.79	1.06	1.05	0.7	0.47	0.72	0.97	0.41	-0.06	0.47	0.01	0.26	-0.01	0.19	0.11	0.04	6.32	4.55	5.14	3.99	2.33	4.29	NOTCH2	ADAM30			NOTCH2::chr1:120612316/-:0000000000|ADAM30::chr1:120439146/-:-000172437
chr2:114600907-114601534	627	enhancer	SLC35F5|ACTR3	0.36	0.03	0.59	0.36	0.08	0.1	0.62	0.16	0.21	0.3	3.31	3.89	2.18	1.76	0.4	0.19	0.13	0.05	0.21	0.12	0.78	0.83	0.04	0.07		SLC35F5|ACTR3			SLC35F5::chr2:114514399/-:-000086508|ACTR3::chr2:114670748/+:-000069214|ACTR3::chr2:114648174/+:-000046640|ACTR3::chr2:114674460/+:-000072926|ACTR3::chr2:114647510/+:-000045976
chr2:147381730-147392767	11037	other		-0.73	-0.39	0.23	1.59	0.52	0.18	1.22	1.26	0.55	-0.01	0.98	1.85	0.31	-0.68	0.83	2.22	0.43	0.22	-1.55	-1.21	2.6	3.05	0.63	-1.17
chr10:43248432-43249295	863	enhancer	BMS1|ZNF33B	1.13	0.96	0.69	0.42	0.38	0.14	0.58	0.25	0.54	0.3	0.2	0.49	0.06	0.14	0.27	0.57	0.2	0.14	1.99	1.17	0.26	0.35	0.08	0.3		BMS1|ZNF33B		ZNF33B	BMS1::chr10:43279809/+:-000030514|BMS1::chr10:43277953/+:-000028658|ZNF33B::chr10:43134284/-:-000114148|ZNF33B::chr10:43127471/-:-000120961|ZNF33B::chr10:43132419/-:-000116013|ZNF33B::chr10:43127886/-:-000120546|ZNF33B::chr10:43109415/-:-000139017|ZNF33B::chr10:43109805/-:-000138627|ZNF33B::chr10:43090146/-:-000158286|ZNF33B::chr10:43134284/-:-000114148|ZNF33B::chr10:43127471/-:-000120961|ZNF33B:…
chr1:247000351-247001910	1559	3 prime	CNST|AHCTF1|ZNF695|SCCPDH|ZNF670	0.86	0.47	1.77	1.11	0.7	-0.12	0.5	0.67	0.5	0.23	1.05	1.64	0.93	0.65	0.39	0.65	0.25	0.71	0.41	0.51	2.88	1.66	0.02	-0.14					ZNF695::chr1:247171394/-:0000169484|SCCPDH::chr1:246887377/+:0000112974|AHCTF1::chr1:247094725/-:0000092815
chr5:7802388-7803607	1219	enhancer	MTRR	1.48	-0.02	0.68	1.11	0.48	0	0.17	0.41	0.37	-0.27	10.32	16.98	13.8	9.61	0.41	0.66	0.15	0.1	0.17	-0.21	0.06	0.32	-0.19	-0.3		MTRR			MTRR::chr5:7869216/+:-000065609|MTRR::chr5:7870882/+:-000067275|C5orf49::chr5:7851602/-:0000047995|FASTKD3::chr5:7868308/-:0000064701|FASTKD3::chr5:7869149/-:0000065542
chr8:6483059-6484568	1509	enhancer	ANGPT2|AGPAT5	6.01	5.47	2.9	2.72	1.1	1.45	1.78	0.76	1.6	1.33	7.36	11.53	9.58	8.5	0.86	1.49	1.3	1.78	1.07	1.05	3.05	5.76	5.76	1.76		ANGPT2|AGPAT5			ANGPT2::chr8:6420783/-:-000062276|XKR5::chr8:6682870/-:0000198302|XKR5::chr8:6681251/-:0000196683|AGPAT5::chr8:6565877/+:-000081309
chr11:124932391-124962053	29662	promotor	SLC37A2	27.71	17.25	14.35	18.11	22.67	12.63	6.99	9.19	24.71	10.83	9.1	20.19	17.96	10.12	1.98	10.56	8.2	5.58	27.95	36.53	54.52	106.24	116.81	63.35	SLC37A2	ROBO4|PKNOX2|HEPACAM		PKNOX2	SLC37A2::chr11:124933012/+:0000000000|HEPN1::chr11:124789145/+:0000143246|ROBO3::chr11:124735304/+:0000197087|ROBO4::chr11:124767830/-:-000164561|ROBO4::chr11:124766950/-:-000165441|ROBO4::chr11:124766565/-:-000165826|CCDC15::chr11:124824016/+:0000108375|CCDC15::chr11:124824619/+:0000107772|HEPACAM::chr11:124806307/-:-000126084|TMEM218::chr11:124980641/-:0000018588|TMEM218::chr11:124972704/-:0000…
chr16:30406126-30421208	15082	promotor	ZNF48|ZNF771	9.91	7.32	6.75	3.96	3.49	7.14	3.92	3.59	3.75	8.15	0.47	-0.6	0.32	2.39	1.29	1.38	1.08	1.33	51.98	44.21	19.69	11.21	15.3	26.56	ZNF48|ZNF771	CD2BP2|ITGAL|SEPT1|TBC1D10B		ZNF688|ZNF764|ZNF48|ZNF768|ZNF785|ZNF771	ZNF747::chr16:30546290/-:0000125082|CD2BP2::chr16:30366254/-:-000039872|CD2BP2::chr16:30366681/-:-000039445|CD2BP2::chr16:30366027/-:-000040099|ZNF688::chr16:30583727/-:0000162519|SEPHS2::chr16:30457295/-:0000036087|ZNF764::chr16:30569641/-:0000148433|SULT1A3::chr16:30212045/+:0000194081|SULT1A3::chr16:30210548/+:0000195578|ZNF48::chr16:30406739/+:0000000000|ZNF48::chr16:30389634/+:0000016492|ZNF…
chr19:1057010-1114146	57136	promotor	POLR2E|GPX4|HMHA1	79.33	42.17	39.48	51.84	24.77	16.98	32.38	30.35	29.61	30.52	29.76	55.2	44.21	40	8.64	18.08	10.86	10.26	88.43	67.81	155.56	197.68	95.26	76.78	POLR2E|GPX4|HMHA1	C19orf24|TMEM259|R3HDM4|CIRBP|STK11|EFNA2|MED16|MIDN|ATP5D	STK11	ARID3A	ARID3A::chr19:929261/+:0000127749|ARID3A::chr19:926036/+:0000130974|KISS1R::chr19:917341/+:0000139669|SBNO2::chr19:1132272/-:0000018126|SBNO2::chr19:1154400/-:0000040254|SBNO2::chr19:1174281/-:0000060135|MED16::chr19:891148/-:-000165862|MED16::chr19:893217/-:-000163793|TMEM259::chr19:1021140/-:-000035870|CNN2::chr19:1026273/+:0000030737|R3HDM4::chr19:913224/-:-000143786|CIRBP::chr19:1269264/+:-00…
chr19:3141551-3155936	14385	enhancer	AES|TLE2|CELF5|NCLN|S1PR4|ZNF77	5.68	8.27	1.88	1.24	3.46	5.04	1.77	1.19	3.21	6.54	-0.21	0.37	3.3	3.03	-0.15	0.8	1.36	2.9	-1.27	1.46	10.49	13.55	28.39	26.87		AES|TLE2|CELF5|NCLN|S1PR4|ZNF77		ZNF77	AES::chr19:3062963/-:-000078588|AES::chr19:3062370/-:-000079181|TLE2::chr19:3028379/-:-000113172|TLE2::chr19:3029198/-:-000112353|TLE2::chr19:3028800/-:-000112751|TLE2::chr19:3029611/-:-000111940|TLE2::chr19:3047632/-:-000093919|TLE2::chr19:3029164/-:-000112387|TLE2::chr19:3045796/-:-000095755|CELF5::chr19:3224701/+:-000068765|CELF5::chr19:3224700/+:-000068764|TLE6::chr19:2977535/+:0000164016|TLE…
chr1:246670050-246671197	1147	promotor	SMYD3	-0.27	-0.12	1	0.42	0.23	0.82	0.62	0.36	0.22	0.5	0.07	0.07	-0.13	0.02	0.02	0.14	0.18	0.02	13.68	11.48	2.68	1.62	1.59	2.22	SMYD3	CNST|SMYD3			CNST::chr1:246754813/+:-000083616|CNST::chr1:246729638/+:-000058441|TFB2M::chr1:246729564/-:0000058367|SMYD3::chr1:246580713/-:-000089337|SMYD3::chr1:246518395/-:-000151655|SMYD3::chr1:246670643/-:0000000000|SMYD3::chr1:246580713/-:-000089337|SMYD3::chr1:246518395/-:-000151655|SMYD3::chr1:246670643/-:0000000000
chr1:84712551-84720798	8247	enhancer	DNASE2B|SAMD13	4.44	2.26	4.82	2.7	-0.35	1.53	0.14	-0.39	0.11	0.63	7.61	8.56	6.48	7.73	1.81	1.61	-0.08	0.79	-0.99	-1.02	8.64	10.59	1.91	3.27		DNASE2B|SAMD13	PRKACB		DNASE2B::chr1:84878031/+:-000157233|DNASE2B::chr1:84874033/+:-000153235|DNASE2B::chr1:84876520/+:-000155722|DNASE2B::chr1:84864214/+:-000143416|SAMD13::chr1:84768885/+:-000048087|SAMD13::chr1:84768333/+:-000047535|SAMD13::chr1:84764048/+:-000043250|SAMD13::chr1:84767288/+:-000046490|PRKACB::chr1:84647314/+:0000065237|PRKACB::chr1:84629866/+:0000082685|PRKACB::chr1:84543657/+:0000168894|PRKACB::ch…
chr1:180990566-180992535	1969	promotor	STX6	-0.46	-0.6	2.24	1.46	1.06	1.07	1.2	1.06	1.46	2.25	0.07	0.52	0.75	0.69	0.4	0.92	0.32	0.63	33.84	27.47	8.62	4.76	4.55	7.18	STX6	IER5|MR1|STX6			IER5::chr1:181057637/+:-000065102|KIAA1614::chr1:180882312/+:0000108254|MR1::chr1:181003022/+:-000010487|MR1::chr1:181002560/+:-000010025|STX6::chr1:180962560/-:-000028006|STX6::chr1:180992256/-:0000000000
chr2:38264173-38267244	3071	genebody_intron	RMDN2	2.43	1.5	3.27	1.62	1.11	3.4	2.91	0.95	1.97	2.33	4.87	7.9	6.32	5.09	0.82	1.02	1.16	1.66	2.13	1.89	6.85	8.22	8.74	7.04					RMDN2::chr2:38155901/+:0000108272|RMDN2::chr2:38156404/+:0000107769|RMDN2::chr2:38152461/+:0000111712|RMDN2::chr2:38177586/+:0000086587|CYP1B1::chr2:38303322/-:0000036078|CYP1B1::chr2:38302531/-:0000035287
chr17:38169571-38183989	14418	promotor	CSF3	32.56	29.47	4.32	6.02	6.45	18.47	6.26	4.24	10.48	20.22	0.99	4.45	4.92	4.5	0.19	3.26	4.1	7.63	-0.04	0.52	21.34	32.04	57.27	64.38	CSF3	MSL1|ORMDL3|GSDMB|CASC3|WIPF2|RAPGEFL1|THRA|IKZF3		THRA|NR1D1|IKZF3	MSL1::chr17:38278789/+:-000094800|MSL1::chr17:38279537/+:-000095548|MSL1::chr17:38282435/+:-000098446|ZPBP2::chr17:38024454/+:0000145117|GSDMA::chr17:38119225/+:0000050346|GSDMA::chr17:38121935/+:0000047636|GSDMB::chr17:38073792/-:-000095779|GSDMB::chr17:38073573/-:-000095998|GSDMB::chr17:38074902/-:-000094669|GSDMB::chr17:38073582/-:-000095989|MED24::chr17:38209887/-:0000025898|MED24::chr17:3820…
chr1:57041363-57045987	4624	promotor	PPAP2B	0.57	0.14	6.62	3.33	1.57	2.12	2.84	2.84	2.03	2.23	1	1.51	0.64	0.43	1.06	1.84	0.79	0.35	68.9	32.49	22.1	13.81	10.56	9.89	PPAP2B	PRKAA2	PRKAA2		PPAP2B::chr1:57045256/-:0000000000|PRKAA2::chr1:57110989/+:-000065002
chr5:73567720-73591033	23313	other		4.63	-1.05	18.23	6.33	0.57	2.2	5.71	7.05	1.76	-0.54	12.69	13.48	5.23	4.8	5.11	6.31	2.35	2.71	-7.75	-6.01	22.78	20.48	5.31	3.84
chr3:129573770-129575386	1616	enhancer	TRH|TMCC1	-0.14	0.79	0.48	0.39	0.29	1.38	0.29	0.24	0.51	0.13	1.98	2.97	2.82	3.09	0.53	0.51	0.43	0.78	1.14	0.77	4.77	8.2	11.44	9.13		TRH|TMCC1			TRH::chr3:129694651/+:-000119265|TRH::chr3:129693235/+:-000117849|TMCC1::chr3:129546919/-:-000026851|TMCC1::chr3:129612418/-:0000037032|TMCC1::chr3:129599401/-:0000024015|TMCC1::chr3:129551668/-:-000022102|TMCC1::chr3:129547350/-:-000026420|TMCC1::chr3:129546919/-:-000026851|TMCC1::chr3:129612418/-:0000037032|TMCC1::chr3:129599401/-:0000024015|TMCC1::chr3:129551668/-:-000022102|TMCC1::chr3:129547…
chr2:46843186-46844998	1812	promotor	PIGF|CRIPT	-0.12	0.18	1.63	1.49	1.4	1.62	1.42	1.06	1.17	1.65	0.69	1.28	0.5	0.63	0.54	0.3	0.7	0.57	27.17	21.58	9.02	4.7	6.46	7.6	PIGF|CRIPT	SOCS5|ATP6V1E2			SOCS5::chr2:46926098/+:-000081100|SOCS5::chr2:46985657/+:-000140659|SOCS5::chr2:46926348/+:-000081350|PIGF::chr2:46844250/-:0000000000|PIGF::chr2:46842323/-:-000000863|RHOQ::chr2:46769866/+:0000073320|TMEM247::chr2:46706703/+:0000136483|ATP6V1E2::chr2:46739950/-:-000103236|ATP6V1E2::chr2:46747095/-:-000096091|CRIPT::chr2:46844310/+:0000000000
chr6:73972249-73973364	1115	promotor	KHDC1	0.4	0.69	0.83	0.56	0.17	0.29	0.27	0.58	0.34	0.41	0.26	0.43	0.29	0.37	0.14	0.26	0.21	0.34	6.09	4.29	1.83	2.44	2.26	2.6	KHDC1	DDX43|KHDC1L|KHDC1|KHDC3L|MTO1			DDX43::chr6:74104284/+:-000130920|KHDC1L::chr6:73935174/-:-000037075|KHDC1::chr6:74019937/-:0000046573|KHDC1::chr6:73952252/-:-000019997|KHDC1::chr6:73972918/-:0000000000|KHDC1::chr6:74019937/-:0000046573|KHDC1::chr6:73952252/-:-000019997|KHDC1::chr6:73972918/-:0000000000|KHDC3L::chr6:74072399/+:-000099035|MB21D1::chr6:74162042/-:0000188678|DPPA5::chr6:74063998/-:0000090634|MTO1::chr6:74171453/+:…
chr7:129209210-129210240	1030	enhancer	NRF1	2.24	1.98	0.94	0.75	0.27	0.41	1.09	0.21	0.68	0.67	0.52	0.17	0.62	0.38	0.31	0.13	0.4	0.67	0.31	0.52	4.04	3.37	2.33	2.76		NRF1		NRF1	SMKR1::chr7:129142319/+:0000066891|STRIP2::chr7:129074273/+:0000134937|NRF1::chr7:129317471/+:-000107231|NRF1::chr7:129297182/+:-000086942|NRF1::chr7:129297185/+:-000086945|NRF1::chr7:129269918/+:-000059678|NRF1::chr7:129251542/+:-000041302|NRF1::chr7:129330245/+:-000120005|NRF1::chr7:129317471/+:-000107231|NRF1::chr7:129297182/+:-000086942|NRF1::chr7:129297185/+:-000086945|NRF1::chr7:129269918/+…
chr7:131223157-131224200	1043	genebody_intron	PODXL	1.49	0.7	0.94	0.38	0.1	0.01	0.63	0.18	0.33	0.3	0.23	0.31	-0.01	-0.12	0.26	0.51	0.25	0.07	0.31	-0.08	1.99	2.78	1.19	0.23					PODXL::chr7:131241375/-:0000017175
chr22:43009982-43018072	8090	promotor	POLDIP3	14.27	8.42	7.46	10.66	9.42	7.66	8.11	7.13	15.61	19.54	1.33	1.84	1.39	2.49	0.87	1.29	1.06	1.84	15.5	13.8	31.57	24.1	17.39	20.83	POLDIP3	RRP7A|NFAM1			ATP5L2::chr22:43036606/-:0000018534|CYB5R3::chr22:43032851/-:0000014779|CYB5R3::chr22:43040639/-:0000022567|CYB5R3::chr22:43042706/-:0000024634|CYB5R3::chr22:43045404/-:0000027332|CYB5R3::chr22:43042994/-:0000024922|POLDIP3::chr22:43010967/-:0000000000|SERHL2::chr22:42949867/+:0000060115|RRP7A::chr22:42915828/-:-000094154|NFAM1::chr22:42828400/-:-000181582|A4GALT::chr22:43116875/-:0000098803|A4GA…
chr22:42833293-42833962	669	promotor	NFAM1	0.69	0	0.33	0.41	0.07	0.1	0.2	0.35	0.13	0.3	0.09	0.31	0.19	0.35	0.08	0.25	0.12	0.02	1.71	0.74	0.69	0.13	0.5	0.08	NFAM1	SERHL2			POLDIP3::chr22:43010967/-:0000177005|NFAM1::chr22:42828400/-:-000004893|CYB5R3::chr22:43032851/-:0000198889|RRP7A::chr22:42915828/-:0000081866|SERHL2::chr22:42949867/+:-000115905
chr2:11071838-11077053	5215	enhancer	PDIA6|C2orf50	4.2	4.37	-0.56	-0.43	1.02	2.19	0.2	-0.34	1.17	2.22	-0.84	-0.19	0.97	0.87	-0.24	-0.18	0.49	1.61	-1.03	-0.21	-0.32	-0.68	8.63	9.84		PDIA6|C2orf50			PDIA6::chr2:10959479/-:-000112359|PDIA6::chr2:10950545/-:-000121293|PDIA6::chr2:10952964/-:-000118874|PDIA6::chr2:10972610/-:-000099228|PDIA6::chr2:10978102/-:-000093736|PDIA6::chr2:10961043/-:-000110795|C2orf50::chr2:11273178/+:-000196125|KCNF1::chr2:11052062/+:0000019776
chr1:856055-878866	22811	promotor	SAMD11	33.63	16.41	9.3	6.45	8.55	7.7	6.06	4.16	4.83	7.78	-1.55	-1.04	-0.22	0.74	1.34	4.89	2.38	2.53	60.04	35.77	26.03	17.37	11.92	19.66	SAMD11	KLHL17|AGRN|ISG15|PLEKHN1		HES4	KLHL17::chr1:895966/+:-000017100|PLEKHN1::chr1:901876/+:-000023010|PERM1::chr1:916426/-:0000037560|PERM1::chr1:917496/-:0000038630|NOC2L::chr1:894678/-:0000015812|AGRN::chr1:955502/+:-000076636|ISG15::chr1:948846/+:-000069980|C1orf159::chr1:1026944/-:0000148078|C1orf159::chr1:1027482/-:0000148616|C1orf159::chr1:1051735/-:0000172869|SAMD11::chr1:861301/+:0000000000|SAMD11::chr1:861120/+:0000000000…
chr6:44349158-44350160	1002	enhancer	CDC5L|TCTE1|NFKBIE|SLC35B2|AARS2	0.89	-0.16	0.81	0.32	-0.17	-0.24	0.51	0.11	-0.15	-0.03	5.67	6.47	2.93	1.71	0.11	0	-0.13	-0.26	0.11	-0.22	0.09	-0.18	-0.28	-0.27		CDC5L|TCTE1|NFKBIE|SLC35B2|AARS2		CDC5L	SPATS1::chr6:44310396/+:0000038762|CDC5L::chr6:44355250/+:-000005090|TCTE1::chr6:44255654/-:-000093504|TCTE1::chr6:44265457/-:-000083701|NFKBIE::chr6:44233524/-:-000115634|HSP90AB1::chr6:44216353/+:0000132805|HSP90AB1::chr6:44214694/+:0000134464|HSP90AB1::chr6:44213902/+:0000135256|SLC35B2::chr6:44225088/-:-000124070|SLC35B2::chr6:44225307/-:-000123851|SLC35B2::chr6:44225626/-:-000123532|SLC35B2:…
chr1:226373612-226375336	1724	promotor	ACBD3	-0.19	0.01	3.64	1.8	0.92	1.28	1.28	0.76	0.98	2.38	0.11	0.7	0.25	0.19	0.14	0.29	0.14	0.31	32.33	26.6	16.74	10.4	9.89	11.42	ACBD3	SDE2|MIXL1		MIXL1	ACBD3::chr1:226374422/-:0000000000|SDE2::chr1:226187065/-:-000186547|MIXL1::chr1:226411318/+:-000035982|LIN9::chr1:226497448/-:0000122112|LIN9::chr1:226485513/-:0000110177|LIN9::chr1:226488905/-:0000113569|LIN9::chr1:226497203/-:0000121867|H3F3A::chr1:226250407/+:0000123205|H3F3A::chr1:226252029/+:0000121583
chr2:133038372-133038929	557	enhancer	GPR39|ZNF806	0.02	0.37	0.13	2.11	0.97	0.38	0.41	0.15	0.16	0.82	-0.53	-0.58	-0.44	-0.13	0.45	0.57	0.4	0.56	-0.71	-0.63	-0.76	-0.91	-0.8	-0.44		GPR39|ZNF806			GPR39::chr2:133174146/+:-000135217|ZNF806::chr2:133066838/+:-000027909|ZNF806::chr2:133064716/+:-000025787
chr9:136343355-136358184	14829	promotor	SLC2A6	11.47	4	3.19	1.44	0.95	0.75	2.13	1.52	1.48	3.56	-0.88	-1.19	-1.84	-1.28	0.92	1.3	0.75	0.52	19.86	15.53	12.91	7.57	5.52	6.23	SLC2A6	ADAMTSL2|DBH|MED22|ABO|REXO4|SURF1|SURF4|SURF6			ADAMTSL2::chr9:136397285/+:-000039101|ADAMTSL2::chr9:136401684/+:-000043500|ADAMTSL2::chr9:136399974/+:-000041790|ADAMTSL2::chr9:136397285/+:-000039101|ADAMTSL2::chr9:136401684/+:-000043500|ADAMTSL2::chr9:136399974/+:-000041790|DBH::chr9:136501484/+:-000143300|RPL7A::chr9:136215068/+:0000128287|FAM163B::chr9:136445367/-:0000087183|SLC2A6::chr9:136344275/-:0000000000|MED22::chr9:136213554/-:-00012…
chr5:104727457-104729509	2052	other		-0.27	-0.09	2.38	2.32	1.5	1.74	1.61	1.87	0.68	1.52	0.32	1.36	1.03	0.82	0.81	1.61	1.5	0.84	30.73	21.93	5.99	5.32	4.11	3.68
chr10:93392218-93393772	1554	promotor	PPP1R3C	0.62	0.37	2.46	2.15	1.17	0.83	2.14	1.13	1.45	1.78	0.2	0.28	0.59	0.3	0	0.44	0.13	0.41	11.89	8.32	4.11	2.95	2.39	3.58	PPP1R3C	TNKS2			TNKS2::chr10:93558150/+:-000164378|PPP1R3C::chr10:93392857/-:0000000000
chr1:198528736-198530204	1468	enhancer	PTPRC|ATP6V1G3	0.57	0.68	0.3	1.21	0.37	0.77	0.16	0.18	0.1	-0.01	1.08	2.36	0.84	0.33	0.37	1.41	0.91	0.67	-0.13	-0.39	0.82	5.27	3.87	0.89		PTPRC|ATP6V1G3			PTPRC::chr1:198608355/+:-000078151|PTPRC::chr1:198608097/+:-000077893|ATP6V1G3::chr1:198509814/-:-000018922|ATP6V1G3::chr1:198510074/-:-000018662
chr6:50782764-50790575	7811	promotor	TFAP2B	-0.12	0.26	5.15	2.54	1.46	4.06	0.83	0.84	0.65	1.03	0.54	1.54	0.46	-0.16	1.02	1.85	1.53	1.43	18.28	12.01	16.86	26.49	15.06	15.61	TFAP2B			TFAP2B|TFAP2D	TFAP2B::chr6:50786438/+:0000000000|TFAP2D::chr6:50681256/+:0000101508
chr3:174973237-174985007	11770	genebody_exon	NAALADL2	1.39	7.84	0.31	-1.37	0.45	7.49	-2.15	-0.63	2.08	4.09	9.6	16.17	19.89	18.39	-0.61	0.17	1.48	4.23	-3.84	-2.36	3.58	8.31	30.2	34.35
chr7:915290-916986	1696	promotor	GET4	0.6	-0.06	2.9	2.47	2.07	2.21	1.77	1.64	2.36	3.85	0.52	1.06	1.4	1.18	0.35	0.57	0.25	0.72	15.15	12.25	6.06	2.75	4.23	6.96	GET4	GPR146|CYP2W1|PRKAR1B			GPR146::chr7:1094910/+:-000177924|GPR146::chr7:1097127/+:-000180141|GPR146::chr7:1084208/+:-000167222|GPR146::chr7:1095739/+:-000178753|SUN1::chr7:878434/+:0000036856|SUN1::chr7:856251/+:0000059039|SUN1::chr7:856916/+:0000058374|SUN1::chr7:855193/+:0000060097|SUN1::chr7:872141/+:0000043149|ADAP1::chr7:966851/-:0000049865|ADAP1::chr7:994318/-:0000077332|ADAP1::chr7:960525/-:0000043539|ADAP1::chr7:…
chr14:51297154-51298190	1036	promotor	NIN	-0.42	-0.31	0.64	0.62	0.52	0.71	0.74	0.54	1.13	1.24	0.07	0.46	0.61	0.45	0.35	0.53	0.24	0.24	13.21	9.62	2.75	1.96	1.45	3.26	NIN	NIN|ABHD12B|SAV1			PYGL::chr14:51411247/-:0000113057|NIN::chr14:51288794/-:-000008360|NIN::chr14:51297838/-:0000000000|NIN::chr14:51297234/-:0000000000|ABHD12B::chr14:51338877/+:-000040687|SAV1::chr14:51135070/-:-000162084
chr1:159397883-159400205	2322	enhancer	APCS|OR10J1	1.41	1.86	1.47	0.19	0.07	2.35	0.6	-0.18	0.64	1.21	0.8	0.6	0.21	1.18	0.25	0.01	0.65	1.07	-0.57	0.04	3.88	2.89	2.2	5.53		APCS|OR10J1			APCS::chr1:159557615/+:-000157410|FCER1A::chr1:159259503/+:0000138380|FCER1A::chr1:159272095/+:0000125788|OR10J1::chr1:159409511/+:-000009306
chr3:189304344-189312214	7870	enhancer	TP63	-0.97	-0.18	0.99	-0.04	-0.03	3.22	-0.02	-1.12	1.51	2.03	7.14	9.04	15.02	13.1	0.15	0.78	0.34	2.14	-2.34	-1.54	-0.28	0.6	7.38	5.36		TP63		TP63	TP63::chr3:189507448/+:-000195234|TP63::chr3:189349215/+:-000037001|TP63::chr3:189507448/+:-000195234|TP63::chr3:189349215/+:-000037001
chr10:61631931-61633707	1776	enhancer	SLC16A9|MRLN	1.55	0.86	2.05	1.14	0.53	0.18	1.39	0.52	0.2	0.35	0.75	0.68	0.25	0.16	0.35	0.61	0.49	0.08	1.23	0.15	6.1	3.7	1.55	1.61		SLC16A9|MRLN			SLC16A9::chr10:61469648/-:-000162283|SLC16A9::chr10:61444084/-:-000187847|MRLN::chr10:61498319/-:-000133612|MRLN::chr10:61498876/-:-000133055|MRLN::chr10:61496977/-:-000134954|MRLN::chr10:61513202/-:-000118729|MRLN::chr10:61498319/-:-000133612|MRLN::chr10:61498876/-:-000133055|MRLN::chr10:61496977/-:-000134954|MRLN::chr10:61513202/-:-000118729|CCDC6::chr10:61666413/-:0000032706
chr2:216629285-216639198	9913	genebody_intron	LINC00607	-0.87	0.41	-1.31	-1.5	1.41	-0.27	-0.52	-0.69	0.92	-0.24	-0.13	0.3	4.55	0.99	-0.97	-0.49	0.75	0.59	-2.47	-1.22	-2.34	-2.67	1.43	-0.98
chr20:1246357-1247587	1230	promotor	SNPH	0.07	-0.18	0.91	1.18	0.62	0.25	0.36	0.64	0.42	0.3	0.54	0.19	0.32	0.33	0.44	0.45	0.34	0.3	12.24	7.14	2.43	1.38	1.07	0.69	SNPH	TMEM74B|SNPH			C20orf202::chr20:1184097/+:0000062260|RAD21L1::chr20:1206763/+:0000039594|RAD21L1::chr20:1209065/+:0000037292|PSMF1::chr20:1099239/+:0000147118|PSMF1::chr20:1099395/+:0000146962|PSMF1::chr20:1093905/+:0000152452|TMEM74B::chr20:1165116/-:-000081241|TMEM74B::chr20:1165318/-:-000081039|TMEM74B::chr20:1166076/-:-000080281|TMEM74B::chr20:1164591/-:-000081766|TMEM74B::chr20:1162230/-:-000084127|SNPH::c…
chr6:138187212-138195940	8728	promotor	TNFAIP3	3.14	4.63	10.35	5.24	2.52	4.38	5.69	5.64	5.27	5.3	15.95	20.66	15.74	14.05	2.25	4.75	2.28	3.62	29.95	18.56	31.5	20.31	15.41	20.17	TNFAIP3				TNFAIP3::chr6:138192349/+:0000000000|TNFAIP3::chr6:138188324/+:0000000000
chr6:1187286-1202481	15195	enhancer	FOXQ1|FOXF2	10.63	9.77	12.67	9.28	7.68	6.96	7.76	4.5	12.24	9.33	15.85	26.67	26.45	17.4	3.14	7.7	8.93	9.26	-2	-1.37	32.91	55.86	65.96	27.76		FOXQ1|FOXF2		FOXQ1|FOXF2	FOXQ1::chr6:1312674/+:-000110193|FOXF2::chr6:1390068/+:-000187587
chr8:30580016-30602796	22780	promotor	GSR|UBXN8	18.46	15.72	9	6.98	3.36	5.81	5.47	4.36	6.09	7.1	14.44	20.44	15.14	12.79	2.59	3.44	2.63	5.25	60.94	43.16	35.32	25.74	20.32	26.14	GSR|UBXN8	GTF2E2			SMIM18::chr8:30502797/+:0000077219|SMIM18::chr8:30496116/+:0000083900|SMIM18::chr8:30502008/+:0000078008|SMIM18::chr8:30502797/+:0000077219|SMIM18::chr8:30496116/+:0000083900|SMIM18::chr8:30502008/+:0000078008|PPP2CB::chr8:30670351/-:0000067555|GTF2E2::chr8:30515737/-:-000064279|GTF2E2::chr8:30511118/-:-000068898|GSR::chr8:30585485/-:0000000000|UBXN8::chr8:30601681/+:0000000000
chr11:84021289-84021790	501	enhancer	DLG2	0.12	0	0.04	0.05	0.4	0.07	0.12	0.11	0.39	0.36	0.26	1.75	3.22	1.94	-0.01	0.07	0.31	0.11	0.08	0.02	-0.1	-0.07	0.13	-0.11		DLG2			DLG2::chr11:84028381/-:0000006591|DLG2::chr11:83984322/-:-000036967|DLG2::chr11:84028381/-:0000006591|DLG2::chr11:83984322/-:-000036967
chr9:119859798-119860671	873	genebody_intron	ASTN2	0.26	-0.05	0.36	0.73	0.67	0.07	0.14	0.64	0.16	0.03	2.97	7.55	7.06	4.33	0.26	0.22	0.1	0.09	-0.35	-0.29	0.08	0.61	0.54	0.11
chr19:8052809-8071467	18658	promotor	ELAVL1	21.45	11.42	9.36	6.54	2.05	3.09	8.96	5.67	2.6	4.23	4.61	5.84	0.35	-0.56	2.88	5.1	0.93	1.57	46.36	37.92	58.06	57.8	14.84	18.3	ELAVL1	TIMM44|CCL25|CTXN1|PRR36	MAP2K7		LRRC8E::chr19:7953389/+:0000099420|LRRC8E::chr19:7963545/+:0000089264|LRRC8E::chr19:7960483/+:0000092326|LRRC8E::chr19:7958601/+:0000094208|ELAVL1::chr19:8070528/-:0000000000|ELAVL1::chr19:8056714/-:0000000000|FBN3::chr19:8212384/-:0000140917|TIMM44::chr19:8008707/-:-000044102|EVI5L::chr19:7911385/+:0000141424|EVI5L::chr19:7911381/+:0000141428|EVI5L::chr19:7895160/+:0000157649|EVI5L::chr19:791138…
chr6:4599793-4608324	8531	enhancer	CDYL	12.93	8.69	4.29	6.7	7.22	4.79	2.86	1.62	6.75	7.13	13.56	22.29	23.94	19.7	0.84	3.4	4.61	5.82	6.62	4.75	1.2	0.46	6.75	5.49		CDYL			CDYL::chr6:4776679/+:-000168355|CDYL::chr6:4776679/+:-000168355
chr18:20186617-20187723	1106	enhancer	CTAGE1	1.19	0.15	0.98	0.42	0.11	0.03	-0.04	-0.1	0.05	-0.06	0.34	0.13	0.01	0.04	0.03	0.26	0	-0.2	-0.1	-0.15	0.92	0.84	0.37	-0.04		CTAGE1			CTAGE1::chr18:19997877/-:-000188740
chr6:117995859-117997001	1142	promotor	NUS1	0.81	0.57	1.38	1.3	1.03	1.15	1.22	0.5	1.44	1.37	0.81	0.86	1.01	0.55	0.68	0.52	0.73	0.67	11.14	10.38	3.18	2.59	3.08	4.29	NUS1	GOPC			DCBLD1::chr6:117803819/+:0000192040|GOPC::chr6:117923704/-:-000072155|NUS1::chr6:117996616/+:0000000000
chr1:204113592-204124383	10791	promotor	ETNK2	13.05	1.21	11.12	8.38	0.78	0.07	6.93	9.47	2.92	1.01	5.01	12.17	3.99	1.14	2	6.3	0.52	0.06	22.53	3.17	26.87	36.27	3.91	1.23	ETNK2			SOX13	KISS1::chr1:204165618/-:0000041235|KISS1::chr1:204162041/-:0000037658|SOX13::chr1:204042245/+:0000071347|SOX13::chr1:204082042/+:0000031550|PLEKHA6::chr1:204243936/-:0000119553|PLEKHA6::chr1:204242867/-:0000118484|PLEKHA6::chr1:204243936/-:0000119553|PLEKHA6::chr1:204242867/-:0000118484|GOLT1A::chr1:204183219/-:0000058836|REN::chr1:204135464/-:0000011081|ETNK2::chr1:204121309/-:0000000000|ETNK2::…
chr7:5084875-5086344	1469	promotor	RBAK-RBAKDN|RBAK	0.08	-0.04	2.18	1.03	0.62	1.4	0.85	0.83	0.85	1.85	-0.28	-0.29	-0.46	-0.29	0.16	0.11	0.15	0.06	12.15	9.32	12.09	7.57	8.01	9.32	RBAK-RBAKDN|RBAK	WIPI2|RADIL|MMD2|PAPOLB		RBAK	RBAK-RBAKDN::chr7:5085451/+:0000000000|RBAK-RBAKDN::chr7:5087663/+:-000001319|WIPI2::chr7:5229834/+:-000143490|WIPI2::chr7:5239206/+:-000152862|WIPI2::chr7:5254165/+:-000167821|WIPI2::chr7:5232748/+:-000146404|WIPI2::chr7:5253899/+:-000167555|WIPI2::chr7:5256193/+:-000169849|RBAK::chr7:5085451/+:0000000000|RBAK::chr7:5085552/+:0000000000|RBAK::chr7:5087663/+:-000001319|RBAK::chr7:5085885/+:000000…
chr9:91650879-91651677	798	genebody_intron	SHC3	0.17	0.28	0.08	0.54	0.11	-0.04	0.51	0.07	0.4	0.03	-0.1	0	0.24	-0.04	0.08	0.34	0.13	0	0.73	0.28	0.12	0.42	0.12	-0.15					S1PR3::chr9:91606323/+:0000044556|S1PR3::chr9:91615968/+:0000034911|SHC3::chr9:91793681/-:0000142004|C9orf47::chr9:91605777/+:0000045102
chr20:42285426-42296573	11147	promotor	MYBL2	7.63	6.43	1.17	1.28	0.88	3.57	0.93	0.66	1.43	3.68	-0.34	-1.45	-0.99	-0.51	-0.15	0.21	-0.29	0.56	33.26	36.12	4.07	1.36	3.61	10.27	MYBL2		SGK2	L3MBTL1|MYBL2	IFT52::chr20:42223332/+:0000062094|IFT52::chr20:42219252/+:0000066174|SGK2::chr20:42194736/+:0000090690|SGK2::chr20:42187634/+:0000097792|SGK2::chr20:42195112/+:0000090314|SGK2::chr20:42193754/+:0000091672|L3MBTL1::chr20:42143075/+:0000142351|L3MBTL1::chr20:42136319/+:0000149107|L3MBTL1::chr20:42142198/+:0000143228|GTSF1L::chr20:42355641/-:0000059068|SRSF6::chr20:42086503/+:0000198923|MYBL2::chr2…
chr22:31451102-31452370	1268	enhancer	MORC2|RNF185|INPP5J|LIMK2|SMTN	2.15	2.2	2.27	1.75	0.73	1.48	2.83	1.39	1.09	1.16	5.57	8.53	6.22	6.78	0.52	0.89	0.69	1.24	-0.06	0.26	6.26	7.84	4.93	5.64		MORC2|RNF185|INPP5J|LIMK2|SMTN	LIMK2		MORC2::chr22:31354679/-:-000096423|MORC2::chr22:31359319/-:-000091783|MORC2::chr22:31364482/-:-000086620|MORC2::chr22:31352782/-:-000098320|MORC2::chr22:31346430/-:-000104672|SELM::chr22:31503550/-:0000051180|LIMK2::chr22:31608249/+:-000155879|LIMK2::chr22:31644347/+:-000191977|INPP5J::chr22:31518908/+:-000066538|INPP5J::chr22:31520830/+:-000068460|INPP5J::chr22:31520127/+:-000067757|INPP5J::chr2…
chr12:122325620-122327697	2077	promotor	PSMD9|HPD	-0.6	-0.73	5.25	4.38	2	3.49	2.79	0.8	1.81	3.61	1.04	2.38	1.35	1.99	0.22	0.78	0.19	0.73	25.19	23.45	11.7	9.05	8.97	9.76	PSMD9|HPD	MLXIP|WDR66|RHOF|BCL7A|HPD		MLXIP	PSMD9::chr12:122326636/+:0000000000|TMEM120B::chr12:122150657/+:0000174963|SETD1B::chr12:122242637/+:0000082983|MLXIP::chr12:122516633/+:-000188936|WDR66::chr12:122356462/+:-000028765|WDR66::chr12:122359191/+:-000031494|RHOF::chr12:122231593/-:-000094027|BCL7A::chr12:122459791/+:-000132094|HPD::chr12:122326516/-:0000000000|HPD::chr12:122296768/-:-000028852|HPD::chr12:122301501/-:-000024119|HPD::c…
chr12:57547260-57547701	441	enhancer	TMEM194A|STAT6|TAC3|MYO1A|ZBTB39|RDH16|NXPH4|SHMT2	0.22	0.09	0.24	0.26	0.38	0.14	0.21	0.21	0.24	0.13	1.3	3.02	2.76	1.14	-0.01	0.19	-0.03	-0.03	0.16	0.04	0.07	0.24	0.21	0.12		TMEM194A|STAT6|TAC3|MYO1A|ZBTB39|RDH16|NXPH4|SHMT2		STAT6	STAT6::chr12:57501525/-:-000045735|STAT6::chr12:57504088/-:-000043172|STAT6::chr12:57505195/-:-000042065|STAT6::chr12:57501096/-:-000046164|STAT6::chr12:57502081/-:-000045179|LRP1::chr12:57522281/+:0000024979|STAC3::chr12:57644975/-:0000097274|STAC3::chr12:57640683/-:0000092982|STAC3::chr12:57641980/-:0000094279|STAC3::chr12:57643419/-:0000095718|STAC3::chr12:57643090/-:0000095389|GPR182::chr12:5…
chr14:68676962-68679020	2058	genebody_intron	RAD51B	0.51	0.57	4.5	2.29	0.89	1.7	1.44	1.32	1.17	1.19	4.66	6.32	4.99	3.47	0.73	1.09	0.68	0.81	2.02	1.04	5.19	2.86	5.09	2.38
chr8:78156474-78157707	1233	other		-0.21	-0.07	0.88	-0.07	-0.06	-0.27	0.12	0.01	-0.02	-0.1	0.14	0.58	-0.13	0.32	0.19	0.39	0.04	0.06	-0.49	-0.3	0.02	-0.02	-0.36	-0.12
chr1:10752387-10754653	2266	promotor	CASZ1	1.23	0.67	0.83	1.08	0.4	0.35	1.05	0.77	0.39	0.54	0.36	0.07	0.1	0.14	0.25	0.72	0.44	0.26	19.86	11.53	2.5	2.85	0.63	0.59	CASZ1				CASZ1::chr1:10753968/-:0000000000|CASZ1::chr1:10765600/-:0000010947|CASZ1::chr1:10820913/-:0000066260|CASZ1::chr1:10856732/-:0000102079|CASZ1::chr1:10753968/-:0000000000|CASZ1::chr1:10765600/-:0000010947|CASZ1::chr1:10820913/-:0000066260|CASZ1::chr1:10856732/-:0000102079
chr19:18681839-18684085	2246	promotor	UBA52	1.39	1.38	2.45	2.67	1.18	2.26	1.96	1.17	1.98	2.17	1.04	1	0.96	1.56	0.26	0.49	0.4	1.26	28.69	28.92	9.36	5.03	7.12	11.54	UBA52	KLHL26|ISYNA1|C19orf60|LRRC25|CRTC1|TMEM59L|ELL|FKBP8			KLHL26::chr19:18747837/+:-000063752|C19orf60::chr19:18699494/+:-000015409|ELL::chr19:18632936/-:-000048903|CRLF1::chr19:18717659/-:0000033574|UBA52::chr19:18682613/+:0000000000|UBA52::chr19:18684102/+:-000000017|CRTC1::chr19:18794424/+:-000110339|TMEM59L::chr19:18723681/+:-000039596|LRRC25::chr19:18508414/-:-000173425|KXD1::chr19:18672845/+:0000008994|KXD1::chr19:18671229/+:0000010610|KXD1::chr19…
chr17:15602409-15603197	788	promotor	ZNF286A	-0.33	-0.34	0.63	0.23	0.38	0.25	0.38	0.17	0.05	0.41	-0.1	0.2	-0.12	0.05	-0.18	0.08	-0.27	-0.06	0.15	0.35	0.12	0.21	0.46	0.46	ZNF286A	TRIM16|TVP23C-CDRT4|TVP23C|TBC1D26|ZNF286A|CDRT1		ZNF286A	TRIM16::chr17:15555259/-:-000047150|TRIM16::chr17:15580593/-:-000021816|TRIM16::chr17:15586192/-:-000016217|TRIM16::chr17:15584266/-:-000018143|TVP23C-CDRT4::chr17:15466944/-:-000135465|TVP23C::chr17:15466944/-:-000135465|CDRT1::chr17:15523017/-:-000079392|ZNF286A::chr17:15611468/+:-000008271|ZNF286A::chr17:15602890/+:0000000000|ZNF286A::chr17:15609700/+:-000006503|ZNF286A::chr17:15619313/+:-0000…
chr17:41040208-41090395	50187	promotor	G6PC	21.71	12.19	16.64	6.13	-0.87	1.53	7.44	7.89	1.18	-0.13	19.53	25.19	9.03	8.86	2.76	5.37	-1.22	1.85	-4.87	-5.58	27.41	28.06	9.84	6.25	G6PC	BECN1|IFI35|RPL27|RUNDC1|COA3|EZH1|RND2	WNK4		BRCA1::chr17:41276131/-:0000185736|BRCA1::chr17:41277467/-:0000187072|BRCA1::chr17:41277499/-:0000187104|BRCA1::chr17:41258549/-:0000168154|CNTD1::chr17:40950853/+:0000089355|AOC3::chr17:41006464/+:0000033744|AOC3::chr17:41003200/+:0000037008|AOC3::chr17:41005259/+:0000034949|AOC2::chr17:40996608/+:0000043600|BECN1::chr17:40976309/-:-000063899|BECN1::chr17:40975896/-:-000064312|VPS25::chr17:40925…
chr20:43588136-43595625	7489	promotor	TOMM34|STK4	0.71	2.34	2.4	1.67	1.35	2.5	2.98	1.27	2.28	2.77	-0.49	0.31	0.89	0.66	0.32	1.87	0.54	0.42	41.48	34.18	11.96	7.68	12.21	17.47	TOMM34|STK4	RIMS4	STK4		WFDC12::chr20:43753105/-:0000157480|PABPC1L::chr20:43538702/+:0000049434|YWHAB::chr20:43514239/+:0000073897|YWHAB::chr20:43530171/+:0000057965|YWHAB::chr20:43516288/+:0000071848|TOMM34::chr20:43589113/-:0000000000|STK4::chr20:43595119/+:0000000000|KCNS1::chr20:43729752/-:0000134127|KCNS1::chr20:43729001/-:0000133376|KCNS1::chr20:43727879/-:0000132254|RIMS4::chr20:43438978/-:-000149158|WFDC5::chr2…
chr5:143520991-143522528	1537	enhancer	KCTD16	-0.21	-0.08	1.05	0.78	0.25	1.14	0.3	0.45	0.76	0.57	0.65	1.59	1.9	0.88	0.05	0.47	0.11	0.16	-0.95	-0.64	1.85	2.84	2.97	1.79		KCTD16			YIPF5::chr5:143545167/-:0000022639|YIPF5::chr5:143549528/-:0000027000|YIPF5::chr5:143550277/-:0000027749|KCTD16::chr5:143553869/+:-000031341|KCTD16::chr5:143550436/+:-000027908|KCTD16::chr5:143585951/+:-000063423
chr16:69758320-69762472	4152	promotor	NQO1	-0.3	-0.31	6.75	4.68	5.2	6.62	4.66	3.36	6	6.15	0.6	2.63	1.87	2.06	0.98	1.74	0.86	1	55.61	45.86	43.96	45.15	42.4	43.85	NQO1	WWP2		NFAT5	NFAT5::chr16:69602397/+:0000155923|NFAT5::chr16:69680419/+:0000077901|NFAT5::chr16:69680930/+:0000077390|NFAT5::chr16:69660305/+:0000098015|NFAT5::chr16:69599868/+:0000158452|NFAT5::chr16:69602397/+:0000155923|NFAT5::chr16:69680419/+:0000077901|NFAT5::chr16:69680930/+:0000077390|NFAT5::chr16:69660305/+:0000098015|NFAT5::chr16:69599868/+:0000158452|NOB1::chr16:69788870/-:0000026398|WWP2::chr16:698…
chr20:17919467-17920268	801	enhancer	MGME1|PET117	0.26	0.23	0.5	0.5	0.55	0.08	0.34	0.56	0.5	0.56	0.19	0.55	0.87	0.37	0.35	0.27	0.21	0.28	0.03	-0.05	0.16	0.37	0.08	0.17		MGME1|PET117		OVOL2	MGME1::chr20:17950443/+:-000030175|MGME1::chr20:17949761/+:-000029493|PET117::chr20:18118498/+:-000198230|OVOL2::chr20:18022366/-:0000102098|OVOL2::chr20:18037520/-:0000117252|OVOL2::chr20:18038525/-:0000118257|OVOL2::chr20:18039831/-:0000119563|SNX5::chr20:17936118/-:0000015850|SNX5::chr20:17937680/-:0000017412|SNX5::chr20:17949633/-:0000029365|SNX5::chr20:17934760/-:0000014492|SNX5::chr20:17949…
chr17:65417585-65431835	14250	enhancer	PSMD12|HELZ	7.75	14.02	-2.2	-0.88	3.16	2.46	-1.26	-0.56	5.37	5.58	4.66	10.97	20.62	16.12	-1.28	-0.33	5.5	5.53	-3.65	-1.56	-4.27	-4.2	22.76	9.2		PSMD12|HELZ			PSMD12::chr17:65362720/-:-000054865|PITPNC1::chr17:65373396/+:0000044189|HELZ::chr17:65239954/-:-000177631|HELZ::chr17:65235604/-:-000181981|HELZ::chr17:65241318/-:-000176267
chr22:25347685-25390807	43122	enhancer	TMEM211|KIAA1671|PIWIL3	65.61	60.36	15.86	13	11.82	15.5	15.62	15.58	24.54	21.03	8.49	13.33	11.75	10.12	3.95	6.46	8.32	9.67	34.39	31.13	79.39	90.04	128.86	89.61		TMEM211|KIAA1671|PIWIL3			TMEM211::chr22:25335313/-:-000012372|TMEM211::chr22:25334253/-:-000013432|KIAA1671::chr22:25423940/+:-000033133|PIWIL3::chr22:25158487/-:-000189198|PIWIL3::chr22:25170686/-:-000176999|SGSM1::chr22:25202187/+:0000145498
chr8:22592053-22592997	944	enhancer	EGR3|BIN3	0.26	0.33	0.61	-0.05	0.07	0.19	0.52	0.13	0.12	0.24	0.61	0.06	-0.22	-0.04	0.33	0.21	0.03	0.15	0.11	0.33	0.57	-0.01	-0.13	0.2		EGR3|BIN3		EGR3	C8orf58::chr8:22457113/+:0000134940|PDLIM2::chr8:22437986/+:0000154067|PDLIM2::chr8:22436253/+:0000155800|EGR3::chr8:22550092/-:-000041961|EGR3::chr8:22549901/-:-000042152|EGR3::chr8:22548994/-:-000043059|EGR3::chr8:22550814/-:-000041239|PEBP4::chr8:22785420/-:0000192423|PEBP4::chr8:22785232/-:0000192235|CCAR2::chr8:22462538/+:0000129515|CCAR2::chr8:22463248/+:0000128805|SORBS3::chr8:22423857/+:0…
chr5:76462515-76478553	16038	enhancer	ZBED3|PDE8B	12.24	5.18	10.62	8.56	0.58	0.15	5.72	5.44	0.48	0.58	6.7	13.16	0.77	0.02	4.07	7.09	0.65	-0.71	4.26	0.35	21.21	36.16	2.83	-0.47		ZBED3|PDE8B		ZBED3	AGGF1::chr5:76326209/+:0000136306|ZBED3::chr5:76373719/-:-000088796|ZBED3::chr5:76374552/-:-000087963|ZBED3::chr5:76383029/-:-000079486|PDE8B::chr5:76506705/+:-000028152
chr7:126338462-126341825	3363	genebody_intron	GRM8	0.09	0.37	-0.98	-0.06	1.16	0.74	-0.44	-0.12	2.09	0.26	-0.02	1.09	5.19	2.8	-0.16	0.1	1.22	1.15	-0.82	-0.38	-0.4	0.69	8.55	4.91
chr8:107057685-107074399	16714	genebody_exon	ZFPM2-AS1|ZFPM2-AS1	0.84	5.8	2.65	2.62	6.67	5	-0.73	1.98	7.22	3.58	2.95	8.27	11.89	9.37	-0.19	2.53	5.35	3.51	17.45	22.62	9.78	26.24	76.68	35.98
chr7:46850659-46851835	1176	other		1.91	1.24	1.3	0.54	0.2	0.22	0.64	0.45	0.23	0.41	0.37	0.48	0.44	0.33	0.41	0.26	0.36	0.16	0.15	0	1.38	2.49	0.84	0.36
chr5:141347918-141350544	2626	promotor	RNF14	-0.4	0.37	3.75	2.88	1.69	2.6	2.32	1.53	1.53	2.03	0.29	0.26	0.14	0.07	0.57	1.22	0.64	0.13	25.64	19.61	15.34	11.33	10.88	10.07	RNF14	RNF14|PCDH1|PCDH12|NDFIP1			RNF14::chr5:141348711/+:0000000000|RNF14::chr5:141346401/+:0000001517|RNF14::chr5:141353147/+:-000002603|RNF14::chr5:141357867/+:-000007323|RNF14::chr5:141350268/+:0000000000|RNF14::chr5:141348450/+:0000000000|PCDH1::chr5:141245766/-:-000102152|PCDH1::chr5:141244991/-:-000102927|PCDH1::chr5:141257974/-:-000089944|PCDH1::chr5:141249191/-:-000098727|GNPDA1::chr5:141392619/-:0000042075|GNPDA1::chr5:…
chr17:18128250-18129592	1342	promotor	LLGL1	-0.08	-0.08	0.92	0.06	0.35	0.47	0.45	-0.12	0.64	0.73	-0.32	-0.1	-0.35	0.02	0.11	0.06	-0.23	0.27	10.05	6.8	3.83	1.69	1.74	3.13	LLGL1	ATPAF2|SMCR8|MIEF2|EVPLL			ATPAF2::chr17:17942479/-:-000185771|DRG2::chr17:17991180/+:0000137070|LLGL1::chr17:18128935/+:0000000000|GID4::chr17:17942610/+:0000185640|SMCR8::chr17:18218593/+:-000089001|FLII::chr17:18161869/-:0000032277|FLII::chr17:18162229/-:0000032637|SHMT1::chr17:18250969/-:0000121377|SHMT1::chr17:18259313/-:0000129721|SHMT1::chr17:18257130/-:0000127538|SHMT1::chr17:18266876/-:0000137284|MIEF2::chr17:1816…
chr17:6827192-6831610	4418	enhancer	TEKT1|C17orf49|BCL6B|ALOX12|SLC16A13|RNASEK	1.5	0.59	3.8	0.15	0.01	0.02	1.35	0.7	0.1	0.34	9.04	12.21	10.26	10.03	1.25	0.28	0.11	0.04	0.27	-0.69	3.87	1.79	0.41	2.69		TEKT1|C17orf49|BCL6B|ALOX12|SLC16A13|RNASEK		BCL6B	CLEC10A::chr17:6982203/-:0000150593|CLEC10A::chr17:6983599/-:0000151989|XAF1::chr17:6659155/+:0000168037|RNASEK::chr17:6915735/+:-000084125|TEKT1::chr17:6733711/-:-000093481|TEKT1::chr17:6735059/-:-000092133|C17orf49::chr17:6918055/+:-000086445|ASGR2::chr17:7018129/-:0000186519|ASGR2::chr17:7017716/-:0000186106|ASGR2::chr17:7017628/-:0000186018|SLC16A11::chr17:6947241/-:0000115631|ALOX12::chr17:6…
chr15:65578116-65598083	19967	promotor	PARP16	1.85	3.07	16.04	25.4	22.28	15.57	12.51	17.28	37.09	42.66	3.62	7.5	7.15	7.96	1.4	1.77	0.44	1.44	21.07	13.45	18.57	14.6	14.64	19.9	PARP16	CLPX|CILP|PDCD7|UBAP1L			CLPX::chr15:65477562/-:-000100554|PARP16::chr15:65579017/-:0000000000|CILP::chr15:65502198/-:-000075918|CILP::chr15:65503839/-:-000074277|PDCD7::chr15:65426173/-:-000151943|IGDCC3::chr15:65670377/-:0000072294|IGDCC4::chr15:65715409/-:0000117326|UBAP1L::chr15:65398696/-:-000179420
chr16:85202251-85203929	1678	enhancer	FAM92B|ZDHHC7	3.63	1.8	1.41	0.81	0.93	1.23	1.21	0.71	0.95	1.76	0.11	0.25	0.54	0.44	0.28	0.38	0.24	0.09	6.72	6.86	2.54	1.49	2.14	4.02		FAM92B|ZDHHC7			FAM92B::chr16:85146113/-:-000056138|ZDHHC7::chr16:85024240/-:-000178011|ZDHHC7::chr16:85045140/-:-000157111|ZDHHC7::chr16:85029612/-:-000172639|KIAA0513::chr16:85096817/+:0000105434|KIAA0513::chr16:85100505/+:0000101746|KIAA0513::chr16:85061356/+:0000140895|KIAA0513::chr16:85096817/+:0000105434|KIAA0513::chr16:85100505/+:0000101746|KIAA0513::chr16:85061356/+:0000140895
chr16:2509444-2525838	16394	promotor	NTN3|C16orf59|TBC1D24	24.76	10.83	13.16	5.14	4.2	11.22	11.24	6.06	6.64	13.88	2.49	0.43	-0.02	2.71	2.15	2.56	1.46	2.66	63.71	51.99	65.68	31.1	27.08	56.75	NTN3|C16orf59|TBC1D24	ATP6V0C|RNPS1|AMDHD2|ABCA3|TBC1D24|PDPK1	PDPK1		ATP6V0C::chr16:2563870/+:-000038032|ATP6V0C::chr16:2564080/+:-000038242|ATP6V0C::chr16:2563726/+:-000037888|RNPS1::chr16:2314760/-:-000194684|RNPS1::chr16:2317337/-:-000192107|RNPS1::chr16:2317886/-:-000191558|RNPS1::chr16:2318412/-:-000191032|NTN3::chr16:2521499/+:0000000000|CCNF::chr16:2479394/+:0000030050|AMDHD2::chr16:2570362/+:-000044524|C16orf59::chr16:2510114/+:0000000000|ABCA3::chr16:2376…
chr18:43898628-43913983	15355	promotor	RNF165	14.24	9.53	9.89	11.35	2.37	2.87	5.47	6.89	3.8	2.96	11.38	29.04	15.1	7.59	3.19	11.28	4.76	2.96	1.2	0.54	28.4	67.69	23.56	17.31	RNF165	RNF165			LOXHD1::chr18:44099048/-:0000185065|LOXHD1::chr18:44098218/-:0000184235|LOXHD1::chr18:44099048/-:0000185065|LOXHD1::chr18:44098218/-:0000184235|C18orf25::chr18:43795776/+:0000102852|C18orf25::chr18:43753987/+:0000144641|RNF165::chr18:43914186/+:-000000203|RNF165::chr18:44027525/+:-000113542|RNF165::chr18:43914186/+:-000000203|RNF165::chr18:44027525/+:-000113542
chr3:114081116-114082280	1164	enhancer	ZBTB20|ZNF80|DRD3	-0.04	-0.12	0.24	0.61	0.11	0.23	-0.09	0.04	-0.05	0.07	0.28	0.31	0.23	0.27	0.1	0.59	0.55	-0.09	-0.39	-0.22	-0.3	0.21	-0.27	-0.25		ZBTB20|ZNF80|DRD3		ZBTB20|ZNF80	TIGIT::chr3:114012832/+:0000068284|ZNF80::chr3:113956424/-:-000124692|DRD3::chr3:113895039/-:-000186077|DRD3::chr3:113918253/-:-000162863|DRD3::chr3:113890873/-:-000190243|DRD3::chr3:113897622/-:-000183494|DRD3::chr3:113897898/-:-000183218|DRD3::chr3:113895039/-:-000186077|DRD3::chr3:113918253/-:-000162863|DRD3::chr3:113890873/-:-000190243|DRD3::chr3:113897622/-:-000183494|DRD3::chr3:113897898/-:…
chr16:81109640-81111747	2107	promotor	C16orf46	0.23	0	2.79	2.51	1	1.59	1.94	1.81	0.27	1.16	0.45	0.01	0.03	0.15	0.48	1.06	0.07	0.34	36.45	27.89	13.78	8.75	8.25	10.56	C16orf46	C16orf46|BCO1|CMC2			CENPN::chr16:81045534/+:0000064106|CENPN::chr16:81040102/+:0000069538|C16orf46::chr16:81097597/-:-000012043|C16orf46::chr16:81099885/-:-000009755|C16orf46::chr16:81110871/-:0000000000|C16orf46::chr16:81097597/-:-000012043|C16orf46::chr16:81099885/-:-000009755|C16orf46::chr16:81110871/-:0000000000|PKD1L2::chr16:81214966/-:0000103219|BCO1::chr16:81272295/+:-000160548|ATMIN::chr16:81069457/+:0000040…
chr1:181011749-181012616	867	enhancer	IER5|STX6	1.3	-0.04	0.64	0.26	0.08	0.2	0.29	0.18	0.26	0	4.55	5.75	3.34	3.68	0.29	0.18	0.15	0.09	-0.02	-0.03	0.45	0.24	0	0.37		IER5|STX6			IER5::chr1:181057637/+:-000045021|KIAA1614::chr1:180882312/+:0000129437|MR1::chr1:181003022/+:0000008727|MR1::chr1:181002560/+:0000009189|STX6::chr1:180962560/-:-000049189|STX6::chr1:180992256/-:-000019493
chr16:87902494-87905769	3275	promotor	SLC7A5	1.8	0.97	2.72	2.9	1.88	3.05	1.22	1.43	1.07	2.62	3.75	6.02	4.65	4.86	0.4	0.99	0.38	0.96	2.4	2.4	7.44	6.17	2.53	7.7	SLC7A5	KLHDC4|BANP			CA5A::chr16:87970111/-:0000064342|SLC7A5::chr16:87903099/-:0000000000|BANP::chr16:88003623/+:-000097854|BANP::chr16:87985037/+:-000079268|BANP::chr16:88008653/+:-000102884|BANP::chr16:87993476/+:-000087707|BANP::chr16:88003623/+:-000097854|BANP::chr16:87985037/+:-000079268|BANP::chr16:88008653/+:-000102884|BANP::chr16:87993476/+:-000087707|KLHDC4::chr16:87799597/-:-000102897
chr12:58051387-58052114	727	enhancer	B4GALNT1|ARHGAP9|DCTN2|MARCH9|TSFM|OS9|DDIT3|METTL21B|TSPAN31	0.32	-0.03	0.31	0.67	0.04	-0.13	0.3	0.31	0.05	0.07	3.44	5.68	3.86	1.66	0.41	0.14	-0.21	-0.08	-0.06	-0.27	0.27	0.14	0.15	-0.23		B4GALNT1|ARHGAP9|DCTN2|MARCH9|TSFM|OS9|DDIT3|METTL21B|TSPAN31	PIP4K2C|CDK4	GLI1|DDIT3	B4GALNT1::chr12:58026463/-:-000024924|B4GALNT1::chr12:58025915/-:-000025472|B4GALNT1::chr12:58027021/-:-000024366|DTX3::chr12:57999353/+:0000052034|DTX3::chr12:57999972/+:0000051415|DTX3::chr12:57998404/+:0000052983|DTX3::chr12:58000225/+:0000051162|DTX3::chr12:57999353/+:0000052034|DTX3::chr12:57999972/+:0000051415|DTX3::chr12:57998404/+:0000052983|DTX3::chr12:58000225/+:0000051162|ARHGAP9::chr1…
chrX:74493457-74494066	609	promotor	UPRT	0.51	0.16	0.36	0.52	0.21	0.33	0.28	0.36	0.24	0.3	0.2	0.32	0.14	0.12	0.12	0.51	0.15	0.05	4.14	2.91	0.72	1.29	0.84	0.63	UPRT	ABCB7			ABCB7::chrX:74376174/-:-000117283|UPRT::chrX:74493893/+:0000000000
chr8:125383473-125385622	2149	promotor	TMEM65	0.22	-0.1	3.63	3.32	2.05	1.95	2.74	1.74	2.13	2.43	1.13	1.71	1.03	0.76	0.74	0.95	0.54	1.06	39.91	29.02	12.29	9.74	8.61	10.8	TMEM65	RNF139|TRMT12|NDUFB9			RNF139::chr8:125487007/+:-000101385|TMEM65::chr8:125384939/-:0000000000|TATDN1::chr8:125531121/-:0000145499|TATDN1::chr8:125551328/-:0000165706|TRMT12::chr8:125463047/+:-000077425|NDUFB9::chr8:125555362/+:-000169740|NDUFB9::chr8:125551342/+:-000165720|NDUFB9::chr8:125555329/+:-000169707
chr17:54693075-54694413	1338	3 prime	C17orf67|NOG|ANKFN1	0.51	-0.28	2.76	2.44	0.21	0.17	1.4	1.18	0.51	0.46	7.95	11.71	4.54	2.16	0.96	1.38	0.32	0.06	-0.03	-0.3	3.23	7	0.94	-0.08					NOG::chr17:54671059/+:0000022016|C17orf67::chr17:54893370/-:0000198957
chr11:68847483-68857113	9630	enhancer	MRPL21|MRGPRF	8.16	3.18	2.34	0.97	0.6	0.24	2.49	1.29	1.39	2.65	0.67	-0.08	-0.41	-0.07	0.93	1.23	0.93	0.13	2.16	0.52	8.21	5.2	7.85	4.77		MRPL21|MRGPRF			MRPL21::chr11:68671302/-:-000176181|MRPL21::chr11:68665479/-:-000182004|MRPL21::chr11:68668072/-:-000179411|MRPL21::chr11:68664145/-:-000183338|IGHMBP2::chr11:68671318/+:0000176165|TPCN2::chr11:68816349/+:0000031134|MRGPRF::chr11:68777435/-:-000070048|MRGPRF::chr11:68777424/-:-000070059|MRGPRF::chr11:68780849/-:-000066634
chr14:93051922-93053741	1819	genebody_intron	RIN3	4.91	3.15	2.38	1.38	0.36	0.44	1.11	0.9	1.14	1.06	2.89	2.83	1.53	2.25	0.66	1.23	0.54	0.97	1.18	0.51	8.82	8.96	3.85	2.28					RIN3::chr14:92980124/+:0000071798|LGMN::chr14:93215046/-:0000161305|LGMN::chr14:93199159/-:0000145418|LGMN::chr14:93207523/-:0000153782|LGMN::chr14:93215046/-:0000161305|LGMN::chr14:93199159/-:0000145418|LGMN::chr14:93207523/-:0000153782
chr5:16957551-16958502	951	enhancer	MYO10	0.73	0.99	-0.01	-0.45	0.8	0.43	0.3	-0.1	0.13	0.29	0.02	-0.01	0.32	0.14	-0.05	-0.01	0.3	0.29	-0.34	-0.36	0	0.16	0.69	0.98		MYO10			MYO10::chr5:16936384/-:-000021167
chr9:734478-764734	30256	enhancer	DMRT1	13.11	10.86	9.73	9.61	8.52	2.93	5.6	3.22	7.74	4.04	15.23	22.67	28.56	16.66	3.09	6.52	6.27	4.99	-0.65	-0.99	24.44	29.45	36.05	9.78		DMRT1		DMRT1	DMRT1::chr9:841689/+:-000076955|KANK1::chr9:549106/+:0000185372|KANK1::chr9:710803/+:0000023675|KANK1::chr9:706805/+:0000027673|KANK1::chr9:676889/+:0000057589|KANK1::chr9:539515/+:0000194963|KANK1::chr9:540507/+:0000193971|KANK1::chr9:549106/+:0000185372|KANK1::chr9:710803/+:0000023675|KANK1::chr9:706805/+:0000027673|KANK1::chr9:676889/+:0000057589|KANK1::chr9:539515/+:0000194963|KANK1::chr9:540…
chr11:102630818-102631790	972	enhancer	MMP20|MMP8|MMP27	0.26	0.46	-0.24	0.6	1.1	0.15	0.13	0.07	0.33	0.01	3.73	9.75	12.85	10	-0.21	0.37	0.47	0.71	-0.01	-0.13	-0.41	-0.22	-0.28	-0.26		MMP20|MMP8|MMP27			MMP10::chr11:102651358/-:0000019568|MMP12::chr11:102745763/-:0000113973|MMP13::chr11:102826462/-:0000194672|MMP3::chr11:102714341/-:0000082551|MMP8::chr11:102593808/-:-000037010|MMP8::chr11:102593811/-:-000037007|MMP8::chr11:102595684/-:-000035134|MMP27::chr11:102576467/-:-000054351|MMP20::chr11:102496062/-:-000134756|MMP1::chr11:102668965/-:0000037175|MMP1::chr11:102668189/-:0000036399
chr6:16711351-16730190	18839	enhancer	ATXN1	9.93	15.12	3.28	4.66	6.69	5.71	0.35	1.79	7.88	5.71	26.13	49.62	51.48	43.69	1.51	2.93	3.8	4.8	7.33	6.57	3.3	10.59	32.83	21.91		ATXN1			ATXN1::chr6:16586137/-:-000125214|ATXN1::chr6:16761720/-:0000031530|ATXN1::chr6:16658131/-:-000053220|ATXN1::chr6:16522918/-:-000188433|ATXN1::chr6:16753577/-:0000023387|ATXN1::chr6:16754321/-:0000024131|ATXN1::chr6:16586137/-:-000125214|ATXN1::chr6:16761720/-:0000031530|ATXN1::chr6:16658131/-:-000053220|ATXN1::chr6:16522918/-:-000188433|ATXN1::chr6:16753577/-:0000023387|ATXN1::chr6:16754321/-:00…
chr16:11187855-11199893	12038	enhancer	DEXI	10.55	2.58	5.61	4.02	-0.16	0.31	5.28	3.69	0.18	2.44	15.07	21.13	13.54	11.15	2.12	3.07	1.32	0.58	-0.64	-1.54	17.79	20.69	4.66	2.55		DEXI			SOCS1::chr16:11349384/-:0000149491|SOCS1::chr16:11350038/-:0000150145|TNP2::chr16:11363159/-:0000163266|CLEC16A::chr16:11038344/+:0000149511|PRM1::chr16:11375191/-:0000175298|PRM2::chr16:11370336/-:0000170443|DEXI::chr16:11036256/-:-000151599
chr2:228717444-228741901	24457	promotor	DAW1	18.05	19.41	4.71	7.73	12.45	13.86	4.47	3.69	22.12	17.18	8.39	16.13	23.94	17.13	0.11	5.49	9.37	7.45	-0.77	-0.54	17.66	45.25	105.55	55.72	DAW1	SLC19A3			CCL20::chr2:228678557/+:0000038887|DAW1::chr2:228736326/+:0000000000|SLC19A3::chr2:228582744/-:-000134700|SLC19A3::chr2:228567035/-:-000150409
chr12:60726856-60730256	3400	other		0.92	1.2	0	0.22	0.21	2.23	-0.75	-0.32	0.32	0.56	-0.18	1.09	1.21	3.06	0.67	0.3	0.45	2.15	-0.79	-0.49	-0.49	0.91	5.92	6.76
chr3:189489607-189491759	2152	enhancer	TP63	2.65	0.93	1.88	2.88	0.59	2.36	1.77	1.36	1.04	0.51	12.19	17.6	12.87	12.01	0.33	1.78	0.74	1.26	1.39	0.65	0.68	4.04	2.11	1.71		TP63		TP63	TP63::chr3:189507448/+:-000015689|TP63::chr3:189349215/+:0000140392|TP63::chr3:189507448/+:-000015689|TP63::chr3:189349215/+:0000140392
chr4:19740558-19741555	997	other		-0.22	0.37	0.62	0.37	0.76	0.86	0.34	0.52	0.45	0.86	0.58	0.92	1.06	1.25	0.01	0.22	0.28	0.82	0.51	0.33	0.9	1.68	2.49	2.14
chr14:28984498-28985502	1004	other		0	-0.17	0.88	0.33	0.09	0.2	0.41	0.11	0.33	0.63	1.64	2.47	2.24	1.98	0.04	0.16	0.1	0.41	-0.38	-0.2	1.47	1.94	1.8	1.73
chr17:30488283-30489813	1530	enhancer	ZNF207|RHOT1|RHBDL3	2.32	2.86	0.74	0.53	0.94	0.77	0.79	0.6	0.86	1.03	0.72	0.11	0.82	0.73	0.28	0.78	0.9	1.12	0.69	0.98	1.97	2.73	5.26	2.35		ZNF207|RHOT1|RHBDL3			ZNF207::chr17:30677156/+:-000187343|RHOT1::chr17:30503179/+:-000013366|RHOT1::chr17:30469472/+:0000018811|RHOT1::chr17:30498065/+:-000008252|RHOT1::chr17:30498061/+:-000008248|RHOT1::chr17:30509775/+:-000019962|RHOT1::chr17:30502980/+:-000013167|RHOT1::chr17:30502337/+:-000012524|RHOT1::chr17:30500849/+:-000011036|RHOT1::chr17:30499955/+:-000010142|RHOT1::chr17:30503179/+:-000013366|RHOT1::chr17:…
chr6:143264842-143269456	4614	promotor	HIVEP2	-0.73	-0.82	11.13	12.35	9	9.61	6.52	7.83	11.42	9.73	6.29	12.3	9.68	8.85	1.64	3.64	2.13	2.81	76.65	59.47	34.03	40.75	40.5	37.38	HIVEP2	AIG1|HIVEP2		HIVEP2	HIVEP2::chr6:143266337/-:0000000000|HIVEP2::chr6:143097327/-:-000167515|HIVEP2::chr6:143158183/-:-000106659|HIVEP2::chr6:143104751/-:-000160091|HIVEP2::chr6:143096261/-:-000168581|HIVEP2::chr6:143266337/-:0000000000|HIVEP2::chr6:143097327/-:-000167515|HIVEP2::chr6:143158183/-:-000106659|HIVEP2::chr6:143104751/-:-000160091|HIVEP2::chr6:143096261/-:-000168581|HIVEP2::chr6:143266337/-:0000000000|HIV…
chr3:148475052-148475995	943	enhancer	CPA3|CPB1	0.37	0.38	0.66	0.34	0.34	0.53	0.65	0.06	0.51	0.51	2.36	2.48	2.31	1.9	0.57	0.26	0.46	0.32	0.5	0.16	0.09	0.35	-0.02	0.16		CPA3|CPB1			CPA3::chr3:148583042/+:-000107047|AGTR1::chr3:148425730/+:0000049322|AGTR1::chr3:148447966/+:0000027086|AGTR1::chr3:148415657/+:0000059395|AGTR1::chr3:148458775/+:0000016277|AGTR1::chr3:148457586/+:0000017466|CPB1::chr3:148545587/+:-000069592
chr3:35241040-35242421	1381	genebody_intron	LOC101928135	0.45	0.75	1.19	0.68	0.35	0.45	0.61	0.36	0.1	0.27	1.76	1.38	1.23	1.7	0.4	0.59	0.47	0.53	-0.16	-0.43	3.96	6.72	4.11	3.09
chr3:15246905-15248721	1816	promotor	CAPN7	-0.97	-0.85	2.36	1.34	1.12	1.48	1.87	1.41	0.95	1.54	0.77	0.76	0.2	-0.13	-0.14	0.05	0.23	0.23	27.7	23.12	12.69	5.73	4.96	8.92	CAPN7	MRPS25|RBSN			CAPN7::chr3:15247732/+:0000000000|SH3BP5::chr3:15374135/-:0000125414|SH3BP5::chr3:15311383/-:0000062662|SH3BP5::chr3:15345805/-:0000097084|SH3BP5::chr3:15382900/-:0000134179|SH3BP5::chr3:15372072/-:0000123351|MRPS25::chr3:15106815/-:-000140090|RBSN::chr3:15140663/-:-000106242|RBSN::chr3:15139780/-:-000107125|RBSN::chr3:15138216/-:-000108689|RBSN::chr3:15137794/-:-000109111
chr17:55320061-55335189	15128	promotor	MSI2	-1.45	-0.05	5.4	2.85	1.43	2.89	2.86	3.52	3.64	3.13	-0.57	1.04	0.23	0.99	1.12	1.18	0.66	0.95	37.59	28.57	17.72	19.69	14.82	13.01	MSI2				MSI2::chr17:55333930/+:0000000000|MSI2::chr17:55334373/+:0000000000|AKAP1::chr17:55162552/+:0000157509|AKAP1::chr17:55163733/+:0000156328|AKAP1::chr17:55173951/+:0000146110|AKAP1::chr17:55163134/+:0000156927|AKAP1::chr17:55182801/+:0000137260|AKAP1::chr17:55163077/+:0000156984
chr21:38231567-38234510	2943	enhancer	RIPPLY3	2.49	3.97	4.45	1.43	1.24	4.18	2.45	1.08	2.37	3.46	6.27	9.27	8.83	8.43	0.21	1.54	1.12	1.36	1.37	1.22	15.41	16.85	21.9	21.26		RIPPLY3			SIM2::chr21:38071432/+:0000160135|HLCS::chr21:38320586/-:0000086076|HLCS::chr21:38353263/-:0000118753|HLCS::chr21:38334469/-:0000099959|HLCS::chr21:38362544/-:0000128034|HLCS::chr21:38311293/-:0000076783|HLCS::chr21:38318453/-:0000083943|HLCS::chr21:38338955/-:0000104445|RIPPLY3::chr21:38378862/+:-000144352
chr2:194116470-194117144	674	other		-0.2	-0.2	0.47	0.1	-0.11	-0.09	0.6	-0.04	0.24	-0.06	1.4	1.19	1	0.5	0.08	0.13	0.09	0	0.07	-0.11	-0.1	-0.12	-0.13	-0.07
chr11:74383487-74385060	1573	enhancer	RNF169|LIPT2	2.8	2.54	1.78	1.94	1.46	1.17	0.89	0.9	1.63	0.63	2.15	3.99	3.66	3.1	0.49	0.74	0.56	0.69	0.77	0.59	10.35	16.54	10.75	6.15		RNF169|LIPT2			RNF169::chr11:74459912/+:-000074852|POLD3::chr11:74303574/+:0000079913|LIPT2::chr11:74204754/-:-000178733|CHRDL2::chr11:74430347/-:0000045287|CHRDL2::chr11:74422035/-:0000036975|CHRDL2::chr11:74442429/-:0000057369|CHRDL2::chr11:74422411/-:0000037351
chr8:108324438-108325374	936	genebody_intron	ANGPT1	0.29	0.18	0.23	0.68	0.08	0	-0.19	0.26	0.43	-0.01	1.32	3.12	2.28	0.97	-0.05	0.12	0.35	0.17	-0.26	-0.26	0.04	0.35	0	-0.07					ANGPT1::chr8:108510253/-:0000184879
chr10:106204932-106205703	771	enhancer	SORCS3|ITPRIP	1.08	2.44	0.33	0.4	0.97	0.33	0.32	0.23	1.14	1.33	0.25	0.8	1.35	0.85	0.05	0.48	0.94	0.53	0.04	-0.12	0.34	0.19	0.86	0.28		SORCS3|ITPRIP			GSTO2::chr10:106028630/+:0000176302|GSTO2::chr10:106034886/+:0000170046|GSTO2::chr10:106034442/+:0000170490|SORCS3::chr10:106400858/+:-000195155|GSTO1::chr10:106014920/+:0000190012|GSTO1::chr10:106013951/+:0000190981|GSTO1::chr10:106014467/+:0000190465|ITPRIP::chr10:106088749/-:-000116183|ITPRIP::chr10:106093662/-:-000111270|ITPRIP::chr10:106093255/-:-000111677|ITPRIP::chr10:106075821/-:-00012911…
chr11:62521093-62522312	1219	promotor	ZBTB3	-0.04	-0.44	0.66	0.45	0.5	0.73	0.86	0.75	0.87	0.82	-0.09	0.12	0.08	-0.19	0.23	0.64	0.12	0.4	12.01	9.62	8.89	4.87	4.48	5.61	ZBTB3	GANAB|LBHD1|LRRN4CL|C11orf98|B3GAT3|TAF6L|EML3|UBXN1|MTA2|INTS5|TUT1|POLR2G|HNRNPUL2|BSCL2|SLC3A2|EEF1G|TMEM179B		MTA2|ZBTB3	GANAB::chr11:62407202/-:-000113891|GANAB::chr11:62406581/-:-000114512|GANAB::chr11:62414197/-:-000106896|LBHD1::chr11:62439240/-:-000081853|LBHD1::chr11:62437512/-:-000083581|LRRN4CL::chr11:62457370/-:-000063723|LRRN4CL::chr11:62455984/-:-000065109|C11orf98::chr11:62432687/-:-000088406|B3GAT3::chr11:62388764/-:-000132329|B3GAT3::chr11:62389646/-:-000131447|TTC9C::chr11:62495951/+:0000025142|TAF6L…
chr19:47332730-47333557	827	enhancer	STRN4|NPAS1|DACT3|SLC1A5|PRKD2	0.61	0.46	0.61	0.37	0.25	0.41	0.52	0.16	0.23	0.54	-0.04	0.06	0.17	0.36	0.05	0.38	0.27	0.34	0.72	0.65	1.62	1.5	1.05	1.43		STRN4|NPAS1|DACT3|SLC1A5|PRKD2	PRKD2	NPAS1	AP2S1::chr19:47354251/-:0000020694|AP2S1::chr19:47353546/-:0000019989|AP2S1::chr19:47354025/-:0000020468|STRN4::chr19:47249719/-:-000083011|NPAS1::chr19:47524142/+:-000190585|DACT3::chr19:47153128/-:-000179602|DACT3::chr19:47156331/-:-000176399|DACT3::chr19:47164394/-:-000168336|DACT3::chr19:47156068/-:-000176662|DACT3::chr19:47157913/-:-000174817|SLC1A5::chr19:47288133/-:-000044597|SLC1A5::chr19…
chr4:188399381-188402486	3105	genebody_intron	LOC339975	2.17	2.35	2.65	0.39	0.74	1.66	1.87	0.37	0.28	1.13	2.2	2.48	2.5	2.19	0.55	0.4	0.65	1.52	0.88	0.53	4.31	1.47	2.82	3.78
chr13:114301502-114302573	1071	enhancer	ADPRHL1|TMEM255B|GRK1|DCUN1D2	1.8	0.9	0.77	0.68	0.34	0.4	0.85	0.14	0.45	0.69	0.12	0.33	0.17	0.15	0.53	0.51	0	0.54	0.05	0.1	0.76	0.15	0.67	0.41		ADPRHL1|TMEM255B|GRK1|DCUN1D2	GRK1	TFDP1	ADPRHL1::chr13:114103456/-:-000198046|ADPRHL1::chr13:114107838/-:-000193664|ATP4B::chr13:114312512/-:0000009939|TMCO3::chr13:114145307/+:0000156195|TMCO3::chr13:114149816/+:0000151686|TMEM255B::chr13:114462215/+:-000159642|GRK1::chr13:114321596/+:-000019023|DCUN1D2::chr13:114145022/-:-000156480|TFDP1::chr13:114239055/+:0000062447|TFDP1::chr13:114240088/+:0000061414
chr11:47787560-47790518	2958	promotor	FNBP4	-0.2	0.01	5.95	2.53	2.12	4.08	2.15	1.77	2.57	3.52	6.43	9	8.66	8.36	0.35	1.17	0.89	0.88	39.1	37.18	25.75	19.75	19.47	24.98	FNBP4	KBTBD4|AGBL2|C1QTNF4|MTCH2			FAM180B::chr11:47608229/+:0000179331|KBTBD4::chr11:47600566/-:-000186994|KBTBD4::chr11:47599579/-:-000187981|KBTBD4::chr11:47600520/-:-000187040|KBTBD4::chr11:47600566/-:-000186994|KBTBD4::chr11:47599579/-:-000187981|KBTBD4::chr11:47600520/-:-000187040|MTCH2::chr11:47664205/-:-000123355|FNBP4::chr11:47788992/-:0000000000|NUP160::chr11:47870056/-:0000079538|C1QTNF4::chr11:47615960/-:-000171600|C1Q…
chr7:7196429-7198208	1779	enhancer	C1GALT1	-0.41	0.44	1.05	1.31	0.58	1.66	1.21	0.95	1.17	2.13	1.18	2.56	1.37	1.44	0.54	1.12	0.63	1.14	5.23	5.41	8.06	15.65	18.55	14.33		C1GALT1			C1GALT1::chr7:7273933/+:-000075725|C1GALT1::chr7:7222245/+:-000024037
chr3:183164704-183166116	1412	enhancer	MCF2L2|KLHL24	0.05	0.24	2.11	1.95	1.02	1.08	0.67	0.66	1.21	0.88	0.43	0.71	0.62	0.56	0.15	0.93	0.49	0.51	23.11	18.83	8.16	6.29	4.5	4.68		MCF2L2|KLHL24			KLHL6::chr3:183273498/-:0000107382|B3GNT5::chr3:182987285/+:0000177419|B3GNT5::chr3:182971031/+:0000193673|MCF2L2::chr3:183146056/-:-000018648|KLHL24::chr3:183353410/+:-000187294|KLHL24::chr3:183361267/+:-000195151
chr6:112173504-112174941	1437	enhancer	FYN	1.32	0.07	0.56	2.04	0.37	-0.02	0.81	1.59	0.35	0.2	10.92	25.54	15.48	5.99	0.57	0.73	0.22	0.18	0.22	0.06	0.75	3.26	0.06	-0.07		FYN	FYN		FYN::chr6:112194654/-:0000019713|FYN::chr6:112167831/-:-000005673|FYN::chr6:112041264/-:-000132240|FYN::chr6:112080333/-:-000093171|FYN::chr6:112101837/-:-000071667|FYN::chr6:112194654/-:0000019713|FYN::chr6:112167831/-:-000005673|FYN::chr6:112041264/-:-000132240|FYN::chr6:112080333/-:-000093171|FYN::chr6:112101837/-:-000071667
chr6:155804694-155817017	12323	enhancer	NOX3|TFB1M	-0.71	-0.22	2.28	2.1	3.1	8.7	-1.34	-1.36	2.78	3.3	19.47	29.31	35.03	27.9	0.03	1.28	4.24	5.09	-4.06	-2.95	0.99	1.83	28.61	26.99		NOX3|TFB1M			NOX3::chr6:155777036/-:-000027658|TFB1M::chr6:155635616/-:-000169078
chr20:48687304-48688633	1329	enhancer	CEBPB|LINC01272|SPATA2	1.18	1.16	1.53	1.08	0.73	1.13	0.41	0.22	0.34	0.53	-0.23	-0.24	0.58	-0.02	-0.14	0.26	-0.04	-0.22	1.31	1.1	1.69	0.84	1.21	1.24		CEBPB|LINC01272|SPATA2		CEBPB|SNAI1	CEBPB::chr20:48807119/+:-000118486|LINC01272::chr20:48884022/+:-000195389|RNF114::chr20:48552913/+:0000134391|TMEM189-UBE2V1::chr20:48770334/-:0000081701|UBE2V1::chr20:48721016/-:0000032383|UBE2V1::chr20:48728098/-:0000039465|UBE2V1::chr20:48732495/-:0000043862|UBE2V1::chr20:48725647/-:0000037014|UBE2V1::chr20:48715500/-:0000026867|UBE2V1::chr20:48732157/-:0000043524|UBE2V1::chr20:48713070/-:0000…
chr1:35913740-35914836	1096	enhancer	TFAP2E|NCDN	1.66	1.29	0.93	0.79	0.49	0.39	0.88	0.28	0.7	0.67	12.93	17.37	16.31	13.21	0.28	0.5	0.33	0.42	0.16	-0.35	1.84	1.38	1.84	1.16		TFAP2E|NCDN		TFAP2E	KIAA0319L::chr1:36023036/-:0000108200|KIAA0319L::chr1:36020119/-:0000105283|TFAP2E::chr1:36038970/+:-000124134|PSMB2::chr1:36107444/-:0000192608|PSMB2::chr1:36075008/-:0000160172|PSMB2::chr1:36096944/-:0000182108|PSMB2::chr1:36097137/-:0000182301|PSMB2::chr1:36107151/-:0000192315|PSMB2::chr1:36107444/-:0000192608|PSMB2::chr1:36075008/-:0000160172|PSMB2::chr1:36096944/-:0000182108|PSMB2::chr1:3609…
chr1:26185389-26186720	1331	promotor	AUNIP|PAQR7	-0.25	-0.28	1.01	0.98	0.97	1.84	0.76	0.49	0.78	1.74	0.21	0.37	0.22	0.5	0.4	0.5	0.32	0.78	16.6	15.29	2.57	1.85	3.08	6.52	AUNIP|PAQR7	EXTL1			PAFAH2::chr1:26317353/-:0000130633|PAFAH2::chr1:26324647/-:0000137927|STMN1::chr1:26231228/-:0000044508|STMN1::chr1:26232992/-:0000046272|STMN1::chr1:26232643/-:0000045923|STMN1::chr1:26233367/-:0000046647|EXTL1::chr1:26348270/+:-000161550|AUNIP::chr1:26185948/-:0000000000|PAQR7::chr1:26197743/-:0000011023|PAQR7::chr1:26190351/-:0000003631|SEPN1::chr1:26126666/+:0000058723|MTFR1L::chr1:26146683/+…
chr7:136640718-136642613	1895	promotor	CHRM2	0.95	1.06	-0.15	0.27	1.15	0.97	-0.16	0.2	1.41	1.02	0.63	1.28	2.3	3.94	-0.26	-0.27	0.91	1.84	0.15	0.04	-0.08	1.48	2.89	2	CHRM2	CHRM2			CHRM2::chr7:136553398/+:0000087320|CHRM2::chr7:136553983/+:0000086735|CHRM2::chr7:136554007/+:0000086711|CHRM2::chr7:136553831/+:0000086887|CHRM2::chr7:136699566/+:-000056953|CHRM2::chr7:136635749/+:0000004969|CHRM2::chr7:136553868/+:0000086850|CHRM2::chr7:136553992/+:0000086726|CHRM2::chr7:136676933/+:-000034320|CHRM2::chr7:136553398/+:0000087320|CHRM2::chr7:136553983/+:0000086735|CHRM2::chr7:13…
chr12:121652638-121653371	733	promotor	P2RX4	0.92	0.76	0.11	0.54	0	-0.09	0	-0.07	0.25	0.07	-0.1	0.34	0.44	0.27	0.13	-0.03	0.32	-0.03	0.18	-0.25	-0.32	-0.13	-0.23	-0.1	P2RX4	OASL|RNF34|C12orf43	CAMKK2		OASL::chr12:121477044/-:-000175594|RNF34::chr12:121837885/+:-000184514|RNF34::chr12:121837920/+:-000184549|RNF34::chr12:121840544/+:-000187173|CAMKK2::chr12:121712387/-:0000059016|CAMKK2::chr12:121736110/-:0000082739|CAMKK2::chr12:121734555/-:0000081184|C12orf43::chr12:121454304/-:-000198334|ANAPC5::chr12:121784807/-:0000131436|ANAPC5::chr12:121792011/-:0000138640|ANAPC5::chr12:121790264/-:000013…
chr6:10033105-10034175	1070	other		1.01	0.78	0.59	1.63	1.14	0.34	0.99	0.78	1.06	0.52	4.44	8.47	7.65	6.06	0.56	0.95	1.4	0.76	4.64	2.41	0.08	0.36	0.35	0.16
chr12:99847315-99850052	2737	enhancer	FAM71C	3.47	2.61	2.27	1.55	0.79	1.14	0.69	1.34	0.8	0.98	0.98	0.9	0.56	1.17	0.32	0.9	0.8	0.44	4.39	1.91	8.93	10.85	5.22	2.42		FAM71C			FAM71C::chr12:100041527/+:-000191475
chr19:50167514-50181520	14006	promotor	BCL2L12|PRMT1|IRF3	2.55	2.63	0.84	1.45	1.98	3.06	3.91	1.2	2.49	5.8	-0.81	-0.29	0.12	1.33	0.01	1.59	0.27	1.06	72.77	71.63	26.78	16.2	21.74	34.84	BCL2L12|PRMT1|IRF3	PTOV1|RRAS|NOSIP|ADM5|CPT1C|MED25|AP2A1|TBC1D17		IRF3	RPS11::chr19:49999621/+:0000167893|PTOV1::chr19:50354376/+:-000172856|PTOV1::chr19:50353991/+:-000172471|MED25::chr19:50321535/+:-000140015|RRAS::chr19:50143399/-:-000024115|NOSIP::chr19:50083828/-:-000083686|NOSIP::chr19:50063948/-:-000103566|NOSIP::chr19:50080133/-:-000087381|BCL2L12::chr19:50168398/+:0000000000|RPL13A::chr19:49990810/+:0000176704|RPL13A::chr19:49993731/+:0000173783|RPL13A::chr…
chr8:25311479-25317290	5811	promotor	CDCA2|KCTD9	1.25	1.95	1.79	2.91	2.06	3.2	1.93	2.16	3.72	4.95	0.82	2.85	2.91	3.05	1.05	2.27	1.42	3.09	47.66	36.73	23.57	19.75	19.68	22.09	CDCA2|KCTD9	GNRH1			CDCA2::chr8:25316512/+:0000000000|KCTD9::chr8:25315983/-:0000000000|GNRH1::chr8:25280846/-:-000030633|GNRH1::chr8:25282555/-:-000028924
chr4:6841497-6842589	1092	enhancer	MRFAP1L1|TBC1D14	1.56	1.44	0.82	0.6	0.33	0.21	0.31	0.75	0.19	0.11	-0.03	0.46	0.32	-0.01	0.41	0.83	-0.04	0.06	1.72	0.73	2.85	2.52	0.84	0.31		MRFAP1L1|TBC1D14			BLOC1S4::chr4:6717841/+:0000123656|KIAA0232::chr4:6784458/+:0000057039|KIAA0232::chr4:6806249/+:0000035248|KIAA0232::chr4:6825911/+:0000015586|KIAA0232::chr4:6784458/+:0000057039|KIAA0232::chr4:6806249/+:0000035248|KIAA0232::chr4:6825911/+:0000015586|S100P::chr4:6695565/+:0000145932|MRFAP1L1::chr4:6711605/-:-000129892|MRFAP1::chr4:6642554/+:0000198943|MRFAP1::chr4:6641817/+:0000199680|TBC1D14::ch…
chr8:109254814-109261933	7119	promotor	EIF3E	0.82	1.55	3.67	2.28	1.75	3.69	1.72	0.6	1.19	2.13	0.96	1.5	2.6	1.83	0.54	0.43	1.02	0.18	42.42	33.74	10.7	7.39	8.43	11.73	EIF3E	RSPO2|EMC2			EMC2::chr8:109455852/+:-000193919|EIF3E::chr8:109260958/-:0000000000|RSPO2::chr8:109095912/-:-000158902|RSPO2::chr8:109095034/-:-000159780|RSPO2::chr8:109095430/-:-000159384
chr1:183810447-183813163	2716	enhancer	APOBEC4	1.59	1.43	0.47	0.52	1.22	4.35	0.45	0.64	4.72	2.78	0.6	1.63	3.66	2.77	-0.05	0.83	2.48	4.78	1.81	2.14	1.23	3.62	19.15	14.72		APOBEC4			COLGALT2::chr1:183947653/-:0000134490|COLGALT2::chr1:184006903/-:0000193740|COLGALT2::chr1:183947653/-:0000134490|COLGALT2::chr1:184006903/-:0000193740|RGL1::chr1:183666537/+:0000143910|RGL1::chr1:183774214/+:0000036233|RGL1::chr1:183711260/+:0000099187|RGL1::chr1:183666537/+:0000143910|RGL1::chr1:183774214/+:0000036233|RGL1::chr1:183711260/+:0000099187|APOBEC4::chr1:183617945/-:-000192502|APOBEC…
chr4:144433851-144435708	1857	promotor	SMARCA5	-0.16	-0.77	3.17	2.27	1.86	1.93	1.85	1.26	1.61	2.34	1.05	3.84	2.12	1.56	0.75	1.01	0.71	0.94	26	21.16	14.09	8.59	8.21	12.39	SMARCA5				SMARCA5::chr4:144434615/+:0000000000|GAB1::chr4:144257982/+:0000175869
chr20:57606082-57625972	19890	promotor	SLMO2|ATP5E	10.78	7.92	13.32	11.64	6.54	6.19	8.94	5.86	7.4	5.58	9.07	14.62	9.62	6.23	3.3	8.3	4.73	3.25	69.19	60.78	49.28	55.64	40.62	31.83	SLMO2|ATP5E	CTSZ			NELFCD::chr20:57556262/+:0000049820|GNAS::chr20:57428035/+:0000178047|GNAS::chr20:57466425/+:0000139657|GNAS::chr20:57414794/+:0000191288|TUBB1::chr20:57594308/+:0000011774|CTSZ::chr20:57582308/-:-000023774|SLMO2::chr20:57617900/-:0000000000|ATP5E::chr20:57607421/-:0000000000
chr6:75380810-75382119	1309	genebody_intron	LOC101928516	1	0.36	1.4	0.51	0.55	0.68	-0.01	-0.02	0.02	0.07	0.35	0.38	0.14	0.71	0.32	0.54	0.16	0.84	1.05	0.33	0.7	1.05	0.08	0.58
chr6:18585013-18586264	1251	3 prime	RNF144B	0.19	0.5	0.04	0.14	1.01	0.31	-0.01	0.25	0.21	0.27	0	0.79	1.18	0.75	-0.3	0.59	0.42	0.79	0.1	0.18	-0.39	0.22	0.98	0.32					RNF144B::chr6:18399729/+:0000185284|RNF144B::chr6:18387580/+:0000197433
chr20:11120658-11121754	1096	other		-0.14	0.13	0.56	1	1.5	0.4	0.4	0.57	1.02	0.69	4.69	9.84	9.91	6.78	0	0.3	0.51	0.36	-0.37	-0.57	-0.27	-0.25	-0.13	-0.41
chr12:64172833-64174675	1842	promotor	TMEM5	-0.62	-0.37	1.51	0.91	0.87	1.76	1.63	0.06	0.64	1.74	0.57	0.07	-0.32	0.58	0.27	0.39	0.34	0.29	26.22	19.1	8.29	4.18	5.03	10.27	TMEM5	DPY19L2|SRGAP1|TMEM5			DPY19L2::chr12:64062353/-:-000110480|SRGAP1::chr12:64238540/+:-000063865|TMEM5::chr12:64174798/+:-000000123|TMEM5::chr12:64173582/+:0000000000|TMEM5::chr12:64195870/+:-000021195|TMEM5::chr12:64199013/+:-000024338|TMEM5::chr12:64173905/+:0000000000|TMEM5::chr12:64178749/+:-000004074
chr8:84859579-84860349	770	other		0.17	0.15	0.4	0.7	0.33	0.13	0.42	0.21	0.05	0.22	1.91	3.59	1.82	1.1	0.08	0.63	0.26	0.08	1.19	0.86	0.35	0.73	0.08	0.05
chr16:69597549-69601674	4125	promotor	NFAT5	-1	-1.19	7.23	5.46	4.68	6.9	2.7	2.78	5.64	5.95	0.5	3.77	2.8	2.62	0.32	1.47	0.87	1.71	65.52	53.28	32.11	27.96	32.7	35.85	NFAT5	NFAT5|WWP2|TERF2		NFAT5|TERF2	NFAT5::chr16:69602397/+:-000000723|NFAT5::chr16:69680419/+:-000078745|NFAT5::chr16:69680930/+:-000079256|NFAT5::chr16:69660305/+:-000058631|NFAT5::chr16:69599868/+:0000000000|NFAT5::chr16:69602397/+:-000000723|NFAT5::chr16:69680419/+:-000078745|NFAT5::chr16:69680930/+:-000079256|NFAT5::chr16:69660305/+:-000058631|NFAT5::chr16:69599868/+:0000000000|WWP2::chr16:69796186/+:-000194512|WWP2::chr16:697…
chr3:131448901-131449920	1019	genebody_intron	CPNE4	0.15	-0.22	0.84	0.36	0.38	0.05	0.62	0.19	0.24	0.24	6.36	4.7	4.23	2.82	0.54	0.18	0.17	0	-0.16	-0.13	0.36	-0.15	0.02	-0.09					CPNE4::chr3:131624287/-:0000174367
chr2:233516365-233517703	1338	enhancer	GIGYF2|TIGD1|ECEL1	1	0.1	2.23	0.08	-0.01	0.04	1.23	0.21	0	0.26	2.37	0.65	0.41	0.59	0.55	0.32	0.15	0.09	0.64	0.06	3.77	0.24	-0.27	-0.09		GIGYF2|TIGD1|ECEL1			KCNJ13::chr2:233641274/-:0000123571|KCNJ13::chr2:233635854/-:0000118151|KCNJ13::chr2:233636087/-:0000118384|EFHD1::chr2:233498206/+:0000018159|EFHD1::chr2:233470766/+:0000045599|GIGYF2::chr2:233599126/+:-000081423|GIGYF2::chr2:233599864/+:-000082161|GIGYF2::chr2:233568133/+:-000050430|GIGYF2::chr2:233565294/+:-000047591|GIGYF2::chr2:233562014/+:-000044311|PRSS56::chr2:233385172/+:0000131193|TIGD1…
chrX:119602623-119603412	789	promotor	LAMP2	-0.04	-0.17	0.44	0.45	0.39	0.2	0.21	0.11	0.03	0.15	0.23	0.86	0.41	0.28	0.19	0.35	0.12	0.14	7.52	6.02	3.57	1.63	1.3	2.19	LAMP2	MCTS1|TMEM255A			MCTS1::chrX:119738551/+:-000135139|MCTS1::chrX:119737743/+:-000134331|ATP1B4::chrX:119495939/+:0000106684|C1GALT1C1::chrX:119761025/-:0000157613|C1GALT1C1::chrX:119764004/-:0000160592|C1GALT1C1::chrX:119761281/-:0000157869|TMEM255A::chrX:119445390/-:-000157233|CUL4B::chrX:119708484/-:0000105072|CUL4B::chrX:119694816/-:0000091404|CUL4B::chrX:119709683/-:0000106271|CUL4B::chrX:119708484/-:000010507…
chr7:114727070-114738215	11145	genebody_intron	LINC01393	1.34	3.94	2.5	3.62	1.59	2.15	1.08	2.83	3.26	0.73	4.36	12.09	8.6	4.58	0.63	3.34	3.03	2.66	-1.07	0.64	1.88	14.88	17.88	7.51					MDFIC::chr7:114562208/+:0000164862|MDFIC::chr7:114562981/+:0000164089
chr6:15872209-15873260	1051	other		0.86	0.66	0.8	0.27	0.18	0.28	0.41	0.08	-0.06	0.16	1.06	0.79	0.81	0.99	0.28	0.2	0.03	0.26	0.54	0.34	0.33	0.73	0.21	0.05
chr4:140148632-140149501	869	enhancer	ELF2|NAA15	0.25	0.26	0.73	0.47	0.16	0.43	0.36	0.15	0.09	0.05	0.06	0.39	0.13	0.19	0.06	0.47	0.28	-0.02	-0.27	-0.16	0.39	0.19	0.1	0.06		ELF2|NAA15		ELF2	NDUFC1::chr4:140217109/-:0000067608|NDUFC1::chr4:140218596/-:0000069095|NDUFC1::chr4:140222387/-:0000072886|NDUFC1::chr4:140222363/-:0000072862|NDUFC1::chr4:140223704/-:0000074203|NDUFC1::chr4:140217113/-:0000067612|NDUFC1::chr4:140217520/-:0000068019|ELF2::chr4:140005567/-:-000143065|ELF2::chr4:140060629/-:-000088003|ELF2::chr4:140059020/-:-000089612|MGARP::chr4:140201491/-:0000051990|NAA15::chr…
chr1:246116368-246118213	1845	genebody_intron	SMYD3	-0.38	-0.22	1.62	-0.15	0.11	0.19	0.39	0.13	0.21	0.4	0.78	0.6	0.33	0.61	0.27	0.59	0.22	0.44	2.51	1.61	3.52	3.57	1.69	2.27
chr19:35645219-35646712	1493	promotor	FXYD5	0.46	0.15	0.67	1.27	0.85	1.2	1.01	0.73	0.79	1.54	1.07	1.16	0.86	0.83	0.36	0.59	0.48	0.39	26.87	25.98	7.46	6.5	8.76	10.03	FXYD5	HAMP|CD22|FFAR1|LGI4|ZNF792|LSR|MAG|USF2		ZNF792|USF2	FXYD7::chr19:35634153/+:0000011066|FXYD5::chr19:35645624/+:0000000000|FXYD5::chr19:35645671/+:0000000000|FXYD5::chr19:35645844/+:0000000000|FXYD3::chr19:35607167/+:0000038052|FXYD3::chr19:35608160/+:0000037059|FXYD3::chr19:35606731/+:0000038488|FXYD3::chr19:35610266/+:0000034953|FXYD3::chr19:35610071/+:0000035148|HAMP::chr19:35773409/+:-000126697|FXYD1::chr19:35630537/+:0000014682|FXYD1::chr19:35…
chr8:79343811-79344800	989	enhancer	PKIA	-0.25	-0.07	0.57	0	0.29	0.23	0.13	0.56	0.08	-0.1	0.13	0.24	0.2	0.19	0.26	0.32	0.15	-0.01	-0.42	-0.33	0.21	0.31	0.06	-0.12		PKIA			PKIA::chr8:79428335/+:-000083535|PKIA::chr8:79510592/+:-000165792|PKIA::chr8:79485045/+:-000140245|PKIA::chr8:79428335/+:-000083535|PKIA::chr8:79510592/+:-000165792|PKIA::chr8:79485045/+:-000140245
chr5:177739196-177740600	1404	enhancer	PHYKPL|NHP2	0.95	0.58	1.54	0.42	0.7	0.96	0.8	0.83	1.22	1.05	0.98	0.99	0.68	0.77	0.47	0.58	0.47	0.36	2.31	0.7	3.77	5.52	3.79	2.47		PHYKPL|NHP2			HNRNPAB::chr5:177631815/+:0000107381|HNRNPAB::chr5:177631507/+:0000107689|PHYKPL::chr5:177658523/-:-000080673|PHYKPL::chr5:177659822/-:-000079374|NHP2::chr5:177580960/-:-000158236|RMND5B::chr5:177557961/+:0000181235|RMND5B::chr5:177558237/+:0000180959|RMND5B::chr5:177565108/+:0000174088|RMND5B::chr5:177562173/+:0000177023|N4BP3::chr5:177546554/+:0000192642|N4BP3::chr5:177540555/+:0000198641
chr16:55577191-55590106	12915	enhancer	CAPNS2|SLC6A2	-0.18	0.08	1.54	1.21	0.63	-0.42	1.44	0.28	1.8	0.02	5	6.15	4.64	1.03	0.75	2.09	1.35	0.64	-2.67	-1.81	0.89	5.52	-0.06	-0.95		CAPNS2|SLC6A2			MMP2::chr16:55513080/+:0000064111|MMP2::chr16:55514444/+:0000062747|MMP2::chr16:55512741/+:0000064450|MMP2::chr16:55513909/+:0000063282|MMP2::chr16:55516820/+:0000060371|MMP2::chr16:55515468/+:0000061723|SLC6A2::chr16:55690555/+:-000100449|SLC6A2::chr16:55705582/+:-000115476|SLC6A2::chr16:55689541/+:-000099435|SLC6A2::chr16:55690351/+:-000100245|SLC6A2::chr16:55690555/+:-000100449|SLC6A2::chr16:5…
chr2:222505528-222507159	1631	enhancer	EPHA4	0.02	0.88	1.12	0.76	0.75	1.93	0.14	0.09	0.45	0.59	4.45	6.52	5.4	6.8	0.45	0.57	0.42	1.39	0	0.17	1.27	2.24	3.56	3.65		EPHA4	EPHA4		EPHA4::chr2:222437000/-:-000068528|EPHA4::chr2:222437077/-:-000068451|EPHA4::chr2:222438921/-:-000066607
chr3:186887425-186888732	1307	enhancer	RTP4|RTP1|RPL39L	1.69	2.76	1.35	0.72	0.27	0.57	0.86	0.06	0.39	0.2	2.12	1.56	1.14	1.74	0.77	0.45	0.12	0.7	0.22	0.31	0.76	0.44	0.25	0.96		RTP4|RTP1|RPL39L			RTP4::chr3:187086167/+:-000197435|ST6GAL1::chr3:186756529/+:0000130896|ST6GAL1::chr3:186769036/+:0000118389|ST6GAL1::chr3:186760441/+:0000126984|ST6GAL1::chr3:186739664/+:0000147761|ST6GAL1::chr3:186756529/+:0000130896|ST6GAL1::chr3:186769036/+:0000118389|ST6GAL1::chr3:186760441/+:0000126984|ST6GAL1::chr3:186739664/+:0000147761|RPL39L::chr3:186839115/-:-000048310|RPL39L::chr3:186845849/-:-0000415…
chr5:83220689-83221779	1090	3 prime	EDIL3	0.36	0.26	1.01	0.51	0.32	0.95	0.75	0.53	0.26	0.58	0.6	0.28	0.15	0.4	0.4	0.29	0.43	1.32	0.78	0.65	2.41	1.47	1.51	1.68
chr3:79921232-79922285	1053	enhancer	ROBO1	0.03	0.15	1	0.69	0.34	0.43	0.22	0.58	0.68	0.6	2.48	2.7	1.72	1.59	0.4	0.71	0.52	1.15	-0.05	-0.09	2.14	4.21	1.76	1.52		ROBO1			ROBO1::chr3:79817058/-:-000104174
chr10:14098554-14117559	19005	genebody_exon	LOC101928453	6.8	1.42	11.92	6.2	2.95	5.34	6	4.25	6.21	4.35	24.45	34.06	27.42	26.62	2.8	2.63	2.5	3.99	0.76	-0.65	9.12	6.82	10.49	5.78
chr3:58079235-58080270	1035	enhancer	ABHD6	1.04	0.59	0.81	1.44	0.74	0.71	1.41	0.75	1.74	0.86	3.22	6.08	4.64	2.58	0.89	1.4	0.75	0.54	-0.06	0.1	1.81	3.71	1.49	0.67		ABHD6			SLMAP::chr3:57882237/+:0000196998|SLMAP::chr3:57882599/+:0000196636|FLNB::chr3:57994126/+:0000085109|DNASE1L3::chr3:58196729/-:0000116459|ABHD6::chr3:58223258/+:-000142988|ABHD6::chr3:58242288/+:-000162018
chr8:42052344-42073252	20908	promotor	PLAT	23.65	28.46	7.71	9.82	13.88	8.63	5.54	6.77	17.95	13.08	9.96	23.51	19.56	15.22	1.32	7	6.66	5	19.08	27.1	47.07	72.03	69.71	50.42	PLAT	IKBKB|POLB|VDAC3|KAT6A	IKBKB		DKK4::chr8:42234673/-:0000161421|AP3M2::chr8:42010463/+:0000041881|AP3M2::chr8:42011995/+:0000040349|AP3M2::chr8:42012133/+:0000040211|PLAT::chr8:42065193/-:0000000000|PLAT::chr8:42050728/-:-000001616|IKBKB::chr8:42128819/+:-000055567|IKBKB::chr8:42129600/+:-000056348|POLB::chr8:42195972/+:-000122720|VDAC3::chr8:42251727/+:-000178475|VDAC3::chr8:42249278/+:-000176026|VDAC3::chr8:42251362/+:-00017…
chr18:26733288-26769464	36176	other		-1.7	3.55	11.24	13.22	14.35	45.99	0.73	2.53	17.76	19.01	10.26	25.69	27.05	16.69	0.15	12.47	16.34	18.35	-2.56	6.97	33.17	109.07	162.05	122.19
chr10:62425531-62426833	1302	enhancer	CDK1|ANK3	-0.22	-0.45	0.87	1.68	0.96	0.64	0.2	-0.1	0.87	0.59	8.33	16.64	13.86	11.96	0.21	0.7	1.14	0.9	-0.8	-0.65	-0.66	-0.23	0.54	0.39		CDK1|ANK3	CDK1		CDK1::chr10:62539898/+:-000113065|CDK1::chr10:62538088/+:-000111255|CDK1::chr10:62538211/+:-000111378|ANK3::chr10:62493283/-:0000066450|ANK3::chr10:62332713/-:-000092818|ANK3::chr10:62493283/-:0000066450|ANK3::chr10:62332713/-:-000092818
chr8:67201856-67203582	1726	enhancer	RRS1|CRH|ADHFE1	1.1	1.47	-0.28	0.47	0.8	2.25	-0.19	0.44	1.05	1.3	0.28	-0.2	0.58	0.65	-0.07	0.13	0.96	2.11	-0.34	0.32	0.35	0.19	8.11	8.42		RRS1|CRH|ADHFE1			RRS1::chr8:67341262/+:-000137680|TRIM55::chr8:67039277/+:0000162579|CRH::chr8:67089725/-:-000112131|CRH::chr8:67090845/-:-000111011|ADHFE1::chr8:67344717/+:-000141135
chr6:65381405-65395035	13630	genebody_intron	EYS	-1.28	-0.08	7.42	0.68	2	20.55	-1.43	-0.59	1.18	1.94	3.32	7.98	6.45	4.76	0.03	0.22	2.36	3.82	-4.78	-4	18.54	22.52	35.28	36.88
chr20:34662672-34691701	29029	promotor	EPB41L1	17.31	13.06	8.67	8.5	5.18	2.17	5.69	7.1	4.34	3.22	4.67	12.08	6.43	2.37	3.37	8.95	3.9	3.28	25.35	14.47	25.54	44.78	32.07	12.7	EPB41L1	SCAND1|EPB41L1|AAR2			EPB41L1::chr20:34680631/+:0000000000|EPB41L1::chr20:34701614/+:-000009913|EPB41L1::chr20:34700347/+:-000008646|EPB41L1::chr20:34679425/+:0000000000|EPB41L1::chr20:34761685/+:-000069984|EPB41L1::chr20:34763472/+:-000071771|EPB41L1::chr20:34742661/+:-000050960|EPB41L1::chr20:34713344/+:-000021643|EPB41L1::chr20:34680631/+:0000000000|EPB41L1::chr20:34701614/+:-000009913|EPB41L1::chr20:34700347/+:-00…
chr6:124615626-124616141	515	enhancer	NKAIN2	-0.14	0.31	0.03	0.21	0.46	0.17	0	-0.1	0.18	0.18	0.12	0.58	0.54	0.34	-0.09	0.27	0.27	0.44	-0.21	-0.12	-0.17	-0.1	-0.08	-0.11		NKAIN2			NKAIN2::chr6:124759048/+:-000142907|NKAIN2::chr6:124443022/+:0000172604|NKAIN2::chr6:124676412/+:-000060271|NKAIN2::chr6:124604150/+:0000011476|NKAIN2::chr6:124759048/+:-000142907|NKAIN2::chr6:124443022/+:0000172604|NKAIN2::chr6:124676412/+:-000060271|NKAIN2::chr6:124604150/+:0000011476|NKAIN2::chr6:124759048/+:-000142907|NKAIN2::chr6:124443022/+:0000172604|NKAIN2::chr6:124676412/+:-000060271|NKA…
chr4:180031322-180041868	10546	other		0.84	4.77	2.5	1.36	2.64	6.57	-0.84	-0.59	2.39	2.63	6.59	16.29	19.42	18.42	0.41	0.65	2.71	5.02	-4.56	-3.85	5.57	4.18	17.96	19.33
chr20:30399829-30431473	31644	promotor	MYLK2|FOXS1	35.33	18.36	8.77	5.78	2.33	2.76	6.63	3.8	2.3	3.41	4.5	3.19	0.07	0.69	4.29	5.62	2.67	2.37	1.73	-0.1	38.16	45.73	17.97	15.69	MYLK2|FOXS1	BCL2L1|CCM2L|TTLL9|XKR7	MYLK2	FOXS1	BCL2L1::chr20:30310150/-:-000089679|BCL2L1::chr20:30310655/-:-000089174|TPX2::chr20:30326903/+:0000072926|TPX2::chr20:30330343/+:0000069486|TPX2::chr20:30345209/+:0000054620|CCM2L::chr20:30598244/+:-000166771|TTLL9::chr20:30458924/+:-000027451|TTLL9::chr20:30458504/+:-000027031|MYLK2::chr20:30407335/+:0000000000|MYLK2::chr20:30407177/+:0000000000|XKR7::chr20:30555804/+:-000124331|FOXS1::chr20:304…
chr3:180465509-180481403	15894	enhancer	CCDC39|FXR1	1.13	-0.45	1.77	3.23	0.2	0.19	0.18	1.83	0.36	0.15	6.19	9.68	4.05	4.8	0.96	2.67	0.23	-0.71	-2.49	-3.11	1.65	9.7	-0.74	-1.17		CCDC39|FXR1			FXR1::chr3:180665652/+:-000184249|FXR1::chr3:180652925/+:-000171522|FXR1::chr3:180630233/+:-000148830|FXR1::chr3:180651121/+:-000169718|FXR1::chr3:180632439/+:-000151036|CCDC39::chr3:180397282/-:-000068227|TTC14::chr3:180319917/+:0000145592
chr13:48611145-48612906	1761	promotor	NUDT15	2.25	0.57	2.39	1.63	1.54	2.6	1.82	1.18	0.94	3.34	0.62	0.88	0.09	0.99	0.2	0.78	0.13	0.75	23.63	21.14	9.24	4.84	5.78	11.02	NUDT15	ITM2B|SUCLA2			ITM2B::chr13:48807273/+:-000194367|SUCLA2::chr13:48575461/-:-000035684|MED4::chr13:48664553/-:0000051647|MED4::chr13:48669276/-:0000056370|NUDT15::chr13:48611702/+:0000000000
chr4:160123836-160124816	980	enhancer	RAPGEF2|C4orf45	-0.35	-0.23	0.92	0.48	0.19	0.47	0.27	0.4	0.49	0.22	0.08	-0.02	0.23	0.25	0.17	-0.09	0.42	0.02	-0.39	-0.19	-0.05	0.18	0.19	-0.11		RAPGEF2|C4orf45			RAPGEF2::chr4:160188997/+:-000064181|C4orf45::chr4:159956332/-:-000167504
chr6:68338164-68341127	2963	other		0.06	1.01	0.22	0.89	1.98	7.79	-0.35	-0.06	4.38	3.28	1.96	6.83	12.71	7.87	-0.49	0.81	2.49	5.33	-0.41	-0.61	-0.38	4.01	37.1	18.75
chr2:144022036-144023313	1277	genebody_intron	ARHGAP15	0.59	1.16	1.41	1.4	0	0.19	0.89	1.14	0.46	0.5	2.95	4.76	2.08	1.68	0.62	0.84	0.19	0.37	-0.02	-0.22	1.21	1.67	0.29	0.01					ARHGAP15::chr2:143913045/+:0000108991|ARHGAP15::chr2:143886898/+:0000135138|ARHGAP15::chr2:143913045/+:0000108991|ARHGAP15::chr2:143886898/+:0000135138
chr14:105766432-105782052	15620	promotor	BRF1|PACS2	3.56	0.68	3.57	2.45	1.63	1.88	3.26	1.84	1.95	4.64	-1.2	-1.35	-0.4	-0.8	0.05	0.29	0.29	0.46	32.79	25.85	14.64	9.46	9.25	14.33	BRF1|PACS2	TEX22|C14orf80|NUDT14|JAG2|BRF1|CRIP1|MTA1|PACS2|CRIP2		MTA1	BTBD6::chr14:105714878/+:0000051554|BTBD6::chr14:105715118/+:0000051314|TEX22::chr14:105864919/+:-000082867|TEX22::chr14:105865638/+:-000083586|C14orf80::chr14:105956191/+:-000174139|C14orf80::chr14:105957585/+:-000175533|C14orf80::chr14:105956519/+:-000174467|C14orf80::chr14:105957317/+:-000175265|NUDT14::chr14:105647659/-:-000118773|JAG2::chr14:105635160/-:-000131272|BRF1::chr14:105695249/-:-00…
chr6:21587465-21600525	13060	promotor	SOX4	0.53	0.3	17.93	15.91	9.23	10.6	7.73	8.55	9.61	7.82	6.21	8.69	5.06	3.27	2.44	4.68	3.21	2.29	143.92	96.12	60.75	52.97	47.69	44.34	SOX4			SOX4	SOX4::chr6:21593971/+:0000000000
chr22:36138153-36139263	1110	enhancer	MB	1.22	1.31	0.21	0.74	0.92	0.44	0.26	0.34	0.88	0.65	0.39	0.74	1.13	0.42	0	0.33	0.28	0.49	0.04	0.27	1.59	2.39	2.62	1.66		MB			APOL6::chr22:36052425/+:0000085728|APOL6::chr22:36044423/+:0000093730|RBFOX2::chr22:36236629/-:0000097366|RASD2::chr22:35942847/+:0000195306|MB::chr22:36013311/-:-000124842|MB::chr22:36013383/-:-000124770|MB::chr22:36019400/-:-000118753|MB::chr22:36013554/-:-000124599
chr10:61147504-61148318	814	enhancer	FAM13C	0.51	0.5	0.61	0.22	0.34	0.21	0.35	0.13	0.12	0.28	0.32	0.13	0.17	-0.01	0.28	0	0.12	0.09	0.32	0.14	0.57	0.05	-0.06	0.02		FAM13C			FAM13C::chr10:61122351/-:-000025153|FAM13C::chr10:61115702/-:-000031802|FAM13C::chr10:61122196/-:-000025308|FAM13C::chr10:61120869/-:-000026635|FAM13C::chr10:61122660/-:-000024844|FAM13C::chr10:61112233/-:-000035271
chr19:46133585-46146971	13386	promotor	EML2|C19orf83	24.66	16.53	6.27	2.91	1.74	3.58	5.22	2.52	4.31	7.6	4.74	4.04	2.15	4.32	1.69	1.97	0.6	2.72	23.39	18.49	27.21	11.94	13.88	20.56	EML2|C19orf83	GPR4|RTN2|OPA3|QPCTL|GIPR	DMPK	SIX5|FOSB	FBXO46::chr19:46234150/-:0000087179|FBXO46::chr19:46216830/-:0000069859|SIX5::chr19:46272496/-:0000125525|GPR4::chr19:46095954/-:-000037631|GPR4::chr19:46105465/-:-000028120|GPR4::chr19:46095954/-:-000037631|GPR4::chr19:46105465/-:-000028120|EML2::chr19:46148774/-:0000001803|EML2::chr19:46142674/-:0000000000|EML2::chr19:46146984/-:0000000013|RSPH6A::chr19:46318604/-:0000171633|FOSB::chr19:4597125…
chr3:99250374-99265876	15502	enhancer	COL8A1	2.78	9.26	11.21	3.06	7.64	24.68	3.23	-0.17	21.82	19.84	12.57	21.25	35.07	27.88	-0.21	4.3	10.85	14.97	-5.42	-3.8	9.86	3.97	70.01	49.77		COL8A1			COL8A1::chr3:99463740/+:-000197864|COL8A1::chr3:99394503/+:-000128627|COL8A1::chr3:99357439/+:-000091563|COL8A1::chr3:99463740/+:-000197864|COL8A1::chr3:99394503/+:-000128627|COL8A1::chr3:99357439/+:-000091563
chr6:136242734-136244277	1543	genebody_intron	PDE7B	1.01	1.61	0.47	1.37	0.87	0.44	-0.05	0.08	0.52	0.31	1.3	2.97	2.48	2.48	0.5	0.59	0.4	0.03	-0.12	-0.13	0.44	1.57	2.32	0.63					PDE7B::chr6:136172833/+:0000069901
chr1:33472439-33473478	1039	enhancer	FNDC5|AZIN2|YARS|TMEM54|RNF19B	1.51	0.74	0.68	0.86	0.58	0.34	0.65	0.51	0.65	0.71	1.4	1.8	1.34	1.11	0.49	0.16	0.23	0.6	0.02	0	1.02	0.39	0.27	0.28		FNDC5|AZIN2|YARS|TMEM54|RNF19B	AK2		AK2::chr1:33502511/-:0000029033|AZIN2::chr1:33547201/+:-000073723|AZIN2::chr1:33557650/+:-000084172|AZIN2::chr1:33546991/+:-000073513|AZIN2::chr1:33549554/+:-000076076|AZIN2::chr1:33547778/+:-000074300|AZIN2::chr1:33546988/+:-000073510|AZIN2::chr1:33546713/+:-000073235|AZIN2::chr1:33546729/+:-000073251|YARS::chr1:33283632/-:-000188807|HPCA::chr1:33352097/+:0000120342|HPCA::chr1:33354478/+:0000117…
chr11:6990583-6991962	1379	enhancer	NLRP14|RBMXL2|OR6A2	-0.3	-0.23	1.37	0.02	-0.16	0.03	0.26	-0.11	-0.19	-0.42	0.38	0.26	-0.31	-0.18	0.42	0.16	-0.14	0.2	-0.53	-0.27	1.32	-0.12	-0.11	-0.49		NLRP14|RBMXL2|OR6A2		ZNF215|ZNF214	ZNF215::chr11:6947653/+:0000042930|ZNF215::chr11:6948892/+:0000041691|ZNF215::chr11:6953324/+:0000037259|ZNF214::chr11:7041585/-:0000049623|ZNF214::chr11:7024085/-:0000032123|OR10A4::chr11:6897855/+:0000092728|NLRP14::chr11:7059796/+:-000067834|NLRP14::chr11:7041699/+:-000049737|RBMXL2::chr11:7110164/+:-000118202|OR6A2::chr11:6817138/-:-000173445|OR2AG1::chr11:6806247/+:0000184336
chr6:49293481-49294777	1296	enhancer	GLYATL3|CENPQ	0.02	0.79	-0.05	-0.05	1.27	1.08	0.18	-0.07	1.94	1.15	2.11	3.48	7.53	5.38	-0.16	0.15	1.33	1.6	-0.68	-0.21	-0.04	-0.19	10.48	2.73		GLYATL3|CENPQ			GLYATL3::chr6:49467670/+:-000172893|GLYATL3::chr6:49479675/+:-000184898|CENPQ::chr6:49431095/+:-000136318|CENPQ::chr6:49437871/+:-000143094|MUT::chr6:49431040/-:0000136263|MUT::chr6:49427217/-:0000132440
chr2:26204909-26241878	36969	promotor	KIF3C	19.26	20.1	4.49	5.38	4.44	3.47	4.59	6.16	5.97	6.96	16.62	30.02	26.06	20.79	1.17	2.44	2.78	2.47	8.19	4.52	17.87	25.89	24.67	12.22	KIF3C	RAB10|GAREML|ASXL2			RAB10::chr2:26256728/+:-000014850|GAREML::chr2:26395959/+:-000154081|GAREML::chr2:26403584/+:-000161706|GAREML::chr2:26395959/+:-000154081|GAREML::chr2:26403584/+:-000161706|ASXL2::chr2:26101311/-:-000103598|KIF3C::chr2:26205442/-:0000000000
chr10:60143970-60145970	2000	promotor	TFAM	0.26	-0.26	2.5	1.94	1.81	2.48	1.61	1.35	1.49	2.02	0.66	0.88	0.49	0.62	0.55	0.75	0.73	0.73	33.32	27.13	9.77	6.72	6.89	11.25	TFAM	IPMK	IPMK	TFAM	IPMK::chr10:60027693/-:-000116277|CISD1::chr10:60028861/+:0000115109|TFAM::chr10:60144902/+:0000000000|UBE2D1::chr10:60094738/+:0000049232|UBE2D1::chr10:60121097/+:0000022873|UBE2D1::chr10:60094738/+:0000049232|UBE2D1::chr10:60121097/+:0000022873
chr7:1199329-1200960	1631	promotor	ZFAND2A	0.18	0.55	3.06	2.06	1.44	2.78	2.27	1.33	2.31	2.61	0.16	0.28	0.12	0.57	0.57	0.84	0.54	0.7	30.06	22.4	14.06	11.64	12.22	14.67	ZFAND2A	COX19|C7orf50			GPR146::chr7:1094910/+:0000104419|GPR146::chr7:1097127/+:0000102202|GPR146::chr7:1084208/+:0000115121|GPR146::chr7:1095739/+:0000103590|GPER1::chr7:1131042/+:0000068287|GPER1::chr7:1127722/+:0000071607|GPER1::chr7:1126442/+:0000072887|GPER1::chr7:1127833/+:0000071496|COX19::chr7:1015234/-:-000184095|CYP2W1::chr7:1022834/+:0000176495|C7orf50::chr7:1167021/-:-000032308|C7orf50::chr7:1177892/-:-0000…
chr10:6186291-6206482	20191	promotor	PFKFB3	5.78	3.96	2.94	2.54	2.05	2.18	2.61	2.54	2.65	4.09	-0.53	-0.97	-0.65	0.16	-0.38	0.19	-0.52	0.7	41.32	37.52	17.33	12.69	16.89	20.08	PFKFB3	IL2RA|PFKFB3|IL15RA			IL2RA::chr10:6104332/-:-000081959|PFKFB3::chr10:6186842/+:0000000000|PFKFB3::chr10:6188278/+:0000000000|PFKFB3::chr10:6244839/+:-000038357|PFKFB3::chr10:6186842/+:0000000000|PFKFB3::chr10:6188278/+:0000000000|PFKFB3::chr10:6244839/+:-000038357|IL15RA::chr10:6020149/-:-000166142|IL15RA::chr10:6019573/-:-000166718|IL15RA::chr10:6008301/-:-000177990|RBM17::chr10:6130948/+:0000055343|RBM17::chr10:613…
chr14:54863258-54864320	1062	promotor	CDKN3	0.08	0.3	0.26	0.23	0.29	0.79	0.73	0.27	0.32	0.92	0.05	-0.02	-0.24	0.2	0.23	0.2	0.25	0.28	9.48	10.13	0.42	0.07	1.24	4.47	CDKN3	SAMD4A|CGRRF1			CDKN3::chr14:54863672/+:0000000000|CNIH1::chr14:54908147/-:0000043827|GMFB::chr14:54955743/-:0000091423|SAMD4A::chr14:55034329/+:-000170009|CGRRF1::chr14:54976586/+:-000112266
chr6:28602068-28626845	24777	enhancer	ZBED9|ZSCAN23|GPX6	0.61	3	6.44	5.79	4.18	6.27	0.44	1.69	3.99	3.56	3.22	8.26	7.3	10.3	1.71	2.05	0.1	2.54	75.7	60.08	21.6	24.81	20.74	25.09		ZBED9|ZSCAN23|GPX6		ZSCAN23	ZBED9::chr6:28555111/-:-000046957|ZSCAN23::chr6:28404119/-:-000197949|ZSCAN23::chr6:28411278/-:-000190790|GPX5::chr6:28493788/+:0000108280|GPX6::chr6:28483569/-:-000118499
chr13:70430143-70431924	1781	genebody_intron	KLHL1	0.5	0.68	2.37	1.45	0.48	0.27	0.72	0.77	0.78	0.35	1.96	2.56	0.91	0.62	0.69	1.34	0.25	0.45	-0.15	-0.32	4.75	6.79	0.83	0.49
chr1:113408435-113409558	1123	enhancer	RHOC|PPM1J	3.1	4.83	0.96	0.21	0.21	1.05	0.23	0.3	0.96	0.95	-0.06	0.35	0.41	0.09	0.3	0.53	0.38	0.77	-0.42	-0.17	5.25	8.3	6.25	4.73		RHOC|PPM1J			RHOC::chr1:113250024/-:-000158411|RHOC::chr1:113247789/-:-000160646|RHOC::chr1:113249677/-:-000158758|RHOC::chr1:113246427/-:-000162008|SLC16A1::chr1:113498974/-:0000089416|SLC16A1::chr1:113498684/-:0000089126|SLC16A1::chr1:113471973/-:0000062415|MOV10::chr1:113229587/+:0000178848|MOV10::chr1:113217453/+:0000190982|MOV10::chr1:113217094/+:0000191341|MOV10::chr1:113230949/+:0000177486|MOV10::chr1:…
chr16:3988789-4031344	42555	enhancer	CREBBP	41.66	26.86	14.59	11.94	3.21	3.73	14.63	9.21	8.41	9.92	7.9	11.67	7.17	6.1	5.32	7.59	4.42	4.78	5.63	5.41	51.4	49.57	25.24	13.19		CREBBP			ADCY9::chr16:4165485/-:0000134141|ADCY9::chr16:4166185/-:0000134841|CREBBP::chr16:3930120/-:-000058669
chr7:27778980-27780732	1752	promotor	TAX1BP1	-0.59	-0.98	1.45	1.37	1.16	1.07	1.64	1.18	0.81	1.02	0.87	2.12	1.42	1.61	0.27	0.27	0.02	0.14	29.13	24.56	7.23	4.38	5.41	5.03	TAX1BP1	TAX1BP1|HIBADH			HIBADH::chr7:27702619/-:-000076361|TAX1BP1::chr7:27809294/+:-000028562|TAX1BP1::chr7:27778991/+:0000000000|TAX1BP1::chr7:27788136/+:-000007404|TAX1BP1::chr7:27797649/+:-000016917|TAX1BP1::chr7:27779713/+:0000000000|TAX1BP1::chr7:27809294/+:-000028562|TAX1BP1::chr7:27778991/+:0000000000|TAX1BP1::chr7:27788136/+:-000007404|TAX1BP1::chr7:27797649/+:-000016917|TAX1BP1::chr7:27779713/+:0000000000
chr5:130498797-130507470	8673	promotor	LYRM7|HINT1	-0.54	-0.26	8.4	5.19	3.4	5.57	3.23	3.53	3.37	4.56	6.1	8.75	6.31	6.64	1.04	1.57	1.83	2.44	63.98	62.48	30.05	27.43	28.25	30.96	LYRM7|HINT1	CDC42SE2			LYRM7::chr5:130506606/+:0000000000|CDC42SE2::chr5:130599701/+:-000092231|CDC42SE2::chr5:130694901/+:-000187431|CDC42SE2::chr5:130651668/+:-000144198|CDC42SE2::chr5:130599701/+:-000092231|CDC42SE2::chr5:130694901/+:-000187431|CDC42SE2::chr5:130651668/+:-000144198|HINT1::chr5:130501040/-:0000000000
chr9:97410253-97412507	2254	enhancer	C9orf3|FBP1|FBP2	4.61	3.32	3.25	3.04	1.7	1.05	1.4	1.8	2.47	2.34	1.28	2.59	1.92	1.1	1.17	2.68	2.35	1.62	0.25	0.98	14.13	28.53	24.34	7.72		C9orf3|FBP1|FBP2			C9orf3::chr9:97521930/+:-000109423|C9orf3::chr9:97488950/+:-000076443|C9orf3::chr9:97521930/+:-000109423|C9orf3::chr9:97488950/+:-000076443|FBP1::chr9:97401922/-:-000008331|FBP1::chr9:97402530/-:-000007723|FBP1::chr9:97401615/-:-000008638|FBP2::chr9:97356113/-:-000054140
chrX:107504595-107505807	1212	enhancer	COL4A5|PSMD10	0.37	0.02	0.98	1.23	0.59	1.05	0.04	0.49	1.36	1.5	3.92	6.3	8.84	7.08	0.09	0.87	0.62	1.57	-0.09	-0.15	-0.31	-0.01	0.16	-0.01		COL4A5|PSMD10			COL4A6::chrX:107682726/-:0000176919|COL4A6::chrX:107681659/-:0000175852|ATG4A::chrX:107334898/+:0000169697|COL4A5::chrX:107683073/+:-000177266|PSMD10::chrX:107334873/-:-000169722
chr4:64386355-64394989	8634	other		-1.87	-2.14	6.78	1.26	-1.03	-1.18	0.84	0.8	-0.41	-1.07	8.7	12.91	10.37	5.04	1.3	1.08	-0.42	-0.52	-2.28	-3.37	6.83	6.16	0.21	0.55
chr7:111442440-111444667	2227	genebody_intron	DOCK4	1.16	1.18	2.66	1.06	0.36	0.28	1.11	1.03	0.75	0.48	0.52	1.32	-0.08	-0.03	0.64	1.6	0.65	0.46	0.44	0.31	10.74	20.33	2.34	0.7
chr6:154899887-154901276	1389	enhancer	SCAF8|CNKSR3	0.41	-0.2	1.03	0.09	-0.08	-0.14	-0.19	-0.23	-0.35	-0.54	2.3	0.65	0.46	0.28	0.33	0.2	0.05	-0.53	0.58	-0.15	0.71	-0.34	-0.72	-0.48		SCAF8|CNKSR3			SCAF8::chr6:155054928/+:-000153652|SCAF8::chr6:155054511/+:-000153235|CNKSR3::chr6:154831752/-:-000068135
chr8:29492034-29538970	46936	other		15.72	22.31	4.86	4.62	11.59	16.58	3.29	4.98	12.35	11.5	10.42	16.05	29.8	29.63	0.28	4.56	10.35	15.08	-6.35	2.34	5.82	5.76	60.46	46.5
chr1:103622170-103623254	1084	enhancer	COL11A1	0.43	0.08	1.29	0.23	0.11	0.23	0.2	0.22	0.08	0.37	0.34	0.14	0.09	0.32	0.7	0.26	0.26	0.35	0.45	0.09	0.76	0.2	-0.11	0.09		COL11A1			COL11A1::chr1:103574051/-:-000048119
chr4:182873355-182879012	5657	other		3.24	1.44	2.07	3.46	1.13	0.89	2.49	1.26	1.38	1.17	3.93	4.67	2.69	1.59	1.44	1.19	1.21	1.45	-1.12	-1.3	0.07	-0.77	-0.72	-0.36
chr17:58546686-58547992	1306	enhancer	USP32|PPM1D	0.97	1.6	0.97	0.74	0.11	0.83	0.67	0.6	0.21	0.74	-0.06	0.48	0.02	-0.04	0.27	0.65	0.48	0.35	0.14	-0.1	6.23	9.34	7.08	4.29		USP32|PPM1D			USP32::chr17:58469585/-:-000077101|PPM1D::chr17:58677543/+:-000129551|C17orf64::chr17:58499864/+:0000046822|APPBP2::chr17:58603600/-:0000055608
chr4:185393116-185397074	3958	promotor	IRF2	-0.93	-0.83	8.84	6.68	4.45	5.6	4.28	3.67	4.19	5.47	10.74	12.96	10.75	10.06	0.53	1.72	1.16	1.07	44.66	38.24	32.4	28.81	27.88	30.21	IRF2	IRF2|PRIMPOL		IRF2	IRF2::chr4:185350223/-:-000042893|IRF2::chr4:185395725/-:0000000000|CASP3::chr4:185570628/-:0000173554|CASP3::chr4:185559621/-:0000162547|CASP3::chr4:185569784/-:0000172710|PRIMPOL::chr4:185570766/+:-000173692|PRIMPOL::chr4:185582927/+:-000185853|PRIMPOL::chr4:185578235/+:-000181161|PRIMPOL::chr4:185580493/+:-000183419|PRIMPOL::chr4:185573176/+:-000176102
chr17:7358595-7360076	1481	enhancer	TNFSF13|TNFSF12|TMEM256|MPDU1|GPS2|SLC35G6|TNFSF12-TNFSF13|NEURL4|CLDN7|ATP1B2|SENP3|POLR2A|CD68|PLSCR3|SHBG|EIF4A1|YBX2	0.23	0.17	1.47	0.84	0.38	0.27	1.41	0.72	0.75	1.29	1.05	1.94	0.85	1.1	0.05	0.17	0.57	0.17	11.71	8.69	6.74	3.87	1.93	1.86		TNFSF13|TNFSF12|TMEM256|MPDU1|GPS2|SLC35G6|TNFSF12-TNFSF13|NEURL4|CLDN7|ATP1B2|SENP3|POLR2A|CD68|PLSCR3|SHBG|EIF4A1|YBX2	TNK1	SOX15|ZBTB4|YBX2	TNFSF13::chr17:7461608/+:-000101532|TNFSF13::chr17:7462384/+:-000102308|TNFSF12::chr17:7452374/+:-000092298|SAT2::chr17:7531193/-:0000171117|C17orf74::chr17:7328934/+:0000029661|TMEM256::chr17:7307449/-:-000051146|TNFSF12-TNFSF13::chr17:7452374/+:-000092298|SPEM1::chr17:7323678/+:0000034917|MPDU1::chr17:7486964/+:-000126888|EIF5A::chr17:7211693/+:0000146902|EIF5A::chr17:7210855/+:0000147740|EIF5A…
chr12:107127441-107134457	7016	enhancer	RIC8B	0.71	1.99	-0.14	3.01	0.8	-0.24	0.06	0.92	-0.49	-0.57	1.1	4.91	2.17	0.53	0.73	2.36	0.8	-0.37	-0.9	-0.55	0.18	10.43	1.77	-0.64		RIC8B		RFX4	RFX4::chr12:107078476/+:0000048965|RFX4::chr12:106994914/+:0000132527|RFX4::chr12:106976684/+:0000150757|RFX4::chr12:107078476/+:0000048965|RFX4::chr12:106994914/+:0000132527|RFX4::chr12:106976684/+:0000150757|RIC8B::chr12:107168398/+:-000033941
chr7:76178304-76179244	940	enhancer	SSC4D|YWHAG	-0.04	0.01	1.07	0.58	0.46	0.55	0.34	0.07	0.32	0.18	-0.06	-0.17	-0.05	-0.1	-0.04	-0.11	0.04	0.06	1.2	1.19	2.63	1.29	2.03	2.52		SSC4D|YWHAG			UPK3B::chr7:76139739/+:0000038565|DTX2::chr7:76090971/+:0000087333|DTX2::chr7:76099616/+:0000078688|DTX2::chr7:76109737/+:0000068567|DTX2::chr7:76092861/+:0000085443|DTX2::chr7:76090971/+:0000087333|DTX2::chr7:76099616/+:0000078688|DTX2::chr7:76109737/+:0000068567|DTX2::chr7:76092861/+:0000085443|SSC4D::chr7:76033821/-:-000144483|SSC4D::chr7:76039011/-:-000139293|ZP3::chr7:76054368/+:0000123936|Z…
chr1:159717630-159728286	10656	enhancer	CRP|SLAMF8|DUSP23|FCRL6	1.69	-1.16	38.34	8.94	5.11	30.63	10.41	4.83	9.57	13.08	36.45	47.66	47.88	40.83	4.98	7.3	8.1	12.09	-3.06	-2.2	21.42	10.22	20.9	21.54		CRP|SLAMF8|DUSP23|FCRL6			CRP::chr1:159684378/-:-000033252|IGSF9::chr1:159913417/-:0000185131|IGSF9::chr1:159915385/-:0000187099|VSIG8::chr1:159832446/-:0000104160|CFAP45::chr1:159869905/-:0000141619|C1orf204::chr1:159825136/-:0000096850|SLAMF9::chr1:159924043/-:0000195757|SLAMF8::chr1:159796478/+:-000068192|APCS::chr1:159557615/+:0000160015|TAGLN2::chr1:159890326/-:0000162040|TAGLN2::chr1:159894340/-:0000166054|TAGLN2::c…
chr9:127019559-127072771	53212	promotor	NEK6	101.11	62.54	29.83	16.59	19.99	26.76	23.18	13.49	28.31	29.92	13.33	21.52	26.05	18.18	6.79	10.94	12.24	12.43	46.96	48.12	180.24	171.68	213.86	134.78	NEK6		NEK6	NR5A1	NEK6::chr9:127019884/+:0000000000|NEK6::chr9:127020195/+:0000000000|NEK6::chr9:127020529/+:0000000000|NEK6::chr9:127054249/+:0000000000|NEK6::chr9:127055127/+:0000000000|NEK6::chr9:127064214/+:0000000000|NEK6::chr9:127054698/+:0000000000|PSMB7::chr9:127177751/-:0000104980|NR5A1::chr9:127265688/-:0000192917|NR5A1::chr9:127269698/-:0000196927
chrX:100228346-100236902	8556	promotor	ARL13A	4.7	4.49	3.28	0.52	1.09	2.39	0.86	-0.21	0.8	1.99	0.95	1.11	1.39	1.46	-0.13	0.15	1.07	1.87	3.5	0.78	20.87	16.04	16.68	13.39	ARL13A	CENPI|TMEM35|XKRX|NOX1			ARL13A::chrX:100224696/+:0000003650|ARL13A::chrX:100228664/+:0000000000|CENPI::chrX:100356046/+:-000119144|CENPI::chrX:100354797/+:-000117895|TMEM35::chrX:100333835/+:-000096933|XKRX::chrX:100183897/-:-000044449|CSTF2::chrX:100075347/+:0000152999|NOX1::chrX:100129333/-:-000099013|TRMT2B::chrX:100306354/-:0000069452|TRMT2B::chrX:100297300/-:0000060398|TRMT2B::chrX:100307104/-:0000070202|TRMT2B::ch…
chr17:28926630-28928586	1956	genebody_exon	LRRC37BP1	-0.37	0.2	3.13	2.96	2.11	2.21	1.71	1.89	2.18	3.47	0.28	0.83	0.8	0.33	0.04	1.26	0.47	0.53	28.3	24.67	14.11	10.63	9.12	12.78					TBC1D29::chr17:28886583/+:0000040047|GOSR1::chr17:28808160/+:0000118470|GOSR1::chr17:28804425/+:0000122205|GOSR1::chr17:28811231/+:0000115399
chr9:110494146-110518755	24609	other		22.79	23.01	10.6	8.53	10.22	20.11	6.83	9.18	14.54	17.19	26.69	39.13	39.02	33.4	1.47	5.38	8.47	12.84	2.04	1.62	42.19	56.79	93.4	81.16
chr17:71365771-71366559	788	enhancer	CPSF4L|CDC42EP4|FAM104A	0.46	-0.18	0.51	0.44	0.36	0.54	0.31	0.06	0.36	0.56	0.25	0.32	0.32	0.09	0.21	-0.01	-0.04	0.2	-0.4	-0.42	0.41	0.02	0.19	-0.15		CPSF4L|CDC42EP4|FAM104A			CPSF4L::chr17:71258018/-:-000107753|FAM104A::chr17:71223855/-:-000141916|FAM104A::chr17:71228532/-:-000137239|C17orf80::chr17:71228760/+:0000137011|C17orf80::chr17:71229358/+:0000136413|C17orf80::chr17:71231614/+:0000134157|C17orf80::chr17:71228371/+:0000137400|COG1::chr17:71189172/+:0000176599|CDC42EP4::chr17:71308142/-:-000057629|CDC42EP4::chr17:71282750/-:-000083021|CDC42EP4::chr17:71308142/-:…
chr11:2713427-2722729	9302	enhancer	SLC22A18	3.03	0.43	3.39	4.34	1.2	1.68	3.73	2.08	1.31	2.37	0.6	2.01	0.77	-0.69	0.81	1.45	0.46	1.32	53.47	37.55	14.7	10.19	8.1	8.63		SLC22A18			CDKN1C::chr11:2906695/-:0000183966|CDKN1C::chr11:2906994/-:0000184265|SLC22A18AS::chr11:2921019/-:0000198290|SLC22A18AS::chr11:2909864/-:0000187135|SLC22A18::chr11:2920950/+:-000198221
chr7:110772627-110773707	1080	genebody_intron	IMMP2L	0.76	1.13	0.42	1.23	0.89	0.52	0.14	0.64	0.54	0.45	0.25	1.01	0.98	0.67	0.08	1.15	0.53	0.71	0.79	0.71	0.94	3.69	1.07	0.67					LRRN3::chr7:110739936/+:0000032691|LRRN3::chr7:110737082/+:0000035545|LRRN3::chr7:110762470/+:0000010157|LRRN3::chr7:110731061/+:0000041566
chr4:17578488-17579759	1271	promotor	LAP3	-0.28	-0.46	1.07	1.57	1.03	0.76	1.48	0.8	1.27	1.91	0.6	0.99	0.76	0.61	0.42	0.64	0.45	0.25	16.67	12.64	5.3	2.82	2.87	5.06	LAP3	QDPR|MED28			MED28::chr4:17616250/+:-000036491|LAP3::chr4:17578926/+:0000000000|CLRN2::chr4:17516787/+:0000061701|QDPR::chr4:17513856/-:-000064632
chr9:5492621-5513660	21039	promotor	PDCD1LG2	4.01	8.25	0.8	0.52	7.22	37.65	-2.42	-2.21	7.57	16.56	-2.75	0.36	8.34	7.43	-3	-0.81	4.41	8.54	-1.86	1.63	13.39	19.62	115.21	107.75	PDCD1LG2	PLGRKT|RIC1|RLN1|RLN2|PDCD1LG2			CD274::chr9:5456099/+:0000036522|CD274::chr9:5450502/+:0000042119|PLGRKT::chr9:5431982/-:-000060639|PLGRKT::chr9:5437936/-:-000054685|PLGRKT::chr9:5436693/-:-000055928|RIC1::chr9:5629118/+:-000115458|RLN1::chr9:5339872/-:-000152749|RLN2::chr9:5304610/-:-000188011|PDCD1LG2::chr9:5522532/+:-000008872|PDCD1LG2::chr9:5510544/+:0000000000
chr7:142937327-142938248	921	enhancer	CASP2|CLCN1|TMEM139|ZYX|GSTK1	3.15	1.6	0.57	0.23	0.1	0.67	0.3	0.34	0.07	0.2	0.66	0.71	0.33	0.71	0.12	0.13	-0.04	0.22	0.34	-0.08	0.7	0.15	0.14	0.33		CASP2|CLCN1|TMEM139|ZYX|GSTK1	EPHA1		FAM131B::chr7:143057241/-:0000118993|FAM131B::chr7:143056859/-:0000118611|FAM131B::chr7:143059172/-:0000120924|FAM131B::chr7:143059839/-:0000121591|FAM131B::chr7:143056116/-:0000117868|CASP2::chr7:142988632/+:-000050384|CASP2::chr7:142985307/+:-000047059|CASP2::chr7:142986680/+:-000048432|CLCN1::chr7:143013218/+:-000074970|TMEM139::chr7:142982646/+:-000044398|TMEM139::chr7:142981991/+:-000043743|…
chr12:42137487-42138200	713	3 prime	PDZRN4	0.57	0.89	0.5	0.61	0.37	0.13	0.31	0.51	0.5	0.26	1.78	4.51	2.65	1.13	0.23	0.71	0.2	0.19	0.03	0.1	0.25	0.76	0.34	0
chr11:65121746-65122670	924	promotor	TIGD3	0.26	0.45	0.5	0.92	0.64	0.4	0.63	0.52	0.7	0.86	0.12	0.27	0.08	0.21	0.12	0.21	0.34	0.49	7.3	5.93	1.04	0.52	0.8	1.55	TIGD3	SCYL1|FRMD8	SCYL1		DPF2::chr11:65101224/+:0000020522|POLA2::chr11:65029322/+:0000092424|LTBP3::chr11:65321850/-:0000199180|SLC25A45::chr11:65149439/-:0000026769|SLC25A45::chr11:65149856/-:0000027186|SLC25A45::chr11:65147645/-:0000024975|SLC25A45::chr11:65150144/-:0000027474|SLC25A45::chr11:65147704/-:0000025034|SLC25A45::chr11:65150517/-:0000027847|SLC25A45::chr11:65148102/-:0000025432|SLC25A45::chr11:65151171/-:00…
chr11:73308547-73310639	2092	promotor	FAM168A	-0.43	-0.35	2.78	1.8	1.27	1.62	1.74	0.86	0.93	2.47	0.53	0.94	1.38	0.89	0.09	1.08	0.61	0.57	24.6	21.32	8.87	7.95	5.62	8.33	FAM168A	PLEKHB1|MRPL48|FAM168A			PLEKHB1::chr11:73358593/+:-000047954|PLEKHB1::chr11:73360056/+:-000049417|PLEKHB1::chr11:73357222/+:-000046583|PLEKHB1::chr11:73359734/+:-000049095|MRPL48::chr11:73498916/+:-000188277|RAB6A::chr11:73441867/-:0000131228|RAB6A::chr11:73472200/-:0000161561|RAB6A::chr11:73471137/-:0000160498|FAM168A::chr11:73179536/-:-000129011|FAM168A::chr11:73309233/-:0000000000|FAM168A::chr11:73179536/-:-000129011…
chr1:178985646-178996760	11114	promotor	FAM20B	5.23	2.99	6.41	4.72	3.35	4.25	4.22	2.68	2.95	4.1	-0.36	0.71	0.57	0.18	0.79	2.43	1.76	0.6	39.57	29.93	25.2	23.74	20.92	20.3	FAM20B	FAM20B|TOR3A|ANGPTL1	ABL2		FAM20B::chr1:179012849/+:-000016089|FAM20B::chr1:178995073/+:0000000000|FAM20B::chr1:179012849/+:-000016089|FAM20B::chr1:178995073/+:0000000000|ABL2::chr1:179112223/-:0000115463|TOR3A::chr1:179051111/+:-000054351|ANGPTL1::chr1:178834936/-:-000150710|ANGPTL1::chr1:178840214/-:-000145432|ANGPTL1::chr1:178838357/-:-000147289
chr20:33845032-33852063	7031	enhancer	CEP250|EDEM2|TRPC4AP	6.88	1.87	3.93	2.93	0.17	0.06	3.34	2.05	0.37	1.05	1.45	2.25	-0.5	-0.49	1.25	2.64	0.89	0.3	1.74	-0.19	16.64	18.33	1.21	0.19		CEP250|EDEM2|TRPC4AP			CEP250::chr20:34047802/+:-000195739|CEP250::chr20:34050089/+:-000198026|CEP250::chr20:34046124/+:-000194061|CEP250::chr20:34043222/+:-000191159|GDF5::chr20:34025969/-:0000173906|EDEM2::chr20:33735160/-:-000109872|EIF6::chr20:33872294/-:0000020231|EIF6::chr20:33872618/-:0000020555|EIF6::chr20:33872519/-:0000020456|FAM83C::chr20:33880224/-:0000028161|MMP24::chr20:33814538/+:0000030494|TRPC4AP::chr2…
chr17:55261366-55262087	721	enhancer	MSI2	0.69	0.05	0.6	0.05	0.26	0.19	0.34	0.24	-0.01	0.13	1.11	0.48	0.25	0.5	0.27	0.25	0.07	0.09	0.03	0.01	0.82	0.69	0.25	0.2		MSI2			MSI2::chr17:55333930/+:-000071843|MSI2::chr17:55334373/+:-000072286|AKAP1::chr17:55162552/+:0000098814|AKAP1::chr17:55163733/+:0000097633|AKAP1::chr17:55173951/+:0000087415|AKAP1::chr17:55163134/+:0000098232|AKAP1::chr17:55182801/+:0000078565|AKAP1::chr17:55163077/+:0000098289
chr11:925128-927301	2173	promotor	AP2A2	-0.52	-0.1	3.84	2.79	2.11	1.67	2.21	1.35	2.02	2.41	-0.36	-0.06	-0.24	0.33	0.15	1.36	0.48	0.67	34.23	28.05	9.96	5.14	6.22	10.34	AP2A2	MUC2|PIDD1|SLC25A22|PDDC1|POLR2L|CEND1|CHID1			PNPLA2::chr11:819573/+:0000105555|PNPLA2::chr11:818900/+:0000106228|MUC2::chr11:1074874/+:-000147573|PANO1::chr11:797510/+:0000127618|RPLP2::chr11:810233/+:0000114895|RPLP2::chr11:809935/+:0000115193|MUC6::chr11:1036705/-:0000109404|PIDD1::chr11:804462/-:-000120666|PIDD1::chr11:805249/-:-000119879|SLC25A22::chr11:796262/-:-000128866|SLC25A22::chr11:798268/-:-000126860|SLC25A22::chr11:795168/-:-00…
chr10:124178207-124182759	4552	enhancer	DMBT1|ARMS2|HTRA1	4.44	3.11	6.18	2.51	0.64	1.03	5.41	2.05	3.64	1.89	12.98	17.79	12.49	8.25	1.82	2.53	0.53	1.29	-0.91	-0.77	19.56	14.91	9.42	5.29		DMBT1|ARMS2|HTRA1			DMBT1::chr10:124320180/+:-000137421|BTBD16::chr10:124030820/+:0000147387|BTBD16::chr10:124034554/+:0000143653|ARMS2::chr10:124214178/+:-000031419|HTRA1::chr10:124221040/+:-000038281|PLEKHA1::chr10:124151818/+:0000026389|PLEKHA1::chr10:124152696/+:0000025511|PLEKHA1::chr10:124134093/+:0000044114|PLEKHA1::chr10:124145584/+:0000032623
chr8:145596688-145598866	2178	promotor	ADCK5	3.79	1.65	1.64	1.67	1.19	1.96	1.7	1.38	2.22	2.96	-0.33	-0.2	-0.3	0.07	0.33	0.43	-0.41	0.43	17.2	12.29	4.96	1.82	1.65	7.16	ADCK5	SCRT1|DGAT1|PPP1R16A|TMEM249|MFSD3|BOP1|GPT|KIFC2|LRRC14|FBXL6	ADCK5	HSF1|SCRT1|FOXH1	HSF1::chr8:145515269/+:0000081419|RECQL4::chr8:145743209/-:0000144343|HGH1::chr8:145437879/+:0000158809|LRRC24::chr8:145750416/-:0000151550|LRRC24::chr8:145752415/-:0000153549|SCRT1::chr8:145559942/-:-000036746|CPSF1::chr8:145634732/-:0000035866|CPSF1::chr8:145634555/-:0000035689|SLC52A2::chr8:145582847/+:0000013841|SLC52A2::chr8:145582275/+:0000014413|SLC52A2::chr8:145582843/+:0000013845|SLC52A2…
chr20:18477210-18489350	12140	promotor	RBBP9|SEC23B	1.3	1.43	3.32	2.93	1.8	3.3	2.37	1.36	2.11	2.72	-0.51	0.28	1.28	1.07	0.82	1.41	0.93	0.44	46.45	38.3	8.8	9.6	8.51	9.85	RBBP9|SEC23B	DZANK1|DTD1		ZNF133	RBBP9::chr20:18477886/-:0000000000|SEC23B::chr20:18488187/+:0000000000|SEC23B::chr20:18488209/+:0000000000|SEC23B::chr20:18491465/+:-000002115|SEC23B::chr20:18488606/+:0000000000|DZANK1::chr20:18446020/-:-000031190|DZANK1::chr20:18447828/-:-000029382|POLR3F::chr20:18449587/+:0000027623|POLR3F::chr20:18448032/+:0000029178|DTD1::chr20:18568555/+:-000079205|ZNF133::chr20:18286914/+:0000190296|ZNF133…
chr6:37597654-37598808	1154	enhancer	ZFAND3|CCDC167	2.49	2.55	0.42	0.33	1.58	0.2	0.45	0.08	0.57	0.97	0.78	1.92	2.61	2.45	0.24	0.54	0.95	0.84	-0.04	0.39	0.5	0.77	3.44	1.86		ZFAND3|CCDC167			ZFAND3::chr6:37787306/+:-000188498|CMTR1::chr6:37400906/+:0000196748|CMTR1::chr6:37403399/+:0000194255|CCDC167::chr6:37467699/-:-000129955|MDGA1::chr6:37665765/-:0000066957
chr3:23525656-23526431	775	genebody_intron	UBE2E2	0.69	0.27	0.46	0.66	-0.03	0.06	0.3	0.45	0.08	0.13	1.4	2.53	0.68	0.35	0.25	0.49	0.22	0.33	-0.02	-0.03	0.05	0.1	-0.13	-0.01
chr3:133379978-133388127	8149	promotor	TOPBP1	2.14	1.35	1.85	2.24	1.29	1.91	2.13	2	1.79	2.54	0.53	0.61	0.62	0.42	0.88	0.94	0.43	0.51	35.49	31.37	5.43	6.24	7.52	10.41	TOPBP1	TF|SRPRB			TF::chr3:133464976/+:-000076849|SRPRB::chr3:133502876/+:-000114749|SRPRB::chr3:133524519/+:-000136392|CDV3::chr3:133293882/+:0000086096|CDV3::chr3:133293277/+:0000086701|CDV3::chr3:133292433/+:0000087545|TOPBP1::chr3:133379977/-:-000000001|TOPBP1::chr3:133380736/-:0000000000
chr17:7232030-7234105	2075	promotor	NEURL4	0.73	-0.39	1.69	0.8	0.35	1.47	1.82	0.62	1.23	2.11	0.15	-0.08	0.23	0.29	0.67	0.4	0.26	0.87	23.56	21.32	9.47	6.12	6.37	10.88	NEURL4	C17orf74|SPEM1|GPS2|SLC35G6|DLG4|CTDNEP1|CHRNB1|GABARAP|DVL2|FGF11|CLDN7|NLGN2|ACAP1|TMEM95|ASGR1|POLR2A|TMEM102|PHF23|TNK1|KCTD11|YBX2	TNK1	ZBTB4|YBX2	ACADVL::chr17:7123782/+:0000108248|ACADVL::chr17:7123922/+:0000108108|ACADVL::chr17:7123149/+:0000108881|ACADVL::chr17:7120443/+:0000111587|C17orf74::chr17:7328934/+:-000094829|TMEM256::chr17:7307449/-:0000073344|SPEM1::chr17:7323678/+:-000089573|EIF5A::chr17:7211693/+:0000020337|EIF5A::chr17:7210855/+:0000021175|EIF5A::chr17:7212933/+:0000019097|EIF5A::chr17:7211287/+:0000020743|EIF5A::chr17:721…
chr19:7489760-7492004	2244	enhancer	C19orf45|ARHGEF18|CAMSAP3|INSR|MCOLN1|PNPLA6|ZNF358	5.5	3.52	2.34	2.12	0.13	-0.09	1.76	1.4	0.81	0.31	2.65	3.81	0.86	0.49	0.85	2.29	0.18	0.19	0.41	-0.12	6.77	10.51	0.9	-0.07		C19orf45|ARHGEF18|CAMSAP3|INSR|MCOLN1|PNPLA6|ZNF358	INSR	ZNF358	C19orf45::chr19:7562444/+:-000070440|C19orf45::chr19:7565691/+:-000073687|ARHGEF18::chr19:7505229/+:-000013225|ARHGEF18::chr19:7504573/+:-000012569|ARHGEF18::chr19:7459998/+:0000029762|ARHGEF18::chr19:7505229/+:-000013225|ARHGEF18::chr19:7504573/+:-000012569|ARHGEF18::chr19:7459998/+:0000029762|CAMSAP3::chr19:7660787/+:-000168783|INSR::chr19:7294010/-:-000195750|MCOLN1::chr19:7587495/+:-000095491…
chr2:120452222-120453066	844	enhancer	SCTR|PTPN4	0.68	0.3	0.57	0.31	0.09	-0.02	0.54	-0.09	0.25	0.49	5.1	4.7	4.83	4.78	0.37	0.26	0.35	0.19	1.33	0.66	2.5	0.97	0.15	0.24		SCTR|PTPN4			SCTR::chr2:120282027/-:-000170195|TMEM177::chr2:120438407/+:0000013815|TMEM177::chr2:120436742/+:0000015480|CFAP221::chr2:120302007/+:0000150215|CFAP221::chr2:120303660/+:0000148562|PTPN4::chr2:120567412/+:-000114346|PTPN4::chr2:120517206/+:-000064140
chr1:223959011-223964540	5529	enhancer	CAPN8	3.74	6.23	0.15	1.45	3.75	2.17	0.94	-0.28	3.44	2.65	0.15	1.05	2.21	1.99	-0.2	0.88	2.19	1.98	0.93	1.46	6.94	7.5	31.96	13.26		CAPN8			TP53BP2::chr1:223994648/-:0000030108|TP53BP2::chr1:223998214/-:0000033674|TP53BP2::chr1:224002054/-:0000037514|TP53BP2::chr1:224006038/-:0000041498|TP53BP2::chr1:224009068/-:0000044528|TP53BP2::chr1:224033673/-:0000069133|TP53BP2::chr1:223994648/-:0000030108|TP53BP2::chr1:223998214/-:0000033674|TP53BP2::chr1:224002054/-:0000037514|TP53BP2::chr1:224006038/-:0000041498|TP53BP2::chr1:224009068/-:000…
chr12:80805299-80814193	8894	3 prime	OTOGL	-1.45	-2.2	3.28	0.64	-0.7	-0.85	1.42	0.16	-0.04	0.1	1.7	0.93	-0.2	0.14	1.21	0.73	-0.26	0	-2.27	-1.75	3.47	-0.36	-1.67	-0.59
chr4:104345583-104346783	1200	genebody_exon	LOC101929448	1.33	0.2	1.07	0.65	0.11	0.39	0.84	0.28	0.23	0.33	12.66	19.59	17.34	17.19	0.54	0.59	0.17	0.28	0.23	-0.09	2.08	3.93	1.3	1.16
chr17:76182541-76184048	1507	promotor	AFMID|TK1	1.24	0.21	1.35	1.53	0.76	1.2	0.46	0.94	0.92	1.98	0.11	0.68	0.21	0.88	0.48	0.46	0.68	0.24	14.61	15.36	1.75	1.12	2.14	4.65	AFMID|TK1	TMC6|BIRC5|TMEM235|PGS1			TMC6::chr17:76128487/-:-000054054|TMC6::chr17:76124860/-:-000057681|TMC6::chr17:76122986/-:-000059555|C17orf99::chr17:76142433/+:0000040108|SOCS3::chr17:76355263/-:0000171215|SOCS3::chr17:76356159/-:0000172111|TMC8::chr17:76126858/+:0000055683|TMC8::chr17:76127361/+:0000055180|BIRC5::chr17:76210276/+:-000026228|SYNGR2::chr17:76164670/+:0000017871|AFMID::chr17:76183397/+:0000000000|TK1::chr17:7618…
chr10:7913872-7914582	710	enhancer	KIN|GATA3	-0.14	0.31	0.47	0.5	0.01	0.02	0.38	0.42	0.21	0.15	0.37	0.44	0.38	0.18	0.17	0.27	0.34	0.33	2.55	1.47	1.45	2.03	0.61	0.27		KIN|GATA3		GATA3	ATP5C1::chr10:7830092/+:0000083780|ITIH2::chr10:7745235/+:0000168637|TAF3::chr10:7860466/+:0000053406|GATA3::chr10:8096666/+:-000182084|GATA3::chr10:8097249/+:-000182667|KIN::chr10:7829989/-:-000083883
chr4:66808265-66809473	1208	other		-0.29	0.06	0.85	0.53	0.11	-0.04	0.25	0.28	0.18	-0.2	0.31	0.62	0.04	0.4	0.23	0.76	-0.11	0.04	-0.42	-0.42	2.22	2.96	0.5	0.13
chr14:53339942-53341280	1338	enhancer	ERO1L|GNPNAT1	2.26	1.65	1.38	1.1	0.02	0.28	1.48	0.76	0.92	0.35	8.9	14.89	11.26	8.69	0.24	0.08	-0.04	0.25	-0.08	-0.53	3.45	3.91	2.47	3.13		ERO1L|GNPNAT1			FERMT2::chr14:53417814/-:0000076534|FERMT2::chr14:53417294/-:0000076014|ERO1L::chr14:53162648/-:-000177294|GNPNAT1::chr14:53251381/-:-000088561|GNPNAT1::chr14:53258385/-:-000081557|STYX::chr14:53196882/+:0000143060|STYX::chr14:53197176/+:0000142766
chr3:187284438-187287149	2711	3 prime	RTP4|RTP2|BCL6|SST	3.37	1.66	5.32	2.25	0.43	1.57	2.09	0.23	0.78	0.96	7.85	9.22	4.95	6.43	1.07	2.39	0.34	1.25	1.62	0.31	15.32	9.61	3.79	4.07				BCL6	SST::chr3:187388200/-:0000101051|RTP4::chr3:187086167/+:0000198271|BCL6::chr3:187463512/-:0000176363|BCL6::chr3:187454284/-:0000167135|BCL6::chr3:187452694/-:0000165545|BCL6::chr3:187451490/-:0000164341|RTP2::chr3:187420344/-:0000133195
chr10:43132356-43134742	2386	promotor	ZNF33B	-1.22	-0.89	3.06	2.98	1.51	2.39	1.87	1.49	1.7	1.2	1.67	2.75	2.82	0.95	0.49	0.7	0.44	-0.01	23.13	17.5	14.93	11.4	11.27	11.44	ZNF33B	BMS1|ZNF33B		ZNF33B	BMS1::chr10:43279809/+:-000145067|BMS1::chr10:43277953/+:-000143211|ZNF33B::chr10:43134284/-:0000000000|ZNF33B::chr10:43127471/-:-000004885|ZNF33B::chr10:43132419/-:0000000000|ZNF33B::chr10:43127886/-:-000004470|ZNF33B::chr10:43109415/-:-000022941|ZNF33B::chr10:43109805/-:-000022551|ZNF33B::chr10:43090146/-:-000042210|ZNF33B::chr10:43134284/-:0000000000|ZNF33B::chr10:43127471/-:-000004885|ZNF33B:…
chr7:42275732-42277702	1970	promotor	GLI3	-0.81	-0.93	1.02	1.44	1.17	1.01	1.22	1.26	1.65	2.02	-0.48	0.3	0.27	0.29	-0.14	-0.05	-0.09	0.13	30.48	22.55	9.26	4.7	6.24	11.07	GLI3	GLI3		GLI3	GLI3::chr7:42262893/-:-000012839|GLI3::chr7:42276617/-:0000000000
chr2:201809275-201810111	836	enhancer	NDUFB3|CFLAR|PPIL3|CLK1	0.83	1.62	-0.02	0.56	0.52	0.55	0.36	-0.09	0.73	1.2	0.21	0.87	0.61	1.04	-0.04	0.39	0.62	0.1	0.15	-0.24	1.02	1.46	-0.07	0.37		NDUFB3|CFLAR|PPIL3|CLK1	CLK1		ORC2::chr2:201824162/-:0000014051|ORC2::chr2:201828423/-:0000018312|ORC2::chr2:201822855/-:0000012744|NDUFB3::chr2:201943603/+:-000133492|NDUFB3::chr2:201936461/+:-000126350|NDUFB3::chr2:201937061/+:-000126950|CFLAR::chr2:201980876/+:-000170765|CFLAR::chr2:202004997/+:-000194886|CFLAR::chr2:201994451/+:-000184340|CFLAR::chr2:201997687/+:-000187576|CFLAR::chr2:201997751/+:-000187640|CFLAR::chr2:20…
chr1:46418716-46424175	5459	genebody_intron	MAST2	2.84	0.47	6.07	2.9	0.13	-0.36	0.99	2.04	0.69	-0.58	3.14	5.75	0.58	0.2	1.6	2.97	0.06	-0.08	0.47	-0.92	28.33	32.62	5.99	2.94			MAST2		MAST2::chr1:46269284/+:0000149432|PIK3R3::chr1:46598466/-:0000174291|PIK3R3::chr1:46598707/-:0000174532|PIK3R3::chr1:46597627/-:0000173452|PIK3R3::chr1:46598379/-:0000174204|PIK3R3::chr1:46598466/-:0000174291|PIK3R3::chr1:46598707/-:0000174532|PIK3R3::chr1:46597627/-:0000173452|PIK3R3::chr1:46598379/-:0000174204
chr4:54666865-54668007	1142	other		-0.12	0.15	0.36	0.11	0.43	0.88	0.17	0.24	0.45	0.11	1.37	0.95	0.93	1.25	0.27	0.25	0.13	0.58	-0.23	-0.13	-0.07	-0.02	0.15	0.4
chr2:222365899-222367995	2096	genebody_intron	EPHA4	1.03	1	1.44	0.61	2.33	1.45	1	0.09	2.74	1.53	4.72	5.07	9.66	8.04	0.1	0.49	1.67	1.77	3.28	3.58	1.99	2.91	16.75	7.52			EPHA4		EPHA4::chr2:222437000/-:0000069005|EPHA4::chr2:222437077/-:0000069082|EPHA4::chr2:222438921/-:0000070926
chr20:19739431-19741121	1690	enhancer	RIN2	1.56	0.77	1.23	1.29	0.31	0.16	1.01	1.26	0.76	0.52	5.94	8.53	6.14	4.2	0.45	0.48	0.5	0.02	0.46	-0.47	2.62	2.12	0.92	0.15		RIN2			RIN2::chr20:19870209/+:-000129088|RIN2::chr20:19867164/+:-000126043
chr12:7695003-7710617	15614	enhancer	CD163|DPPA3|CD163L1	0.55	1.69	6.19	0.87	0.16	2.64	0.87	-0.33	0.3	0.98	5.86	3.22	3.68	5.71	0.8	-0.15	1.1	0.71	-2.2	-2.36	9.26	5.09	13.07	8.03		CD163|DPPA3|CD163L1			GDF3::chr12:7848359/-:0000137742|CD163::chr12:7656413/-:-000038590|CLEC4C::chr12:7902068/-:0000191451|CLEC4C::chr12:7900073/-:0000189456|DPPA3::chr12:7864049/+:-000153432|APOBEC1::chr12:7823194/-:0000112577|APOBEC1::chr12:7805430/-:0000094813|APOBEC1::chr12:7818498/-:0000107881|APOBEC1::chr12:7818477/-:0000107860|CD163L1::chr12:7596780/-:-000098223
chr6:90235085-90236272	1187	enhancer	RRAGD|ANKRD6|UBE2J1	0.85	0.07	1.67	1.4	-0.05	0.02	0.78	0.54	0.14	-0.04	0.51	1.77	0.42	0.22	0.58	1.59	0.23	0.02	0.89	0.21	1.83	4.1	0.08	0.02		RRAGD|ANKRD6|UBE2J1			LYRM2::chr6:90348473/-:0000112201|ANKRD6::chr6:90272036/+:-000035764|ANKRD6::chr6:90276552/+:-000040280|ANKRD6::chr6:90276556/+:-000040284|ANKRD6::chr6:90142896/+:0000092189|ANKRD6::chr6:90272036/+:-000035764|ANKRD6::chr6:90276552/+:-000040280|ANKRD6::chr6:90276556/+:-000040284|ANKRD6::chr6:90142896/+:0000092189|UBE2J1::chr6:90062618/-:-000172467|RRAGD::chr6:90121994/-:-000113091
chr13:98252741-98253593	852	3 prime	RAP2A	2.13	1.46	0.57	0.85	0.48	0.01	0.34	0.31	0.63	0.39	3.94	6.95	4.85	3.54	0.58	0.52	0.51	0.49	0.27	0.15	0.2	0.13	0.17	0.17					RAP2A::chr13:98086474/+:0000166267
chr5:157809120-157818262	9142	genebody_intron	LOC101927697	3.58	4.47	2.59	1.01	3.19	2.04	2.51	-0.04	1.75	2.92	5.09	3.44	5.33	5.29	0.25	0.58	2.21	1.88	-0.33	-0.21	5.51	2.45	12.06	8.7
chr2:222863975-222865240	1265	3 prime	PAX3	1.17	1.43	0.27	1.06	1.02	0.69	0.9	0.89	1.11	0.73	1.55	3.86	2.66	1.82	0.21	1.2	0.73	0.64	0.11	0.35	1.08	4.56	2.58	0.98
chr9:137423053-137460488	37435	enhancer	COL5A1	36.76	19.02	13.56	3.01	2.27	6.01	10.38	3.58	1.42	6.74	5.63	1.82	-0.01	0.7	5.32	3.59	0.95	3.74	-1.07	-0.98	57.29	29.51	16.11	25.96		COL5A1		RXRA	COL5A1::chr9:137533650/+:-000073162|RXRA::chr9:137298427/+:0000124626|RXRA::chr9:137293477/+:0000129576|RXRA::chr9:137271140/+:0000151913|RXRA::chr9:137299994/+:0000123059
chr6:143205243-143207497	2254	enhancer	AIG1|HIVEP2	0.26	1.77	2.95	3.3	3.2	2.01	2.21	2.42	3.56	2.64	2.23	5.66	5.04	3.71	0.64	1.95	1.75	1.72	6.76	3.16	4.26	7.43	9.12	5.17		AIG1|HIVEP2		HIVEP2	HIVEP2::chr6:143266337/-:0000058840|HIVEP2::chr6:143097327/-:-000107916|HIVEP2::chr6:143158183/-:-000047060|HIVEP2::chr6:143104751/-:-000100492|HIVEP2::chr6:143096261/-:-000108982|HIVEP2::chr6:143266337/-:0000058840|HIVEP2::chr6:143097327/-:-000107916|HIVEP2::chr6:143158183/-:-000047060|HIVEP2::chr6:143104751/-:-000100492|HIVEP2::chr6:143096261/-:-000108982|HIVEP2::chr6:143266337/-:0000058840|HIV…
chr11:34794435-34797665	3230	enhancer	PDHX	0.79	-0.91	2.99	1.09	-0.17	-0.02	0.12	0.42	-0.33	-0.45	3.13	4.82	1.63	0.17	0.61	-0.18	-0.04	0.02	0.57	-0.15	1.46	0.47	-1.05	-0.23		PDHX		EHF	EHF::chr11:34664174/+:0000130261|EHF::chr11:34642587/+:0000151848|EHF::chr11:34654010/+:0000140425|PDHX::chr11:34937676/+:-000140011|APIP::chr11:34937957/-:0000140292
chr7:72847495-72848632	1137	promotor	FZD9	2.01	1.48	0.82	0.29	0.46	0.6	0.35	0.69	0.53	0.46	0.09	0.23	-0.2	-0.01	-0.07	-0.02	-0.1	0.15	3.04	2.98	1.37	0.7	0.59	1.62	FZD9	NSUN5|TRIM50		MLXIPL	MLXIPL::chr7:73038869/-:0000190237|FZD9::chr7:72848108/+:0000000000|NSUN5::chr7:72722863/-:-000124632|TRIM50::chr7:72738802/-:-000108693|TRIM50::chr7:72739578/-:-000107917|TRIM50::chr7:72742084/-:-000105411|FKBP6::chr7:72742154/+:0000105341|FKBP6::chr7:72742234/+:0000105261|BAZ1B::chr7:72936614/-:0000087982|TBL2::chr7:72993012/-:0000144380|BCL7B::chr7:72972064/-:0000123432
chr20:44717480-44719235	1755	promotor	NCOA5	-0.91	-0.45	3.16	1.99	1.82	2.36	2.41	1.5	0.99	2.58	1.56	2.36	2.01	1.38	0.17	0.76	0.27	0.59	27.05	23.48	13.05	8.56	9.72	12.35	NCOA5	ZNF335|NCOA5|CD40|NEURL2|PLTP		ZNF335	ZNF335::chr20:44600098/-:-000117382|ZNF335::chr20:44600832/-:-000116648|NCOA5::chr20:44718579/-:0000000000|NCOA5::chr20:44708091/-:-000009389|CTSA::chr20:44519590/+:0000197890|CDH22::chr20:44880331/-:0000161096|CDH22::chr20:44880331/-:0000161096|CD40::chr20:44746892/+:-000027657|SLC12A5::chr20:44657820/+:0000059660|SLC12A5::chr20:44650328/+:0000067152|NEURL2::chr20:44519925/-:-000197555|PLTP::chr…
chr13:20734307-20735376	1069	promotor	GJA3	-0.14	0.02	0.33	0.91	0.92	0.15	0.34	0.41	0.45	0.39	0.12	0.16	0.03	-0.03	-0.08	0.34	0.47	0.08	13.53	11.05	0.35	0.61	1.17	0.64	GJA3	GJA3			ZMYM2::chr13:20567202/+:0000167105|ZMYM2::chr13:20544164/+:0000190143|GJA3::chr13:20735182/-:0000000000|GJA3::chr13:20717443/-:-000016864|GJB2::chr13:20763741/-:0000028365|GJB2::chr13:20767113/-:0000031737|GJB6::chr13:20797633/-:0000062257|GJB6::chr13:20806533/-:0000071157|GJB6::chr13:20804945/-:0000069569|GJB6::chr13:20805371/-:0000069995|GJB6::chr13:20805643/-:0000070267|GJB6::chr13:20803887/-:…
chr6:71543885-71544937	1052	genebody_intron	SMAP1	1.59	0.22	1.02	0.14	-0.04	-0.04	0.16	0.49	0.3	-0.12	2.2	1.89	0.68	0.59	0.38	0.33	0.04	0.05	0.44	-0.11	0.84	0.22	-0.08	-0.02					B3GAT2::chr6:71666787/-:0000121850|SMAP1::chr6:71377473/+:0000166412|SMAP1::chr6:71378232/+:0000165653
chr19:57106359-57107202	843	promotor	ZNF71	0.22	-0.1	0.8	0.44	0.43	0.35	0.52	0.47	0.28	0.28	0	-0.05	-0.03	-0.05	0.24	0.4	0.4	0.24	13.72	9.1	2.82	1.93	2.12	1.65	ZNF71	SMIM17|ZNF71|ZNF667		ZFP28|ZNF583|ZNF471|ZNF470|ZNF71|ZNF667	ZFP28::chr19:57050316/+:0000056043|SMIM17::chr19:57154526/+:-000047324|SMIM17::chr19:57156935/+:-000049733|ZNF583::chr19:56915717/+:0000190642|ZNF583::chr19:56915693/+:0000190666|ZNF583::chr19:56918394/+:0000187965|ZNF583::chr19:56915382/+:0000190977|ZNF835::chr19:57183122/-:0000075920|ZNF835::chr19:57176612/-:0000069410|ZNF471::chr19:57022885/+:0000083474|ZNF471::chr19:57019211/+:0000087148|ZNF4…
chr6:140000191-140035878	35687	other		7.69	4.46	37.54	25.86	7.76	4.5	15.56	18.05	15.82	5.37	54.36	97.89	72.13	41.86	7.68	18.63	11.25	5.11	-8.17	-7.68	51.4	68.45	30.29	7.17
chr10:29921985-29949184	27199	promotor	SVIL	18.7	20.77	4.41	3.18	4.21	4.7	3.16	2.31	6.67	9.15	5.46	5.04	7.73	10.21	0.78	2.91	3.26	6.38	4.06	7.2	8.7	9.86	30.56	19.03	SVIL	SVIL			SVIL::chr10:29975579/-:0000026395|SVIL::chr10:29858240/-:-000063745|SVIL::chr10:29946996/-:0000000000|SVIL::chr10:30024729/-:0000075545|SVIL::chr10:29923900/-:0000000000|SVIL::chr10:29844036/-:-000077949|SVIL::chr10:29852220/-:-000069765|SVIL::chr10:29975579/-:0000026395|SVIL::chr10:29858240/-:-000063745|SVIL::chr10:29946996/-:0000000000|SVIL::chr10:30024729/-:0000075545|SVIL::chr10:29923900/-:00…
chr2:28200134-28212577	12443	enhancer	RBKS	0.24	2.36	-0.28	0.41	2.8	1.8	-0.86	0.46	3.13	3.68	0.87	2.41	2.64	3.19	0.95	0.17	2.31	2.55	-3.15	-2.31	-1.41	0.11	11.28	5.88		RBKS			BRE::chr2:28117399/+:0000082735|BRE::chr2:28113481/+:0000086653|BRE::chr2:28115249/+:0000084885|RBKS::chr2:28113262/-:-000086872|RBKS::chr2:28081437/-:-000118697|RBKS::chr2:28093756/-:-000106378|RBKS::chr2:28113262/-:-000086872|RBKS::chr2:28081437/-:-000118697|RBKS::chr2:28093756/-:-000106378
chr8:85737051-85737974	923	genebody_intron	RALYL	-0.35	-0.07	0.81	-0.16	-0.13	0.1	0.25	-0.14	-0.23	-0.14	0.2	-0.24	-0.13	0.07	0.29	-0.15	-0.04	-0.04	-0.29	-0.26	1.18	-0.15	-0.28	-0.04					RALYL::chr8:85618161/+:0000118890
chr4:130743598-130744714	1116	other		0.64	0.4	0.6	0.66	0.28	0.24	0.24	0.19	0.46	0.03	1.79	3.67	2.68	1.09	0.1	0.43	0.26	0.61	-0.08	-0.08	0.51	0.19	-0.04	0.29
chr3:35225116-35227093	1977	genebody_intron	LOC101928135	0.81	1.19	3.62	1.4	0.44	0.32	1.45	1.1	0.55	0.78	14.55	22.08	16.9	11.23	0.55	0.88	0.43	0.03	-0.65	-0.63	9.46	7.09	2.07	1.2
chr1:195899955-195901169	1214	genebody_intron	FAM72C|SRGAP2D	-0.48	-0.41	0.85	0.03	-0.18	-0.09	0.3	0.06	-0.14	-0.25	0.41	0.3	-0.1	-0.07	0.26	0.3	0.03	0.02	-0.36	-0.25	0.49	0.08	-0.17	0.01
chr7:98739038-98742665	3627	promotor	SMURF1	-0.81	-0.36	3.3	3.52	1.61	2.28	2.57	1.78	2.35	3.25	0.68	1.32	0.72	1.38	-0.08	0.94	0.08	0.3	40.98	32.41	24.65	16.8	12.21	18.16	SMURF1	ARPC1A			SMURF1::chr7:98741742/-:0000000000|ARPC1A::chr7:98923495/+:-000180830|ARPC1A::chr7:98930947/+:-000188282
chr16:53617195-53618026	831	enhancer	AKTIP|FTO	0.52	0.11	0.75	0.02	0.01	-0.03	0.1	0.37	-0.12	-0.02	1.03	2.38	1.02	0.45	0.08	0.26	0.08	0.08	0.23	-0.12	0.91	0.45	-0.09	-0.27		AKTIP|FTO			RPGRIP1L::chr16:53737770/-:0000119744|RPGRIP1L::chr16:53734641/-:0000116615|AKTIP::chr16:53534240/-:-000082955|AKTIP::chr16:53537169/-:-000080026|RBL2::chr16:53468350/+:0000148845|FTO::chr16:53737874/+:-000119848
chr2:162846852-162848021	1169	3 prime	SLC4A10|FAP|DPP4|GCG	0.4	0.93	0.88	0.54	0.44	0.34	0.58	0.32	0.36	0.33	4.14	7.5	7.67	6.38	0.3	0.25	0.22	0.65	-0.09	-0.2	1.53	1.73	0.65	0.5					DPP4::chr2:162931051/-:0000083030|GCG::chr2:163005696/-:0000157675|GCG::chr2:163008913/-:0000160892
chr16:75071597-75088994	17397	enhancer	ZFP1|WDR59|CTRB1	15.8	11.83	7.11	11.15	1.97	2.17	3.11	3.07	1.62	0.96	12.61	23.62	12.94	8.99	2.27	4.12	1.39	2.71	3.19	-0.07	14.27	41.27	10.34	2.74		ZFP1|WDR59|CTRB1		ZFP1	ZNRF1::chr16:75032914/+:0000038683|ZFP1::chr16:75186806/+:-000097812|ZFP1::chr16:75182420/+:-000093426|WDR59::chr16:75019016/-:-000052581|CTRB2::chr16:75241071/-:0000152077|CTRB1::chr16:75252883/+:-000163889|LDHD::chr16:75150669/-:0000061675|BCAR1::chr16:75285525/-:0000196531|BCAR1::chr16:75282223/-:0000193229|BCAR1::chr16:75286295/-:0000197301|BCAR1::chr16:75272979/-:0000183985
chr1:115609791-115610379	588	genebody_intron	TSPAN2	0.56	0.72	0.41	0.35	0.49	0.19	0.56	-0.01	0.32	0.2	0.18	0.81	0.44	0.12	0.4	0.58	0.2	0.31	0.62	0.05	-0.11	0.02	-0.13	-0.18					TSPAN2::chr1:115632120/-:0000021741|TSHB::chr1:115575982/+:0000033809|TSHB::chr1:115572444/+:0000037347
chr2:128143237-128172164	28927	promotor	PROC	29.96	19.49	28.84	19.83	6.49	8.48	15.8	11.37	9.71	10.97	26.56	43.93	35.96	33.15	4.98	12.86	3.68	4.81	33.08	22.24	94.82	119.5	38.47	31.01	PROC	MAP3K2|ERCC3|CYP27C1|PROC|MYO7B	MAP3K2		MAP3K2::chr2:128100804/-:-000042433|ERCC3::chr2:128051293/-:-000091944|ERCC3::chr2:128051669/-:-000091568|ERCC3::chr2:128051751/-:-000091486|IWS1::chr2:128284086/-:0000111922|CYP27C1::chr2:127961146/-:-000182091|CYP27C1::chr2:127963342/-:-000179895|PROC::chr2:128175995/+:-000003831|PROC::chr2:128177497/+:-000005333|MYO7B::chr2:128293377/+:-000121213|MYO7B::chr2:128317274/+:-000145110|MYO7B::chr2:…
chr3:190280490-190285421	4931	promotor	IL1RAP	1.49	1.51	3.18	5.94	3.75	5.7	0.34	0.69	3.38	2.18	10.32	24.13	19.15	14.5	0.63	3.32	2.12	4.5	-0.93	-0.69	1.98	3.71	7.58	10.56	IL1RAP	TMEM207			TMEM207::chr3:190167664/-:-000112826|CLDN16::chr3:190105660/+:0000174830|IL1RAP::chr3:190273918/+:0000006572|IL1RAP::chr3:190268130/+:0000012360|IL1RAP::chr3:190282077/+:0000000000|IL1RAP::chr3:190231839/+:0000048651
chr15:67612729-67624571	11842	enhancer	AAGAB|IQCH|C15orf61	0.75	-0.04	4.63	2.35	0.13	-0.16	1.06	0.91	-0.03	-1.21	5.4	7.48	3.15	1.07	1.15	2.08	0.55	0.19	-2.72	-2.84	6.09	10	0.84	-0.78		AAGAB|IQCH|C15orf61		SMAD3	AAGAB::chr15:67529157/-:-000083572|AAGAB::chr15:67547073/-:-000065656|AAGAB::chr15:67528841/-:-000083888|AAGAB::chr15:67547535/-:-000065194|IQCH::chr15:67663765/+:-000039194|IQCH::chr15:67664448/+:-000039877|IQCH::chr15:67553609/+:0000059120|IQCH::chr15:67649682/+:-000025111|IQCH::chr15:67636400/+:-000011829|IQCH::chr15:67547137/+:0000065592|IQCH::chr15:67652184/+:-000027613|IQCH::chr15:67663765/…
chr14:93214523-93215340	817	promotor	LGMN	-0.26	-0.04	0.3	0.88	0.41	0.26	0.76	0.63	0.59	0.6	0.23	0.89	0.42	0.22	0.31	0.54	0.38	0.15	7.34	5.88	1.34	0.93	0.8	0.95	LGMN	CHGA|GOLGA5|LGMN			CHGA::chr14:93389444/+:-000174104|GOLGA5::chr14:93260575/+:-000045235|GOLGA5::chr14:93263752/+:-000048412|LGMN::chr14:93215046/-:0000000000|LGMN::chr14:93199159/-:-000015364|LGMN::chr14:93207523/-:-000007000|LGMN::chr14:93215046/-:0000000000|LGMN::chr14:93199159/-:-000015364|LGMN::chr14:93207523/-:-000007000
chr8:122707788-122710555	2767	enhancer	HAS2	1.5	2.11	1.28	1.69	0.48	2.61	0.48	0.92	0.82	1.31	6.35	13.26	11.45	9.04	-0.08	1.58	1.13	3.83	0.01	0.27	2.72	5.09	2.66	5.53		HAS2			HAS2::chr8:122653629/-:-000054159
chr1:167411079-167425273	14194	enhancer	RCSD1	4.14	2.69	0.58	1.47	1.27	1.52	1.25	1.4	1.66	2.34	1.57	0.48	2.69	0.57	1.85	1.33	0.85	0.25	10.46	7.34	2.18	0.8	0.91	0.08		RCSD1		POU2F1	CD247::chr1:167487846/-:0000062573|RCSD1::chr1:167599473/+:-000174200|CREG1::chr1:167523055/-:0000097782|POU2F1::chr1:167298280/+:0000112799
chr1:17277889-17278779	890	genebody_intron	CROCC	0.62	-0.2	0.66	0.09	-0.32	-0.3	0.21	0	-0.12	0.22	4.5	5.78	4.63	3.7	0.14	0.03	-0.11	-0.05	-0.64	-0.52	-0.05	-0.23	-0.15	-0.26					SDHB::chr1:17380664/-:0000101885|ATP13A2::chr1:17338466/-:0000059687|CROCC::chr1:17248444/+:0000029445|PADI2::chr1:17445947/-:0000167168|MFAP2::chr1:17304808/-:0000026029|MFAP2::chr1:17308080/-:0000029301|MFAP2::chr1:17307172/-:0000028393
chr6:11230609-11293934	63325	promotor	NEDD9	16	4.32	20.22	4.59	1.52	0.3	12.45	1.96	-1.9	2.64	4.58	0.77	-4.26	-1.13	7.82	8.23	4.26	3.18	21.49	6.09	36.04	7.78	0.07	2.29	NEDD9	ELOVL2|ERVFRD-1			SMIM13::chr6:11094265/+:0000136344|NEDD9::chr6:11306387/-:0000012453|NEDD9::chr6:11232914/-:0000000000|NEDD9::chr6:11382580/-:0000088646|NEDD9::chr6:11306387/-:0000012453|NEDD9::chr6:11232914/-:0000000000|NEDD9::chr6:11382580/-:0000088646|ELOVL2::chr6:11044623/-:-000185986|ERVFRD-1::chr6:11105862/-:-000124747|ERVFRD-1::chr6:11112070/-:-000118539
chr8:69635857-69647623	11766	genebody_intron	C8orf34	-0.99	2.94	0.15	-1.79	-0.44	14.58	-0.5	0.13	2.35	5.53	7.11	6.35	13.71	21.29	-0.69	-1.36	1.76	8.93	-4.38	-3.63	-3.65	-3.39	10.16	27.23
chr9:124720467-124727366	6899	enhancer	MORN5	5.14	3.53	2.56	0.62	-0.21	5.21	1.52	0.32	1.61	4.35	1.59	3.21	2.69	4.48	0.08	0.55	0.94	1.86	2.14	10.54	17.47	18.36	22.46	25.46		MORN5			MORN5::chr9:124922186/+:-000194820|TTLL11::chr9:124855884/-:0000128518|NDUFA8::chr9:124922097/-:0000194731
chr10:22904340-22910148	5808	genebody_intron	PIP4K2A	7.63	7.27	2.57	5.72	3.11	3.12	2.26	2.52	3.73	2.81	5.21	11.64	7.78	5.9	0.76	4.01	2.83	2.81	5.36	3.64	5.49	13.8	10.7	7.37			PIP4K2A		PIP4K2A::chr10:23003502/-:0000093354
chr18:8608698-8610152	1454	promotor	RAB12	-0.11	-0.51	2.12	1.6	1.19	1.34	1.56	1.12	1.19	1.33	0.04	0.17	-0.17	0.19	0.14	0.56	0.31	-0.05	12.58	10.11	4.96	2.51	3.62	5.25	RAB12	MTCL1			MTCL1::chr18:8717368/+:-000107216|MTCL1::chr18:8718421/+:-000108269|MTCL1::chr18:8717901/+:-000107749|RAB12::chr18:8609442/+:0000000000
chr2:233250006-233251103	1097	enhancer	EIF4E2|PRSS56|CHRNG|CHRND|ALPI|ALPPL2	0.94	0.27	1.38	0.56	0.01	0.08	1.23	0.52	0.22	0.05	0.29	0.58	0.05	0.13	0.66	0.95	0.26	0.17	0.67	0.48	2.02	2.38	-0.02	-0.11		EIF4E2|PRSS56|CHRNG|CHRND|ALPI|ALPPL2			ALPP::chr2:233243243/+:0000006763|PRSS56::chr2:233385172/+:-000134069|TIGD1::chr2:233415299/-:0000164196|EIF4E2::chr2:233415296/+:-000164193|CHRNG::chr2:233404436/+:-000153333|CHRND::chr2:233390869/+:-000139766|ECEL1::chr2:233352568/-:0000101465|ECEL1::chr2:233351463/-:0000100360|ALPI::chr2:233320821/+:-000069718|ALPPL2::chr2:233271551/+:-000020448
chr1:24151241-24152449	1208	promotor	HMGCL	0.55	1.01	1.84	0.8	0.98	1.02	0.65	0.58	0.72	1.21	0.06	0.05	-0.06	0.16	-0.21	0.17	0.02	0.14	17.96	14.07	7.5	5.96	5.41	7.26	HMGCL	PNRC2|GALE			CNR2::chr1:24239816/-:0000087367|CNR2::chr1:24202151/-:0000049702|PNRC2::chr1:24287929/+:-000135480|PNRC2::chr1:24287418/+:-000134969|PNRC2::chr1:24286300/+:-000133851|PITHD1::chr1:24104875/+:0000046366|HMGCL::chr1:24151948/-:0000000000|LYPLA2::chr1:24117645/+:0000033596|LYPLA2::chr1:24119146/+:0000032095|GALE::chr1:24127293/-:-000023948|GALE::chr1:24125501/-:-000025740|GALE::chr1:24127033/-:-000…
chr1:6549077-6562862	13785	promotor	PLEKHG5	16.43	4.96	6.51	2.01	2.01	1.68	6.5	3.25	1.83	4.41	0.72	-0.54	-0.94	-0.18	2.55	1.62	1.09	0.71	36.22	19.03	19.63	8.73	6	10.32	PLEKHG5	THAP3|PLEKHG5|PHF13|TAS1R1|TNFRSF25|ZBTB48|ACOT7|HES2		THAP3|ZBTB48|HES2	THAP3::chr1:6685209/+:-000122347|THAP3::chr1:6684924/+:-000122062|KLHL21::chr1:6662957/-:0000100095|ESPN::chr1:6484847/+:0000064230|PHF13::chr1:6673755/+:-000110893|PLEKHG5::chr1:6580120/-:0000017258|PLEKHG5::chr1:6551760/-:0000000000|PLEKHG5::chr1:6557483/-:0000000000|PLEKHG5::chr1:6550653/-:0000000000|PLEKHG5::chr1:6545528/-:-000003549|PLEKHG5::chr1:6557155/-:0000000000|PLEKHG5::chr1:6550639/-:…
chr18:45455849-45458450	2601	promotor	SMAD2	-0.46	-0.53	5.45	4.04	2.43	3.79	2.21	2.49	2.79	3.84	0.06	0.83	0.25	0.2	0.12	1.21	0.85	0.74	30.95	26.4	26.68	24.26	19.22	25.03	SMAD2	SMAD2		ZBTB7C|SMAD2	ZBTB7C::chr18:45567493/-:0000109043|ZBTB7C::chr18:45567493/-:0000109043|SMAD2::chr18:45423179/-:-000032670|SMAD2::chr18:45456969/-:0000000000|SMAD2::chr18:45457516/-:0000000000
chr4:166246632-166250711	4079	promotor	MSMO1	-0.51	0.73	3.91	2.36	1.75	2.93	2.89	1.66	2.52	3.98	4.25	6.85	7.72	6.92	0.69	1.06	1.29	2.66	38.03	27.11	15.55	6.74	6.95	14.49	MSMO1	MSMO1|CPE			MSMO1::chr4:166258940/+:-000008229|MSMO1::chr4:166248817/+:0000000000|MSMO1::chr4:166254491/+:-000003780|KLHL2::chr4:166159929/+:0000086703|KLHL2::chr4:166131170/+:0000115462|KLHL2::chr4:166141085/+:0000105547|KLHL2::chr4:166128769/+:0000117863|CPE::chr4:166300096/+:-000049385
chr4:141009497-141028248	18751	enhancer	SCOC	14.15	19.29	3.32	6.27	7.06	10.28	2.81	2.56	8.41	9.47	16.13	29.4	28.62	29.42	1.23	4.01	4.57	6.12	1.03	0.87	7.3	16.34	45.02	30.98		SCOC			SCOC::chr4:141178439/+:-000150191|SCOC::chr4:141178439/+:-000150191|MAML3::chr4:141075232/-:0000046984
chr12:19555231-19556806	1575	enhancer	AEBP2	2.46	0.55	4.23	1.51	0.19	0.38	1.49	0.48	0.27	0.12	2.7	1.97	1.21	0.7	1.39	1.23	0.39	-0.17	1.15	-0.05	6.57	0.73	-0.13	0.19		AEBP2			PLEKHA5::chr12:19407978/+:0000147253|PLEKHA5::chr12:19358258/+:0000196973|PLEKHA5::chr12:19406873/+:0000148358|PLEKHA5::chr12:19407978/+:0000147253|PLEKHA5::chr12:19358258/+:0000196973|PLEKHA5::chr12:19406873/+:0000148358|AEBP2::chr12:19593514/+:-000036708|AEBP2::chr12:19592607/+:-000035801
chr1:229325260-229328532	3272	enhancer	SPHAR|RAB4A	8.11	8.92	1.43	2.54	1.69	0.78	1.35	1.77	1.43	0.81	4.53	9.44	8.42	6.12	0.86	1.58	1.83	1.26	-0.25	-0.43	2.84	10.11	6.32	2.17		SPHAR|RAB4A			SPHAR::chr1:229440128/+:-000111596|RAB4A::chr1:229431594/+:-000103062|RAB4A::chr1:229406808/+:-000078276|CCSAP::chr1:229478687/-:0000150155|CCSAP::chr1:229478259/-:0000149727
chr10:135071102-135075856	4754	enhancer	PRAP1|PAOX|MTG1|ZNF511	12.78	8.79	3.85	1.58	2.48	3.87	1.83	0.83	2	3.81	1.81	3.93	3.85	5.98	-0.31	0.39	0.98	1.07	6.98	5.58	17.25	15.49	29.38	30.9		PRAP1|PAOX|MTG1|ZNF511		VENTX	UTF1::chr10:135043777/+:0000027325|CALY::chr10:135150474/-:0000074618|CALY::chr10:135142512/-:0000066656|ZNF511::chr10:135122392/+:-000046536|FUOM::chr10:135170965/-:0000095109|FUOM::chr10:135171528/-:0000095672|PAOX::chr10:135192740/+:-000116884|SPRN::chr10:135238120/-:0000162264|SPRN::chr10:135237200/-:0000161344|ADAM8::chr10:135090406/-:0000014550|MTG1::chr10:135207620/+:-000131764|ADGRA1::chr…
chr10:126124562-126125573	1011	enhancer	LHPP|OAT	1.97	1.4	0.53	1.06	0.1	0.15	0.66	0.64	0.5	0.48	3.83	5.11	2.55	3.02	0.4	0.01	-0.02	0.72	-0.2	0.14	0.19	-0.05	-0.11	0.07		LHPP|OAT			LHPP::chr10:126150340/+:-000024767|NKX1-2::chr10:126138549/-:0000012976|OAT::chr10:126100768/-:-000023794|OAT::chr10:126097533/-:-000027029|OAT::chr10:126107544/-:-000017018|OAT::chr10:126100768/-:-000023794|OAT::chr10:126097533/-:-000027029|OAT::chr10:126107544/-:-000017018
chr19:2456242-2496714	40472	promotor	LMNB2|GADD45B	33.22	31.12	30.25	28.07	17.24	20.91	28.14	15.29	22.17	34.15	13.51	15.58	12.25	14.43	4.38	6.72	2.19	8.33	110.95	101.75	98.11	54.2	40.26	77.02	LMNB2|GADD45B	LINGO3|LSM7|C19orf35|TIMM13|JSRP1			LMNB2::chr19:2456965/-:0000000000|LINGO3::chr19:2308155/-:-000148087|LINGO3::chr19:2291820/-:-000164422|LINGO3::chr19:2308155/-:-000148087|LINGO3::chr19:2291820/-:-000164422|GADD45B::chr19:2476122/+:0000000000|LSM7::chr19:2328613/-:-000127629|OAZ1::chr19:2269484/+:0000186758|C19orf35::chr19:2282180/-:-000174062|C19orf35::chr19:2280933/-:-000175309|GNG7::chr19:2520722/-:0000024008|GNG7::chr19:2646…
chr5:5585592-5586209	617	3 prime	ICE1	-0.06	-0.04	0.3	0.49	-0.06	-0.04	0.2	0.42	-0.02	-0.04	6.52	6.48	3.97	3.6	0.23	0.19	-0.03	0.02	0.25	0.07	0.25	0.16	-0.15	-0.02					ICE1::chr5:5422785/+:0000162807
chr7:17545564-17546400	836	genebody_intron	LOC101927630	-0.06	0.08	0.1	0.17	0.06	0.67	0.06	0.12	0.22	0.13	0.17	0.94	1.25	1.15	-0.16	-0.04	0.13	0.42	0.14	0.17	0.05	-0.12	0.56	0.51
chr12:83045146-83045909	763	enhancer	TMTC2	0.05	0.64	0.08	0.59	0.26	0.31	-0.28	-0.01	0.43	0.15	0.47	1.46	2.63	0.9	0.12	0.11	0.84	0.15	-0.04	0.01	-0.11	0.37	1.65	0.45		TMTC2			TMTC2::chr12:83080933/+:-000035024
chr8:125211513-125213308	1795	genebody_intron	LOC101927588	2.82	3.25	1.28	1.67	1.43	1.21	0.89	0.48	1.25	1.23	1.94	2.65	3.14	2.93	0.23	1.49	0.6	1.31	0.94	0.6	5.62	9.99	9.87	4.79					TMEM65::chr8:125384939/-:0000171631
chr17:62675567-62676530	963	enhancer	DDX5|POLG2|SMURF2	0.98	1.47	0.16	0.61	0.88	0.4	0.3	0.1	1.15	1.12	1.35	2.32	2.79	1.4	0.21	0.34	0.85	0.67	-0.1	0.39	0.94	2.69	3.14	1.1		DDX5|POLG2|SMURF2			DDX5::chr17:62502483/-:-000173084|POLG2::chr17:62493183/-:-000182384|SMURF2::chr17:62658385/-:-000017182|CEP95::chr17:62503157/+:0000172410
chr2:217437429-217438642	1213	enhancer	IGFBP2	1.33	0.32	1.36	1.31	0.89	1.15	0.55	0.21	0.87	0.31	0.49	0.86	0.64	0.54	0.43	1.17	0.93	0.59	0.02	0.15	0.22	0.1	1.59	0.69		IGFBP2			IGFBP2::chr2:217498126/+:-000059484|SMARCAL1::chr2:217278578/+:0000158851|SMARCAL1::chr2:217279369/+:0000158060|SMARCAL1::chr2:217277472/+:0000159957|SMARCAL1::chr2:217277136/+:0000160293|RPL37A::chr2:217363519/+:0000073910|IGFBP5::chr2:217560271/-:0000121629
chr2:8227183-8231889	4706	genebody_intron	LINC00299	6.74	5.42	2.54	2.51	3	1.53	3.36	2.83	4.24	3.11	5.64	12.2	11.27	6.13	0.78	2.2	2.71	1.35	0.21	0.16	4.46	14.26	18.32	6.57
chr12:115441656-115449165	7509	other		1.97	0.53	3.8	5.67	1.65	2.3	1.95	2.77	3.37	0.97	9.58	16.68	18.3	10.87	1.21	6.06	3.5	2.74	-0.32	-1.08	6.35	10.11	6.67	5.14
chr6:113702955-113703883	928	other		0.27	0.66	0.65	0.74	0.28	0.87	0.33	0.25	0.51	0.5	1.13	1.51	1.4	0.45	0.19	0.19	0.54	0.41	-0.34	-0.23	-0.01	0.3	0.9	0.6
chr10:63492126-63523197	31071	enhancer	ARID5B	6.79	5.58	36.13	12.95	1.21	3.67	10	6.48	3.19	1.69	15.19	27.71	4.43	4.7	6.08	12.3	1.33	4.46	-5.94	-5.64	57.97	69.38	12.18	7.48		ARID5B		ARID5B	ARID5B::chr10:63661012/+:-000137815|C10orf107::chr10:63422718/+:0000069408|C10orf107::chr10:63440900/+:0000051226
chr2:162015984-162022568	6584	promotor	TANK	0.94	0.8	5.51	3.7	2.47	3.93	4.18	2.16	4.24	3.03	14.71	20.53	20.61	17.13	1.6	1.34	0.83	0.63	24.4	19.65	16.57	13.37	15.25	15.04	TANK	PSMD14|TANK			PSMD14::chr2:162172947/+:-000150379|PSMD14::chr2:162164785/+:-000142217|PSMD14::chr2:162175332/+:-000152764|TANK::chr2:162036124/+:-000013556|TANK::chr2:161993465/+:0000022519|TANK::chr2:162016938/+:0000000000|TANK::chr2:162036124/+:-000013556|TANK::chr2:161993465/+:0000022519|TANK::chr2:162016938/+:0000000000
chr5:72859403-72862500	3097	promotor	ANKRA2|UTP15	-0.4	-0.43	2.89	1.56	1.52	2.23	1.55	0.67	1.01	2.15	-0.17	-0.16	-0.02	0.63	0.25	0.88	0.35	0.81	63.32	49.47	12.43	8.24	10.64	12.56	ANKRA2|UTP15	ARHGEF28|FOXD1			ARHGEF28::chr5:72980665/+:-000118165|ARHGEF28::chr5:72921982/+:-000059482|FOXD1::chr5:72744351/-:-000115052|ANKRA2::chr5:72861510/-:0000000000|ANKRA2::chr5:72858809/-:-000000594|UTP15::chr5:72865321/+:-000002821|UTP15::chr5:72866410/+:-000003910|UTP15::chr5:72861565/+:0000000000|UTP15::chr5:72864059/+:-000001559|UTP15::chr5:72864244/+:-000001744|UTP15::chr5:72863086/+:-000000586|BTF3::chr5:727942…
chr20:50419301-50428199	8898	promotor	SALL4	0.57	-0.03	2.63	2.81	0.38	-0.05	1.58	1.31	0.75	-0.48	9.74	24.34	19.42	6.66	1.74	3.29	1.1	0.22	-1.84	-1.47	1.15	4.13	0.38	-1.57	SALL4	ATP9A		SALL4	SALL4::chr20:50419047/-:-000000254|ATP9A::chr20:50384949/-:-000034352
chr15:78729519-78731525	2006	promotor	IREB2	-0.57	-0.53	4.09	1.61	2.09	3.08	1.8	1.12	1.64	2.35	-0.32	0.34	0.22	-0.01	0.32	0.92	0.43	0.5	33.3	28.59	14.21	11.89	12.74	13.96	IREB2	CHRNA5|PSMA4|HYKK|WDR61	HYKK		CRABP1::chr15:78632665/+:0000096854|DNAJA4::chr15:78558559/+:0000170960|DNAJA4::chr15:78556486/+:0000173033|DNAJA4::chr15:78556988/+:0000172531|CHRNA3::chr15:78913636/-:0000182111|CHRNA5::chr15:78857861/+:-000126336|PSMA4::chr15:78836531/+:-000105006|PSMA4::chr15:78834518/+:-000102993|PSMA4::chr15:78834246/+:-000102721|PSMA4::chr15:78832746/+:-000101221|HYKK::chr15:78805425/+:-000073900|HYKK::chr…
chr3:51571962-51573532	1570	promotor	RAD54L2	-0.39	-0.1	3.65	2.93	2.41	2.87	1.9	1.36	0.9	2.49	0.41	0.68	0.24	0.62	0.06	0.76	0.25	0.33	29.37	24.14	10.31	7.12	7.48	10.29	RAD54L2	TEX264|VPRBP|GRM2|RAD54L2			MANF::chr3:51422667/+:0000149295|TEX264::chr3:51705190/+:-000131658|TEX264::chr3:51708286/+:-000134754|TEX264::chr3:51706225/+:-000132693|TEX264::chr3:51705289/+:-000131757|TEX264::chr3:51706356/+:-000132824|RAD54L2::chr3:51624382/+:-000050850|RAD54L2::chr3:51575595/+:-000002063|RAD54L2::chr3:51624382/+:-000050850|RAD54L2::chr3:51575595/+:-000002063|RBM15B::chr3:51428698/+:0000143264|GRM2::chr3:5…
chr4:37687340-37688680	1340	promotor	RELL1	-0.64	-0.51	1.09	1.09	0.34	0.85	0.83	0.67	0.92	1.19	0.05	0.93	0.55	0.37	0.33	0.78	0.29	0.68	12.95	9.16	4.45	1.39	2.99	5.5	RELL1	PGM2			C4orf19::chr4:37559648/+:0000127692|C4orf19::chr4:37590467/+:0000096873|C4orf19::chr4:37585854/+:0000101486|C4orf19::chr4:37559648/+:0000127692|C4orf19::chr4:37590467/+:0000096873|C4orf19::chr4:37585854/+:0000101486|PGM2::chr4:37828281/+:-000139601|RELL1::chr4:37687998/-:0000000000
chr3:167451082-167454068	2986	promotor	PDCD10|SERPINI1	-2.08	-1.94	3.4	2.34	0.97	1.74	1.68	1.26	1.93	2.21	0.49	0.73	0.73	0.31	0.31	0.81	0.42	-0.08	55.31	38.59	16.35	9.83	7.87	12.67	PDCD10|SERPINI1	PDCD10|WDR49|SERPINI1			PDCD10::chr3:167438060/-:-000013022|PDCD10::chr3:167452137/-:0000000000|PDCD10::chr3:167443260/-:-000007822|PDCD10::chr3:167452650/-:0000000000|PDCD10::chr3:167452629/-:0000000000|PDCD10::chr3:167452593/-:0000000000|SERPINI1::chr3:167453510/+:0000000000|SERPINI1::chr3:167506898/+:-000052830|SERPINI1::chr3:167453431/+:0000000000|SERPINI1::chr3:167453510/+:0000000000|SERPINI1::chr3:167506898/+:-000…
chr1:19355411-19361160	5749	enhancer	TAS1R2|ALDH4A1	7.95	6.47	2.37	2.93	0.93	1.29	2.25	1.56	1.25	1.92	5.54	8.23	5.85	4.76	1.11	1.98	1.37	1.24	0.07	0.23	6.21	6.5	4.65	3.91		TAS1R2|ALDH4A1			TAS1R2::chr1:19186154/-:-000169257|ALDH4A1::chr1:19216598/-:-000138813|ALDH4A1::chr1:19217384/-:-000138027|ALDH4A1::chr1:19229292/-:-000126119|ALDH4A1::chr1:19215947/-:-000139464|UBR4::chr1:19536745/-:0000175585
chr1:110490245-110548386	58141	promotor	AHCYL1	44.84	27.21	29.73	24.36	7.28	25.32	16.62	13.55	11.04	15.22	38.56	62.79	41.47	37.84	8.27	14.06	9.64	17.02	48.12	38.24	93.09	100.07	94.81	92.38	AHCYL1	STRIP1|UBL4B|EPS8L3|SLC6A17		ALX3	STRIP1::chr1:110581304/+:-000032918|STRIP1::chr1:110580512/+:-000032126|STRIP1::chr1:110574198/+:-000025812|STRIP1::chr1:110577222/+:-000028836|AHCYL1::chr1:110544851/+:0000000000|AHCYL1::chr1:110551655/+:-000003269|AHCYL1::chr1:110546569/+:0000000000|AHCYL1::chr1:110543548/+:0000000000|AHCYL1::chr1:110527386/+:0000000000|ALX3::chr1:110613321/-:0000064935|CSF1::chr1:110453232/+:0000037013|UBL4B::…
chr3:30268148-30276590	8442	other		-0.16	4.41	2.66	0.05	3.04	16.13	-1.14	-1.59	4.25	6.84	7.41	11.13	19.4	18.05	-1.08	-0.06	3.07	7.72	-2.61	-1.19	0	-2.15	20.19	37.17
chr12:94116295-94137392	21097	genebody_exon	LOC101928731|LOC101928731	3.99	0.83	14.65	3.22	0	6.87	6.25	3.18	0.21	3.46	9.48	5.89	1.34	3.54	1.35	2.25	-0.03	0.51	10.07	11.08	34.51	26.42	9.24	22.57					CRADD::chr12:94071150/+:0000045145|CRADD::chr12:94072544/+:0000043751|SOCS2::chr12:93966460/+:0000149835|SOCS2::chr12:93964174/+:0000152121|SOCS2::chr12:93964756/+:0000151539|SOCS2::chr12:93965456/+:0000150839|SOCS2::chr12:93963597/+:0000152698|SOCS2::chr12:93966301/+:0000149994
chr3:150037288-150038417	1129	enhancer	TSC22D2	0.37	0.56	0.57	0.94	0.86	0.29	0.97	0.39	0.89	0.38	2.91	5.3	5.59	4.11	0.3	0.26	0.42	0.37	-0.35	-0.52	2.16	5.57	3.01	1.2		TSC22D2		TSC22D2	TSC22D2::chr3:150126121/+:-000087704
chr6:52403016-52417384	14368	enhancer	TMEM14A	18.32	7.17	5.56	3.32	0.92	0.29	8.35	3.09	0.77	1.91	7.62	7.16	3.05	1.48	2.17	3	0.46	1.14	3.81	-1.88	20.22	7.53	1.75	1.84		TMEM14A			PAQR8::chr6:52226925/+:0000176091|PAQR8::chr6:52267959/+:0000135057|EFHC1::chr6:52288484/+:0000114532|EFHC1::chr6:52284993/+:0000118023|EFHC1::chr6:52285804/+:0000117212|TRAM2::chr6:52441861/-:0000024477|TMEM14A::chr6:52541884/+:-000124500|TMEM14A::chr6:52535883/+:-000118499
chr1:219691725-219692688	963	other		0.44	0.14	0.17	0.92	0.59	0.49	0.11	0.33	0.81	0.26	1.71	4.56	3.27	1.77	0.18	1.1	0.56	1.31	0.05	0.19	-0.32	0.07	-0.07	0.08
chr3:180319098-180320845	1747	promotor	TTC14	-0.28	0.23	3.64	2.54	0.83	1.99	1.59	1.26	1.28	0.95	2.67	4.49	3.64	3.49	0.76	1.02	0.36	0.74	29.97	22.75	7.25	5.39	5.22	6.06	TTC14				TTC14::chr3:180319917/+:0000000000|CCDC39::chr3:180397282/-:0000076437
chr18:53456472-53458389	1917	enhancer	TCF4	2.53	1.85	2.35	0.56	0.35	0.3	0.82	0.3	0.21	0.4	0.94	0.93	0.2	0.23	0.31	0.88	0.36	0.25	-0.38	-0.03	8.11	8.25	1.69	0.93		TCF4		TCF4	TCF4::chr18:53303223/-:-000153249|TCF4::chr18:53257044/-:-000199428|TCF4::chr18:53303223/-:-000153249|TCF4::chr18:53257044/-:-000199428
chr6:81974306-81975983	1677	other		0.76	-0.01	1.3	0.55	0.14	0.78	0.25	0.25	0.24	0	1.19	0.99	0.57	0.96	0.37	0.91	0.29	0.22	1.26	0.65	3.64	5.27	3.35	2.9
chr10:74927041-74928684	1643	promotor	ECD|FAM149B1	-0.79	-0.61	2.24	1.47	1.49	1.25	1.65	1.18	1.38	2.47	-0.06	0.19	0.16	0.77	0.3	0.34	0.11	0.16	37.62	30.76	11.12	6.44	6.01	9.79	ECD|FAM149B1	P4HA1			ECD::chr10:74923707/-:-000003334|ECD::chr10:74927852/-:0000000000|DNAJC9::chr10:75007088/-:0000078404|NUDT13::chr10:74870132/+:0000056909|NUDT13::chr10:74879208/+:0000047833|NUDT13::chr10:74883971/+:0000043070|NUDT13::chr10:74879775/+:0000047266|NUDT13::chr10:74874114/+:0000052927|NUDT13::chr10:74884875/+:0000042166|NUDT13::chr10:74881932/+:0000045109|MRPS16::chr10:75012450/-:0000083766|P4HA1::ch…
chr19:4399453-4403174	3721	promotor	CHAF1A|SH3GL1	-0.32	-0.64	3.49	3.43	3.08	3.53	2.94	3.17	2.62	4.51	3.18	5.4	4.59	5.84	1.32	1.45	0.58	0.82	40.9	39.66	16.64	13.77	14.98	22.94	CHAF1A|SH3GL1	HDGFRP2|TMIGD2|STAP2			FSD1::chr19:4304590/+:0000094863|MPND::chr19:4343523/+:0000055930|HDGFRP2::chr19:4472192/+:-000069018|UBXN6::chr19:4457790/-:0000054616|UBXN6::chr19:4455294/-:0000052120|UBXN6::chr19:4454089/-:0000050915|CCDC94::chr19:4247110/+:0000152343|SH3GL1::chr19:4400564/-:0000000000|SH3GL1::chr19:4400414/-:0000000000|STAP2::chr19:4338846/-:-000060607|CHAF1A::chr19:4402659/+:0000000000|TMIGD2::chr19:4302427…
chr8:33210181-33211706	1525	enhancer	MAK16	1.08	0.73	1.93	2.35	0.71	0.58	1.48	1.63	0.94	0.93	16.08	24.45	20.6	12.33	1.05	1.73	1.13	0.83	1.55	0.28	0.06	0.04	0.16	0.08		MAK16			FUT10::chr8:33319242/-:0000107536|FUT10::chr8:33330663/-:0000118957|MAK16::chr8:33342684/+:-000130978|TTI2::chr8:33370229/-:0000158523|TTI2::chr8:33370702/-:0000158996
chr2:189061095-189065149	4054	enhancer	GULP1	0.31	0.11	3.61	1.06	-0.13	-0.1	2	0.97	0.43	0.38	4.16	5.42	1.39	0.8	0.97	1.46	0.46	0.08	-0.67	-0.71	3.56	2.99	-0.13	-0.07		GULP1			GULP1::chr2:189156395/+:-000091246|GULP1::chr2:189248489/+:-000183340|GULP1::chr2:189156395/+:-000091246|GULP1::chr2:189248489/+:-000183340
chr2:57387875-57388666	791	other		0.28	0.37	0.01	0.53	0.31	0.21	-0.08	0.24	0.65	0.18	0.08	0.99	1.19	0.76	0.04	0.31	0.3	0.66	-0.13	0.09	-0.13	0.2	0	-0.01
chr4:55391448-55392559	1111	enhancer	KIT	1.1	0.87	1.07	1.5	0.36	0.63	0.87	0.53	0.61	0.62	1.64	3.33	1.21	1.27	0.49	0.88	0.39	0.49	-0.06	0.07	0.66	3.06	1.59	0.73		KIT	KIT		KIT::chr4:55524094/+:-000131535
chr9:15696448-15698386	1938	enhancer	PSIP1	0.68	0.75	2.8	0.84	0.83	1.4	1.32	0.72	1.3	1	1.53	3.75	3.55	2.19	0.39	1.04	0.67	0.81	0.27	0.22	9.33	12.79	9.18	3.41		PSIP1			CCDC171::chr9:15563975/+:0000132473|CCDC171::chr9:15553096/+:0000143352|PSIP1::chr9:15510326/-:-000186122|PSIP1::chr9:15511002/-:-000185446|PSIP1::chr9:15510323/-:-000186125|PSIP1::chr9:15510286/-:-000186162
chr5:54828992-54831974	2982	promotor	PPAP2A	3.42	3	6.16	5.86	2.56	3.28	3.43	2.54	2.87	4.22	1.47	3.02	1.62	1.92	1.17	1.9	0.15	0.22	60.03	41.17	26.96	25.6	19.82	21.85	PPAP2A				SLC38A9::chr5:54968522/-:0000136548|SLC38A9::chr5:54965447/-:0000133473|SLC38A9::chr5:55007326/-:0000175352|SLC38A9::chr5:55008162/-:0000176188|SLC38A9::chr5:54993819/-:0000161845|SLC38A9::chr5:54988880/-:0000156906|SLC38A9::chr5:54987119/-:0000155145|SLC38A9::chr5:54965706/-:0000133732|SLC38A9::chr5:54968522/-:0000136548|SLC38A9::chr5:54965447/-:0000133473|SLC38A9::chr5:55007326/-:0000175352|SLC…
chr5:121593470-121596536	3066	enhancer	LOX|SNCAIP	3.29	1.38	2.84	2.95	1.26	0.68	3.11	1.61	1.13	1	5.35	11.07	7.71	5.2	1.74	3.49	1.26	0.81	0.14	0.06	6.4	9.69	1	0.47		LOX|SNCAIP			LOX::chr5:121414054/-:-000179416|LOX::chr5:121412917/-:-000180553|SNCAIP::chr5:121726783/+:-000130247|SNCAIP::chr5:121647819/+:-000051283|SNCAIP::chr5:121726783/+:-000130247|SNCAIP::chr5:121647819/+:-000051283|LOC100505841::chr5:121495870/+:0000097600|ZNF474::chr5:121487473/+:0000105997|ZNF474::chr5:121465207/+:0000128263
chr6:38606530-38608476	1946	promotor	BTBD9	0	0.34	1.78	1.09	0.75	0.99	1.34	1.33	0.94	1.02	0.42	0.79	0.13	0.5	0.39	1.01	0.5	0.48	33.71	18.54	9.13	8.73	6.64	6.74	BTBD9	DNAH8|BTBD9			GLO1::chr6:38670951/-:0000062475|DNAH8::chr6:38683116/+:-000074640|DNAH8::chr6:38690551/+:-000082075|BTBD9::chr6:38562102/-:-000044428|BTBD9::chr6:38565896/-:-000040634|BTBD9::chr6:38607923/-:0000000000|BTBD9::chr6:38563842/-:-000042688|BTBD9::chr6:38562150/-:-000044380|BTBD9::chr6:38580808/-:-000025722|BTBD9::chr6:38562102/-:-000044428|BTBD9::chr6:38565896/-:-000040634|BTBD9::chr6:38607923/-:000…
chr1:27097585-27098846	1261	enhancer	NUDC|ZDHHC18|SFN|PIGV	3.24	2.88	0.14	1.16	0.88	0.23	0.84	0.21	0.87	0.72	0.11	0.58	0.65	0.03	-0.03	0.55	0.53	-0.09	-0.02	0.04	0.28	0.89	1.82	0.51		NUDC|ZDHHC18|SFN|PIGV		NR0B2|ARID1A	NR0B2::chr1:27240566/-:0000141720|ARID1A::chr1:27022521/+:0000075064|NUDC::chr1:27248212/+:-000149366|ZDHHC18::chr1:27153200/+:-000054354|KDF1::chr1:27278902/-:0000180056|KDF1::chr1:27286900/-:0000188054|SFN::chr1:27189632/+:-000090786|GPN2::chr1:27216868/-:0000118022|PIGV::chr1:27117249/+:-000018403|PIGV::chr1:27114453/+:-000015607|PIGV::chr1:27114678/+:-000015832|GPATCH3::chr1:27226961/-:000012…
chr19:49201189-49202213	1024	promotor	FUT2	1.54	1.1	1.36	0.42	-0.16	0.33	0.66	0.12	-0.06	0.6	0.43	-0.03	-0.18	-0.02	0.41	0.32	-0.06	0.23	-0.13	0.06	2.65	1.55	0.38	0.9	FUT2	NTN5|CA11|PPP1R15A|DBP|RPL18|FAM83E|FGF21		TULP2|DBP	SPACA4::chr19:49109999/+:0000091190|PPP1R15A::chr19:49376481/+:-000174268|PPP1R15A::chr19:49375648/+:-000173435|RASIP1::chr19:49243542/-:0000041329|RASIP1::chr19:49243969/-:0000041756|SULT2B1::chr19:49055428/+:0000145761|SULT2B1::chr19:49078992/+:0000122197|HSD17B14::chr19:49339933/-:0000137720|SPHK2::chr19:49130948/+:0000070241|SPHK2::chr19:49122789/+:0000078400|SPHK2::chr19:49122547/+:000007864…
chrX:15360930-15361958	1028	enhancer	PIGA|ASB11|ASB9|BMX	0.95	-0.05	1.54	0.47	0.11	0.09	1.04	0.43	0	0.5	6.96	5.01	2.23	2.63	0.52	0.61	0.24	0.3	0.21	-0.07	1.07	0.37	-0.09	-0.12		PIGA|ASB11|ASB9|BMX	BMX		FIGF::chrX:15402534/-:0000040576|ASB11::chrX:15333745/-:-000027185|ASB11::chrX:15332680/-:-000028250|PIGA::chrX:15350113/-:-000010817|PIGA::chrX:15353675/-:-000007255|ASB9::chrX:15288292/-:-000072638|ASB9::chrX:15288588/-:-000072342|ASB9::chrX:15288130/-:-000072800|BMX::chrX:15518899/+:-000156941|BMX::chrX:15526467/+:-000164509|BMX::chrX:15525430/+:-000163472|PIR::chrX:15511710/-:0000149752|PIR::…
chr17:36857681-36862689	5008	promotor	MLLT6	1.32	1.88	5.08	4.11	2.88	6.09	3.76	3.3	3.43	5.57	-0.76	0.19	1.09	0.74	0.77	1.97	0.42	1.19	48.09	42.85	23.17	19.03	20.29	31.03	MLLT6	CISD3|C17orf96|LASP1|PSMB3|SRCIN1	PIP4K2B		CISD3::chr17:36886509/+:-000023820|PCGF2::chr17:36904223/-:0000041534|PCGF2::chr17:36904557/-:0000041868|PCGF2::chr17:36896694/-:0000034005|PCGF2::chr17:36904223/-:0000041534|PCGF2::chr17:36904557/-:0000041868|PCGF2::chr17:36896694/-:0000034005|MLLT6::chr17:36861872/+:0000000000|C17orf96::chr17:36831186/-:-000026495|RPL23::chr17:37010052/-:0000147363|LASP1::chr17:37034338/+:-000171649|LASP1::chr1…
chr1:231493316-231494330	1014	enhancer	TSNAX|LOC149373|C1orf131|EXOC8	1.07	0.92	0.64	0.43	0.27	0.37	0.49	0.05	0.7	0.22	1.5	1.45	0.84	1.1	0.55	0.12	0.15	0.24	-0.12	0.09	0.34	0.51	0.35	0.09		TSNAX|LOC149373|C1orf131|EXOC8			EGLN1::chr1:231560789/-:0000066459|TSNAX::chr1:231664398/+:-000170068|SPRTN::chr1:231473681/+:0000019635|EXOC8::chr1:231473617/-:-000019699|GNPAT::chr1:231376918/+:0000116398|C1orf131::chr1:231376932/-:-000116384|LOC149373::chr1:231323372/-:-000169944|TRIM67::chr1:231298673/+:0000194643
chr10:5359000-5360171	1171	enhancer	UCN3|NET1	0.77	1.95	0.07	0.24	0.97	0.63	0.33	0.08	0.76	1.35	-0.31	0.34	0.98	0.46	0.02	1	0.69	0.59	-0.39	-0.25	0.18	2.98	8.72	3.55		UCN3|NET1			AKR1C4::chr10:5238797/+:0000120203|UCN3::chr10:5415677/+:-000055506|UCN3::chr10:5406975/+:-000046804|TUBAL3::chr10:5446792/-:0000086621|NET1::chr10:5454513/+:-000094342|NET1::chr10:5488513/+:-000128342|CALML5::chr10:5541532/-:0000181361
chr1:204455942-204486440	30498	promotor	PIK3C2B|MDM4	7.16	6.54	8.28	9.29	5.28	6.22	3.6	2.99	4.36	6.24	18.97	31.98	30.96	26.01	2.27	2.76	1.21	2.16	51.29	37.19	9.94	12.06	9.99	17.51	PIK3C2B|MDM4	PIK3C2B|PLEKHA6|PPP1R15B|MDM4			PIK3C2B::chr1:204459058/-:0000000000|PIK3C2B::chr1:204439013/-:-000016929|PIK3C2B::chr1:204459473/-:0000000000|PLEKHA6::chr1:204329056/-:-000126886|PLEKHA6::chr1:204329056/-:-000126886|PPP1R15B::chr1:204380944/-:-000074998|MDM4::chr1:204494611/+:-000008171|MDM4::chr1:204485506/+:0000000000|LRRN2::chr1:204654596/-:0000168156|LRRN2::chr1:204652124/-:0000165684|LRRN2::chr1:204589345/-:0000102905|LRR…
chr22:41214725-41216245	1520	promotor	SLC25A17	2.05	0.98	0.8	0.72	0.54	1.23	0.71	0.77	0.37	1.27	0.51	1.48	1.47	1.11	0	0.34	0.18	0.09	16.9	14.61	4.21	2.77	3.37	4.74	SLC25A17	MKL1|SLC25A17|RBX1|XPNPEP3			DNAJB7::chr22:41258129/-:0000041884|MKL1::chr22:41032722/-:-000182003|MCHR1::chr22:41075181/+:0000139544|ST13::chr22:41253011/-:0000036766|SLC25A17::chr22:41193339/-:-000021386|SLC25A17::chr22:41215402/-:0000000000|SLC25A17::chr22:41195086/-:-000019639|SLC25A17::chr22:41193339/-:-000021386|SLC25A17::chr22:41215402/-:0000000000|SLC25A17::chr22:41195086/-:-000019639|RBX1::chr22:41347350/+:-00013110…
chr15:79602914-79604387	1473	promotor	TMED3	-0.15	0.14	1.68	0.97	0.98	1.2	1.17	1.3	0.9	1.53	0.01	0.38	0.26	0.19	0.14	0.87	0.09	0.69	28.73	21.81	6.04	6.82	6.89	7.1	TMED3	KIAA1024			KIAA1024::chr15:79748439/+:-000144052|KIAA1024::chr15:79724857/+:-000120470|TMED3::chr15:79603403/+:0000000000|ANKRD34C::chr15:79575145/+:0000027769|ANKRD34C::chr15:79585582/+:0000017332
chr2:160372365-160373602	1237	enhancer	BAZ2B|MARCH7	-0.52	0.01	1.12	0.87	0.36	0.46	0.54	0.81	0.63	0.05	0.04	0.62	0.23	0.29	0.25	0.78	0.27	0.45	2.31	2.08	2.88	3.69	2.43	2.58		BAZ2B|MARCH7		BAZ2B	BAZ2B::chr2:160412375/-:0000038773|BAZ2B::chr2:160473111/-:0000099509|BAZ2B::chr2:160335231/-:-000037134|BAZ2B::chr2:160412375/-:0000038773|BAZ2B::chr2:160473111/-:0000099509|BAZ2B::chr2:160335231/-:-000037134|MARCH7::chr2:160572191/+:-000198589|MARCH7::chr2:160568967/+:-000195365|MARCH7::chr2:160571067/+:-000197465
chr20:17890432-17892156	1724	enhancer	MGME1	3.23	0.41	0.5	1.15	0.39	-0.12	1.01	0.42	0.73	-0.1	1.36	1.3	0.62	0.35	0.37	0.97	0.67	-0.1	0.05	-0.35	0.64	0.81	0.29	-0.24		MGME1		OVOL2	BANF2::chr20:17705667/+:0000184765|BANF2::chr20:17703360/+:0000187072|BANF2::chr20:17705667/+:0000184765|BANF2::chr20:17703360/+:0000187072|MGME1::chr20:17950443/+:-000058287|MGME1::chr20:17949761/+:-000057605|SNX5::chr20:17936118/-:0000043962|SNX5::chr20:17937680/-:0000045524|SNX5::chr20:17949633/-:0000057477|SNX5::chr20:17934760/-:0000042604|SNX5::chr20:17949436/-:0000057280|SNX5::chr20:1794909…
chr5:146749058-146750076	1018	genebody_intron	STK32A	-0.13	0.34	0.62	0.5	0.45	0.3	0.36	0.12	0.3	0.26	0.4	0.32	0.19	0.12	0.41	0.28	0.23	0.17	-0.27	-0.31	-0.06	0.02	0.12	0.08			STK32A		STK32A::chr5:146619101/+:0000129957|STK32A::chr5:146614578/+:0000134480|DPYSL3::chr5:146833259/-:0000083183|DPYSL3::chr5:146889618/-:0000139542
chr12:16004642-16017231	12589	enhancer	DERA|EPS8|STRAP	2.72	1.55	6.24	3.89	1.79	4.33	1.83	2.21	3.42	4.06	10.23	15.87	15.47	12.39	1.02	2.52	1.65	1.42	-2.27	-2.4	8.28	7.86	8.21	7.39		DERA|EPS8|STRAP			EPS8::chr12:15942509/-:-000062133|EPS8::chr12:15835905/-:-000168737|EPS8::chr12:15942509/-:-000062133|EPS8::chr12:15835905/-:-000168737|DERA::chr12:16064105/+:-000046874|STRAP::chr12:16035287/+:-000018056
chr10:975793-978500	2707	promotor	LARP4B	-1.02	-1.6	2.82	2.08	0.7	1.59	1.83	1.03	1.93	2	-0.31	-0.33	-0.33	-0.19	0.04	0.34	0.52	0.06	35.16	28.2	14.28	9.95	11.34	13.42	LARP4B	GTPBP4|WDR37|LARP4B			GTPBP4::chr10:1034348/+:-000055848|IDI2::chr10:1070683/-:0000092183|IDI2::chr10:1071798/-:0000093298|LARP4B::chr10:931699/-:-000044094|LARP4B::chr10:977644/-:0000000000|WDR37::chr10:1118055/+:-000139555|WDR37::chr10:1102775/+:-000124275|IDI1::chr10:1095060/-:0000116560
chr2:189801599-189803276	1677	enhancer	DIRC1|COL3A1	0.05	-0.05	2.38	1.57	0.67	0.72	0.56	1	0.3	0.25	4.56	7.11	6.1	4.34	0.45	1.06	0.39	0.47	-0.08	-0.2	1.87	3	1.72	0.91		DIRC1|COL3A1			DIRC1::chr2:189654830/-:-000146769|COL3A1::chr2:189839098/+:-000035822
chr4:39977398-39993620	16222	promotor	PDS5A	3.71	1.36	7.17	4.12	1.5	3.37	1.49	2.77	2.78	3.72	11.03	18.8	11.68	10.6	0.41	1.56	0.09	0.56	27.9	23.14	22.62	16.44	15.68	22.88	PDS5A	RHOH|N4BP2			RHOH::chr4:40192630/+:-000199010|PDS5A::chr4:39979575/-:0000000000|PDS5A::chr4:39978236/-:0000000000|N4BP2::chr4:40075074/+:-000081454|N4BP2::chr4:40098846/+:-000105226|N4BP2::chr4:40058523/+:-000064903
chr2:161762556-161798075	35519	enhancer	TANK	0.77	-2.98	33.3	5.99	2.88	8.46	9.11	3.75	4.96	4.19	17.69	18.96	12.66	10.54	4.56	4.62	4.23	4.13	-5.6	-3.7	26.41	12.59	11.87	6.61		TANK			TANK::chr2:161993465/+:-000195390
chrX:13082273-13150606	68333	enhancer	FAM9C	13.01	30.71	18.91	13.16	13.61	43.4	2.83	2.24	19.68	20.77	44.97	66.73	74.98	59.57	-0.22	6.07	11.27	17.99	-16.25	-9.34	30.04	45.46	107.97	90.98		FAM9C			TLR8::chrX:12924738/+:0000157535|TLR8::chrX:12928424/+:0000153849|FAM9C::chrX:13062916/-:-000019357|FAM9C::chrX:13061975/-:-000020298|ATXN3L::chrX:13338517/-:0000187911|TLR7::chrX:12885599/+:0000196674|TLR7::chrX:12885201/+:0000197072|TMSB4X::chrX:12994364/+:0000087909|TMSB4X::chrX:12993225/+:0000089048
chr6:83420902-83423057	2155	3 prime	UBE3D	1.28	-0.19	2.08	0.94	-0.15	0.01	1.39	0.73	-0.06	0.67	5.22	5.85	0.94	0.33	1.18	0.79	0.19	0.34	1.51	-0.38	3.49	4.12	0.19	-0.27
chr7:135193630-135195479	1849	promotor	CNOT4	-0.85	-0.83	1.42	1.63	1.43	1.65	1.36	1.14	1.02	2.42	0.93	1.15	0.19	1.22	0.43	0.36	0.26	0.62	40.7	30.74	9.93	6.52	4.92	7.75	CNOT4	C7orf73|NUP205|CNOT4			C7orf73::chr7:135347220/+:-000151741|NUP205::chr7:135242661/+:-000047182|CNOT4::chr7:135123170/-:-000070460|CNOT4::chr7:135194874/-:0000000000
chr11:63952252-63954383	2131	promotor	STIP1	0.2	0.64	2.56	2.04	1.98	2.37	2.74	1.88	1.83	3.17	0.27	0.55	0.54	0.29	0.46	1.06	0.63	0.66	37	34.6	14.38	5.43	8.74	17.65	STIP1	RPS6KA4|PLCB3|ESRRA|FKBP2|DNAJC4|PRDX5|CCDC88B|TEX40|FERMT3|GPR137|KCNK4|MACROD1|VEGFB|NUDT22	RPS6KA4	ESRRA	TRMT112::chr11:64085555/-:0000131172|RPS6KA4::chr11:64126624/+:-000172241|PLCB3::chr11:64018994/+:-000064611|ESRRA::chr11:64074639/+:-000120256|ESRRA::chr11:64073698/+:-000119315|ESRRA::chr11:64072999/+:-000118616|MACROD1::chr11:63933584/-:-000018668|DNAJC4::chr11:63997752/+:-000043369|DNAJC4::chr11:63997903/+:-000043520|PPP1R14B::chr11:64014412/-:0000060029|CCDC88B::chr11:64107689/+:-000153306|V…
chr2:47284896-47307790	22894	enhancer	MCFD2	35.9	18.8	10.51	10.39	6.98	8.25	10.81	5.93	7.51	10.04	9.06	14.26	12.11	6.33	2.68	5.82	4.26	3.7	0.35	0.4	56.87	76.17	74.02	46.22		MCFD2			MCFD2::chr2:47135107/-:-000149789|MCFD2::chr2:47168993/-:-000115903|MCFD2::chr2:47143006/-:-000141890|MCFD2::chr2:47143250/-:-000141646|MCFD2::chr2:47136315/-:-000148581|MCFD2::chr2:47138011/-:-000146885|C2orf61::chr2:47382516/-:0000074726|CALM2::chr2:47403761/-:0000095971|CALM2::chr2:47389800/-:0000082010|CALM2::chr2:47404074/-:0000096284|CALM2::chr2:47401345/-:0000093555|CALM2::chr2:47397902/-:…
chr6:48047742-48048502	760	enhancer	PTCHD4	0.11	0.01	0.52	0.61	0.64	0.17	0.46	0.35	0.38	-0.08	0.62	1.99	1.4	0.96	0.35	0.58	0.64	0.52	-0.29	0.1	-0.05	0.06	0.35	-0.06		PTCHD4			PTCHD4::chr6:48036424/-:-000011318
chr12:51156913-51159740	2827	promotor	ATF1	0.87	0.24	4.91	4.13	3.28	3.57	1.9	2.78	3.12	2.99	1.62	3.41	2.4	2.25	-0.08	0.81	0.63	0.77	39.88	31.72	18.49	16.37	17.75	17.37	ATF1	TMPRSS12|ATF1|METTL7A		ATF1	TMPRSS12::chr12:51236700/+:-000076960|ATF1::chr12:51157788/+:0000000000|ATF1::chr12:51173922/+:-000014182|METTL7A::chr12:51318533/+:-000158793
chr10:31202167-31203683	1516	promotor	ZNF438	0.72	0.79	0.22	0.42	0.17	0.98	0.4	0.47	0.54	0.71	1.27	1.9	1.39	1.07	0.4	0.34	0.65	0.53	-0.16	-0.26	2.15	2.15	2.99	2.24	ZNF438	ZNF438			ZNF438::chr10:31139295/-:-000062872|ZNF438::chr10:31199368/-:-000002799|ZNF438::chr10:31212343/-:0000008660|ZNF438::chr10:31230579/-:0000026896|ZNF438::chr10:31164437/-:-000037730|ZNF438::chr10:31273354/-:0000069671|ZNF438::chr10:31197943/-:-000004224|ZNF438::chr10:31320865/-:0000117182|ZNF438::chr10:31288445/-:0000084762|ZNF438::chr10:31146706/-:-000055461|ZNF438::chr10:31165993/-:-000036174|ZNF…
chr5:170518723-170519928	1205	genebody_intron	RANBP17	1.42	0.73	0.79	0.85	0.02	0.04	0.56	0.55	0.27	0.24	0.73	0.78	0.09	0.42	0.37	0.44	0.26	0.37	0.19	0.26	3.54	5.57	1.47	1.37
chr5:124379193-124380046	853	genebody_intron	LOC101927421	0.36	0.33	0.44	0.77	0.11	-0.17	0.1	0.16	-0.08	-0.02	0.11	0.47	0.08	-0.04	0.28	0.27	0.01	0.04	0.59	0.22	0.71	0.86	-0.09	-0.11
chr10:33403235-33404222	987	enhancer	ITGB1	1.1	1	0.24	1.42	0.58	0.34	0.34	0.41	1.25	0.44	7.17	12.04	12.91	9.97	0.19	0.53	0.5	0.66	0.45	0.31	-0.07	0.65	0.16	-0.29		ITGB1			ITGB1::chr10:33246821/-:-000156414|ITGB1::chr10:33247292/-:-000155943
chr2:19546681-19548437	1756	genebody_exon	MIR4757	0.07	0.26	2.5	2.21	1.1	1.61	1.71	1.41	1.75	2.25	2.09	3.75	3.1	3.02	0.4	1.04	0.46	0.55	19.78	14.79	15.46	12.21	8.61	10.22				OSR1	OSR1::chr2:19553597/-:0000005160|OSR1::chr2:19558371/-:0000009934
chr3:145853956-145855168	1212	genebody_intron	PLOD2	0.38	-0.05	0.4	1.21	0.45	0.14	0.31	0.51	0.4	0.28	3.41	10.67	8.08	3.51	0.25	0.87	0.52	0.33	-0.16	-0.13	-0.02	-0.05	-0.32	0.07					PLOD2::chr3:145879281/-:0000024113|PLSCR4::chr3:145938711/-:0000083543|PLSCR4::chr3:145968423/-:0000113255|PLSCR4::chr3:145939878/-:0000084710|PLSCR4::chr3:145968650/-:0000113482|PLSCR4::chr3:145968965/-:0000113797|PLSCR4::chr3:145941563/-:0000086395
chr6:7424361-7424949	588	enhancer	SSR1|SNRNP48|CAGE1|DSP	0.33	0.22	0.12	0.49	0.32	0.08	0	0.24	0.18	0.09	2.15	2.53	1.8	0.79	0.08	0.09	0.19	0.04	0.15	0.05	0	0.01	-0.13	-0.02		SSR1|SNRNP48|CAGE1|DSP	RIOK1		SSR1::chr6:7313546/-:-000110815|SNRNP48::chr6:7590431/+:-000165482|RIOK1::chr6:7390061/+:0000034300|RIOK1::chr6:7402879/+:0000021482|RIOK1::chr6:7390061/+:0000034300|RIOK1::chr6:7402879/+:0000021482|CAGE1::chr6:7389941/-:-000034420|CAGE1::chr6:7387428/-:-000036933|CAGE1::chr6:7379252/-:-000045109|CAGE1::chr6:7386104/-:-000038257|DSP::chr6:7541869/+:-000116920
chr16:163046-164187	1141	promotor	NPRL3	4.03	3.59	0.83	1.01	0.74	0.69	0.99	0.61	1.17	0.88	0.05	0.22	0.61	0.29	0.42	0.83	0.8	0.73	0.91	0.6	8.64	12.66	11.15	4.97	NPRL3	HBM|ITFG3|HBQ1|PDIA2|RHBDF1|ARHGDIG|HBZ|HBA1|HBA2|POLR3K			HBM::chr16:215972/+:-000051785|MPG::chr16:129423/+:0000033623|MPG::chr16:127017/+:0000036029|MPG::chr16:129137/+:0000033909|MPG::chr16:128168/+:0000034878|ITFG3::chr16:299547/+:-000135360|ITFG3::chr16:304379/+:-000140192|ITFG3::chr16:304386/+:-000140199|ITFG3::chr16:284544/+:-000120357|ITFG3::chr16:299547/+:-000135360|ITFG3::chr16:304379/+:-000140192|ITFG3::chr16:304386/+:-000140199|ITFG3::chr16:…
chr2:204645652-204680723	35071	enhancer	CTLA4|ICOS	5.66	16.63	18.31	0.79	20.03	71.79	4.01	-1.23	17.97	23.62	11.18	12.46	35.35	28.47	-1.49	-3.52	11.12	14.2	-9.99	-6.12	26.17	2.93	127.86	122.51		CTLA4|ICOS			CTLA4::chr2:204732510/+:-000051787|ICOS::chr2:204801470/+:-000120747|CD28::chr2:204571197/+:0000074455
chr5:33890437-33895839	5402	promotor	ADAMTS12	4.31	4.84	3.69	3.08	2.94	3.92	1.76	0.85	2.77	3.79	4.23	4.66	5.35	4.09	1.33	1.95	2.06	2.49	30.69	36.51	9.48	11.47	17.99	13.22	ADAMTS12	RXFP3			AMACR::chr5:34008219/-:0000112380|RXFP3::chr5:33936490/+:-000040651|ADAMTS12::chr5:33892123/-:0000000000|SLC45A2::chr5:33984779/-:0000088940|C1QTNF3::chr5:34043370/-:0000147531
chr11:44971472-44973017	1545	promotor	TP53I11	0.12	0.09	1.19	0.35	0.6	0.57	0.73	-0.18	0.32	0.06	-0.5	-0.22	-0.43	-0.04	0.2	0.09	-0.27	0.2	9.01	4.27	2.67	0.58	0.81	2.02	TP53I11	TP53I11|PRDM11			TP53I11::chr11:44959916/-:-000011556|TP53I11::chr11:44972607/-:0000000000|TP53I11::chr11:44971758/-:0000000000|TP53I11::chr11:44960831/-:-000010641|TP53I11::chr11:44962297/-:-000009175|TP53I11::chr11:44972856/-:0000000000|TP53I11::chr11:44960740/-:-000010732|TP53I11::chr11:44962598/-:-000008874|TP53I11::chr11:44962627/-:-000008845|TSPAN18::chr11:44927957/+:0000043515|TSPAN18::chr11:44881878/+:000…
chr4:166731744-166751089	19345	enhancer	TLL1	0.4	1.32	6.49	6.24	1.31	0.35	3.1	4.36	0.72	-0.24	2.08	8.96	1.44	-1.06	1.33	5.41	1.73	0.63	-4.24	-5.16	13.18	40.61	9.09	1.79		TLL1			TLL1::chr4:166794409/+:-000043320
chr11:113745643-113747075	1432	promotor	USP28	-0.47	-0.13	1.31	1.04	0.81	1.22	1	1.19	0.99	1.46	0.29	0.01	0.25	0.17	-0.01	0.07	0.07	0.24	9.01	8.07	4.45	4.09	2.87	4.8	USP28	ZBTB16|USP28|TMPRSS5|HTR3B|HTR3A|ZW10		ZBTB16	ZBTB16::chr11:113930430/+:-000183355|ZBTB16::chr11:113931287/+:-000184212|ZBTB16::chr11:113933932/+:-000186857|HTR3A::chr11:113848221/+:-000101146|HTR3A::chr11:113845796/+:-000098721|TMPRSS5::chr11:113570414/-:-000175229|TMPRSS5::chr11:113577094/-:-000168549|TMPRSS5::chr11:113570889/-:-000174754|HTR3B::chr11:113775517/+:-000028442|USP28::chr11:113746291/-:0000000000|USP28::chr11:113711478/-:-0000…
chr19:18302340-18304745	2405	promotor	MPV17L2	0.37	0.05	2.27	0.9	0.1	1.3	1.47	1.95	1.08	1.96	1.51	2.08	1.36	1.57	0.63	1.06	0.14	0.72	22.39	20.77	10.1	4.28	4.73	8.18	MPV17L2	IL12RB1|PGPEP1|GDF15		JUND	KIAA1683::chr19:18380396/-:0000075651|KIAA1683::chr19:18385318/-:0000080573|KIAA1683::chr19:18378374/-:0000073629|MPV17L2::chr19:18304039/+:0000000000|IL12RB1::chr19:18197812/-:-000104528|IL12RB1::chr19:18209625/-:-000092715|IL12RB1::chr19:18197812/-:-000104528|IL12RB1::chr19:18209625/-:-000092715|JUND::chr19:18392465/-:0000087720|IFI30::chr19:18284589/+:0000017751|PGPEP1::chr19:18451396/+:-00014…
chr15:48622726-48624991	2265	promotor	DUT	-0.38	-0.75	3.88	2.56	2.27	4.47	1.73	1.67	2	3.81	0.17	0.82	0.52	1.08	0.38	0.88	0.06	0.69	37.84	36.43	14.67	8.72	10.46	20.69	DUT	MYEF2			SLC12A1::chr15:48498497/+:0000124229|SLC12A1::chr15:48499730/+:0000122996|DUT::chr15:48624464/+:0000000000|DUT::chr15:48623620/+:0000000000|DUT::chr15:48624364/+:0000000000|MYEF2::chr15:48470557/-:-000152169|CTXN2::chr15:48493440/+:0000129286|CTXN2::chr15:48483866/+:0000138860
chr6:119766717-119768684	1967	enhancer	MAN1A1	2.54	1.12	1.83	2.7	0.6	1.04	0.83	1.22	1.34	0.5	4.48	9.49	5.14	3.54	0.51	1.58	0.63	0.39	0.68	-0.03	4.03	7.72	1.59	0.41		MAN1A1			MAN1A1::chr6:119670451/-:-000096266|MAN1A1::chr6:119670930/-:-000095787
chr6:160798699-160822913	24214	enhancer	SLC22A2	23.2	13.92	23.98	18.73	3.78	2.14	10.3	7.45	3.5	2.04	19.8	35.63	15.92	9.38	8.04	15.45	4.77	3.23	-1.8	-3.86	70.22	105.57	22.77	14.68		SLC22A2			SLC22A2::chr6:160679962/-:-000118737|SLC22A3::chr6:160769404/+:0000029295
chr6:26268954-26332389	63435	enhancer	BTN3A2|BTN3A3|BTN3A1|HIST1H1T|BTN1A1|HIST1H2BG|HIST1H3F|BTN2A2|HIST1H3D|HIST1H2AD|HIST1H1D|BTN2A1	0.07	7.28	44.86	39.81	53.97	82.31	15.01	9.22	38.76	80.22	19.89	25.35	25.09	39.88	5.03	2.98	2.4	12.32	218.53	198.29	111.25	42.36	50.22	143.2		BTN3A2|BTN3A3|BTN3A1|HIST1H1T|BTN1A1|HIST1H2BG|HIST1H3F|BTN2A2|HIST1H3D|HIST1H2AD|HIST1H1D|BTN2A1			HIST1H2BD::chr6:26158348/+:0000110606|BTN3A2::chr6:26368202/+:-000035813|BTN3A2::chr6:26368405/+:-000036016|BTN3A2::chr6:26365386/+:-000032997|BTN3A2::chr6:26368792/+:-000036403|BTN3A2::chr6:26368217/+:-000035828|BTN3A3::chr6:26443609/+:-000111220|BTN3A3::chr6:26444184/+:-000111795|BTN3A3::chr6:26440699/+:-000108310|BTN3A3::chr6:26443868/+:-000111479|BTN3A3::chr6:26443797/+:-000111408|BTN3A1::chr…
chr13:75793555-75801979	8424	3 prime	TBC1D4	1.88	0.7	4.67	1.45	1.88	1.71	2.47	1.94	1.75	2.47	8.81	7.38	7.01	7.46	1.19	0.27	0.92	2.28	1.71	0.1	12.3	7.11	5.18	2.62
chr2:202121946-202126875	4929	promotor	CASP8	3.58	3.92	5.11	3.37	3.1	6.83	1.39	2.32	3.38	4.67	3.15	7.02	6.21	5.25	0.45	1.14	1.13	1.91	26.83	25.64	29.53	34.26	42.53	41.35	CASP8	STRADB|FAM126B	STRADB		TRAK2::chr2:202285428/-:0000158553|TRAK2::chr2:202316318/-:0000189443|TRAK2::chr2:202285428/-:0000158553|TRAK2::chr2:202316318/-:0000189443|NDUFB3::chr2:201943603/+:0000178343|NDUFB3::chr2:201936461/+:0000185485|NDUFB3::chr2:201937061/+:0000184885|CASP8::chr2:202122753/+:0000000000|CASP8::chr2:202131183/+:-000004308|CASP8::chr2:202125222/+:0000000000|CASP8::chr2:202098165/+:0000023781|CASP8::chr2…
chr15:34393382-34395132	1750	promotor	PGBD4|EMC7	-0.55	-0.4	2.28	1.95	1.42	1.89	2.33	1.39	1.47	1.64	0.41	1.12	0.98	0.53	0.64	1.28	0.66	0.44	30.09	25.26	7.93	6.95	7.88	7.81	PGBD4|EMC7	AVEN|EMC4			PGBD4::chr15:34394273/+:0000000000|AVEN::chr15:34331302/-:-000062080|KATNBL1::chr15:34455890/-:0000060758|KATNBL1::chr15:34502296/-:0000107164|KATNBL1::chr15:34455890/-:0000060758|KATNBL1::chr15:34502296/-:0000107164|CHRM5::chr15:34354843/+:0000038539|CHRM5::chr15:34338740/+:0000054642|CHRM5::chr15:34261088/+:0000132294|CHRM5::chr15:34354843/+:0000038539|CHRM5::chr15:34338740/+:0000054642|CHRM5::…
chr2:216419202-216420030	828	enhancer	FN1	-0.26	0.4	-0.15	-0.11	0.64	0.67	-0.19	-0.02	0.92	1.05	-0.15	0.14	2.18	1.19	-0.33	-0.12	0.56	0.55	-0.42	-0.23	-0.43	-0.33	2.07	1.13		FN1			FN1::chr2:216300790/-:-000118412
[truncated: 25,925 more rows]
