# Supplementary material for: Enhancer Remodeling during Adaptive Bypass to MEK Inhibition Is Attenuated by Pharmacologic Targeting of the P-TEFb Complex
Source: Oxford University Press journal article supplement (doi:10.1158/2159-8290.cd-16-0653), 2017-01-21
Supplement: 21598290cd160653-sup-167758_3_supp_3815480_9j9v99.xlsx [file 21598290cd160653-sup-167758_3_supp_3815480_9j9v99.xlsx]

## Sheet: Common
GeneName	dbSNP	Effect	Effect2	Chr	Position	Ref	Alt	Mutation	MAF	Qscore	UNCseq ActionLevel	CosmicOverlaps	CosmicMutations	Coordinate	Transcript	CosmicIDs	Domain
KRAS	rs121913529	MODERATE	NON_SYNONYMOUS_CODING	chr12	25398284	C	T	p.Gly12Asp	0.611765	816	2A	17061	p.G12D|p.G12V|p.G12A|p.G12fs*3|p.G12N|p.G12D|p.G12_G13insAG|p.G12_G13insAG|p.G12Y|p.G12E|p.G12I|p.G12W|p.G12F|p.G12C|p.G12L|p.G12V|p.G12E|p.G12V|p.G12D|p.G12A	chr12:25398284	ENST00000557334	COSM1135366,COSM1140133,COSM1140134,COSM12657,COSM13643,COSM14209,COSM1562185,COSM1562186,COSM25081,COSM30566,COSM34144,COSM36281,COSM512,COSM513,COSM514,COSM515,COSM519,COSM520,COSM521,COSM522
TP53	rs121913343	MODERATE	NON_SYNONYMOUS_CODING	chr17	7577121	G	A	p.Arg273Cys	1	963	2B	576	p.R273C|p.?|p.0?|p.R273fs*32|p.R273fs*32|p.V272>?|p.R273S|p.?|p.0?|p.0?|p.0?|p.R273G|p.R273S|p.L265_K305del41|p.E271_R273delEVR|p.R273_C275delRVC|p.R273fs*33|p.F270_D281del12|p.E258fs*71|p.R273fs*72|p.R273S|p.V272_K292del21|p.S269fs*21|p.R273fs*71|p.R273fs*33|p.F270fs*72|p.R273C	chr17:7577121	ENST00000455263	COSM10659,COSM13748,COSM18654,COSM304198,COSM304199,COSM417970,COSM417971,COSM43307,COSM43308,COSM43309,COSM43310,COSM43843,COSM43909,COSM44208,COSM44258,COSM44314,COSM44324,COSM44348,COSM44423,COSM44701,COSM44858,COSM44895,COSM45163,COSM45354,COSM45427,COSM45787,COSM99933
ZNF717		MODERATE	CODON_CHANGE_PLUS_CODON_DELETION	chr3	75786314	CCTACATTCT	C	p.X817Lys	0.578947	2125		43	p.E818_R820delECR	chr3:75786314	ENST00000422325	COSM1425319
ORAI1		MODERATE	CODON_DELETION	chr12	122064773	CCCGCCA	C	p.X43X	1	1006		42	p.P43_P44delPP	chr12:122064773	ENST00000330079	COSM430547
GPRIN2		MODERATE	CODON_INSERTION	chr10	46999591	C	CATGAGGGAG	p.X238X	0.333333	503		35	p.G237_M238insMRE	chr10:46999591	ENST00000374317	COSM427580
MUC4	rs73891106	MODERATE	NON_SYNONYMOUS_CODING	chr3	195508537	A	G	p.Val3305Ala	1	501		35	p.D3293_G3324del32|p.V3305A|p.V3305_S3336del32|p.V3305_S3320del16	chr3:195508537	ENST00000475231	COSM1421901,COSM149576,COSM150885,COSM150886
HYDIN		MODERATE	CODON_DELETION	chr16	70954703	GGCGCTCCTTCTCCGT	G	p.X2521X	0.375	1666		33	p.T2472M|p.T151M|p.T2472L|p.T151L|p.T2520_R2524delTEKER|p.T2472_R2476delTEKER|p.T151_R155delTEKER|p.K2522R|p.K2474R|p.K153R|p.T2520P|p.T2472P|p.T151P	chr16:70954703	ENST00000393567	COSM116262,COSM116263,COSM133486,COSM133487,COSM1379438,COSM1379439,COSM1379440,COSM1379441,COSM1379442,COSM1379443,COSM1379444,COSM86533,COSM86534
KIT	rs3822214	MODERATE	NON_SYNONYMOUS_CODING	chr4	55593464	A	C	p.Met541Leu	0.705128	500	2A	32	p.M541V|p.M541L	chr4:55593464	ENST00000288135	COSM1430137,COSM28026	Transmembrane_region
ZNF384		MODERATE	CODON_CHANGE_PLUS_CODON_DELETION	chr12	6777069	TTGC	T	p.X514Gln	0.540541	950		28	p.L139delL|p.L139delL|p.Q514Q|p.Q453Q|p.L126L|p.L126L|p.Q516delQ|p.Q455delQ	chr12:6777069	ENST00000396801	COSM1133963,COSM1133964,COSM1363815,COSM1363816,COSM1363817,COSM1363818,COSM431726,COSM431727
FAM71E2	rs28712579	MODERATE	NON_SYNONYMOUS_CODING	chr19	55869903	T	C	p.Gln778Arg	1	264		28	p.Q778P|p.Q434P|p.Q778_E785delQPWGEMKE|p.Q434_E441delQPWGEMKE	chr19:55869903	ENST00000424985	COSM1190158,COSM1190159,COSM1396564,COSM1396565
NCOR2		MODERATE	CODON_INSERTION	chr12	124887058	G	GGCT	p.X81Ser	0.791667	743		26	p.Q510_P511insS|p.Q510_P511insS|p.Q510_P511insQ|p.Q510_P511insQ	chr12:124887058	ENST00000404121	COSM1171882,COSM1171883,COSM1476307,COSM1476308
TP53	rs1042522	MODERATE	NON_SYNONYMOUS_CODING	chr17	7579472	G	C	p.Pro72Arg	1	486	2B	26	p.R72fs*51|p.0?|p.R72P|p.0?|p.0?|p.0?|p.D48fs*55|p.G59fs*23|p.P13fs*18|p.R72H|p.R65fs*38|p.R72fs*51|p.S33fs*23|p.D57_A76del20|p.E68fs*76|p.R72fs*51	chr17:7579472	ENST00000455263	COSM12660,COSM18654,COSM250061,COSM43308,COSM43309,COSM43310,COSM45359,COSM45377,COSM45593,COSM45985,COSM46046,COSM46058,COSM46089,COSM46324,COSM96585,COSM96586
FAM71E2	rs28420516	MODERATE	NON_SYNONYMOUS_CODING	chr19	55869892	C	T	p.Glu782Lys	1	182		26	p.Q778_E785delQPWGEMKE|p.Q434_E441delQPWGEMKE	chr19:55869892	ENST00000424985	COSM1396564,COSM1396565
GOLGA6L2		MODERATE	CODON_INSERTION	chr15	23686010	T	TCTC	p.Glu537X	0.307692	570		21	p.E537_K538insE|p.E537_K538insE|p.E537_K538insE	chr15:23686010	ENST00000567107	COSM1477984,COSM1477985,COSM1477986
FRG1B	rs7266938	MODERATE	NON_SYNONYMOUS_CODING	chr20	29625877	G	A	p.Ala46Thr	0.533019	687		18	p.A41T|p.A41T	chr20:29625877	ENST00000439954	COSM419013,COSM419014
MED15		MODERATE	CODON_DELETION	chr22	20920813	ACAG	A	p.Gln56X	0.241379	260		18	p.Q250_Q251insQ|p.Q250_Q251insQ|p.Q251Q|p.Q251Q|p.Q260_Q262delQQQ|p.Q260_Q262delQQQ	chr22:20920813	ENST00000542773	COSM111968,COSM111969,COSM1414977,COSM1414978,COSM1484083,COSM1484084
NCOA3		MODERATE	CODON_DELETION	chr20	46279836	ACAG	A	p.Gln1255X	0.540541	1940		17	p.Q1255delQ|p.Q1255Q	chr20:46279836	ENST00000371998	COSM128730,COSM1565740
IFI27		MODERATE	CODON_INSERTION	chr14	94582130	T	TGGCCATGGC	p.Val45X	0.5	1111		16	p.A43_V44insMAA	chr14:94582130	ENST00000448882	COSM433527
TMEM37		MODERATE	CODON_CHANGE_PLUS_CODON_INSERTION	chr2	120194651	A	AGTGTGC	p.Thr82X	0.259259	318		15	p.T70>SVP	chr2:120194651	ENST00000409826	COSM112142
PRKRA		HIGH	FRAME_SHIFT	chr2	179315734	GGC	G	c.21*>-GC	0.162162	178		15	p.A8fs*22	chr2:179315734	ENST00000325748	COSM1010052
DENND4B		MODERATE	CODON_DELETION	chr1	153907278	CCTGCTGCTG	C	p.X908X	0.463415	837		14	p.Q908_Q910delQQQ|p.Q796_Q798delQQQ	chr1:153907278	ENST00000361217	COSM1319934,COSM1319935
KRTAP4-7		MODERATE	CODON_DELETION	chr17	39240781	CCTGCTGCCGCCCCAG	C	p.X108Thr	0.322034	803		13	p.S113C|p.P112P|p.S113_P117delSCCRP|p.?|p.R111R|p.?|p.S113C|p.?|p.R111_C115delRPSCC|p.R111H|p.?	chr17:39240781	ENST00000391417	COSM1128717,COSM1128718,COSM1323977,COSM1323978,COSM1479546,COSM1479547,COSM1521062,COSM219727,COSM219728,COSM436552,COSM436553
MST1L		HIGH	SPLICE_SITE_ACCEPTOR	chr1	17087541	GGTGCT	G		0.37037	1847		12	p.Q40fs*18|p.?|p.H41fs*19|p.?	chr1:17087541	ENST00000389184	COSM1317622,COSM1317623,COSM1472976,COSM1472977
GOLGA6L6	rs57050697	MODERATE	NON_SYNONYMOUS_CODING	chr15	20739885	T	C	p.Gln622Arg	1	186		12	p.Q622_I635del14	chr15:20739885	ENST00000427390	COSM1371988
CTU2		HIGH	FRAME_SHIFT	chr16	88780634	AGGTGTG	A	c.1096*>-GGTGTG	1	824		12	p.?|p.T367fs*4|p.T367fs*4|p.?	chr16:88780634	ENST00000312060	COSM1380438,COSM1479162,COSM1479163,COSM974742
BCL6B		MODERATE	CODON_INSERTION	chr17	6928019	C	CCAG	p.Ser234X	0.764706	725		12	p.S244_E245insS|p.S244_E245insS	chr17:6928019	ENST00000293805	COSM983707,COSM983708
ALPK2		MODERATE	CODON_CHANGE_PLUS_CODON_DELETION	chr18	56204387	ACAGTTGATGTGTCCT	A	p.X1006Val	1	1172		12	p.E1006_T1010delEDTST|p.?|p.T1008K|p.?	chr18:56204387	ENST00000361673	COSM1163660,COSM1163661,COSM403722,COSM403723
ANTXR2	rs12647691	MODERATE	NON_SYNONYMOUS_CODING	chr4	80905990	C	G	p.Ala357Pro	0.964286	634		12	p.A357fs*52|p.A357fs*52	chr4:80905990	ENST00000403729	COSM1431287,COSM1431288
CYP21A2		MODERATE	CODON_DELETION	chr6	32006214	CCTG	C	p.Leu6X	0.60396	3008		12	p.L10delL	chr6:32006214	ENST00000478281	COSM1077762
OMG	rs11080149	MODERATE	NON_SYNONYMOUS_CODING	chr17	29623288	C	T	p.Gly21Asp	0.524194	499	2A	11	p.0?|p.?|p.?|p.?|p.0?	chr17:29623288	ENST00000247271	COSM27386,COSM43283,COSM43287,COSM43288,COSM43289
GOLGA6L2		MODERATE	CODON_CHANGE_PLUS_CODON_DELETION	chr15	23685825	ATCT	A	p.X598Asp	0.344	1926		10	p.E598delE|p.E598delE	chr15:23685825	ENST00000567107	COSM1477980,COSM1477981
FAM174B		MODERATE	CODON_CHANGE_PLUS_CODON_DELETION	chr15	93198678	TTGGAGC	T	p.X69Asn	1	1525		10	p.S69_S70delSS	chr15:93198678	ENST00000327355	COSM1167521	Extracellular
C19orf55		HIGH	FRAME_SHIFT	chr19	36258937	AG	A	c.1190*>-G	1	493		10	p.A398fs*24	chr19:36258937	ENST00000396908	COSM995220
GGT1	rs201313233	MODERATE	NON_SYNONYMOUS_CODING	chr22	25023893	G	A	p.Ser84Asn	0.632653	270		10	p.S428N	chr22:25023893	ENST00000404920	COSM137241
FNDC1		MODERATE	CODON_DELETION	chr6	159660779	GCCACCACCCGCCGCACGA	G	p.X1471Ala	0.454545	203		9	p.T1479_T1484delTRRTTT|p.T1477A|p.R1474_T1479delRRTTTT	chr6:159660779	ENST00000297267	COSM1441915,COSM1441916,COSM236633
KRT1		MODERATE	CODON_DELETION	chr12	53069222	CACCTCCGGAGCCGTAGCTGCT	C	p.X557X	1	2463		8	p.S557_G563delSSYGSGG|p.S557_G563delSSYGSGG	chr12:53069222	ENST00000252244	COSM1362564,COSM245335
ATXN3	rs12895357	MODERATE	NON_SYNONYMOUS_CODING	chr14	92537354	C	G	p.Gly315Arg	1	451		8	p.Q305_G306>R|p.G306R	chr14:92537354	ENST00000545170	COSM1371592,COSM318869
RIN3		MODERATE	CODON_DELETION	chr14	93154537	TGGC	T	p.Gly967X	0.970588	1713		8	p.G972delG	chr14:93154537	ENST00000216487	COSM958885
DKFZP686J19100		HIGH	FRAME_SHIFT	chr16	81242148	GTT	G	c.705*>-TT	0.365854	507		8	p.N236fs*26|p.N236fs*26	chr16:81242148	ENST00000337114	COSM314177,COSM314178
FAM171B		MODERATE	CODON_INSERTION	chr2	187559029	A	ACAG,ACAGCAG	p.X44Gln	0.705882	752		8	p.Q56_K57insQQ|p.Q56_K57insQ	chr2:187559029	ENST00000304698	COSM1326590,COSM1403934
IGSF3	rs647711	MODERATE	NON_SYNONYMOUS_CODING	chr1	117122288	G	C	p.Asp1040Glu	0.428571	73		6	p.D1040E|p.D1020E|p.E1039_D1040insE|p.E1019_D1020insE	chr1:117122288	ENST00000369483	COSM1333058,COSM1333059,COSM1333060,COSM1333061
HRNR		HIGH	FRAME_SHIFT	chr1	152195728	AT	A	c.0*>-T	0.926829	660		6	p.?|p.M1L	chr1:152195728	ENST00000368801	COSM111478,COSM311856
SERINC2		MODERATE	CODON_INSERTION	chr1	31905889	A	ACAG	p.X373Gln	0.226415	554		6	p.Q368_V369insQ	chr1:31905889	ENST00000373710	COSM1317544
B3GNT6		HIGH	FRAME_SHIFT	chr11	76751603	CT	C	c.1005*>-T	1	1028		6	p.L337fs*19	chr11:76751603	ENST00000354301	COSM1357067
PABPC3		HIGH	FRAME_SHIFT	chr13	25671097	A	AT	p.X254X	0.482759	1549		6	p.K254fs*24	chr13:25671097	ENST00000281589	COSM392292
SYNM		HIGH	SPLICE_SITE_ACCEPTOR	chr15	99646107	A	AG		1	3012		6	p.A235fs*39|p.A235fs*39	chr15:99646107	ENST00000328642	COSM1375607,COSM1375608
LLGL2	rs1661715	MODERATE	NON_SYNONYMOUS_CODING	chr17	73567846	C	T	p.Pro759Ser	0.525641	305		6	p.P759S|p.P759S	chr17:73567846	ENST00000577200	COSM1480007,COSM437389
RNF213	rs9674961	MODERATE	NON_SYNONYMOUS_CODING	chr17	78319136	G	A	p.Ser407Asn	0.987654	1000		6	p.S407N|p.S2383N	chr17:78319136	ENST00000336301	COSM148366,COSM148367
ANKRD30BL	rs111770980	MODERATE	NON_SYNONYMOUS_CODING	chr2	132905741	G	A	p.Thr247Met	0.555556	229		6	p.T247M|p.T247M	chr2:132905741	ENST00000409867	COSM1293941,COSM1293942
GIGYF2	rs3816334	MODERATE	NON_SYNONYMOUS_CODING	chr2	233708806	A	G	p.Thr823Ala	0.728395	523		6	p.Q1005delQ|p.Q984delQ|p.Q1001Q|p.Q980Q	chr2:233708806	ENST00000452341	COSM1406291,COSM1406292,COSM1406293,COSM1406294
AAK1		MODERATE	CODON_CHANGE_PLUS_CODON_DELETION	chr2	69741753	CTGT	C	p.X541Gln	0.933333	1320		6	p.Q541Q|p.Q541Q|p.Q546delQ|p.Q546delQ	chr2:69741753	ENST00000409085	COSM1022429,COSM1022430,COSM1318883,COSM1318884
ANKRD36C		HIGH	FRAME_SHIFT	chr2	96521244	GTTTT	G	c.1841*>-TTTT	0.184524	488		6	p.Q1589fs*11|p.Q840fs*11|p.Q840fs*11	chr2:96521244	ENST00000419039	COSM1269804,COSM1269805,COSM1269806
OR5H6		MODERATE	CODON_DELETION	chr3	97983487	TTGTAACCAC	T	p.X120Leu	1	2702		6	p.V124_T126delVTT	chr3:97983487	ENST00000383696	COSM1163649
SYNE1	rs4645434	MODERATE	NON_SYNONYMOUS_CODING	chr6	152665261	C	A	p.Glu4060Asp	0.433333	213		6	p.E4060D|p.E3989D|p.E4060D	chr6:152665261	ENST00000367255	COSM136573,COSM1441465,COSM42924	Cytoplasmic
MICA		HIGH	FRAME_SHIFT	chr6	31380160	TG	T	c.951*>-G	0.358491	686		6	p.G318fs*>15|p.G318fs*>16	chr6:31380160	ENST00000449934	COSM1443269,COSM451203
ODF1		MODERATE	CODON_DELETION	chr8	103573010	CTGCAACCCCTGCAGCCCCTGCAACCCG	C	p.X218X	0.967742	1539		6	p.C218_P226delCNPCSPCNP|p.S216_C224delSPCNPCSPC	chr8:103573010	ENST00000285402	COSM330203,COSM391390
TNFRSF11B	rs2073618	MODERATE	NON_SYNONYMOUS_CODING	chr8	119964052	G	C	p.Asn3Lys	0.284211	123		6	p.N3K|p.N3K	chr8:119964052	ENST00000297350	COSM1488949,COSM453917
USP20		MODERATE	CODON_DELETION	chr9	132630664	TGAC	T	p.Asp358X	0.571429	552		6	p.D359delD|p.D359delD|p.D359delD	chr9:132630664	ENST00000372429	COSM1105893,COSM1105894,COSM1105896
NDOR1	rs113809617	MODERATE	NON_SYNONYMOUS_CODING	chr9	140100317	C	G	p.Arg30Gly	0.513514	166		6	p.R30G|p.R30G	chr9:140100317	ENST00000458322	COSM1235562,COSM1235563
CTBP2		HIGH	FRAME_SHIFT	chr10	126727614	CA	C	c.8*>-A	0.338462	787		5	p.V4fs*23	chr10:126727614	ENST00000337195	COSM1346604
PHLDA1		MODERATE	CODON_CHANGE_PLUS_CODON_DELETION	chr12	76424937	TTGC	T	p.X53Gln	1	1702		5	p.Q204delQ	chr12:76424937	ENST00000602540	COSM1476940
WDR73		MODERATE	CODON_CHANGE_PLUS_CODON_DELETION	chr15	85186876	ACTTGGCTCCGTGTTCCAT	A	p.X315Val	0.333333	705		5	p.D315_Q320delDGTRSQ|p.G316R	chr15:85186876	ENST00000434634	COSM1375060,COSM434452
SIRPA		MODERATE	CODON_CHANGE_PLUS_CODON_DELETION	chr20	1896051	CCGA	C	p.X129Pro	0.192308	159		5	p.D131delD|p.P129P|p.D130A	chr20:1896051	ENST00000400068	COSM128735,COSM315198,COSM315199
ZNF717		HIGH	FRAME_SHIFT	chr3	75786035	G	GA	p.X863X	0.555556	494		5	p.*915fs?	chr3:75786035	ENST00000478296	COSM1425315
ZNF717		HIGH	FRAME_SHIFT	chr3	75787044	A	AATGACTT	p.X527X	0.4	822		5	p.F577>*	chr3:75787044	ENST00000478296	COSM1425331
ZNF717		HIGH	FRAME_SHIFT	chr3	75787645	GAA	G	c.1105*>-AA	0.480519	1312		5	p.F376fs*3	chr3:75787645	ENST00000400845	COSM236333
KLHDC9	rs11576830	MODERATE	NON_SYNONYMOUS_CODING	chr1	161068836	A	C	p.Ser171Arg	0.464286	124		4	p.S171R|p.S171R	chr1:161068836	ENST00000392192	COSM424364,COSM424365
CDK11A		MODERATE	CODON_INSERTION	chr1	1647893	C	CTTTCTT	p.X93X	0.395349	2776		4	p.E128_R129insKE|p.E116_R117insKE	chr1:1647893	ENST00000378638	COSM1335905,COSM1335906
OBSCN	rs1188710	MODERATE	NON_SYNONYMOUS_CODING	chr1	228528563	C	G	p.Gln6848Glu	0.541667	218		4	p.Q6603E|p.Q5891E	chr1:228528563	ENST00000570156	COSM1473554,COSM1473555
OSCP1	rs34409118	MODERATE	NON_SYNONYMOUS_CODING	chr1	36898067	T	C	p.Thr86Ala	0.325581	110		4	p.T131A|p.T141A	chr1:36898067	ENST00000433045	COSM1342321,COSM83893
SMPD1		MODERATE	CODON_DELETION	chr11	6411935	TGCTGGC	T	p.X36Val	1	565		4	p.L35fs*38|p.L35fs*38|p.V36_L39delVLAL|p.V36_L39delVLAL	chr11:6411935	ENST00000527275	COSM1236735,COSM1236736,COSM1475711,COSM1475712
CNTN5	rs10790978	MODERATE	NON_SYNONYMOUS_CODING	chr11	99690286	T	G	p.Ser23Ala	1	397		4	p.S23A|p.S23A	chr11:99690286	ENST00000528682	COSM1476010,COSM430127
TDG		HIGH	FRAME_SHIFT	chr12	104373728	G	GA	p.X92X	0.285714	731		4	p.I98fs*6|p.I98fs*6	chr12:104373728	ENST00000266775	COSM112087,COSM1237697
ACIN1	rs941719	MODERATE	NON_SYNONYMOUS_CODING	chr14	23549379	C	G	p.Ala447Pro	1	725		4	p.A447fs*19	chr14:23549379	ENST00000555053	COSM238662
RP11-124D2.6		MODERATE	CODON_CHANGE_PLUS_CODON_DELETION	chr14	23744800	ACAT	A	p.X547Val	0.764706	610		4	p.D545fs*2|p.D521fs*2|p.D545delD|p.D521delD	chr14:23744800	ENST00000561013	COSM432882,COSM432883,COSM954649,COSM954650
SLC28A1		MODERATE	CODON_CHANGE_PLUS_CODON_INSERTION	chr15	85438311	C	CTTG	p.Leu62X	0.987952	3070		4	p.L140_K141insV|p.L140_K141insV	chr15:85438311	ENST00000537703	COSM308704,COSM308705
NPIPL3	rs143579045	MODERATE	NON_SYNONYMOUS_CODING	chr16	22545897	G	T	p.Lys531Asn	0.502024	673		4	p.K531N|p.K531N	chr16:22545897	ENST00000517539	COSM1478652,COSM1478653
KRTAP9-2		MODERATE	CODON_DELETION	chr17	39383322	ACTGCTGCCAGCC	A	p.X139Asn	0.354167	757		4	p.Q142_C145delQPCC	chr17:39383322	ENST00000377721	COSM1383113
GRIN2C	rs3744215	MODERATE	NON_SYNONYMOUS_CODING	chr17	72838649	C	A	p.Arg1209Ser	1	1322		4	p.R1209S|p.R1209S	chr17:72838649	ENST00000293190	COSM1479974,COSM437337	Cytoplasmic
FDXR	rs690514	MODERATE	NON_SYNONYMOUS_CODING	chr17	72862593	C	T	p.Arg79Gln	1	580		4	p.R123Q|p.R123Q	chr17:72862593	ENST00000455107	COSM1479985,COSM437343
ANKLE1	rs8100241	MODERATE	NON_SYNONYMOUS_CODING	chr19	17392894	G	A	p.Ala85Thr	1	193		4	p.A31T|p.A17T	chr19:17392894	ENST00000433424	COSM438893,COSM438894
HS6ST1	rs61738292	MODERATE	NON_SYNONYMOUS_CODING	chr2	129075877	G	T	p.Asp87Glu	0.389831	112		4	p.D87E	chr2:129075877	ENST00000259241	COSM1481920	Lumenal
POTEE		MODERATE	NON_SYNONYMOUS_CODING	chr2	132021946	G	A	p.Gly973Asp	0.5	90		4	p.G973D	chr2:132021946	ENST00000356920	COSM1318183
ALS2CR8		HIGH	FRAME_SHIFT	chr2	203848307	C	CA	p.X611X	0.753086	1652		4	p.T716fs*5|p.T716fs*>10	chr2:203848307	ENST00000414439	COSM1404623,COSM1404624
BARD1	rs1048108	MODERATE	NON_SYNONYMOUS_CODING	chr2	215674224	G	A	p.Pro24Ser	0.963636	575		4	p.P24S|p.P24S	chr2:215674224	ENST00000421162	COSM1482743,COSM442275
MSH2	rs2303424	MODERATE	NON_SYNONYMOUS_CODING	chr2	47739551	A	G	p.Gln915Arg	0.675676	260	2D	4	p.0?|p.0?|p.?|p.?	chr2:47739551	ENST00000406134	COSM43294,COSM43298,COSM43299,COSM43301
FRG1B		MODERATE	CODON_DELETION	chr20	29623248	AAAG	A	p.Lys21X	0.273256	2025		4	p.S25fs*1|p.S25fs*1	chr20:29623248	ENST00000358464	COSM1483524,COSM1483525
FRG1B	rs1803594	MODERATE	NON_SYNONYMOUS_CODING	chr20	29632662	G	C	p.Glu159Asp	0.498818	1037		4	p.E159D|p.E159D	chr20:29632662	ENST00000358464	COSM1483528,COSM1483529
PRAME	rs1129172	MODERATE	NON_SYNONYMOUS_CODING	chr22	22899234	A	G	p.Trp7Arg	0.645161	368		4	p.W7R	chr22:22899234	ENST00000543184	COSM85675
MAGEF1		MODERATE	CODON_CHANGE_PLUS_CODON_INSERTION	chr3	184429133	A	ATCC	p.Asp159X	0.354167	885		4	p.E158_D159insE	chr3:184429133	ENST00000317897	COSM1421400	MAGE
MUC4		MODERATE	CODON_CHANGE_PLUS_CODON_INSERTION	chr3	195512373	G	GGAT	p.Ser2026X	0.214286	2078		4	p.S2026_T2027insS|p.S2026_T2027insS	chr3:195512373	ENST00000475231	COSM297438,COSM297439
KCNN2		MODERATE	CODON_INSERTION	chr5	113698631	T	TGCC	p.X54Ala	0.71875	1353		4	p.A58_V59insA|p.A58_V59insA	chr5:113698631	ENST00000512097	COSM1486217,COSM1486218
PCDHA8	rs6580012	MODERATE	NON_SYNONYMOUS_CODING	chr5	140222641	A	G	p.Lys579Glu	1	836		4	p.K579E|p.K579E	chr5:140222641	ENST00000531613	COSM448785,COSM448786	Extracellular
MRPS30	rs3747479	MODERATE	NON_SYNONYMOUS_CODING	chr5	44809162	G	C	p.Cys33Ser	0.764706	148		4	p.C33S|p.C33S	chr5:44809162	ENST00000507110	COSM1486797,COSM449710
RREB1	rs2281833	MODERATE	NON_SYNONYMOUS_CODING	chr6	7246998	G	A	p.Gly1439Arg	0.833333	247		4	p.G1439R|p.G1384R	chr6:7246998	ENST00000379938	COSM1487903,COSM451756
MUC12		MODERATE	CODON_INSERTION	chr7	100612955	A	ACTG	p.Thr18X	0.2875	1154		4	p.T18_T19insA	chr7:100612955	ENST00000536621	COSM1083212
PILRB		MODERATE	CODON_DELETION	chr7	99957128	GCCT	G	p.X208Cys	0.326923	744		4	p.L212delL|p.L209R	chr7:99957128	ENST00000452089	COSM111714,COSM1453410
CSMD3	rs1592624	MODERATE	NON_SYNONYMOUS_CODING	chr8	113241088	T	G	p.Asn3621His	1	1909		4	p.N3621H|p.N3581H	chr8:113241088	ENST00000297405	COSM1166813,COSM1166814	Extracellular
ZNF705B	rs2740676	MODERATE	NON_SYNONYMOUS_CODING	chr8	7808219	A	T	p.Ile90Leu	0.540541	171		4	p.I90L|p.I90L	chr8:7808219	ENST00000443676	COSM1137907,COSM1137908
C8orf59		MODERATE	CODON_CHANGE_PLUS_CODON_INSERTION	chr8	86126827	C	CAACATT	p.Val88X	1	3070		4	p.V88_D89insNV	chr8:86126827	ENST00000524353	COSM1458434
SNAPC4		MODERATE	CODON_DELETION	chr9	139277994	CGCT	C	p.Ser542X	0.433333	553		4	p.S542delS	chr9:139277994	ENST00000298532	COSM247490
OR6N1	rs857826	MODERATE	NON_SYNONYMOUS_CODING	chr1	158735740	A	G	p.Phe245Leu	0.5	138		3	p.F245L	chr1:158735740	ENST00000335094	COSM1127314	Transmembrane_region
SCYL3	rs4656197	MODERATE	NON_SYNONYMOUS_CODING	chr1	169823718	T	C	p.Gln621Arg	0.487179	176		3	p.Q621R|p.Q567R	chr1:169823718	ENST00000367772	COSM1336135,COSM146679
AXDND1		MODERATE	CODON_DELETION	chr1	179504034	GAAGAAC	G	p.X990Glu	0.222222	255		3	p.Q992E|p.E991_Q992delEQ	chr1:179504034	ENST00000367618	COSM1336701,COSM146262
OBSCN	rs1188721	MODERATE	NON_SYNONYMOUS_CODING	chr1	228464248	T	G	p.Asp2481Glu	1	605		3	p.D2290E|p.D2106E|p.D2389E	chr1:228464248	ENST00000570156	COSM1339606,COSM1339607,COSM1339608
OBSCN	rs56021350	MODERATE	NON_SYNONYMOUS_CODING	chr1	228486404	C	T	p.Thr4399Met	0.371429	127		3	p.T4154M|p.T4024M|p.T4253M	chr1:228486404	ENST00000570156	COSM1473524,COSM425517,COSM425518
OBSCN	rs3795809	MODERATE	NON_SYNONYMOUS_CODING	chr1	228525008	G	A	p.Arg6532His	0.595506	400		3	p.R6287H|p.R6157H|p.R5575H	chr1:228525008	ENST00000570156	COSM1339807,COSM1339808,COSM1339809
OR2T35		HIGH	FRAME_SHIFT	chr1	248801944	TCAGCACG	T	c.608*>-CAGCACG	1	3070		3	p.C203fs*1	chr1:248801944	ENST00000317450	COSM1179048	Transmembrane_region
LDLRAP1	rs6687605	MODERATE	NON_SYNONYMOUS_CODING	chr1	25889632	T	C	p.Ser202Pro	0.69697	228		3	p.S202fs*2	chr1:25889632	ENST00000374338	COSM1341262
MYO3A	rs3758449	MODERATE	NON_SYNONYMOUS_CODING	chr10	26446312	G	A	p.Ser956Asn	0.347594	302		3	p.S956N	chr10:26446312	ENST00000265944	COSM146910
SVIL	rs199726033	MODERATE	NON_SYNONYMOUS_CODING	chr10	29779847	A	C	p.Leu948Arg	0.337349	142		3	p.L1374R	chr10:29779847	ENST00000375400	COSM146919
PTPN5	rs4757707	MODERATE	NON_SYNONYMOUS_CODING	chr11	18764026	G	C	p.Pro170Ala	1	292		3	p.P170A|p.P170A	chr11:18764026	ENST00000396171	COSM1353095,COSM143742
OR4C3		MODERATE	CODON_DELETION	chr11	48346660	TTTGCTGATC	T	p.X57X	0.35	288		3	p.L57_I59delLLI	chr11:48346660	ENST00000319856	COSM1163639
LRFN4	rs3741194	MODERATE	NON_SYNONYMOUS_CODING	chr11	66626234	T	C	p.Val340Ala	1	293		3	p.V340A	chr11:66626234	ENST00000525479	COSM429686
B3GNT6		HIGH	FRAME_SHIFT	chr11	76751541	CT	C	c.945*>-T	1	1244		3	p.L316P|p.G317fs*39	chr11:76751541	ENST00000354301	COSM1171842,COSM1561974
HCAR3	rs17884481	MODERATE	NON_SYNONYMOUS_CODING	chr12	123200693	A	G	p.Phe198Leu	0.963636	645		3	p.F198L|p.F198L|p.F198L	chr12:123200693	ENST00000528880	COSM1359643,COSM1359644,COSM1359645
DDN	rs10783299	MODERATE	NON_SYNONYMOUS_CODING	chr12	49390677	T	C	p.Glu661Gly	0.95	848		3	p.E607G|p.E661G	chr12:49390677	ENST00000421952	COSM147494,COSM1476598
AHNAK2	rs3742935	MODERATE	NON_SYNONYMOUS_CODING	chr14	105405599	G	C	p.Pro5397Ala	0.323529	122		3	p.P5397A|p.P367A	chr14:105405599	ENST00000333244	COSM1128317,COSM147857
RP11-124D2.6	rs10131813	MODERATE	NON_SYNONYMOUS_CODING	chr14	23745533	C	T	p.Ala304Thr	0.541667	146		3	p.A302T|p.A278T	chr14:23745533	ENST00000561013	COSM147743,COSM432886
GOLGA6L2	rs59122400	MODERATE	NON_SYNONYMOUS_CODING	chr15	23686673	G	A	p.Arg44Trp	1	375		3	p.R317W|p.R317W|p.R317W	chr15:23686673	ENST00000345070	COSM1477987,COSM1477988,COSM433634
HYDIN		HIGH	FRAME_SHIFT	chr16	70896015	GA	G	c.11711*>-A	0.456897	2077		3	p.Q3904fs*5|p.Q3856fs*5	chr16:70896015	ENST00000393567	COSM1317026,COSM146271
BCAR1	rs1035539	MODERATE	NON_SYNONYMOUS_CODING	chr16	75276775	G	A	p.Pro94Ser	0.52381	120		3	p.P122S|p.P76S|p.P76S	chr16:75276775	ENST00000420641	COSM1563497,COSM1563498,COSM1563499
KCNJ12	rs78117732	MODERATE	NON_SYNONYMOUS_CODING	chr17	21318782	G	A	p.Arg43His	0.429752	297		3	p.R43H	chr17:21318782	ENST00000583088	COSM1318527
CCT6B	rs9635769	MODERATE	NON_SYNONYMOUS_CODING	chr17	33288363	C	T	p.Arg17Gln	1	272		3	p.R17Q	chr17:33288363	ENST00000436961	COSM436375
NUMBL		MODERATE	CODON_CHANGE_PLUS_CODON_DELETION	chr19	41173892	CTGCTGT	C	p.X435Gln	1	1965		3	p.Q435Q|p.Q446delQ|p.Q445_Q446delQQ	chr19:41173892	ENST00000252891	COSM1393864,COSM439554,COSM996778
LENG9		MODERATE	CODON_CHANGE_PLUS_CODON_DELETION	chr19	54973988	GCCT	G	p.X262Ala	1	3070		3	p.E240delE	chr19:54973988	ENST00000333834	COSM1001159
ZFP28	rs7258088	MODERATE	NON_SYNONYMOUS_CODING	chr19	57050515	C	G	p.Ala43Gly	1	932		3	p.A43G	chr19:57050515	ENST00000591844	COSM440426
MUC16	rs17000816	MODERATE	NON_SYNONYMOUS_CODING	chr19	9072975	G	A	p.Thr4824Met	1	375		3	p.T4824M|p.T4824M|p.T457M	chr19:9072975	ENST00000397910	COSM1564907,COSM1564908,COSM1564909
ZNF177	rs2230752	MODERATE	NON_SYNONYMOUS_CODING	chr19	9492370	A	T	p.Ile455Phe	1	213		3	p.I455F|p.I295F	chr19:9492370	ENST00000589262	COSM1129633,COSM148502
GIGYF2		MODERATE	CODON_CHANGE_PLUS_CODON_DELETION	chr2	233712226	CACA	C	p.X1232Pro	0.763158	1491		3	p.Q1216delQ|p.Q1237delQ	chr2:233712226	ENST00000409480	COSM111734,COSM1134142
BIRC6	rs2366894	MODERATE	NON_SYNONYMOUS_CODING	chr2	32713706	A	T	p.Thr2674Ser	1	1040		3	p.T2674S|p.T2674S	chr2:32713706	ENST00000421745	COSM1483065,COSM148833
EPCAM	rs1126497	MODERATE	NON_SYNONYMOUS_CODING	chr2	47601106	T	C	p.Met143Thr	0.724638	468		3	p.0?|p.?|p.0?	chr2:47601106	ENST00000405271	COSM43294,COSM43297,COSM43298
PNO1	rs2044693	MODERATE	NON_SYNONYMOUS_CODING	chr2	68385097	A	G	p.Arg11Gly	0.304348	105		3	p.R11G	chr2:68385097	ENST00000263657	COSM443118
ANKRD36C	rs11695514	MODERATE	NON_SYNONYMOUS_CODING	chr2	96548068	C	T	p.Gly144Ser	0.733333	638		3	p.G368S|p.G368S|p.G538S	chr2:96548068	ENST00000419039	COSM1136750,COSM1136751,COSM1136752
PRNP	rs1799990	MODERATE	NON_SYNONYMOUS_CODING	chr20	4680251	A	G	p.Met129Val	0.978022	995		3	p.M129V	chr20:4680251	ENST00000457586	COSM42856
OGFR	rs6122315	MODERATE	NON_SYNONYMOUS_CODING	chr20	61444697	G	C	p.Ser577Thr	0.488889	139		3	p.S577T	chr20:61444697	ENST00000290291	COSM1412995
ZNF512B	rs817326	MODERATE	NON_SYNONYMOUS_CODING	chr20	62595990	T	C	p.Met372Val	0.62766	471		3	p.M372V	chr20:62595990	ENST00000450537	COSM329638
KRTAP19-6		HIGH	FRAME_SHIFT	chr21	31913981	AG	A	c.170*>-G	1	1338		3	p.Y58fs?	chr21:31913981	ENST00000334046	COSM1413647
RRP7A		HIGH	SPLICE_SITE_DONOR	chr22	42910685	T	TA		0.127273	234		3	p.?|p.?	chr22:42910685	ENST00000323013	COSM1167804,COSM217243
ARHGEF26	rs59508481	MODERATE	NON_SYNONYMOUS_CODING	chr3	153839959	C	T	p.Leu60Phe	0.977778	479		3	p.L60F|p.L60F|p.L60F	chr3:153839959	ENST00000465817	COSM445825,COSM445826,COSM445827
MUC4	rs75692609	MODERATE	NON_SYNONYMOUS_CODING	chr3	195511390	T	G	p.His2354Pro	0.375	251		3	p.H2354L|p.H2354P|p.H2354P	chr3:195511390	ENST00000475231	COSM1042899,COSM149595,COSM149596
ZNF717		MODERATE	CODON_DELETION	chr3	75786817	CACATTCATT	C	p.X650X	0.176829	1089		3	p.N650_C652delNEC|p.E651*	chr3:75786817	ENST00000422325	COSM111374,COSM1425328
ZNF717		HIGH	FRAME_SHIFT	chr3	75787098	CCT	C	c.1523*>-CT	0.512	3070		3	p.E560fs*4	chr3:75787098	ENST00000478296	COSM1192025
DKK2	rs17037102	MODERATE	NON_SYNONYMOUS_CODING	chr4	107845794	C	T	p.Arg46Gln	0.73913	341		3	p.R146Q	chr4:107845794	ENST00000513208	COSM149724
TMA16	rs2304802	MODERATE	NON_SYNONYMOUS_CODING	chr4	164435265	A	C	p.Gln65Pro	0.391304	153		3	p.R68fs*9|p.Q65P	chr4:164435265	ENST00000513272	COSM1428379,COSM149752
FRG1	rs73024915	MODERATE	NON_SYNONYMOUS_CODING	chr4	190864371	G	A	p.Ser26Asn	0.267606	90		3	p.S26N	chr4:190864371	ENST00000226798	COSM222975
FRAS1	rs12512164	MODERATE	NON_SYNONYMOUS_CODING	chr4	79300993	G	A	p.Glu1136Lys	0.731481	693		3	p.E1136K|p.E1136K|p.E1136K	chr4:79300993	ENST00000325942	COSM1131042,COSM1131043,COSM1131044
DSPP		MODERATE	CODON_DELETION	chr4	88537297	CAGCAGCGAT	C	p.X1162X	0.261538	636		3	p.D1164D|p.S1162_D1164delSSD	chr4:88537297	ENST00000399271	COSM1567215,COSM448312
SRA1		MODERATE	CODON_INSERTION	chr5	139931628	A	AGTC	p.X110Asp	0.178082	555		3	p.V110L|p.V110>GL|p.V110fs*2	chr5:139931628	ENST00000336283	COSM1166160,COSM1192026,COSM1486339
CYFIP2		HIGH	FRAME_SHIFT	chr5	156721863	T	TC	p.X94X	1	748		3	p.P94fs*16|p.P94fs*16|p.P94fs*16	chr5:156721863	ENST00000318218	COSM1169041,COSM1169042,COSM1169043
TENM2	rs201922736	MODERATE	NON_SYNONYMOUS_CODING	chr5	167674284	G	A	p.Val2114Ile	0.71875	248		3	p.V2114I|p.V1993I|p.V1947I	chr5:167674284	ENST00000518659	COSM1292078,COSM1292079,COSM1292080	Extracellular
AMACR	rs3195676	MODERATE	NON_SYNONYMOUS_CODING	chr5	34008100	C	T	p.Val9Met	0.442308	182		3	p.V9M	chr5:34008100	ENST00000502637	COSM449566
SYNE1	rs6911096	MODERATE	NON_SYNONYMOUS_CODING	chr6	152652034	A	T	p.Ser4596Thr	1	1260		3	p.S4525T|p.S4596T|p.S4596T	chr6:152652034	ENST00000367255	COSM1487365,COSM450728,COSM450729
TNXB	rs76250508	MODERATE	NON_SYNONYMOUS_CODING	chr6	32010272	T	A	p.Asn486Ile	0.655367	843		3	p.N486I|p.N4122I|p.N4057I	chr6:32010272	ENST00000451343	COSM1443459,COSM1443460,COSM1443461
ZAN	rs314299	MODERATE	NON_SYNONYMOUS_CODING	chr7	100371473	C	T	p.Arg433Cys	0.371429	115		3	p.R1922C|p.R1922C|p.R433C	chr7:100371473	ENST00000546213	COSM1446675,COSM1446676,COSM1446677
KIAA1549	rs2774962	MODERATE	NON_SYNONYMOUS_CODING	chr7	138602523	T	C	p.Arg617Gly	0.633803	400		3	p.R567G|p.R617G	chr7:138602523	ENST00000440172	COSM1448410,COSM150399
KIAA1549	rs59985563	MODERATE	NON_SYNONYMOUS_CODING	chr7	138603282	T	C	p.Thr364Ala	0.54	238		3	p.T314A|p.T364A	chr7:138603282	ENST00000440172	COSM1448417,COSM150400
FAM115C	rs144677924	MODERATE	NON_SYNONYMOUS_CODING	chr7	143417083	T	C	p.Cys311Arg	1	526		3	p.C311R	chr7:143417083	ENST00000444908	COSM1488317
ADAM22	rs111428945	MODERATE	NON_SYNONYMOUS_CODING	chr7	87704999	G	A	p.Glu128Lys	0.434783	232		3	p.E128K|p.E128K|p.E128K	chr7:87704999	ENST00000439864	COSM1195085,COSM1195086,COSM1195087
FZD1		MODERATE	CODON_INSERTION	chr7	90894459	A	ACCG	p.X89Pro	0.5	302		3	p.Q88_P89insA|p.Q88_P89insP	chr7:90894459	ENST00000287934	COSM328805,COSM453536
ADCK5	rs6599528	MODERATE	NON_SYNONYMOUS_CODING	chr8	145603114	A	C	p.Arg17Ser	1	275		3	p.R17S	chr8:145603114	ENST00000532190	COSM150567
SPATA31E1	rs11789780	MODERATE	NON_SYNONYMOUS_CODING	chr9	90503007	A	G	p.Asp1202Gly	0.310345	107		3	p.D1202G	chr9:90503007	ENST00000325643	COSM456205
FAM22F		MODERATE	CODON_DELETION	chr9	97080944	GAGA	G	p.Ser691X	1	3070		3	p.S691delS|p.S557delS	chr9:97080944	ENST00000253262	COSM1319563,COSM302182
GPR50		MODERATE	CODON_DELETION	chrX	150349557	CCACCACTGGCCA	C	p.X501Pro	0.481481	597		3	p.T502_H505delTTGH|p.T502_H505delTTGH	chrX:150349557	ENST00000218316	COSM111706,COSM1163654
AKNAD1	rs7522157	MODERATE	NON_SYNONYMOUS_CODING	chr1	109366286	C	T	p.Cys654Tyr	0.5	190		2	p.C654Y	chr1:109366286	ENST00000370001	COSM146570
IGSF3	rs75067537	MODERATE	NON_SYNONYMOUS_CODING	chr1	117142736	A	G	p.Ile639Thr	0.433333	98		2	p.I639T|p.I619T	chr1:117142736	ENST00000369483	COSM1491687,COSM1491688
PRDM2	rs2076324	MODERATE	NON_SYNONYMOUS_CODING	chr1	14105139	T	A	p.Asp82Glu	0.98	587		2	p.D283fs*2|p.D287delD	chr1:14105139	ENST00000413440	COSM1166773,COSM1333448
NBPF12	rs377655940	MODERATE	NON_SYNONYMOUS_CODING	chr1	146398399	G	A	p.Ala54Thr	0.352941	84		2	p.A129T|p.A129T	chr1:146398399	ENST00000309471	COSM1134688,COSM462863
NBPF14	rs147480284	MODERATE	NON_SYNONYMOUS_CODING	chr1	148004783	C	A	p.Ser844Ile	0.518519	251		2	p.S844I	chr1:148004783	ENST00000369219	COSM145667
ECM1	rs3737240	MODERATE	NON_SYNONYMOUS_CODING	chr1	150483355	C	T	p.Thr157Met	0.438202	282		2	p.T157M|p.T130M	chr1:150483355	ENST00000369049	COSM1472577,COSM423775
LCE3D	rs512208	MODERATE	NON_SYNONYMOUS_CODING	chr1	152552285	C	A	p.Gly43Val	0.326531	109		2	p.G43fs*12|p.G43V	chr1:152552285	ENST00000368787	COSM1334201,COSM146624
OR10J1	rs12048482	MODERATE	NON_SYNONYMOUS_CODING	chr1	159409857	A	G	p.Ile103Met	0.492754	271		2	p.I103M|p.I259M	chr1:159409857	ENST00000423932	COSM146659,COSM146660	Extracellular
ADAMTS4	rs4233367	MODERATE	NON_SYNONYMOUS_CODING	chr1	161163037	T	C	p.Gln626Arg	0.5	126		2	p.Q626R|p.Q626R	chr1:161163037	ENST00000367996	COSM1472886,COSM424371
NADK	rs4751	MODERATE	NON_SYNONYMOUS_CODING	chr1	1686040	G	T	p.Asn407Lys	0.615385	183		2	p.N230K|p.N262K	chr1:1686040	ENST00000378625	COSM1472949,COSM424509
PRRC2C	rs760644	MODERATE	NON_SYNONYMOUS_CODING	chr1	171509327	G	A	p.Ala908Thr	1	417		2	p.A908T|p.A908T	chr1:171509327	ENST00000392078	COSM1158680,COSM1158681
TMEM52	rs28640257	MODERATE	NON_SYNONYMOUS_CODING	chr1	1849529	A	G	p.Met141Thr	0.225	37		2	p.M141T	chr1:1849529	ENST00000310991	COSM146377
CAMK1G	rs11119314	MODERATE	NON_SYNONYMOUS_CODING	chr1	209782343	A	G	p.His193Arg	1	806		2	p.P218P	chr1:209782343	ENST00000423146	COSM146752
TRAF3IP3	rs669694	MODERATE	NON_SYNONYMOUS_CODING	chr1	209950760	C	G	p.Gln373Glu	0.447619	317		2	p.Q353E	chr1:209950760	ENST00000367025	COSM1127153
MIA3	rs2936052	MODERATE	NON_SYNONYMOUS_CODING	chr1	222802376	A	G	p.Lys605Arg	0.525	208		2	p.K605R	chr1:222802376	ENST00000344922	COSM146780	Extracellular
OBSCN	rs500049	MODERATE	NON_SYNONYMOUS_CODING	chr1	228559994	C	T	p.Ala8129Val	1	563		2	p.A7884V|p.A7754V	chr1:228559994	ENST00000570156	COSM1473567,COSM425535
TRIM58	rs3811444	MODERATE	NON_SYNONYMOUS_CODING	chr1	248039451	C	T	p.Thr374Met	0.565217	146		2	p.T374M	chr1:248039451	ENST00000366481	COSM146852
SYTL1	rs3813795	MODERATE	NON_SYNONYMOUS_CODING	chr1	27679797	A	G	p.Gln456Arg	0.674419	266		2	p.D454fs*>103|p.D442fs*>103	chr1:27679797	ENST00000543823	COSM1473827,COSM1473828
EPS15	rs41292521	MODERATE	NON_SYNONYMOUS_CODING	chr1	51873967	G	A	p.Ser438Leu	0.289474	81		2	p.0?|p.0?	chr1:51873967	ENST00000371733	COSM43313,COSM43322
NRD1		MODERATE	CODON_CHANGE_PLUS_CODON_DELETION	chr1	52306063	ATCT	A	p.X22Asp	1	3070		2	p.E154delE|p.E154D	chr1:52306063	ENST00000544028	COSM1237693,COSM249022
MROH7	rs11206407	MODERATE	NON_SYNONYMOUS_CODING	chr1	55119144	A	G	p.His182Arg	0.978723	564		2	p.H182R|p.H182R	chr1:55119144	ENST00000421030	COSM1343516,COSM1343517
WLS	rs983034	MODERATE	NON_SYNONYMOUS_CODING	chr1	68603586	C	T	p.Val465Ile	0.394737	136		2	p.V463I|p.V465I	chr1:68603586	ENST00000540432	COSM1344075,COSM1344076
NRAP	rs868738	MODERATE	NON_SYNONYMOUS_CODING	chr10	115381747	G	A	p.Arg892Cys	1	566		2	p.R884C	chr10:115381747	ENST00000369358	COSM147047
FAM22A	rs200168540	MODERATE	NON_SYNONYMOUS_CODING	chr10	88988115	G	A	p.Ala160Thr	0.5	127		2	p.A160T|p.A87T	chr10:88988115	ENST00000381707	COSM1317420,COSM1317421
MUC6	rs34844844	MODERATE	NON_SYNONYMOUS_CODING	chr11	1017183	G	T	p.Pro1873Gln	0.267241	85		2	p.P1873Q|p.P1873Q	chr11:1017183	ENST00000421673	COSM1350278,COSM1350279
MUC2		MODERATE	CODON_CHANGE_PLUS_CODON_DELETION	chr11	1092601	ACCACCACTCCCAGCCCTC	A	p.X1475Thr	0.354839	483		2	p.T1483_P1484insT|p.T1484_P1485insT	chr11:1092601	ENST00000359061	COSM1475009,COSM1475010
MUC2	rs77094665	MODERATE	NON_SYNONYMOUS_CODING	chr11	1092760	A	C	p.Thr1528Pro	0.551724	217		2	p.T1527P|p.T1528P	chr11:1092760	ENST00000359061	COSM1171746,COSM1171747
AMICA1	rs17121881	MODERATE	NON_SYNONYMOUS_CODING	chr11	118081345	A	T	p.Ile94Asn	1	602		2	p.I84N	chr11:118081345	ENST00000533261	COSM147332
MUC5B	rs2943512	MODERATE	NON_SYNONYMOUS_CODING	chr11	1272226	A	C	p.Thr4709Pro	0.976744	502		2	p.T4706fs*4|p.T4661fs*4	chr11:1272226	ENST00000447027	COSM1352160,COSM1352161
C11orf83	rs13941	MODERATE	NON_SYNONYMOUS_CODING	chr11	62439569	G	A	p.Gly89Ser	1	191		2	p.G89S	chr11:62439569	ENST00000531323	COSM429461
GDPD5	rs571353	MODERATE	NON_SYNONYMOUS_CODING	chr11	75152243	C	T	p.Ala480Thr	1	298		2	p.A480T	chr11:75152243	ENST00000529721	COSM330244
B3GNT6		HIGH	FRAME_SHIFT	chr11	76751584	CT	C	c.987*>-T	1	1227		2	p.G331fs*25	chr11:76751584	ENST00000354301	COSM1357066
ACACB	rs17848835	MODERATE	NON_SYNONYMOUS_CODING	chr12	109692053	C	T	p.Thr693Ile	0.981308	1238		2	p.T2027I|p.T693I	chr12:109692053	ENST00000543201	COSM1358599,COSM1358600
CHFR	rs2306536	MODERATE	NON_SYNONYMOUS_CODING	chr12	133423662	C	T	p.Val580Met	1	1026		2	p.V580M|p.V539M	chr12:133423662	ENST00000432561	COSM1360313,COSM1360314
ART4	rs11276	MODERATE	NON_SYNONYMOUS_CODING	chr12	14993439	C	T	p.Asp265Asn	1	356		2	p.D265N	chr12:14993439	ENST00000228936	COSM147449
DCP1B		MODERATE	CODON_CHANGE_PLUS_CODON_INSERTION	chr12	2062323	T	TTGC	p.Gln261X	0.875	1591		2	p.Q261_E262insQ	chr12:2062323	ENST00000280665	COSM249162
FOXM1	rs3742076	MODERATE	NON_SYNONYMOUS_CODING	chr12	2968169	A	G	p.Ser681Pro	0.722222	162		2	p.S681P	chr12:2968169	ENST00000342628	COSM430996
VWF	rs1800383	MODERATE	NON_SYNONYMOUS_CODING	chr12	6128170	C	G	p.Asp1472His	0.27907	74		2	p.D1472fs*53|p.D1472fs*40	chr12:6128170	ENST00000261405	COSM1363499,COSM1363500
GDF3	rs12819884	MODERATE	NON_SYNONYMOUS_CODING	chr12	7842932	C	T	p.Gly213Arg	0.935065	769		2	p.G213R	chr12:7842932	ENST00000329913	COSM147409
PZP	rs10842971	MODERATE	NON_SYNONYMOUS_CODING	chr12	9303296	A	T	p.Ile1443Asn	0.981481	666		2	p.I1443N|p.I1229N	chr12:9303296	ENST00000261336	COSM147423,COSM147424
PABPC3		HIGH	FRAME_SHIFT	chr13	25670801	T	TG	p.X156X	0.291667	328		2	p.M158fs*1|p.M158fs*17	chr13:25670801	ENST00000281589	COSM1366065,COSM1562334
MMP14	rs1042703	MODERATE	NON_SYNONYMOUS_CODING	chr14	23306048	C	T	p.Pro8Ser	1	341		2	p.P8S	chr14:23306048	ENST00000311852	COSM432856
ACIN1		MODERATE	CODON_CHANGE_PLUS_CODON_INSERTION	chr14	23548783	A	AGAACGT	p.Ser645X	1	855		2	p.S647_A648insRS	chr14:23548783	ENST00000555053	COSM1162679
RP11-124D2.6		MODERATE	CODON_CHANGE_PLUS_CODON_DELETION	chr14	23744826	TTCC	T	p.X538Glu	0.24	239		2	p.E537delE|p.E513delE	chr14:23744826	ENST00000561013	COSM954651,COSM954652
TBPL2	rs8019270	MODERATE	NON_SYNONYMOUS_CODING	chr14	55907172	C	G	p.Arg31Pro	1	340		2	p.R31P	chr14:55907172	ENST00000247219	COSM433153
PLEKHH1	rs3825725	MODERATE	NON_SYNONYMOUS_CODING	chr14	68035879	A	G	p.Thr430Ala	0.555556	200		2	p.T430A|p.T469A	chr14:68035879	ENST00000329153	COSM433269,COSM433270
ACOT4		HIGH	FRAME_SHIFT	chr14	74060513	GCTTA	G	c.565*>-CTTA	0.359223	1696		2	p.A189fs*32	chr14:74060513	ENST00000326303	COSM296207
SERPINA9	rs11628722	MODERATE	NON_SYNONYMOUS_CODING	chr14	94931105	A	G	p.Val348Ala	1	399		2	p.V348A|p.V348A	chr14:94931105	ENST00000337425	COSM1371809,COSM1371810
CYFIP1	rs7170637	MODERATE	NON_SYNONYMOUS_CODING	chr15	22969232	G	A	p.Gly820Ser	0.525424	261		2	p.G820S|p.G389S	chr15:22969232	ENST00000560848	COSM1372038,COSM1372039
ATP10A	rs116641809	MODERATE	NON_SYNONYMOUS_CODING	chr15	25925284	C	T	p.Ala1284Thr	0.428571	30		2	p.A1284T	chr15:25925284	ENST00000356865	COSM1183979	Transmembrane_region
FSIP1	rs10152640	MODERATE	NON_SYNONYMOUS_CODING	chr15	39910431	A	G	p.Cys402Arg	0.428571	129		2	p.C402R	chr15:39910431	ENST00000350221	COSM147877
CASC5	rs12911738	MODERATE	NON_SYNONYMOUS_CODING	chr15	40903684	A	G	p.Thr87Ala	0.416667	119		2	p.T113A|p.T113A	chr15:40903684	ENST00000399668	COSM433785,COSM433786
CCDC33		MODERATE	CODON_DELETION	chr15	74536400	TAAG	T	p.Lys33X	1	2394		2	p.K34delK|p.K237delK	chr15:74536400	ENST00000398814	COSM1374515,COSM1374516
CHD2	rs7179364	MODERATE	NON_SYNONYMOUS_CODING	chr15	93448222	G	A	p.Asp29Asn	1	858		2	p.?|p.?	chr15:93448222	ENST00000536619	COSM1235313,COSM1235314
DNAH3	rs12924551	MODERATE	NON_SYNONYMOUS_CODING	chr16	20966273	G	A	p.Arg3645Cys	0.731343	435		2	p.R3645S|p.R3645S	chr16:20966273	ENST00000261383	COSM122611,COSM122612
RBBP6		HIGH	SPLICE_SITE_DONOR	chr16	24564879	GTA	G		0.55	507		2	p.?	chr16:24564879	ENST00000319715	COSM132840
AQP8	rs117255669	MODERATE	NON_SYNONYMOUS_CODING	chr16	25238420	G	A	p.Ala212Thr	0.5	158		2	p.A212T|p.A212T	chr16:25238420	ENST00000219660	COSM1376952,COSM1376953
AQP8	rs2287798	MODERATE	NON_SYNONYMOUS_CODING	chr16	25239805	G	C	p.Ala260Pro	0.236842	49		2	p.A260P|p.A260P	chr16:25239805	ENST00000219660	COSM148054,COSM148055	Cytoplasmic
ZNF720		HIGH	FRAME_SHIFT	chr16	31770696	G	GA	p.X127X	1	2306		2	p.*127*	chr16:31770696	ENST00000316491	COSM1377678
MYLK3	rs28407821	MODERATE	NON_SYNONYMOUS_CODING	chr16	46773999	C	A	p.Val180Leu	0.576923	140		2	p.V231L|p.V180L	chr16:46773999	ENST00000394809	COSM148070,COSM148071
ANKS3	rs863980	MODERATE	NON_SYNONYMOUS_CODING	chr16	4751045	C	T	p.Ala404Thr	1	284		2	p.A404T	chr16:4751045	ENST00000304283	COSM148013
CDH3	rs1126933	MODERATE	NON_SYNONYMOUS_CODING	chr16	68721533	G	C	p.Gln563His	0.532847	533		2	p.?|p.?	chr16:68721533	ENST00000429102	COSM43333,COSM43334
HYDIN	rs6416709	MODERATE	NON_SYNONYMOUS_CODING	chr16	71054178	T	C	p.Ile1077Val	0.471154	354		2	p.I1029V|p.I1077V	chr16:71054178	ENST00000393567	COSM244980,COSM244981
CHST5	rs3826107	MODERATE	NON_SYNONYMOUS_CODING	chr16	75563330	G	A	p.Thr324Met	0.341463	108		2	p.T318M	chr16:75563330	ENST00000541075	COSM435778	Lumenal
PKD1L2	rs8060294	MODERATE	NON_SYNONYMOUS_CODING	chr16	81248745	A	G	p.Leu173Ser	1	364		2	p.L173S|p.L173S	chr16:81248745	ENST00000599697	COSM1563476,COSM1563477
CENPBD1	rs4785755	MODERATE	NON_SYNONYMOUS_CODING	chr16	90037828	G	A	p.Thr168Ile	0.363636	42		2	p.T168I|p.T168I	chr16:90037828	ENST00000314994	COSM1380600,COSM1380601
NCOR1	rs1926967	MODERATE	NON_SYNONYMOUS_CODING	chr17	16068463	C	T	p.Gly41Arg	0.25641	73		2	p.G150R	chr17:16068463	ENST00000395848	COSM249685
RAI1		MODERATE	CODON_DELETION	chr17	17697093	CCAG	C	p.Gln278X	1	739		2	p.Q291delQ|p.Q278_Q281delQQQQ	chr17:17697093	ENST00000353383	COSM1479304,COSM436135
MAP2K3	rs33911218	MODERATE	NON_SYNONYMOUS_CODING	chr17	21202191	C	A	p.Pro40Thr	0.673077	293		2	p.R46fs*24|p.R13fs*24	chr17:21202191	ENST00000342679	COSM1381512,COSM1381513
KCNJ12	rs1612176	MODERATE	NON_SYNONYMOUS_CODING	chr17	21319767	C	G	p.Ser371Arg	0.571429	151		2	p.S371S	chr17:21319767	ENST00000583088	COSM1285668
MED1	rs369612086	MODERATE	NON_SYNONYMOUS_CODING	chr17	37565611	C	T	p.Gly955Ser	0.372881	251		2	p.G955S	chr17:37565611	ENST00000300651	COSM71610
STARD3	rs1877031	MODERATE	NON_SYNONYMOUS_CODING	chr17	37814080	G	A	p.Arg91Gln	0.5	190		2	p.R117Q	chr17:37814080	ENST00000580611	COSM148258
BRCA1	rs16942	MODERATE	NON_SYNONYMOUS_CODING	chr17	41244000	T	C	p.Lys887Arg	0.477011	550	2B	2	p.K1183R|p.K1183fs*4	chr17:41244000	ENST00000309486	COSM148277,COSM23931
USP6	rs78465432	MODERATE	NON_SYNONYMOUS_CODING	chr17	5036274	C	A	p.His89Asn	0.272727	47		2	p.H89N|p.H89N	chr17:5036274	ENST00000574788	COSM132780,COSM132781
RNF43	rs2257205	MODERATE	NON_SYNONYMOUS_CODING	chr17	56448297	C	T	p.Arg117His	0.6	129		2	p.R117fs*41|p.R117fs*8	chr17:56448297	ENST00000584437	COSM1384760,COSM1384761
CSHL1	rs2727307	MODERATE	NON_SYNONYMOUS_CODING	chr17	61987570	G	T	p.Asp79Glu	0.563107	419		2	p.D141E|p.D58E	chr17:61987570	ENST00000259003	COSM1178445,COSM1178446
C17orf100		HIGH	FRAME_SHIFT	chr17	6555546	C	CG	p.X105X	1	845		2	p.P106fs*14	chr17:6555546	ENST00000391428	COSM1385595
KIF19	rs2271534	MODERATE	NON_SYNONYMOUS_CODING	chr17	72350402	G	A	p.Ala804Thr	0.419355	119		2	p.A804T	chr17:72350402	ENST00000389916	COSM437308
C17orf77	rs493430	MODERATE	NON_SYNONYMOUS_CODING	chr17	72588326	A	C	p.Arg47Ser	0.47561	284		2	p.R47S|p.S6A	chr17:72588326	ENST00000392620	COSM1130171,COSM1130172
CD300LF	rs2034310	MODERATE	NON_SYNONYMOUS_CODING	chr17	72691928	T	C	p.Gln233Arg	1	751		2	p.Q218R|p.Q218R	chr17:72691928	ENST00000583937	COSM1385796,COSM1385797
OTOP3	rs7210616	MODERATE	NON_SYNONYMOUS_CODING	chr17	72937605	G	A	p.Arg64Gln	0.333333	91		2	p.R64Q	chr17:72937605	ENST00000328801	COSM330355
CBX8	rs4889891	MODERATE	NON_SYNONYMOUS_CODING	chr17	77768654	C	A	p.Gly317Val	1	310		2	p.G317V	chr17:77768654	ENST00000269385	COSM437708
AATK	rs7503604	MODERATE	NON_SYNONYMOUS_CODING	chr17	79095629	C	A	p.Gly703Cys	0.411765	99		2	p.G703C|p.G703C	chr17:79095629	ENST00000326724	COSM1480153,COSM437761
CCDC57	rs11077969	MODERATE	NON_SYNONYMOUS_CODING	chr17	80085633	A	G	p.Met834Thr	1	804		2	p.M834T|p.M834T	chr17:80085633	ENST00000392347	COSM437821,COSM437822
ANKRD30B	rs9675365	MODERATE	NON_SYNONYMOUS_CODING	chr18	14779969	C	G	p.Phe477Leu	0.848485	307		2	p.F477L|p.F477L	chr18:14779969	ENST00000447268	COSM1130087,COSM1130088
CCDC102B	rs2187094	MODERATE	NON_SYNONYMOUS_CODING	chr18	66513615	A	G	p.Lys298Arg	1	221		2	p.K298R	chr18:66513615	ENST00000584156	COSM148442
CNDP1		MODERATE	CODON_INSERTION	chr18	72223591	G	GTGC	p.Val15X	0.727273	431		2	p.L20_E21insL	chr18:72223591	ENST00000358821	COSM307404
WDR87	rs7252765	MODERATE	NON_SYNONYMOUS_CODING	chr19	38377409	A	T	p.Val2301Glu	1	209		2	p.V2262_E2267delVREEEE	chr19:38377409	ENST00000447313	COSM439379
PSG2	rs149579909	MODERATE	NON_SYNONYMOUS_CODING	chr19	43585111	C	G	p.Gly118Arg	1	509		2	p.G118R|p.G118R	chr19:43585111	ENST00000406487	COSM328448,COSM328449
FGF21	rs739320	MODERATE	NON_SYNONYMOUS_CODING	chr19	49261368	T	C	p.Leu174Pro	1	318		2	p.L174P	chr19:49261368	ENST00000593756	COSM439925
DHDH		HIGH	FRAME_SHIFT	chr19	49442849	T	TG	p.X171X	1	1914		2	p.A173fs*33	chr19:49442849	ENST00000221403	COSM1395144
TTYH1	rs3745420	MODERATE	NON_SYNONYMOUS_CODING	chr19	54946784	A	G	p.Thr427Ala	1	660		2	p.L396L|p.L396L	chr19:54946784	ENST00000391739	COSM1481489,COSM440279
TMEM150B	rs7246479	MODERATE	NON_SYNONYMOUS_CODING	chr19	55824332	T	G	p.Leu199Phe	0.971014	791		2	p.L199F	chr19:55824332	ENST00000438693	COSM440356	Transmembrane_region
NLRP4	rs143589259	MODERATE	NON_SYNONYMOUS_CODING	chr19	56372807	G	A	p.Gly638Arg	1	512		2	p.G638R	chr19:56372807	ENST00000346986	COSM376346
ARHGEF18	rs9329368	MODERATE	NON_SYNONYMOUS_CODING	chr19	7533850	A	G	p.Asn861Ser	1	357		2	p.N1019S|p.N861S	chr19:7533850	ENST00000319670	COSM440621,COSM440622
RGPD3	rs5007560	MODERATE	NON_SYNONYMOUS_CODING	chr2	107040564	C	T	p.Glu1287Lys	0.865385	494		2	p.E1287K|p.E1287K	chr2:107040564	ENST00000409886	COSM1136308,COSM1136309
RGPD3	rs62152468	MODERATE	NON_SYNONYMOUS_CODING	chr2	107049714	C	G	p.Glu745Gln	0.471429	192		2	p.E745Q|p.E745Q	chr2:107049714	ENST00000409886	COSM1526982,COSM1526983
C2orf76	rs1132267	MODERATE	NON_SYNONYMOUS_CODING	chr2	120078778	T	C	p.Ile46Val	1	1002		2	p.I46V	chr2:120078778	ENST00000409877	COSM441051
GPD2	rs2116665	MODERATE	NON_SYNONYMOUS_CODING	chr2	157406249	G	A	p.Arg37His	0.973684	459		2	p.R264H	chr2:157406249	ENST00000409125	COSM148959
FSIP2	rs16827154	MODERATE	NON_SYNONYMOUS_CODING	chr2	186670780	T	A	p.Tyr5672Asn	1	530		2	p.Y281N|p.Y281N	chr2:186670780	ENST00000343098	COSM1403874,COSM1403875
MREG	rs1864253	MODERATE	NON_SYNONYMOUS_CODING	chr2	216878008	C	G	p.Gly15Arg	1	631		2	p.G15R	chr2:216878008	ENST00000263268	COSM442291
SPEG	rs10755037	MODERATE	NON_SYNONYMOUS_CODING	chr2	220348751	C	T	p.Pro2189Leu	1	627		2	p.P2189L	chr2:220348751	ENST00000312358	COSM442355
SPHKAP	rs3828161	MODERATE	NON_SYNONYMOUS_CODING	chr2	228882970	T	C	p.Gln867Arg	1	550		2	p.Q867L|p.Q867L	chr2:228882970	ENST00000392056	COSM1406017,COSM1406018
PASK	rs1470414	MODERATE	NON_SYNONYMOUS_CODING	chr2	242077496	C	T	p.Val64Ile	0.66129	385		2	p.V250I|p.V250I	chr2:242077496	ENST00000544142	COSM149119,COSM149120
OTOF	rs4665855	MODERATE	NON_SYNONYMOUS_CODING	chr2	26700700	G	A	p.Pro21Leu	0.68	165		2	p.P21L	chr2:26700700	ENST00000402415	COSM442715
KHK	rs2304681	MODERATE	NON_SYNONYMOUS_CODING	chr2	27315252	G	A	p.Val49Ile	0.644737	415		2	p.V49I|p.V49I	chr2:27315252	ENST00000429697	COSM1407364,COSM1407365
TRAPPC12	rs11686212	MODERATE	NON_SYNONYMOUS_CODING	chr2	3392295	A	G	p.Ser301Gly	0.630435	261		2	p.S301G	chr2:3392295	ENST00000382110	COSM442851
MSH6	rs1042821	MODERATE	NON_SYNONYMOUS_CODING	chr2	48010488	G	A	p.Gly39Glu	0.228571	42	2D	2	p.0?|p.0?	chr2:48010488	ENST00000540021	COSM43294,COSM43298
STON1	rs3792234	MODERATE	NON_SYNONYMOUS_CODING	chr2	48809593	G	T	p.Gln607His	0.44	172		2	p.Q607H|p.Q607H	chr2:48809593	ENST00000406226	COSM1130770,COSM1130771
MRPL35	rs10901	MODERATE	NON_SYNONYMOUS_CODING	chr2	86433240	C	T	p.Pro19Ser	0.96	303		2	p.P19S	chr2:86433240	ENST00000409180	COSM148890
ANKRD36	rs10194525	MODERATE	NON_SYNONYMOUS_CODING	chr2	97877478	G	A	p.Val1157Met	0.352941	162		2	p.V1157M|p.V987M	chr2:97877478	ENST00000461153	COSM1024078,COSM1024079
SIRPA	rs72620874	MODERATE	NON_SYNONYMOUS_CODING	chr20	1895889	G	C	p.Gly75Ala	0.566038	255		2	p.G75A	chr20:1895889	ENST00000400068	COSM248832
RIN2	rs3803981	MODERATE	NON_SYNONYMOUS_CODING	chr20	19951534	T	A	p.Ser246Thr	0.3	114		2	p.S246A|p.S197A	chr20:19951534	ENST00000255006	COSM1483470,COSM443515
TGM3	rs214803	MODERATE	NON_SYNONYMOUS_CODING	chr20	2290333	C	A	p.Thr13Lys	1	548		2	p.T13K|p.T13M	chr20:2290333	ENST00000381458	COSM1533216,COSM50488
FRG1B	rs79198850	MODERATE	NON_SYNONYMOUS_CODING	chr20	29624070	G	A	p.Ala37Thr	0.247423	62		2	p.A32T|p.A32T	chr20:29624070	ENST00000439954	COSM477955,COSM477956
RBM12		MODERATE	CODON_CHANGE_PLUS_CODON_INSERTION	chr20	34240740	A	AGGGCCG	p.Pro835X	0.5	316		2	p.P837_I838insGP	chr20:34240740	ENST00000374114	COSM1483579
FAM83D	rs3752290	MODERATE	NON_SYNONYMOUS_CODING	chr20	37555116	G	C	p.Val41Leu	0.548387	168		2	p.V41L	chr20:37555116	ENST00000217429	COSM443806
PI3	rs17333103	MODERATE	NON_SYNONYMOUS_CODING	chr20	43803613	C	T	p.Thr17Met	0.5	245		2	p.T17M	chr20:43803613	ENST00000243924	COSM1178471
TP53TG5		MODERATE	CODON_DELETION	chr20	44004155	CATT	C	p.Asn97X	0.340426	703		2	p.N97delN|p.N97D	chr20:44004155	ENST00000372726	COSM1412056,COSM1565764
PREX1	rs41283558	MODERATE	NON_SYNONYMOUS_CODING	chr20	47269233	C	G	p.Gln786His	0.631579	231		2	p.Q786H|p.Q786H	chr20:47269233	ENST00000396220	COSM1412286,COSM1412287
PREX1	rs55904123	MODERATE	NON_SYNONYMOUS_CODING	chr20	47273726	C	T	p.Val659Met	0.275862	75		2	p.V659M|p.V659M	chr20:47273726	ENST00000396220	COSM1178473,COSM1178474
CHGB	rs6085324	MODERATE	NON_SYNONYMOUS_CODING	chr20	5903067	T	A	p.Ser93Thr	0.6	168		2	p.S93T	chr20:5903067	ENST00000378961	COSM149134
OGFR	rs35813009	MODERATE	NON_SYNONYMOUS_CODING	chr20	61444693	G	A	p.Glu576Lys	0.444444	122		2	p.E576K	chr20:61444693	ENST00000290291	COSM1412994
ZGPAT	rs1291212	MODERATE	NON_SYNONYMOUS_CODING	chr20	62340115	C	G	p.Ser61Arg	1	448		2	p.S61R	chr20:62340115	ENST00000448100	COSM444235
TPTE	rs150482	MODERATE	NON_SYNONYMOUS_CODING	chr21	10910347	A	G	p.Leu470Pro	1	1281		2	p.L470P|p.L452P	chr21:10910347	ENST00000361285	COSM1180664,COSM1180665
HPS4	rs5752330	MODERATE	NON_SYNONYMOUS_CODING	chr22	26859942	C	T	p.Val565Met	1	507		2	p.V552M|p.V565M	chr22:26859942	ENST00000398141	COSM444809,COSM444810
PRR14L	rs112531886	MODERATE	NON_SYNONYMOUS_CODING	chr22	32113269	C	A	p.Val186Leu	0.333333	32		2	p.V186L|p.V186L	chr22:32113269	ENST00000434485	COSM1327265,COSM1327266
MYH9	rs116972183	MODERATE	NON_SYNONYMOUS_CODING	chr22	36688175	G	A	p.His1401Tyr	0.688525	368		2	p.H1401_E1402>E|p.H1401del	chr22:36688175	ENST00000216181	COSM26967,COSM32605
SYNGR1		MODERATE	CODON_INSERTION	chr22	39777822	C	CCAA	p.Pro202X	0.297297	537		2	p.P202_T203insN	chr22:39777822	ENST00000328933	COSM1484245
TNRC6B		MODERATE	CODON_DELETION	chr22	40697176	TGCA	T	p.X516Leu	0.607143	809		2	p.Q524delQ|p.Q1342delQ	chr22:40697176	ENST00000402203	COSM1034396,COSM1034397
POLDIP3	rs28627172	MODERATE	NON_SYNONYMOUS_CODING	chr22	43010817	G	A	p.Ala16Val	0.658537	217		2	p.A16V|p.A16V	chr22:43010817	ENST00000348657	COSM445075,COSM445076
TTLL8		MODERATE	NON_SYNONYMOUS_CODING	chr22	50468907	C	G,T	p.Gly719Arg	1	148		2	p.G735R|p.G719R	chr22:50468907	ENST00000266182	COSM1484324,COSM445151
SCO2	rs140523	MODERATE	NON_SYNONYMOUS_CODING	chr22	50962782	C	G	p.Arg20Pro	0.328571	128		2	p.R20P|p.R20P	chr22:50962782	ENST00000543927	COSM1484348,COSM445183
KBTBD12	rs4141499	MODERATE	NON_SYNONYMOUS_CODING	chr3	127641968	C	A	p.Gln22Lys	0.584615	347		2	p.Q22K|p.Q22K	chr3:127641968	ENST00000405256	COSM1418734,COSM1418735
GATA2	rs2335052	MODERATE	NON_SYNONYMOUS_CODING	chr3	128204951	C	T	p.Ala164Thr	0.438596	194		2	p.A164T	chr3:128204951	ENST00000487848	COSM445531
CAND2	rs3732675	MODERATE	NON_SYNONYMOUS_CODING	chr3	12858028	T	C	p.Ser533Pro	1	305		2	p.S533P|p.S440P	chr3:12858028	ENST00000456430	COSM1484577,COSM445535
KNG1	rs1656922	MODERATE	NON_SYNONYMOUS_CODING	chr3	186443018	T	C	p.Met178Thr	0.64	792		2	p.M178T|p.M178T	chr3:186443018	ENST00000447445	COSM149539,COSM149540
ATP13A5	rs12637558	MODERATE	NON_SYNONYMOUS_CODING	chr3	193081122	G	T	p.Ser96Tyr	1	575		2	p.S96F|p.S96Y	chr3:193081122	ENST00000342358	COSM226094,COSM77312
MUC4		MODERATE	NON_SYNONYMOUS_CODING	chr3	195505762	A	G	p.Leu4230Pro	0.1875	30		2	p.L4230P	chr3:195505762	ENST00000475231	COSM1286367
MUC4	rs199822551	MODERATE	NON_SYNONYMOUS_CODING	chr3	195507062	C	T	p.Asp3797Asn	0.306931	102		2	p.A3782_D3797del16|p.D3797N	chr3:195507062	ENST00000475231	COSM1421891,COSM446231
MUC4	rs142559357	MODERATE	NON_SYNONYMOUS_CODING	chr3	195510707	T	G	p.Thr2582Pro	0.389831	179		2	p.T2582P|p.T2582P	chr3:195510707	ENST00000475231	COSM149587,COSM149588
MUC4	rs3103959	MODERATE	NON_SYNONYMOUS_CODING	chr3	195513779	C	T	p.Ala1558Thr	0.386792	174		2	p.A1545_S1560del16	chr3:195513779	ENST00000475231	COSM1421925
MUC4	rs1106502	MODERATE	NON_SYNONYMOUS_CODING	chr3	195517258	G	A	p.Thr398Ile	1	534		2	p.T398I|p.T398I	chr3:195517258	ENST00000475231	COSM149619,COSM149620
EFHB	rs76305623	MODERATE	NON_SYNONYMOUS_CODING	chr3	19930130	A	T	p.Met580Lys	1	598		2	p.M580K|p.M580K	chr3:19930130	ENST00000295824	COSM1318688,COSM1318689
DLEC1	rs7625806	MODERATE	NON_SYNONYMOUS_CODING	chr3	38080952	T	G	p.Leu79Arg	1	188		2	p.L79R|p.L79R	chr3:38080952	ENST00000452631	COSM446431,COSM446432
RPL14		MODERATE	CODON_INSERTION	chr3	40503520	A	ACTGCTG	p.Thr149*	0.9	490		2	p.A159_K160insAA	chr3:40503520	ENST00000396203	COSM1044560
ULK4	rs2272007	MODERATE	NON_SYNONYMOUS_CODING	chr3	41996136	T	C	p.Lys39Arg	1	426		2	p.K39R|p.K39R	chr3:41996136	ENST00000420927	COSM1131440,COSM1131441
KLHL40	rs6805421	MODERATE	NON_SYNONYMOUS_CODING	chr3	42728144	A	G	p.Asn345Ser	1	591		2	p.N345S	chr3:42728144	ENST00000287777	COSM149365
SETD2	rs4082155	MODERATE	NON_SYNONYMOUS_CODING	chr3	47125385	G	A	p.Pro1962Leu	1	1112		2	p.P1962L|p.P1459L	chr3:47125385	ENST00000409792	COSM149375,COSM149376
ATXN7	rs3774729	MODERATE	NON_SYNONYMOUS_CODING	chr3	63982082	G	A	p.Val862Met	0.977273	552		2	p.V862M|p.V862M	chr3:63982082	ENST00000538065	COSM1567155,COSM1567156
OR5H6	rs9871143	MODERATE	NON_SYNONYMOUS_CODING	chr3	97983981	G	A	p.Asp285Asn	1	427		2	p.D285N	chr3:97983981	ENST00000383696	COSM149433	Extracellular
LRIT3	rs764205	MODERATE	NON_SYNONYMOUS_CODING	chr4	110790911	A	T	p.Met336Leu	0.346154	88		2	p.M291L|p.M153L	chr4:110790911	ENST00000594814	COSM1131303,COSM1131304
LRIT3	rs2347131	MODERATE	NON_SYNONYMOUS_CODING	chr4	110791361	G	A	p.Ala486Thr	0.62963	315		2	p.A441T|p.A303T	chr4:110791361	ENST00000594814	COSM1426365,COSM1426366
PRSS48	rs36097019	MODERATE	NON_SYNONYMOUS_CODING	chr4	152201053	G	A	p.Cys53Tyr	0.803922	416		2	p.C53Y|p.C65Y	chr4:152201053	ENST00000455694	COSM1427536,COSM1427537
DCHS2	rs11935573	MODERATE	NON_SYNONYMOUS_CODING	chr4	155241572	G	A	p.Ser1205Leu	1	348		2	p.S1205L	chr4:155241572	ENST00000357232	COSM149748
DCHS2	rs17373860	MODERATE	NON_SYNONYMOUS_CODING	chr4	155411883	G	A	p.Pro209Ser	0.676471	249		2	p.P209S|p.P209S	chr4:155411883	ENST00000443500	COSM1485783,COSM447530
NEIL3	rs13112390	MODERATE	NON_SYNONYMOUS_CODING	chr4	178274835	A	C	p.Gln471His	0.556338	581		2	p.Q471H|p.Q471H	chr4:178274835	ENST00000264596	COSM1131168,COSM1428751
FAT1	rs28647489	MODERATE	NON_SYNONYMOUS_CODING	chr4	187531022	A	G	p.Val3334Ala	0.987179	958		2	p.V3334A|p.V3334A	chr4:187531022	ENST00000441802	COSM1131159,COSM1131161
FAT1	rs1280098	MODERATE	NON_SYNONYMOUS_CODING	chr4	187538942	T	G	p.Gln2933Pro	1	296		2	p.Q2933fs*14|p.Q2933fs*14	chr4:187538942	ENST00000441802	COSM1429012,COSM1429013
FAT1	rs28489116	MODERATE	NON_SYNONYMOUS_CODING	chr4	187542755	T	C	p.Asn1662Ser	1	494		2	p.N1662S|p.N1662S	chr4:187542755	ENST00000441802	COSM1131153,COSM1131155
FRG1	rs1138717	MODERATE	NON_SYNONYMOUS_CODING	chr4	190874255	A	T	p.Thr98Ser	0.239726	60		2	p.T98S	chr4:190874255	ENST00000226798	COSM225554
APC	rs459552	MODERATE	NON_SYNONYMOUS_CODING	chr5	112176756	T	A	p.Val1822Asp	1	1515	2C	2	p.K1192fs*3|p.?	chr5:112176756	ENST00000508376	COSM27546,COSM33672
PCDHA1	rs2240696	MODERATE	NON_SYNONYMOUS_CODING	chr5	140168070	A	G	p.Tyr732Cys	1	368		2	p.Y732C|p.Y732C	chr5:140168070	ENST00000504120	COSM1433690,COSM1433691	Cytoplasmic
PCDHA3	rs7701755	MODERATE	NON_SYNONYMOUS_CODING	chr5	140182101	G	T	p.Ser440Ile	0.983333	705		2	p.S440I|p.S440I	chr5:140182101	ENST00000532566	COSM1130915,COSM1130916
PCDHA8	rs3756331	MODERATE	NON_SYNONYMOUS_CODING	chr5	140221139	G	A	p.Ser78Asn	1	958		2	p.S78N|p.S78N	chr5:140221139	ENST00000531613	COSM149927,COSM149928
DIAPH1		MODERATE	CODON_DELETION	chr5	140953563	TGGAGGA	TGGA,T	p.X616Pro	1	163		2	p.P620delP	chr5:140953563	ENST00000398557	COSM1486442
FLT4	rs448012	MODERATE	NON_SYNONYMOUS_CODING	chr5	180046344	G	C	p.His890Gln	1	460		2	p.H890Q|p.H890Q	chr5:180046344	ENST00000502649	COSM1486680,COSM449470
TRIM52		MODERATE	CODON_CHANGE_PLUS_CODON_DELETION	chr5	180687428	CTCT	C	p.X128Glu	0.613636	1318		2	p.E128E	chr5:180687428	ENST00000327767	COSM1436780
C5orf42	rs10076911	MODERATE	NON_SYNONYMOUS_CODING	chr5	37173930	A	C	p.Phe913Cys	0.573529	318		2	p.F2033C|p.F913C	chr5:37173930	ENST00000274258	COSM1437344,COSM1437345
ZNF311	rs6456880	MODERATE	NON_SYNONYMOUS_CODING	chr6	28963248	T	G	p.Lys511Gln	1	657		2	p.K511Q	chr6:28963248	ENST00000377179	COSM451117
DPCR1	rs3095149	MODERATE	NON_SYNONYMOUS_CODING	chr6	30917212	T	C	p.Ile324Thr	1	948		2	p.T317_T335del19|p.?	chr6:30917212	ENST00000462446	COSM1443197,COSM1443198
CCHCR1	rs130066	MODERATE	NON_SYNONYMOUS_CODING	chr6	31122315	G	C	p.Ser253Arg	0.551724	171		2	p.S253R|p.S164R	chr6:31122315	ENST00000396268	COSM1443230,COSM1443231
HLA-C	rs41543814	MODERATE	NON_SYNONYMOUS_CODING	chr6	31239430	C	T	p.Ala97Thr	1	557		2	p.A97T|p.A97T	chr6:31239430	ENST00000383329	COSM329393,COSM329394
CLIC1		MODERATE	CODON_DELETION	chr6	31704065	GTTC	G	p.Glu4X	0.481481	597		2	p.E4Q|p.E4E	chr6:31704065	ENST00000395892	COSM1443338,COSM79654
CYP21A2	rs6474	HIGH	SPLICE_SITE_ACCEPTOR	chr6	32006886	G	A		0.505495	355		2	p.R103K	chr6:32006886	ENST00000464325	COSM1319109
CCND3	rs1051130	MODERATE	NON_SYNONYMOUS_CODING	chr6	41903782	A	C	p.Leu132Arg	0.5	42		2	p.S259A	chr6:41903782	ENST00000510503	COSM451455
PKHD1	rs9381994	MODERATE	NON_SYNONYMOUS_CODING	chr6	51483961	T	C	p.Gln4048Arg	0.571429	491		2	p.Q4048R|p.Q4048P	chr6:51483961	ENST00000371117	COSM1445058,COSM451619	Cytoplasmic
DST	rs4715631	MODERATE	NON_SYNONYMOUS_CODING	chr6	56417545	T	C	p.Thr5318Ala	0.529032	592		2	p.T2726A|p.T5140A	chr6:56417545	ENST00000370754	COSM1445314,COSM1445315
ZAN	rs2734880	MODERATE	NON_SYNONYMOUS_CODING	chr7	100371100	C	A	p.Ala1873Glu	0.5	101		2	p.A1873E|p.A1873E	chr7:100371100	ENST00000546292	COSM1446671,COSM1446672
ZAN	rs314298	MODERATE	NON_SYNONYMOUS_CODING	chr7	100371114	C	T	p.Pro1878Ser	0.588235	105		2	p.P1878S|p.P1878S	chr7:100371114	ENST00000546292	COSM1446673,COSM1446674
VWDE	rs6460939	MODERATE	NON_SYNONYMOUS_CODING	chr7	12406989	C	G	p.Lys964Asn	0.509434	251		2	p.K964N|p.K223N	chr7:12406989	ENST00000275358	COSM1137630,COSM484743
PODXL		MODERATE	CODON_CHANGE_PLUS_CODON_INSERTION	chr7	131241029	G	GGGCGAC	p.Pro30X	0.571429	191		2	p.P30_S31delPS	chr7:131241029	ENST00000541194	COSM246696
TMEM176B	rs3173833	MODERATE	NON_SYNONYMOUS_CODING	chr7	150491084	T	G	p.Ser94Arg	1	290		2	p.S94R	chr7:150491084	ENST00000492607	COSM323877
MLL3	rs28522267	MODERATE	NON_SYNONYMOUS_CODING	chr7	151927021	C	A	p.Cys988Phe	0.30303	45	2D	2	p.C988F|p.C988F	chr7:151927021	ENST00000355193	COSM150426,COSM150427
MLL3		HIGH	FRAME_SHIFT	chr7	151945071	G	GT	p.X816X	0.189189	947	2D	2	p.Y816fs*1|p.Y816fs*1	chr7:151945071	ENST00000262189	COSM289942,COSM289943
WDR60		MODERATE	CODON_DELETION	chr7	158664074	TGAA	T	p.X104Leu	0.524272	2652		2	p.K105E|p.K105delK	chr7:158664074	ENST00000407559	COSM1449717,COSM87901
C7orf31	rs12535348	MODERATE	NON_SYNONYMOUS_CODING	chr7	25194753	C	T	p.Ala158Thr	0.666667	177		2	p.A158T	chr7:25194753	ENST00000409280	COSM150253
TNRC18	rs35508364	MODERATE	NON_SYNONYMOUS_CODING	chr7	5396715	T	C	p.Asn1676Asp	0.512821	183		2	p.N731D|p.N1676D	chr7:5396715	ENST00000430969	COSM150229,COSM150230
USP42	rs201342208	MODERATE	NON_SYNONYMOUS_CODING	chr7	6189919	G	A	p.Gly698Ser	0.5	147		2	p.G698S|p.G826S	chr7:6189919	ENST00000306177	COSM1451730,COSM1451731
ZNF853	rs2243563	MODERATE	NON_SYNONYMOUS_CODING	chr7	6656830	G	A	p.Gly8Arg	0.481481	146		2	p.G8R|p.G8R	chr7:6656830	ENST00000457543	COSM1568896,COSM1568897
WBSCR27	rs13241921	MODERATE	NON_SYNONYMOUS_CODING	chr7	73254812	T	C	p.Gln107Arg	0.411765	87		2	p.Q107R	chr7:73254812	ENST00000297873	COSM453359
CALCR	rs1801197	MODERATE	NON_SYNONYMOUS_CODING	chr7	93055753	A	G	p.Leu481Pro	0.518072	336		2	p.L481P|p.L447P	chr7:93055753	ENST00000359558	COSM1178513,COSM1178514
SLC39A4	rs17855765	MODERATE	NON_SYNONYMOUS_CODING	chr8	145641328	C	T	p.Ala89Thr	1	242		2	p.A89T|p.A114T	chr8:145641328	ENST00000276833	COSM1489129,COSM454232
ARHGEF10	rs9657362	MODERATE	NON_SYNONYMOUS_CODING	chr8	1833801	G	C	p.Leu395Phe	0.458824	268		2	p.L147F|p.L370F	chr8:1833801	ENST00000518288	COSM150437,COSM150438
SNAPC4	rs3812571	MODERATE	NON_SYNONYMOUS_CODING	chr9	139275294	G	C	p.His799Gln	1	335		2	p.H799Q	chr9:139275294	ENST00000298532	COSM455595
SLC34A3	rs28542318	MODERATE	NON_SYNONYMOUS_CODING	chr9	140130606	A	T	p.Glu513Val	1	323		2	p.E513V	chr9:140130606	ENST00000538474	COSM455647
EXD3	rs7020732	MODERATE	NON_SYNONYMOUS_CODING	chr9	140247143	T	G	p.Glu322Asp	1	507		2	p.E322D|p.E322D	chr9:140247143	ENST00000340951	COSM1489843,COSM455658
EXD3	rs11533158	MODERATE	NON_SYNONYMOUS_CODING	chr9	140262426	C	T	p.Ala160Thr	1	620		2	p.A160T|p.A160T	chr9:140262426	ENST00000479452	COSM1461395,COSM1461396
SMARCA2		MODERATE	CODON_DELETION	chr9	2039776	ACAG	A	p.Gln223X	0.35	660		2	p.Q223Q|p.Q223Q	chr9:2039776	ENST00000450198	COSM1266217,COSM1266218
KANK1	rs4465020	MODERATE	NON_SYNONYMOUS_CODING	chr9	712060	G	C	p.Glu432Gln	1	474		2	p.E432Q|p.E274Q	chr9:712060	ENST00000382303	COSM1132465,COSM1132467
ASPN		MODERATE	CODON_CHANGE_PLUS_CODON_INSERTION	chr9	95237024	CTCA	CTCATCA,C	p.Asp51X	0.941176	651		2	p.D51_E52insD|p.D51E	chr9:95237024	ENST00000395538	COSM1111125,COSM1463592
ERCC6L2	rs690528	HIGH	START_LOST	chr9	98638288	A	G	p.Met1Val	0.315789	50		2	p.M1V	chr9:98638288	ENST00000288985	COSM456305
ERCC6L2	rs56108623	MODERATE	NON_SYNONYMOUS_CODING	chr9	98638306	C	T	p.Pro7Ser	0.761905	184		2	p.P7S	chr9:98638306	ENST00000288985	COSM456306
FAM127B	rs2498776	MODERATE	NON_SYNONYMOUS_CODING	chrX	134185997	T	A	p.Ser48Cys	1	214		2	p.S48C	chrX:134185997	ENST00000370775	COSM150824
GPR50	rs561077	MODERATE	NON_SYNONYMOUS_CODING	chrX	150349649	A	G	p.Thr532Ala	0.625	172		2	p.N532D|p.T532A	chrX:150349649	ENST00000218316	COSM150834,COSM150835
MXRA5	rs5983119	MODERATE	NON_SYNONYMOUS_CODING	chrX	3241256	T	C	p.Ile824Val	1	321		2	p.I824V|p.I824V	chrX:3241256	ENST00000217939	COSM1467656,COSM1467657
SLC16A2	rs6647476	MODERATE	NON_SYNONYMOUS_CODING	chrX	73641569	T	C	p.Ser33Pro	0.612903	203		2	p.S107P	chrX:73641569	ENST00000587091	COSM458039	Cytoplasmic
FNDC7	rs11582005	MODERATE	NON_SYNONYMOUS_CODING	chr1	109268441	G	A	p.Ser310Asn	0.633333	215		1	p.S76N	chr1:109268441	ENST00000271311	COSM146569
AKNAD1	rs11580913	MODERATE	NON_SYNONYMOUS_CODING	chr1	109391662	G	C	p.Leu59Val	0.5	88		1	p.L352F	chr1:109391662	ENST00000357393	COSM1332346
LAMTOR5	rs6674775	MODERATE	NON_SYNONYMOUS_CODING	chr1	110950439	C	T	p.Ser17Asn	0.592593	153		1	p.S17N	chr1:110950439	ENST00000256644	COSM1332599
PROK1	rs7514102	MODERATE	NON_SYNONYMOUS_CODING	chr1	110998854	G	A	p.Val67Ile	0.968254	732		1	p.V67I	chr1:110998854	ENST00000271331	COSM146578
ST7L	rs6658555	MODERATE	NON_SYNONYMOUS_CODING	chr1	113098534	C	T	p.Arg451Gln	0.576923	180		1	p.R451Q	chr1:113098534	ENST00000369668	COSM146584
CASQ2	rs4074536	MODERATE	NON_SYNONYMOUS_CODING	chr1	116310967	T	C	p.Thr66Ala	0.979592	581		1	p.T66A	chr1:116310967	ENST00000456138	COSM1332993
CD101	rs3754112	MODERATE	NON_SYNONYMOUS_CODING	chr1	117554421	A	G	p.Asn225Ser	0.538462	115		1	p.N225S	chr1:117554421	ENST00000369470	COSM1178399
C1orf167	rs4846044	MODERATE	NON_SYNONYMOUS_CODING	chr1	11839998	T	C	p.Trp955Arg	1	228		1	p.E141fs*22	chr1:11839998	ENST00000433342	COSM87891
MTHFR	rs1801133	MODERATE	NON_SYNONYMOUS_CODING	chr1	11856378	G	A	p.Ala263Val	0.990385	1213		1	p.A222V	chr1:11856378	ENST00000376585	COSM146404
SPAG17	rs17185492	MODERATE	NON_SYNONYMOUS_CODING	chr1	118644524	T	A	p.Glu158Val	0.733333	135		1	p.E158V	chr1:118644524	ENST00000336338	COSM1178400
NOTCH2	rs2124109	MODERATE	NON_SYNONYMOUS_CODING	chr1	120539331	C	T	p.Gly225Arg	0.569231	564	2B	1	p.R223R	chr1:120539331	ENST00000602566	COSM248829
NOTCH2	rs11810554	MODERATE	NON_SYNONYMOUS_CODING	chr1	120611964	G	C	p.Cys19Trp	0.333333	118	2B	1	p.C19W	chr1:120611964	ENST00000256646	COSM132738
TNFRSF1B	rs1061622	MODERATE	NON_SYNONYMOUS_CODING	chr1	12252955	T	G	p.Met196Arg	0.722222	142		1	p.M196R	chr1:12252955	ENST00000376259	COSM146406
PRDM2		MODERATE	CODON_INSERTION	chr1	14106394	A	ACTC	p.Thr702X	0.96	1430		1	p.P703_A704insP	chr1:14106394	ENST00000311066	COSM112121
PDE4DIP	rs2762779	HIGH	STOP_GAINED	chr1	145075683	C	T	p.Trp60*	0.268293	61		1	p.W60*	chr1:145075683	ENST00000369345	COSM423677
NBPF14	rs141981140	MODERATE	NON_SYNONYMOUS_CODING	chr1	148009349	A	G	p.Met653Thr	0.53271	389		1	p.M653T	chr1:148009349	ENST00000369219	COSM1472554
MTMR11	rs11205303	MODERATE	NON_SYNONYMOUS_CODING	chr1	149906413	T	C	p.Met87Val	0.580645	194		1	p.M87V	chr1:149906413	ENST00000369140	COSM146598
CTSS	rs2230061	MODERATE	NON_SYNONYMOUS_CODING	chr1	150727539	G	A	p.Arg113Trp	0.418605	263		1	p.R113W	chr1:150727539	ENST00000368985	COSM146600	Activation_peptide
CERS2	rs267738	MODERATE	NON_SYNONYMOUS_CODING	chr1	150940625	T	G	p.Glu115Ala	0.571429	171		1	p.E115A	chr1:150940625	ENST00000368954	COSM1333906
CGN	rs12038198	MODERATE	NON_SYNONYMOUS_CODING	chr1	151497202	G	A	p.Arg485Gln	0.314815	119		1	p.R485Q	chr1:151497202	ENST00000271636	COSM146604
HRNR	rs61814935	MODERATE	NON_SYNONYMOUS_CODING	chr1	152187554	C	T	p.Ser2184Asn	0.369863	104		1	p.S2184N	chr1:152187554	ENST00000368801	COSM1317678
HRNR	rs6662450	MODERATE	NON_SYNONYMOUS_CODING	chr1	152191709	C	G	p.Ser799Thr	1	651		1	p.S799T	chr1:152191709	ENST00000368801	COSM1180639
HRNR	rs7520249	MODERATE	NON_SYNONYMOUS_CODING	chr1	152192114	C	T	p.Arg664Gln	0.98	1160		1	p.R664Q	chr1:152192114	ENST00000368801	COSM1334101
HRNR	rs7545406	MODERATE	NON_SYNONYMOUS_CODING	chr1	152193286	G	T	p.His273Gln	0.965517	968		1	p.H273Q	chr1:152193286	ENST00000368801	COSM146613
C1orf68	rs1332500	MODERATE	NON_SYNONYMOUS_CODING	chr1	152692074	G	C	p.Ser26Thr	0.342105	93		1	p.S26T	chr1:152692074	ENST00000368775	COSM146626
C1orf68	rs873775	MODERATE	NON_SYNONYMOUS_CODING	chr1	152692472	A	C	p.Thr159Pro	0.618182	316		1	p.T159P	chr1:152692472	ENST00000368775	COSM146627
DCST1	rs11264300	MODERATE	NON_SYNONYMOUS_CODING	chr1	155019710	A	C	p.Met512Leu	0.555556	261		1	p.M512L	chr1:155019710	ENST00000392480	COSM1559945	Extracellular
MIB2	rs12755088	HIGH	START_LOST	chr1	1558792	T	C	p.Met1Thr	1	255		1	p.?	chr1:1558792	ENST00000504599	COSM1559926
PMF1	rs1052067	MODERATE	NON_SYNONYMOUS_CODING	chr1	156206121	G	A	p.Met139Ile	0.423077	124		1	p.M137I	chr1:156206121	ENST00000368273	COSM424117
NES	rs2886443	MODERATE	NON_SYNONYMOUS_CODING	chr1	156640678	G	A	p.Pro1101Leu	0.422222	149		1	p.P1101L	chr1:156640678	ENST00000368223	COSM424142	Tail
NES	rs951781	MODERATE	NON_SYNONYMOUS_CODING	chr1	156641537	C	T	p.Val815Ile	0.46087	371		1	p.V815I	chr1:156641537	ENST00000368223	COSM146641	Tail
OR6Y1	rs41273491	MODERATE	NON_SYNONYMOUS_CODING	chr1	158517142	C	T	p.Val252Ile	0.681818	190		1	p.V252I	chr1:158517142	ENST00000302617	COSM170744	Transmembrane_region
OR6K3	rs857703	MODERATE	NON_SYNONYMOUS_CODING	chr1	158687224	G	A	p.Pro244Ser	0.5	223		1	p.P244S	chr1:158687224	ENST00000368146	COSM146654	Cytoplasmic
OR6N1	rs857824	MODERATE	NON_SYNONYMOUS_CODING	chr1	158735595	C	T	p.Arg293His	0.347826	87		1	p.R293H	chr1:158735595	ENST00000335094	COSM1179737	Cytoplasmic
OR6N1	rs857825	MODERATE	NON_SYNONYMOUS_CODING	chr1	158735691	T	C	p.Gln261Arg	0.463415	185		1	p.Q261R	chr1:158735691	ENST00000335094	COSM1179738	Extracellular
OR6N1	rs857827	MODERATE	NON_SYNONYMOUS_CODING	chr1	158735892	A	G	p.Ile194Thr	0.54717	269		1	p.I194T	chr1:158735892	ENST00000335094	COSM1559899	Extracellular
FCRLA	rs11746	MODERATE	NON_SYNONYMOUS_CODING	chr1	161683136	G	A	p.Arg372Gln	1	342		1	p.R349Q	chr1:161683136	ENST00000367959	COSM146669
NADK		MODERATE	NON_SYNONYMOUS_CODING	chr1	1687990	C	T	p.Asp296Asn	0.243902	74		1	p.D151N	chr1:1687990	ENST00000378625	COSM325905
FMO2	rs2020862	MODERATE	NON_SYNONYMOUS_CODING	chr1	171168584	C	T	p.Ser195Leu	0.512821	167		1	p.S195L	chr1:171168584	ENST00000441535	COSM146682
CROCC	rs9435793	MODERATE	NON_SYNONYMOUS_CODING	chr1	17265560	C	T	p.Pro511Ser	0.611111	199		1	p.P511S	chr1:17265560	ENST00000375541	COSM424610
TNN	rs116607864	MODERATE	NON_SYNONYMOUS_CODING	chr1	175092637	C	T	p.Arg918Cys	0.5	228		1	p.R918C	chr1:175092637	ENST00000239462	COSM1336423
TOR3A	rs2296377	MODERATE	NON_SYNONYMOUS_CODING	chr1	179051300	T	C	p.Phe13Leu	0.416667	82		1	p.F13L	chr1:179051300	ENST00000367627	COSM424690
APOBEC4	rs1174658	MODERATE	NON_SYNONYMOUS_CODING	chr1	183617105	A	G	p.Phe271Ser	0.421687	250		1	p.F271S	chr1:183617105	ENST00000308641	COSM424777
SWT1	rs12041704	MODERATE	NON_SYNONYMOUS_CODING	chr1	185240474	A	G	p.Asn821Asp	0.495413	387		1	p.N821D	chr1:185240474	ENST00000367501	COSM424793
HMCN1	rs10798035	MODERATE	NON_SYNONYMOUS_CODING	chr1	186050417	A	G	p.Glu2893Gly	0.45283	328		1	p.E2893G	chr1:186050417	ENST00000367492	COSM424810
KLHDC7A	rs2992752	MODERATE	NON_SYNONYMOUS_CODING	chr1	18808526	A	C	p.Thr351Pro	0.451613	145		1	p.T351P	chr1:18808526	ENST00000400664	COSM424852
CFH	rs1061170	MODERATE	NON_SYNONYMOUS_CODING	chr1	196659237	C	T	p.His402Tyr	0.537879	535		1	p.H402Y	chr1:196659237	ENST00000439155	COSM424915
C1orf106	rs45547233	MODERATE	NON_SYNONYMOUS_CODING	chr1	200880869	A	C	p.Arg501Ser	0.409091	101		1	p.R501S	chr1:200880869	ENST00000367342	COSM1337743
LGR6	rs788795	MODERATE	NON_SYNONYMOUS_CODING	chr1	202287206	T	C	p.Val592Ala	0.676923	330		1	p.V592fs*10	chr1:202287206	ENST00000367278	COSM1560333	Cytoplasmic
PLEKHA6	rs10900562	MODERATE	NON_SYNONYMOUS_CODING	chr1	204199614	C	T	p.Arg857Lys	1	390		1	p.R837K	chr1:204199614	ENST00000414478	COSM1338061
PLEKHA6	rs10900571	MODERATE	NON_SYNONYMOUS_CODING	chr1	204237416	C	T	p.Val43Ile	1	271		1	p.V43I	chr1:204237416	ENST00000414478	COSM1179739
VWA5B1	rs11582960	MODERATE	NON_SYNONYMOUS_CODING	chr1	20671961	G	A	p.Arg880His	0.571429	243		1	p.R880H	chr1:20671961	ENST00000375083	COSM1338396
LAMB3	rs2076349	MODERATE	NON_SYNONYMOUS_CODING	chr1	209800230	C	T	p.Val527Met	0.484848	428		1	p.V527M	chr1:209800230	ENST00000391911	COSM1338510
DIEXF	rs585627	MODERATE	NON_SYNONYMOUS_CODING	chr1	210004199	C	G	p.Gln67Glu	0.358974	110		1	p.Q67E	chr1:210004199	ENST00000491415	COSM1338527
USH2A	rs6657250	MODERATE	NON_SYNONYMOUS_CODING	chr1	216219781	A	G	p.Ile2106Thr	0.429752	347		1	p.I2106T	chr1:216219781	ENST00000366943	COSM146769
GPATCH2	rs35737297	MODERATE	NON_SYNONYMOUS_CODING	chr1	217604654	T	C	p.Met474Val	0.57377	294		1	p.M474V	chr1:217604654	ENST00000366935	COSM146772
NBPF3	rs1827293	MODERATE	NON_SYNONYMOUS_CODING	chr1	21795388	A	G	p.Tyr58Cys	0.707317	291		1	p.Y114C	chr1:21795388	ENST00000318220	COSM425331
HLX	rs12141189	MODERATE	NON_SYNONYMOUS_CODING	chr1	221053545	T	C	p.Ser116Pro	0.520833	207		1	p.S116P	chr1:221053545	ENST00000366903	COSM425363
LDLRAD2	rs10917051	MODERATE	NON_SYNONYMOUS_CODING	chr1	22141206	A	C	p.Asn134Thr	0.68	191		1	p.N134T	chr1:22141206	ENST00000543870	COSM425366	Extracellular
FAM177B	rs6683071	MODERATE	NON_SYNONYMOUS_CODING	chr1	222923351	A	G	p.Gln143Arg	0.4375	306		1	p.Q143R	chr1:222923351	ENST00000445590	COSM146785
TLR5	rs2072493	MODERATE	NON_SYNONYMOUS_CODING	chr1	223284599	T	C	p.Asn592Ser	0.375758	327		1	p.N592S	chr1:223284599	ENST00000540964	COSM146787
DNAH14	rs75827633	MODERATE	NON_SYNONYMOUS_CODING	chr1	225328440	T	G	p.Tyr1392Asp	0.421053	98		1	p.Y1392D	chr1:225328440	ENST00000439375	COSM904574
LEFTY1	rs41310561	MODERATE	NON_SYNONYMOUS_CODING	chr1	226076669	C	T	p.Arg33Gln	0.5	130		1	p.R33Q	chr1:226076669	ENST00000272134	COSM425442
SIPA1L2	rs1547742	MODERATE	NON_SYNONYMOUS_CODING	chr1	232568041	G	A	p.Ser477Leu	0.428571	166		1	p.S1403L	chr1:232568041	ENST00000308942	COSM1340113
LGALS8	rs1126407	MODERATE	NON_SYNONYMOUS_CODING	chr1	236700807	T	A	p.Phe19Tyr	1	949		1	p.F19Y	chr1:236700807	ENST00000529489	COSM146350
LGALS8	rs1041935	MODERATE	NON_SYNONYMOUS_CODING	chr1	236700857	C	T	p.Arg36Cys	1	1520		1	p.R36C	chr1:236700857	ENST00000529489	COSM146351
LGALS8	rs1041937	MODERATE	NON_SYNONYMOUS_CODING	chr1	236702210	A	G	p.Met56Val	1	766		1	p.M56V	chr1:236702210	ENST00000527974	COSM146352
KMO	rs1053230	MODERATE	NON_SYNONYMOUS_CODING	chr1	241755348	C	T	p.Arg452Cys	0.43299	290		1	p.R452C	chr1:241755348	ENST00000366559	COSM1179740
CNR2	rs2501432	MODERATE	NON_SYNONYMOUS_CODING	chr1	24201920	T	C	p.Gln63Arg	1	523		1	p.Q63R	chr1:24201920	ENST00000536471	COSM146448
PANK4	rs2494620	MODERATE	NON_SYNONYMOUS_CODING	chr1	2441358	T	C	p.Gln684Arg	0.72973	282		1	p.Q684R	chr1:2441358	ENST00000378466	COSM330287
OR2C3	rs6697472	MODERATE	NON_SYNONYMOUS_CODING	chr1	247695756	T	C	p.Thr20Ala	0.972222	445		1	p.T20fs*5	chr1:247695756	ENST00000366487	COSM390973	Extracellular
OR2G2	rs1151687	MODERATE	NON_SYNONYMOUS_CODING	chr1	247752019	G	C	p.Val120Leu	0.464286	131		1	p.V120L	chr1:247752019	ENST00000320065	COSM1178405
OR2W3		HIGH	FRAME_SHIFT	chr1	248059779	G	GA	p.X298X	0.611111	487		1	p.A300fs*>16	chr1:248059779	ENST00000360358	COSM128702	Cytoplasmic
OR2M2	rs4244171	MODERATE	NON_SYNONYMOUS_CODING	chr1	248343945	C	G	p.Arg220Gly	0.3	161		1	p.R220G	chr1:248343945	ENST00000359682	COSM1178407	Cytoplasmic
OR14C36	rs28377739	MODERATE	NON_SYNONYMOUS_CODING	chr1	248512749	G	A	p.Gly225Arg	1	1018		1	p.G225R	chr1:248512749	ENST00000317861	COSM1178408	Cytoplasmic
OR14C36	rs28545014	MODERATE	NON_SYNONYMOUS_CODING	chr1	248512767	G	T	p.Asp231Tyr	1	881		1	p.D231Y	chr1:248512767	ENST00000317861	COSM1178409	Cytoplasmic
OR2T4		HIGH	FRAME_SHIFT	chr1	248525638	CA	C	c.756*>-A	1	3070		1	p.I253L	chr1:248525638	ENST00000366475	COSM1191721	Cytoplasmic
RCAN3	rs196432	MODERATE	NON_SYNONYMOUS_CODING	chr1	24861704	G	A	p.Arg164Gln	0.756098	295		1	p.T221T	chr1:24861704	ENST00000412742	COSM1341222
OR2G6	rs9330305	MODERATE	NON_SYNONYMOUS_CODING	chr1	248685719	A	T	p.Met258Leu	0.702128	319		1	p.M258L	chr1:248685719	ENST00000343414	COSM146855	Transmembrane_region
OR2T11	rs28555577	MODERATE	NON_SYNONYMOUS_CODING	chr1	248789753	G	C	p.Pro226Arg	0.516129	166		1	p.P226L	chr1:248789753	ENST00000330803	COSM1158278	Cytoplasmic
TRIM63	rs2275950	MODERATE	NON_SYNONYMOUS_CODING	chr1	26385003	T	C	p.Lys237Glu	0.25	79		1	p.K237E	chr1:26385003	ENST00000374272	COSM146453
CD52	rs1071849	MODERATE	NON_SYNONYMOUS_CODING	chr1	26646726	A	G	p.Asn40Ser	1	927		1	p.N40S	chr1:26646726	ENST00000374213	COSM1180632
CD52	rs17645	MODERATE	NON_SYNONYMOUS_CODING	chr1	26646730	A	G	p.Ile41Met	1	809		1	p.I41M	chr1:26646730	ENST00000374213	COSM1180633	Removed_in_mature_form
COL16A1	rs2228552	MODERATE	NON_SYNONYMOUS_CODING	chr1	32165495	G	T	p.Thr62Lys	1	533		1	p.T62K	chr1:32165495	ENST00000373672	COSM1341749
MEGF6	rs2794340	MODERATE	NON_SYNONYMOUS_CODING	chr1	3496479	T	C	p.Ser131Gly	1	404		1	p.S131G	chr1:3496479	ENST00000356575	COSM1162425
RLF	rs10889205	MODERATE	NON_SYNONYMOUS_CODING	chr1	40705726	A	T	p.Glu1784Asp	0.697674	304		1	p.E1784D	chr1:40705726	ENST00000372771	COSM426263
MAST2	rs11211247	MODERATE	NON_SYNONYMOUS_CODING	chr1	46476587	T	G	p.Asp388Glu	0.211538	37		1	p.D388E	chr1:46476587	ENST00000361297	COSM1343092
CYP4B1		HIGH	FRAME_SHIFT	chr1	47280746	GAT	G	c.394*>-AT	0.684211	1281		1	p.D294fs*3	chr1:47280746	ENST00000452782	COSM1343170
CDCP2		HIGH	FRAME_SHIFT	chr1	54605319	G	GC	p.X408X	1	665		1	p.M409fs*>42	chr1:54605319	ENST00000371330	COSM291917
FGGY	rs835409	MODERATE	NON_SYNONYMOUS_CODING	chr1	59787350	T	G	p.Asn43Lys	0.270588	84		1	p.N43K	chr1:59787350	ENST00000371218	COSM146529
INADL	rs7516332	MODERATE	NON_SYNONYMOUS_CODING	chr1	62261168	A	G	p.Ile400Val	0.275862	86		1	p.I400V	chr1:62261168	ENST00000371158	COSM1126971
INADL	rs2498982	MODERATE	NON_SYNONYMOUS_CODING	chr1	62516683	G	C	p.Val33Leu	0.641509	321		1	p.V1360L	chr1:62516683	ENST00000545929	COSM146531
L1TD1	rs7542665	MODERATE	NON_SYNONYMOUS_CODING	chr1	62673037	T	C	p.Val246Ala	0.45098	203		1	p.V246A	chr1:62673037	ENST00000498273	COSM426542
TAS1R1	rs34160967	MODERATE	NON_SYNONYMOUS_CODING	chr1	6635306	G	A	p.Ala372Thr	0.822222	374		1	p.A372T	chr1:6635306	ENST00000333172	COSM1343925	Extracellular
CLCA4		MODERATE	CODON_DELETION	chr1	87045896	TCCTACA	T	p.X877X	1	2354		1	p.T886_P887delTP	chr1:87045896	ENST00000370563	COSM1317507
COL17A1	rs805722	MODERATE	NON_SYNONYMOUS_CODING	chr10	105810400	T	C	p.Met703Val	0.984375	786		1	p.M703V	chr10:105810400	ENST00000369733	COSM1178415
PSTK	rs3736582	MODERATE	NON_SYNONYMOUS_CODING	chr10	124742895	G	C	p.Gly206Arg	1	517		1	p.G206R	chr10:124742895	ENST00000406217	COSM147077
CTBP2		HIGH	FRAME_SHIFT	chr10	126678122	GT	G	c.1301*>-T	0.333333	332		1	p.K974fs*>12	chr10:126678122	ENST00000337195	COSM111429
DOCK1	rs869801	MODERATE	NON_SYNONYMOUS_CODING	chr10	129245684	G	A	p.Ala1793Thr	1	492		1	p.A1793T	chr10:129245684	ENST00000280333	COSM147088
MKI67	rs8473	MODERATE	NON_SYNONYMOUS_CODING	chr10	129899578	T	C	p.Lys3217Glu	1	493		1	p.K3217E	chr10:129899578	ENST00000368654	COSM1128106
MCM10	rs2274110	MODERATE	NON_SYNONYMOUS_CODING	chr10	13239651	A	G	p.Lys669Arg	0.259259	57		1	p.K669R	chr10:13239651	ENST00000484800	COSM146882
ARHGAP21	rs3748222	MODERATE	NON_SYNONYMOUS_CODING	chr10	24908686	T	C	p.Asn713Ser	0.326923	110		1	p.N712S	chr10:24908686	ENST00000396432	COSM146906
MYO3A	rs3740231	MODERATE	NON_SYNONYMOUS_CODING	chr10	26463043	A	T	p.Thr1284Ser	0.414414	299		1	p.T1284S	chr10:26463043	ENST00000265944	COSM146912
KIAA1462	rs2185724	MODERATE	NON_SYNONYMOUS_CODING	chr10	30316208	T	C	p.Arg957Gly	0.583333	218		1	p.R957G	chr10:30316208	ENST00000375377	COSM427458
FAM21C	rs201469599	MODERATE	NON_SYNONYMOUS_CODING	chr10	46246238	G	A	p.Ala295Thr	0.54023	318		1	p.A295T	chr10:46246238	ENST00000540872	COSM1317462
SYT15	rs3127785	MODERATE	NON_SYNONYMOUS_CODING	chr10	46965018	C	G	p.Glu362Asp	0.571429	181		1	p.E99Q	chr10:46965018	ENST00000374323	COSM146930
GPRIN2	rs4926046	MODERATE	NON_SYNONYMOUS_CODING	chr10	46999922	G	T	p.Val348Leu	0.458333	116		1	p.V348L	chr10:46999922	ENST00000374317	COSM1347901
FRMPD2	rs199919944	MODERATE	NON_SYNONYMOUS_CODING	chr10	49389016	T	C	p.Ser874Gly	1	263		1	p.S874G	chr10:49389016	ENST00000374201	COSM1474626
WDFY4	rs7097397	MODERATE	NON_SYNONYMOUS_CODING	chr10	50025396	G	A	p.Arg1816Gln	1	290		1	p.R1816Q	chr10:50025396	ENST00000325239	COSM1560763
AGAP6	rs75102885	MODERATE	NON_SYNONYMOUS_CODING	chr10	51748584	A	G	p.Arg37Gly	1	154		1	p.R37G	chr10:51748584	ENST00000412531	COSM1474650
AGAP6	rs61848260	MODERATE	NON_SYNONYMOUS_CODING	chr10	51748684	G	A	p.Arg70Gln	1	395		1	p.R70Q	chr10:51748684	ENST00000412531	COSM1505336
AGAP6		HIGH	FRAME_SHIFT	chr10	51768674	CAA	C	c.720*>-AA	1	1699		1	p.K264fs*10	chr10:51768674	ENST00000374056	COSM1317454
AKR1C4	rs17134592	MODERATE	NON_SYNONYMOUS_CODING	chr10	5260682	C	G	p.Leu311Val	0.402778	208		1	p.L311V	chr10:5260682	ENST00000380448	COSM146868
VPS26A	rs5030932	MODERATE	NON_SYNONYMOUS_CODING	chr10	70892791	C	T	p.Pro5Leu	1	917		1	p.S47S	chr10:70892791	ENST00000546041	COSM1241893
CDH23	rs17712523	MODERATE	NON_SYNONYMOUS_CODING	chr10	73537614	G	A	p.Val1680Ile	1	673		1	p.V1680I	chr10:73537614	ENST00000224721	COSM146951
ECD	rs2271904	MODERATE	NON_SYNONYMOUS_CODING	chr10	74894375	T	C	p.Asp667Gly	1	402		1	p.D634G	chr10:74894375	ENST00000430082	COSM146959
TAF3	rs4747647	MODERATE	NON_SYNONYMOUS_CODING	chr10	8006798	A	G	p.Asn442Ser	1	359		1	p.N442S	chr10:8006798	ENST00000344293	COSM427970
MMRN2	rs3750823	MODERATE	NON_SYNONYMOUS_CODING	chr10	88717154	C	T	p.Gly49Ser	1	464		1	p.G49S	chr10:88717154	ENST00000372027	COSM146986
EXOC6	rs2490741	MODERATE	NON_SYNONYMOUS_CODING	chr10	94594565	G	A	p.Val45Ile	0.965517	367		1	p.V24I	chr10:94594565	ENST00000371547	COSM146994
NOC3L	rs11187895	MODERATE	NON_SYNONYMOUS_CODING	chr10	96106240	G	C	p.Pro444Arg	0.98	631		1	p.P444R	chr10:96106240	ENST00000371361	COSM146998
MMS19	rs3740526	MODERATE	NON_SYNONYMOUS_CODING	chr10	99220707	C	T	p.Gly790Asp	1	417		1	p.G790D	chr10:99220707	ENST00000438925	COSM147015
ANKRD2	rs7094973	MODERATE	NON_SYNONYMOUS_CODING	chr10	99337572	G	A	p.Ala62Thr	1	344		1	p.A62T	chr10:99337572	ENST00000307518	COSM147016
MUC6	rs80333708	MODERATE	NON_SYNONYMOUS_CODING	chr11	1017069	G	A	p.Thr1911Met	0.340426	225		1	p.T1911M	chr11:1017069	ENST00000421673	COSM86091
EXPH5	rs2640738	MODERATE	NON_SYNONYMOUS_CODING	chr11	108464209	T	C	p.Arg19Gly	1	426		1	p.R19G	chr11:108464209	ENST00000265843	COSM147323	RabBD
ANKK1	rs4938016	MODERATE	NON_SYNONYMOUS_CODING	chr11	113270015	G	C	p.Gly442Arg	1	380		1	p.G442R	chr11:113270015	ENST00000303941	COSM428436
APOA4	rs5110	MODERATE	NON_SYNONYMOUS_CODING	chr11	116691634	C	A	p.Gln380His	1	299		1	p.Q380H	chr11:116691634	ENST00000357780	COSM1561077
OR10G9	rs11219413	MODERATE	NON_SYNONYMOUS_CODING	chr11	123894234	A	G	p.Gln172Arg	1	506		1	p.Q172R	chr11:123894234	ENST00000375024	COSM147358
CDON	rs3740912	MODERATE	NON_SYNONYMOUS_CODING	chr11	125891269	C	T	p.Val75Ile	1	673		1	p.V75I	chr11:125891269	ENST00000392693	COSM147377
KRTAP5-4	rs6578597	MODERATE	NON_SYNONYMOUS_CODING	chr11	1642884	A	C	p.Phe147Cys	1	539		1	p.F147C	chr11:1642884	ENST00000399682	COSM1127832
SLC6A5	rs1443548	MODERATE	NON_SYNONYMOUS_CODING	chr11	20623042	T	C	p.Phe124Ser	0.986842	892		1	p.F124S	chr11:20623042	ENST00000525748	COSM428827	Cytoplasmic
TRPM5	rs3986599	MODERATE	NON_SYNONYMOUS_CODING	chr11	2439542	A	G	p.Val256Ala	1	250		1	p.V254A	chr11:2439542	ENST00000452833	COSM428853
MUC15	rs15783	MODERATE	NON_SYNONYMOUS_CODING	chr11	26586801	G	A	p.Thr229Ile	0.666667	128		1	p.T202I	chr11:26586801	ENST00000529533	COSM1353293
ANO9	rs10794323	MODERATE	NON_SYNONYMOUS_CODING	chr11	428385	A	G	p.Cys399Arg	1	448		1	p.C399R	chr11:428385	ENST00000332826	COSM1561410	Cytoplasmic
OR52K1	rs96489	MODERATE	NON_SYNONYMOUS_CODING	chr11	4510285	A	G	p.Gln52Arg	1	624		1	p.Q52R	chr11:4510285	ENST00000307632	COSM147107	Cytoplasmic
LRP4	rs6485702	MODERATE	NON_SYNONYMOUS_CODING	chr11	46898771	T	C	p.Ile1086Val	1	839		1	p.I1086V	chr11:46898771	ENST00000378623	COSM147182	Extracellular
OR4C5		HIGH	FRAME_SHIFT	chr11	48387945	C	CCA	p.X24X	0.232759	1308		1	p.E25fs*4	chr11:48387945	ENST00000319813	COSM429097	Extracellular
FOLH1	rs75940285	MODERATE	NON_SYNONYMOUS_CODING	chr11	49208267	G	A	p.Arg190Trp	0.289474	86		1	p.R190W	chr11:49208267	ENST00000356696	COSM1132961
OR52A1	rs147169118	MODERATE	NON_SYNONYMOUS_CODING	chr11	5173229	C	T	p.Arg124His	1	327		1	p.R124H	chr11:5173229	ENST00000380367	COSM927831
UBQLN3	rs2227271	MODERATE	NON_SYNONYMOUS_CODING	chr11	5528918	C	T	p.Arg624Gln	1	341		1	p.R624Q	chr11:5528918	ENST00000311659	COSM429159	UBA
UBQLNL	rs2017433	MODERATE	NON_SYNONYMOUS_CODING	chr11	5536848	G	A	p.Ala275Val	1	506		1	p.A275V	chr11:5536848	ENST00000380184	COSM147120
OR1S1	rs2867400	MODERATE	NON_SYNONYMOUS_CODING	chr11	57982832	T	A	p.Leu206Met	1	372		1	p.L206M	chr11:57982832	ENST00000309433	COSM147242	Extracellular
OR4D6	rs1453544	MODERATE	NON_SYNONYMOUS_CODING	chr11	59224608	A	G	p.Met59Val	1	371		1	p.M59V	chr11:59224608	ENST00000300127	COSM1178424	Transmembrane_region
PRDX5	rs7938623	MODERATE	NON_SYNONYMOUS_CODING	chr11	64085785	A	G	p.Tyr33Cys	1	279		1	p.Y33C	chr11:64085785	ENST00000352435	COSM429533
MEN1	rs2959656	MODERATE	NON_SYNONYMOUS_CODING	chr11	64572018	T	C	p.Thr546Ala	1	313		1	p.T541A	chr11:64572018	ENST00000443283	COSM255213
DCHS1	rs4758443	MODERATE	NON_SYNONYMOUS_CODING	chr11	6648424	G	A	p.Thr1949Met	0.904762	228		1	p.T1949M	chr11:6648424	ENST00000299441	COSM1356235
UNC93B1		HIGH	SPLICE_SITE_ACCEPTOR	chr11	67765163	A	AG		1	902		1	p.F296fs*41	chr11:67765163	ENST00000227471	COSM1356479
TPCN2	rs3750965	MODERATE	NON_SYNONYMOUS_CODING	chr11	68840160	A	G	p.Lys376Arg	0.863636	232		1	p.K376R	chr11:68840160	ENST00000542467	COSM1356592
NADSYN1	rs7950441	MODERATE	NON_SYNONYMOUS_CODING	chr11	71184678	A	C	p.Gln204His	1	470		1	p.Q204delQ	chr11:71184678	ENST00000319023	COSM330166	CN_hydrolase
DEFB108B	rs7120658	MODERATE	NON_SYNONYMOUS_CODING	chr11	71548544	A	G	p.Gln53Arg	0.972973	417		1	p.Q53R	chr11:71548544	ENST00000328698	COSM232151
LIPT2	rs586088	MODERATE	NON_SYNONYMOUS_CODING	chr11	74203308	T	A	p.Thr190Ser	1	733		1	p.T190S	chr11:74203308	ENST00000310109	COSM147288
KIAA1731	rs7131178	MODERATE	NON_SYNONYMOUS_CODING	chr11	93462607	A	T	p.Glu617Val	1	307		1	p.E2437V	chr11:93462607	ENST00000531700	COSM1135271
MAML2		MODERATE	CODON_CHANGE_PLUS_CODON_DELETION	chr11	95825374	TTGCTGCTGC	T	p.X604Gln	0.921053	1728		1	p.Q604Q	chr11:95825374	ENST00000524717	COSM1561901
CLEC2A	rs526680	MODERATE	NON_SYNONYMOUS_CODING	chr12	10069302	C	T	p.Gly136Asp	1	372		1	p.G136D	chr12:10069302	ENST00000455827	COSM467639
KLRK1	rs2255336	MODERATE	NON_SYNONYMOUS_CODING	chr12	10532326	T	C	p.Thr72Ala	1	421		1	p.T72A	chr12:10532326	ENST00000540818	COSM430206
KLRC4	rs2617170	MODERATE	NON_SYNONYMOUS_CODING	chr12	10560957	T	C	p.Asn104Ser	1	711		1	p.N104S	chr12:10560957	ENST00000309384	COSM1358386	Extracellular
CCDC60	rs1064319	MODERATE	NON_SYNONYMOUS_CODING	chr12	119866533	A	G	p.Ile46Val	0.964286	640		1	p.I46V	chr12:119866533	ENST00000539847	COSM1162341
COQ5	rs3742049	MODERATE	NON_SYNONYMOUS_CODING	chr12	120954490	C	T	p.Ala152Thr	1	1358		1	p.A152T	chr12:120954490	ENST00000288532	COSM1162585
P2RX7	rs7958311	MODERATE	NON_SYNONYMOUS_CODING	chr12	121605355	G	A	p.Arg270His	1	390		1	p.R270H	chr12:121605355	ENST00000546057	COSM147626
WDR66		MODERATE	NON_SYNONYMOUS_CODING	chr12	122398579	G	A	p.Arg741His	1	911		1	p.R741H	chr12:122398579	ENST00000397454	COSM415991
HCAR3	rs56308926	MODERATE	NON_SYNONYMOUS_CODING	chr12	123200247	G	C	p.Ile346Met	1	384		1	p.I346M	chr12:123200247	ENST00000528880	COSM147628
HCAR3	rs1798192	MODERATE	NON_SYNONYMOUS_CODING	chr12	123200768	T	G	p.Thr173Pro	0.987342	975		1	p.T173P	chr12:123200768	ENST00000528880	COSM147629
CCDC92	rs11057401	MODERATE	NON_SYNONYMOUS_CODING	chr12	124427306	T	A	p.Ser70Cys	1	764		1	p.S70C	chr12:124427306	ENST00000539761	COSM1359878
MGP	rs4236	MODERATE	NON_SYNONYMOUS_CODING	chr12	15035081	T	C	p.Thr127Ala	1	689		1	p.T102A	chr12:15035081	ENST00000228938	COSM147452
TSPAN11	rs2075333	MODERATE	NON_SYNONYMOUS_CODING	chr12	31135579	T	C	p.Val190Ala	1	312		1	p.V190A	chr12:31135579	ENST00000546076	COSM431014
FAM186A	rs10876023	MODERATE	NON_SYNONYMOUS_CODING	chr12	50746917	A	G	p.Leu1233Pro	1	896		1	p.L1233P	chr12:50746917	ENST00000543111	COSM468488
KRT83	rs2857671	MODERATE	NON_SYNONYMOUS_CODING	chr12	52708420	G	A	p.His493Tyr	1	800		1	p.H493Y	chr12:52708420	ENST00000293670	COSM431333	Tail
KRT77	rs1567759	MODERATE	NON_SYNONYMOUS_CODING	chr12	53091566	C	A	p.Gly220Cys	0.982143	1295		1	p.G220C	chr12:53091566	ENST00000341809	COSM1362578
KRT76	rs6580904	MODERATE	NON_SYNONYMOUS_CODING	chr12	53165940	C	T	p.Ala359Thr	1	283		1	p.A359T	chr12:53165940	ENST00000332411	COSM1179681
ESPL1	rs1110719	MODERATE	NON_SYNONYMOUS_CODING	chr12	53681883	A	T	p.Lys1435Met	1	464		1	p.K1435M	chr12:53681883	ENST00000552462	COSM431383
ANO2	rs1860961	MODERATE	NON_SYNONYMOUS_CODING	chr12	5841733	A	C	p.Ser501Ala	0.604651	251		1	p.S500A	chr12:5841733	ENST00000546188	COSM147394
NCAPD2	rs143558583	MODERATE	NON_SYNONYMOUS_CODING	chr12	6639060	C	A	p.Ser1258Tyr	0.622222	253		1	p.S1258Y	chr12:6639060	ENST00000315579	COSM124685
PTPRQ	rs11114486	MODERATE	NON_SYNONYMOUS_CODING	chr12	80899901	C	A	p.Gln787Lys	0.989247	1161		1	p.Q787K	chr12:80899901	ENST00000266688	COSM468960
METTL25	rs4296098	MODERATE	NON_SYNONYMOUS_CODING	chr12	82792787	C	A	p.Gln249Lys	1	605		1	p.Q249fs*37	chr12:82792787	ENST00000248306	COSM1364546
ZNF705A	rs10743252	MODERATE	NON_SYNONYMOUS_CODING	chr12	8329676	C	T	p.Arg134Cys	1	374		1	p.R134C	chr12:8329676	ENST00000396570	COSM147415
FAM90A1		MODERATE	CODON_INSERTION	chr12	8374781	C	CACG	p.Thr344X	1	3070		1	p.T344_S345insV	chr12:8374781	ENST00000538603	COSM943980
A2ML1		HIGH	FRAME_SHIFT	chr12	9016562	GGC	G	c.2202*>-GC	0.9	905		1	p.A1226fs*34	chr12:9016562	ENST00000539547	COSM1476995
A2M	rs669	MODERATE	NON_SYNONYMOUS_CODING	chr12	9232268	T	C	p.Ile1000Val	1	436		1	p.E999fs*23	chr12:9232268	ENST00000318602	COSM1364843
CLYBL	rs3783185	MODERATE	NON_SYNONYMOUS_CODING	chr13	100518580	A	G	p.Ile241Val	1	544		1	p.I241V	chr13:100518580	ENST00000376360	COSM1179725
PABPC3		HIGH	FRAME_SHIFT	chr13	25671332	CA	C	c.996*>-A	0.322581	326		1	p.F335fs*19	chr13:25671332	ENST00000281589	COSM111561
FREM2	rs2496425	MODERATE	NON_SYNONYMOUS_CODING	chr13	39264690	T	C	p.Phe1070Ser	1	874		1	p.F1070S	chr13:39264690	ENST00000280481	COSM1366801
FREM2	rs9548509	MODERATE	NON_SYNONYMOUS_CODING	chr13	39430314	C	T	p.Thr2326Ile	1	592		1	p.T2326I	chr13:39430314	ENST00000280481	COSM432379
ELF1	rs1056820	MODERATE	NON_SYNONYMOUS_CODING	chr13	41515286	T	A	p.Thr343Ser	1	608		1	p.T343S	chr13:41515286	ENST00000239882	COSM1366878
ELF1	rs7799	MODERATE	NON_SYNONYMOUS_CODING	chr13	41533052	T	C	p.Asn58Ser	1	238		1	p.N58S	chr13:41533052	ENST00000442101	COSM1366882
ATP7B	rs732774	MODERATE	NON_SYNONYMOUS_CODING	chr13	52523808	C	T	p.Arg952Lys	0.951613	697		1	p.R952K	chr13:52523808	ENST00000418097	COSM147691
SLC25A47	rs35007880	MODERATE	NON_SYNONYMOUS_CODING	chr14	100795139	G	T	p.Arg135Leu	0.609524	480		1	p.R135L	chr14:100795139	ENST00000361529	COSM432666
RTL1	rs11623267	MODERATE	NON_SYNONYMOUS_CODING	chr14	101348584	C	G	p.Glu848Gln	0.571429	199		1	p.E848K	chr14:101348584	ENST00000534062	COSM432673
XRCC3	rs861539	MODERATE	NON_SYNONYMOUS_CODING	chr14	104165753	G	A	p.Thr36Met	0.305556	106		1	p.T241M	chr14:104165753	ENST00000554974	COSM1128325
INF2		MODERATE	CODON_DELETION	chr14	105173862	ACCCCACCCCCAC	A	p.X420Thr	0.666667	453		1	p.P427_P428delPP	chr14:105173862	ENST00000392634	COSM231516	Phosphothreonine
AHNAK2	rs2819419	MODERATE	NON_SYNONYMOUS_CODING	chr14	105406238	A	C	p.Tyr5184Asp	0.365079	159		1	p.Y154D	chr14:105406238	ENST00000333244	COSM147858
AHNAK2	rs4264326	MODERATE	NON_SYNONYMOUS_CODING	chr14	105411700	A	G	p.Val3363Ala	0.29703	117		1	p.V3363A	chr14:105411700	ENST00000333244	COSM1128312
AHNAK2	rs10438247	MODERATE	NON_SYNONYMOUS_CODING	chr14	105411781	G	A	p.Pro3336Leu	0.287671	109		1	p.P3336L	chr14:105411781	ENST00000333244	COSM432734
AHNAK2	rs2582514	MODERATE	NON_SYNONYMOUS_CODING	chr14	105413204	G	T	p.Arg2862Ser	0.320755	78		1	p.R2862S	chr14:105413204	ENST00000333244	COSM1368617
AHNAK2	rs72702027	MODERATE	NON_SYNONYMOUS_CODING	chr14	105414629	G	A	p.Pro2387Ser	0.318584	165		1	p.K2385fs*18	chr14:105414629	ENST00000333244	COSM111533
AHNAK2	rs55791176	MODERATE	NON_SYNONYMOUS_CODING	chr14	105418344	T	G	p.Glu1148Asp	0.4	232		1	p.E1148D	chr14:105418344	ENST00000333244	COSM1368638
AHNAK2	rs11625007	MODERATE	NON_SYNONYMOUS_CODING	chr14	105418391	C	T	p.Val1133Ile	0.55814	382		1	p.V1133I	chr14:105418391	ENST00000333244	COSM1368639
MTA1	rs4983413	MODERATE	NON_SYNONYMOUS_CODING	chr14	105930406	G	A	p.Val372Ile	0.712871	596		1	p.V372I	chr14:105930406	ENST00000406191	COSM147860
OR11G2		HIGH	FRAME_SHIFT	chr14	20666175	C	CA	p.X228X	0.522727	749		1	p.G230fs*74	chr14:20666175	ENST00000357366	COSM112052	Extracellular
TTC5	rs3742945	MODERATE	NON_SYNONYMOUS_CODING	chr14	20770036	T	C	p.Gln47Arg	0.255814	74		1	p.Q47R	chr14:20770036	ENST00000258821	COSM1179594
PNP	rs1049564	MODERATE	NON_SYNONYMOUS_CODING	chr14	20940606	G	A	p.Gly90Ser	0.324324	83		1	p.G51S	chr14:20940606	ENST00000553591	COSM147733
OR10G3	rs17792778	MODERATE	NON_SYNONYMOUS_CODING	chr14	22038659	T	C	p.Ser73Gly	0.414634	156		1	p.S73G	chr14:22038659	ENST00000303532	COSM1369062	Transmembrane_region
C14orf23		MODERATE	CODON_INSERTION	chr14	29261309	A	AAAC	p.Lys116X	0.415385	1487		1	p.K116_T117insQ	chr14:29261309	ENST00000399387	COSM1317865
SCFD1	rs229150	MODERATE	NON_SYNONYMOUS_CODING	chr14	31099738	A	G	p.Lys63Arg	0.274809	114		1	p.K63R	chr14:31099738	ENST00000458591	COSM432987
STRN3	rs2273171	MODERATE	NON_SYNONYMOUS_CODING	chr14	31381351	T	C	p.Asn471Ser	0.5	112		1	p.N387S	chr14:31381351	ENST00000357479	COSM147761
FSCB	rs11621923	MODERATE	NON_SYNONYMOUS_CODING	chr14	44974189	C	A	p.Ala668Ser	0.34375	85		1	p.A668S	chr14:44974189	ENST00000340446	COSM433069
FSCB	rs3825632	MODERATE	NON_SYNONYMOUS_CODING	chr14	44974922	A	T	p.Asp423Glu	0.411765	136		1	p.D423E	chr14:44974922	ENST00000340446	COSM433070
L2HGDH	rs2275591	MODERATE	NON_SYNONYMOUS_CODING	chr14	50778816	A	C	p.Leu18Arg	0.933333	589		1	p.L18R	chr14:50778816	ENST00000557131	COSM433105
ATP5S	rs2275592	MODERATE	NON_SYNONYMOUS_CODING	chr14	50788213	C	T	p.Pro18Leu	1	635		1	p.P18L	chr14:50788213	ENST00000426751	COSM147776
PYGL		HIGH	SPLICE_SITE_ACCEPTOR	chr14	51378590	CT	C		0.276471	1544		1	p.?	chr14:51378590	ENST00000531889	COSM1263632
FBXO34	rs1045002	MODERATE	NON_SYNONYMOUS_CODING	chr14	55818517	T	A	p.Ile470Asn	0.985915	877		1	p.I470N	chr14:55818517	ENST00000440021	COSM147784
FBXO34	rs3742569	MODERATE	NON_SYNONYMOUS_CODING	chr14	55818706	T	C	p.Leu533Pro	1	470		1	p.L533P	chr14:55818706	ENST00000440021	COSM147785
SYNE2	rs9944035	MODERATE	NON_SYNONYMOUS_CODING	chr14	64447776	T	C	p.Ile574Thr	0.243243	75		1	p.I574T	chr14:64447776	ENST00000554584	COSM1370479
MTHFD1	rs1950902	MODERATE	NON_SYNONYMOUS_CODING	chr14	64882380	A	G	p.Lys190Arg	1	1457		1	p.K134R	chr14:64882380	ENST00000545908	COSM1180585
FUT8	rs35949016	MODERATE	NON_SYNONYMOUS_CODING	chr14	66136163	C	A	p.His2Gln	0.227273	49		1	p.T267K	chr14:66136163	ENST00000417683	COSM147795
CCDC177	rs7494244	MODERATE	NON_SYNONYMOUS_CODING	chr14	70037611	A	T	p.Leu47Met	1	1759		1	p.L47M	chr14:70037611	ENST00000543986	COSM147805
TTC9	rs4902834	MODERATE	NON_SYNONYMOUS_CODING	chr14	71109153	C	G	p.Pro103Ala	1	204		1	p.P103A	chr14:71109153	ENST00000256367	COSM433314
DPF3		HIGH	FRAME_SHIFT	chr14	73079291	G	GAA	p.X189X	0.803922	2125		1	p.P190fs*>7	chr14:73079291	ENST00000540281	COSM1317843
SERPINA1	rs1303	MODERATE	NON_SYNONYMOUS_CODING	chr14	94844843	T	G	p.Glu400Asp	0.604651	254		1	p.E400D	chr14:94844843	ENST00000449399	COSM147838
SYNE3		MODERATE	CODON_CHANGE_PLUS_CODON_DELETION	chr14	95903307	TAGA	T	p.X795Leu	0.642857	415		1	p.L796delL	chr14:95903307	ENST00000334258	COSM214548	Cytoplasmic
ADAMTS17	rs2573652	MODERATE	NON_SYNONYMOUS_CODING	chr15	100514614	T	C	p.Asn1094Ser	1	685		1	p.N1094S	chr15:100514614	ENST00000268070	COSM1375652
ADAMTS17	rs7496668	MODERATE	NON_SYNONYMOUS_CODING	chr15	100821576	G	A	p.Ser216Leu	0.585106	427		1	p.S216L	chr15:100821576	ENST00000268070	COSM433588
LINS	rs8451	MODERATE	NON_SYNONYMOUS_CODING	chr15	101109677	C	A	p.Arg680Ser	0.414286	316		1	p.R680S	chr15:101109677	ENST00000314742	COSM147993
OR4M2	rs12593418	MODERATE	NON_SYNONYMOUS_CODING	chr15	22369290	A	G	p.Met239Val	0.210526	31		1	p.M239V	chr15:22369290	ENST00000332663	COSM147863	Transmembrane_region
OR4M2	rs4087943	MODERATE	NON_SYNONYMOUS_CODING	chr15	22369426	G	A	p.Arg284His	1	504		1	p.R284H	chr15:22369426	ENST00000332663	COSM1372009	Transmembrane_region
GOLGA6L2	rs12594944	MODERATE	NON_SYNONYMOUS_CODING	chr15	23687214	C	G	p.Arg235Pro	1	703		1	p.R235Q	chr15:23687214	ENST00000567107	COSM320626
NPAP1	rs1563102	MODERATE	NON_SYNONYMOUS_CODING	chr15	24921771	G	C	p.Gly253Arg	1	341		1	p.G253R	chr15:24921771	ENST00000329468	COSM433643
FMN1	rs2306277	MODERATE	NON_SYNONYMOUS_CODING	chr15	33357262	A	G	p.Leu686Pro	0.5	145		1	p.L463P	chr15:33357262	ENST00000559047	COSM147870
FMN1	rs11072170	MODERATE	NON_SYNONYMOUS_CODING	chr15	33359370	C	T	p.Gly239Glu	0.392157	160		1	p.G239E	chr15:33359370	ENST00000558197	COSM147871
RYR3		MODERATE	CODON_DELETION	chr15	34137079	TAGA	T	p.X4438Leu	0.611111	513		1	p.E4441delE	chr15:34137079	ENST00000389232	COSM111719
THBS1	rs2292305	MODERATE	NON_SYNONYMOUS_CODING	chr15	39880822	A	G	p.Thr523Ala	0.6	168		1	p.T523A	chr15:39880822	ENST00000260356	COSM147875
FSIP1	rs16969386	MODERATE	NON_SYNONYMOUS_CODING	chr15	39910052	C	G	p.Gly528Ala	0.532787	490		1	p.G528A	chr15:39910052	ENST00000350221	COSM147876
BAHD1	rs3803357	MODERATE	NON_SYNONYMOUS_CODING	chr15	40751555	C	A	p.Gln298Lys	1	393		1	p.Q298K	chr15:40751555	ENST00000561234	COSM433784
CASC5	rs7177192	MODERATE	NON_SYNONYMOUS_CODING	chr15	40898643	G	C	p.Arg43Thr	0.347222	161		1	p.R43T	chr15:40898643	ENST00000527044	COSM147880
CASC5	rs8040502	MODERATE	NON_SYNONYMOUS_CODING	chr15	40915190	A	G	p.Arg936Gly	0.526316	310		1	p.R936G	chr15:40915190	ENST00000346991	COSM147882
NUSAP1	rs7178634	MODERATE	NON_SYNONYMOUS_CODING	chr15	41634587	A	G	p.Thr33Ala	0.32381	139		1	p.T33A	chr15:41634587	ENST00000560747	COSM1129215
NUSAP1	rs7178777	MODERATE	NON_SYNONYMOUS_CODING	chr15	41634588	C	A	p.Thr33Asn	0.32381	134		1	p.T33N	chr15:41634588	ENST00000560747	COSM1129214
SPTBN5	rs1197665	MODERATE	NON_SYNONYMOUS_CODING	chr15	42143533	T	G	p.Asn3564Thr	1	502		1	p.N3564T	chr15:42143533	ENST00000320955	COSM147886
EHD4	rs11549015	MODERATE	NON_SYNONYMOUS_CODING	chr15	42235316	C	T	p.Val154Ile	0.514286	182		1	p.V154I	chr15:42235316	ENST00000220325	COSM147887
PLA2G4D	rs4924618	MODERATE	NON_SYNONYMOUS_CODING	chr15	42371752	A	T	p.Ser434Thr	1	670		1	p.S434T	chr15:42371752	ENST00000290472	COSM1162389
SPG11	rs3759871	MODERATE	NON_SYNONYMOUS_CODING	chr15	44943757	A	G	p.Phe463Ser	0.469388	191		1	p.F463S	chr15:44943757	ENST00000559193	COSM147894
SECISBP2L	rs34895054	MODERATE	NON_SYNONYMOUS_CODING	chr15	49285001	G	C	p.Pro916Ala	0.413462	271		1	p.P871A	chr15:49285001	ENST00000559471	COSM147902
HERC1	rs2229749	MODERATE	NON_SYNONYMOUS_CODING	chr15	63937209	C	G	p.Glu3722Asp	1	643		1	p.E3722D	chr15:63937209	ENST00000443617	COSM147938
HERC1	rs2228510	MODERATE	NON_SYNONYMOUS_CODING	chr15	63970456	T	C	p.Ile2220Val	0.395349	219		1	p.I2220V	chr15:63970456	ENST00000443617	COSM147939
HERC1	rs2255243	MODERATE	NON_SYNONYMOUS_CODING	chr15	63988357	C	G	p.Gly680Ala	1	779		1	p.G1696A	chr15:63988357	ENST00000561400	COSM147942
ANKDD1A	rs34988193	MODERATE	NON_SYNONYMOUS_CODING	chr15	65235776	A	G	p.Lys355Glu	1	536		1	p.K355E	chr15:65235776	ENST00000395720	COSM1129152
MYO9A	rs74475742	MODERATE	NON_SYNONYMOUS_CODING	chr15	72172798	G	A	p.Arg1905Cys	0.358333	206		1	p.R1834C	chr15:72172798	ENST00000424560	COSM162758
CD276	rs11574483	MODERATE	NON_SYNONYMOUS_CODING	chr15	73996066	G	A	p.Arg267His	0.354839	108		1	p.R267H	chr15:73996066	ENST00000561213	COSM434258
C15orf39	rs1873379	MODERATE	NON_SYNONYMOUS_CODING	chr15	75498744	G	C	p.Ala119Pro	0.555556	143		1	p.A119P	chr15:75498744	ENST00000567617	COSM434308
CHRNA3		MODERATE	CODON_DELETION	chr15	78913067	ACAG	A	p.Leu23X	0.4375	299		1	p.L23delL	chr15:78913067	ENST00000348639	COSM965405
TICRR	rs11629584	MODERATE	NON_SYNONYMOUS_CODING	chr15	90128966	C	T	p.Arg402Trp	1	624		1	p.R402W	chr15:90128966	ENST00000268138	COSM147976
TICRR	rs894157	MODERATE	NON_SYNONYMOUS_CODING	chr15	90168108	C	T	p.Arg1523Cys	1	584		1	p.R1523C	chr15:90168108	ENST00000268138	COSM147978
WDR93	rs7163367	MODERATE	NON_SYNONYMOUS_CODING	chr15	90260145	T	A	p.Ser254Thr	0.98913	1052		1	p.S254T	chr15:90260145	ENST00000560294	COSM1178437
GABARAPL3	rs2589973	MODERATE	NON_SYNONYMOUS_CODING	chr15	90892293	C	T	p.Arg46Lys	0.712121	459		1	p.R46K	chr15:90892293	ENST00000412799	COSM1517858
CIITA	rs4774	MODERATE	NON_SYNONYMOUS_CODING	chr16	11000848	G	C	p.Gly500Ala	0.746479	488		1	p.G500A	chr16:11000848	ENST00000324288	COSM434601	NACHT
PRM3	rs429744	MODERATE	NON_SYNONYMOUS_CODING	chr16	11367154	C	T	p.Arg100Gln	1	141		1	p.0?	chr16:11367154	ENST00000327157	COSM43332
TPSG1	rs11248860	MODERATE	NON_SYNONYMOUS_CODING	chr16	1272038	G	A	p.Thr239Ile	1	337		1	p.T239I	chr16:1272038	ENST00000234798	COSM434650
TPSD1	rs1800984	MODERATE	NON_SYNONYMOUS_CODING	chr16	1306355	T	C	p.Val25Ala	0.979167	552		1	p.V25A	chr16:1306355	ENST00000211076	COSM1563251
BFAR	rs11546303	MODERATE	NON_SYNONYMOUS_CODING	chr16	14742400	T	G	p.Met140Arg	0.456	372		1	p.M140R	chr16:14742400	ENST00000261658	COSM1376003	Cytoplasmic
CCP110	rs226891	MODERATE	NON_SYNONYMOUS_CODING	chr16	19547747	C	G	p.Ile252Met	1	710		1	p.I252M	chr16:19547747	ENST00000396212	COSM148034
BRICD5	rs26857	MODERATE	NON_SYNONYMOUS_CODING	chr16	2260567	C	T	p.Val46Ile	1	241		1	p.V46I	chr16:2260567	ENST00000566018	COSM329187
IL4R	rs1805015	MODERATE	NON_SYNONYMOUS_CODING	chr16	27374180	T	C	p.Ser503Pro	0.231884	43		1	p.S503P	chr16:27374180	ENST00000543915	COSM1377006
KIAA0556	rs12930355	MODERATE	NON_SYNONYMOUS_CODING	chr16	27720201	C	T	p.Thr522Met	0.758621	246		1	p.T522M	chr16:27720201	ENST00000261588	COSM50424
C16orf96	rs2450386	MODERATE	NON_SYNONYMOUS_CODING	chr16	4625938	A	T	p.Asp486Val	0.979167	535		1	p.D486V	chr16:4625938	ENST00000444310	COSM970736
ABCC12	rs7193955	MODERATE	NON_SYNONYMOUS_CODING	chr16	48122582	G	A	p.Arg1117Cys	1	1352		1	p.R1117C	chr16:48122582	ENST00000311303	COSM1378010
PPL	rs1049205	MODERATE	NON_SYNONYMOUS_CODING	chr16	4942099	C	T	p.Arg589Gln	1	532		1	p.R589Q	chr16:4942099	ENST00000345988	COSM435328
SALL1	rs13336129	MODERATE	NON_SYNONYMOUS_CODING	chr16	51175658	T	C	p.Ser62Gly	0.378378	121		1	p.S159G	chr16:51175658	ENST00000440970	COSM1128936
FAM86A	rs12928528	MODERATE	NON_SYNONYMOUS_CODING	chr16	5139186	G	C	p.His272Asp	1	549		1	p.H272D	chr16:5139186	ENST00000427587	COSM435375
MT1A	rs11640851	MODERATE	NON_SYNONYMOUS_CODING	chr16	56673227	C	A	p.Thr27Asn	1	849		1	p.T27S	chr16:56673227	ENST00000290705	COSM435404	Beta
GPR56	rs1801257	MODERATE	NON_SYNONYMOUS_CODING	chr16	57689385	C	G	p.Ser281Arg	0.961538	1391		1	p.S281R	chr16:57689385	ENST00000568909	COSM435429
PIGQ	rs710924	MODERATE	NON_SYNONYMOUS_CODING	chr16	633353	T	C	p.Cys668Arg	1	440		1	p.C668R	chr16:633353	ENST00000026218	COSM1128914
CDH5	rs1049970	MODERATE	NON_SYNONYMOUS_CODING	chr16	66432423	T	C	p.Ile517Thr	1	1239		1	p.I517T	chr16:66432423	ENST00000341529	COSM1128913
SLC7A6OS	rs3803650	MODERATE	NON_SYNONYMOUS_CODING	chr16	68344696	C	T	p.Gly45Asp	1	480		1	p.G45D	chr16:68344696	ENST00000263997	COSM435576
NQO1	rs1800566	MODERATE	NON_SYNONYMOUS_CODING	chr16	69745145	G	A	p.Pro187Ser	0.521739	99		1	p.P187S	chr16:69745145	ENST00000320623	COSM148097
PDPR	rs10852462	MODERATE	NON_SYNONYMOUS_CODING	chr16	70164334	A	G	p.Ile206Val	0.315068	119		1	p.I206V	chr16:70164334	ENST00000568530	COSM148098
HYDIN	rs7192347	MODERATE	NON_SYNONYMOUS_CODING	chr16	70896122	A	C	p.Met3869Arg	0.472222	140		1	p.M3820R	chr16:70896122	ENST00000393567	COSM148104
FTSJD1	rs3803704	MODERATE	NON_SYNONYMOUS_CODING	chr16	71318577	T	C	p.Asn416Ser	0.580645	193		1	p.N416S	chr16:71318577	ENST00000434935	COSM435711
ZNF23	rs2070832	MODERATE	NON_SYNONYMOUS_CODING	chr16	71487206	T	C	p.Ser28Gly	1	681		1	p.S28G	chr16:71487206	ENST00000497160	COSM148109
IST1		MODERATE	CODON_DELETION	chr16	71956511	AATGCCC	A	p.X82X	0.609756	1157		1	p.P231P	chr16:71956511	ENST00000538850	COSM1563508
DHODH	rs3213422	MODERATE	NON_SYNONYMOUS_CODING	chr16	72042682	A	C	p.Lys7Gln	1	636		1	p.K7Q	chr16:72042682	ENST00000572887	COSM1379664
CNTNAP4	rs7202925	MODERATE	NON_SYNONYMOUS_CODING	chr16	76587202	T	G	p.Asp1158Glu	0.423077	123		1	p.D1082E	chr16:76587202	ENST00000476707	COSM148119
KIAA1609	rs436278	MODERATE	NON_SYNONYMOUS_CODING	chr16	84522897	G	C	p.Asp172Glu	0.410256	147		1	p.D172E	chr16:84522897	ENST00000343629	COSM1128850
CRISPLD2	rs721005	MODERATE	NON_SYNONYMOUS_CODING	chr16	84906098	C	G	p.Thr322Ser	0.5	286		1	p.T322S	chr16:84906098	ENST00000564567	COSM148136
CBFA2T3	rs61734177	MODERATE	NON_SYNONYMOUS_CODING	chr16	88964557	C	G	p.Arg42Pro	0.434783	115		1	p.R103P	chr16:88964557	ENST00000564416	COSM435927
ACSF3	rs3743979	MODERATE	NON_SYNONYMOUS_CODING	chr16	89180883	G	A	p.Val372Met	1	1271		1	p.V372M	chr16:89180883	ENST00000406948	COSM435928
ZNF778	rs9921361	MODERATE	NON_SYNONYMOUS_CODING	chr16	89294439	G	T	p.Gln553His	0.461538	166		1	p.Q553H	chr16:89294439	ENST00000433976	COSM1380494
TRIM16	rs148027903	MODERATE	NON_SYNONYMOUS_CODING	chr17	15554604	G	A	p.Pro107Leu	1	381		1	p.P107L	chr17:15554604	ENST00000578237	COSM401683
RAI1	rs11649804	MODERATE	NON_SYNONYMOUS_CODING	chr17	17696755	C	A	p.Pro165Thr	0.941176	498		1	p.P165T	chr17:17696755	ENST00000353383	COSM436133
LLGL1	rs2290505	MODERATE	NON_SYNONYMOUS_CODING	chr17	18137141	A	G	p.Ser148Gly	1	317		1	p.S148G	chr17:18137141	ENST00000316843	COSM1563388
MAP2K3	rs56067280	MODERATE	NON_SYNONYMOUS_CODING	chr17	21204187	G	T	p.Arg94Leu	0.6	244		1	p.R98L	chr17:21204187	ENST00000342679	COSM288153	Protein_kinase
KCNJ12	rs1657738	MODERATE	NON_SYNONYMOUS_CODING	chr17	21318698	C	T	p.Ser15Leu	0.231707	53		1	p.S15L	chr17:21318698	ENST00000583088	COSM436188
KCNJ12		MODERATE	CODON_DELETION	chr17	21319650	CGAG	C	p.Glu333X	0.50885	3070		1	p.E333delE	chr17:21319650	ENST00000583088	COSM278475
SLC13A2	rs11567842	MODERATE	NON_SYNONYMOUS_CODING	chr17	26824156	A	G	p.Ile599Val	0.444444	166		1	p.I550V	chr17:26824156	ENST00000444914	COSM148219
NF1	rs2525574	HIGH	STOP_LOST	chr17	29705947	T	C	p.*639Arg	0.405405	224	2A	1	p.?	chr17:29705947	ENST00000444181	COSM43283
SLFN12	rs1849733	MODERATE	NON_SYNONYMOUS_CODING	chr17	33749919	A	C	p.Ser43Arg	1	1022		1	p.S43R	chr17:33749919	ENST00000452764	COSM1179770
SYNRG	rs12602536	MODERATE	NON_SYNONYMOUS_CODING	chr17	35937637	T	C	p.Thr222Ala	0.411765	272		1	p.T222A	chr17:35937637	ENST00000346661	COSM1128746
GSG2	rs3809806	MODERATE	NON_SYNONYMOUS_CODING	chr17	3628362	T	C	p.Val378Ala	1	618		1	p.V378A	chr17:3628362	ENST00000325418	COSM1128744
PLXDC1	rs114297422	MODERATE	NON_SYNONYMOUS_CODING	chr17	37296025	C	T	p.Arg46Gln	0.553191	243		1	p.R46Q	chr17:37296025	ENST00000394316	COSM1318513
KRTAP1-5		HIGH	FRAME_SHIFT	chr17	39183011	AG	A	c.395*>-G	0.333333	266		1	p.C133fs*4	chr17:39183011	ENST00000361883	COSM328004
KRTAP4-11	rs349771	MODERATE	NON_SYNONYMOUS_CODING	chr17	39274069	G	C	p.Arg167Gly	0.404255	132		1	p.R167fs*>29	chr17:39274069	ENST00000391413	COSM1192022
KRTAP4-3	rs12953139	MODERATE	NON_SYNONYMOUS_CODING	chr17	39324333	T	A	p.Gln31Leu	0.310811	91		1	p.Q31L	chr17:39324333	ENST00000391356	COSM1479554
KRT34	rs2239710	MODERATE	NON_SYNONYMOUS_CODING	chr17	39535859	A	G	p.Ile280Thr	1	352		1	p.I280T	chr17:39535859	ENST00000394001	COSM1383139
KRT37	rs9910204	MODERATE	NON_SYNONYMOUS_CODING	chr17	39580739	C	A	p.Gly13Cys	0.5	96		1	p.G13C	chr17:39580739	ENST00000225550	COSM436577	Head
HSD17B1	rs605059	MODERATE	NON_SYNONYMOUS_CODING	chr17	40706906	G	A	p.Gly314Ser	0.6	35		1	p.G313S	chr17:40706906	ENST00000225929	COSM436638
COASY	rs615942	MODERATE	NON_SYNONYMOUS_CODING	chr17	40714804	C	A	p.Ser84Tyr	0.366667	90		1	p.S55Y	chr17:40714804	ENST00000590958	COSM1383389
BRCA1	rs799917	MODERATE	NON_SYNONYMOUS_CODING	chr17	41244936	G	A	p.Pro871Leu	0.377049	165	2B	1	p.P871L	chr17:41244936	ENST00000471181	COSM148278
ASB16	rs7218599	MODERATE	NON_SYNONYMOUS_CODING	chr17	42248346	A	T	p.Gln63His	1	1029		1	p.Q63H	chr17:42248346	ENST00000293414	COSM436689
MAPT	rs2258689	MODERATE	NON_SYNONYMOUS_CODING	chr17	44067382	T	C	p.Tyr441His	0.391304	138		1	p.Y441H	chr17:44067382	ENST00000571987	COSM1128677
KANSL1	rs34579536	MODERATE	NON_SYNONYMOUS_CODING	chr17	44108906	A	G	p.Ile379Thr	0.583333	300		1	p.I1085T	chr17:44108906	ENST00000393476	COSM1383841
EFCAB13	rs72825679	MODERATE	NON_SYNONYMOUS_CODING	chr17	45468842	A	T	p.Asp541Val	0.404494	249		1	p.D541V	chr17:45468842	ENST00000331493	COSM148288
SKAP1	rs2278868	MODERATE	NON_SYNONYMOUS_CODING	chr17	46262171	C	T	p.Gly161Ser	0.907895	749		1	p.G161S	chr17:46262171	ENST00000584924	COSM1179686
CALCOCO2	rs550510	MODERATE	NON_SYNONYMOUS_CODING	chr17	46926615	G	A	p.Gly68Glu	0.552632	220		1	p.G140E	chr17:46926615	ENST00000508679	COSM148292
GIP	rs2291725	MODERATE	NON_SYNONYMOUS_CODING	chr17	47039132	T	C	p.Ser103Gly	1	702		1	p.S103G	chr17:47039132	ENST00000357424	COSM148293
XYLT2	rs6504649	MODERATE	NON_SYNONYMOUS_CODING	chr17	48437456	C	G	p.Thr801Arg	0.45122	250		1	p.T801R	chr17:48437456	ENST00000017003	COSM1384191	Lumenal
EPN3	rs4794159	MODERATE	NON_SYNONYMOUS_CODING	chr17	48619249	C	A	p.Pro572Thr	0.5625	383		1	p.P544T	chr17:48619249	ENST00000537145	COSM436852
SPATA20	rs8065903	MODERATE	NON_SYNONYMOUS_CODING	chr17	48629458	A	G	p.Lys625Arg	0.985075	794		1	p.K625R	chr17:48629458	ENST00000006658	COSM330349
NLRP1	rs12150220	MODERATE	NON_SYNONYMOUS_CODING	chr17	5485367	A	T	p.Leu155His	1	391		1	p.L155H	chr17:5485367	ENST00000577119	COSM1130227
OR4D2	rs80043692	MODERATE	NON_SYNONYMOUS_CODING	chr17	56247306	G	C	p.Cys97Ser	0.57971	606		1	p.C97S	chr17:56247306	ENST00000545221	COSM1318468
DCAF7		HIGH	SPLICE_SITE_ACCEPTOR	chr17	61660889	CG	C		0.981481	1861		1	p.?	chr17:61660889	ENST00000310827	COSM1385170
SCN4A	rs2058194	MODERATE	NON_SYNONYMOUS_CODING	chr17	62020348	T	C	p.Asn1376Asp	1	875		1	p.N1376D	chr17:62020348	ENST00000578147	COSM148318
KIAA0753	rs2289643	MODERATE	NON_SYNONYMOUS_CODING	chr17	6515454	C	T	p.Asp444Asn	1	332		1	p.D444N	chr17:6515454	ENST00000361413	COSM1130191
C17orf58	rs9891146	MODERATE	NON_SYNONYMOUS_CODING	chr17	65988049	T	C	p.Ile92Val	0.444444	112		1	p.I92V	chr17:65988049	ENST00000449250	COSM148320
AC079210.1	rs2286562	MODERATE	NON_SYNONYMOUS_CODING	chr17	66539847	C	T	p.Leu36Phe	0.467213	388		1	p.E245E	chr17:66539847	ENST00000600820	COSM148324
TTYH2	rs35999669	MODERATE	NON_SYNONYMOUS_CODING	chr17	72240177	T	G	p.Ser265Ala	0.65	169		1	p.S265A	chr17:72240177	ENST00000269346	COSM437296	Extracellular
KIF19	rs2271535	MODERATE	NON_SYNONYMOUS_CODING	chr17	72350412	G	A	p.Arg807His	0.5	151		1	p.R807H	chr17:72350412	ENST00000389916	COSM437309
CD300E	rs1878061	MODERATE	NON_SYNONYMOUS_CODING	chr17	72610089	C	T	p.Gly199Arg	0.333333	109		1	p.G158R	chr17:72610089	ENST00000426295	COSM148340
MRPS7	rs8075276	MODERATE	NON_SYNONYMOUS_CODING	chr17	73257986	C	T	p.Ala2Val	0.638889	229		1	p.A2V	chr17:73257986	ENST00000579761	COSM437370
UBE2O	rs3803739	MODERATE	NON_SYNONYMOUS_CODING	chr17	74387284	C	T	p.Gly1207Ser	0.96	305		1	p.G1207S	chr17:74387284	ENST00000319380	COSM148348
MGAT5B	rs571264	MODERATE	NON_SYNONYMOUS_CODING	chr17	74878259	G	A	p.Val81Ile	0.448276	121		1	p.V70I	chr17:74878259	ENST00000428789	COSM1386264
DNAH17	rs9896398	MODERATE	NON_SYNONYMOUS_CODING	chr17	76503593	T	C	p.Thr1508Ala	0.981818	656		1	p.T1508A	chr17:76503593	ENST00000585328	COSM148354
RNF213	rs8082521	MODERATE	NON_SYNONYMOUS_CODING	chr17	78302157	C	A	p.Gln1182Lys	1	521		1	p.Q1182K	chr17:78302157	ENST00000508628	COSM148362
BAIAP2	rs4969391	MODERATE	NON_SYNONYMOUS_CODING	chr17	79089590	A	G	p.Gln519Arg	0.435644	276		1	p.Q519R	chr17:79089590	ENST00000428708	COSM1387194
BAHCC1	rs7213444	MODERATE	NON_SYNONYMOUS_CODING	chr17	79414307	A	G	p.Thr1137Ala	1	196		1	p.T1137A	chr17:79414307	ENST00000307745	COSM437778
NPLOC4	rs4073997	MODERATE	NON_SYNONYMOUS_CODING	chr17	79526402	G	C	p.Ala35Gly	0.47619	115		1	p.G570G	chr17:79526402	ENST00000573876	COSM437787
TSPAN10		HIGH	FRAME_SHIFT	chr17	79614932	TTAAC	T	c.680*>-TAAC	0.393939	1199		1	p.?	chr17:79614932	ENST00000328585	COSM1480170
TBCD	rs3785522	MODERATE	NON_SYNONYMOUS_CODING	chr17	80895933	A	G	p.Glu1135Gly	0.610169	301		1	p.E1097G	chr17:80895933	ENST00000539345	COSM437857
ODF4	rs12601097	MODERATE	NON_SYNONYMOUS_CODING	chr17	8243661	G	A	p.Val98Met	1	538		1	p.V98M	chr17:8243661	ENST00000328248	COSM148189	Transmembrane_region
WDR16	rs6503235	MODERATE	NON_SYNONYMOUS_CODING	chr17	9515777	G	A	p.Glu346Lys	0.96875	398		1	p.E336K	chr17:9515777	ENST00000299764	COSM148192
ANKRD62	rs1986751	MODERATE	NON_SYNONYMOUS_CODING	chr18	12096249	G	T	p.Ala188Ser	1	481		1	p.A174S	chr18:12096249	ENST00000586406	COSM437906
ANKRD62	rs7243248	MODERATE	NON_SYNONYMOUS_CODING	chr18	12125657	G	A	p.Ala599Thr	0.904762	238		1	p.A599T	chr18:12125657	ENST00000314074	COSM437908
POTEC	rs45469098	MODERATE	NON_SYNONYMOUS_CODING	chr18	14542890	G	C	p.His86Asp	0.679487	455		1	p.H86D	chr18:14542890	ENST00000358970	COSM1522593
POTEC	rs28535987	MODERATE	NON_SYNONYMOUS_CODING	chr18	14543139	T	C	p.Thr3Ala	1	181		1	p.T3A	chr18:14543139	ENST00000358970	COSM1522590
MYOM1	rs1071600	MODERATE	NON_SYNONYMOUS_CODING	chr18	3126811	A	G	p.Ile960Thr	1	643		1	p.I960T	chr18:3126811	ENST00000400569	COSM148375
SLC14A2	rs9960464	MODERATE	NON_SYNONYMOUS_CODING	chr18	43246156	G	A	p.Arg510Gln	1	555		1	p.R510Q	chr18:43246156	ENST00000586448	COSM148424
SERPINB10	rs963075	MODERATE	NON_SYNONYMOUS_CODING	chr18	61600384	C	T	p.Arg246Cys	0.993056	1727		1	p.R246C	chr18:61600384	ENST00000238508	COSM1389512
CD226	rs763361	MODERATE	NON_SYNONYMOUS_CODING	chr18	67531642	T	C	p.Ser307Gly	1	328		1	p.S307G	chr18:67531642	ENST00000582621	COSM1179777	Cytoplasmic
NFATC1	rs754093	MODERATE	NON_SYNONYMOUS_CODING	chr18	77246406	T	G	p.Cys751Gly	1	398		1	p.C738G	chr18:77246406	ENST00000427363	COSM438403
RDH8	rs1122206	MODERATE	NON_SYNONYMOUS_CODING	chr19	10129552	C	G	p.His156Gln	1	363		1	p.H136Q	chr19:10129552	ENST00000591589	COSM1130021
OR7A10	rs12972670	MODERATE	NON_SYNONYMOUS_CODING	chr19	14952238	A	G	p.Met151Thr	1	776		1	p.M151T	chr19:14952238	ENST00000248058	COSM1390995
SLC1A6	rs3746295	MODERATE	NON_SYNONYMOUS_CODING	chr19	15083693	C	A	p.Ala15Ser	1	210		1	p.L10L	chr19:15083693	ENST00000430939	COSM438761
CYP4F12	rs609290	HIGH	SPLICE_SITE_DONOR	chr19	15789140	A	G		1	675		1	p.I90V	chr19:15789140	ENST00000517734	COSM1180581
OR10H3	rs2240228	MODERATE	NON_SYNONYMOUS_CODING	chr19	15852872	G	A	p.Val224Met	1	572		1	p.V224M	chr19:15852872	ENST00000305892	COSM148527	Cytoplasmic
GDF15	rs1059519	MODERATE	NON_SYNONYMOUS_CODING	chr19	18497024	G	C	p.Val9Leu	1	173		1	p.V9L	chr19:18497024	ENST00000595973	COSM137684
CSNK1G2	rs148408595	MODERATE	NON_SYNONYMOUS_CODING	chr19	1979811	A	G	p.Thr355Ala	0.971429	426		1	p.T355A	chr19:1979811	ENST00000255641	COSM98884
ZNF85	rs56231962	MODERATE	NON_SYNONYMOUS_CODING	chr19	21131664	G	T	p.Arg82Ile	1	337		1	p.R115I	chr19:21131664	ENST00000345030	COSM120047
ZNF738	rs1142653	MODERATE	NON_SYNONYMOUS_CODING	chr19	21544571	G	A	p.Asp3Asn	1	303		1	p.D3N	chr19:21544571	ENST00000597810	COSM474428
ZNF30	rs10422961	MODERATE	NON_SYNONYMOUS_CODING	chr19	35422808	C	T	p.Ser24Phe	0.987805	987		1	p.S24F	chr19:35422808	ENST00000601957	COSM1392764
ZNF573	rs3095726	MODERATE	NON_SYNONYMOUS_CODING	chr19	38229824	T	C	p.Met523Val	1	540		1	p.M465V	chr19:38229824	ENST00000590414	COSM1393266
LGALS14	rs4830	MODERATE	NON_SYNONYMOUS_CODING	chr19	40197924	T	C	p.Cys96Arg	1	1932		1	p.C96R	chr19:40197924	ENST00000360675	COSM148619
LGALS14	rs10755	MODERATE	NON_SYNONYMOUS_CODING	chr19	40199914	C	G	p.Phe156Leu	0.95	650		1	p.F156L	chr19:40199914	ENST00000360675	COSM148620
CLC	rs17608	MODERATE	NON_SYNONYMOUS_CODING	chr19	40225646	G	A	p.Ala28Val	1	435		1	p.A28V	chr19:40225646	ENST00000221804	COSM148621
FCGBP	rs144966876	MODERATE	NON_SYNONYMOUS_CODING	chr19	40368683	C	T	p.Arg4222His	0.507937	206		1	p.R4222H	chr19:40368683	ENST00000221347	COSM1252292
FCGBP	rs149844303	MODERATE	NON_SYNONYMOUS_CODING	chr19	40392802	C	T	p.Ala2568Thr	0.642857	99		1	p.A2568T	chr19:40392802	ENST00000221347	COSM1481054
PRX	rs146789340	MODERATE	NON_SYNONYMOUS_CODING	chr19	40902776	C	G	p.Glu495Gln	0.976471	957		1	p.E495Q	chr19:40902776	ENST00000324001	COSM1393815
B3GNT8	rs284662	MODERATE	NON_SYNONYMOUS_CODING	chr19	41932275	T	C	p.Ser137Gly	1	325		1	p.S137G	chr19:41932275	ENST00000321702	COSM439593	Lumenal
PSG2	rs77035666	MODERATE	NON_SYNONYMOUS_CODING	chr19	43575905	C	T	p.Arg304His	1	773		1	p.R304H	chr19:43575905	ENST00000406487	COSM328447
ZNF283	rs2356437	MODERATE	NON_SYNONYMOUS_CODING	chr19	44352665	T	C	p.Cys638Arg	1	1206		1	p.C638R	chr19:44352665	ENST00000324461	COSM1394329
ZNF45	rs399098	MODERATE	NON_SYNONYMOUS_CODING	chr19	44418824	C	T	p.Arg255Lys	1	420		1	p.R255K	chr19:44418824	ENST00000589703	COSM1178459
BCAM	rs1135062	MODERATE	NON_SYNONYMOUS_CODING	chr19	45322744	A	G	p.Thr539Ala	1	287		1	p.T539A	chr19:45322744	ENST00000391955	COSM1179785
ELSPBP1	rs2303690	MODERATE	NON_SYNONYMOUS_CODING	chr19	48525507	G	A	p.Glu51Lys	1	689		1	p.E199K	chr19:48525507	ENST00000597519	COSM1179786
PLIN3	rs8289	MODERATE	NON_SYNONYMOUS_CODING	chr19	4859937	T	C	p.Ile56Val	0.980769	630		1	p.I56V	chr19:4859937	ENST00000592528	COSM439886
DHDH	rs2270941	MODERATE	NON_SYNONYMOUS_CODING	chr19	49438363	G	A	p.Ser66Asn	1	293		1	p.S66N	chr19:49438363	ENST00000523250	COSM439936
SIGLEC12	rs3829658	MODERATE	NON_SYNONYMOUS_CODING	chr19	52000672	G	A	p.Thr478Met	1	690		1	p.T478M	chr19:52000672	ENST00000291707	COSM148702	Extracellular
SIGLEC12	rs3810110	MODERATE	NON_SYNONYMOUS_CODING	chr19	52004743	G	A	p.Ala82Val	1	1479		1	p.A82V	chr19:52004743	ENST00000291707	COSM148704
SIGLEC12		HIGH	FRAME_SHIFT	chr19	52004791	G	GC	p.X66X	0.984615	3070		1	p.A66fs*50	chr19:52004791	ENST00000291707	COSM329048
FPR1	rs5030880	MODERATE	NON_SYNONYMOUS_CODING	chr19	52249680	T	A	p.Arg190Trp	0.984848	738		1	p.R190W	chr19:52249680	ENST00000595042	COSM148707
ZNF480		HIGH	FRAME_SHIFT	chr19	52803669	CTG	C	c.4*>-TG	0.986111	3070		1	p.L2R	chr19:52803669	ENST00000334564	COSM1172653
ZNF611	rs4085566	MODERATE	NON_SYNONYMOUS_CODING	chr19	53209553	G	A	p.Pro252Leu	1	1030		1	p.P252L	chr19:53209553	ENST00000543227	COSM148721
LENG9	rs10406453	MODERATE	NON_SYNONYMOUS_CODING	chr19	54974318	T	C	p.His153Arg	1	559		1	p.H131R	chr19:54974318	ENST00000333834	COSM440281
LILRB1	rs1061681	MODERATE	NON_SYNONYMOUS_CODING	chr19	55143491	G	T	p.Ser191Ile	0.972973	1220		1	p.S155I	chr19:55143491	ENST00000427581	COSM1396328
KIR3DL3	rs270790	MODERATE	NON_SYNONYMOUS_CODING	chr19	55239223	G	A	p.Val168Ile	0.985294	826		1	p.V168I	chr19:55239223	ENST00000291860	COSM1396341
KIR3DL3	rs602444	MODERATE	NON_SYNONYMOUS_CODING	chr19	55246731	C	T	p.His321Tyr	1	902		1	p.H321N	chr19:55246731	ENST00000291860	COSM440288	Extracellular
KIR3DL3	rs662386	MODERATE	NON_SYNONYMOUS_CODING	chr19	55246741	T	C	p.Val324Ala	1	1001		1	p.V324A	chr19:55246741	ENST00000291860	COSM321264	Transmembrane_region
KIR2DL3	rs673568	MODERATE	NON_SYNONYMOUS_CODING	chr19	55253552	T	A	p.Phe66Tyr	0.503876	781		1	p.F66Y	chr19:55253552	ENST00000434419	COSM321259
KIR2DL3	rs77694681	MODERATE	NON_SYNONYMOUS_CODING	chr19	55255377	C	T	p.Arg169Cys	0.548148	501		1	p.R169C	chr19:55255377	ENST00000434419	COSM321260
RFPL4A	rs75239380	MODERATE	NON_SYNONYMOUS_CODING	chr19	56274453	G	A	p.Gly259Glu	0.516509	1110		1	p.G259E	chr19:56274453	ENST00000434937	COSM148754
ZNF470	rs10421285	MODERATE	NON_SYNONYMOUS_CODING	chr19	57085769	G	C	p.Val23Leu	1	550		1	p.V23L	chr19:57085769	ENST00000601902	COSM148776
ZNF470	rs4801177	MODERATE	NON_SYNONYMOUS_CODING	chr19	57089050	C	T	p.Thr418Ile	1	756		1	p.T418I	chr19:57089050	ENST00000391709	COSM1180616
ZIM3	rs7252632	MODERATE	NON_SYNONYMOUS_CODING	chr19	57647236	T	C	p.Asn157Asp	1	1459		1	p.N157D	chr19:57647236	ENST00000269834	COSM1396954
ZNF543	rs8100491	MODERATE	NON_SYNONYMOUS_CODING	chr19	57839150	A	G	p.Gln107Arg	1	740		1	p.Q107R	chr19:57839150	ENST00000321545	COSM1180667
ZNF134	rs34034473	MODERATE	NON_SYNONYMOUS_CODING	chr19	58132106	A	C	p.Ser207Arg	1	521		1	p.S207R	chr19:58132106	ENST00000396161	COSM1397141
ZNF211	rs9749449	HIGH	START_LOST	chr19	58144715	A	G	p.Met1Val	1	196		1	p.M1V	chr19:58144715	ENST00000240731	COSM1397144
VMAC	rs10404195	MODERATE	NON_SYNONYMOUS_CODING	chr19	5908969	G	A	p.Arg109His	1	483		1	p.R109H	chr19:5908969	ENST00000339485	COSM440565
MBD3L3	rs3745555	MODERATE	NON_SYNONYMOUS_CODING	chr19	7056590	C	T	p.Gly124Ser	0.509709	502		1	p.G124S	chr19:7056590	ENST00000333843	COSM1318232
STXBP2	rs6791	MODERATE	NON_SYNONYMOUS_CODING	chr19	7712277	A	G	p.Ile61Val	0.977778	544		1	p.I526V	chr19:7712277	ENST00000602355	COSM440643
TRAPPC5	rs6952	MODERATE	NON_SYNONYMOUS_CODING	chr19	7747293	T	G	p.Ser52Ala	1	208		1	p.S52A	chr19:7747293	ENST00000596148	COSM440646
ZNF559-ZNF177	rs2217652	MODERATE	NON_SYNONYMOUS_CODING	chr19	9490814	C	T	p.Thr112Met	1	287		1	p.T112M	chr19:9490814	ENST00000541595	COSM148501
TAF1B	rs396190	MODERATE	NON_SYNONYMOUS_CODING	chr2	10045024	G	A	p.Val282Ile	1	1237		1	p.V282fs*1	chr2:10045024	ENST00000263663	COSM111490
RRM2	rs1130609	MODERATE	NON_SYNONYMOUS_CODING	chr2	10262920	T	G	p.Ser59Ala	1	670	2B	1	p.S59A	chr2:10262920	ENST00000360566	COSM440905
RGPD4	rs200501106	MODERATE	NON_SYNONYMOUS_CODING	chr2	108479432	G	A	p.Ala805Thr	0.615385	208		1	p.A805T	chr2:108479432	ENST00000408999	COSM249074
CCDC138	rs6740879	MODERATE	NON_SYNONYMOUS_CODING	chr2	109408208	G	A	p.Arg115Lys	1	1048		1	p.R115K	chr2:109408208	ENST00000412964	COSM148924
GREB1	rs13394619	HIGH	SPLICE_SITE_ACCEPTOR	chr2	11727507	G	A		0.977778	549		1	p.?	chr2:11727507	ENST00000263834	COSM148800
C2orf76	rs1052500	MODERATE	NON_SYNONYMOUS_CODING	chr2	120060082	T	C	p.Lys116Arg	1	912		1	p.K116T	chr2:120060082	ENST00000409877	COSM1399052
TPO	rs1126799	MODERATE	NON_SYNONYMOUS_CODING	chr2	1520676	T	C	p.Val847Ala	0.649351	403		1	p.V847A	chr2:1520676	ENST00000345913	COSM148793
NEB	rs6713162	MODERATE	NON_SYNONYMOUS_CODING	chr2	152496526	A	G	p.Ser2912Pro	0.643836	405		1	p.S2912P	chr2:152496526	ENST00000427231	COSM148951
NEB	rs34577613	MODERATE	NON_SYNONYMOUS_CODING	chr2	152527608	C	T	p.Val1479Ile	0.674699	498		1	p.V1479I	chr2:152527608	ENST00000427231	COSM148955
WDSUB1	rs7591849	MODERATE	NON_SYNONYMOUS_CODING	chr2	160112881	G	T	p.Arg320Ser	0.6875	497		1	p.R320S	chr2:160112881	ENST00000409990	COSM148963
COBLL1	rs17244632	MODERATE	NON_SYNONYMOUS_CODING	chr2	165551404	G	A	p.Thr938Ile	0.644444	267		1	p.T871I	chr2:165551404	ENST00000194871	COSM148972
XIRP2	rs3749006	MODERATE	NON_SYNONYMOUS_CODING	chr2	168115710	T	G	p.Val918Gly	0.37931	107		1	p.V918G	chr2:168115710	ENST00000420519	COSM148980
G6PC2	rs492594	MODERATE	NON_SYNONYMOUS_CODING	chr2	169764176	G	C	p.Val219Leu	0.965517	978		1	p.V219L	chr2:169764176	ENST00000375363	COSM148982	Transmembrane_region
G6PC2	rs2232328	MODERATE	NON_SYNONYMOUS_CODING	chr2	169764546	C	G	p.Ser342Cys	0.247191	76		1	p.S342C	chr2:169764546	ENST00000375363	COSM148983	Cytoplasmic
LRP2	rs4667591	MODERATE	NON_SYNONYMOUS_CODING	chr2	170003432	T	G	p.Ile4210Leu	0.987179	964		1	p.I4210L	chr2:170003432	ENST00000263816	COSM1401028
PPIG	rs1050354	MODERATE	NON_SYNONYMOUS_CODING	chr2	170493103	T	A	p.Asp445Glu	0.566667	192		1	p.D445E	chr2:170493103	ENST00000448752	COSM148985
SP3	rs1047640	MODERATE	NON_SYNONYMOUS_CODING	chr2	174820750	T	C	p.Thr164Ala	0.608696	272		1	p.T164A	chr2:174820750	ENST00000310015	COSM148990
MSGN1	rs35858730	MODERATE	NON_SYNONYMOUS_CODING	chr2	17998095	C	T	p.His104Tyr	0.352941	133		1	p.H104Y	chr2:17998095	ENST00000281047	COSM441917
TFPI	rs7586970	MODERATE	NON_SYNONYMOUS_CODING	chr2	188343497	T	C	p.Asn221Ser	0.612903	343		1	p.N221S	chr2:188343497	ENST00000409676	COSM149030
ANKRD44		HIGH	FRAME_SHIFT	chr2	197943382	ATG	A	c.1476*>-TG	0.118644	168		1	p.H565fs*8	chr2:197943382	ENST00000539527	COSM391255
STK36	rs1863704	MODERATE	NON_SYNONYMOUS_CODING	chr2	219562675	G	A	p.Gly982Asp	0.651163	275		1	p.G1003D	chr2:219562675	ENST00000392106	COSM1565079
ATG9A	rs2276635	MODERATE	NON_SYNONYMOUS_CODING	chr2	220087441	T	C	p.Ser592Gly	0.247788	71		1	p.S592G	chr2:220087441	ENST00000409618	COSM149071
TM4SF20	rs76547437	MODERATE	NON_SYNONYMOUS_CODING	chr2	228230945	G	A	p.Leu89Phe	0.740741	235		1	p.L89F	chr2:228230945	ENST00000304568	COSM149080	Transmembrane_region
FBXO36	rs1035834	MODERATE	NON_SYNONYMOUS_CODING	chr2	230861519	G	T	p.Leu86Phe	0.631579	352		1	p.L86F	chr2:230861519	ENST00000283946	COSM149087
SP110	rs9061	MODERATE	NON_SYNONYMOUS_CODING	chr2	231077110	C	T	p.Glu213Lys	0.361842	288		1	p.E207K	chr2:231077110	ENST00000540870	COSM149088
SP110	rs11556887	MODERATE	NON_SYNONYMOUS_CODING	chr2	231077676	G	A	p.Ala82Val	0.37931	149		1	p.A128V	chr2:231077676	ENST00000455674	COSM149089
ALPP	rs13026692	MODERATE	NON_SYNONYMOUS_CODING	chr2	233243981	A	T	p.Ile89Leu	0.653846	188		1	p.I89L	chr2:233243981	ENST00000392027	COSM1162692
MROH2A	rs2361503	MODERATE	NON_SYNONYMOUS_CODING	chr2	234704318	A	G	p.Glu329Gly	0.775	311		1	p.E329G	chr2:234704318	ENST00000389758	COSM442526
HJURP	rs3732215	MODERATE	NON_SYNONYMOUS_CODING	chr2	234750542	G	C	p.Ser295Cys	0.830769	519		1	p.S295C	chr2:234750542	ENST00000411486	COSM1178465
ESPNL	rs73102303	MODERATE	NON_SYNONYMOUS_CODING	chr2	239039183	G	A	p.Val610Met	0.375	108		1	p.V610M	chr2:239039183	ENST00000343063	COSM442575
AQP12A	rs71428454	MODERATE	NON_SYNONYMOUS_CODING	chr2	241631413	T	G	p.Leu28Arg	1	744		1	p.L28R	chr2:241631413	ENST00000429564	COSM1406847
D2HGDH	rs1106639	MODERATE	NON_SYNONYMOUS_CODING	chr2	242690675	G	A	p.Val338Ile	0.686567	421		1	p.V338I	chr2:242690675	ENST00000321264	COSM1406988
FAM228B	rs2288072	MODERATE	NON_SYNONYMOUS_CODING	chr2	24390517	G	A	p.Gly318Asp	0.33	177		1	p.G317G	chr2:24390517	ENST00000407625	COSM148809
ATRAID	rs7437	MODERATE	NON_SYNONYMOUS_CODING	chr2	27439751	G	T	p.Ala264Ser	0.351351	107		1	p.G263_S268delGATTLS	chr2:27439751	ENST00000380171	COSM442734	Transmembrane_region
PLB1	rs11681826	MODERATE	NON_SYNONYMOUS_CODING	chr2	28814033	A	G	p.Met708Val	0.24	59		1	p.M708V	chr2:28814033	ENST00000327757	COSM148822
FAM179A	rs6721861	MODERATE	NON_SYNONYMOUS_CODING	chr2	29246044	T	C	p.Val535Ala	1	258		1	p.V535A	chr2:29246044	ENST00000379558	COSM442782
CYP1B1	rs1056836	MODERATE	NON_SYNONYMOUS_CODING	chr2	38298203	C	G	p.Val432Leu	0.36	109		1	p.V432L	chr2:38298203	ENST00000407341	COSM1408012
THADA	rs33979934	MODERATE	NON_SYNONYMOUS_CODING	chr2	43625184	T	A	p.Thr1385Ser	0.982143	678		1	p.T1385S	chr2:43625184	ENST00000405975	COSM148848
ABCG8	rs4148217	MODERATE	NON_SYNONYMOUS_CODING	chr2	44099433	C	A	p.Thr400Lys	0.315789	109		1	p.T400K	chr2:44099433	ENST00000272286	COSM1408149	Cytoplasmic
TSPYL6	rs843704	MODERATE	NON_SYNONYMOUS_CODING	chr2	54482964	C	T	p.Gly109Ser	0.227273	37		1	p.G109S	chr2:54482964	ENST00000317802	COSM148855
CEP68	rs7572857	MODERATE	NON_SYNONYMOUS_CODING	chr2	65296798	G	A	p.Gly74Ser	0.191489	30		1	p.G74S	chr2:65296798	ENST00000546106	COSM1130751
ETAA1	rs3770657	MODERATE	NON_SYNONYMOUS_CODING	chr2	67630980	G	A	p.Ser389Asn	1	1087		1	p.S389N	chr2:67630980	ENST00000272342	COSM148867
ETAA1	rs61740794	MODERATE	NON_SYNONYMOUS_CODING	chr2	67631831	G	A	p.Glu673Lys	1	1397		1	p.E673K	chr2:67631831	ENST00000272342	COSM148868
ETAA1	rs3770655	MODERATE	NON_SYNONYMOUS_CODING	chr2	67632125	C	T	p.Pro771Ser	1	781		1	p.P771S	chr2:67632125	ENST00000272342	COSM148869
APLF	rs35002937	MODERATE	NON_SYNONYMOUS_CODING	chr2	68753240	T	A	p.Ser224Thr	0.854167	406		1	p.S224T	chr2:68753240	ENST00000303795	COSM1409065
CD207	rs10489990	MODERATE	NON_SYNONYMOUS_CODING	chr2	71062648	G	A	p.Ala55Val	0.38806	171		1	p.A55V	chr2:71062648	ENST00000410009	COSM148875	Transmembrane_region
ZNF638	rs1804020	MODERATE	NON_SYNONYMOUS_CODING	chr2	71654175	G	A	p.Val666Met	0.774194	281		1	p.V1726M	chr2:71654175	ENST00000409407	COSM1180618
GCFC2	rs7560262	MODERATE	NON_SYNONYMOUS_CODING	chr2	75923413	T	C	p.Asn249Ser	0.318841	114		1	p.N249S	chr2:75923413	ENST00000321027	COSM148881
EIF2AK3	rs1805165	MODERATE	NON_SYNONYMOUS_CODING	chr2	88874891	C	A	p.Ala704Ser	1	1457		1	p.A704T	chr2:88874891	ENST00000303236	COSM1205103	Protein_kinase
ANKRD36	rs12996352	MODERATE	NON_SYNONYMOUS_CODING	chr2	97849219	T	C	p.Trp621Arg	0.980392	617		1	p.W621R	chr2:97849219	ENST00000461153	COSM148907
ANKRD36	rs59466168	MODERATE	NON_SYNONYMOUS_CODING	chr2	97860487	T	C	p.Leu825Ser	0.794118	280		1	p.L825S	chr2:97860487	ENST00000461153	COSM148908
MACROD2	rs2990505	MODERATE	NON_SYNONYMOUS_CODING	chr20	14066276	C	T	p.Thr58Ile	0.390244	143		1	p.T58I	chr20:14066276	ENST00000310348	COSM149145
NSFL1C	rs9575	MODERATE	NON_SYNONYMOUS_CODING	chr20	1426393	C	T	p.Asp292Asn	0.76	381		1	p.D290N	chr20:1426393	ENST00000476071	COSM1410435
FLRT3	rs6079391	MODERATE	NON_SYNONYMOUS_CODING	chr20	14306953	G	T	p.His400Gln	0.44	133		1	p.H400Q	chr20:14306953	ENST00000378053	COSM1410455
SIRPB1	rs2253427	MODERATE	NON_SYNONYMOUS_CODING	chr20	1552430	T	C	p.Ile229Met	1	721		1	p.I229M	chr20:1552430	ENST00000381605	COSM1130695
CRNKL1	rs2255255	MODERATE	NON_SYNONYMOUS_CODING	chr20	20032998	T	C	p.Thr158Ala	0.72	199		1	p.T158A	chr20:20032998	ENST00000377340	COSM1565881
CST9L	rs2295564	MODERATE	NON_SYNONYMOUS_CODING	chr20	23546639	T	G	p.His109Pro	0.697674	537		1	p.H109P	chr20:23546639	ENST00000376979	COSM1130674
GINS1	rs6076347	MODERATE	NON_SYNONYMOUS_CODING	chr20	25398790	G	A	p.Val97Ile	0.559322	294		1	p.V97I	chr20:25398790	ENST00000429262	COSM1410878
BPIFB3	rs6057717	MODERATE	NON_SYNONYMOUS_CODING	chr20	31656632	C	G	p.His334Gln	0.666667	181		1	p.H334Q	chr20:31656632	ENST00000375494	COSM443651
ITPA	rs1127354	MODERATE	NON_SYNONYMOUS_CODING	chr20	3193842	C	A	p.Pro32Thr	0.357798	224		1	p.P32T	chr20:3193842	ENST00000380113	COSM149130
KCNS1	rs734784	MODERATE	NON_SYNONYMOUS_CODING	chr20	43723627	T	C	p.Ile489Val	0.496454	484		1	p.I489V	chr20:43723627	ENST00000537075	COSM149178
SEMG1	rs2301366	MODERATE	NON_SYNONYMOUS_CODING	chr20	43836173	T	A	p.Ser79Thr	0.441176	222		1	p.S79T	chr20:43836173	ENST00000372781	COSM149179
SEMG2	rs2233896	MODERATE	NON_SYNONYMOUS_CODING	chr20	43850400	C	A	p.Gln43Lys	0.491228	237		1	p.Q43K	chr20:43850400	ENST00000372769	COSM1412026
SDC4	rs2228384	MODERATE	NON_SYNONYMOUS_CODING	chr20	43976991	A	G	p.Phe12Leu	0.313433	106		1	p.F12L	chr20:43976991	ENST00000372733	COSM443897
WFDC9	rs2245898	MODERATE	NON_SYNONYMOUS_CODING	chr20	44238741	T	G	p.Asn27Thr	0.646341	465		1	p.N27T	chr20:44238741	ENST00000326000	COSM149186
PRND	rs2245220	MODERATE	NON_SYNONYMOUS_CODING	chr20	4705718	C	T	p.Thr174Met	0.941176	401		1	p.T174M	chr20:4705718	ENST00000305817	COSM1412276
ZNF217	rs6063966	MODERATE	NON_SYNONYMOUS_CODING	chr20	52193088	C	T	p.Val739Ile	0.431034	328		1	p.V739I	chr20:52193088	ENST00000371471	COSM149200
CTCFL	rs6070128	MODERATE	NON_SYNONYMOUS_CODING	chr20	56099114	C	G	p.Glu50Gln	0.438356	228		1	p.E50Q	chr20:56099114	ENST00000433949	COSM1412683
C20orf196	rs237422	MODERATE	NON_SYNONYMOUS_CODING	chr20	5753579	C	T	p.Ala70Val	0.559322	279		1	p.A23V	chr20:5753579	ENST00000442185	COSM149133
ZNF831	rs259956	MODERATE	NON_SYNONYMOUS_CODING	chr20	57829301	T	C	p.Ser1513Pro	1	1399		1	p.S1513P	chr20:57829301	ENST00000371030	COSM1412769
CHGB	rs742711	MODERATE	NON_SYNONYMOUS_CODING	chr20	5904040	G	A	p.Arg417His	0.612903	298		1	p.R417H	chr20:5904040	ENST00000378961	COSM149135
GTPBP5	rs35693261	MODERATE	NON_SYNONYMOUS_CODING	chr20	60775922	C	T	p.Ala337Val	0.447917	267		1	p.A337V	chr20:60775922	ENST00000370823	COSM1412897
LAMA5	rs944895	MODERATE	NON_SYNONYMOUS_CODING	chr20	60887581	G	A	p.Arg3079Trp	0.555556	221		1	p.R3079W	chr20:60887581	ENST00000252999	COSM444167
RBBP8NL	rs2236200	MODERATE	NON_SYNONYMOUS_CODING	chr20	60986019	A	C	p.Leu637Arg	0.384615	147		1	p.L637R	chr20:60986019	ENST00000252998	COSM149204
COL9A3	rs61734651	MODERATE	NON_SYNONYMOUS_CODING	chr20	61451332	C	T	p.Arg66Trp	0.295455	131		1	p.R103G	chr20:61451332	ENST00000452372	COSM1559579
COL9A3	rs751557	MODERATE	NON_SYNONYMOUS_CODING	chr20	61463522	C	A	p.Ala435Glu	0.375	217		1	p.A435E	chr20:61463522	ENST00000343916	COSM1413000
DIDO1	rs1883847	MODERATE	NON_SYNONYMOUS_CODING	chr20	61528271	C	T	p.Ala556Thr	0.389831	154		1	p.A556T	chr20:61528271	ENST00000395343	COSM149207
DIDO1	rs1883848	MODERATE	NON_SYNONYMOUS_CODING	chr20	61528306	A	G	p.Met544Thr	0.323529	80		1	p.M544T	chr20:61528306	ENST00000395343	COSM444190
NKAIN4	rs872808	MODERATE	NON_SYNONYMOUS_CODING	chr20	61878950	A	C	p.Cys89Gly	0.461538	172		1	p.C151G	chr20:61878950	ENST00000370313	COSM444200
NKAIN4	rs1129659	MODERATE	NON_SYNONYMOUS_CODING	chr20	61880169	T	G	p.Lys91Gln	0.467391	297		1	p.K91Q	chr20:61880169	ENST00000370316	COSM444202
HELZ2	rs310632	MODERATE	NON_SYNONYMOUS_CODING	chr20	62196807	T	C	p.His554Arg	1	586		1	p.H1123R	chr20:62196807	ENST00000427522	COSM444227
HELZ2	rs438363	MODERATE	NON_SYNONYMOUS_CODING	chr20	62198348	C	T	p.Ser788Asn	1	705		1	p.S788N	chr20:62198348	ENST00000467148	COSM444229
SLC2A4RG	rs8957	MODERATE	NON_SYNONYMOUS_CODING	chr20	62373707	G	T	p.Glu233Asp	1	349		1	p.E233D	chr20:62373707	ENST00000266077	COSM444237
ADAMTS1	rs428785	MODERATE	NON_SYNONYMOUS_CODING	chr21	28216595	C	G	p.Ala227Pro	1	193		1	p.A227P	chr21:28216595	ENST00000284984	COSM444321
URB1	rs3761342	MODERATE	NON_SYNONYMOUS_CODING	chr21	33694224	C	G	p.Val1791Leu	1	221		1	p.V1791L	chr21:33694224	ENST00000382751	COSM149220
SON		HIGH	FRAME_SHIFT	chr21	34948684	G	GA	p.X2412X	1	2866		1	p.A2413fs*13	chr21:34948684	ENST00000356577	COSM1413901	DRBM
IGSF5	rs2837225	MODERATE	NON_SYNONYMOUS_CODING	chr21	41165462	C	A	p.Asp350Glu	1	196		1	p.D350E	chr21:41165462	ENST00000380588	COSM149226	Cytoplasmic
C21orf33	rs968714	MODERATE	NON_SYNONYMOUS_CODING	chr21	45553596	T	C	p.Val6Ala	1	396		1	p.V6A	chr21:45553596	ENST00000427803	COSM444566
CCT8L2	rs2236639	MODERATE	NON_SYNONYMOUS_CODING	chr22	17072483	A	G	p.Trp320Arg	0.245902	48		1	p.W320R	chr22:17072483	ENST00000359963	COSM149246
ARVCF	rs165815	MODERATE	NON_SYNONYMOUS_CODING	chr22	19959473	C	T	p.Arg906Gln	0.6875	151		1	p.R906Q	chr22:19959473	ENST00000263207	COSM444706
DGCR6L	rs7235	MODERATE	NON_SYNONYMOUS_CODING	chr22	20307256	G	A	p.Pro55Leu	1	513		1	p.T59T	chr22:20307256	ENST00000405465	COSM149253
THAP7	rs426938	MODERATE	NON_SYNONYMOUS_CODING	chr22	21354970	C	G	p.Ala115Pro	1	370		1	p.A115P	chr22:21354970	ENST00000399133	COSM149260
GGTLC2	rs2904923	MODERATE	NON_SYNONYMOUS_CODING	chr22	22989256	A	G	p.Glu70Gly	1	338		1	p.E70G	chr22:22989256	ENST00000480559	COSM1130493
SUSD2	rs62231981	MODERATE	NON_SYNONYMOUS_CODING	chr22	24579049	G	A	p.Arg34His	0.392857	73		1	p.R34H	chr22:24579049	ENST00000358321	COSM1178084	Alternate
RFPL1	rs3804076	MODERATE	NON_SYNONYMOUS_CODING	chr22	29837537	T	C	p.Met127Thr	0.5	31		1	p.M127T	chr22:29837537	ENST00000354373	COSM1415507
SFI1	rs5753700	MODERATE	NON_SYNONYMOUS_CODING	chr22	31971258	T	C	p.Tyr322His	1	544		1	p.Y322fs*70	chr22:31971258	ENST00000432498	COSM444897
APOL4	rs132700	MODERATE	NON_SYNONYMOUS_CODING	chr22	36587704	T	C	p.Met158Val	1	583		1	p.M158V	chr22:36587704	ENST00000352371	COSM149286
TRIOBP		MODERATE	CODON_DELETION	chr22	38119754	TCAA	T	p.Gln398X	0.984252	3070		1	p.Q398R	chr22:38119754	ENST00000406386	COSM316176
TRIOBP		MODERATE	CODON_DELETION	chr22	38120175	GCCT	G	p.X538Ala	0.433962	3070		1	p.S540delS	chr22:38120175	ENST00000406386	COSM111672
GCAT	rs710187	MODERATE	NON_SYNONYMOUS_CODING	chr22	38204089	C	T	p.Arg39Cys	0.818182	210		1	p.R39C	chr22:38204089	ENST00000445195	COSM444973
APOBEC3H		MODERATE	CODON_DELETION	chr22	39496322	TAAC	T	p.Asn14X	0.704545	1523		1	p.N15delN	chr22:39496322	ENST00000442487	COSM1416316
FAM83F	rs5995794	MODERATE	NON_SYNONYMOUS_CODING	chr22	40417820	A	G	p.Arg436Gly	0.581818	266		1	p.R436G	chr22:40417820	ENST00000333407	COSM445024
TSPO	rs6971	MODERATE	NON_SYNONYMOUS_CODING	chr22	43558926	A	G	p.His53Arg	1	449		1	p.T147A	chr22:43558926	ENST00000396265	COSM445087
PNPLA3	rs738409	MODERATE	NON_SYNONYMOUS_CODING	chr22	44324727	C	G	p.Ile148Met	0.705882	314		1	p.I148M	chr22:44324727	ENST00000216180	COSM149307	Patatin
SAMM50	rs3761472	MODERATE	NON_SYNONYMOUS_CODING	chr22	44368122	A	G	p.Asp110Gly	0.529412	131		1	p.D110G	chr22:44368122	ENST00000350028	COSM149309
PARVB	rs1007863	MODERATE	NON_SYNONYMOUS_CODING	chr22	44395451	T	C	p.Trp37Arg	0.55	205		1	p.W37R	chr22:44395451	ENST00000406477	COSM149312
CELSR1	rs9615351	MODERATE	NON_SYNONYMOUS_CODING	chr22	46760481	C	G	p.Glu2903Gln	0.319149	95		1	p.E2903Q	chr22:46760481	ENST00000262738	COSM445134	Cytoplasmic
PIM3	rs4077129	MODERATE	NON_SYNONYMOUS_CODING	chr22	50356693	T	C	p.Val300Ala	0.5	114	2B	1	p.V300A	chr22:50356693	ENST00000360612	COSM445150
PLXNB2	rs11547731	MODERATE	NON_SYNONYMOUS_CODING	chr22	50722134	T	C	p.Ile823Val	0.673469	318		1	p.I866V	chr22:50722134	ENST00000449103	COSM445170
PLXNB2	rs79966207	MODERATE	NON_SYNONYMOUS_CODING	chr22	50722408	T	C	p.Asn759Asp	0.272727	59		1	p.N802D	chr22:50722408	ENST00000449103	COSM304162
KLHDC7B	rs131779	MODERATE	NON_SYNONYMOUS_CODING	chr22	50988193	A	G	p.His533Arg	0.538462	110		1	p.H434R	chr22:50988193	ENST00000395676	COSM445185
MYH15	rs4299484	MODERATE	NON_SYNONYMOUS_CODING	chr3	108189627	C	T	p.Arg454Gln	0.533333	380		1	p.R454Q	chr3:108189627	ENST00000273353	COSM1130381
CD200R1L		HIGH	FRAME_SHIFT	chr3	112545910	GT	G	c.544*>-T	0.604167	1413		1	p.H203P	chr3:112545910	ENST00000448932	COSM309959
WDR52	rs4682484	MODERATE	NON_SYNONYMOUS_CODING	chr3	113022870	T	C	p.His260Arg	1	1601		1	p.E806fs*31	chr3:113022870	ENST00000308346	COSM242248
B4GALT4	rs3764779	MODERATE	NON_SYNONYMOUS_CODING	chr3	118945796	G	C	p.Gln116Glu	0.468354	277		1	p.Q116E	chr3:118945796	ENST00000483209	COSM149449
MUC13	rs4679392	MODERATE	NON_SYNONYMOUS_CODING	chr3	124646594	A	G	p.Ile99Thr	0.9875	1844		1	p.I99T	chr3:124646594	ENST00000311075	COSM149459
TMEM108	rs34111099	MODERATE	NON_SYNONYMOUS_CODING	chr3	133098806	C	T	p.Pro84Leu	0.4	111		1	p.P84L	chr3:133098806	ENST00000515826	COSM1566266
MSL2		MODERATE	CODON_CHANGE_PLUS_CODON_DELETION	chr3	135913872	AAAC	A	p.X27Ala	0.282828	1201		1	p.F28L	chr3:135913872	ENST00000309993	COSM204728
ATR	rs2229032	MODERATE	NON_SYNONYMOUS_CODING	chr3	142178144	C	T	p.Arg2425Gln	0.513514	659	4A	1	p.R2425Q	chr3:142178144	ENST00000350721	COSM149485
ATR	rs2227928	MODERATE	NON_SYNONYMOUS_CODING	chr3	142281612	A	G	p.Met211Thr	0.553846	307	4A	1	p.M211T	chr3:142281612	ENST00000383101	COSM149487
PLD1	rs2290480	MODERATE	NON_SYNONYMOUS_CODING	chr3	171404478	C	A	p.Ala622Ser	0.543478	236		1	p.A622S	chr3:171404478	ENST00000351298	COSM1162698	Catalytic
FNDC3B	rs7652177	MODERATE	NON_SYNONYMOUS_CODING	chr3	171969077	C	G	p.Thr179Ser	0.48	90		1	p.T179S	chr3:171969077	ENST00000416957	COSM149516
KCNMB3	rs7645550	MODERATE	NON_SYNONYMOUS_CODING	chr3	178968634	C	T	p.Ala53Thr	0.402174	223		1	p.A53T	chr3:178968634	ENST00000314235	COSM149519	Cytoplasmic
PARL	rs3732581	MODERATE	NON_SYNONYMOUS_CODING	chr3	183558402	C	G	p.Val262Leu	0.582418	463		1	p.V262L	chr3:183558402	ENST00000317096	COSM149526	Transmembrane_region
HTR3D	rs6443930	HIGH	SPLICE_SITE_DONOR	chr3	183754294	G	C		0.414634	228		1	p.G36A	chr3:183754294	ENST00000382489	COSM149529	Extracellular
HTR3C	rs6766410	MODERATE	NON_SYNONYMOUS_CODING	chr3	183774762	C	A	p.Asn163Lys	0.597015	365		1	p.N163K	chr3:183774762	ENST00000318351	COSM149531
HTR3C	rs6807362	MODERATE	NON_SYNONYMOUS_CODING	chr3	183778010	G	C	p.Gly405Ala	0.723077	408		1	p.G405A	chr3:183778010	ENST00000318351	COSM149532	Cytoplasmic
EIF4G1		MODERATE	CODON_DELETION	chr3	184039766	AAGGAGAAGC	A	p.X472Glu	0.463415	885		1	p.A468E	chr3:184039766	ENST00000424196	COSM1186466
CLCN2	rs9820367	MODERATE	NON_SYNONYMOUS_CODING	chr3	184071063	G	C	p.Thr668Ser	0.59375	832		1	p.T668S	chr3:184071063	ENST00000457512	COSM149533
CLCN2		MODERATE	CODON_CHANGE_PLUS_CODON_INSERTION	chr3	184071131	C	CCGG	p.Arg645X	0.557895	3009		1	p.A643>?	chr3:184071131	ENST00000457512	COSM306819
DGKG	rs2193587	MODERATE	NON_SYNONYMOUS_CODING	chr3	185990096	C	T	p.Arg316Lys	1	1542		1	p.R316K	chr3:185990096	ENST00000544847	COSM1566524
HRG	rs9898	MODERATE	NON_SYNONYMOUS_CODING	chr3	186390627	C	T	p.Pro204Ser	0.507246	478		1	p.P204S	chr3:186390627	ENST00000232003	COSM1179693
UTS2D	rs6788319	MODERATE	NON_SYNONYMOUS_CODING	chr3	190999917	C	A	p.Ser21Ile	0.496063	461		1	p.S21I	chr3:190999917	ENST00000432514	COSM149544
CCDC50	rs293813	MODERATE	NON_SYNONYMOUS_CODING	chr3	191097966	T	C	p.Met332Thr	0.988372	1003		1	p.M332T	chr3:191097966	ENST00000392456	COSM149545
ATP13A5	rs2280268	MODERATE	NON_SYNONYMOUS_CODING	chr3	193031926	C	T	p.Gly739Ser	0.474576	234		1	p.G739S	chr3:193031926	ENST00000342358	COSM1179815
OPA1	rs7624750	MODERATE	NON_SYNONYMOUS_CODING	chr3	193334991	G	A	p.Ser158Asn	0.396907	440		1	p.S158N	chr3:193334991	ENST00000392438	COSM446194	Mitochondrial_intermembrane
MUC20	rs199620417	MODERATE	NON_SYNONYMOUS_CODING	chr3	195452783	C	T	p.Pro437Ser	0.308642	78		1	p.P437S	chr3:195452783	ENST00000447234	COSM1421832
MUC20	rs2550232	MODERATE	NON_SYNONYMOUS_CODING	chr3	195452799	C	T	p.Thr442Ile	0.539326	323		1	p.T442I	chr3:195452799	ENST00000447234	COSM149548
MUC20	rs138659995	MODERATE	NON_SYNONYMOUS_CODING	chr3	195452805	T	C	p.Leu444Pro	0.336842	138		1	p.L444P	chr3:195452805	ENST00000447234	COSM1327649
MUC20	rs2688542	MODERATE	NON_SYNONYMOUS_CODING	chr3	195452951	G	C	p.Asp493His	0.604878	893		1	p.D493H	chr3:195452951	ENST00000447234	COSM446212	Involved_in_oligomerization
MUC20	rs3828405	MODERATE	NON_SYNONYMOUS_CODING	chr3	195453288	A	C	p.Asp605Ala	0.271186	84		1	p.D605A	chr3:195453288	ENST00000447234	COSM149549
MUC4	rs201895754	MODERATE	NON_SYNONYMOUS_CODING	chr3	195507107	C	T	p.Ala3782Thr	0.588785	445		1	p.A3782_D3797del16	chr3:195507107	ENST00000475231	COSM1421891
MUC4	rs28542401	MODERATE	NON_SYNONYMOUS_CODING	chr3	195509429	A	G	p.Ser3008Pro	0.991304	1301		1	p.S3008P	chr3:195509429	ENST00000475231	COSM446236
MUC4	rs200426444	MODERATE	NON_SYNONYMOUS_CODING	chr3	195509974	A	G	p.Phe2826Ser	0.320388	101		1	p.F2826S	chr3:195509974	ENST00000475231	COSM149586
MUC4	rs430037	MODERATE	NON_SYNONYMOUS_CODING	chr3	195511142	T	C	p.Asn2437Asp	0.328358	250		1	p.N2437D	chr3:195511142	ENST00000475231	COSM1131505
MUC4		MODERATE	CODON_CHANGE_PLUS_CODON_INSERTION	chr3	195518112	T	TGTCTCCTGCGTAACA	p.Thr113X	1	2026		1	p.T113_A114insVTQET	chr3:195518112	ENST00000475231	COSM1421936
TM4SF19	rs6785339	MODERATE	NON_SYNONYMOUS_CODING	chr3	196054439	T	G	p.Gln8Pro	0.5	248		1	p.Q8P	chr3:196054439	ENST00000454715	COSM1162699
PDCD6IP	rs3203777	MODERATE	NON_SYNONYMOUS_CODING	chr3	33879770	G	A	p.Val383Ile	0.953488	520		1	p.V378I	chr3:33879770	ENST00000457054	COSM149352
ZKSCAN7	rs9835485	MODERATE	NON_SYNONYMOUS_CODING	chr3	44611896	A	G	p.Thr432Ala	0.940299	668		1	p.T432A	chr3:44611896	ENST00000426540	COSM1423245
SACM1L	rs1468542	MODERATE	NON_SYNONYMOUS_CODING	chr3	45779136	A	T	p.Tyr434Phe	1	408		1	p.Y434F	chr3:45779136	ENST00000389061	COSM149368	SAC
KIF9	rs2276853	MODERATE	NON_SYNONYMOUS_CODING	chr3	47282303	G	A	p.Arg638Trp	1	492		1	p.R638W	chr3:47282303	ENST00000452770	COSM149379
FBXW12	rs6442117	MODERATE	NON_SYNONYMOUS_CODING	chr3	48419897	C	T	p.Arg9Trp	0.946667	789		1	p.L160fs*42	chr3:48419897	ENST00000436231	COSM1328185
IQCF1	rs57859638	MODERATE	NON_SYNONYMOUS_CODING	chr3	51930850	T	C	p.Lys57Glu	1	453		1	p.K57E	chr3:51930850	ENST00000310914	COSM1180583
SPCS1	rs6617	MODERATE	NON_SYNONYMOUS_CODING	chr3	52740182	C	G	p.Pro41Ala	1	327		1	p.P41A	chr3:52740182	ENST00000233025	COSM1566682	Cytoplasmic
DNAH12	rs4060726	MODERATE	NON_SYNONYMOUS_CODING	chr3	57335876	C	T	p.Gly480Ser	1	892		1	p.G2893S	chr3:57335876	ENST00000344804	COSM1424848
DNAH12	rs6806444	MODERATE	NON_SYNONYMOUS_CODING	chr3	57475351	T	G	p.Thr467Pro	1	897		1	p.T467P	chr3:57475351	ENST00000495027	COSM1424885
ZNF717	rs75096310	MODERATE	NON_SYNONYMOUS_CODING	chr3	75786163	C	T	p.Glu871Lys	0.490566	394		1	p.E871K	chr3:75786163	ENST00000422325	COSM1173000
ZNF717	rs3009024	MODERATE	NON_SYNONYMOUS_CODING	chr3	75786381	T	C	p.Lys798Arg	0.391304	156		1	p.K798R	chr3:75786381	ENST00000422325	COSM149422
ZNF717		HIGH	FRAME_SHIFT	chr3	75786423	T	TTC	p.X734X	0.381818	1086		1	p.K784fs*111	chr3:75786423	ENST00000478296	COSM1425322
ZNF717	rs3009023	MODERATE	NON_SYNONYMOUS_CODING	chr3	75786628	G	C	p.Gln716Glu	0.271845	129		1	p.Q716E	chr3:75786628	ENST00000422325	COSM149423
ZNF717	rs76263679	MODERATE	NON_SYNONYMOUS_CODING	chr3	75787015	C	T	p.Gly587Ser	0.372881	219		1	p.G587S	chr3:75787015	ENST00000422325	COSM1173002
ZNF717		MODERATE	CODON_CHANGE_PLUS_CODON_DELETION	chr3	75787347	TCCC	T	p.X475Glu	0.288136	503		1	p.G475delG	chr3:75787347	ENST00000422325	COSM1425335
ZNF717		HIGH	FRAME_SHIFT	chr3	75787352	T	TA	p.X424X	0.293103	768		1	p.G475fs*6	chr3:75787352	ENST00000478296	COSM1425336
ZNF717	rs74861398	MODERATE	NON_SYNONYMOUS_CODING	chr3	75787464	C	T	p.Arg437Lys	0.357895	185		1	p.R437K	chr3:75787464	ENST00000422325	COSM324546
ZNF717	rs77649281	MODERATE	NON_SYNONYMOUS_CODING	chr3	75787486	C	T	p.Glu430Lys	0.37931	229		1	p.E430K	chr3:75787486	ENST00000422325	COSM324547
ZNF717	rs74873974	MODERATE	NON_SYNONYMOUS_CODING	chr3	75787770	C	T	p.Gly335Glu	0.299145	114		1	p.G335E	chr3:75787770	ENST00000422325	COSM149424
ZNF717	rs113708852	MODERATE	NON_SYNONYMOUS_CODING	chr3	75788130	C	A	p.Gly215Val	0.494737	332		1	p.G215V	chr3:75788130	ENST00000422325	COSM236269
ZNF717	rs79165653	MODERATE	NON_SYNONYMOUS_CODING	chr3	75788316	C	T	p.Gly153Glu	0.40411	339		1	p.G153E	chr3:75788316	ENST00000422325	COSM149426
ZNF717	rs77608525	MODERATE	NON_SYNONYMOUS_CODING	chr3	75788434	G	T	p.Gln64Lys	0.446154	236		1	p.Q114K	chr3:75788434	ENST00000478296	COSM149428
THUMPD3	rs1129174	MODERATE	NON_SYNONYMOUS_CODING	chr3	9426224	G	A	p.Arg459Gln	1	307		1	p.R459Q	chr3:9426224	ENST00000515662	COSM1425728
MINA	rs2172257	MODERATE	NON_SYNONYMOUS_CODING	chr3	97664725	C	T	p.Ala386Thr	0.985714	845		1	p.A385T	chr3:97664725	ENST00000394198	COSM447109
SLC2A9	rs2276961	MODERATE	NON_SYNONYMOUS_CODING	chr4	10022981	C	T	p.Gly25Arg	1	599		1	p.G25R	chr4:10022981	ENST00000264784	COSM149645	Cytoplasmic
MTTP	rs3816873	MODERATE	NON_SYNONYMOUS_CODING	chr4	100504664	T	C	p.Ile155Thr	0.728972	675		1	p.I128T	chr4:100504664	ENST00000511045	COSM1131316
MTTP	rs113337987	MODERATE	NON_SYNONYMOUS_CODING	chr4	100532602	G	A	p.Gly688Ser	0.603053	639		1	p.G661S	chr4:100532602	ENST00000511045	COSM1426073
CENPE	rs2243682	MODERATE	NON_SYNONYMOUS_CODING	chr4	104059542	G	A	p.Thr2090Met	0.4375	146		1	p.T2090M	chr4:104059542	ENST00000265148	COSM149719
CENPE	rs2615542	MODERATE	NON_SYNONYMOUS_CODING	chr4	104066461	A	G	p.Phe1535Leu	0.583333	208		1	p.F1535L	chr4:104066461	ENST00000265148	COSM149721
TET2	rs2454206	MODERATE	NON_SYNONYMOUS_CODING	chr4	106196951	A	G	p.Ile1783Val	0.627119	331		1	p.I1762fs*3	chr4:106196951	ENST00000513237	COSM211747
EGF	rs4698803	MODERATE	NON_SYNONYMOUS_CODING	chr4	110914427	A	T	p.Glu920Val	1	1149		1	p.E920V	chr4:110914427	ENST00000265171	COSM1426371
ENPEP	rs1126483	MODERATE	NON_SYNONYMOUS_CODING	chr4	111409705	T	C	p.Val218Ala	0.68	194		1	p.V218A	chr4:111409705	ENST00000265162	COSM1131302	Extracellular
PRDM5	rs140634372	MODERATE	NON_SYNONYMOUS_CODING	chr4	121719544	A	T	p.Ser356Thr	0.30303	127		1	p.S356P	chr4:121719544	ENST00000264808	COSM1131291
NUDT6	rs12648093	MODERATE	NON_SYNONYMOUS_CODING	chr4	123838758	A	G	p.Cys114Arg	1	1077		1	p.C114R	chr4:123838758	ENST00000304430	COSM1131278
HSPA4L	rs1380154	MODERATE	NON_SYNONYMOUS_CODING	chr4	128723042	T	C	p.Leu242Ser	1	513		1	p.L211S	chr4:128723042	ENST00000439123	COSM1131260
PLK4	rs3811740	MODERATE	NON_SYNONYMOUS_CODING	chr4	128807219	T	A	p.Ser232Thr	0.974359	855		1	p.S232T	chr4:128807219	ENST00000515069	COSM1426971
C4orf33	rs337277	MODERATE	NON_SYNONYMOUS_CODING	chr4	130030652	A	G	p.Met107Val	1	756		1	p.M107V	chr4:130030652	ENST00000502887	COSM1131254
SCOC	rs2271430	MODERATE	NON_SYNONYMOUS_CODING	chr4	141294814	G	C	p.Val42Leu	0.404762	124		1	p.V42L	chr4:141294814	ENST00000506597	COSM447411
TTC29	rs10013280	MODERATE	NON_SYNONYMOUS_CODING	chr4	147788709	C	T	p.Ala302Thr	0.222222	50		1	p.A276T	chr4:147788709	ENST00000513335	COSM1131233
TIGD4	rs4696354	MODERATE	NON_SYNONYMOUS_CODING	chr4	153690842	T	C	p.Ile439Val	1	429		1	p.I439V	chr4:153690842	ENST00000304337	COSM1131225
FGA	rs6050	MODERATE	NON_SYNONYMOUS_CODING	chr4	155507590	T	C	p.Thr331Ala	0.691176	415		1	p.T331A	chr4:155507590	ENST00000403106	COSM1131211
MAP9	rs1058992	MODERATE	NON_SYNONYMOUS_CODING	chr4	156274377	T	C	p.Lys499Arg	0.69697	249		1	p.K499R	chr4:156274377	ENST00000311277	COSM1131208
TMA16	rs1561736	MODERATE	NON_SYNONYMOUS_CODING	chr4	164440581	T	C	p.Ile176Thr	0.263889	74		1	p.I176T	chr4:164440581	ENST00000358572	COSM149753
ANXA10	rs6836994	MODERATE	NON_SYNONYMOUS_CODING	chr4	169083694	A	C	p.Met71Leu	1	592		1	p.M71L	chr4:169083694	ENST00000359299	COSM149755
NEK1	rs34099167	MODERATE	NON_SYNONYMOUS_CODING	chr4	170398454	T	C	p.Glu752Gly	0.448276	146		1	p.E752G	chr4:170398454	ENST00000507142	COSM149759
TLR3	rs3775291	MODERATE	NON_SYNONYMOUS_CODING	chr4	187004074	C	T	p.Leu412Phe	0.376623	192		1	p.L412F	chr4:187004074	ENST00000296795	COSM149771
KLKB1	rs3733402	MODERATE	NON_SYNONYMOUS_CODING	chr4	187158034	G	A	p.Ser143Asn	0.366906	265		1	p.S143N	chr4:187158034	ENST00000513864	COSM149774
HTT	rs362272	MODERATE	NON_SYNONYMOUS_CODING	chr4	3234980	G	A	p.Val2786Ile	1	288		1	p.V2786I	chr4:3234980	ENST00000355072	COSM447795
NSUN7	rs2437323	MODERATE	NON_SYNONYMOUS_CODING	chr4	40778162	T	G	p.Ser308Ala	1	514		1	p.S308A	chr4:40778162	ENST00000381782	COSM149667
OTOP1	rs79218997	MODERATE	NON_SYNONYMOUS_CODING	chr4	4190595	G	C	p.Pro592Ala	0.244898	51		1	p.P592A	chr4:4190595	ENST00000296358	COSM1319338	Transmembrane_region
GUF1	rs6447368	MODERATE	NON_SYNONYMOUS_CODING	chr4	44682465	T	C	p.Leu58Pro	1	287		1	p.L58P	chr4:44682465	ENST00000281543	COSM149668
KIAA1211	rs7672073	MODERATE	NON_SYNONYMOUS_CODING	chr4	57181632	G	C	p.Arg655Pro	1	658		1	p.R655fs*22	chr4:57181632	ENST00000504228	COSM292773
KIAA1211	rs3796547	MODERATE	NON_SYNONYMOUS_CODING	chr4	57181995	C	T	p.Ser776Leu	0.645161	212		1	p.S776L	chr4:57181995	ENST00000504228	COSM149674
HOPX	rs4371677	MODERATE	NON_SYNONYMOUS_CODING	chr4	57516896	G	A	p.Pro94Leu	0.966667	659		1	p.P94L	chr4:57516896	ENST00000554144	COSM149676
REST	rs3796529	MODERATE	NON_SYNONYMOUS_CODING	chr4	57797414	C	T	p.Pro797Leu	0.25	57		1	p.P797L	chr4:57797414	ENST00000309042	COSM1131100
GC	rs7041	MODERATE	NON_SYNONYMOUS_CODING	chr4	72618334	A	C	p.Asp451Glu	0.298969	126		1	p.D432E	chr4:72618334	ENST00000504199	COSM149688
C4orf26	rs2306175	MODERATE	NON_SYNONYMOUS_CODING	chr4	76489345	C	T	p.Pro30Leu	0.423077	182		1	p.P30L	chr4:76489345	ENST00000311623	COSM149694
NAAA	rs6823734	MODERATE	NON_SYNONYMOUS_CODING	chr4	76836137	A	G	p.Phe334Leu	0.290323	90		1	p.F334L	chr4:76836137	ENST00000286733	COSM1567262
THAP9	rs1031639	MODERATE	NON_SYNONYMOUS_CODING	chr4	83838217	G	A	p.Met284Ile	0.96	572		1	p.S283_K287del	chr4:83838217	ENST00000302236	COSM39154
HPSE	rs11099592	MODERATE	NON_SYNONYMOUS_CODING	chr4	84230619	T	C	p.Lys307Arg	1	1069		1	p.K307R	chr4:84230619	ENST00000512196	COSM1131015
HSD17B13		HIGH	SPLICE_SITE_DONOR	chr4	88231392	T	TA		0.212766	471		1	p.?	chr4:88231392	ENST00000302219	COSM448300
DSPP		MODERATE	CODON_INSERTION	chr4	88536457	T	TAGTAGTGAC	p.X882X	0.978022	3070		1	p.D881_S882insSSD	chr4:88536457	ENST00000399271	COSM111956
GIN1	rs34813	MODERATE	NON_SYNONYMOUS_CODING	chr5	102433409	G	A	p.Thr239Met	0.666667	355		1	p.T239M	chr5:102433409	ENST00000399004	COSM149894	Integrase_catalytic
TRIM36	rs2974617	MODERATE	NON_SYNONYMOUS_CODING	chr5	114462355	C	T	p.Asp678Asn	1	1313		1	p.D678N	chr5:114462355	ENST00000282369	COSM1178499
AQPEP	rs10078759	MODERATE	NON_SYNONYMOUS_CODING	chr5	115341638	G	C	p.Leu689Phe	1	1313		1	p.L689F	chr5:115341638	ENST00000357872	COSM1567551	Lumenal
HSD17B4	rs25640	MODERATE	NON_SYNONYMOUS_CODING	chr5	118811533	G	A	p.Arg88His	0.387755	239		1	p.R106H	chr5:118811533	ENST00000515320	COSM1432658
HSD17B4	rs11205	MODERATE	NON_SYNONYMOUS_CODING	chr5	118861713	A	G	p.Ile584Val	0.238095	65		1	p.I559V	chr5:118861713	ENST00000504811	COSM1130959
FAM170A	rs328694	MODERATE	NON_SYNONYMOUS_CODING	chr5	118969960	C	T	p.Pro173Ser	1	640		1	p.P173S	chr5:118969960	ENST00000515256	COSM1130958
LECT2	rs31517	MODERATE	NON_SYNONYMOUS_CODING	chr5	135287029	T	C	p.Ile58Val	0.733333	148		1	p.I58V	chr5:135287029	ENST00000522943	COSM1130934
DNAH5	rs4701997	MODERATE	NON_SYNONYMOUS_CODING	chr5	13894894	T	A	p.Ile766Leu	0.993056	1744		1	p.I766L	chr5:13894894	ENST00000265104	COSM149798
PCDHB7	rs2910313	MODERATE	NON_SYNONYMOUS_CODING	chr5	140553581	G	C	p.Val389Leu	1	669		1	p.V389L	chr5:140553581	ENST00000231137	COSM1434230
PCDHB7	rs1811237	MODERATE	NON_SYNONYMOUS_CODING	chr5	140554481	G	T	p.Val689Leu	0.25	69		1	p.V689L	chr5:140554481	ENST00000231137	COSM448891	Transmembrane_region
PCDHB8	rs2697541	MODERATE	NON_SYNONYMOUS_CODING	chr5	140559596	T	G	p.Leu661Val	1	535		1	p.L661V	chr5:140559596	ENST00000239444	COSM448894
PCDHB10	rs702386	MODERATE	NON_SYNONYMOUS_CODING	chr5	140573754	A	C	p.Arg543Ser	0.973684	452		1	p.R543S	chr5:140573754	ENST00000239446	COSM1434267
PCDHB12	rs2910006	MODERATE	NON_SYNONYMOUS_CODING	chr5	140590766	A	G	p.Lys763Glu	0.592593	182		1	p.K763E	chr5:140590766	ENST00000239450	COSM1180600	Cytoplasmic
SPINK5	rs3777134	MODERATE	NON_SYNONYMOUS_CODING	chr5	147498019	G	A	p.Arg711Gln	0.295238	126		1	p.R711Q	chr5:147498019	ENST00000398454	COSM149974
SH3TC2	rs17722209	MODERATE	NON_SYNONYMOUS_CODING	chr5	148406386	T	C	p.Lys855Arg	0.642857	412		1	p.K855R	chr5:148406386	ENST00000394358	COSM149981
HAVCR1		MODERATE	CODON_CHANGE_PLUS_CODON_DELETION	chr5	156479557	GTTGGAACAGTCGTCA	G	p.X158Thr	0.19697	489		1	p.T160_V161insT	chr5:156479557	ENST00000544197	COSM112127
HMMR	rs299290	MODERATE	NON_SYNONYMOUS_CODING	chr5	162902516	T	C	p.Val369Ala	0.714286	310		1	p.V368A	chr5:162902516	ENST00000393915	COSM150009
FAM196B	rs17646221	MODERATE	NON_SYNONYMOUS_CODING	chr5	169310213	A	C	p.Ser230Arg	0.686275	335		1	p.S230R	chr5:169310213	ENST00000377365	COSM1435936
F12	rs17876030	MODERATE	NON_SYNONYMOUS_CODING	chr5	176831826	C	G	p.Ala207Pro	1	617		1	p.A207P	chr5:176831826	ENST00000253496	COSM449394
COL23A1	rs890802	MODERATE	NON_SYNONYMOUS_CODING	chr5	177683377	T	C	p.Thr287Ala	0.631579	154		1	p.T287A	chr5:177683377	ENST00000390654	COSM449419
C5orf45	rs10277	MODERATE	NON_SYNONYMOUS_CODING	chr5	179264731	T	C	p.Gln97Arg	0.289855	140		1	p.Q231R	chr5:179264731	ENST00000523084	COSM1132189
GFPT2	rs2303007	MODERATE	NON_SYNONYMOUS_CODING	chr5	179740827	T	C	p.Ile471Val	0.6875	127		1	p.I471V	chr5:179740827	ENST00000253778	COSM449465
IRX4	rs2232376	MODERATE	NON_SYNONYMOUS_CODING	chr5	1880891	C	T	p.Ala119Thr	0.428571	178		1	p.A119T	chr5:1880891	ENST00000513692	COSM1436787
ADAMTS12	rs1530507	HIGH	STOP_GAINED	chr5	33751454	A	T	p.Leu230*	1	457		1	p.L230*	chr5:33751454	ENST00000515401	COSM149808
IL7R	rs1494558	MODERATE	NON_SYNONYMOUS_CODING	chr5	35861068	T	C	p.Ile66Thr	0.507692	468		1	p.I66T	chr5:35861068	ENST00000511982	COSM149813
IL7R	rs1494555	MODERATE	NON_SYNONYMOUS_CODING	chr5	35871190	G	A	p.Val138Ile	0.5	519		1	p.V138I	chr5:35871190	ENST00000506850	COSM149814
CDC20B	rs444527	MODERATE	NON_SYNONYMOUS_CODING	chr5	54410099	G	A	p.Arg503Trp	1	581		1	p.R499W	chr5:54410099	ENST00000381375	COSM149836
SLC38A9	rs4865615	MODERATE	NON_SYNONYMOUS_CODING	chr5	54960673	C	G	p.Ser58Thr	1	780		1	p.S182T	chr5:54960673	ENST00000416547	COSM1226338
C5orf64	rs436696	MODERATE	NON_SYNONYMOUS_CODING	chr5	60999768	C	T	p.Arg101Trp	0.7	356		1	p.R101W	chr5:60999768	ENST00000505642	COSM1438081
RGS7BP	rs889248	MODERATE	NON_SYNONYMOUS_CODING	chr5	63905068	A	G	p.Ile255Val	1	469		1	p.I255V	chr5:63905068	ENST00000334025	COSM149845
HEXB	rs820878	MODERATE	NON_SYNONYMOUS_CODING	chr5	73981270	T	C	p.Leu62Ser	1	488		1	p.L62S	chr5:73981270	ENST00000261416	COSM450042
IQGAP2	rs2455230	MODERATE	NON_SYNONYMOUS_CODING	chr5	75932965	G	C	p.Leu629Phe	0.763158	322		1	p.L629F	chr5:75932965	ENST00000274364	COSM149860
CMYA5	rs16877124	MODERATE	NON_SYNONYMOUS_CODING	chr5	79026360	G	A	p.Gly591Asp	0.447368	160		1	p.G591D	chr5:79026360	ENST00000446378	COSM149863
CMYA5	rs57544556	MODERATE	NON_SYNONYMOUS_CODING	chr5	79026539	A	C	p.Ser651Arg	0.416667	145		1	p.S651R	chr5:79026539	ENST00000446378	COSM149865
CMYA5	rs16877133	MODERATE	NON_SYNONYMOUS_CODING	chr5	79028513	A	G	p.Ile1309Val	0.289474	89		1	p.I1309V	chr5:79028513	ENST00000446378	COSM149867
CMYA5	rs1428223	MODERATE	NON_SYNONYMOUS_CODING	chr5	79029288	C	A	p.Ala1567Glu	0.186047	38		1	p.A1567E	chr5:79029288	ENST00000446378	COSM149868
CMYA5	rs1428225	MODERATE	NON_SYNONYMOUS_CODING	chr5	79029749	A	G	p.Ile1721Val	0.371429	101		1	p.I1721V	chr5:79029749	ENST00000446378	COSM149869
CMYA5	rs16877147	MODERATE	NON_SYNONYMOUS_CODING	chr5	79030212	C	T	p.Ala1875Val	0.478261	193		1	p.A1875V	chr5:79030212	ENST00000446378	COSM149870
RASA1	rs111840875	MODERATE	NON_SYNONYMOUS_CODING	chr5	86564564	C	T	p.Ala99Val	0.447368	157		1	p.A99_A106delAAGVAGAA	chr5:86564564	ENST00000274376	COSM265742
GPR98	rs4916685	MODERATE	NON_SYNONYMOUS_CODING	chr5	89979698	C	T	p.Pro1987Leu	0.701389	876		1	p.P1987L	chr5:89979698	ENST00000405460	COSM149880	Extracellular
GPR98	rs2366926	MODERATE	NON_SYNONYMOUS_CODING	chr5	89988504	A	G	p.Asn2345Ser	0.610169	593		1	p.N2345S	chr5:89988504	ENST00000405460	COSM149882	Extracellular
GPR98	rs2247870	MODERATE	NON_SYNONYMOUS_CODING	chr5	90151589	G	A	p.Val5876Ile	0.578947	139		1	p.V5876I	chr5:90151589	ENST00000405460	COSM149886	GPS
ZUFSP	rs4946188	MODERATE	NON_SYNONYMOUS_CODING	chr6	116973182	T	C	p.Asn379Asp	0.5	76		1	p.N379D	chr6:116973182	ENST00000368576	COSM450386
GPRC6A	rs2274911	MODERATE	NON_SYNONYMOUS_CODING	chr6	117130704	G	A	p.Pro91Ser	0.948276	618		1	p.P91S	chr6:117130704	ENST00000530250	COSM150167
ROS1	rs619203	MODERATE	NON_SYNONYMOUS_CODING	chr6	117622184	G	C	p.Ser2229Cys	0.509091	211	2A	1	p.S2229C	chr6:117622184	ENST00000368508	COSM150168	Cytoplasmic
ROS1	rs529156	MODERATE	NON_SYNONYMOUS_CODING	chr6	117622188	T	G	p.Lys2228Gln	0.507692	243	2A	1	p.K2228Q	chr6:117622188	ENST00000368508	COSM150169	Cytoplasmic
ROS1	rs529038	MODERATE	NON_SYNONYMOUS_CODING	chr6	117622233	C	T	p.Asp2213Asn	0.469697	250	2A	1	p.D2213N	chr6:117622233	ENST00000368508	COSM150170	Protein_kinase
CEP85L	rs3734382	MODERATE	NON_SYNONYMOUS_CODING	chr6	118886961	G	T	p.Pro254Thr	0.484848	167		1	p.P251T	chr6:118886961	ENST00000392500	COSM150173
CEP85L	rs3734381	MODERATE	NON_SYNONYMOUS_CODING	chr6	118887303	T	C	p.Ser35Gly	0.535714	156		1	p.S137G	chr6:118887303	ENST00000360290	COSM150174
HINT3	rs2295005	MODERATE	NON_SYNONYMOUS_CODING	chr6	126278230	G	C	p.Gly36Ala	0.395833	143		1	p.G36A	chr6:126278230	ENST00000229633	COSM450440
THEMIS	rs675531	MODERATE	NON_SYNONYMOUS_CODING	chr6	128040839	T	C	p.Ile669Val	0.457143	139		1	p.I630V	chr6:128040839	ENST00000543064	COSM150180
LAMA2	rs2229848	MODERATE	NON_SYNONYMOUS_CODING	chr6	129807629	C	T	p.Ala2587Val	1	855		1	p.A2587V	chr6:129807629	ENST00000421865	COSM1440401
SYNJ2	rs2502601	MODERATE	NON_SYNONYMOUS_CODING	chr6	158517308	A	G	p.Glu553Gly	0.583333	215		1	p.E1468G	chr6:158517308	ENST00000367112	COSM1441854
MRPL18	rs1128670	MODERATE	NON_SYNONYMOUS_CODING	chr6	160211636	G	A	p.Arg6Gln	0.333333	89		1	p.R6Q	chr6:160211636	ENST00000367034	COSM1567946
MRPL18		MODERATE	CODON_DELETION	chr6	160211645	GGTT	G	p.X9Gly	0.319149	645		1	p.L10delL	chr6:160211645	ENST00000367034	COSM1567945
AL078585.1	rs6937392	MODERATE	NON_SYNONYMOUS_CODING	chr6	163612783	C	A	p.Arg15Leu	0.583333	114		1	p.R15L	chr6:163612783	ENST00000419182	COSM1487449
TTLL2	rs909545	MODERATE	NON_SYNONYMOUS_CODING	chr6	167754661	A	G	p.Arg425Gly	1	267		1	p.R425fs*52	chr6:167754661	ENST00000239587	COSM1442231	TTL
FRMD1	rs1548349	MODERATE	NON_SYNONYMOUS_CODING	chr6	168459845	G	C	p.Gln456Glu	1	234		1	p.Q456E	chr6:168459845	ENST00000283309	COSM1567921
TBP		MODERATE	CODON_INSERTION	chr6	170871013	A	ACAG	p.X64Gln	0.904762	985		1	p.Q63_Q64insQ	chr6:170871013	ENST00000392092	COSM247745
OR2J3	rs28757581	MODERATE	NON_SYNONYMOUS_CODING	chr6	29080004	A	G	p.Thr113Ala	0.591549	362		1	p.T113A	chr6:29080004	ENST00000377169	COSM451122
OR2H2	rs1233387	MODERATE	NON_SYNONYMOUS_CODING	chr6	29555864	C	T	p.Ala48Val	0.606061	198		1	p.A48V	chr6:29555864	ENST00000383640	COSM451138	Cytoplasmic
HLA-A	rs2075684	MODERATE	NON_SYNONYMOUS_CODING	chr6	29910558	T	A	p.Phe33Tyr	0.384615	114		1	p.F33S	chr6:29910558	ENST00000396634	COSM330510
HLA-A	rs41559916	MODERATE	NON_SYNONYMOUS_CODING	chr6	29911296	G	A	p.Gly199Arg	0.276596	42		1	p.G199R	chr6:29911296	ENST00000396634	COSM451150
MUC21	rs1634730	MODERATE	NON_SYNONYMOUS_CODING	chr6	30954245	T	C	p.Val98Ala	1	1017		1	p.V98A	chr6:30954245	ENST00000376296	COSM451184
VWA7	rs115526889	MODERATE	NON_SYNONYMOUS_CODING	chr6	31737818	C	G	p.Gly387Ala	0.676471	245		1	p.G387A	chr6:31737818	ENST00000447450	COSM451220
NOTCH4	rs422951	MODERATE	NON_SYNONYMOUS_CODING	chr6	32188383	T	C	p.Thr320Ala	1	466	2B	1	p.T320A	chr6:32188383	ENST00000375023	COSM451253
C6orf10	rs9405090	MODERATE	NON_SYNONYMOUS_CODING	chr6	32298372	A	G	p.Ser170Pro	0.594595	233		1	p.S170P	chr6:32298372	ENST00000447241	COSM451262
HLA-DRA	rs8084	HIGH	SPLICE_SITE_ACCEPTOR	chr6	32411035	A	C		1	839		1	p.I134I	chr6:32411035	ENST00000374982	COSM1443621
HLA-DRA	rs7192	MODERATE	NON_SYNONYMOUS_CODING	chr6	32411646	T	G	p.Leu242Val	1	536		1	p.L242V	chr6:32411646	ENST00000395388	COSM1443623
HLA-DRB5	rs115417906	MODERATE	NON_SYNONYMOUS_CODING	chr6	32489822	C	T	p.Arg77Gln	0.238095	57		1	p.R77Q	chr6:32489822	ENST00000374975	COSM451266
TULP1		MODERATE	CODON_CHANGE_PLUS_CODON_DELETION	chr6	35478742	GCCTCCTCTTCCTCGTCCTCCTCGT	G	p.X71Ala	0.199187	1594		1	p.E130Q	chr6:35478742	ENST00000322263	COSM1269536
FGD2	rs831510	MODERATE	NON_SYNONYMOUS_CODING	chr6	36976637	G	C	p.Gln32His	0.7	74		1	p.Q32H	chr6:36976637	ENST00000274963	COSM1131882
KIF6	rs20455	MODERATE	NON_SYNONYMOUS_CODING	chr6	39325078	A	G	p.Trp719Arg	0.428571	165		1	p.W719R	chr6:39325078	ENST00000373216	COSM150088
TTBK1		MODERATE	CODON_DELETION	chr6	43250725	GGAA	G	p.Glu750X	0.4	246		1	p.E771delE	chr6:43250725	ENST00000259750	COSM1329672
PLA2G7	rs1805017	MODERATE	NON_SYNONYMOUS_CODING	chr6	46684222	C	T	p.Arg92His	0.943548	1256		1	p.R92H	chr6:46684222	ENST00000537365	COSM451580
EYS	rs17411795	MODERATE	NON_SYNONYMOUS_CODING	chr6	66005857	T	A	p.Glu641Val	0.368421	199		1	p.E641V	chr6:66005857	ENST00000503581	COSM1137554
SSR1	rs10004	MODERATE	NON_SYNONYMOUS_CODING	chr6	7310259	A	G	p.Leu28Ser	1	410		1	p.L28S	chr6:7310259	ENST00000534851	COSM323621
GABRR1	rs1186902	MODERATE	NON_SYNONYMOUS_CODING	chr6	89926962	T	C	p.His27Arg	0.69697	240		1	p.H27R	chr6:89926962	ENST00000454853	COSM150132	Extracellular
ZAN		HIGH	SPLICE_SITE_ACCEPTOR	chr7	100371476	T	TG		0.625	833		1	p.F1923fs*800	chr7:100371476	ENST00000538115	COSM128718
ZAN	rs314344	MODERATE	NON_SYNONYMOUS_CODING	chr7	100395003	G	C	p.Gly2669Ala	0.428571	149		1	p.A2670P	chr7:100395003	ENST00000546292	COSM150341
MUC3A	rs73714227	MODERATE	NON_SYNONYMOUS_CODING	chr7	100549787	C	T	p.Ser123Leu	0.422111	460		1	p.S123L	chr7:100549787	ENST00000379458	COSM304005
MUC3A		MODERATE	CODON_INSERTION	chr7	100550032	C	CCCT	p.Pro205X	0.514085	3070		1	p.S207_V208insS	chr7:100550032	ENST00000379458	COSM452011
MUC12	rs6980143	MODERATE	NON_SYNONYMOUS_CODING	chr7	100634476	C	G	p.Thr354Ser	0.633333	351		1	p.T211S	chr7:100634476	ENST00000379442	COSM150344
MUC12	rs1791	MODERATE	NON_SYNONYMOUS_CODING	chr7	100634640	T	G	p.Ser409Ala	0.75	306		1	p.S266A	chr7:100634640	ENST00000379442	COSM150345
MUC12	rs4370452	MODERATE	NON_SYNONYMOUS_CODING	chr7	100634964	C	A	p.Pro517Thr	0.716216	467		1	p.P374T	chr7:100634964	ENST00000379442	COSM150346
MUC12	rs28463186	MODERATE	NON_SYNONYMOUS_CODING	chr7	100638856	A	G	p.His1814Arg	0.527273	220		1	p.H1671R	chr7:100638856	ENST00000379442	COSM150347
MUC12	rs11766024	MODERATE	NON_SYNONYMOUS_CODING	chr7	100647819	C	T	p.His4802Tyr	0.584416	371		1	p.H4659Y	chr7:100647819	ENST00000379442	COSM150352
MUC12	rs10953315	MODERATE	NON_SYNONYMOUS_CODING	chr7	100648029	G	A	p.Ala4872Thr	0.508197	241		1	p.A4729T	chr7:100648029	ENST00000379442	COSM150355
MUC12	rs11766125	MODERATE	NON_SYNONYMOUS_CODING	chr7	100648117	C	G	p.Thr4901Arg	0.550725	320		1	p.T4758R	chr7:100648117	ENST00000379442	COSM150356
MUC17	rs74209688	MODERATE	NON_SYNONYMOUS_CODING	chr7	100679366	A	G	p.Thr1557Ala	0.469388	202		1	p.T1557A	chr7:100679366	ENST00000306151	COSM150357
COL26A1	rs17393069	MODERATE	NON_SYNONYMOUS_CODING	chr7	101200727	G	A	p.Ala414Thr	1	560		1	p.A414A	chr7:101200727	ENST00000313669	COSM1446841
PRKRIP1	rs1047998	MODERATE	NON_SYNONYMOUS_CODING	chr7	102065651	C	T	p.Arg157Cys	0.53012	319		1	p.R157C	chr7:102065651	ENST00000354783	COSM150360
COG5	rs2269970	MODERATE	NON_SYNONYMOUS_CODING	chr7	107002806	A	G	p.Phe330Leu	1	1769		1	p.F330L	chr7:107002806	ENST00000393603	COSM150370
TMEM106B	rs3173615	MODERATE	NON_SYNONYMOUS_CODING	chr7	12269417	C	G	p.Thr185Ser	0.571429	213		1	p.T185S	chr7:12269417	ENST00000396668	COSM1178511	Lumenal
VWDE	rs7793993	MODERATE	NON_SYNONYMOUS_CODING	chr7	12417407	C	T	p.Gly340Asp	0.447368	154		1	p.G340D	chr7:12417407	ENST00000275358	COSM1137631
VWDE	rs6967241	MODERATE	NON_SYNONYMOUS_CODING	chr7	12419108	A	T	p.Phe292Ile	0.578947	218		1	p.F292I	chr7:12419108	ENST00000275358	COSM1137632
WDR91	rs292592	MODERATE	NON_SYNONYMOUS_CODING	chr7	134889141	G	A	p.Pro257Leu	0.575758	190		1	p.P257L	chr7:134889141	ENST00000354475	COSM324308
ZC3HAV1	rs2297236	MODERATE	NON_SYNONYMOUS_CODING	chr7	138740037	G	C	p.Gln823Glu	1	638		1	p.Q701E	chr7:138740037	ENST00000464606	COSM1131699
JHDM1D	rs6950119	MODERATE	NON_SYNONYMOUS_CODING	chr7	139797431	G	T	p.Arg644Ser	0.428571	127		1	p.R644S	chr7:139797431	ENST00000397560	COSM321080
SLC37A3	rs62490396	MODERATE	NON_SYNONYMOUS_CODING	chr7	140080087	C	G	p.Val65Leu	0.509804	234		1	p.V65L	chr7:140080087	ENST00000447932	COSM150404
PRSS37	rs12669721	MODERATE	NON_SYNONYMOUS_CODING	chr7	141537735	T	G	p.Thr119Pro	0.4	169		1	p.T119P	chr7:141537735	ENST00000438520	COSM1179611
TAS2R38	rs1726866	MODERATE	NON_SYNONYMOUS_CODING	chr7	141672705	G	A	p.Ala262Val	0.554217	372		1	p.A262V	chr7:141672705	ENST00000547270	COSM150406	Transmembrane_region
PRSS1	rs201550522	MODERATE	NON_SYNONYMOUS_CODING	chr7	142460335	A	G	p.Lys184Glu	0.418994	409		1	p.K170E	chr7:142460335	ENST00000486171	COSM42958
CTAGE4	rs201010806	MODERATE	NON_SYNONYMOUS_CODING	chr7	143882673	C	T	p.Leu693Phe	0.545455	189		1	p.L693F	chr7:143882673	ENST00000486333	COSM1488323
GIMAP7	rs3735080	MODERATE	NON_SYNONYMOUS_CODING	chr7	150217309	C	T	p.Arg83Cys	1	533		1	p.R83C	chr7:150217309	ENST00000313543	COSM150418
GIMAP6	rs13234724	MODERATE	NON_SYNONYMOUS_CODING	chr7	150325175	C	T	p.Gly171Ser	1	657		1	p.G171S	chr7:150325175	ENST00000328902	COSM320579
TMEM176A	rs741064	MODERATE	NON_SYNONYMOUS_CODING	chr7	150500729	A	G	p.Thr63Ala	1	440		1	p.T122A	chr7:150500729	ENST00000468689	COSM1163465
ABP1	rs1049793	MODERATE	NON_SYNONYMOUS_CODING	chr7	150557665	C	G	p.His664Asp	0.391304	145		1	p.H645D	chr7:150557665	ENST00000416793	COSM150423
MACC1	rs3735615	MODERATE	NON_SYNONYMOUS_CODING	chr7	20180717	C	G	p.Arg804Thr	1	757		1	p.R804T	chr7:20180717	ENST00000589011	COSM1180584
DFNA5	rs12540919	MODERATE	NON_SYNONYMOUS_CODING	chr7	24756951	C	T	p.Val43Met	0.409091	309		1	p.V207M	chr7:24756951	ENST00000545231	COSM1131612
HOXA1	rs10951154	MODERATE	NON_SYNONYMOUS_CODING	chr7	27135314	C	T	p.Arg73His	1	334		1	p.R73delR	chr7:27135314	ENST00000355633	COSM1488496
GARS	rs1049402	MODERATE	NON_SYNONYMOUS_CODING	chr7	30634661	C	G	p.Pro42Ala	0.611111	209		1	p.P42fs*20	chr7:30634661	ENST00000389266	COSM297232
INMT	rs2302340	MODERATE	NON_SYNONYMOUS_CODING	chr7	30795331	A	G	p.Glu219Gly	0.969697	766		1	p.E219G	chr7:30795331	ENST00000013222	COSM150255
PKD1L1	rs76100363	MODERATE	NON_SYNONYMOUS_CODING	chr7	47879049	G	A	p.Arg1922Trp	0.647059	114		1	p.R1922W	chr7:47879049	ENST00000289672	COSM453145	Cytoplasmic
C7orf72	rs998928	MODERATE	NON_SYNONYMOUS_CODING	chr7	50173777	A	G	p.Thr268Ala	0.446429	210		1	p.T268A	chr7:50173777	ENST00000297001	COSM1137701
COBL	rs375317019	MODERATE	NON_SYNONYMOUS_CODING	chr7	51094361	G	A	p.Thr1211Met	0.5625	118		1	p.T1129M	chr7:51094361	ENST00000395542	COSM485446
COBL		MODERATE	CODON_CHANGE_PLUS_CODON_DELETION	chr7	51098567	GTCT	G	p.X563Asp	0.431579	1923		1	p.E481D	chr7:51098567	ENST00000395542	COSM1451387
ZNF479	rs11981414	MODERATE	NON_SYNONYMOUS_CODING	chr7	57188016	A	G	p.Met369Thr	0.384615	161		1	p.M369T	chr7:57188016	ENST00000331162	COSM150297
ZNF679	rs12154540	MODERATE	NON_SYNONYMOUS_CODING	chr7	63721251	A	G	p.Glu69Gly	0.576923	276		1	p.E69G	chr7:63721251	ENST00000421025	COSM1137726
MLXIPL	rs3812316	MODERATE	NON_SYNONYMOUS_CODING	chr7	73020337	C	G	p.Gln241His	0.40367	261		1	p.Q241H	chr7:73020337	ENST00000429400	COSM453352
ELN	rs2071307	MODERATE	NON_SYNONYMOUS_CODING	chr7	73470714	G	A	p.Gly427Ser	0.455556	274		1	p.G422S	chr7:73470714	ENST00000429192	COSM150313
COL28A1	rs6952195	MODERATE	NON_SYNONYMOUS_CODING	chr7	7514235	C	G	p.Glu433Asp	0.976744	523		1	p.E433D	chr7:7514235	ENST00000399429	COSM150235
SRCRB4D	rs4728712	MODERATE	NON_SYNONYMOUS_CODING	chr7	76029695	C	T	p.Arg128His	0.357143	66		1	p.R128H	chr7:76029695	ENST00000275560	COSM1452110
PION	rs1527263	MODERATE	NON_SYNONYMOUS_CODING	chr7	76991935	C	T	p.Gly305Glu	0.569444	360		1	p.G305E	chr7:76991935	ENST00000257626	COSM1452150
PTPN12	rs9640663	MODERATE	NON_SYNONYMOUS_CODING	chr7	77247821	G	A	p.Val322Ile	1	441		1	p.V322I	chr7:77247821	ENST00000248594	COSM1568868
SEMA3D	rs7800072	MODERATE	NON_SYNONYMOUS_CODING	chr7	84628989	T	G	p.Lys701Gln	0.546392	403		1	p.K701Q	chr7:84628989	ENST00000284136	COSM1568841
PON1	rs662	MODERATE	NON_SYNONYMOUS_CODING	chr7	94937446	T	C	p.Gln192Arg	0.418301	395		1	p.Q192R	chr7:94937446	ENST00000542556	COSM150330
ZNF3		HIGH	FRAME_SHIFT	chr7	99662511	GTAGT	G	c.291*>-TAGT	0.490566	1236		1	p.T98I	chr7:99662511	ENST00000413658	COSM1453342
MCM7	rs2070215	MODERATE	NON_SYNONYMOUS_CODING	chr7	99696797	T	C	p.Asn144Ser	0.46875	156		1	p.N144S	chr7:99696797	ENST00000343023	COSM150336
PVRIG	rs2906645	MODERATE	NON_SYNONYMOUS_CODING	chr7	99817859	A	G	p.Asn81Asp	0.339623	102		1	p.N81D	chr7:99817859	ENST00000317271	COSM1132895
DCAF13	rs3134295	MODERATE	NON_SYNONYMOUS_CODING	chr8	104427359	A	C	p.Arg47Ser	0.27027	67		1	p.R47S	chr8:104427359	ENST00000297579	COSM453777
LRP12	rs147788045	MODERATE	NON_SYNONYMOUS_CODING	chr8	105503433	G	A	p.Thr683Met	0.342466	155		1	p.T683M	chr8:105503433	ENST00000276654	COSM453802	Cytoplasmic
ZFPM2	rs187043152	MODERATE	NON_SYNONYMOUS_CODING	chr8	106813942	G	A	p.Met544Ile	0.643836	1028		1	p.M544I	chr8:106813942	ENST00000407775	COSM453815
USP17L2	rs75807755	MODERATE	NON_SYNONYMOUS_CODING	chr8	11995062	G	A	p.Ala403Val	0.419355	160		1	p.A403V	chr8:11995062	ENST00000333796	COSM150453
TAF2	rs9297605	MODERATE	NON_SYNONYMOUS_CODING	chr8	120803637	C	G	p.Ser447Thr	1	2175		1	p.S447T	chr8:120803637	ENST00000378164	COSM150523
DSCC1	rs1055130	MODERATE	NON_SYNONYMOUS_CODING	chr8	120847188	T	C	p.His376Arg	1	2220		1	p.H376R	chr8:120847188	ENST00000313655	COSM150524
COL14A1	rs4870723	MODERATE	NON_SYNONYMOUS_CODING	chr8	121228679	A	C	p.Asn563His	0.592593	413		1	p.N563H	chr8:121228679	ENST00000309791	COSM1569216
FAM86B2	rs200871887	MODERATE	NON_SYNONYMOUS_CODING	chr8	12285202	T	G	p.Asn58His	0.428571	99		1	p.N286H	chr8:12285202	ENST00000393715	COSM1137820
GSDMC	rs4144738	MODERATE	NON_SYNONYMOUS_CODING	chr8	130760850	A	G	p.Met475Thr	0.65625	384		1	p.M475T	chr8:130760850	ENST00000276708	COSM150539
HHLA1	rs2403730	MODERATE	NON_SYNONYMOUS_CODING	chr8	133092138	G	A	p.Pro287Leu	1	205		1	p.P251L	chr8:133092138	ENST00000434736	COSM150545
TG	rs2069556	MODERATE	NON_SYNONYMOUS_CODING	chr8	133920518	A	G	p.Asp1312Gly	0.986667	898		1	p.D1312G	chr8:133920518	ENST00000377869	COSM1454960
SGCZ		MODERATE	NON_SYNONYMOUS_CODING	chr8	13965739	C	T	p.Glu185Lys	0.352941	85		1	p.E185K	chr8:13965739	ENST00000382080	COSM323284	Extracellular
LYPD2	rs11778314	MODERATE	NON_SYNONYMOUS_CODING	chr8	143833856	C	T	p.Arg5Gln	1	237		1	p.R5Q	chr8:143833856	ENST00000359228	COSM1455272
ZC3H3	rs1318196	MODERATE	NON_SYNONYMOUS_CODING	chr8	144620342	T	C	p.Ser399Gly	1	286		1	p.S399G	chr8:144620342	ENST00000262577	COSM454139
FAM83H	rs117987215	MODERATE	NON_SYNONYMOUS_CODING	chr8	144808572	C	T	p.Arg1020Gln	0.974026	869		1	p.R1020Q	chr8:144808572	ENST00000388913	COSM454163
EPPK1	rs13255110	MODERATE	NON_SYNONYMOUS_CODING	chr8	144945792	T	C	p.Lys544Glu	1	230		1	p.K544E	chr8:144945792	ENST00000525985	COSM454171
SLC18A1	rs2270641	MODERATE	NON_SYNONYMOUS_CODING	chr8	20038466	T	G	p.Thr4Pro	0.333333	65		1	p.T4P	chr8:20038466	ENST00000522513	COSM330538
PEBP4	rs1129474	MODERATE	NON_SYNONYMOUS_CODING	chr8	22584718	T	C	p.Lys125Glu	0.967742	703		1	p.K125E	chr8:22584718	ENST00000256404	COSM150467
DOCK5	rs2271111	MODERATE	NON_SYNONYMOUS_CODING	chr8	25222165	A	G	p.Gln1023Arg	0.375	137		1	p.Q1023R	chr8:25222165	ENST00000276440	COSM150472
ZMAT4	rs17851751	MODERATE	NON_SYNONYMOUS_CODING	chr8	40438757	T	C	p.Thr201Ala	0.52	151		1	p.T201A	chr8:40438757	ENST00000297737	COSM1179839
PXDNL	rs7827446	MODERATE	NON_SYNONYMOUS_CODING	chr8	52233408	C	T	p.Arg1399Lys	0.526316	214		1	p.R1399K	chr8:52233408	ENST00000356297	COSM1457422	VWFC
RP1	rs444772	MODERATE	NON_SYNONYMOUS_CODING	chr8	55539057	G	A	p.Arg872His	0.42029	370		1	p.R872H	chr8:55539057	ENST00000220676	COSM1457540
GGH	rs11545077	MODERATE	NON_SYNONYMOUS_CODING	chr8	63951237	C	T	p.Ala31Thr	0.5	97		1	p.A31T	chr8:63951237	ENST00000260118	COSM1569586
BHLHE22		MODERATE	CODON_INSERTION	chr8	65494020	G	GGCA	p.Gly225X	0.642857	492		1	p.S234delS	chr8:65494020	ENST00000321870	COSM301764
CPA6	rs10957393	MODERATE	NON_SYNONYMOUS_CODING	chr8	68536470	A	G	p.Phe45Leu	0.403226	197		1	p.F45L	chr8:68536470	ENST00000518549	COSM1179840	Activation_peptide
PSKH2	rs6998760	MODERATE	NON_SYNONYMOUS_CODING	chr8	87076520	C	A	p.Ala176Ser	0.318584	180		1	p.A176S	chr8:87076520	ENST00000276616	COSM150503	Protein_kinase
MATN2	rs2255317	MODERATE	NON_SYNONYMOUS_CODING	chr8	99044528	C	T	p.Thr855Met	1	949		1	p.T855M	chr8:99044528	ENST00000521689	COSM150512
TDRD7	rs2045732	MODERATE	NON_SYNONYMOUS_CODING	chr9	100194406	T	C	p.Val76Ala	0.98773	1929		1	p.V150A	chr9:100194406	ENST00000422139	COSM150645
C9orf156	rs3183927	MODERATE	NON_SYNONYMOUS_CODING	chr9	100684757	A	G	p.Ser7Pro	1	358		1	p.S7P	chr9:100684757	ENST00000375119	COSM455018
MRPL50	rs8131	MODERATE	NON_SYNONYMOUS_CODING	chr9	104152846	G	A	p.Leu127Phe	0.381818	165		1	p.L127I	chr9:104152846	ENST00000374865	COSM1458954
OR13F1	rs1403811	MODERATE	NON_SYNONYMOUS_CODING	chr9	107266943	G	A	p.Val134Ile	0.764706	391		1	p.V134I	chr9:107266943	ENST00000334726	COSM1459066
NIPSNAP3B	rs3739741	MODERATE	NON_SYNONYMOUS_CODING	chr9	107533175	C	G	p.Ala159Gly	0.54386	270		1	p.A159G	chr9:107533175	ENST00000374762	COSM150659
ABCA1	rs2066714	MODERATE	NON_SYNONYMOUS_CODING	chr9	107586753	T	C	p.Ile883Met	0.525641	342		1	p.I883M	chr9:107586753	ENST00000374736	COSM1178520
COL27A1	rs2241671	MODERATE	NON_SYNONYMOUS_CODING	chr9	116931099	G	A	p.Ala422Thr	0.430233	246		1	p.A422T	chr9:116931099	ENST00000356083	COSM150683
OR1N2	rs1831370	MODERATE	NON_SYNONYMOUS_CODING	chr9	125315557	T	C	p.Trp37Arg	0.323077	129		1	p.W37R	chr9:125315557	ENST00000373688	COSM150700	Extracellular
OR1N2	rs1411272	MODERATE	NON_SYNONYMOUS_CODING	chr9	125316350	C	T	p.Thr301Met	0.409836	203		1	p.T301M	chr9:125316350	ENST00000373688	COSM150701	Transmembrane_region
CRB2	rs1105222	MODERATE	NON_SYNONYMOUS_CODING	chr9	126128253	G	C	p.Gly159Ala	1	254		1	p.G159A	chr9:126128253	ENST00000373631	COSM455327
ZNF79	rs13292096	MODERATE	NON_SYNONYMOUS_CODING	chr9	130191186	C	T	p.Thr7Ile	0.740741	238		1	p.T31I	chr9:130191186	ENST00000543471	COSM1179844
LAMC3	rs2275140	MODERATE	NON_SYNONYMOUS_CODING	chr9	133948049	A	G	p.Ser1082Gly	1	750		1	p.S1082G	chr9:133948049	ENST00000361069	COSM455482
SETX	rs543573	MODERATE	NON_SYNONYMOUS_CODING	chr9	135202829	T	C	p.Ile1386Val	0.984252	1554		1	p.I1386V	chr9:135202829	ENST00000393220	COSM150732
SETX	rs1183768	MODERATE	NON_SYNONYMOUS_CODING	chr9	135203231	C	T	p.Gly1252Arg	1	1807		1	p.G1252R	chr9:135203231	ENST00000393220	COSM150733
TSC1	rs1073123	MODERATE	NON_SYNONYMOUS_CODING	chr9	135786904	A	G	p.Met322Thr	0.299145	138	2A	1	p.?	chr9:135786904	ENST00000440111	COSM43306
RALGDS	rs2073924	MODERATE	NON_SYNONYMOUS_CODING	chr9	136037742	G	A	p.Leu20Phe	0.408451	188		1	p.L20F	chr9:136037742	ENST00000542690	COSM455536
SURF6	rs886089	MODERATE	NON_SYNONYMOUS_CODING	chr9	136199466	G	A	p.Thr175Met	0.348485	145		1	p.T175M	chr9:136199466	ENST00000372022	COSM1569382
C9orf96	rs41302673	MODERATE	NON_SYNONYMOUS_CODING	chr9	136270538	T	G	p.Leu679Arg	0.714286	141		1	p.L679R	chr9:136270538	ENST00000371957	COSM1489771
VAV2	rs602990	MODERATE	NON_SYNONYMOUS_CODING	chr9	136643994	T	C	p.Met594Val	1	360		1	p.M584V	chr9:136643994	ENST00000371850	COSM150742
GLT6D1	rs35762223	MODERATE	NON_SYNONYMOUS_CODING	chr9	138516190	T	C	p.His195Arg	0.551724	165		1	p.H195R	chr9:138516190	ENST00000371763	COSM150746
GLT6D1		HIGH	FRAME_SHIFT	chr9	138516346	CA	C	c.426*>-A	0.533333	767		1	p.W143fs*9	chr9:138516346	ENST00000371763	COSM1319641
CARD9	rs4077515	MODERATE	NON_SYNONYMOUS_CODING	chr9	139266496	C	T	p.Ser12Asn	1	920		1	p.S12N	chr9:139266496	ENST00000371734	COSM455594	CARD
LCN8	rs2282258	MODERATE	NON_SYNONYMOUS_CODING	chr9	139649612	C	A	p.Gly141Val	0.222222	36		1	p.G141V	chr9:139649612	ENST00000371688	COSM1461212
KIAA1984	rs4546744	MODERATE	NON_SYNONYMOUS_CODING	chr9	139694521	T	G	p.Leu113Arg	0.540541	196		1	p.L113R	chr9:139694521	ENST00000338005	COSM455616
PNPLA7	rs11137410	MODERATE	NON_SYNONYMOUS_CODING	chr9	140414410	C	T	p.Arg54Gln	0.30303	94		1	p.R323Q	chr9:140414410	ENST00000371446	COSM455661
FREM1	rs2779500	MODERATE	NON_SYNONYMOUS_CODING	chr9	14846036	C	G	p.Val440Leu	1	1042		1	p.V439L	chr9:14846036	ENST00000380881	COSM150580
TTC39B	rs1407977	MODERATE	NON_SYNONYMOUS_CODING	chr9	15188106	T	C	p.Ile420Val	1	238		1	p.I420V	chr9:15188106	ENST00000512701	COSM455697
CCDC171	rs4741510	MODERATE	NON_SYNONYMOUS_CODING	chr9	15591372	T	A	p.Ser121Thr	0.965812	1315		1	p.S121T	chr9:15591372	ENST00000535968	COSM150581
PRSS3		HIGH	FRAME_SHIFT	chr9	33797928	G	GCC	p.X101X	0.14433	544		1	p.R158S	chr9:33797928	ENST00000379405	COSM753599
PRUNE2		MODERATE	CODON_CHANGE_PLUS_CODON_DELETION	chr9	79318375	GGTGACAGCCTGCAAC	G	p.X2713Thr	1	1006		1	p.L2714_T2718delLQAVT	chr9:79318375	ENST00000376718	COSM1319577
ZCCHC6		MODERATE	CODON_CHANGE_PLUS_CODON_DELETION	chr9	88937851	ATTT	A	p.X937Asn	1	551		1	p.N938delN	chr9:88937851	ENST00000375963	COSM291922
SPATA31E1	rs4076795	MODERATE	NON_SYNONYMOUS_CODING	chr9	90501448	C	A	p.Asp682Glu	0.38	143		1	p.D682D	chr9:90501448	ENST00000325643	COSM1463481
ROR2	rs10820900	MODERATE	NON_SYNONYMOUS_CODING	chr9	94495608	T	C	p.Thr245Ala	0.583333	103	2C	1	p.T245A	chr9:94495608	ENST00000375708	COSM1569878
TCEAL6		HIGH	FRAME_SHIFT	chrX	101395780	T	TG	p.X175X	1	805		1	p.Q175fs*>10	chrX:101395780	ENST00000372773	COSM1464461
COL4A6	rs1042065	MODERATE	NON_SYNONYMOUS_CODING	chrX	107433688	A	G	p.Ser455Pro	1	385		1	p.S454P	chrX:107433688	ENST00000394872	COSM150805
SLC25A5	rs371749	MODERATE	NON_SYNONYMOUS_CODING	chrX	118603844	T	G	p.Leu111Arg	0.923077	540		1	p.L111R	chrX:118603844	ENST00000317881	COSM1465204
MAP7D3	rs2273221	MODERATE	NON_SYNONYMOUS_CODING	chrX	135310785	T	C	p.Gln628Arg	0.981818	647		1	p.Q925R	chrX:135310785	ENST00000316077	COSM1132401
F9	rs6048	MODERATE	NON_SYNONYMOUS_CODING	chrX	138633280	A	G	p.Thr194Ala	0.982456	703		1	p.T194A	chrX:138633280	ENST00000218099	COSM1465968
MAGEC3	rs176026	MODERATE	NON_SYNONYMOUS_CODING	chrX	140983127	G	A	p.Ala80Thr	1	260		1	p.A328T	chrX:140983127	ENST00000448920	COSM1466088
MAGEC1	rs176048	MODERATE	NON_SYNONYMOUS_CODING	chrX	140994591	C	G	p.His467Gln	1	984		1	p.H467Q	chrX:140994591	ENST00000285879	COSM1466105
MAGEA4	rs1047251	MODERATE	NON_SYNONYMOUS_CODING	chrX	151092653	G	A	p.Ala173Thr	0.3	96		1	p.A173T	chrX:151092653	ENST00000448295	COSM1466377
PLXNB3	rs2266879	MODERATE	NON_SYNONYMOUS_CODING	chrX	153035798	G	A	p.Val621Ile	1	253		1	p.V598I	chrX:153035798	ENST00000538966	COSM1466598	Extracellular
CXorf58	rs2707164	MODERATE	NON_SYNONYMOUS_CODING	chrX	23928489	C	T	p.Arg24Cys	1	506		1	p.R24C	chrX:23928489	ENST00000379211	COSM1179846
MAGEB2	rs2529541	MODERATE	NON_SYNONYMOUS_CODING	chrX	30236878	G	A	p.Glu61Lys	1	278		1	p.E61K	chrX:30236878	ENST00000378988	COSM150775
PIN4	rs7058353	MODERATE	NON_SYNONYMOUS_CODING	chrX	71401614	C	A	p.Ser18Arg	1	521		1	p.S18R	chrX:71401614	ENST00000423432	COSM1469289
ATRX	rs3088074	MODERATE	NON_SYNONYMOUS_CODING	chrX	76937963	G	C	p.Gln929Glu	0.227586	35		1	p.?	chrX:76937963	ENST00000373344	COSM255219
GPR174	rs3827440	MODERATE	NON_SYNONYMOUS_CODING	chrX	78426988	T	C	p.Ser162Pro	0.692308	282		1	p.S162P	chrX:78426988	ENST00000276077	COSM1179849
POU3F4	rs5921979	MODERATE	NON_SYNONYMOUS_CODING	chrX	82764042	G	C	p.Gly237Ala	0.958333	554		1	p.G237A	chrX:82764042	ENST00000373200	COSM1180653
FRRS1		MODERATE	NON_SYNONYMOUS_CODING	chr1	100203701	C	T	p.Glu234Lys	0.258065	83		0		chr1:100203701	ENST00000414213		DOMON
AGL	rs141043166	MODERATE	NON_SYNONYMOUS_CODING	chr1	100343254	G	A	p.Arg494His	0.476636	348		0		chr1:100343254	ENST00000370165
AGL	rs3753494	MODERATE	NON_SYNONYMOUS_CODING	chr1	100358103	C	T	p.Pro1067Ser	0.295238	141		0		chr1:100358103	ENST00000370165
TRMT13	rs472498	MODERATE	NON_SYNONYMOUS_CODING	chr1	100598866	G	A	p.Ala48Thr	1	214		0		chr1:100598866	ENST00000370143
TRMT13	rs687513	MODERATE	NON_SYNONYMOUS_CODING	chr1	100598867	C	T	p.Ala48Val	1	202		0		chr1:100598867	ENST00000370143
DBT	rs12021720	MODERATE	NON_SYNONYMOUS_CODING	chr1	100672060	T	C	p.Ser384Gly	1	853		0		chr1:100672060	ENST00000370132
RNF223	rs4333796	MODERATE	NON_SYNONYMOUS_CODING	chr1	1007432	G	A	p.Ala172Val	1	202		0		chr1:1007432	ENST00000453464
GPR88	rs2809819	MODERATE	NON_SYNONYMOUS_CODING	chr1	101005090	G	A	p.Val190Ile	1	318		0		chr1:101005090	ENST00000315033		Extracellular
COL11A1	rs1676486	MODERATE	NON_SYNONYMOUS_CODING	chr1	103354138	A	G	p.Ser1547Pro	0.611111	383		0		chr1:103354138	ENST00000358392
COL11A1	rs3753841	MODERATE	NON_SYNONYMOUS_CODING	chr1	103379918	G	A	p.Pro1335Leu	0.645161	232		0		chr1:103379918	ENST00000358392
PRMT6	rs2232016	MODERATE	NON_SYNONYMOUS_CODING	chr1	107599918	C	T	p.Ala194Val	0.285714	32		0		chr1:107599918	ENST00000370078
VAV3	rs7528153	MODERATE	NON_SYNONYMOUS_CODING	chr1	108307727	T	A	p.Thr298Ser	0.970588	424		0		chr1:108307727	ENST00000527011		DH
FNDC7	rs4423040	MODERATE	NON_SYNONYMOUS_CODING	chr1	109265029	G	T	p.Arg225Leu	0.727273	202		0		chr1:109265029	ENST00000271311
FNDC7	rs4494160	MODERATE	NON_SYNONYMOUS_CODING	chr1	109268573	T	C	p.Val354Ala	1	439		0		chr1:109268573	ENST00000271311
AKNAD1	rs1277207	MODERATE	NON_SYNONYMOUS_CODING	chr1	109395105	C	T	p.Ser61Asn	0.565217	163		0		chr1:109395105	ENST00000370001
GPSM2	rs41279678	MODERATE	NON_SYNONYMOUS_CODING	chr1	109440215	G	A	p.Arg127Gln	0.327273	122		0		chr1:109440215	ENST00000406462
GPSM2		MODERATE	CODON_DELETION	chr1	109465165	ACTT	A	p.X523Thr	1	2260		0		chr1:109465165	ENST00000406462
GPSM2	rs705268	MODERATE	NON_SYNONYMOUS_CODING	chr1	109466858	G	A	p.Val202Ile	0.977778	563		0		chr1:109466858	ENST00000441735
CLCC1	rs56223817	MODERATE	NON_SYNONYMOUS_CODING	chr1	109479959	G	A	p.Arg375Trp	0.555556	145		0		chr1:109479959	ENST00000369971
KIAA1324	rs659543	MODERATE	NON_SYNONYMOUS_CODING	chr1	109735416	A	C	p.Thr623Pro	1	473		0		chr1:109735416	ENST00000369939		Extracellular
KIAA1324	rs1052878	MODERATE	NON_SYNONYMOUS_CODING	chr1	109745618	T	C	p.Leu922Pro	1	362		0		chr1:109745618	ENST00000529753		Cytoplasmic
PSRC1	rs643457	HIGH	SPLICE_SITE_ACCEPTOR	chr1	109825360	C	T		1	372		0		chr1:109825360	ENST00000369909
MYBPHL	rs629001	MODERATE	NON_SYNONYMOUS_CODING	chr1	109838918	C	T	p.Asp269Asn	1	738		0		chr1:109838918	ENST00000357155
GSTM4	rs562996	MODERATE	NON_SYNONYMOUS_CODING	chr1	110201809	G	T	p.Ser174Ile	1	614		0		chr1:110201809	ENST00000369833
GSTM4	rs563003	MODERATE	NON_SYNONYMOUS_CODING	chr1	110201812	A	G	p.Tyr175Cys	1	520		0		chr1:110201812	ENST00000369833
GSTM3	rs7483	MODERATE	NON_SYNONYMOUS_CODING	chr1	110279701	C	T	p.Val224Ile	0.647059	143		0		chr1:110279701	ENST00000540225
EPS8L3	rs3818562	MODERATE	NON_SYNONYMOUS_CODING	chr1	110300441	G	A	p.His294Tyr	0.632653	283		0		chr1:110300441	ENST00000369805
EPS8L3	rs17598321	MODERATE	NON_SYNONYMOUS_CODING	chr1	110302450	C	T	p.Met35Ile	0.571429	61		0		chr1:110302450	ENST00000369805
CSF1	rs333971	MODERATE	NON_SYNONYMOUS_CODING	chr1	110466709	T	C	p.Phe489Ser	1	448		0		chr1:110466709	ENST00000369802		Lumenal
STRIP1		MODERATE	NON_SYNONYMOUS_CODING	chr1	110592991	G	A	p.Cys639Tyr	0.6	195		0		chr1:110592991	ENST00000369795
SLC6A17		MODERATE	NON_SYNONYMOUS_CODING	chr1	110735178	A	G	p.Asp386Gly	0.25	33		0		chr1:110735178	ENST00000450985		Extracellular
MASP2	rs12711521	MODERATE	NON_SYNONYMOUS_CODING	chr1	11090916	C	A	p.Asp371Tyr	0.942857	397		0		chr1:11090916	ENST00000400897
LRIF1	rs2232041	MODERATE	NON_SYNONYMOUS_CODING	chr1	111494194	C	T	p.Ala438Thr	0.678571	221		0		chr1:111494194	ENST00000369763
CHI3L2	rs11556868	MODERATE	NON_SYNONYMOUS_CODING	chr1	111778325	C	T	p.Ala182Val	0.5	126		0		chr1:111778325	ENST00000445067
DDX20	rs199513956	MODERATE	NON_SYNONYMOUS_CODING	chr1	112305627	C	T	p.Pro45Leu	0.6	110		0		chr1:112305627	ENST00000475700
DDX20	rs197412	MODERATE	NON_SYNONYMOUS_CODING	chr1	112308953	T	C	p.Ile636Thr	0.30303	67		0		chr1:112308953	ENST00000369702
DDX20	rs197414	MODERATE	NON_SYNONYMOUS_CODING	chr1	112309123	C	A	p.Arg693Ser	0.525	206		0		chr1:112309123	ENST00000369702
DDX20	rs85276	MODERATE	NON_SYNONYMOUS_CODING	chr1	112309331	T	C	p.Ile762Thr	0.428571	151		0		chr1:112309331	ENST00000369702
PPM1J	rs10857971	MODERATE	NON_SYNONYMOUS_CODING	chr1	113255389	C	T	p.Val30Ile	1	200		0		chr1:113255389	ENST00000359994
SLC16A1	rs1049434	MODERATE	NON_SYNONYMOUS_CODING	chr1	113456546	A	T	p.Asp490Glu	1	689		0		chr1:113456546	ENST00000538576
MAGI3	rs149597924	MODERATE	NON_SYNONYMOUS_CODING	chr1	114133195	T	C	p.Tyr285His	0.589286	315		0		chr1:114133195	ENST00000369617
PTPN22	rs2476601	MODERATE	NON_SYNONYMOUS_CODING	chr1	114377568	A	G	p.Trp620Arg	1	442		0		chr1:114377568	ENST00000420377
BCL2L15	rs1217381	MODERATE	NON_SYNONYMOUS_CODING	chr1	114424601	C	T	p.Asp90Asn	1	324		0		chr1:114424601	ENST00000393316
TRIM33	rs6537825	MODERATE	NON_SYNONYMOUS_CODING	chr1	114948281	A	G	p.Ile840Thr	1	531		0		chr1:114948281	ENST00000369543
DENND2C	rs12136548	MODERATE	NON_SYNONYMOUS_CODING	chr1	115168097	T	C	p.Asp170Gly	0.392857	186		0		chr1:115168097	ENST00000393277
DENND2C	rs7541738	MODERATE	NON_SYNONYMOUS_CODING	chr1	115168600	A	T	p.Asp2Glu	0.692308	96		0		chr1:115168600	ENST00000393277
TSHB	rs10776792	MODERATE	NON_SYNONYMOUS_CODING	chr1	115576023	A	G	p.Thr14Ala	1	559		0		chr1:115576023	ENST00000369517
SLC22A15	rs185420236	MODERATE	NON_SYNONYMOUS_CODING	chr1	116534839	G	C	p.Ser92Thr	0.444444	93		0		chr1:116534839	ENST00000369503
FBXO2	rs9614	MODERATE	NON_SYNONYMOUS_CODING	chr1	11710561	T	G	p.Lys118Thr	0.645161	355		0		chr1:11710561	ENST00000354287		FBA
IGSF3	rs76417519	MODERATE	NON_SYNONYMOUS_CODING	chr1	117142641	G	A	p.Arg671Trp	0.464286	142		0		chr1:117142641	ENST00000369483
IGSF3	rs75947003	MODERATE	NON_SYNONYMOUS_CODING	chr1	117142700	C	A	p.Ser651Ile	0.382979	115		0		chr1:117142700	ENST00000369483
IGSF3	rs61786577	MODERATE	NON_SYNONYMOUS_CODING	chr1	117146504	G	A	p.Arg476Cys	0.291667	86		0		chr1:117146504	ENST00000369483
IGSF3	rs61786578	MODERATE	NON_SYNONYMOUS_CODING	chr1	117146563	G	A	p.Thr456Met	0.361111	75		0		chr1:117146563	ENST00000369483
IGSF3	rs61786651	MODERATE	NON_SYNONYMOUS_CODING	chr1	117156459	C	T	p.Asp254Asn	0.367347	99		0		chr1:117156459	ENST00000369486
PTGFRN	rs10801922	MODERATE	NON_SYNONYMOUS_CODING	chr1	117529458	G	A	p.Val837Ile	0.55	128		0		chr1:117529458	ENST00000393203		Transmembrane_region
TTF2	rs998532	MODERATE	NON_SYNONYMOUS_CODING	chr1	117617705	A	G	p.Lys167Glu	1	567		0		chr1:117617705	ENST00000369466
TRIM45	rs3738413	MODERATE	NON_SYNONYMOUS_CODING	chr1	117659352	C	T	p.Arg413Gln	0.259259	80		0		chr1:117659352	ENST00000256649
C1orf167	rs4845880	MODERATE	NON_SYNONYMOUS_CODING	chr1	11828238	G	A	p.Arg544Gln	1	384		0		chr1:11828238	ENST00000433342
C1orf167	rs4845881	MODERATE	NON_SYNONYMOUS_CODING	chr1	11828319	G	A	p.Arg571Gln	1	486		0		chr1:11828319	ENST00000433342
C1orf167	rs6667720	MODERATE	NON_SYNONYMOUS_CODING	chr1	11831615	C	T	p.Arg602Trp	1	661		0		chr1:11831615	ENST00000433342
C1orf167	rs6697244	MODERATE	NON_SYNONYMOUS_CODING	chr1	11838848	G	T	p.Ser848Ile	0.971429	432		0		chr1:11838848	ENST00000433342
C1orf167	rs4846043	MODERATE	NON_SYNONYMOUS_CODING	chr1	11839966	G	A	p.Arg944His	1	368		0		chr1:11839966	ENST00000433342
C1orf167	rs868014	MODERATE	NON_SYNONYMOUS_CODING	chr1	11849447	A	G	p.Arg1456Gly	1	376		0		chr1:11849447	ENST00000433342
SPAG17	rs10923472	MODERATE	NON_SYNONYMOUS_CODING	chr1	118565953	G	A	p.Pro1348Leu	0.8	179		0		chr1:118565953	ENST00000336338
CLCN6	rs198400	MODERATE	NON_SYNONYMOUS_CODING	chr1	11884555	A	G	p.Glu198Gly	1	744		0		chr1:11884555	ENST00000376496
HSD3B1	rs1047303	MODERATE	NON_SYNONYMOUS_CODING	chr1	120057246	C	A	p.Thr369Asn	0.46875	142		0		chr1:120057246	ENST00000235547
PLOD1	rs7551175	MODERATE	NON_SYNONYMOUS_CODING	chr1	12009956	G	A	p.Ala99Thr	0.227642	33		0		chr1:12009956	ENST00000429000
PLOD1	rs2273285	MODERATE	NON_SYNONYMOUS_CODING	chr1	12010469	G	T	p.Ala167Ser	0.35	128		0		chr1:12010469	ENST00000376369
MIIP	rs11553925	MODERATE	NON_SYNONYMOUS_CODING	chr1	12082334	A	T	p.Lys99Asn	0.4375	104		0		chr1:12082334	ENST00000436478
MIIP	rs2295283	MODERATE	NON_SYNONYMOUS_CODING	chr1	12082926	A	G	p.Lys167Glu	1	1048		0		chr1:12082926	ENST00000436478
TNFRSF8	rs1763642	MODERATE	NON_SYNONYMOUS_CODING	chr1	12175729	C	T	p.Arg297Cys	1	1007		0		chr1:12175729	ENST00000263932
TAS1R3	rs307377	MODERATE	NON_SYNONYMOUS_CODING	chr1	1269554	T	C	p.Cys757Arg	1	738		0		chr1:1269554	ENST00000339381		Cytoplasmic
PRAMEF12	rs1812242	MODERATE	NON_SYNONYMOUS_CODING	chr1	12835868	T	C	p.Met157Thr	1	932		0		chr1:12835868	ENST00000357726
PRAMEF1	rs79492089	MODERATE	NON_SYNONYMOUS_CODING	chr1	12854068	T	C	p.Trp98Arg	0.27381	36		0		chr1:12854068	ENST00000332296
PRAMEF1	rs1769774	MODERATE	NON_SYNONYMOUS_CODING	chr1	12854428	C	T	p.Pro218Ser	0.708861	866		0		chr1:12854428	ENST00000332296
PRAMEF1	rs1063776	MODERATE	NON_SYNONYMOUS_CODING	chr1	12854530	C	G	p.Gln252Glu	1	1531		0		chr1:12854530	ENST00000332296
PRAMEF1	rs1063795	MODERATE	NON_SYNONYMOUS_CODING	chr1	12855835	C	G	p.Ala372Gly	1	348		0		chr1:12855835	ENST00000332296
PRAMEF1	rs2982215	MODERATE	NON_SYNONYMOUS_CODING	chr1	12856111	C	T	p.Pro464Leu	0.6	213		0		chr1:12856111	ENST00000332296
PRAMEF11	rs2994114	MODERATE	NON_SYNONYMOUS_CODING	chr1	12887549	T	C	p.Glu103Gly	1	1073		0		chr1:12887549	ENST00000535591
HNRNPCL1	rs112607517	MODERATE	NON_SYNONYMOUS_CODING	chr1	12907316	T	C	p.Glu276Gly	0.328829	244		0		chr1:12907316	ENST00000317869
PRAMEF2	rs17039307	MODERATE	NON_SYNONYMOUS_CODING	chr1	12921332	T	C	p.Cys375Arg	0.302632	102		0		chr1:12921332	ENST00000240189
PRAMEF6	rs1967669	MODERATE	NON_SYNONYMOUS_CODING	chr1	13001312	C	G	p.Cys124Ser	0.580189	759		0		chr1:13001312	ENST00000415464
PRAMEF22	rs61780078	MODERATE	NON_SYNONYMOUS_CODING	chr1	13036587	C	T	p.Pro220Leu	1	728		0		chr1:13036587	ENST00000376187
PRAMEF13	rs71183793	MODERATE	NON_SYNONYMOUS_CODING	chr1	13448351	T	C	p.His375Arg	1	662		0		chr1:13448351	ENST00000376132
PRAMEF19	rs201167498	MODERATE	NON_SYNONYMOUS_CODING	chr1	13695685	G	A	p.Ser427Leu	1	188		0		chr1:13695685	ENST00000540591
PRAMEF19	rs12131695	MODERATE	NON_SYNONYMOUS_CODING	chr1	13695787	C	G	p.Gly393Ala	1	395		0		chr1:13695787	ENST00000540591
PRAMEF19	rs142734546	MODERATE	NON_SYNONYMOUS_CODING	chr1	13695974	T	C	p.Thr331Ala	1	187		0		chr1:13695974	ENST00000540591
PRAMEF19	rs2359294	MODERATE	NON_SYNONYMOUS_CODING	chr1	13696022	A	G	p.Trp315Arg	1	87		0		chr1:13696022	ENST00000540591
PRAMEF19	rs200378484	MODERATE	NON_SYNONYMOUS_CODING	chr1	13696054	G	A	p.Ser304Phe	1	147		0		chr1:13696054	ENST00000540591
ATAD3C	rs9793256	MODERATE	NON_SYNONYMOUS_CODING	chr1	1387764	G	A	p.Gly58Arg	0.629032	344		0		chr1:1387764	ENST00000378785
PDPN	rs2486188	MODERATE	NON_SYNONYMOUS_CODING	chr1	13940864	C	G	p.Ala223Gly	0.981481	659		0		chr1:13940864	ENST00000376057		Transmembrane_region
PRDM2	rs1046331	MODERATE	NON_SYNONYMOUS_CODING	chr1	14143003	A	G	p.Gln34Arg	1	727		0		chr1:14143003	ENST00000505823
NBPF8P	rs4649563	HIGH	SPLICE_SITE_ACCEPTOR	chr1	144619346	G	A		1	379		0		chr1:144619346	ENST00000448172
PDE4DIP	rs61804988	HIGH	STOP_GAINED	chr1	144852390	C	T	p.Trp2351*	0.324324	162		0		chr1:144852390	ENST00000369356
PDE4DIP	rs1613780	MODERATE	NON_SYNONYMOUS_CODING	chr1	144865850	G	T	p.Asp2046Glu	0.445946	253		0		chr1:144865850	ENST00000369359
PDE4DIP	rs1620560	MODERATE	NON_SYNONYMOUS_CODING	chr1	144866643	G	A	p.Arg2003Cys	0.295455	85		0		chr1:144866643	ENST00000369359
PDE4DIP	rs1628310	MODERATE	NON_SYNONYMOUS_CODING	chr1	144868170	C	T	p.Ala1893Thr	0.513514	136		0		chr1:144868170	ENST00000369359
PDE4DIP	rs1698605	MODERATE	NON_SYNONYMOUS_CODING	chr1	144871738	C	A	p.Ala1878Ser	0.3	54		0		chr1:144871738	ENST00000369359
PDE4DIP	rs1778159	MODERATE	NON_SYNONYMOUS_CODING	chr1	144871755	A	T	p.Val1872Glu	0.4	109		0		chr1:144871755	ENST00000369359
PDE4DIP	rs1778158	MODERATE	NON_SYNONYMOUS_CODING	chr1	144871782	A	G	p.Leu1863Pro	0.42	180		0		chr1:144871782	ENST00000369359
PDE4DIP	rs1778155	MODERATE	NON_SYNONYMOUS_CODING	chr1	144874815	T	C	p.His1734Arg	0.405594	324		0		chr1:144874815	ENST00000530740
PDE4DIP	rs2762875	MODERATE	NON_SYNONYMOUS_CODING	chr1	144877176	C	T	p.Arg1640Gln	0.387255	355		0		chr1:144877176	ENST00000530740
PDE4DIP	rs2798901	MODERATE	NON_SYNONYMOUS_CODING	chr1	144879264	A	G	p.Trp1532Arg	1	1397		0		chr1:144879264	ENST00000530740
PDE4DIP	rs1747958	MODERATE	NON_SYNONYMOUS_CODING	chr1	144879375	T	C	p.Lys1495Glu	0.402516	345		0		chr1:144879375	ENST00000530740
PDE4DIP	rs1698647	MODERATE	NON_SYNONYMOUS_CODING	chr1	144882823	C	T	p.Ala1203Thr	0.467532	261		0		chr1:144882823	ENST00000530740
PDE4DIP	rs1698624	MODERATE	NON_SYNONYMOUS_CODING	chr1	144886197	A	T	p.Phe1150Ile	0.308901	204		0		chr1:144886197	ENST00000530740
PDE4DIP	rs1628172	MODERATE	NON_SYNONYMOUS_CODING	chr1	144912153	A	G	p.Cys871Arg	0.689189	456		0		chr1:144912153	ENST00000529945
PDE4DIP	rs1629011	MODERATE	NON_SYNONYMOUS_CODING	chr1	144912233	C	T	p.Arg844His	0.245902	66		0		chr1:144912233	ENST00000529945
PDE4DIP	rs1778111	HIGH	STOP_GAINED	chr1	144915561	G	A	p.Arg409*	0.419643	294		0		chr1:144915561	ENST00000479408
PDE4DIP		HIGH	FRAME_SHIFT	chr1	144915623	AG	A	c.1161*>-G	0.195122	276		0		chr1:144915623	ENST00000479408
PDE4DIP	rs1747930	MODERATE	NON_SYNONYMOUS_CODING	chr1	144916748	C	G	p.Ser699Thr	0.384615	130		0		chr1:144916748	ENST00000529945
PDE4DIP	rs1698681	MODERATE	NON_SYNONYMOUS_CODING	chr1	144917841	T	C	p.His645Arg	0.463235	381		0		chr1:144917841	ENST00000529945
PDE4DIP	rs1061308	MODERATE	NON_SYNONYMOUS_CODING	chr1	144918957	T	A	p.Glu573Val	0.306667	102		0		chr1:144918957	ENST00000529945
PDE4DIP	rs1359300	MODERATE	NON_SYNONYMOUS_CODING	chr1	144922583	G	A	p.Ser62Leu	0.441176	457		0		chr1:144922583	ENST00000479408
PDE4DIP		HIGH	FRAME_SHIFT	chr1	144923728	GT	G	c.1139*>-T	0.284211	932		0		chr1:144923728	ENST00000369359
PDE4DIP	rs2147326	MODERATE	NON_SYNONYMOUS_CODING	chr1	144930940	T	C	p.Lys257Glu	0.434307	685		0		chr1:144930940	ENST00000529945
PDE4DIP	rs2762745	MODERATE	NON_SYNONYMOUS_CODING	chr1	144931330	C	T	p.Ala127Thr	0.396078	476		0		chr1:144931330	ENST00000529945
PDE4DIP	rs2798893	MODERATE	NON_SYNONYMOUS_CODING	chr1	144931392	G	A	p.Ala106Val	0.377049	309		0		chr1:144931392	ENST00000529945
PDE4DIP	rs1664022	MODERATE	NON_SYNONYMOUS_CODING	chr1	144994658	C	A	p.Arg91Leu	0.39834	496		0		chr1:144994658	ENST00000313382
PDE4DIP	rs1778711	MODERATE	NON_SYNONYMOUS_CODING	chr1	145014103	G	C	p.Gln147Glu	0.404762	204		0		chr1:145014103	ENST00000493130
PDE4DIP		HIGH	FRAME_SHIFT	chr1	145014186	G	GA	p.X119X	0.287356	354		0		chr1:145014186	ENST00000493130
NUDT4P1		HIGH	SPLICE_SITE_ACCEPTOR	chr1	145139088	C	CG		1	3070		0		chr1:145139088	ENST00000322209
NOTCH2NL	rs8002	MODERATE	NON_SYNONYMOUS_CODING	chr1	145281543	C	T	p.Thr158Ile	0.269542	110		0		chr1:145281543	ENST00000369340
NBPF10	rs12565078	MODERATE	NON_SYNONYMOUS_CODING	chr1	145293515	A	G	p.Asn37Ser	0.358621	388		0		chr1:145293515	ENST00000369339
NBPF10	rs6663523	MODERATE	NON_SYNONYMOUS_CODING	chr1	145296478	G	T	p.Asp59Tyr	0.786667	501		0		chr1:145296478	ENST00000448873
NBPF10	rs28507779	MODERATE	NON_SYNONYMOUS_CODING	chr1	145298186	C	G	p.Pro200Ala	0.293478	31		0		chr1:145298186	ENST00000369339
NBPF10	rs9424711	MODERATE	NON_SYNONYMOUS_CODING	chr1	145299824	C	G	p.Ile291Met	0.453125	355		0		chr1:145299824	ENST00000342960
NBPF10	rs148808255	MODERATE	NON_SYNONYMOUS_CODING	chr1	145311824	T	A	p.Val358Asp	0.552632	171		0		chr1:145311824	ENST00000369338
NBPF10	rs12135693	MODERATE	NON_SYNONYMOUS_CODING	chr1	145311828	C	G	p.Phe359Leu	1	520		0		chr1:145311828	ENST00000369338
NBPF10	rs12128680	MODERATE	NON_SYNONYMOUS_CODING	chr1	145368461	A	C	p.Glu600Ala	0.445161	408		0		chr1:145368461	ENST00000369339
ITGA10	rs2274616	MODERATE	NON_SYNONYMOUS_CODING	chr1	145536082	G	A	p.Arg725Gln	0.952381	490		0		chr1:145536082	ENST00000369304
ANKRD35	rs6670984	MODERATE	NON_SYNONYMOUS_CODING	chr1	145561594	C	T	p.Pro428Ser	0.513514	183		0		chr1:145561594	ENST00000355594
ANKRD35	rs41315701	MODERATE	NON_SYNONYMOUS_CODING	chr1	145562087	G	A	p.Arg592Gln	0.677419	230		0		chr1:145562087	ENST00000355594
ANKRD35	rs11579366	MODERATE	NON_SYNONYMOUS_CODING	chr1	145562293	G	C	p.Glu661Gln	0.536585	196		0		chr1:145562293	ENST00000355594
PDZK1	rs148919265	MODERATE	NON_SYNONYMOUS_CODING	chr1	145748503	G	A	p.Gly126Ser	0.342857	103		0		chr1:145748503	ENST00000451928
CHD1L	rs17356233	MODERATE	NON_SYNONYMOUS_CODING	chr1	146740502	C	G	p.His69Gln	0.493506	307		0		chr1:146740502	ENST00000361293
CHD1L	rs2275249	MODERATE	NON_SYNONYMOUS_CODING	chr1	146759320	C	G	p.Ser743Cys	0.588235	194		0		chr1:146759320	ENST00000369258		Macro
CHD1L	rs4950394	MODERATE	NON_SYNONYMOUS_CODING	chr1	146767149	G	T	p.Ala885Ser	1	1419		0		chr1:146767149	ENST00000369258		Macro
BCL9	rs3820129	MODERATE	NON_SYNONYMOUS_CODING	chr1	147091972	C	T	p.Pro671Ser	0.522727	202		0		chr1:147091972	ENST00000234739
ACP6	rs6593795	MODERATE	NON_SYNONYMOUS_CODING	chr1	147121977	C	T	p.Val316Met	1	763		0		chr1:147121977	ENST00000369238
NBPF14	rs201061774	MODERATE	NON_SYNONYMOUS_CODING	chr1	148010911	G	A	p.Arg571Cys	0.402778	149		0		chr1:148010911	ENST00000369219
AL358813.2	rs630607	MODERATE	NON_SYNONYMOUS_CODING	chr1	149676401	A	G	p.Gln111Arg	0.49635	381		0		chr1:149676401	ENST00000369173
ANP32E		MODERATE	CODON_CHANGE_PLUS_CODON_DELETION	chr1	150199039	CTCCTCT	C	p.X70Glu	0.4375	1318		0		chr1:150199039	ENST00000534220
ECM1	rs13294	MODERATE	NON_SYNONYMOUS_CODING	chr1	150484987	G	A	p.Gly442Ser	0.597403	682		0		chr1:150484987	ENST00000369049
ADAMTSL4		MODERATE	NON_SYNONYMOUS_CODING	chr1	150525532	C	A	p.His79Gln	0.581395	232		0		chr1:150525532	ENST00000369041
ADAMTSL4	rs41317515	MODERATE	NON_SYNONYMOUS_CODING	chr1	150526044	G	C	p.Ala193Pro	0.607477	515		0		chr1:150526044	ENST00000369041
ANXA9	rs267733	MODERATE	NON_SYNONYMOUS_CODING	chr1	150958836	A	G	p.Asp166Gly	0.553846	297		0		chr1:150958836	ENST00000368947
FAM63A	rs2925741	MODERATE	NON_SYNONYMOUS_CODING	chr1	150970577	G	T	p.Thr433Lys	0.965517	369		0		chr1:150970577	ENST00000361738
FAM63A	rs771205	MODERATE	NON_SYNONYMOUS_CODING	chr1	150975108	T	C	p.Lys44Glu	1	639		0		chr1:150975108	ENST00000361738
SEMA6C	rs4971007	MODERATE	NON_SYNONYMOUS_CODING	chr1	151108137	T	G	p.Thr455Pro	0.441176	149		0		chr1:151108137	ENST00000368914		Sema
RP11-126K1.2	rs3811406	MODERATE	NON_SYNONYMOUS_CODING	chr1	151254041	T	C	p.His32Arg	0.533333	216		0		chr1:151254041	ENST00000447795
PSMB4	rs4603	MODERATE	NON_SYNONYMOUS_CODING	chr1	151374025	T	C	p.Ile234Thr	0.378378	169		0		chr1:151374025	ENST00000290541
CGN	rs140720174	MODERATE	NON_SYNONYMOUS_CODING	chr1	151491836	C	T	p.Arg281Trp	0.5	162		0		chr1:151491836	ENST00000427934
MRPL9	rs8480	MODERATE	NON_SYNONYMOUS_CODING	chr1	151733335	T	G	p.Glu210Ala	0.34	131		0		chr1:151733335	ENST00000368830
RORC	rs80223568	MODERATE	NON_SYNONYMOUS_CODING	chr1	151803449	G	T	p.His53Asn	0.457143	159		0		chr1:151803449	ENST00000392697
THEM5	rs6587624	MODERATE	NON_SYNONYMOUS_CODING	chr1	151820298	G	C	p.Leu206Val	1	1195		0		chr1:151820298	ENST00000368817
THEM5	rs6587625	MODERATE	NON_SYNONYMOUS_CODING	chr1	151820324	T	C	p.Asp197Gly	1	699		0		chr1:151820324	ENST00000368817
THEM4	rs3748805	MODERATE	NON_SYNONYMOUS_CODING	chr1	151881885	A	C	p.Leu17Arg	1	359		0		chr1:151881885	ENST00000489410
TCHH	rs11803731	MODERATE	NON_SYNONYMOUS_CODING	chr1	152083325	A	T	p.Leu790Met	0.368421	120		0		chr1:152083325	ENST00000368804
TCHH	rs2515663	MODERATE	NON_SYNONYMOUS_CODING	chr1	152085505	A	C	p.Leu63Arg	1	479		0		chr1:152085505	ENST00000368804
HRNR	rs61814936	MODERATE	NON_SYNONYMOUS_CODING	chr1	152187562	A	C	p.His2181Gln	0.991228	1076		0		chr1:152187562	ENST00000368801
HRNR	rs61814940	MODERATE	NON_SYNONYMOUS_CODING	chr1	152188109	T	A	p.Gln1999Leu	0.484848	571		0		chr1:152188109	ENST00000368801
HRNR	rs80018286	MODERATE	NON_SYNONYMOUS_CODING	chr1	152188998	C	T	p.Gly1703Ser	0.290698	47		0		chr1:152188998	ENST00000368801
HRNR	rs7514457	MODERATE	NON_SYNONYMOUS_CODING	chr1	152190720	C	T	p.Gly1129Ser	1	256		0		chr1:152190720	ENST00000368801
HRNR	rs6587647	MODERATE	NON_SYNONYMOUS_CODING	chr1	152192631	C	T	p.Gly492Arg	1	1053		0		chr1:152192631	ENST00000368801
HRNR	rs6587648	MODERATE	NON_SYNONYMOUS_CODING	chr1	152192687	T	C	p.Glu473Gly	1	910		0		chr1:152192687	ENST00000368801
HRNR	rs6666097	MODERATE	NON_SYNONYMOUS_CODING	chr1	152192825	C	T	p.Gly427Asp	1	756		0		chr1:152192825	ENST00000368801
HRNR	rs6587649	MODERATE	NON_SYNONYMOUS_CODING	chr1	152192978	T	C	p.Gln376Arg	1	398		0		chr1:152192978	ENST00000368801
HRNR	rs11204937	MODERATE	NON_SYNONYMOUS_CODING	chr1	152193851	C	T	p.Arg85His	1	873		0		chr1:152193851	ENST00000368801
FLG		MODERATE	NON_SYNONYMOUS_CODING	chr1	152283356	A	G	p.Ser1336Pro	0.432432	314		0		chr1:152283356	ENST00000368799
LCE5A	rs2105117	MODERATE	NON_SYNONYMOUS_CODING	chr1	152484129	G	A	p.Cys40Tyr	0.965517	623		0		chr1:152484129	ENST00000334269
LCE2D	rs9793541	MODERATE	NON_SYNONYMOUS_CODING	chr1	152636843	A	T	p.Ser88Cys	0.380952	75		0		chr1:152636843	ENST00000368784
KPRP	rs17612167	MODERATE	NON_SYNONYMOUS_CODING	chr1	152732106	A	T	p.Gln14His	0.647059	133		0		chr1:152732106	ENST00000368773
KPRP	rs4329520	MODERATE	NON_SYNONYMOUS_CODING	chr1	152733301	T	A	p.Cys413Ser	0.65	246		0		chr1:152733301	ENST00000368773
LCE1E	rs11205106	MODERATE	NON_SYNONYMOUS_CODING	chr1	152759950	A	G	p.Ser59Gly	0.311111	77		0		chr1:152759950	ENST00000368771
SPRR1A	rs1611762	MODERATE	NON_SYNONYMOUS_CODING	chr1	152957832	C	A	p.His42Gln	0.98	585		0		chr1:152957832	ENST00000368762
SPRR1A	rs1611764	MODERATE	NON_SYNONYMOUS_CODING	chr1	152957887	G	A	p.Val61Ile	0.95122	461		0		chr1:152957887	ENST00000368762
SPRR3	rs1055935	MODERATE	NON_SYNONYMOUS_CODING	chr1	152975941	C	G	p.Leu149Val	1	729		0		chr1:152975941	ENST00000331860
PGLYRP3	rs843971	MODERATE	NON_SYNONYMOUS_CODING	chr1	153277423	C	T	p.Gly126Ser	0.391304	109		0		chr1:153277423	ENST00000290722
PGLYRP4	rs3006448	MODERATE	NON_SYNONYMOUS_CODING	chr1	153314153	C	A	p.Gly192Val	1	349		0		chr1:153314153	ENST00000359650
PGLYRP4	rs3006453	MODERATE	NON_SYNONYMOUS_CODING	chr1	153317723	T	C	p.Gln92Arg	0.513514	304		0		chr1:153317723	ENST00000359650
PGLYRP4	rs3006458	MODERATE	NON_SYNONYMOUS_CODING	chr1	153320372	T	G	p.Ile13Leu	1	1673		0		chr1:153320372	ENST00000368739
S100A7L2	rs10888561	MODERATE	NON_SYNONYMOUS_CODING	chr1	153410822	C	A	p.Gly6Val	1	349		0		chr1:153410822	ENST00000453814
S100A7	rs3014837	MODERATE	NON_SYNONYMOUS_CODING	chr1	153431406	C	G	p.Glu28Asp	1	838		0		chr1:153431406	ENST00000368723
CRTC2	rs11264680	MODERATE	NON_SYNONYMOUS_CODING	chr1	153926078	T	C	p.Met147Val	0.4	171		0		chr1:153926078	ENST00000368633
CREB3L4	rs11264743	MODERATE	NON_SYNONYMOUS_CODING	chr1	153941514	C	T	p.Pro95Ser	0.43662	209		0		chr1:153941514	ENST00000431292
NUP210L	rs11264875	MODERATE	NON_SYNONYMOUS_CODING	chr1	153994647	C	T	p.Val424Ile	0.390476	263		0		chr1:153994647	ENST00000368553
AQP10	rs6668968	MODERATE	NON_SYNONYMOUS_CODING	chr1	154293675	G	A	p.Arg15Gln	0.533333	164		0		chr1:154293675	ENST00000484864		Cytoplasmic
AQP10	rs6685323	MODERATE	NON_SYNONYMOUS_CODING	chr1	154295592	C	T	p.His123Tyr	0.4	134		0		chr1:154295592	ENST00000484864		Extracellular
TDRD10	rs3811448	MODERATE	NON_SYNONYMOUS_CODING	chr1	154516578	G	A	p.Val215Ile	0.468085	277		0		chr1:154516578	ENST00000368482		Tudor
ADAR	rs2229857	MODERATE	NON_SYNONYMOUS_CODING	chr1	154573967	T	C	p.Lys89Arg	0.485437	372		0		chr1:154573967	ENST00000368471
ADAR	rs1466731	MODERATE	NON_SYNONYMOUS_CODING	chr1	154574820	T	C	p.Arg143Gly	1	312		0		chr1:154574820	ENST00000292205
ADAR	rs6426859	MODERATE	NON_SYNONYMOUS_CODING	chr1	154600372	A	G	p.Ser35Pro	1	439		0		chr1:154600372	ENST00000292205
ADAM15	rs6427128	MODERATE	NON_SYNONYMOUS_CODING	chr1	155026942	A	C	p.Lys201Thr	1	376		0		chr1:155026942	ENST00000531455
ADAM15	rs41264285	MODERATE	NON_SYNONYMOUS_CODING	chr1	155033918	C	T	p.Pro769Ser	0.535714	243		0		chr1:155033918	ENST00000356955		Cytoplasmic
THBS3	rs35154152	MODERATE	NON_SYNONYMOUS_CODING	chr1	155172725	T	C	p.Ser279Gly	0.642857	214		0		chr1:155172725	ENST00000368378
MTX1	rs760077	MODERATE	NON_SYNONYMOUS_CODING	chr1	155178782	A	T	p.Thr63Ser	1	349		0		chr1:155178782	ENST00000368376
MIB2	rs7418389	MODERATE	NON_SYNONYMOUS_CODING	chr1	1551927	T	C	p.Phe72Leu	1	604		0		chr1:1551927	ENST00000520777
CLK2	rs140726494	MODERATE	NON_SYNONYMOUS_CODING	chr1	155240635	C	T	p.Arg45His	0.575758	185		0		chr1:155240635	ENST00000536801
HCN3	rs61812063	MODERATE	NON_SYNONYMOUS_CODING	chr1	155247587	A	G	p.Lys69Arg	0.526786	440		0		chr1:155247587	ENST00000368358		Involved_in_subunit_assembly
ASH1L	rs4971053	MODERATE	NON_SYNONYMOUS_CODING	chr1	155408635	T	C	p.Thr1771Ala	1	1124		0		chr1:155408635	ENST00000392403
YY1AP1	rs61817761	MODERATE	NON_SYNONYMOUS_CODING	chr1	155657936	C	T	p.Gly35Glu	0.575758	149		0		chr1:155657936	ENST00000295566
GON4L	rs2297775	MODERATE	NON_SYNONYMOUS_CODING	chr1	155735012	T	C	p.Met1418Val	0.436364	304		0		chr1:155735012	ENST00000437809
SYT11	rs822522	MODERATE	NON_SYNONYMOUS_CODING	chr1	155837865	G	C	p.Gln48His	1	1302		0		chr1:155837865	ENST00000368324		Cytoplasmic
RIT1	rs493446	MODERATE	NON_SYNONYMOUS_CODING	chr1	155880573	C	G	p.Glu11Gln	1	904		0		chr1:155880573	ENST00000368322
UBQLN4	rs2297792	MODERATE	NON_SYNONYMOUS_CODING	chr1	156011444	T	C	p.Ile495Met	0.5	85		0		chr1:156011444	ENST00000368309
FHAD1	rs486557	MODERATE	NON_SYNONYMOUS_CODING	chr1	15616139	G	A	p.Arg182His	0.735294	232		0		chr1:15616139	ENST00000417793
PMF1	rs1052053	MODERATE	NON_SYNONYMOUS_CODING	chr1	156202173	A	G	p.Gln75Arg	0.347826	141		0		chr1:156202173	ENST00000567140
TMEM79	rs6684514	MODERATE	NON_SYNONYMOUS_CODING	chr1	156255456	G	A	p.Val147Met	0.447368	240		0		chr1:156255456	ENST00000405535
C1orf85	rs10908495	MODERATE	NON_SYNONYMOUS_CODING	chr1	156263940	T	C	p.Ile223Val	0.54717	614		0		chr1:156263940	ENST00000362007		Lumenal
C1orf85	rs10908496	MODERATE	NON_SYNONYMOUS_CODING	chr1	156264000	G	A	p.Pro203Ser	0.584906	279		0		chr1:156264000	ENST00000362007		Lumenal
RHBG	rs2245623	MODERATE	NON_SYNONYMOUS_CODING	chr1	156347131	G	A	p.Gly7Asp	1	415		0		chr1:156347131	ENST00000451864
IQGAP3	rs2488269	MODERATE	NON_SYNONYMOUS_CODING	chr1	156526444	T	C	p.Arg391Gly	1	185		0		chr1:156526444	ENST00000361170
APOA1BP	rs7516274	MODERATE	NON_SYNONYMOUS_CODING	chr1	156561651	G	C	p.Val19Leu	1	922		0		chr1:156561651	ENST00000368235		Mitochondrion
APOA1BP	rs6427321	MODERATE	NON_SYNONYMOUS_CODING	chr1	156563375	G	A	p.Gly231Glu	1	417		0		chr1:156563375	ENST00000368233
APOA1BP	rs6427322	MODERATE	NON_SYNONYMOUS_CODING	chr1	156563726	A	C	p.Ile221Leu	1	662		0		chr1:156563726	ENST00000368234
APOA1BP	rs6668178	MODERATE	NON_SYNONYMOUS_CODING	chr1	156563813	G	A	p.Glu250Lys	1	1142		0		chr1:156563813	ENST00000368234
GPATCH4		HIGH	FRAME_SHIFT	chr1	156565049	A	AAC	p.X356X	1	3070		0		chr1:156565049	ENST00000368232
NES	rs3748570	MODERATE	NON_SYNONYMOUS_CODING	chr1	156640156	G	A	p.Pro1275Leu	0.5	141		0		chr1:156640156	ENST00000368223		Tail
RRNAD1	rs4311877	MODERATE	NON_SYNONYMOUS_CODING	chr1	156705593	G	C	p.Arg238Pro	1	734		0		chr1:156705593	ENST00000368218
PEAR1	rs1952294	MODERATE	NON_SYNONYMOUS_CODING	chr1	156877457	T	C	p.Ser234Pro	1	741		0		chr1:156877457	ENST00000338302
PEAR1	rs11264581	MODERATE	NON_SYNONYMOUS_CODING	chr1	156883493	G	A	p.Arg885His	0.9	295		0		chr1:156883493	ENST00000338302
PEAR1	rs12137505	MODERATE	NON_SYNONYMOUS_CODING	chr1	156883546	A	G	p.Asn903Asp	0.875	244		0		chr1:156883546	ENST00000338302
ARHGEF11	rs945508	MODERATE	NON_SYNONYMOUS_CODING	chr1	156907081	T	C	p.His843Arg	1	543		0		chr1:156907081	ENST00000315174
ARHGEF11	rs868188	MODERATE	NON_SYNONYMOUS_CODING	chr1	156907115	T	C	p.Ser832Gly	1	366		0		chr1:156907115	ENST00000315174
FCRL5	rs6427384	MODERATE	NON_SYNONYMOUS_CODING	chr1	157508882	C	T	p.Val466Ile	1	298		0		chr1:157508882	ENST00000368190
FCRL5	rs2012199	MODERATE	NON_SYNONYMOUS_CODING	chr1	157509025	C	T	p.Gly418Asp	1	883		0		chr1:157509025	ENST00000368190
FCRL5	rs6679793	MODERATE	NON_SYNONYMOUS_CODING	chr1	157514097	A	G	p.Tyr267His	1	627		0		chr1:157514097	ENST00000368190
FCRL3	rs7522061	MODERATE	NON_SYNONYMOUS_CODING	chr1	157668390	T	C	p.Asn28Asp	0.347826	128		0		chr1:157668390	ENST00000496769
CELA2B	rs6429745	MODERATE	NON_SYNONYMOUS_CODING	chr1	15812432	A	G	p.Gln177Arg	1	670		0		chr1:15812432	ENST00000375910
CASP9		HIGH	FRAME_SHIFT	chr1	15820307	A	AC	p.X413X	0.230769	330		0		chr1:15820307	ENST00000546424
CASP9	rs1052576	MODERATE	NON_SYNONYMOUS_CODING	chr1	15832543	T	C	p.Gln221Arg	0.285714	80		0		chr1:15832543	ENST00000546424
OR10R2	rs6679056	MODERATE	NON_SYNONYMOUS_CODING	chr1	158450314	A	G	p.Glu216Gly	0.480769	212		0		chr1:158450314	ENST00000368152		Extracellular
OR10R2	rs1418843	MODERATE	NON_SYNONYMOUS_CODING	chr1	158450382	C	T	p.Leu239Phe	0.424658	233		0		chr1:158450382	ENST00000368152		Cytoplasmic
OR10X1	rs863362	HIGH	STOP_GAINED	chr1	158549492	C	T	p.Trp66*	0.451613	115		0		chr1:158549492	ENST00000368150		Cytoplasmic
OR10X1	rs863363	MODERATE	NON_SYNONYMOUS_CODING	chr1	158549511	A	G	p.Ile60Thr	0.410256	122		0		chr1:158549511	ENST00000368150		Transmembrane_region
SPTA1	rs857725	MODERATE	NON_SYNONYMOUS_CODING	chr1	158607935	T	G	p.Lys1693Gln	0.484663	508		0		chr1:158607935	ENST00000368148
SPTA1	rs863931	MODERATE	NON_SYNONYMOUS_CODING	chr1	158612236	A	G	p.Cys1568Arg	0.483607	412		0		chr1:158612236	ENST00000368148
SPTA1	rs2482965	MODERATE	NON_SYNONYMOUS_CODING	chr1	158619728	A	C	p.Ser1163Ala	1	1135		0		chr1:158619728	ENST00000368148
SPTA1	rs200230894	MODERATE	NON_SYNONYMOUS_CODING	chr1	158622275	C	G	p.Lys1119Asn	0.540323	496		0		chr1:158622275	ENST00000368148
SPTA1	rs201845149	MODERATE	NON_SYNONYMOUS_CODING	chr1	158637704	C	T	p.Arg661His	0.467391	311		0		chr1:158637704	ENST00000368148
OR6K3	rs28568406	MODERATE	NON_SYNONYMOUS_CODING	chr1	158687163	G	A	p.Pro264Leu	0.434783	121		0		chr1:158687163	ENST00000368146		Transmembrane_region
OR6K3		MODERATE	NON_SYNONYMOUS_CODING	chr1	158687719	T	C	p.Ile79Val	0.578947	237		0		chr1:158687719	ENST00000368146		Transmembrane_region
OR6N1	rs1864346	MODERATE	NON_SYNONYMOUS_CODING	chr1	158736445	C	T	p.Ala10Thr	0.4375	53		0		chr1:158736445	ENST00000335094		Extracellular
IFI16	rs866484	MODERATE	NON_SYNONYMOUS_CODING	chr1	158986477	G	C	p.Ser21Thr	0.538462	117		0		chr1:158986477	ENST00000474473
IFI16	rs1057027	MODERATE	NON_SYNONYMOUS_CODING	chr1	159002377	C	A	p.Arg409Ser	0.46875	129		0		chr1:159002377	ENST00000448393
IFI16	rs1057028	MODERATE	NON_SYNONYMOUS_CODING	chr1	159002389	T	A	p.Tyr413Asn	0.428571	124		0		chr1:159002389	ENST00000448393
IFI16	rs6940	MODERATE	NON_SYNONYMOUS_CODING	chr1	159024668	A	T	p.Thr779Ser	0.290323	112		0		chr1:159024668	ENST00000295809
AGMAT	rs11580170	MODERATE	NON_SYNONYMOUS_CODING	chr1	15909744	C	T	p.Arg140Gln	0.244186	76		0		chr1:15909744	ENST00000375826
DARC	rs12075	MODERATE	NON_SYNONYMOUS_CODING	chr1	159175354	G	A	p.Gly44Asp	1	625		0		chr1:159175354	ENST00000435307
OR10J1	rs10908722	MODERATE	NON_SYNONYMOUS_CODING	chr1	159409734	G	T	p.Met62Ile	1	1905		0		chr1:159409734	ENST00000423932		Cytoplasmic
OR10J1	rs12409540	HIGH	STOP_GAINED	chr1	159410340	T	A	p.Cys264*	0.326087	98		0		chr1:159410340	ENST00000423932		Transmembrane_region
C1orf204	rs2501340	MODERATE	NON_SYNONYMOUS_CODING	chr1	159824967	G	C	p.Gln21Glu	1	595		0		chr1:159824967	ENST00000368102
TAGLN2	rs117992632	MODERATE	NON_SYNONYMOUS_CODING	chr1	159890163	T	A	p.Gln67Leu	0.441558	244		0		chr1:159890163	ENST00000368096
SLC35E2B	rs12729295	MODERATE	NON_SYNONYMOUS_CODING	chr1	1599812	C	T	p.Val312Ile	0.705882	136		0		chr1:1599812	ENST00000378662
PIGM	rs12409352	MODERATE	NON_SYNONYMOUS_CODING	chr1	160000435	A	T	p.Phe365Leu	0.460526	467		0		chr1:160000435	ENST00000368090		Transmembrane_region
ATP1A4	rs6427504	MODERATE	NON_SYNONYMOUS_CODING	chr1	160124875	G	A	p.Gly83Asp	0.428571	239		0		chr1:160124875	ENST00000368081		Cytoplasmic
SLAMF1	rs3796504	MODERATE	NON_SYNONYMOUS_CODING	chr1	160580549	G	T	p.Pro333Thr	0.636364	232		0		chr1:160580549	ENST00000302035		Cytoplasmic
SLAMF1	rs149160	MODERATE	NON_SYNONYMOUS_CODING	chr1	160585554	C	G	p.Ser290Thr	1	549		0		chr1:160585554	ENST00000355199
LY9	rs509749	MODERATE	NON_SYNONYMOUS_CODING	chr1	160793560	A	G	p.Met602Val	0.416667	66		0		chr1:160793560	ENST00000263285
ITLN1	rs2274907	MODERATE	NON_SYNONYMOUS_CODING	chr1	160851826	A	T	p.Val109Asp	0.470588	241		0		chr1:160851826	ENST00000326245
ITLN2	rs6680969	MODERATE	NON_SYNONYMOUS_CODING	chr1	160920966	C	T	p.Arg103His	0.6875	229		0		chr1:160920966	ENST00000368029
ARHGAP30	rs3813609	MODERATE	NON_SYNONYMOUS_CODING	chr1	161019040	G	C	p.Leu591Val	1	659		0		chr1:161019040	ENST00000368016
PVRL4	rs35434391	MODERATE	NON_SYNONYMOUS_CODING	chr1	161049509	G	T	p.Pro104Thr	0.365854	115		0		chr1:161049509	ENST00000368012
FCGR2A	rs1801274	MODERATE	NON_SYNONYMOUS_CODING	chr1	161479745	A	G	p.His167Arg	1	1681		0		chr1:161479745	ENST00000271450
HSPA6	rs140320557	HIGH	STOP_GAINED	chr1	161495757	C	T	p.Gln437*	0.36	96		0		chr1:161495757	ENST00000309758
FCGR3B	rs76714703	MODERATE	NON_SYNONYMOUS_CODING	chr1	161599693	T	C	p.Asn65Ser	0.583333	252		0		chr1:161599693	ENST00000367964
FCRLB	rs35002732	MODERATE	NON_SYNONYMOUS_CODING	chr1	161693199	C	T	p.Thr32Ile	0.529412	171		0		chr1:161693199	ENST00000392158
OLFML2B	rs2499836	MODERATE	NON_SYNONYMOUS_CODING	chr1	161967681	A	G	p.Trp471Arg	0.527778	174		0		chr1:161967681	ENST00000367940
OLFML2B	rs4656343	MODERATE	NON_SYNONYMOUS_CODING	chr1	161969986	G	A	p.Pro290Leu	0.5	156		0		chr1:161969986	ENST00000367940
C1orf111	rs164181	MODERATE	NON_SYNONYMOUS_CODING	chr1	162345091	G	A	p.Ala69Val	0.969697	402		0		chr1:162345091	ENST00000367935
C1orf110	rs77227460	MODERATE	NON_SYNONYMOUS_CODING	chr1	162825457	C	A	p.Arg93Ser	0.309524	100		0		chr1:162825457	ENST00000367910
CLCNKA	rs10927887	MODERATE	NON_SYNONYMOUS_CODING	chr1	16351275	A	G	p.Arg83Gly	1	980		0		chr1:16351275	ENST00000420078
CLCNKA	rs1805152	MODERATE	NON_SYNONYMOUS_CODING	chr1	16356501	G	A	p.Ala447Thr	0.984375	709		0		chr1:16356501	ENST00000420078
CLCNKB	rs2015352	MODERATE	NON_SYNONYMOUS_CODING	chr1	16371067	G	T	p.Arg27Leu	1	753		0		chr1:16371067	ENST00000375679		Cytoplasmic
CLCNKB	rs1889789	MODERATE	NON_SYNONYMOUS_CODING	chr1	16375063	C	G	p.Ala214Gly	1	830		0		chr1:16375063	ENST00000375679		Transmembrane_region
CLCNKB	rs7367494	MODERATE	NON_SYNONYMOUS_CODING	chr1	16376191	C	T	p.Ala287Val	1	336		0		chr1:16376191	ENST00000375679		Transmembrane_region
CLCNKB	rs5253	MODERATE	NON_SYNONYMOUS_CODING	chr1	16380196	T	C	p.Met562Thr	1	1091		0		chr1:16380196	ENST00000375679
CLCNKB	rs2275166	MODERATE	NON_SYNONYMOUS_CODING	chr1	16380243	A	G	p.Lys578Glu	1	838		0		chr1:16380243	ENST00000375679
FAM131C	rs77667563	MODERATE	NON_SYNONYMOUS_CODING	chr1	16385042	G	A	p.Arg245Trp	0.666667	99		0		chr1:16385042	ENST00000375662
FAM131C	rs11576236	MODERATE	NON_SYNONYMOUS_CODING	chr1	16386447	G	C	p.Pro123Arg	1	213		0		chr1:16386447	ENST00000375662
CDK11A	rs72909030	MODERATE	NON_SYNONYMOUS_CODING	chr1	1650832	A	G	p.Val97Ala	0.402299	218		0		chr1:1650832	ENST00000404249
CDK11A	rs1059831	MODERATE	NON_SYNONYMOUS_CODING	chr1	1650845	G	A	p.Arg93Trp	0.583333	426		0		chr1:1650845	ENST00000404249
MGST3	rs9333378	HIGH	SPLICE_SITE_ACCEPTOR	chr1	165601466	G	A		1	566		0		chr1:165601466	ENST00000367883
MGST3	rs6667681	MODERATE	NON_SYNONYMOUS_CODING	chr1	165630698	A	G	p.Thr119Ala	0.583333	111		0		chr1:165630698	ENST00000367888
FBXO42	rs12069239	MODERATE	NON_SYNONYMOUS_CODING	chr1	16577908	G	C	p.Pro471Ala	0.3	78		0		chr1:16577908	ENST00000375592
SLC35E2	rs61777509	MODERATE	NON_SYNONYMOUS_CODING	chr1	1666175	C	T	p.Arg229His	0.3125	85		0		chr1:1666175	ENST00000400924
GPA33		MODERATE	NON_SYNONYMOUS_CODING	chr1	167025008	T	C	p.Glu217Gly	0.380952	175		0		chr1:167025008	ENST00000367868
SPATA21	rs4661746	MODERATE	NON_SYNONYMOUS_CODING	chr1	16736132	T	C	p.Gln184Arg	0.974359	470		0		chr1:16736132	ENST00000335496
ADCY10	rs16859886	MODERATE	NON_SYNONYMOUS_CODING	chr1	167865871	G	A	p.Thr81Met	0.513043	427		0		chr1:167865871	ENST00000545172
DCAF6	rs11558511	MODERATE	NON_SYNONYMOUS_CODING	chr1	168013850	T	C	p.Val624Ala	0.536232	320		0		chr1:168013850	ENST00000367840
AL355149.2	rs156880	MODERATE	NON_SYNONYMOUS_CODING	chr1	16866033	C	T	p.Pro158Leu	0.333333	36		0		chr1:16866033	ENST00000601199
C1orf114	rs35107735	MODERATE	NON_SYNONYMOUS_CODING	chr1	169390957	A	T	p.Phe238Ile	0.351064	199		0		chr1:169390957	ENST00000545005
C1orf114	rs3820059	MODERATE	NON_SYNONYMOUS_CODING	chr1	169391154	A	G	p.Phe172Ser	0.415385	205		0		chr1:169391154	ENST00000545005
F5	rs6030	MODERATE	NON_SYNONYMOUS_CODING	chr1	169498975	T	C	p.Met1769Val	0.37013	316		0		chr1:169498975	ENST00000367796
F5	rs6032	MODERATE	NON_SYNONYMOUS_CODING	chr1	169511555	T	C	p.Lys930Glu	0.447154	358		0		chr1:169511555	ENST00000367796
F5	rs4525	MODERATE	NON_SYNONYMOUS_CODING	chr1	169511734	T	C	p.His870Arg	0.466667	226		0		chr1:169511734	ENST00000367796
F5	rs4524	MODERATE	NON_SYNONYMOUS_CODING	chr1	169511755	T	C	p.Lys863Arg	0.473684	173		0		chr1:169511755	ENST00000367796
F5	rs6025	MODERATE	NON_SYNONYMOUS_CODING	chr1	169519049	T	C	p.Gln534Arg	1	910		0		chr1:169519049	ENST00000367797
SELL	rs1131498	MODERATE	NON_SYNONYMOUS_CODING	chr1	169676486	A	G	p.Phe206Leu	0.5	214		0		chr1:169676486	ENST00000236147		Extracellular
C1orf112	rs6668114	MODERATE	NON_SYNONYMOUS_CODING	chr1	169768080	C	A	p.Asp44Glu	0.531915	403		0		chr1:169768080	ENST00000456684
METTL11B	rs6427235	MODERATE	NON_SYNONYMOUS_CODING	chr1	170135760	T	C	p.Ser150Pro	0.428571	257		0		chr1:170135760	ENST00000439373
GORAB	rs913257	MODERATE	NON_SYNONYMOUS_CODING	chr1	170521376	G	A	p.Glu320Lys	0.538462	352		0		chr1:170521376	ENST00000367763
FMO3	rs2266782	MODERATE	NON_SYNONYMOUS_CODING	chr1	171076966	G	A	p.Glu95Lys	0.406977	240		0		chr1:171076966	ENST00000538429
FMO3	rs2266780	MODERATE	NON_SYNONYMOUS_CODING	chr1	171083242	A	G	p.Glu308Gly	0.5	142		0		chr1:171083242	ENST00000392085
FMO6P	rs1736565	HIGH	STOP_GAINED	chr1	171112490	C	T	p.Gln105*	0.473684	104		0		chr1:171112490	ENST00000236166
FMO6P	rs2272797	MODERATE	NON_SYNONYMOUS_CODING	chr1	171118840	G	A	p.Val257Ile	0.393443	187		0		chr1:171118840	ENST00000236166
FMO6P	rs7889839	MODERATE	NON_SYNONYMOUS_CODING	chr1	171121173	A	G	p.Met318Val	0.486486	279		0		chr1:171121173	ENST00000236166
PRRC2C	rs235468	MODERATE	NON_SYNONYMOUS_CODING	chr1	171514731	C	G	p.Ser1626Cys	1	1149		0		chr1:171514731	ENST00000392078
PRRC2C	rs12025905	MODERATE	NON_SYNONYMOUS_CODING	chr1	171526910	G	A	p.Ala1887Thr	0.466667	82		0		chr1:171526910	ENST00000392078
METTL13	rs2232816	MODERATE	NON_SYNONYMOUS_CODING	chr1	171753039	A	G	p.Met19Val	0.484375	250		0		chr1:171753039	ENST00000362019
PIGC	rs1063412	MODERATE	NON_SYNONYMOUS_CODING	chr1	172410967	G	A	p.Pro266Ser	0.590909	170		0		chr1:172410967	ENST00000367728
C1orf105	rs1129942	MODERATE	NON_SYNONYMOUS_CODING	chr1	172437592	G	A	p.Ser137Asn	1	196		0		chr1:172437592	ENST00000367727
CROCC	rs6586566	MODERATE	NON_SYNONYMOUS_CODING	chr1	17248532	A	G	p.Arg7Gly	1	433		0		chr1:17248532	ENST00000375541
CROCC	rs57442576	MODERATE	NON_SYNONYMOUS_CODING	chr1	17263290	G	A	p.Arg372Gln	0.450704	234		0		chr1:17263290	ENST00000375541
CROCC	rs9435714	MODERATE	NON_SYNONYMOUS_CODING	chr1	17266536	G	C	p.Asp586His	0.602041	437		0		chr1:17266536	ENST00000375541
CROCC	rs56278097	MODERATE	NON_SYNONYMOUS_CODING	chr1	17295764	A	G	p.Ser1744Gly	0.23913	54		0		chr1:17295764	ENST00000375541
ATP13A2	rs3170740	MODERATE	NON_SYNONYMOUS_CODING	chr1	17312743	C	T	p.Ala1072Thr	0.619048	286		0		chr1:17312743	ENST00000341676
SLC9C2	rs16846206	MODERATE	NON_SYNONYMOUS_CODING	chr1	173516871	G	C	p.Ala505Gly	1	969		0		chr1:173516871	ENST00000367714
PADI2	rs2076615	MODERATE	NON_SYNONYMOUS_CODING	chr1	17413121	A	C	p.Val162Gly	0.207547	42		0		chr1:17413121	ENST00000444885
TNN	rs2072032	MODERATE	NON_SYNONYMOUS_CODING	chr1	175046789	A	G	p.Arg79Gly	1	681		0		chr1:175046789	ENST00000239462
KIAA0040		MODERATE	CODON_CHANGE_PLUS_CODON_INSERTION	chr1	175129924	C	CCTT	p.Lys75X	0.361111	670		0		chr1:175129924	ENST00000545251
TNR	rs859427	MODERATE	NON_SYNONYMOUS_CODING	chr1	175348723	C	T	p.Arg643Lys	0.5	186		0		chr1:175348723	ENST00000367674
TNR	rs2239819	MODERATE	NON_SYNONYMOUS_CODING	chr1	175375469	C	A	p.Ala128Ser	0.392157	161		0		chr1:175375469	ENST00000367674
TNR	rs859398	MODERATE	NON_SYNONYMOUS_CODING	chr1	175375802	T	C	p.Ile17Val	0.583333	162		0		chr1:175375802	ENST00000367674
PADI4	rs11203366	MODERATE	NON_SYNONYMOUS_CODING	chr1	17657534	G	A	p.Gly55Ser	0.571429	339		0		chr1:17657534	ENST00000375453
PADI4	rs11203367	MODERATE	NON_SYNONYMOUS_CODING	chr1	17657616	T	C	p.Val82Ala	0.663158	524		0		chr1:17657616	ENST00000375453
ASTN1	rs2281180	MODERATE	NON_SYNONYMOUS_CODING	chr1	176863836	G	C	p.His942Gln	1	670		0		chr1:176863836	ENST00000367654
ASTN1	rs2228956	MODERATE	NON_SYNONYMOUS_CODING	chr1	176863867	T	C	p.His932Arg	1	1102		0		chr1:176863867	ENST00000367654
FAM5B	rs3176443	MODERATE	NON_SYNONYMOUS_CODING	chr1	177247854	C	G	p.Leu390Val	0.98913	1081		0		chr1:177247854	ENST00000361539
SEC16B	rs61745560	MODERATE	NON_SYNONYMOUS_CODING	chr1	177902387	C	A	p.Ala929Ser	0.973684	448		0		chr1:177902387	ENST00000308284
SEC16B	rs3813649	MODERATE	NON_SYNONYMOUS_CODING	chr1	177902725	C	T	p.Ser873Asn	1	444		0		chr1:177902725	ENST00000308284
SEC16B	rs591120	MODERATE	NON_SYNONYMOUS_CODING	chr1	177902753	G	C	p.Pro864Ala	1	336		0		chr1:177902753	ENST00000308284
SEC16B	rs7522194	MODERATE	NON_SYNONYMOUS_CODING	chr1	177905469	C	A	p.Gln845His	1	828		0		chr1:177905469	ENST00000308284
SEC16B	rs842192	MODERATE	NON_SYNONYMOUS_CODING	chr1	177915474	A	C	p.Ile620Ser	0.969697	390		0		chr1:177915474	ENST00000464631
C1orf220	rs12141152	HIGH	SPLICE_SITE_DONOR	chr1	178514165	C	T		1	444		0		chr1:178514165	ENST00000319387
ABL2	rs56004467	HIGH	SPLICE_SITE_DONOR	chr1	179079416	C	T		0.320755	164		0		chr1:179079416	ENST00000344730
AXDND1		MODERATE	CODON_DELETION	chr1	179504025	AAAG	A	p.X987Lys	0.756098	1547		0		chr1:179504025	ENST00000367618
TDRD5	rs61310274	MODERATE	NON_SYNONYMOUS_CODING	chr1	179562740	G	C	p.Arg126Ser	1	860		0		chr1:179562740	ENST00000444136
TOR1AIP1	rs1281378	MODERATE	NON_SYNONYMOUS_CODING	chr1	179852074	T	C	p.Met146Thr	0.958333	529		0		chr1:179852074	ENST00000528443
TOR1AIP1	rs2245425	HIGH	SPLICE_SITE_ACCEPTOR	chr1	179858444	G	A		1	792		0		chr1:179858444	ENST00000531726
TOR1AIP1	rs609521	MODERATE	NON_SYNONYMOUS_CODING	chr1	179876988	C	G	p.Pro277Arg	1	440		0		chr1:179876988	ENST00000528443
CEP350	rs2477120	MODERATE	NON_SYNONYMOUS_CODING	chr1	179989742	G	C	p.Glu945Gln	1	804		0		chr1:179989742	ENST00000367607
ARHGEF10L	rs2270976	MODERATE	NON_SYNONYMOUS_CODING	chr1	18023690	A	G	p.Ile992Val	0.723404	311		0		chr1:18023690	ENST00000375408
LHX4	rs7536561	MODERATE	NON_SYNONYMOUS_CODING	chr1	180243524	A	G	p.Asn328Ser	0.43662	219		0		chr1:180243524	ENST00000263726
KIAA1614	rs10732273	MODERATE	NON_SYNONYMOUS_CODING	chr1	180885430	T	C	p.Leu64Pro	1	628		0		chr1:180885430	ENST00000367588
KIAA1614	rs3795504	MODERATE	NON_SYNONYMOUS_CODING	chr1	180905448	G	T	p.Leu801Phe	0.447368	146		0		chr1:180905448	ENST00000367588
KIAA1614		HIGH	STOP_GAINED	chr1	180905647	C	T	p.Gln489*	0.25641	78		0		chr1:180905647	ENST00000367587
KIAA1614	rs2331995	MODERATE	NON_SYNONYMOUS_CODING	chr1	180913597	A	G	p.Asn699Asp	1	794		0		chr1:180913597	ENST00000367587
IER5	rs3747955	MODERATE	NON_SYNONYMOUS_CODING	chr1	181058313	G	A	p.Arg92His	0.615385	159		0		chr1:181058313	ENST00000367577
CACNA1E	rs704326	MODERATE	NON_SYNONYMOUS_CODING	chr1	181759657	G	A	p.Ala1955Thr	0.456522	190		0		chr1:181759657	ENST00000367573		Cytoplasmic
RNASEL	rs627928	MODERATE	NON_SYNONYMOUS_CODING	chr1	182551337	A	C	p.Asp541Glu	0.449275	411		0		chr1:182551337	ENST00000539397
RGS16	rs1144566	MODERATE	NON_SYNONYMOUS_CODING	chr1	182569626	T	C	p.His137Arg	1	627		0		chr1:182569626	ENST00000367558		RGS
LAMC1	rs20563	MODERATE	NON_SYNONYMOUS_CODING	chr1	183085755	A	G	p.Ile458Val	0.47619	310		0		chr1:183085755	ENST00000258341
LAMC1	rs20558	MODERATE	NON_SYNONYMOUS_CODING	chr1	183094547	T	C	p.Leu888Pro	0.482759	245		0		chr1:183094547	ENST00000258341
NCF2	rs2274064	MODERATE	NON_SYNONYMOUS_CODING	chr1	183542387	T	C	p.Lys181Arg	0.398693	330		0		chr1:183542387	ENST00000367536
APOBEC4	rs1174657	MODERATE	NON_SYNONYMOUS_CODING	chr1	183616926	T	C	p.Lys331Glu	0.364706	190		0		chr1:183616926	ENST00000308641
TSEN15	rs2274432	MODERATE	NON_SYNONYMOUS_CODING	chr1	184020945	G	A	p.Gly19Asp	0.321429	87		0		chr1:184020945	ENST00000533373
TSEN15	rs1046934	MODERATE	NON_SYNONYMOUS_CODING	chr1	184023529	A	C	p.Gln59His	0.236364	59		0		chr1:184023529	ENST00000533373
TMEM52	rs72634869	MODERATE	NON_SYNONYMOUS_CODING	chr1	1849923	C	A	p.Ala25Ser	0.285714	82		0		chr1:1849923	ENST00000378602
SWT1	rs10489579	MODERATE	NON_SYNONYMOUS_CODING	chr1	185143721	A	G	p.Ile148Val	0.5	179		0		chr1:185143721	ENST00000367501
SWT1	rs6698109	MODERATE	NON_SYNONYMOUS_CODING	chr1	185171869	A	G	p.His536Arg	0.588235	491		0		chr1:185171869	ENST00000367501
HMCN1	rs12129650	MODERATE	NON_SYNONYMOUS_CODING	chr1	186026474	T	C	p.Ile2418Thr	0.483444	487		0		chr1:186026474	ENST00000367492
PRG4	rs68069719	MODERATE	NON_SYNONYMOUS_CODING	chr1	186277088	G	C	p.Cys746Ser	1	1492		0		chr1:186277088	ENST00000445192
PLA2G4A	rs2307198	MODERATE	NON_SYNONYMOUS_CODING	chr1	186946912	G	A	p.Arg651Lys	0.978022	1056		0		chr1:186946912	ENST00000367466
KLHDC7A	rs2992755	MODERATE	NON_SYNONYMOUS_CODING	chr1	18807897	C	G	p.Pro141Arg	0.3125	37		0		chr1:18807897	ENST00000400664
KLHDC7A	rs11261022	MODERATE	NON_SYNONYMOUS_CODING	chr1	18807953	C	A	p.Arg160Ser	0.368421	121		0		chr1:18807953	ENST00000400664
KLHDC7A	rs2992753	MODERATE	NON_SYNONYMOUS_CODING	chr1	18808292	C	A	p.His273Asn	0.25	67		0		chr1:18808292	ENST00000400664
C1orf222	rs35269416	MODERATE	NON_SYNONYMOUS_CODING	chr1	1900186	T	C	p.Lys378Arg	0.658537	429		0		chr1:1900186	ENST00000270720
C1orf222	rs16824588	MODERATE	NON_SYNONYMOUS_CODING	chr1	1900232	T	C	p.Ile363Val	0.6	379		0		chr1:1900232	ENST00000270720
TAS1R2	rs28374389	MODERATE	NON_SYNONYMOUS_CODING	chr1	19175846	T	C	p.Ile486Val	0.3	69		0		chr1:19175846	ENST00000375371		Extracellular
TAS1R2	rs9701796	MODERATE	NON_SYNONYMOUS_CODING	chr1	19186129	G	C	p.Ser9Cys	1	439		0		chr1:19186129	ENST00000375371
ALDH4A1	rs2230709	MODERATE	NON_SYNONYMOUS_CODING	chr1	19201928	C	T	p.Val470Ile	0.275362	88		0		chr1:19201928	ENST00000375341
GLRX2	rs10921310	MODERATE	NON_SYNONYMOUS_CODING	chr1	193074651	T	A	p.Arg40Trp	1	194		0		chr1:193074651	ENST00000367440
B3GALT2	rs41265203	MODERATE	NON_SYNONYMOUS_CODING	chr1	193150326	A	C	p.Tyr123Asp	0.487179	180		0		chr1:193150326	ENST00000367434		Lumenal
AKR7L	rs2982534	MODERATE	NON_SYNONYMOUS_CODING	chr1	19593826	A	C	p.Phe144Val	0.283582	85		0		chr1:19593826	ENST00000420396
AKR7L	rs2235795	MODERATE	NON_SYNONYMOUS_CODING	chr1	19595137	C	T	p.Ala77Thr	0.716981	339		0		chr1:19595137	ENST00000420396
AKR7L		HIGH	FRAME_SHIFT	chr1	19597274	TC	T	c.31*>-C	0.424242	634		0		chr1:19597274	ENST00000420396
AKR7A3	rs1738025	MODERATE	NON_SYNONYMOUS_CODING	chr1	19609254	T	C	p.Thr323Ala	1	1203		0		chr1:19609254	ENST00000361640
AKR7A3	rs1738023	MODERATE	NON_SYNONYMOUS_CODING	chr1	19611241	T	C	p.Asn215Asp	1	837		0		chr1:19611241	ENST00000361640
CFH	rs1065489	MODERATE	NON_SYNONYMOUS_CODING	chr1	196709774	G	T	p.Glu936Asp	0.566038	262		0		chr1:196709774	ENST00000367429
CFHR3	rs387111	HIGH	SPLICE_SITE_ACCEPTOR	chr1	196757874	G	A		0.470588	211		0		chr1:196757874	ENST00000367427
CFHR3	rs387107	MODERATE	NON_SYNONYMOUS_CODING	chr1	196757881	G	T	p.Cys207Phe	0.448718	214		0		chr1:196757881	ENST00000471440
CFHR4	rs10801578	MODERATE	NON_SYNONYMOUS_CODING	chr1	196874356	G	T	p.Glu124Asp	1	1598		0		chr1:196874356	ENST00000367416
CFHR4	rs7417769	MODERATE	NON_SYNONYMOUS_CODING	chr1	196876458	A	G	p.Asn209Ser	0.480519	276		0		chr1:196876458	ENST00000367416
CFHR4	rs10494745	MODERATE	NON_SYNONYMOUS_CODING	chr1	196887457	G	A	p.Gly552Glu	0.429825	333		0		chr1:196887457	ENST00000367416
CFHR5	rs35662416	MODERATE	NON_SYNONYMOUS_CODING	chr1	196967354	G	A	p.Arg380His	0.471698	365		0		chr1:196967354	ENST00000367414
F13B	rs6003	MODERATE	NON_SYNONYMOUS_CODING	chr1	197031021	C	T	p.Arg115His	1	1651		0		chr1:197031021	ENST00000367412
ASPM	rs3762271	MODERATE	NON_SYNONYMOUS_CODING	chr1	197070442	G	T	p.Leu2647Ile	0.465608	565		0		chr1:197070442	ENST00000367409
ASPM	rs41310927	MODERATE	NON_SYNONYMOUS_CODING	chr1	197070697	T	C	p.Ser2562Gly	0.412791	374		0		chr1:197070697	ENST00000367409
ASPM	rs964201	MODERATE	NON_SYNONYMOUS_CODING	chr1	197070901	A	G	p.Tyr2494His	0.994186	2057		0		chr1:197070901	ENST00000367409
CRB1		MODERATE	NON_SYNONYMOUS_CODING	chr1	197390561	C	G	p.Leu535Val	0.481481	378		0		chr1:197390561	ENST00000538660
TMCO4	rs4515815	MODERATE	NON_SYNONYMOUS_CODING	chr1	20020994	C	T	p.Arg478His	0.277778	54		0		chr1:20020994	ENST00000375127
KIF14	rs75449932	MODERATE	NON_SYNONYMOUS_CODING	chr1	200534651	T	G	p.Ser1270Arg	0.530612	249		0		chr1:200534651	ENST00000367350
CACNA1S	rs12139527	MODERATE	NON_SYNONYMOUS_CODING	chr1	201009182	A	G	p.Leu1800Ser	0.45	159		0		chr1:201009182	ENST00000362061		Cytoplasmic
CACNA1S	rs12742169	MODERATE	NON_SYNONYMOUS_CODING	chr1	201052310	A	T	p.Leu458His	0.518519	303		0		chr1:201052310	ENST00000367338
CACNA1S	rs35534614	MODERATE	NON_SYNONYMOUS_CODING	chr1	201058513	C	T	p.Gly258Asp	0.460177	342		0		chr1:201058513	ENST00000367338
IGFN1	rs4915221	MODERATE	NON_SYNONYMOUS_CODING	chr1	201166383	G	A	p.Arg102His	0.466667	257		0		chr1:201166383	ENST00000451870
IGFN1	rs832156	MODERATE	NON_SYNONYMOUS_CODING	chr1	201175227	C	A	p.Asp402Glu	0.580645	191		0		chr1:201175227	ENST00000451870
IGFN1	rs9651057	MODERATE	NON_SYNONYMOUS_CODING	chr1	201175274	A	G	p.Gln418Arg	0.473684	176		0		chr1:201175274	ENST00000335211
IGFN1	rs1341631	MODERATE	NON_SYNONYMOUS_CODING	chr1	201175715	G	T	p.Arg565Leu	0.46875	151		0		chr1:201175715	ENST00000335211
IGFN1	rs10753895	MODERATE	NON_SYNONYMOUS_CODING	chr1	201176018	A	G	p.Asp666Gly	0.464286	139		0		chr1:201176018	ENST00000335211
IGFN1	rs12758143	MODERATE	NON_SYNONYMOUS_CODING	chr1	201178965	A	G	p.Ile1648Met	0.283333	65		0		chr1:201178965	ENST00000335211
IGFN1	rs12070919	MODERATE	NON_SYNONYMOUS_CODING	chr1	201181223	A	G	p.Asn2401Ser	1	849		0		chr1:201181223	ENST00000335211
PKP1	rs1626370	MODERATE	NON_SYNONYMOUS_CODING	chr1	201288955	G	A	p.Gly415Asp	0.463158	314		0		chr1:201288955	ENST00000352845
TNNT2	rs3730238	MODERATE	NON_SYNONYMOUS_CODING	chr1	201330429	T	C	p.Lys262Arg	0.433333	381		0		chr1:201330429	ENST00000458432
LAD1	rs35016536	MODERATE	CODON_CHANGE_PLUS_CODON_DELETION	chr1	201356001	CCCA	C	p.X176Gly	0.342105	562		0		chr1:201356001	ENST00000367313
LAD1	rs148439940	MODERATE	NON_SYNONYMOUS_CODING	chr1	201356006	C	A	p.Leu175Phe	0.297297	56		0		chr1:201356006	ENST00000367313
LAD1	rs3738281	MODERATE	NON_SYNONYMOUS_CODING	chr1	201358304	C	A	p.Ala70Ser	0.410256	135		0		chr1:201358304	ENST00000367313
RNF186	rs1541185	MODERATE	NON_SYNONYMOUS_CODING	chr1	20141528	C	T	p.Ala23Thr	0.673913	282		0		chr1:20141528	ENST00000375121
NAV1	rs2820289	MODERATE	NON_SYNONYMOUS_CODING	chr1	201777250	C	T	p.Ser879Leu	0.651163	282		0		chr1:201777250	ENST00000367295
SHISA4	rs2250377	MODERATE	NON_SYNONYMOUS_CODING	chr1	201860626	A	G	p.Ile159Met	0.434783	163		0		chr1:201860626	ENST00000362011
LMOD1	rs2820312	MODERATE	NON_SYNONYMOUS_CODING	chr1	201869257	G	A	p.Thr295Met	0.554217	354		0		chr1:201869257	ENST00000367288
RNPEP	rs3820439	MODERATE	NON_SYNONYMOUS_CODING	chr1	201973565	G	A	p.Val579Ile	0.515152	269		0		chr1:201973565	ENST00000295640
GPR37L1	rs3795595	MODERATE	NON_SYNONYMOUS_CODING	chr1	202092360	G	A	p.Gly90Asp	1	253		0		chr1:202092360	ENST00000367282		Extracellular
PPP1R12B	rs145838755	MODERATE	NON_SYNONYMOUS_CODING	chr1	202464773	G	A	p.Arg804Gln	0.544118	319		0		chr1:202464773	ENST00000406302
TMEM183A	rs6678040	MODERATE	NON_SYNONYMOUS_CODING	chr1	202977809	G	A	p.Ala80Thr	0.512821	184		0		chr1:202977809	ENST00000367242
PPFIA4	rs61821060	MODERATE	NON_SYNONYMOUS_CODING	chr1	203008174	G	C	p.Arg13Pro	1	833		0		chr1:203008174	ENST00000447715
PPFIA4		HIGH	FRAME_SHIFT	chr1	203023240	G	GGC	p.X585X	0.517241	817		0		chr1:203023240	ENST00000447715
CHI3L1	rs880633	MODERATE	NON_SYNONYMOUS_CODING	chr1	203152801	T	C	p.Arg145Gly	1	621		0		chr1:203152801	ENST00000255409
PLEKHA6	rs3795569	MODERATE	NON_SYNONYMOUS_CODING	chr1	204230581	G	A	p.Pro146Leu	1	200		0		chr1:204230581	ENST00000414478
PPP1R15B	rs3014626	MODERATE	NON_SYNONYMOUS_CODING	chr1	204379617	T	C	p.Asn308Ser	1	675		0		chr1:204379617	ENST00000367188
PIK3C2B	rs41302549	MODERATE	NON_SYNONYMOUS_CODING	chr1	204412588	T	C	p.Lys974Arg	0.545455	239		0		chr1:204412588	ENST00000424712
TMEM81	rs4951168	MODERATE	NON_SYNONYMOUS_CODING	chr1	205053219	C	T	p.Arg77Gln	0.4	129		0		chr1:205053219	ENST00000367167		Extracellular
DSTYK	rs3851294	MODERATE	NON_SYNONYMOUS_CODING	chr1	205130413	A	G	p.Cys641Arg	0.304348	66		0		chr1:205130413	ENST00000367162
TMCC2	rs1172147	HIGH	SPLICE_SITE_ACCEPTOR	chr1	205225457	G	A		0.363636	109		0		chr1:205225457	ENST00000367159
PM20D1	rs1361754	MODERATE	NON_SYNONYMOUS_CODING	chr1	205801872	A	G	p.Ile380Thr	0.428571	113		0		chr1:205801872	ENST00000367136
PM20D1	rs1104899	MODERATE	NON_SYNONYMOUS_CODING	chr1	205814485	G	A	p.Arg153Trp	0.368421	92		0		chr1:205814485	ENST00000367136
PM20D1	rs1891460	MODERATE	NON_SYNONYMOUS_CODING	chr1	205814497	T	C	p.Ile149Val	1	651		0		chr1:205814497	ENST00000367136
VWA5B1	rs10916769	MODERATE	NON_SYNONYMOUS_CODING	chr1	20662938	A	G	p.Lys634Arg	0.363636	60		0		chr1:20662938	ENST00000375083
C1orf147	rs2336940	MODERATE	NON_SYNONYMOUS_CODING	chr1	206665896	C	G	p.Gly213Ala	0.567164	323		0		chr1:206665896	ENST00000367119
IL19	rs2243191	MODERATE	NON_SYNONYMOUS_CODING	chr1	207015957	T	C	p.Phe213Ser	1	536		0		chr1:207015957	ENST00000340758
FCAMR	rs188207561	MODERATE	NON_SYNONYMOUS_CODING	chr1	207135723	G	A	p.His163Tyr	0.351351	148		0		chr1:207135723	ENST00000450945
C1orf116	rs2842726	MODERATE	NON_SYNONYMOUS_CODING	chr1	207195779	A	G	p.Ser444Pro	1	824		0		chr1:207195779	ENST00000359470
C4BPB	rs7542292	MODERATE	NON_SYNONYMOUS_CODING	chr1	207268779	A	G	p.Ser175Gly	1	315		0		chr1:207268779	ENST00000451804
C4BPA	rs4844573	MODERATE	NON_SYNONYMOUS_CODING	chr1	207304900	T	C	p.Ile300Thr	0.5	108		0		chr1:207304900	ENST00000367070
CR2	rs17617	MODERATE	NON_SYNONYMOUS_CODING	chr1	207653395	C	A	p.Ala976Glu	1	1182		0		chr1:207653395	ENST00000458541
CR1	rs3737002	MODERATE	NON_SYNONYMOUS_CODING	chr1	207760773	C	T	p.Thr958Met	0.978261	535		0		chr1:207760773	ENST00000534202
CR1	rs17259045	MODERATE	NON_SYNONYMOUS_CODING	chr1	207782707	A	G	p.Asn1990Ser	1	742		0		chr1:207782707	ENST00000367049
CR1	rs4844609	MODERATE	NON_SYNONYMOUS_CODING	chr1	207782916	A	T	p.Thr2060Ser	0.962264	604		0		chr1:207782916	ENST00000367049
CR1	rs2296160	MODERATE	NON_SYNONYMOUS_CODING	chr1	207795320	A	G	p.Thr2419Ala	1	549		0		chr1:207795320	ENST00000367049
CR1L	rs6683902	MODERATE	NON_SYNONYMOUS_CODING	chr1	207881557	A	G	p.Ile455Val	1	663		0		chr1:207881557	ENST00000508064
CR1L	rs116455739	MODERATE	NON_SYNONYMOUS_CODING	chr1	207890892	G	A	p.Val500Ile	0.333333	120		0		chr1:207890892	ENST00000508064
CD34	rs2179634	MODERATE	NON_SYNONYMOUS_CODING	chr1	208063067	G	A	p.Ala39Val	0.488095	302		0		chr1:208063067	ENST00000367036
CD34		HIGH	FRAME_SHIFT	chr1	208063100	G	GA	p.X28X	0.428571	262		0		chr1:208063100	ENST00000367036
PLXNA2	rs4844658	MODERATE	NON_SYNONYMOUS_CODING	chr1	208390162	T	C	p.Glu369Gly	0.510204	195		0		chr1:208390162	ENST00000367033
PLXNA2	rs3748735	MODERATE	NON_SYNONYMOUS_CODING	chr1	208390469	C	T	p.Ala267Thr	0.666667	266		0		chr1:208390469	ENST00000367033		Sema
CDA	rs2072671	MODERATE	NON_SYNONYMOUS_CODING	chr1	20915701	A	C	p.Lys27Gln	1	1410		0		chr1:20915701	ENST00000375071
LAMB3	rs2076222	MODERATE	NON_SYNONYMOUS_CODING	chr1	209791929	G	T	p.Ala926Asp	0.436782	450		0		chr1:209791929	ENST00000391911
LAMB3	rs2229466	MODERATE	NON_SYNONYMOUS_CODING	chr1	209797253	T	C	p.Asn690Ser	0.392308	309		0		chr1:209797253	ENST00000391911
LAMB3	rs2235542	MODERATE	NON_SYNONYMOUS_CODING	chr1	209807815	T	C	p.Asn181Asp	0.470588	321		0		chr1:209807815	ENST00000415782
DDOST	rs537816	MODERATE	NON_SYNONYMOUS_CODING	chr1	20987873	G	C	p.Arg8Gly	1	413		0		chr1:20987873	ENST00000415136
SYT14		MODERATE	NON_SYNONYMOUS_CODING	chr1	210332767	T	C	p.Met453Thr	0.494624	346		0		chr1:210332767	ENST00000399639
HHAT	rs34228541	MODERATE	NON_SYNONYMOUS_CODING	chr1	210577901	T	C	p.Cys189Arg	0.533981	417		0		chr1:210577901	ENST00000545154
DTL	rs3135474	MODERATE	NON_SYNONYMOUS_CODING	chr1	212273639	C	T	p.Ala436Val	1	244		0		chr1:212273639	ENST00000366991
DTL	rs6540718	MODERATE	NON_SYNONYMOUS_CODING	chr1	212274413	A	C	p.Lys694Thr	1	255		0		chr1:212274413	ENST00000366991
FAM71A	rs3122712	MODERATE	NON_SYNONYMOUS_CODING	chr1	212798977	A	G	p.Asn253Ser	0.516667	254		0		chr1:212798977	ENST00000294829
FAM71A	rs3122713	MODERATE	NON_SYNONYMOUS_CODING	chr1	212799870	A	G	p.Asn551Asp	1	592		0		chr1:212799870	ENST00000294829
FAM71A	rs3795842	MODERATE	NON_SYNONYMOUS_CODING	chr1	212799949	C	T	p.Thr577Met	1	301		0		chr1:212799949	ENST00000294829
NSL1	rs15702	MODERATE	NON_SYNONYMOUS_CODING	chr1	212911836	T	C	p.Met254Val	0.488636	323		0		chr1:212911836	ENST00000366977
C1orf227	rs10864004	MODERATE	NON_SYNONYMOUS_CODING	chr1	213009469	A	G	p.Ile8Thr	0.386364	138		0		chr1:213009469	ENST00000332912
ANGEL2	rs11542154	MODERATE	NON_SYNONYMOUS_CODING	chr1	213186531	G	A	p.Pro97Ser	0.541667	334		0		chr1:213186531	ENST00000366962
SMYD2	rs1134647	MODERATE	NON_SYNONYMOUS_CODING	chr1	214492286	G	A	p.Gly165Glu	1	1036		0		chr1:214492286	ENST00000415093
CENPF	rs2070065	MODERATE	NON_SYNONYMOUS_CODING	chr1	214811244	C	G	p.His494Gln	1	525		0		chr1:214811244	ENST00000366955
CENPF	rs3795524	MODERATE	NON_SYNONYMOUS_CODING	chr1	214813782	A	G	p.Met701Val	0.965517	701		0		chr1:214813782	ENST00000366955
CENPF	rs3795523	MODERATE	NON_SYNONYMOUS_CODING	chr1	214813941	C	G	p.Gln754Glu	1	773		0		chr1:214813941	ENST00000366955
CENPF	rs3795522	MODERATE	NON_SYNONYMOUS_CODING	chr1	214814125	G	A	p.Arg815His	1	436		0		chr1:214814125	ENST00000366955
CENPF	rs3795519	MODERATE	NON_SYNONYMOUS_CODING	chr1	214814733	T	G	p.Tyr1018Asp	1	394		0		chr1:214814733	ENST00000366955
CENPF	rs61732031	MODERATE	NON_SYNONYMOUS_CODING	chr1	214814925	C	T	p.His1082Tyr	0.590909	150		0		chr1:214814925	ENST00000366955
CENPF	rs3795517	MODERATE	NON_SYNONYMOUS_CODING	chr1	214815916	T	C	p.Leu1412Ser	1	386		0		chr1:214815916	ENST00000366955
CENPF	rs2666839	MODERATE	NON_SYNONYMOUS_CODING	chr1	214816224	G	A	p.Ala1515Thr	1	1215		0		chr1:214816224	ENST00000366955
CENPF	rs3795514	MODERATE	NON_SYNONYMOUS_CODING	chr1	214816297	A	G	p.Lys1539Arg	0.576923	172		0		chr1:214816297	ENST00000366955
CENPF	rs3748692	MODERATE	NON_SYNONYMOUS_CODING	chr1	214818215	G	A	p.Asp1768Asn	1	738		0		chr1:214818215	ENST00000366955
CENPF	rs3748693	MODERATE	NON_SYNONYMOUS_CODING	chr1	214818223	T	A	p.His1770Gln	1	648		0		chr1:214818223	ENST00000366955
CENPF	rs61732022	MODERATE	NON_SYNONYMOUS_CODING	chr1	214818548	C	T	p.Arg1879Cys	0.381579	200		0		chr1:214818548	ENST00000366955
CENPF	rs3790646	MODERATE	NON_SYNONYMOUS_CODING	chr1	214818846	A	G	p.Asp1978Gly	1	648		0		chr1:214818846	ENST00000366955
CENPF	rs3790647	MODERATE	NON_SYNONYMOUS_CODING	chr1	214818945	A	C	p.Glu2011Ala	1	827		0		chr1:214818945	ENST00000366955
CENPF	rs7533166	MODERATE	NON_SYNONYMOUS_CODING	chr1	214819044	C	T	p.Ser2044Leu	0.447059	276		0		chr1:214819044	ENST00000366955
CENPF	rs3748695	MODERATE	NON_SYNONYMOUS_CODING	chr1	214819328	G	A	p.Ala2139Thr	1	929		0		chr1:214819328	ENST00000366955
CENPF	rs12058704	MODERATE	NON_SYNONYMOUS_CODING	chr1	214819587	A	G	p.Gln2225Arg	1	839		0		chr1:214819587	ENST00000366955
CENPF	rs3748696	MODERATE	NON_SYNONYMOUS_CODING	chr1	214819980	C	T	p.Ala2356Val	1	834		0		chr1:214819980	ENST00000366955
CENPF	rs335524	MODERATE	NON_SYNONYMOUS_CODING	chr1	214826196	G	A	p.Arg2729Gln	0.44186	172		0		chr1:214826196	ENST00000366955
CENPF	rs438034	MODERATE	NON_SYNONYMOUS_CODING	chr1	214830617	A	G	p.Arg2943Gly	0.993056	1686		0		chr1:214830617	ENST00000366955
CENPF	rs7289	MODERATE	NON_SYNONYMOUS_CODING	chr1	214837110	C	G	p.Asn3106Lys	1	646		0		chr1:214837110	ENST00000366955
USH2A	rs10864198	MODERATE	NON_SYNONYMOUS_CODING	chr1	215960167	T	G	p.Glu3411Ala	0.531646	316		0		chr1:215960167	ENST00000366943
USH2A	rs10864219	MODERATE	NON_SYNONYMOUS_CODING	chr1	216172380	A	G	p.Ile2169Thr	1	770		0		chr1:216172380	ENST00000366943
USH2A	rs1805049	MODERATE	NON_SYNONYMOUS_CODING	chr1	216348764	C	T	p.Arg1486Lys	1	882		0		chr1:216348764	ENST00000366943
USH2A	rs10779261	MODERATE	NON_SYNONYMOUS_CODING	chr1	216595306	C	T	p.Ala125Thr	0.991304	1373		0		chr1:216595306	ENST00000366943
NBPF3	rs12034222	MODERATE	NON_SYNONYMOUS_CODING	chr1	21806710	T	G	p.Leu459Val	0.5	52		0		chr1:21806710	ENST00000318249
LYPLAL1	rs940570	MODERATE	NON_SYNONYMOUS_CODING	chr1	219383905	A	G	p.Ile131Met	1	1060		0		chr1:219383905	ENST00000366928
RAP1GAP	rs2275363	MODERATE	NON_SYNONYMOUS_CODING	chr1	21940555	C	T	p.Ala171Thr	0.954545	480		0		chr1:21940555	ENST00000359708
EPRS	rs2230301	MODERATE	NON_SYNONYMOUS_CODING	chr1	220197625	G	T	p.Asp308Glu	1	208		0		chr1:220197625	ENST00000366923
USP48	rs2275668	MODERATE	NON_SYNONYMOUS_CODING	chr1	22050649	C	A	p.Val3Leu	1	556		0		chr1:22050649	ENST00000374732
2014-03-01	rs2642438	MODERATE	NON_SYNONYMOUS_CODING	chr1	220970028	A	G	p.Thr165Ala	1	392		0		chr1:220970028	ENST00000366910
HSPG2	rs897471	MODERATE	NON_SYNONYMOUS_CODING	chr1	22191454	G	A	p.Ala1503Val	0.983871	720		0		chr1:22191454	ENST00000374695
HSPG2	rs989994	MODERATE	NON_SYNONYMOUS_CODING	chr1	22206649	T	C	p.Asn765Ser	1	1889		0		chr1:22206649	ENST00000374695
HSPG2	rs1874792	MODERATE	NON_SYNONYMOUS_CODING	chr1	22207235	T	C	p.Met638Val	1	996		0		chr1:22207235	ENST00000374695
HHIPL2	rs3748666	MODERATE	NON_SYNONYMOUS_CODING	chr1	222713631	G	C	p.His391Asp	0.541667	149		0		chr1:222713631	ENST00000343410
MIA3	rs2936053	MODERATE	NON_SYNONYMOUS_CODING	chr1	222802006	A	G	p.Lys482Glu	1	457		0		chr1:222802006	ENST00000344922
MIA3	rs2936051	MODERATE	NON_SYNONYMOUS_CODING	chr1	222803204	A	G	p.Glu881Gly	0.619048	250		0		chr1:222803204	ENST00000344922		Extracellular
AIDA	rs3811465	MODERATE	NON_SYNONYMOUS_CODING	chr1	222886119	A	G	p.Ile2Thr	0.362069	144		0		chr1:222886119	ENST00000541237
CELA3B	rs7528405	MODERATE	NON_SYNONYMOUS_CODING	chr1	22307538	C	T	p.Arg79Trp	1	438		0		chr1:22307538	ENST00000337107
DISP1	rs2609383	MODERATE	NON_SYNONYMOUS_CODING	chr1	223116472	G	A	p.Glu103Lys	0.36	38		0		chr1:223116472	ENST00000360254
DISP1	rs2789975	MODERATE	NON_SYNONYMOUS_CODING	chr1	223116474	G	T	p.Glu103Asp	0.37931	51		0		chr1:223116474	ENST00000360254
TLR5	rs7512943	MODERATE	NON_SYNONYMOUS_CODING	chr1	223283910	A	G	p.Phe822Leu	1	1083		0		chr1:223283910	ENST00000540964
TLR5	rs5744174	MODERATE	NON_SYNONYMOUS_CODING	chr1	223284528	A	G	p.Phe616Leu	0.561538	561		0		chr1:223284528	ENST00000540964
CELA3A	rs3820285	MODERATE	NON_SYNONYMOUS_CODING	chr1	22336277	C	G	p.Ala241Gly	0.987952	968		0		chr1:22336277	ENST00000290122
CAPN8	rs4072247	MODERATE	NON_SYNONYMOUS_CODING	chr1	223716508	C	T	p.Glu662Lys	0.513514	201		0		chr1:223716508	ENST00000366872
CAPN8	rs61823553	MODERATE	NON_SYNONYMOUS_CODING	chr1	223718651	G	A	p.Thr570Met	0.545455	219		0		chr1:223718651	ENST00000366872
CAPN8	rs34606532	HIGH	STOP_GAINED	chr1	223722780	G	A	p.Arg538*	0.45977	291		0		chr1:223722780	ENST00000366872
CAPN8	rs35539373	MODERATE	NON_SYNONYMOUS_CODING	chr1	223813586	G	T	p.Ser245Tyr	1	651		0		chr1:223813586	ENST00000419193
CAPN2	rs25655	MODERATE	NON_SYNONYMOUS_CODING	chr1	223900408	C	G	p.Asp22Glu	1	559		0		chr1:223900408	ENST00000295006
DNAH14	rs41267347	MODERATE	NON_SYNONYMOUS_CODING	chr1	225142710	A	T	p.Thr43Ser	0.435897	329		0		chr1:225142710	ENST00000439375
DNAH14	rs75568712	MODERATE	NON_SYNONYMOUS_CODING	chr1	225211422	T	C	p.Phe424Leu	0.471264	307		0		chr1:225211422	ENST00000445597
DNAH14	rs3105559	MODERATE	NON_SYNONYMOUS_CODING	chr1	225266966	C	G	p.Leu828Val	0.993377	1840		0		chr1:225266966	ENST00000439375
DNAH14	rs3128651	MODERATE	NON_SYNONYMOUS_CODING	chr1	225268343	A	G	p.Lys944Arg	0.983871	724		0		chr1:225268343	ENST00000445597
DNAH14	rs3128652	MODERATE	NON_SYNONYMOUS_CODING	chr1	225268346	G	A	p.Arg945Gln	0.981818	649		0		chr1:225268346	ENST00000445597
DNAH14	rs3128655	MODERATE	NON_SYNONYMOUS_CODING	chr1	225270409	A	T	p.Asn1099Tyr	0.45098	289		0		chr1:225270409	ENST00000439375
DNAH14	rs3128658	MODERATE	NON_SYNONYMOUS_CODING	chr1	225273248	G	T	p.Met1110Ile	1	444		0		chr1:225273248	ENST00000439375
DNAH14		HIGH	FRAME_SHIFT	chr1	225380561	CAAAG	C	c.4553*>-AAAG	0.4	1297		0		chr1:225380561	ENST00000445597
DNAH14	rs76767146	MODERATE	NON_SYNONYMOUS_CODING	chr1	225452983	A	G	p.Asn2435Ser	0.43038	251		0		chr1:225452983	ENST00000439375
DNAH14	rs112172758	MODERATE	NON_SYNONYMOUS_CODING	chr1	225495168	G	A	p.Arg2911His	0.428571	346		0		chr1:225495168	ENST00000439375
DNAH14	rs41268715	MODERATE	NON_SYNONYMOUS_CODING	chr1	225521101	G	C	p.Glu3232Gln	0.396694	288		0		chr1:225521101	ENST00000439375
DNAH14	rs3856145	MODERATE	NON_SYNONYMOUS_CODING	chr1	225528183	C	A	p.Asp3393Glu	0.590164	331		0		chr1:225528183	ENST00000439375
DNAH14	rs6667999	MODERATE	NON_SYNONYMOUS_CODING	chr1	225533684	A	G	p.Lys3474Glu	0.567568	171		0		chr1:225533684	ENST00000439375
DNAH14	rs17522489	MODERATE	NON_SYNONYMOUS_CODING	chr1	225533931	A	G	p.Gln3556Arg	0.431034	205		0		chr1:225533931	ENST00000439375
DNAH14	rs7527925	MODERATE	NON_SYNONYMOUS_CODING	chr1	225534219	T	C	p.Val3627Ala	0.561151	612		0		chr1:225534219	ENST00000439375
DNAH14	rs7535953	MODERATE	NON_SYNONYMOUS_CODING	chr1	225534348	G	A	p.Arg3670Lys	0.531915	229		0		chr1:225534348	ENST00000439375
DNAH14	rs3856154	MODERATE	NON_SYNONYMOUS_CODING	chr1	225565015	T	C	p.Leu4096Pro	0.414634	141		0		chr1:225565015	ENST00000439375
DNAH14	rs950210	MODERATE	NON_SYNONYMOUS_CODING	chr1	225569241	T	G	p.Phe4244Cys	0.531646	347		0		chr1:225569241	ENST00000439375
DNAH14	rs61738690	MODERATE	NON_SYNONYMOUS_CODING	chr1	225580093	G	C	p.Lys4375Asn	0.534483	276		0		chr1:225580093	ENST00000439375
LBR	rs2230419	MODERATE	NON_SYNONYMOUS_CODING	chr1	225607144	C	T	p.Ser154Asn	0.473684	402		0		chr1:225607144	ENST00000338179
EPHX1	rs1051740	MODERATE	NON_SYNONYMOUS_CODING	chr1	226019633	T	C	p.Tyr113His	0.503448	455		0		chr1:226019633	ENST00000448202
TMEM63A	rs45492299	MODERATE	NON_SYNONYMOUS_CODING	chr1	226054333	G	A	p.Leu206Phe	0.529412	298		0		chr1:226054333	ENST00000366835		Transmembrane_region
PARP1	rs1805407	MODERATE	NON_SYNONYMOUS_CODING	chr1	226589833	T	C	p.Lys123Arg	0.605263	222		0		chr1:226589833	ENST00000366790
CDC42BPA	rs2802269	MODERATE	NON_SYNONYMOUS_CODING	chr1	227182033	G	A	p.Ala1761Val	1	211		0		chr1:227182033	ENST00000334218
JMJD4	rs2295994	MODERATE	NON_SYNONYMOUS_CODING	chr1	227922918	A	C	p.Asp65Glu	0.272727	66		0		chr1:227922918	ENST00000438896
JMJD4	rs7419238	MODERATE	NON_SYNONYMOUS_CODING	chr1	227923081	G	A	p.Ala11Val	1	373		0		chr1:227923081	ENST00000438896
SNAP47	rs2236359	MODERATE	NON_SYNONYMOUS_CODING	chr1	227935444	A	G	p.Arg48Gly	0.461538	135		0		chr1:227935444	ENST00000366759
SNAP47	rs149727487	MODERATE	NON_SYNONYMOUS_CODING	chr1	227935835	T	A	p.Leu178Gln	0.363636	97		0		chr1:227935835	ENST00000366759
PRSS38	rs9426581	MODERATE	NON_SYNONYMOUS_CODING	chr1	228033197	A	G	p.Met204Val	1	541		0		chr1:228033197	ENST00000366757
C1orf35	rs61825155	MODERATE	NON_SYNONYMOUS_CODING	chr1	228290033	T	C	p.Lys142Arg	0.603774	265		0		chr1:228290033	ENST00000272139
IBA57	rs55873785	MODERATE	NON_SYNONYMOUS_CODING	chr1	228353651	G	C	p.Gly45Ala	0.565217	137		0		chr1:228353651	ENST00000366711
ZBTB40	rs209729	MODERATE	NON_SYNONYMOUS_CODING	chr1	22835677	A	G	p.Tyr595Cys	0.985507	1613		0		chr1:22835677	ENST00000404138
OBSCN	rs1771487	MODERATE	NON_SYNONYMOUS_CODING	chr1	228402121	A	G	p.Gln502Arg	0.444444	261		0		chr1:228402121	ENST00000570156
OBSCN	rs1757153	MODERATE	NON_SYNONYMOUS_CODING	chr1	228412228	G	A	p.Ala908Thr	0.472222	124		0		chr1:228412228	ENST00000422127
OBSCN	rs7532342	MODERATE	NON_SYNONYMOUS_CODING	chr1	228444565	T	A	p.Val1600Asp	1	603		0		chr1:228444565	ENST00000570156
OBSCN	rs1188724	MODERATE	NON_SYNONYMOUS_CODING	chr1	228461129	A	G	p.His2048Arg	1	954		0		chr1:228461129	ENST00000570156
OBSCN	rs1188722	MODERATE	NON_SYNONYMOUS_CODING	chr1	228464276	T	C	p.Phe2491Leu	1	551		0		chr1:228464276	ENST00000570156
OBSCN	rs493945	MODERATE	NON_SYNONYMOUS_CODING	chr1	228465346	A	G	p.Asn2674Asp	0.4375	134		0		chr1:228465346	ENST00000570156
ZBTB40	rs209720	MODERATE	NON_SYNONYMOUS_CODING	chr1	22846709	G	A	p.Val997Met	1	919		0		chr1:22846709	ENST00000404138
OBSCN	rs3795783	MODERATE	NON_SYNONYMOUS_CODING	chr1	228467711	G	A	p.Arg2958Gln	0.457143	232		0		chr1:228467711	ENST00000570156
OBSCN	rs3795785	MODERATE	NON_SYNONYMOUS_CODING	chr1	228469870	C	T	p.Arg3241Trp	0.590909	143		0		chr1:228469870	ENST00000570156
OBSCN	rs3795789	MODERATE	NON_SYNONYMOUS_CODING	chr1	228476366	G	T	p.Glu491Asp	0.38806	149		0		chr1:228476366	ENST00000366709
OBSCN	rs3795790	MODERATE	NON_SYNONYMOUS_CODING	chr1	228476367	A	T	p.Ser492Cys	0.433333	171		0		chr1:228476367	ENST00000366709
OBSCN	rs41270183	MODERATE	NON_SYNONYMOUS_CODING	chr1	228492220	C	T	p.Ser4740Leu	0.403846	167		0		chr1:228492220	ENST00000570156
OBSCN	rs55704206	MODERATE	NON_SYNONYMOUS_CODING	chr1	228496066	G	T	p.Ala5198Ser	0.571429	105		0		chr1:228496066	ENST00000570156
OBSCN	rs61825301	MODERATE	NON_SYNONYMOUS_CODING	chr1	228504591	C	A	p.His5446Gln	0.46	188		0		chr1:228504591	ENST00000570156
OBSCN	rs4653942	MODERATE	NON_SYNONYMOUS_CODING	chr1	228505204	G	A	p.Arg5491His	1	531		0		chr1:228505204	ENST00000570156
OBSCN	rs1188729	MODERATE	NON_SYNONYMOUS_CODING	chr1	228505668	C	G	p.Ser5599Cys	1	1237		0		chr1:228505668	ENST00000570156
OBSCN	rs3795800	MODERATE	NON_SYNONYMOUS_CODING	chr1	228505727	C	T	p.Arg5619Cys	0.404255	208		0		chr1:228505727	ENST00000570156
OBSCN	rs3795801	MODERATE	NON_SYNONYMOUS_CODING	chr1	228505739	G	A	p.Gly5623Ser	0.530612	379		0		chr1:228505739	ENST00000570156
OBSCN	rs373610	MODERATE	NON_SYNONYMOUS_CODING	chr1	228509427	A	G	p.Asp5919Gly	0.972973	437		0		chr1:228509427	ENST00000570156
OBSCN	rs10158354	MODERATE	NON_SYNONYMOUS_CODING	chr1	228548197	G	A	p.Arg6535His	0.48	124		0		chr1:228548197	ENST00000284548
OBSCN	rs35155240	MODERATE	NON_SYNONYMOUS_CODING	chr1	228550426	C	T	p.Pro7228Ser	0.515152	165		0		chr1:228550426	ENST00000570156
OBSCN	rs56174824	MODERATE	NON_SYNONYMOUS_CODING	chr1	228564884	G	A	p.Arg8681His	0.4	144		0		chr1:228564884	ENST00000570156
TMEM78		HIGH	FRAME_SHIFT	chr1	229385669	TTC	T	c.228*>-TC	0.428571	245		0		chr1:229385669	ENST00000323223
ABCB10	rs115488729	MODERATE	NON_SYNONYMOUS_CODING	chr1	229654053	T	C	p.Asn697Ser	0.5125	327		0		chr1:229654053	ENST00000344517		ABC_transporter
TAF5L	rs55655740	MODERATE	NON_SYNONYMOUS_CODING	chr1	229738193	C	T	p.Val241Ile	0.525	187		0		chr1:229738193	ENST00000366676
URB2	rs3811473	MODERATE	NON_SYNONYMOUS_CODING	chr1	229772693	T	G	p.Val778Gly	0.425926	194		0		chr1:229772693	ENST00000258243
CAPN9	rs1933631	MODERATE	NON_SYNONYMOUS_CODING	chr1	230914729	A	C	p.Lys322Gln	0.565217	136		0		chr1:230914729	ENST00000271971		Calpain_catalytic
CAPN9	rs12731961	MODERATE	NON_SYNONYMOUS_CODING	chr1	230923313	C	T	p.Arg522Trp	0.5	174		0		chr1:230923313	ENST00000271971
GNPAT	rs11558492	MODERATE	NON_SYNONYMOUS_CODING	chr1	231408091	A	G	p.Asp519Gly	0.551515	661		0		chr1:231408091	ENST00000366647
EXOC8	rs75215445	MODERATE	NON_SYNONYMOUS_CODING	chr1	231471673	C	G	p.Asp607His	0.483871	166		0		chr1:231471673	ENST00000360394
SPRTN	rs2437150	MODERATE	NON_SYNONYMOUS_CODING	chr1	231488524	C	T	p.Pro296Leu	0.42623	204		0		chr1:231488524	ENST00000295050
DISC1	rs3738401	MODERATE	NON_SYNONYMOUS_CODING	chr1	231830295	G	A	p.Arg264Gln	1	472		0		chr1:231830295	ENST00000602281
PCNXL2	rs1033325	MODERATE	NON_SYNONYMOUS_CODING	chr1	233398713	C	T	p.Arg117Lys	0.533333	180		0		chr1:233398713	ENST00000258229
LUZP1	rs10799790	MODERATE	NON_SYNONYMOUS_CODING	chr1	23418153	C	T	p.Asp868Asn	1	483		0		chr1:23418153	ENST00000418342
LUZP1	rs3765407	MODERATE	NON_SYNONYMOUS_CODING	chr1	23419374	G	T	p.Gln461Lys	1	344		0		chr1:23419374	ENST00000418342
LUZP1	rs477830	MODERATE	NON_SYNONYMOUS_CODING	chr1	23419383	C	T	p.Gly458Ser	1	311		0		chr1:23419383	ENST00000418342
COA6	rs10910420	MODERATE	NON_SYNONYMOUS_CODING	chr1	234509259	G	C	p.Ser16Thr	0.55	133		0		chr1:234509259	ENST00000366615
TARBP1	rs111283864	MODERATE	NON_SYNONYMOUS_CODING	chr1	234565176	C	T	p.Val953Met	0.5	101		0		chr1:234565176	ENST00000040877
TARBP1	rs4920246	MODERATE	NON_SYNONYMOUS_CODING	chr1	234582651	T	C	p.Ser678Gly	0.465909	296		0		chr1:234582651	ENST00000040877
TARBP1	rs139816698	MODERATE	NON_SYNONYMOUS_CODING	chr1	234582720	C	T	p.Gly655Arg	0.378641	250		0		chr1:234582720	ENST00000040877
IRF2BP2	rs11502	MODERATE	NON_SYNONYMOUS_CODING	chr1	234744480	G	A	p.Ala254Val	0.571429	106		0		chr1:234744480	ENST00000366610
NID1	rs10733133	MODERATE	NON_SYNONYMOUS_CODING	chr1	236208773	C	T	p.Val246Ile	0.488889	205		0		chr1:236208773	ENST00000366595		NIDO
ERO1LB	rs1055851	MODERATE	NON_SYNONYMOUS_CODING	chr1	236381825	G	C	p.His465Gln	0.568627	467		0		chr1:236381825	ENST00000354619
ERO1LB	rs2477599	MODERATE	NON_SYNONYMOUS_CODING	chr1	236413230	T	A	p.Asp129Val	0.426667	239		0		chr1:236413230	ENST00000354619
LGALS8	rs2243525	MODERATE	NON_SYNONYMOUS_CODING	chr1	236706862	G	C	p.Arg226Ser	1	1817		0		chr1:236706862	ENST00000527974
HEATR1	rs2275687	MODERATE	NON_SYNONYMOUS_CODING	chr1	236717926	T	C	p.Glu2017Gly	1	1255		0		chr1:236717926	ENST00000366582
HEATR1	rs1885533	MODERATE	NON_SYNONYMOUS_CODING	chr1	236719193	A	G	p.Val1854Ala	1	846		0		chr1:236719193	ENST00000366582
HEATR1	rs2275689	MODERATE	NON_SYNONYMOUS_CODING	chr1	236721660	T	C	p.Asn1694Ser	1	1642		0		chr1:236721660	ENST00000366582
HEATR1	rs115054974	MODERATE	NON_SYNONYMOUS_CODING	chr1	236722318	T	C	p.Asn1630Asp	0.736842	174		0		chr1:236722318	ENST00000366582
HEATR1	rs2794763	MODERATE	NON_SYNONYMOUS_CODING	chr1	236749649	T	C	p.Met607Val	0.981982	1287		0		chr1:236749649	ENST00000366582
HEATR1	rs2794751	MODERATE	NON_SYNONYMOUS_CODING	chr1	236758887	T	C	p.His348Arg	1	820		0		chr1:236758887	ENST00000366582
TCEA3	rs192746462	MODERATE	NON_SYNONYMOUS_CODING	chr1	23743859	T	C	p.Glu88Gly	0.255319	65		0		chr1:23743859	ENST00000450454
RYR2	rs34967813	MODERATE	NON_SYNONYMOUS_CODING	chr1	237841390	A	G	p.Gln2958Arg	0.5625	261		0		chr1:237841390	ENST00000366574		Cytoplasmic
ID3	rs11574	MODERATE	NON_SYNONYMOUS_CODING	chr1	23885498	T	C	p.Thr105Ala	1	917		0		chr1:23885498	ENST00000374561
FMN2	rs114291166	MODERATE	NON_SYNONYMOUS_CODING	chr1	240370702	A	G	p.Thr864Ala	0.303571	107		0		chr1:240370702	ENST00000319653
FMN2	rs3795677	MODERATE	NON_SYNONYMOUS_CODING	chr1	240492734	G	A	p.Arg64His	0.414634	147		0		chr1:240492734	ENST00000545751
TCEB3	rs2235541	MODERATE	NON_SYNONYMOUS_CODING	chr1	24077451	C	T	p.Thr145Met	0.848485	299		0		chr1:24077451	ENST00000418390
TCEB3	rs141832703	MODERATE	NON_SYNONYMOUS_CODING	chr1	24077853	G	A	p.Arg279His	0.333333	96		0		chr1:24077853	ENST00000418390
WDR64	rs56327926	MODERATE	NON_SYNONYMOUS_CODING	chr1	241886645	G	C	p.Lys357Asn	0.461538	236		0		chr1:241886645	ENST00000437684
EXO1	rs4149909	MODERATE	NON_SYNONYMOUS_CODING	chr1	242023898	A	G	p.Asn279Ser	0.446043	386		0		chr1:242023898	ENST00000518483
EXO1	rs735943	MODERATE	NON_SYNONYMOUS_CODING	chr1	242030151	A	G	p.His354Arg	0.467626	442		0		chr1:242030151	ENST00000518483
EXO1	rs1776148	MODERATE	NON_SYNONYMOUS_CODING	chr1	242042545	A	G	p.Glu670Gly	1	200		0		chr1:242042545	ENST00000518483
EXO1	rs1635498	MODERATE	NON_SYNONYMOUS_CODING	chr1	242045275	C	T	p.Arg723Cys	1	1114		0		chr1:242045275	ENST00000518483
CEP170	rs144272877	MODERATE	NON_SYNONYMOUS_CODING	chr1	243354791	C	T	p.Gly213Ser	1	109		0		chr1:243354791	ENST00000366544
PLCH2	rs12736998	MODERATE	NON_SYNONYMOUS_CODING	chr1	2433900	C	T	p.Pro977Leu	0.275	62		0		chr1:2433900	ENST00000449969
SDCCAG8	rs2275155	MODERATE	NON_SYNONYMOUS_CODING	chr1	243493907	A	T	p.Glu378Asp	0.469565	325		0		chr1:243493907	ENST00000366541
PLCH2	rs200322093	MODERATE	NON_SYNONYMOUS_CODING	chr1	2435451	C	T	p.Pro981Leu	0.454545	148		0		chr1:2435451	ENST00000378488
MYOM3	rs4393101	MODERATE	NON_SYNONYMOUS_CODING	chr1	24416059	T	C	p.Asp529Gly	1	331		0		chr1:24416059	ENST00000330966
MYOM3	rs4233050	MODERATE	NON_SYNONYMOUS_CODING	chr1	24419496	A	G	p.Met345Thr	0.377778	122		0		chr1:24419496	ENST00000330966
PANK4	rs7535528	MODERATE	NON_SYNONYMOUS_CODING	chr1	2444414	G	A	p.Ala547Val	0.347826	95		0		chr1:2444414	ENST00000378466
EFCAB2	rs7545078	MODERATE	NON_SYNONYMOUS_CODING	chr1	245133489	T	G	p.Val22Gly	0.391304	101		0		chr1:245133489	ENST00000366522
EFCAB2	rs7542813	MODERATE	NON_SYNONYMOUS_CODING	chr1	245133539	A	G	p.Thr39Ala	1	251		0		chr1:245133539	ENST00000366522
EFCAB2		HIGH	FRAME_SHIFT	chr1	245133549	GGC	G	c.125*>-GC	0.333333	209		0		chr1:245133549	ENST00000366522
EFCAB2		HIGH	FRAME_SHIFT	chr1	245133623	T	TCCTCC	p.X67X	0.333333	283		0		chr1:245133623	ENST00000366522
EFCAB2	rs61844237	MODERATE	NON_SYNONYMOUS_CODING	chr1	245133662	G	C	p.Gly80Arg	0.441176	134		0		chr1:245133662	ENST00000366522
SMYD3	rs7520453	MODERATE	NON_SYNONYMOUS_CODING	chr1	246670481	C	G	p.Lys13Asn	0.529412	103		0		chr1:246670481	ENST00000403792
CNST	rs6702823	MODERATE	NON_SYNONYMOUS_CODING	chr1	246755124	T	C	p.Leu87Ser	1	364		0		chr1:246755124	ENST00000366513
AHCTF1	rs12410563	MODERATE	NON_SYNONYMOUS_CODING	chr1	247006051	G	C	p.Leu2220Val	0.482759	243		0		chr1:247006051	ENST00000366508		Necessary_for_nuclear_localization
AHCTF1	rs2642990	MODERATE	NON_SYNONYMOUS_CODING	chr1	247048834	T	C	p.Asn909Ser	0.35	82		0		chr1:247048834	ENST00000366508		Necessary_for_cytoplasmic_localization
STPG1	rs1142057	MODERATE	NON_SYNONYMOUS_CODING	chr1	24706292	T	C	p.Ile58Val	0.7	284		0		chr1:24706292	ENST00000440416
STPG1	rs11538189	MODERATE	NON_SYNONYMOUS_CODING	chr1	24710405	A	G	p.Met93Thr	0.727273	516		0		chr1:24710405	ENST00000374409
ZNF695	rs2642973	MODERATE	NON_SYNONYMOUS_CODING	chr1	247162658	C	T	p.Arg84Lys	1	859		0		chr1:247162658	ENST00000487338		KRAB
OR2B11	rs4925663	MODERATE	NON_SYNONYMOUS_CODING	chr1	247614617	C	T	p.Gly223Asp	1	585		0		chr1:247614617	ENST00000318749		Transmembrane_region
OR2B11	rs6695302	MODERATE	NON_SYNONYMOUS_CODING	chr1	247614693	C	T	p.Val198Met	1	662		0		chr1:247614693	ENST00000318749		Extracellular
OR2C3	rs6702693	MODERATE	NON_SYNONYMOUS_CODING	chr1	247694949	G	C	p.Leu289Val	1	648		0		chr1:247694949	ENST00000366487		Transmembrane_region
OR2C3	rs6657127	MODERATE	NON_SYNONYMOUS_CODING	chr1	247695612	G	A	p.Pro68Ser	1	882		0		chr1:247695612	ENST00000366487		Transmembrane_region
OR2G2	rs12737801	MODERATE	NON_SYNONYMOUS_CODING	chr1	247751731	C	G	p.Pro24Ala	0.625	226		0		chr1:247751731	ENST00000320065		Extracellular
OR2G2	rs869111	MODERATE	NON_SYNONYMOUS_CODING	chr1	247752367	A	G	p.Arg236Gly	0.37931	109		0		chr1:247752367	ENST00000320065		Cytoplasmic
OR13G1	rs28446289	MODERATE	NON_SYNONYMOUS_CODING	chr1	247835674	G	A	p.Arg224Cys	0.4	159		0		chr1:247835674	ENST00000359688		Cytoplasmic
OR13G1	rs28556931	MODERATE	NON_SYNONYMOUS_CODING	chr1	247835908	T	A	p.Met146Leu	0.511111	212		0		chr1:247835908	ENST00000359688
OR13G1	rs28711149	MODERATE	NON_SYNONYMOUS_CODING	chr1	247836207	T	A	p.Lys46Ile	0.529412	253		0		chr1:247836207	ENST00000359688		Cytoplasmic
OR14A2	rs36075193	MODERATE	NON_SYNONYMOUS_CODING	chr1	247886949	T	C	p.Ile133Val	1	501		0		chr1:247886949	ENST00000366485
OR14A16	rs6695283	MODERATE	NON_SYNONYMOUS_CODING	chr1	247978319	A	G	p.Ile238Thr	1	549		0		chr1:247978319	ENST00000357627		Transmembrane_region
OR14A16		MODERATE	CODON_CHANGE_PLUS_CODON_DELETION	chr1	247978541	AAGG	A	p.X163Leu	1	2000		0		chr1:247978541	ENST00000357627
OR11L1	rs10888256	MODERATE	NON_SYNONYMOUS_CODING	chr1	248004775	C	T	p.Ala142Thr	1	659		0		chr1:248004775	ENST00000355784
OR11L1	rs4607924	MODERATE	NON_SYNONYMOUS_CODING	chr1	248004848	G	C	p.Phe117Leu	1	380		0		chr1:248004848	ENST00000355784
OR11L1	rs10888257	MODERATE	NON_SYNONYMOUS_CODING	chr1	248004877	C	T	p.Gly108Ser	1	532		0		chr1:248004877	ENST00000355784
OR2W3	rs10888267	MODERATE	NON_SYNONYMOUS_CODING	chr1	248059423	C	T	p.Arg179Cys	0.5625	121		0		chr1:248059423	ENST00000537741
OR2W3	rs12135078	MODERATE	NON_SYNONYMOUS_CODING	chr1	248059456	G	A	p.Val190Ile	0.571429	87		0		chr1:248059456	ENST00000537741
OR2W3	rs12139390	MODERATE	NON_SYNONYMOUS_CODING	chr1	248059476	A	C	p.Glu196Asp	1	203		0		chr1:248059476	ENST00000537741
OR2W3	rs11204545	MODERATE	NON_SYNONYMOUS_CODING	chr1	248059703	T	A	p.Met272Lys	0.557692	220		0		chr1:248059703	ENST00000537741
OR2W3	rs11204546	MODERATE	NON_SYNONYMOUS_CODING	chr1	248059712	T	C	p.Met275Thr	0.520833	177		0		chr1:248059712	ENST00000537741
OR2T8	rs11204563	MODERATE	NON_SYNONYMOUS_CODING	chr1	248084434	G	A	p.Gly39Ser	0.44	92		0		chr1:248084434	ENST00000319968		Transmembrane_region
OR2T8	rs61857492	MODERATE	NON_SYNONYMOUS_CODING	chr1	248084825	C	T	p.Ala169Val	0.344828	84		0		chr1:248084825	ENST00000319968
OR2T8	rs4590708	MODERATE	NON_SYNONYMOUS_CODING	chr1	248085124	G	A	p.Asp269Asn	0.898305	536		0		chr1:248085124	ENST00000319968		Extracellular
OR2L8	rs4925583	MODERATE	NON_SYNONYMOUS_CODING	chr1	248112809	A	G	p.Tyr217Cys	1	740		0		chr1:248112809	ENST00000357191		Transmembrane_region
OR2L8	rs4925792	MODERATE	NON_SYNONYMOUS_CODING	chr1	248112836	A	G	p.His226Arg	1	578		0		chr1:248112836	ENST00000357191		Cytoplasmic
OR2L8	rs10888281	HIGH	STOP_GAINED	chr1	248113026	T	A	p.Tyr289*	1	277		0		chr1:248113026	ENST00000357191		Transmembrane_region
OR2L8	rs10888282	MODERATE	NON_SYNONYMOUS_CODING	chr1	248113040	A	G	p.Lys294Arg	1	215		0		chr1:248113040	ENST00000357191		Cytoplasmic
OR2AK2	rs4478844	MODERATE	NON_SYNONYMOUS_CODING	chr1	248129240	G	A	p.Val203Met	0.516129	174		0		chr1:248129240	ENST00000366480
OR2M2	rs4916104	MODERATE	NON_SYNONYMOUS_CODING	chr1	248343990	T	C	p.Cys235Arg	0.297297	119		0		chr1:248343990	ENST00000359682		Cytoplasmic
OR2T33	rs10888338	MODERATE	NON_SYNONYMOUS_CODING	chr1	248436611	G	A	p.Ala169Val	0.935484	308		0		chr1:248436611	ENST00000318021
OR2T12	rs6667171	MODERATE	NON_SYNONYMOUS_CODING	chr1	248457979	C	A	p.Arg301Leu	1	213		0		chr1:248457979	ENST00000317996		Cytoplasmic
OR2T12	rs12137982	MODERATE	NON_SYNONYMOUS_CODING	chr1	248458571	T	A	p.Thr104Ser	1	335		0		chr1:248458571	ENST00000317996
OR2T12	rs6678138	MODERATE	NON_SYNONYMOUS_CODING	chr1	248458676	T	C	p.Met69Val	1	196		0		chr1:248458676	ENST00000317996		Transmembrane_region
OR2M7	rs4916129	MODERATE	NON_SYNONYMOUS_CODING	chr1	248487300	C	T	p.Asp191Asn	1	1150		0		chr1:248487300	ENST00000317965		Extracellular
OR2M7	rs4916130	MODERATE	NON_SYNONYMOUS_CODING	chr1	248487338	C	A	p.Cys178Phe	1	1051		0		chr1:248487338	ENST00000317965
OR2M7	rs7555310	MODERATE	NON_SYNONYMOUS_CODING	chr1	248487638	A	G	p.Val78Ala	0.98	612		0		chr1:248487638	ENST00000317965		Transmembrane_region
OR2M7	rs7555424	MODERATE	NON_SYNONYMOUS_CODING	chr1	248487768	A	G	p.Phe35Leu	1	700		0		chr1:248487768	ENST00000317965		Transmembrane_region
OR2T6	rs6587467	MODERATE	NON_SYNONYMOUS_CODING	chr1	248550976	T	G	p.Cys23Gly	1	659		0		chr1:248550976	ENST00000355728		Extracellular
OR2T1	rs28599722	MODERATE	NON_SYNONYMOUS_CODING	chr1	248569369	A	G	p.His25Arg	0.965517	658		0		chr1:248569369	ENST00000366474		Extracellular
OR2T29	rs2105243	MODERATE	NON_SYNONYMOUS_CODING	chr1	248722659	C	T	p.Gly45Glu	0.7	225		0		chr1:248722659	ENST00000328570		Transmembrane_region
OR2T29	rs77589892	MODERATE	NON_SYNONYMOUS_CODING	chr1	248722777	T	A	p.Arg6Trp	0.533333	319		0		chr1:248722777	ENST00000328570		Extracellular
OR2T11	rs1892442	MODERATE	NON_SYNONYMOUS_CODING	chr1	248789504	T	C	p.Gln309Arg	1	183		0		chr1:248789504	ENST00000330803		Cytoplasmic
OR2T11	rs1892443	MODERATE	NON_SYNONYMOUS_CODING	chr1	248790075	A	G	p.Cys119Arg	1	411		0		chr1:248790075	ENST00000330803
OR2T11	rs34397542	MODERATE	NON_SYNONYMOUS_CODING	chr1	248790167	A	G	p.Ile88Thr	0.328947	139		0		chr1:248790167	ENST00000330803		Extracellular
OR2T27	rs77685347	MODERATE	NON_SYNONYMOUS_CODING	chr1	248813542	G	A	p.Ser215Leu	0.84058	573		0		chr1:248813542	ENST00000344889		Transmembrane_region
OR2T27		MODERATE	CODON_CHANGE_PLUS_CODON_DELETION	chr1	248813650	CAGA	C	p.X178Cys	0.826087	939		0		chr1:248813650	ENST00000344889
OR2T27	rs71642467	MODERATE	NON_SYNONYMOUS_CODING	chr1	248813723	C	T	p.Asp155Asn	0.484375	173		0		chr1:248813723	ENST00000344889
OR2T27	rs1782242	MODERATE	NON_SYNONYMOUS_CODING	chr1	248814080	A	C	p.Leu36Val	1	574		0		chr1:248814080	ENST00000344889		Transmembrane_region
TNFRSF14	rs4870	MODERATE	NON_SYNONYMOUS_CODING	chr1	2488153	A	G	p.Lys17Arg	0.772727	201		0		chr1:2488153	ENST00000409119
OR14I1	rs2000390	MODERATE	NON_SYNONYMOUS_CODING	chr1	248845097	C	T	p.Ser170Asn	1	868		0		chr1:248845097	ENST00000342623
OR14I1	rs4509608	MODERATE	NON_SYNONYMOUS_CODING	chr1	248845458	C	T	p.Asp50Asn	1	350		0		chr1:248845458	ENST00000342623		Cytoplasmic
OR14I1	rs4462184	MODERATE	NON_SYNONYMOUS_CODING	chr1	248845499	A	G	p.Val36Ala	1	304		0		chr1:248845499	ENST00000342623		Transmembrane_region
MMEL1	rs3748816	MODERATE	NON_SYNONYMOUS_CODING	chr1	2526746	A	G	p.Met518Thr	0.705882	250		0		chr1:2526746	ENST00000378412
C1orf63	rs1043879	MODERATE	NON_SYNONYMOUS_CODING	chr1	25570081	T	C	p.Glu240Gly	0.714286	517		0		chr1:25570081	ENST00000417642
SEPN1	rs7349185	MODERATE	NON_SYNONYMOUS_CODING	chr1	26131654	G	A	p.Cys108Tyr	1	1416		0		chr1:26131654	ENST00000374315
SEPN1	rs2294228	MODERATE	NON_SYNONYMOUS_CODING	chr1	26140573	C	A	p.Asn468Lys	1	1111		0		chr1:26140573	ENST00000374315
AUNIP	rs34449716	MODERATE	NON_SYNONYMOUS_CODING	chr1	26162313	T	G	p.Lys82Thr	0.777778	238		0		chr1:26162313	ENST00000538789
FAM110D	rs3748856	MODERATE	NON_SYNONYMOUS_CODING	chr1	26487940	A	G	p.His53Arg	0.76	206		0		chr1:26487940	ENST00000374268
CATSPER4	rs17257155	MODERATE	NON_SYNONYMOUS_CODING	chr1	26526439	A	G	p.Ile293Val	0.263158	72		0		chr1:26526439	ENST00000456354		Transmembrane_region
CEP85	rs3795686	MODERATE	NON_SYNONYMOUS_CODING	chr1	26582091	G	A	p.Ser213Asn	0.773196	655		0		chr1:26582091	ENST00000252992
UBXN11	rs4332350	MODERATE	NON_SYNONYMOUS_CODING	chr1	26610891	A	C	p.Leu69Arg	1	407		0		chr1:26610891	ENST00000374223
AIM1L	rs10751735	MODERATE	NON_SYNONYMOUS_CODING	chr1	26663362	C	T	p.Ser420Asn	0.351351	110		0		chr1:26663362	ENST00000527815
ZNF683	rs11247933	MODERATE	NON_SYNONYMOUS_CODING	chr1	26691174	C	A	p.Arg288Leu	0.681818	290		0		chr1:26691174	ENST00000436292
RPS6KA1	rs2229712	MODERATE	NON_SYNONYMOUS_CODING	chr1	26883511	A	C	p.Lys344Thr	0.583333	258		0		chr1:26883511	ENST00000531382
GPN2	rs3170660	MODERATE	NON_SYNONYMOUS_CODING	chr1	27210721	T	C	p.Arg85Gly	0.27027	81		0		chr1:27210721	ENST00000374133
MAP3K6	rs1138294	MODERATE	NON_SYNONYMOUS_CODING	chr1	27688633	G	A	p.Thr455Ile	0.606061	210		0		chr1:27688633	ENST00000493901
THEMIS2	rs3766400	MODERATE	NON_SYNONYMOUS_CODING	chr1	28209366	A	G	p.Lys511Glu	1	1009		0		chr1:28209366	ENST00000373921
SMPDL3B	rs3813803	MODERATE	NON_SYNONYMOUS_CODING	chr1	28282292	T	C	p.Val263Ala	0.222222	39		0		chr1:28282292	ENST00000373894
OPRD1	rs1042114	MODERATE	NON_SYNONYMOUS_CODING	chr1	29138975	G	T	p.Cys27Phe	0.973684	450		0		chr1:29138975	ENST00000234961		Extracellular
ACTRT2	rs3795263	MODERATE	NON_SYNONYMOUS_CODING	chr1	2938989	G	A	p.Gly247Arg	1	285		0		chr1:2938989	ENST00000378404
SRSF4	rs2230678	MODERATE	NON_SYNONYMOUS_CODING	chr1	29475341	C	T	p.Gly356Ser	0.307692	75		0		chr1:29475341	ENST00000373795
SRSF4	rs2230677	MODERATE	NON_SYNONYMOUS_CODING	chr1	29475394	C	G	p.Gly338Ala	0.333333	69		0		chr1:29475394	ENST00000373795
SRSF4	rs2230679	MODERATE	NON_SYNONYMOUS_CODING	chr1	29475648	T	G	p.Glu253Asp	0.271845	84		0		chr1:29475648	ENST00000373795
MECR	rs148978800	MODERATE	NON_SYNONYMOUS_CODING	chr1	29527028	G	A	p.Ala277Val	0.785714	239		0		chr1:29527028	ENST00000263702
SPOCD1	rs199967531	MODERATE	NON_SYNONYMOUS_CODING	chr1	32279845	G	T	p.Leu364Met	0.612903	205		0		chr1:32279845	ENST00000533231
TMEM39B	rs744455	MODERATE	NON_SYNONYMOUS_CODING	chr1	32557486	A	G	p.Thr216Ala	0.318681	132		0		chr1:32557486	ENST00000456834
IQCC	rs3903683	MODERATE	NON_SYNONYMOUS_CODING	chr1	32672908	T	G	p.Phe289Cys	0.238095	55		0		chr1:32672908	ENST00000537469
ZBTB8A	rs704886	MODERATE	NON_SYNONYMOUS_CODING	chr1	33065947	G	C	p.Gly418Ala	1	702		0		chr1:33065947	ENST00000373510
SYNC	rs360042	MODERATE	NON_SYNONYMOUS_CODING	chr1	33160878	C	T	p.Arg274Gln	1	1073		0		chr1:33160878	ENST00000409190
SYNC	rs360041	MODERATE	NON_SYNONYMOUS_CODING	chr1	33161212	T	C	p.Met163Val	0.984375	776		0		chr1:33161212	ENST00000409190		Rod
PRDM16	rs870124	MODERATE	NON_SYNONYMOUS_CODING	chr1	3328358	T	C	p.Ser534Pro	1	432		0		chr1:3328358	ENST00000514189
ARHGEF16	rs2185639	MODERATE	NON_SYNONYMOUS_CODING	chr1	3389727	C	T	p.His82Tyr	1	502		0		chr1:3389727	ENST00000378373
ZSCAN20	rs4403594	MODERATE	NON_SYNONYMOUS_CODING	chr1	33957152	T	G	p.Tyr432Asp	1	508		0		chr1:33957152	ENST00000361328
MEGF6	rs7553399	MODERATE	NON_SYNONYMOUS_CODING	chr1	3416449	C	A	p.Arg916Leu	1	421		0		chr1:3416449	ENST00000356575
CSMD2	rs10737374	MODERATE	NON_SYNONYMOUS_CODING	chr1	34270498	G	A	p.Ala40Val	1	408		0		chr1:34270498	ENST00000338325
HMGB4	rs10379	MODERATE	NON_SYNONYMOUS_CODING	chr1	34330067	A	C	p.Glu92Ala	1	894		0		chr1:34330067	ENST00000522796
MEGF6	rs7513275	MODERATE	NON_SYNONYMOUS_CODING	chr1	3511934	A	G	p.Met115Thr	1	423		0		chr1:3511934	ENST00000356575
GJA4	rs41266431	MODERATE	NON_SYNONYMOUS_CODING	chr1	35260202	G	A	p.Val130Ile	0.837209	339		0		chr1:35260202	ENST00000342280		Cytoplasmic
GJA4	rs1764391	MODERATE	NON_SYNONYMOUS_CODING	chr1	35260769	C	T	p.Pro319Ser	0.5	149		0		chr1:35260769	ENST00000342280		Cytoplasmic
ZMYM1	rs2971408	MODERATE	NON_SYNONYMOUS_CODING	chr1	35562965	G	A	p.Val73Met	1	183		0		chr1:35562965	ENST00000373330
CCDC27	rs10910021	MODERATE	NON_SYNONYMOUS_CODING	chr1	3669205	C	G	p.Gln54Glu	0.743802	749		0		chr1:3669205	ENST00000294600
THRAP3	rs6425977	MODERATE	NON_SYNONYMOUS_CODING	chr1	36752433	C	T	p.Ala201Val	1	460		0		chr1:36752433	ENST00000469141
CCDC27	rs1181883	MODERATE	NON_SYNONYMOUS_CODING	chr1	3677933	T	C	p.Met267Thr	0.8	372		0		chr1:3677933	ENST00000294600
GRIK3	rs6691840	MODERATE	NON_SYNONYMOUS_CODING	chr1	37325477	A	C	p.Ser310Ala	0.608696	176		0		chr1:37325477	ENST00000373093
CEP104	rs10797347	MODERATE	NON_SYNONYMOUS_CODING	chr1	3759784	A	G	p.Phe224Leu	1	366		0		chr1:3759784	ENST00000378223
DNALI1	rs11749	MODERATE	NON_SYNONYMOUS_CODING	chr1	38023316	C	T	p.Ala87Val	0.274809	88		0		chr1:38023316	ENST00000296218
C1orf174	rs4274008	MODERATE	NON_SYNONYMOUS_CODING	chr1	3807593	G	C	p.Thr53Arg	1	405		0		chr1:3807593	ENST00000361605
EPHA10	rs4653328	MODERATE	NON_SYNONYMOUS_CODING	chr1	38227086	A	T	p.Phe281Ile	0.555556	192		0		chr1:38227086	ENST00000427468
INPP5B	rs41311191	MODERATE	NON_SYNONYMOUS_CODING	chr1	38329999	C	G	p.Asp951His	0.22	44		0		chr1:38329999	ENST00000373026
INPP5B	rs11488569	MODERATE	NON_SYNONYMOUS_CODING	chr1	38338795	A	G	p.Met745Thr	1	849		0		chr1:38338795	ENST00000373026		ASH
INPP5B	rs41307896	MODERATE	NON_SYNONYMOUS_CODING	chr1	38348506	G	A	p.Leu169Phe	0.246154	76		0		chr1:38348506	ENST00000458109
INPP5B	rs34655914	MODERATE	NON_SYNONYMOUS_CODING	chr1	38397341	G	A	p.Ser259Leu	0.464286	142		0		chr1:38397341	ENST00000373021
INPP5B	rs35267671	MODERATE	NON_SYNONYMOUS_CODING	chr1	38397369	C	T	p.Gly6Ser	0.428571	112		0		chr1:38397369	ENST00000373027
MACF1	rs2490948	MODERATE	NON_SYNONYMOUS_CODING	chr1	39717566	T	C	p.Cys141Arg	1	354		0		chr1:39717566	ENST00000567887
MACF1	rs16826069	MODERATE	NON_SYNONYMOUS_CODING	chr1	39797055	A	G	p.Ile39Val	0.690476	282		0		chr1:39797055	ENST00000289893
MACF1	rs41270807	MODERATE	NON_SYNONYMOUS_CODING	chr1	39801815	A	C	p.Lys3222Asn	0.590164	330		0		chr1:39801815	ENST00000567887
MACF1	rs2296172	MODERATE	NON_SYNONYMOUS_CODING	chr1	39835817	A	G	p.Met4389Val	0.512195	214		0		chr1:39835817	ENST00000567887
MACF1	rs587404	MODERATE	NON_SYNONYMOUS_CODING	chr1	39908506	G	A	p.Ala6446Thr	0.755906	822		0		chr1:39908506	ENST00000567887
MACF1	rs668556	MODERATE	NON_SYNONYMOUS_CODING	chr1	39914363	G	C	p.Ser6766Thr	1	1151		0		chr1:39914363	ENST00000567887
BMP8A	rs4660269	MODERATE	NON_SYNONYMOUS_CODING	chr1	39957913	A	G	p.Met84Val	1	229		0		chr1:39957913	ENST00000331593
HEYL	rs784625	MODERATE	NON_SYNONYMOUS_CODING	chr1	40098328	T	C	p.His47Arg	1	422		0		chr1:40098328	ENST00000372852		bHLH
PPIE	rs2463260	MODERATE	NON_SYNONYMOUS_CODING	chr1	40229368	A	G	p.Glu282Gly	0.736842	145		0		chr1:40229368	ENST00000356511
BMP8B	rs179472	MODERATE	NON_SYNONYMOUS_CODING	chr1	40230336	C	G	p.Ser301Thr	0.321101	120		0		chr1:40230336	ENST00000397360
MYCL1	rs3134614	MODERATE	NON_SYNONYMOUS_CODING	chr1	40363054	G	C	p.Thr392Ser	1	165		0		chr1:40363054	ENST00000397332
CAP1	rs11207440	MODERATE	NON_SYNONYMOUS_CODING	chr1	40533266	T	G	p.Cys229Gly	1	349		0		chr1:40533266	ENST00000372805
CAP1	rs6665944	MODERATE	NON_SYNONYMOUS_CODING	chr1	40533347	T	G	p.Ser256Ala	1	686		0		chr1:40533347	ENST00000372805
ZFP69B	rs2272994	MODERATE	NON_SYNONYMOUS_CODING	chr1	40923019	G	A	p.Cys13Tyr	0.22093	52		0		chr1:40923019	ENST00000361584
SLFNL1	rs147062455	MODERATE	NON_SYNONYMOUS_CODING	chr1	41482917	A	G	p.Trp364Arg	0.5	103		0		chr1:41482917	ENST00000439569
HIVEP3	rs2483689	MODERATE	NON_SYNONYMOUS_CODING	chr1	41978825	C	G	p.Ala2023Pro	1	538		0		chr1:41978825	ENST00000429157
HIVEP3	rs2810566	MODERATE	NON_SYNONYMOUS_CODING	chr1	42048745	T	C	p.His575Arg	1	802		0		chr1:42048745	ENST00000429157
GUCA2A	rs2071499	MODERATE	NON_SYNONYMOUS_CODING	chr1	42630364	G	A	p.Ser7Phe	1	634		0		chr1:42630364	ENST00000357001
FOXJ3	rs343376	MODERATE	NON_SYNONYMOUS_CODING	chr1	42693597	A	G	p.Val162Ala	1	1079		0		chr1:42693597	ENST00000545068
ZMYND12	rs1034268	MODERATE	NON_SYNONYMOUS_CODING	chr1	42898843	A	G	p.Phe316Leu	1	1282		0		chr1:42898843	ENST00000372565
CLDN19	rs4660658	MODERATE	NON_SYNONYMOUS_CODING	chr1	43201534	G	A	p.Arg186Cys	0.72549	329		0		chr1:43201534	ENST00000539749
KDM4A	rs586339	MODERATE	NON_SYNONYMOUS_CODING	chr1	44137257	C	A	p.Ala482Glu	0.833333	324		0		chr1:44137257	ENST00000372396
ST3GAL3	rs37458	MODERATE	NON_SYNONYMOUS_CODING	chr1	44290530	A	G	p.Thr97Ala	0.294643	134		0		chr1:44290530	ENST00000372372
ARTN	rs2242637	MODERATE	NON_SYNONYMOUS_CODING	chr1	44401384	A	G	p.Gln19Arg	1	545		0		chr1:44401384	ENST00000498139
SLC6A9	rs149105213	MODERATE	NON_SYNONYMOUS_CODING	chr1	44467259	C	T	p.Val408Ile	0.227273	46		0		chr1:44467259	ENST00000360584		Transmembrane_region
KLF17	rs2429051	MODERATE	NON_SYNONYMOUS_CODING	chr1	44595113	G	C	p.Ser57Thr	1	357		0		chr1:44595113	ENST00000372299
ERI3	rs161721	MODERATE	NON_SYNONYMOUS_CODING	chr1	44788398	A	T	p.Met48Lys	1	366		0		chr1:44788398	ENST00000372259
PTCH2	rs11573586	MODERATE	NON_SYNONYMOUS_CODING	chr1	45293709	G	A	p.His622Tyr	0.654545	322		0		chr1:45293709	ENST00000447098		Cytoplasmic
MUTYH	rs138089183	MODERATE	NON_SYNONYMOUS_CODING	chr1	45797846	G	A	p.Arg309Cys	0.384	273		0		chr1:45797846	ENST00000450313
AKR1A1	rs2229540	MODERATE	NON_SYNONYMOUS_CODING	chr1	46032311	A	G	p.Asn52Ser	0.686567	410		0		chr1:46032311	ENST00000372070
CCDC17	rs3014246	MODERATE	NON_SYNONYMOUS_CODING	chr1	46086077	C	T	p.Ser68Asn	1	242		0		chr1:46086077	ENST00000445048
CCDC17	rs3014242	MODERATE	NON_SYNONYMOUS_CODING	chr1	46087577	G	A	p.Pro353Leu	1	330		0		chr1:46087577	ENST00000528266
MAST2	rs1052610	MODERATE	NON_SYNONYMOUS_CODING	chr1	46500993	A	G	p.Asp1551Gly	0.236364	60		0		chr1:46500993	ENST00000361297
PIK3R3	rs785467	MODERATE	NON_SYNONYMOUS_CODING	chr1	46521559	A	T	p.Asn329Lys	1	803		0		chr1:46521559	ENST00000540385
POMGNT1	rs6659553	MODERATE	NON_SYNONYMOUS_CODING	chr1	46655158	T	C	p.Met623Val	1	1655		0		chr1:46655158	ENST00000371992
POMGNT1	rs2292487	MODERATE	NON_SYNONYMOUS_CODING	chr1	46660295	T	C	p.Asn188Ser	0.741379	748		0		chr1:46660295	ENST00000396420
MKNK1	rs1258021	MODERATE	NON_SYNONYMOUS_CODING	chr1	47059934	T	C	p.Gln32Arg	1	453		0		chr1:47059934	ENST00000532110
MOB3C	rs6671527	HIGH	STOP_GAINED	chr1	47080679	G	A	p.Arg24*	0.723404	337		0		chr1:47080679	ENST00000271139
CYP4B1	rs2297810	MODERATE	NON_SYNONYMOUS_CODING	chr1	47280859	G	A	p.Met332Ile	0.62963	185		0		chr1:47280859	ENST00000371923
CYP4B1	rs2297809	MODERATE	NON_SYNONYMOUS_CODING	chr1	47282772	C	T	p.Arg376Cys	0.727273	256		0		chr1:47282772	ENST00000371923
CYP4A22	rs2056899	MODERATE	NON_SYNONYMOUS_CODING	chr1	47607851	A	T	p.Asn152Tyr	0.416667	141		0		chr1:47607851	ENST00000371891
CYP4A22	rs10789501	MODERATE	NON_SYNONYMOUS_CODING	chr1	47609489	T	C	p.Cys231Arg	0.75	348		0		chr1:47609489	ENST00000371891
STIL	rs13376679	MODERATE	NON_SYNONYMOUS_CODING	chr1	47726087	T	C	p.His985Arg	0.241611	49		0		chr1:47726087	ENST00000371877
STIL	rs3125630	MODERATE	NON_SYNONYMOUS_CODING	chr1	47767914	G	A	p.Ala86Val	1	1481		0		chr1:47767914	ENST00000396221
FOXD2		MODERATE	CODON_INSERTION	chr1	47904668	T	TCCGCAC	p.X288X	1	974		0		chr1:47904668	ENST00000334793
SLC5A9	rs212991	MODERATE	NON_SYNONYMOUS_CODING	chr1	48697733	T	G	p.Ile294Met	1	539		0		chr1:48697733	ENST00000236495		Extracellular
ELAVL4	rs2494876	MODERATE	NON_SYNONYMOUS_CODING	chr1	50666515	C	T	p.Pro275Ser	1	306		0		chr1:50666515	ENST00000371821
PODN	rs1288386	MODERATE	NON_SYNONYMOUS_CODING	chr1	53535478	G	A	p.Arg32His	0.75	443		0		chr1:53535478	ENST00000395871
PODN	rs1288389	MODERATE	NON_SYNONYMOUS_CODING	chr1	53544597	T	C	p.Val520Ala	1	414		0		chr1:53544597	ENST00000312553
CYB5RL	rs946448	MODERATE	NON_SYNONYMOUS_CODING	chr1	54661150	C	T	p.Arg47Lys	0.654545	331		0		chr1:54661150	ENST00000542737
MRPL37	rs13571	MODERATE	NON_SYNONYMOUS_CODING	chr1	54681920	G	C	p.Cys366Ser	1	1495		0		chr1:54681920	ENST00000360840
FAM151A	rs1368883	MODERATE	NON_SYNONYMOUS_CODING	chr1	55075452	G	A	p.Ala416Val	0.654321	419		0		chr1:55075452	ENST00000302250
MROH7	rs1655518	MODERATE	NON_SYNONYMOUS_CODING	chr1	55119546	A	G	p.Glu316Gly	1	688		0		chr1:55119546	ENST00000421030
MROH7	rs570218	MODERATE	NON_SYNONYMOUS_CODING	chr1	55139741	A	G	p.His618Arg	1	615		0		chr1:55139741	ENST00000421030
TTC4	rs1147990	MODERATE	NON_SYNONYMOUS_CODING	chr1	55182300	T	A	p.Ser58Thr	1	697		0		chr1:55182300	ENST00000371284
C1orf177	rs600499	MODERATE	NON_SYNONYMOUS_CODING	chr1	55277599	T	C	p.Tyr205His	1	539		0		chr1:55277599	ENST00000371273
TMEM61	rs3737832	MODERATE	NON_SYNONYMOUS_CODING	chr1	55451872	G	A	p.Glu40Lys	0.641026	251		0		chr1:55451872	ENST00000371268
PCSK9	rs540796	MODERATE	NON_SYNONYMOUS_CODING	chr1	55524197	A	G	p.Tyr243Cys	1	1145		0		chr1:55524197	ENST00000543384
PCSK9	rs562556	MODERATE	NON_SYNONYMOUS_CODING	chr1	55524237	G	A	p.Val474Ile	1	1282		0		chr1:55524237	ENST00000302118
PCSK9	rs505151	MODERATE	NON_SYNONYMOUS_CODING	chr1	55529187	G	A	p.Gly670Glu	1	780		0		chr1:55529187	ENST00000302118
USP24	rs487230	MODERATE	NON_SYNONYMOUS_CODING	chr1	55541174	A	G	p.Val2468Ala	1	1118		0		chr1:55541174	ENST00000294383
USP24	rs1165222	MODERATE	NON_SYNONYMOUS_CODING	chr1	55638075	G	A	p.Thr226Ile	1	590		0		chr1:55638075	ENST00000294383
C8A	rs1620075	MODERATE	NON_SYNONYMOUS_CODING	chr1	57378149	G	T	p.Arg485Leu	0.25	42		0		chr1:57378149	ENST00000361249		MACPF
C8B	rs1013579	MODERATE	NON_SYNONYMOUS_CODING	chr1	57422484	C	T	p.Gly65Arg	1	1556		0		chr1:57422484	ENST00000543257
RP4-592A1.2		HIGH	SPLICE_SITE_ACCEPTOR	chr1	59096779	G	GA		0.346457	3070		0		chr1:59096779	ENST00000330659
MYSM1	rs12139511	MODERATE	NON_SYNONYMOUS_CODING	chr1	59147926	T	C	p.Thr264Ala	0.621212	365		0		chr1:59147926	ENST00000472487
NPHP4	rs1287637	HIGH	SPLICE_SITE_ACCEPTOR	chr1	5935162	A	T		1	389		0		chr1:5935162	ENST00000378169
NPHP4	rs34248917	MODERATE	NON_SYNONYMOUS_CODING	chr1	5951013	C	T	p.Arg740His	0.684211	259		0		chr1:5951013	ENST00000378156
KCNAB2	rs2311802	MODERATE	NON_SYNONYMOUS_CODING	chr1	6157434	C	T	p.Pro344Leu	0.683333	382		0		chr1:6157434	ENST00000602612
KCNAB2	rs182856833	MODERATE	NON_SYNONYMOUS_CODING	chr1	6157475	T	C	p.Cys358Arg	0.759259	394		0		chr1:6157475	ENST00000602612
CHD5	rs2843493	MODERATE	NON_SYNONYMOUS_CODING	chr1	6184092	A	G	p.Ser396Pro	1	568		0		chr1:6184092	ENST00000378021
INADL	rs2799627	MODERATE	NON_SYNONYMOUS_CODING	chr1	62330080	T	G	p.Ile870Met	1	1208		0		chr1:62330080	ENST00000371158
INADL	rs1134767	MODERATE	NON_SYNONYMOUS_CODING	chr1	62456014	G	A	p.Arg66His	0.772727	346		0		chr1:62456014	ENST00000543708
KANK4	rs2941679	MODERATE	NON_SYNONYMOUS_CODING	chr1	62713224	C	G	p.Val935Leu	1	523		0		chr1:62713224	ENST00000371153
KANK4	rs2666472	MODERATE	NON_SYNONYMOUS_CODING	chr1	62728784	A	G	p.Val840Ala	1	851		0		chr1:62728784	ENST00000371153
KANK4	rs2258470	MODERATE	NON_SYNONYMOUS_CODING	chr1	62728838	T	C	p.His822Arg	1	540		0		chr1:62728838	ENST00000371153
GPR153	rs12735670	MODERATE	NON_SYNONYMOUS_CODING	chr1	6313938	C	T	p.Arg209His	1	298		0		chr1:6313938	ENST00000377893		Cytoplasmic
ALG6	rs4630153	MODERATE	NON_SYNONYMOUS_CODING	chr1	63881552	C	T	p.Ser306Phe	0.460317	237		0		chr1:63881552	ENST00000263440
PGM1	rs855314	MODERATE	NON_SYNONYMOUS_CODING	chr1	64095111	A	G	p.Ile88Val	0.987342	965		0		chr1:64095111	ENST00000371084
PGM1	rs1126728	MODERATE	NON_SYNONYMOUS_CODING	chr1	64097432	C	T	p.Arg24Cys	0.382353	236		0		chr1:64097432	ENST00000540265
ROR1	rs7527017	MODERATE	NON_SYNONYMOUS_CODING	chr1	64643277	C	T	p.Thr518Met	0.395349	150		0		chr1:64643277	ENST00000371079		Protein_kinase
CACHD1	rs6588100	MODERATE	NON_SYNONYMOUS_CODING	chr1	65113568	T	C	p.Met414Thr	1	804		0		chr1:65113568	ENST00000371073		VWFA
PLEKHG5	rs61741379	MODERATE	NON_SYNONYMOUS_CODING	chr1	6533393	G	C	p.Thr317Ser	0.265625	76		0		chr1:6533393	ENST00000537245
LEPR	rs1137100	MODERATE	NON_SYNONYMOUS_CODING	chr1	66036441	A	G	p.Lys109Arg	0.444444	71		0		chr1:66036441	ENST00000371060		Extracellular
LEPR	rs1137101	MODERATE	NON_SYNONYMOUS_CODING	chr1	66058513	A	G	p.Gln223Arg	0.577982	514		0		chr1:66058513	ENST00000371060		Extracellular
DNAJC11	rs200454	MODERATE	NON_SYNONYMOUS_CODING	chr1	6705874	G	C	p.Thr290Ser	0.466667	93		0		chr1:6705874	ENST00000377577
TCTEX1D1	rs2133173	MODERATE	NON_SYNONYMOUS_CODING	chr1	67243024	C	A	p.Leu143Ile	0.979167	1127		0		chr1:67243024	ENST00000282670
INSL5	rs549148	MODERATE	NON_SYNONYMOUS_CODING	chr1	67266756	T	A	p.Gln50Leu	1	302		0		chr1:67266756	ENST00000304526		Interchain__between_B_and_A_chains_
WDR78	rs482082	MODERATE	NON_SYNONYMOUS_CODING	chr1	67288045	C	T	p.Arg832Gln	1	241		0		chr1:67288045	ENST00000371026
SLC35D1	rs10157422	MODERATE	NON_SYNONYMOUS_CODING	chr1	67518534	C	T	p.Ala82Thr	0.446809	184		0		chr1:67518534	ENST00000235345		Transmembrane_region
[truncated: 6,374 more rows]

## Sheet: Unique
Sample	GeneName	dbSNP	Effect	Effect2	Chr	Position	Ref	Alt	MAF	Qscore	ActionLevel	Mutation	CosmicOverlaps	CosmicMutations	CosmicIDs	Transcript	Domain	Coordinate
Pos	RFXANK		MODERATE	NON_SYNONYMOUS_CODING	chr19	19307841	C	T	0.147727	38		p.Pro86Leu	0			ENST00000540981		chr19:19307841
Neg	AHNAK2	rs201377363	MODERATE	NON_SYNONYMOUS_CODING	chr14	105412363	T	C	0.0821918	38		p.Lys3142Arg	1	p.K3142R	COSM1132977	ENST00000333244		chr14:105412363
Neg	HOXD8		MODERATE	CODON_DELETION	chr2	176995145	TGCG	T	0.304348	33		p.Ala18X	0			ENST00000548663		chr2:176995145
Pos	MYLIP	rs9370867	MODERATE	NON_SYNONYMOUS_CODING	chr6	16145325	A	G	0.125	38		p.Asn342Ser	0			ENST00000356840		chr6:16145325
Pos	ZNF217		MODERATE	NON_SYNONYMOUS_CODING	chr20	52198744	C	A	0.0537634	41		p.Ala208Ser	0			ENST00000371471		chr20:52198744
Neg	TBPL2		MODERATE	NON_SYNONYMOUS_CODING	chr14	55903438	C	A	0.0754717	31		p.Ser150Ile	0			ENST00000247219		chr14:55903438
