# Supplementary material for: Enhancer Remodeling during Adaptive Bypass to MEK Inhibition Is Attenuated by Pharmacologic Targeting of the P-TEFb Complex
Source: Oxford University Press journal article supplement (doi:10.1158/2159-8290.cd-16-0653), 2017-01-21
Supplement: 21598290cd160653-sup-167758_3_supp_3815483_wjwvwn.xlsx [file 21598290cd160653-sup-167758_3_supp_3815483_wjwvwn.xlsx]

## Sheet: JON_PROJ01_R2_chip_rna_merge01
stitched BRD4 peak	gene	gene tss/strand	peak to gene tss distance	SUM159 BRD4 ChIP (rpm) 24 h 100 nM trametinib	SUM159 BRD4 ChIP (rpm) 24 h 100 nM trametinib + 300 nM JQ1	SUM159 BRD4 ChIP (rpm) 24 h 300 nM JQ1	SUM159 BRD4 ChIP (rpm) DMSO	SUM159 RSEM 24 h 100 nM trametinib	SUM159 RSEM 24 h 100 nM trametinib + 300 nM JQ1	SUM159 RSEM 24 h 300 nM JQ1	SUM159 RSEM 24 h DMSO
chr10:52134390-52179100	SGMS1	chr10:52193315/-	14215	28.33	25.76	11.98	14.02	1341.14	1659.01	1061.99	695.422
chr13:103373865-103378124	CCDC168	chr13:103411421/-	33297	2.31	2.43	0.45	0.07	0	0	0	0
chr13:103373865-103378124	KDELC1	chr13:103451403/-	73279	2.31	2.43	0.45	0.07	403.66	506.005	519.462	501.28
chr13:103373865-103378124	TPP2	chr13:103249285/+	124580	2.31	2.43	0.45	0.07	1659.67	1724.28	1748.2	1835.85
chr13:103373865-103378124	TEX30	chr13:103421890/-	43766	2.31	2.43	0.45	0.07	0	0	0	0
chr13:103373865-103378124	ERCC5	chr13:103498190/+	-120066	2.31	2.43	0.45	0.07	1476.06	1071.77	724.613	906.671
chr13:103373865-103378124	METTL21C	chr13:103346870/-	-26995	2.31	2.43	0.45	0.07	0	0	0	0
chr13:103373865-103378124	BIVM	chr13:103451398/+	-73274	2.31	2.43	0.45	0.07	696.014	335.024	399.366	601.095
chr13:103373865-103378124	BIVM-ERCC5	chr13:103459495/+	-81371	2.31	2.43	0.45	0.07	0	0	0	0
chr6:109034823-109042911	FOXO3	chr6:108882288/+	152535	2.55	3.68	1.21	0.35	5205.29	6395.82	2748.2	1989.41
chr6:109034823-109042911	ARMC2	chr6:109169618/+	-126707	2.55	3.68	1.21	0.35	105.446	84.5953	48.0538	44.5
chr22:36538168-36557001	RBFOX2	chr22:36424584/-	-113584	45.96	19.01	1.53	1.98	0	0	0	0
chr22:36538168-36557001	MYH9	chr22:36745299/-	188298	45.96	19.01	1.53	1.98	56633.8	67391.1	46201.8	34621
chr22:36538168-36557001	APOL4	chr22:36597933/-	40932	45.96	19.01	1.53	1.98	20.8695	3.6554	0	0.4363
chr22:36538168-36557001	APOL3	chr22:36556836/-	0	45.96	19.01	1.53	1.98	166.956	67.3629	3.3638	16.1422
chr22:36538168-36557001	APOL2	chr22:36629286/-	72285	45.96	19.01	1.53	1.98	1965.94	931.368	551.98	535.283
chr22:36538168-36557001	APOL1	chr22:36649116/+	-92115	45.96	19.01	1.53	1.98	413.732	95.7859	23.7049	65.4674
chr14:102605211-102606678	MOK	chr14:102771536/-	164858	0.89	1.36	1.07	0.77	0	0	0	0
chr14:102605211-102606678	HSP90AA1	chr14:102606085/-	0	0.89	1.36	1.07	0.77	20156.6	40942.6	81887.1	52921.9
chr14:102605211-102606678	ZNF839	chr14:102783713/+	-177035	0.89	1.36	1.07	0.77	173.244	161.541	147.958	206.197
chr14:102605211-102606678	WDR20	chr14:102606188/+	0	0.89	1.36	1.07	0.77	338.855	343.081	369.534	335.059
chr14:102605211-102606678	DYNC1H1	chr14:102430864/+	174347	0.89	1.36	1.07	0.77	11974.7	16981.7	16189.8	9630.77
chr19:56110130-56118274	U2AF2	chr19:56165415/+	-47141	8.42	4.14	3.2	6.63	3152.39	3839.16	5375.3	5729.16
chr19:56110130-56118274	ZNF628	chr19:55991200/+	118930	8.42	4.14	3.2	6.63	151.029	169.713	162.422	182.799
chr19:56110130-56118274	ISOC2	chr19:55973048/-	-137082	8.42	4.14	3.2	6.63	419.587	183.812	192.215	345.966
chr19:56110130-56118274	CCDC106	chr19:56158953/+	-40679	8.42	4.14	3.2	6.63	383.889	149.869	119.174	305.392
chr19:56110130-56118274	EPN1	chr19:56186560/+	-68286	8.42	4.14	3.2	6.63	2830.01	3630.29	3427.68	2571.4
chr19:56110130-56118274	SSC5D	chr19:55999869/+	110261	8.42	4.14	3.2	6.63	40.0914	12.0104	1.9222	2.6176
chr19:56110130-56118274	NLRP9	chr19:56249767/-	131493	8.42	4.14	3.2	6.63	2.746	1.5666	2.8832	3.9265
chr19:56110130-56118274	ZNF784	chr19:56135940/-	17666	8.42	4.14	3.2	6.63	69.748	77.2846	42.2874	67.1863
chr19:56110130-56118274	ZNF581	chr19:56154985/+	-36711	8.42	4.14	3.2	6.63	362.47	327.937	218.164	252.603
chr19:56110130-56118274	ZNF580	chr19:56152391/+	-34117	8.42	4.14	3.2	6.63	682.652	680.418	553.58	472.922
chr19:56110130-56118274	ZNF524	chr19:56111705/+	0	8.42	4.14	3.2	6.63	147.734	87.2063	54.7814	98.5981
chr19:56110130-56118274	FIZ1	chr19:56110892/-	0	8.42	4.14	3.2	6.63	269.656	240.731	209.515	269.182
chr19:56110130-56118274	RFPL4A	chr19:56270506/+	-152232	8.42	4.14	3.2	6.63	1.0984	9.3995	0.4805	1.3088
chr19:56110130-56118274	SBK2	chr19:56048434/-	-61696	8.42	4.14	3.2	6.63	1.6476	1.5666	0	0
chr19:56110130-56118274	ZNF579	chr19:56092210/-	-17920	8.42	4.14	3.2	6.63	421.783	327.415	243.152	325.461
chr19:56110130-56118274	UBE2S	chr19:55919324/-	-190806	8.42	4.14	3.2	6.63	1053.91	1181.72	3620.37	4354.9
chr19:56110130-56118274	NAT14	chr19:55997027/+	113103	8.42	4.14	3.2	6.63	368.511	179.635	140.798	185.417
chr19:56110130-56118274	ZNF865	chr19:56124958/+	-6684	8.42	4.14	3.2	6.63	0	0	0	0
chr3:101567407-101570368	NFKBIZ	chr3:101568357/+	0	4.99	4.42	2.65	2.53	199.688	168.193	130.966	100.483
chr3:101567407-101570368	RPL24	chr3:101405562/-	-161845	4.99	4.42	2.65	2.53	3101.32	3281.46	3155.69	3808.68
chr3:101567407-101570368	ZBTB11	chr3:101395987/-	-171420	4.99	4.42	2.65	2.53	990.334	1432.17	1453.32	1143.97
chr3:101567407-101570368	NXPE3	chr3:101504245/+	63162	4.99	4.42	2.65	2.53	0	0	0	0
chr3:101567407-101570368	CEP97	chr3:101443436/+	123971	4.99	4.42	2.65	2.53	336.658	303.394	401.249	462.015
chr2:31456569-31457279	GALNT14	chr2:31361591/-	-94978	0.46	0.56	0.24	0.29	335.559	216.188	259.971	527.456
chr2:31456569-31457279	CAPN14	chr2:31440410/-	-16159	0.46	0.56	0.24	0.29	0.5492	0	0	0.8725
chr2:31456569-31457279	EHD3	chr2:31456879/+	0	0.46	0.56	0.24	0.29	159.267	68.9295	27.3907	54.5344
chr2:31456569-31457279	XDH	chr2:31637610/-	180331	0.46	0.56	0.24	0.29	32.4026	15.1436	10.0913	36.2108
chr12:107908912-107909846	PWP1	chr12:108079589/+	-169743	0.29	0.27	0.72	0.59	1358.16	1573.37	1968.28	1845.88
chr12:107908912-107909846	BTBD11	chr12:107974633/+	-64787	0.29	0.27	0.72	0.59	0	0	0	0.4363
chr3:71030478-71045507	FOXP1	chr3:71102923/-	57416	3.2	4.46	0.68	0.53	388.832	351.958	231.619	345.094
chr14:95064821-95077642	SERPINA12	chr14:94984180/-	-80641	11.17	5.76	4.49	9.29	0	0	0	0
chr14:95064821-95077642	SERPINA11	chr14:94919121/-	-145700	11.17	5.76	4.49	9.29	0	0	0	0
chr14:95064821-95077642	SERPINA4	chr14:95029802/+	35019	11.17	5.76	4.49	9.29	0	0	0	0
chr14:95064821-95077642	SERPINA5	chr14:95053682/+	11139	11.17	5.76	4.49	9.29	33.501	4.6997	0.9611	1.3088
chr14:95064821-95077642	SERPINA9	chr14:94942669/-	-122152	11.17	5.76	4.49	9.29	0	0	0	0
chr14:95064821-95077642	GSC	chr14:95236498/-	158856	11.17	5.76	4.49	9.29	0	0	0	0
chr14:95064821-95077642	SERPINA3	chr14:95078713/+	-1071	11.17	5.76	4.49	9.29	8.238	1.0444	0.9611	2.1814
chr10:72647687-72648860	SGPL1	chr10:72576566/+	71121	0.8	0.72	0.39	1.02	1224.16	1549.35	1162.42	947.153
chr10:72647687-72648860	PCBD1	chr10:72648010/-	0	0.8	0.72	0.39	1.02	380.594	254.83	243.152	456.344
chr10:72647687-72648860	TBATA	chr10:72545156/-	-102531	0.8	0.72	0.39	1.02	0	0	0	0
chr1:240928540-240929870	GREM2	chr1:240775461/-	-153079	1.52	0.67	0.01	0.69	6.5904	2.611	0.9611	2.6176
chr1:145083299-145118556	PDE4DIP	chr1:145076185/-	-7114	50.47	29.36	4.3	9.33	4300.26	3372.5	1089.8	780.932
chr1:145083299-145118556	SEC22B	chr1:145096406/+	0	50.47	29.36	4.3	9.33	2722.37	2704.44	1451.23	1142.17
chr1:145083299-145118556	NOTCH2NL	chr1:145209112/+	-90556	50.47	29.36	4.3	9.33	295.787	189.948	160.058	243.241
chr1:145083299-145118556	NBPF10	chr1:145293370/+	-174814	50.47	29.36	4.3	9.33	254.827	215.948	232.427	306.614
chr12:117175206-117176620	C12orf49	chr12:117175874/-	0	1.17	1.48	1.02	1.03	907.274	1005.74	852.955	738.177
chr12:117175206-117176620	FBXW8	chr12:117348760/+	-172140	1.17	1.48	1.02	1.03	562.378	515.405	464.2	321.098
chr12:117175206-117176620	MAP1LC3B2	chr12:117013646/+	161560	1.17	1.48	1.02	1.03	687.595	970.757	596.828	304.956
chr12:117175206-117176620	RNFT2	chr12:117176095/+	0	1.17	1.48	1.02	1.03	117.528	154.047	110.524	119.539
chr12:117175206-117176620	HRK	chr12:117319231/-	142611	1.17	1.48	1.02	1.03	4.3936	0.5222	0.4805	0
chr3:191046067-191049952	CCDC50	chr3:191046873/+	0	7.36	4.62	2.66	3.15	3542.87	3360.31	2375.78	2576.2
chr3:191046067-191049952	UTS2B	chr3:191046497/-	0	7.36	4.62	2.66	3.15	0	0	0	0
chr17:41115952-41117300	BRCA1	chr17:41258549/-	141249	1.15	1.53	0.71	1.3	376.749	171.279	957.713	2050.49
chr17:41115952-41117300	CNTD1	chr17:40950853/+	165099	1.15	1.53	0.71	1.3	27.1853	27.6188	20.8698	28.1572
chr17:41115952-41117300	AOC3	chr17:41006464/+	109488	1.15	1.53	0.71	1.3	128.512	39.1018	11.5329	12.9225
chr17:41115952-41117300	AOC2	chr17:40996608/+	119344	1.15	1.53	0.71	1.3	134.553	61.0966	57.6646	68.0589
chr17:41115952-41117300	BECN1	chr17:40976309/-	-139643	1.15	1.53	0.71	1.3	1492.99	1671.6	1241.98	999.27
chr17:41115952-41117300	VPS25	chr17:40925453/+	190499	1.15	1.53	0.71	1.3	1092.35	1102.35	1017.3	846.373
chr17:41115952-41117300	PTGES3L	chr17:41132544/-	15244	1.15	1.53	0.71	1.3	0	0	0	0
chr17:41115952-41117300	G6PC	chr17:41052813/+	63139	1.15	1.53	0.71	1.3	0	0	0	0
chr17:41115952-41117300	RPL27	chr17:41150445/+	-33145	1.15	1.53	0.71	1.3	6650.78	6282.51	6029.31	7304.55
chr17:41115952-41117300	IFI35	chr17:41158741/+	-41441	1.15	1.53	0.71	1.3	249.335	196.345	105.718	86.8187
chr17:41115952-41117300	AARSD1	chr17:41116514/-	0	1.15	1.53	0.71	1.3	364.667	234.465	357.04	575.447
chr17:41115952-41117300	PSME3	chr17:40986110/+	129842	1.15	1.53	0.71	1.3	5087.21	4849.09	6253.24	6816.36
chr17:41115952-41117300	COA3	chr17:40950742/-	-165210	1.15	1.53	0.71	1.3	0	0	0	0
chr17:41115952-41117300	RUNDC1	chr17:41132581/+	-15281	1.15	1.53	0.71	1.3	461.875	469.452	484.382	490.809
chr17:41115952-41117300	WNK4	chr17:40932648/+	183304	1.15	1.53	0.71	1.3	41.7829	24.0209	32.0279	58.4696
chr17:41115952-41117300	RND2	chr17:41177257/+	-59957	1.15	1.53	0.71	1.3	1.0984	0	0	0.8725
chr17:41115952-41117300	VAT1	chr17:41174458/-	57158	1.15	1.53	0.71	1.3	4050.33	6646.48	3365.69	1577.57
chr17:41115952-41117300	PTGES3L-AARSD1	chr17:41131679/-	14379	1.15	1.53	0.71	1.3	0	0	0	0
chr16:85643498-85647415	C16orf74	chr16:85768840/-	121425	8.64	5.77	4.2	8.05	7.6888	7.3107	2.4027	5.6716
chr16:85643498-85647415	GINS2	chr16:85722587/-	75172	8.64	5.77	4.2	8.05	124.668	47.5196	336.377	787.04
chr16:85643498-85647415	COX4I1	chr16:85833172/+	-185757	8.64	5.77	4.2	8.05	4650.6	4072.06	3208.55	3706.16
chr16:85643498-85647415	EMC8	chr16:85833147/-	185732	8.64	5.77	4.2	8.05	0	0	0	0
chr16:85643498-85647415	GSE1	chr16:85646841/+	0	8.64	5.77	4.2	8.05	0	0	0	0
chr3:36688450-36705936	DCLK3	chr3:36780574/-	74638	9.77	4.05	2.06	3.03	0	0	0	0
chr21:38159960-38161429	SIM2	chr21:38071432/+	88528	0.92	0.64	0.75	1.4	552.492	407.311	420.471	669.246
chr21:38159960-38161429	HLCS	chr21:38311293/-	149864	0.92	0.64	0.75	1.4	1102.24	1111.23	936.088	756.501
chr3:107849591-107850714	HHLA2	chr3:108015336/+	-164622	0.43	0.56	1.27	0.86	0	0.5222	0	0.8725
chr3:107849591-107850714	CD47	chr3:107809934/-	-39657	0.43	0.56	1.27	0.86	1310.93	1389.56	1224.41	1003
chr3:107849591-107850714	IFT57	chr3:107941416/-	90702	0.43	0.56	1.27	0.86	562.927	633.943	702.547	668.809
chr1:145648769-145653138	RNF115	chr1:145610989/+	37780	2.93	3.45	1.14	0.95	1335.65	1504.44	715.041	839.393
chr1:145648769-145653138	RBM8A	chr1:145507556/+	141213	2.93	3.45	1.14	0.95	1516.55	1423.74	2017.34	2632.74
chr1:145648769-145653138	PIAS3	chr1:145575987/+	72782	2.93	3.45	1.14	0.95	1550.93	1592.69	1171.55	897.854
chr1:145648769-145653138	CD160	chr1:145706829/-	53691	2.93	3.45	1.14	0.95	26.3615	27.154	16.3383	17.0147
chr1:145648769-145653138	ANKRD34A	chr1:145473208/+	175561	2.93	3.45	1.14	0.95	207.047	63.1854	49.0149	144.843
chr1:145648769-145653138	LIX1L	chr1:145477066/+	171703	2.93	3.45	1.14	0.95	2082.56	1904.96	1484.86	1260.83
chr1:145648769-145653138	POLR3GL	chr1:145470386/-	-178383	2.93	3.45	1.14	0.95	490.433	428.198	271.985	233.843
chr1:145648769-145653138	ANKRD35	chr1:145549208/+	99561	2.93	3.45	1.14	0.95	4.9428	2.611	0	1.3088
chr1:145648769-145653138	ITGA10	chr1:145527612/+	121157	2.93	3.45	1.14	0.95	1937.02	229.765	130.226	891.31
chr1:145648769-145653138	PEX11B	chr1:145516559/+	132210	2.93	3.45	1.14	0.95	566.222	445.431	378.184	342.476
chr1:145648769-145653138	NUDT17	chr1:145589434/-	-59335	2.93	3.45	1.14	0.95	24.7139	15.6658	15.3772	17.0147
chr1:145648769-145653138	GPR89A	chr1:145818825/-	165687	2.93	3.45	1.14	0.95	434.173	406.721	419.37	427.973
chr1:145648769-145653138	POLR3C	chr1:145611043/-	-37726	2.93	3.45	1.14	0.95	650.249	561.88	499.76	769.153
chr1:145648769-145653138	PDZK1	chr1:145727665/+	-74527	2.93	3.45	1.14	0.95	286.785	44.3864	6.6939	3.9614
chr8:131205351-131220978	ASAP1	chr8:131374016/-	153038	8.76	4.19	1.72	3.47	4332.62	2803.66	2555.5	3837.91
chr2:40102306-40102996	TMEM178A	chr2:39934188/+	168118	0.65	0.57	0.11	0.16	0	0	0	0
chr2:40102306-40102996	THUMPD2	chr2:40006415/-	-95891	0.65	0.57	0.11	0.16	152.677	109.661	161.461	277.907
chr4:76252050-76254137	RCHY1	chr4:76419388/-	165251	4.96	1.01	0.09	0.57	565.124	252.219	308.505	646.559
chr4:76252050-76254137	THAP6	chr4:76439653/+	-185516	4.96	1.01	0.09	0.57	232.31	342.559	334.935	277.471
chr11:14395311-14406662	COPB1	chr11:14520530/-	113868	3.4	0.33	0.53	0.5	3915.24	4189.83	3995.63	3187.09
chr11:14395311-14406662	PSMA1	chr11:14541990/-	135328	3.4	0.33	0.53	0.5	2733.89	2372.57	2813.11	3355.73
chr11:14395311-14406662	RRAS2	chr11:14386051/-	-9260	3.4	0.33	0.53	0.5	528.328	730.548	837.578	589.844
chr11:44087178-44089047	C11orf96	chr11:43964105/+	123073	2.75	2.23	1.45	1.7	0	0	0	0
chr11:44087178-44089047	EXT2	chr11:44117098/+	-28051	2.75	2.23	1.45	1.7	2779.49	3716.45	2568	1738.99
chr11:44087178-44089047	ALKBH3	chr11:43904132/+	183046	2.75	2.23	1.45	1.7	350.388	244.909	221.528	341.167
chr11:44087178-44089047	ACCS	chr11:44087728/+	0	2.75	2.23	1.45	1.7	180.686	102.35	44.2095	47.9902
chr11:44087178-44089047	ACCSL	chr11:44069530/+	17648	2.75	2.23	1.45	1.7	1.0984	0	0.4805	0.4363
chr4:160338000-160340348	RAPGEF2	chr4:160188997/+	149003	3.17	1.62	0.81	0.32	1873.86	1432.38	974.051	1480.28
chrX:49011893-49029412	FOXP3	chrX:49114983/-	85571	7.85	3.57	2.01	4.7	4.3936	1.577	0.4805	2.6264
chrX:49011893-49029412	OTUD5	chrX:48815647/-	-196246	7.85	3.57	2.01	4.7	1199.45	1561.88	1102.35	874.295
chrX:49011893-49029412	CCDC22	chrX:49091926/+	-62514	7.85	3.57	2.01	4.7	251.532	183.279	166.747	198.06
chrX:49011893-49029412	GAGE7	chrX:49216677/+	-187265	7.85	3.57	2.01	4.7	0	0	0	0
chrX:49011893-49029412	PLP2	chrX:49028183/+	0	7.85	3.57	2.01	4.7	4028.91	3044.39	3411.34	4462.22
chrX:49011893-49029412	GPKOW	chrX:48980150/-	-31743	7.85	3.57	2.01	4.7	311.944	287.206	320.038	339.422
chrX:49011893-49029412	GAGE8	chrX:49188103/+	-158691	7.85	3.57	2.01	4.7	411.228	0	291.456	141.31
chrX:49011893-49029412	PRICKLE3	chrX:49042775/-	13363	7.85	3.57	2.01	4.7	278.992	203.133	202.787	293.613
chrX:49011893-49029412	WDR45	chrX:48958058/-	-53835	7.85	3.57	2.01	4.7	529.02	298.595	185.243	199.535
chrX:49011893-49029412	CCDC120	chrX:48919765/+	92128	7.85	3.57	2.01	4.7	9.8855	8.3551	4.3248	2.1814
chrX:49011893-49029412	GAGE5	chrX:49216656/+	-187244	7.85	3.57	2.01	4.7	0	0	0	0
chrX:49011893-49029412	GAGE4	chrX:49216648/+	-187236	7.85	3.57	2.01	4.7	102.184	0.8773	28.592	539.947
chrX:49011893-49029412	CACNA1F	chrX:49089832/-	60420	7.85	3.57	2.01	4.7	0.5492	0	0	0
chrX:49011893-49029412	TFE3	chrX:48901042/-	-110851	7.85	3.57	2.01	4.7	1871.66	1607.83	1252.76	1362.05
chrX:49011893-49029412	KCND1	chrX:48828250/-	-183643	7.85	3.57	2.01	4.7	7.1396	6.7885	7.6886	4.3627
chrX:49011893-49029412	PPP1R3F	chrX:49126305/+	-96893	7.85	3.57	2.01	4.7	29.1074	23.4987	12.9745	11.3431
chrX:49011893-49029412	GAGE2D	chrX:49197562/+	-168150	7.85	3.57	2.01	4.7	144.95	230.679	353.489	0
chrX:49011893-49029412	GAGE2E	chrX:49188103/+	-158691	7.85	3.57	2.01	4.7	0	0	0	0
chrX:49011893-49029412	GAGE2A	chrX:49197581/+	-168169	7.85	3.57	2.01	4.7	171.685	406.961	117.876	414.788
chrX:49011893-49029412	GAGE2C	chrX:49197595/+	-168183	7.85	3.57	2.01	4.7	0	0	98.7602	0
chrX:49011893-49029412	GAGE12I	chrX:49216676/+	-187264	7.85	3.57	2.01	4.7	0	0	0	0
chrX:49011893-49029412	GAGE12J	chrX:49178508/+	-149096	7.85	3.57	2.01	4.7	20.3752	163.817	41.2734	29.3351
chrX:49011893-49029412	GRIPAP1	chrX:48858674/-	-153219	7.85	3.57	2.01	4.7	659.586	661.619	484.863	447.618
chrX:49011893-49029412	PRAF2	chrX:48931703/-	-80190	7.85	3.57	2.01	4.7	674.82	982.345	545.175	261.172
chrX:49011893-49029412	MAGIX	chrX:49019180/+	0	7.85	3.57	2.01	4.7	18.6727	13.577	16.8188	6.9804
chrX:49011893-49029412	GAGE10	chrX:49160124/+	-130712	7.85	3.57	2.01	4.7	0	0	0.5094	0
chrX:49011893-49029412	GAGE13	chrX:49188080/+	-158668	7.85	3.57	2.01	4.7	0	0	0	0
chrX:49011893-49029412	SYP	chrX:49056660/-	27248	7.85	3.57	2.01	4.7	10.9839	12.5326	17.2994	10.4706
chr2:113381793-113407341	SLC20A1	chr2:113404139/+	0	3.28	4.55	16.64	21.86	2036.42	2237.08	7257.09	5302.49
chr2:113381793-113407341	CHCHD5	chr2:113343550/+	38243	3.28	4.55	16.64	21.86	163.661	126.371	111.965	130.446
chr2:113381793-113407341	TTL	chr2:113239742/+	142051	3.28	4.55	16.64	21.86	1497.66	1866.84	2874.1	2390.79
chr2:113381793-113407341	POLR1B	chr2:113308442/+	73351	3.28	4.55	16.64	21.86	869.928	817.232	1456.03	1923.1
chr2:113381793-113407341	RGPD5	chr2:113191106/-	-190687	3.28	4.55	16.64	21.86	165.072	397.802	254.017	215.14
chr2:113381793-113407341	IL1A	chr2:113541354/-	134013	3.28	4.55	16.64	21.86	10.4347	0.5222	5.2859	15.7059
chr2:113381793-113407341	IL1B	chr2:113593820/-	186479	3.28	4.55	16.64	21.86	3.2952	2.0888	1.4416	2.1814
chr2:113381793-113407341	RGPD8	chr2:113191221/-	-190572	3.28	4.55	16.64	21.86	5.5139	0	0	0
chr2:113381793-113407341	CKAP2L	chr2:113514731/-	107390	3.28	4.55	16.64	21.86	149.382	66.8407	651.61	1034.41
chr2:200137470-200138387	SATB2	chr2:200320818/-	182431	0.23	0.96	0.63	0.3	378.946	326.371	513.215	528.765
chr6:144471006-144480076	SF3B5	chr6:144416753/-	-54253	2.81	2.2	1.61	0.61	1063.79	996.345	1162.42	1281.78
chr6:144471006-144480076	STX11	chr6:144471653/+	0	2.81	2.2	1.61	0.61	44.485	42.8198	94.666	90.3089
chr6:144471006-144480076	PLAGL1	chr6:144385735/-	-85271	2.81	2.2	1.61	0.61	595.873	786.418	851.97	690.187
chr6:144471006-144480076	UTRN	chr6:144612872/+	-132796	2.81	2.2	1.61	0.61	3208.41	3179.63	2731.86	2090.63
chr2:214143639-214149838	LOC100130451	chr2:214148928/-	0	5.9	2.22	0.92	0.72	0	0	0	0
chr2:214143639-214149838	SPAG16	chr2:214149102/+	0	5.9	2.22	0.92	0.72	162.013	148.825	108.121	127.829
chr2:214143639-214149838	IKZF2	chr2:214016332/-	-127307	5.9	2.22	0.92	0.72	534.918	347.781	184.046	402.682
chr12:124117542-124119137	RILPL2	chr12:123921279/-	-196263	1	1.19	0.71	1.65	390.479	273.107	210.476	245.623
chr12:124117542-124119137	DNAH10	chr12:124247041/+	-127904	1	1.19	0.71	1.65	26.9107	5.2219	2.4027	3.4902
chr12:124117542-124119137	TMED2	chr12:124069075/+	48467	1	1.19	0.71	1.65	8302.21	8320.1	7810.67	7209.01
chr12:124117542-124119137	GTF2H3	chr12:124118285/+	0	1	1.19	0.71	1.65	657.389	559.269	697.261	953.697
chr12:124117542-124119137	EIF2B1	chr12:124118322/-	0	1	1.19	0.71	1.65	1081.37	1026.11	1461.8	1591.09
chr12:124117542-124119137	TCTN2	chr12:124155659/+	-36522	1	1.19	0.71	1.65	321.829	304.961	249.399	246.059
chr12:124117542-124119137	SNRNP35	chr12:123950084/+	167458	1	1.19	0.71	1.65	266.553	217.791	214.877	262.393
chr12:124117542-124119137	ATP6V0A2	chr12:124196864/+	-77727	1	1.19	0.71	1.65	933.635	937.859	720.807	773.079
chr12:124117542-124119137	RILPL1	chr12:124018264/-	-99278	1	1.19	0.71	1.65	321.088	205.185	228.659	273.789
chr12:124117542-124119137	DDX55	chr12:124086671/+	30871	1	1.19	0.71	1.65	421.783	365.013	717.443	998.197
chr11:35843078-35844441	TRIM44	chr11:35684299/+	158779	1.51	1.01	0.83	0.93	2454.91	2458.49	2304.66	2334.07
chr11:35843078-35844441	LDLRAD3	chr11:35965530/+	-121089	1.51	1.01	0.83	0.93	1305.44	1169.71	1135.03	1253.85
chr14:100222179-100223171	HHIPL1	chr14:100111479/+	110700	0.69	0.81	0.42	0.16	1.0984	0	0.4805	0
chr14:100222179-100223171	EML1	chr14:100259744/+	-36573	0.69	0.81	0.42	0.16	417.939	565.013	522.826	343.785
chr14:100222179-100223171	CCDC85C	chr14:100070726/-	-151453	0.69	0.81	0.42	0.16	365.397	460.136	471.98	557.332
chr2:24148197-24164105	SF3B6	chr2:24299313/-	135208	4.66	5.11	2.65	4.67	0	0	0	0
chr2:24148197-24164105	MFSD2B	chr2:24232952/+	-68847	4.66	5.11	2.65	4.67	113.135	132.637	414.224	366.035
chr2:24148197-24164105	TP53I3	chr2:24307200/-	143095	4.66	5.11	2.65	4.67	811.702	1189.03	572.802	220.319
chr2:24148197-24164105	PFN4	chr2:24345416/-	181311	4.66	5.11	2.65	4.67	5.492	12.0104	4.8054	3.0539
chr2:24148197-24164105	FKBP1B	chr2:24272583/+	-108478	4.66	5.11	2.65	4.67	27.4599	10.4439	7.2081	8.2892
chr2:24148197-24164105	FAM228B	chr2:24299743/+	-135638	4.66	5.11	2.65	4.67	0	0	0	0
chr2:24148197-24164105	UBXN2A	chr2:24163375/+	0	4.66	5.11	2.65	4.67	415.742	503.394	641.038	531.819
chr2:24148197-24164105	C2orf44	chr2:24262381/-	98276	4.66	5.11	2.65	4.67	326.223	482.507	532.917	497.79
chr2:24148197-24164105	ATAD2B	chr2:24149983/-	0	4.66	5.11	2.65	4.67	520.09	553.525	432.965	388.721
chr7:50859082-50863284	GRB10	chr7:50861158/-	0	4.24	2.67	2.72	2.49	1715.69	1743.6	1939.93	1749.9
chr19:43335057-43336199	PSG11	chr19:43530630/-	194431	1.21	0.46	0.21	0.21	0	0	0	0
chr19:43335057-43336199	PSG8	chr19:43269830/-	-65227	1.21	0.46	0.21	0.21	1.3345	0	0.4805	0
chr19:43335057-43336199	PSG6	chr19:43422075/-	85876	1.21	0.46	0.21	0.21	0	0	0	0
chr19:43335057-43336199	PSG7	chr19:43433871/-	97672	1.21	0.46	0.21	0.21	0.8293	0	0	0
chr19:43335057-43336199	PSG3	chr19:43244667/-	-90390	1.21	0.46	0.21	0.21	0	0	0	0
chr19:43335057-43336199	PSG1	chr19:43383818/-	47619	1.21	0.46	0.21	0.21	26.8118	4.7311	0	2.9754
chr4:151189203-151190150	DCLK2	chr4:150999425/+	189778	-0.11	0	-0.07	0.47	448.145	154.569	62.9505	104.27
chr6:36390295-36391940	SRSF3	chr6:36562089/+	-170149	1.22	0.99	0.55	1.49	0	0	0	0
chr6:36390295-36391940	ETV7	chr6:36355576/-	-34719	1.22	0.99	0.55	1.49	2.1968	1.5666	0	0.8725
chr6:36390295-36391940	PXT1	chr6:36393867/-	1927	1.22	0.99	0.55	1.49	0	0	0	0.4363
chr6:36390295-36391940	PNPLA1	chr6:36259096/+	131199	1.22	0.99	0.55	1.49	0.5492	0.5222	0	0.4363
chr6:36390295-36391940	C6orf222	chr6:36304661/-	-85634	1.22	0.99	0.55	1.49	0	0	0	0
chr6:36390295-36391940	KCTD20	chr6:36410543/+	-18603	1.22	0.99	0.55	1.49	4103.6	4107.57	3827.01	3649.88
chr6:36390295-36391940	STK38	chr6:36507980/-	116040	1.22	0.99	0.55	1.49	2177.57	1998.43	1338.3	1044.44
chr22:45216224-45224442	PRR5-ARHGAP8	chr22:45098077/+	118147	3.64	1.31	0.08	0.44	12.2526	6.0366	0.6247	0
chr22:45216224-45224442	ARHGAP8	chr22:45182336/+	33888	3.64	1.31	0.08	0.44	0	1.671	0	3.9265
chr22:45216224-45224442	PRR5	chr22:45122456/+	93768	3.64	1.31	0.08	0.44	52.0035	40.8564	99.8078	101.652
chr22:45216224-45224442	PHF21B	chr22:45312509/-	88067	3.64	1.31	0.08	0.44	2.746	1.5666	0.4805	3.4902
chr1:42419832-42422317	GUCA2B	chr1:42619091/+	-196774	1.52	0.89	1.03	2.69	0	0	0	0
chr1:42419832-42422317	HIVEP3	chr1:42384377/-	-35455	1.52	0.89	1.03	2.69	162.562	83.5509	136.473	172.329
chr11:7913184-7928361	TUB	chr11:8060179/+	-131818	11.37	1.11	-0.33	1.84	5.492	0.5222	0	2.1814
chr11:7913184-7928361	NLRP10	chr11:7985058/-	56697	11.37	1.11	-0.33	1.84	3.2952	1.5666	0.4805	0.4363
chr11:7913184-7928361	EIF3F	chr11:8008866/+	-80505	11.37	1.11	-0.33	1.84	2123.2	1946.74	1472.37	1667.88
chr12:71550932-71552618	TSPAN8	chr12:71551566/-	0	1.27	0.86	0	0.19	118.627	6.2663	0.9611	23.1226
chr5:124160015-124161361	ZNF608	chr5:124080804/-	-79211	2.34	1.17	0.55	0.32	32.4026	9.9217	0.9611	4.799
chr12:81093371-81098910	MYF5	chr12:81110707/+	-11797	16.81	4.31	1.19	6.01	0	0	0	0
chr12:81093371-81098910	MYF6	chr12:81101407/+	-2497	16.81	4.31	1.19	6.01	0	0	0	0
chr18:20012089-20013575	CTAGE1	chr18:19997877/-	-14212	1.55	1.03	0.79	1.47	71.9448	49.6084	33.6377	46.2451
chr8:103737618-103823917	ODF1	chr8:103563847/+	173771	47.62	35.58	24.24	36.62	0	0	0	0
chr8:103737618-103823917	KLF10	chr8:103668129/-	-69489	47.62	35.58	24.24	36.62	811.713	841.253	1271.02	1228.55
chr8:103737618-103823917	AZIN1	chr8:103855974/-	32057	47.62	35.58	24.24	36.62	3038.71	2341.51	2374.82	3281.66
chr22:26118336-26119190	MYO18B	chr22:26138119/+	-18929	0.08	1.32	0.36	0.11	7.1396	3.1332	1.9222	1.3088
chr22:26118336-26119190	ADRBK2	chr22:25960860/+	157476	0.08	1.32	0.36	0.11	214.736	185.379	231.619	316.736
chr3:48699926-48702138	COL7A1	chr3:48632592/-	-67334	4.31	2.45	2.7	4.01	2875.6	1047.52	570.399	1191.03
chr3:48699926-48702138	TREX1	chr3:48508066/+	191860	4.31	2.45	2.7	4.01	144.961	115.525	114.44	147.95
chr3:48699926-48702138	CELSR3	chr3:48700347/-	0	4.31	2.45	2.7	4.01	994.041	1053.97	565.742	424.775
chr3:48699926-48702138	PFKFB4	chr3:48594226/-	-105700	4.31	2.45	2.7	4.01	179.587	92.4282	98.5103	87.255
chr3:48699926-48702138	PRKAR2A	chr3:48885269/-	183131	4.31	2.45	2.7	4.01	1550.38	2033.42	2375.3	1732.88
chr3:48699926-48702138	SHISA5	chr3:48542258/-	-157668	4.31	2.45	2.7	4.01	3288.59	2620.89	2332.05	2926.53
chr3:48699926-48702138	SLC26A6	chr3:48672925/-	-27001	4.31	2.45	2.7	4.01	453.093	512.606	381.879	285.917
chr3:48699926-48702138	UCN2	chr3:48601200/-	-98726	4.31	2.45	2.7	4.01	96.6587	42.8198	30.7544	53.6618
chr3:48699926-48702138	UQCRC1	chr3:48647097/-	-52829	4.31	2.45	2.7	4.01	3526.39	3826.11	3187.41	2546.54
chr3:48699926-48702138	IP6K2	chr3:48732850/-	30712	4.31	2.45	2.7	4.01	1219.22	1217.23	733.782	670.118
chr3:48699926-48702138	NCKIPSD	chr3:48723365/-	21227	4.31	2.45	2.7	4.01	609.06	846.475	759.731	539.236
chr3:187663552-187705110	LPP	chr3:187871660/+	-166550	24.69	22.11	10.28	9.81	2082.01	1770.23	969.726	1242.95
chr6:138871209-138877615	HEBP2	chr6:138725335/+	145874	1.99	4.39	1.17	0.51	1055.56	892.428	582.412	481.211
chr6:138871209-138877615	NHSL1	chr6:138893667/-	16052	1.99	4.39	1.17	0.51	339.953	268.407	566.554	1101.16
chr4:146630593-146631595	MMAA	chr4:146560226/+	70367	0.41	1.02	0.6	0.38	229.015	219.321	172.513	141.789
chr4:146630593-146631595	SMAD1	chr4:146435589/+	195004	0.41	1.02	0.6	0.38	454.735	378.59	334.455	441.074
chr9:134508855-134555540	POMT1	chr9:134382754/+	126101	41.05	28.87	8.54	10.85	699.677	747.781	493.993	313.682
chr9:134508855-134555540	UCK1	chr9:134406661/-	-102194	41.05	28.87	8.54	10.85	372.905	322.193	291.687	393.956
chr9:134508855-134555540	RAPGEF1	chr9:134585228/-	29688	41.05	28.87	8.54	10.85	2305.53	2274.15	1844.31	1742.92
chr18:28591242-28591799	DSC2	chr18:28682394/-	90595	-0.02	0.25	0.58	0.16	0	0	0.4805	0
chr18:28591242-28591799	DSC3	chr18:28622780/-	30981	-0.02	0.25	0.58	0.16	0.5492	0	0	0.4363
chr18:28591242-28591799	DSC1	chr18:28742818/-	151019	-0.02	0.25	0.58	0.16	0	0	0	0.4363
chr13:98627686-98629783	IPO5	chr13:98621976/+	5710	1.41	1.29	0.83	2.51	5061.95	5376.5	7863.05	10913
chr13:98627686-98629783	RNF113B	chr13:98829520/-	199737	1.41	1.29	0.83	2.51	0	0	0	0
chr13:98627686-98629783	FARP1	chr13:98794815/+	-165032	1.41	1.29	0.83	2.51	1.6476	2.0888	0.9611	2.1814
chr19:16221784-16223260	AP1M1	chr19:16308664/+	-85404	1.42	1.34	0.86	1.7	1583.88	1536.81	1718.4	1587.17
chr19:16221784-16223260	TPM4	chr19:16187134/+	34650	1.42	1.34	0.86	1.7	23374.4	13083	12366.2	13282.4
chr19:16221784-16223260	CYP4F11	chr19:16045675/-	-176109	1.42	1.34	0.86	1.7	7.6888	11.4883	3.3638	2.1814
chr19:16221784-16223260	CIB3	chr19:16284335/-	61075	1.42	1.34	0.86	1.7	0	0	0	0
chr19:16221784-16223260	RAB8A	chr19:16222489/+	0	1.42	1.34	0.86	1.7	1537.75	1514.36	2160.02	2546.97
chr19:16221784-16223260	FAM32A	chr19:16296211/+	-72951	1.42	1.34	0.86	1.7	1193.95	1059.01	935.608	1203.25
chr19:16221784-16223260	HSH2D	chr19:16244837/+	-21577	1.42	1.34	0.86	1.7	9.3364	9.3995	15.8578	21.8137
chr2:23648465-23649423	KLHL29	chr2:23608297/+	40168	0.74	1.16	0.06	-0.03	377.848	621.932	687.17	455.907
chr1:19810331-19813245	CAPZB	chr1:19812134/-	0	4.52	3.44	2.99	2.6	4173.35	4034.99	2979.34	2826.63
chr1:19810331-19813245	NBL1	chr1:19969722/+	-156477	4.52	3.44	2.99	2.6	309.731	300.783	338.395	330.16
chr1:19810331-19813245	HTR6	chr1:19991779/+	-178534	4.52	3.44	2.99	2.6	0	0	0.4805	0
chr1:19810331-19813245	MINOS1-NBL1	chr1:19923470/+	-110225	4.52	3.44	2.99	2.6	0	0	0	0
chr1:19810331-19813245	MINOS1	chr1:19923470/+	-110225	4.52	3.44	2.99	2.6	0	0	0	0
chr1:19810331-19813245	AKR7A2	chr1:19638639/-	-171692	4.52	3.44	2.99	2.6	799.021	1560.3	1139.71	670.494
chr1:19810331-19813245	AKR7A3	chr1:19615279/-	-195052	4.52	3.44	2.99	2.6	4.6078	33.8381	7.6982	6.5834
chr1:19810331-19813245	PQLC2	chr1:19652019/+	158312	4.52	3.44	2.99	2.6	199.358	196.345	270.543	199.378
chr2:69525107-69535033	GFPT1	chr2:69614385/-	79352	2.17	2.28	0.75	1.03	2205.03	2173.89	1945.22	1652.61
chr2:69525107-69535033	NFU1	chr2:69642430/-	107397	2.17	2.28	0.75	1.03	402.012	413.055	345.026	331.569
chr8:81811353-81812826	PAG1	chr8:81905541/-	92715	0.95	1.04	0.32	0.17	221.876	491.384	1201.35	433.221
chr8:81811353-81812826	ZNF704	chr8:81787015/-	-24338	0.95	1.04	0.32	0.17	148.832	54.3081	24.988	54.9706
chr15:36871066-36872451	C15orf41	chr15:36871803/+	0	1.47	1.07	0.7	1.27	194.416	145.692	152.331	215.956
chr1:180470762-180503706	XPR1	chr1:180601145/+	-97439	6.75	5.26	2.52	13.09	2241.27	3701.31	2627.1	1580.19
chr1:180470762-180503706	ACBD6	chr1:180472021/-	0	6.75	5.26	2.52	13.09	579.403	480.94	584.335	671.427
chr19:35911013-35911901	USF2	chr19:35759895/+	151118	0.86	0.45	0.12	0.31	1187.91	913.316	929.841	1290.5
chr19:35911013-35911901	FFAR1	chr19:35842444/+	68569	0.86	0.45	0.12	0.31	0	0	0	0
chr19:35911013-35911901	ATP4A	chr19:36054559/-	142658	0.86	0.45	0.12	0.31	0	0	0	0
chr19:35911013-35911901	HAMP	chr19:35773409/+	137604	0.86	0.45	0.12	0.31	0	1.0444	0	0
chr19:35911013-35911901	CD22	chr19:35823455/+	87558	0.86	0.45	0.12	0.31	11.5331	3.6554	2.4027	4.799
chr19:35911013-35911901	HAUS5	chr19:36103645/+	-191744	0.86	0.45	0.12	0.31	201.555	126.893	281.115	527.02
chr19:35911013-35911901	SBSN	chr19:36019252/-	107351	0.86	0.45	0.12	0.31	1.0984	2.611	6.7275	4.3627
chr19:35911013-35911901	GAPDHS	chr19:36024313/+	-112412	0.86	0.45	0.12	0.31	6.0467	4.5483	5.2475	11.4609
chr19:35911013-35911901	KRTDAP	chr19:35981432/-	69531	0.86	0.45	0.12	0.31	0	0	0	0
chr19:35911013-35911901	TMEM147	chr19:36036501/+	-124600	0.86	0.45	0.12	0.31	707.915	684.073	787.602	948.898
chr19:35911013-35911901	DMKN	chr19:35992812/-	80911	0.86	0.45	0.12	0.31	42.8374	1.5666	1.4416	1.7451
chr19:35911013-35911901	LSR	chr19:35739558/+	171455	0.86	0.45	0.12	0.31	42.2882	26.1097	22.5853	34.4657
chr19:35911013-35911901	MAG	chr19:35786515/+	124498	0.86	0.45	0.12	0.31	0	0	0	0
chr19:35911013-35911901	FFAR3	chr19:35849781/+	61232	0.86	0.45	0.12	0.31	25.2631	3.0131	0.9611	0.8725
chr19:35911013-35911901	FAM187B	chr19:35719627/-	-191386	0.86	0.45	0.12	0.31	0	0	0	0
chr9:125112560-125113528	MORN5	chr9:124922186/+	190374	0.77	1.23	0.27	0.45	0	0	0	0
chr9:125112560-125113528	PTGS1	chr9:125132808/+	-19280	0.77	1.23	0.27	0.45	1441.64	1428.72	232.581	153.132
chr9:125112560-125113528	MRRF	chr9:125033142/+	79418	0.77	1.23	0.27	0.45	566.771	485.118	602.595	847.682
chr9:125112560-125113528	LHX6	chr9:124991090/-	-121470	0.77	1.23	0.27	0.45	34.5994	13.577	2.4027	8.7255
chr9:125112560-125113528	NDUFA8	chr9:124922097/-	-190463	0.77	1.23	0.27	0.45	936.93	848.042	693.417	683.207
chr9:125112560-125113528	RBM18	chr9:125027142/-	-85418	0.77	1.23	0.27	0.45	682.652	783.812	776.069	723.78
chr4:76437055-76440874	RCHY1	chr4:76439639/-	0	4.83	3.16	2.35	3.13	565.124	252.219	308.505	646.559
chr4:76437055-76440874	G3BP2	chr4:76587232/-	146358	4.83	3.16	2.35	3.13	5458.47	6091.91	5649.21	5556.83
chr4:76437055-76440874	CDKL2	chr4:76551200/-	110326	4.83	3.16	2.35	3.13	7.1396	1.5666	1.4416	2.6176
chr4:76437055-76440874	THAP6	chr4:76440642/+	0	4.83	3.16	2.35	3.13	232.31	342.559	334.935	277.471
chr4:76437055-76440874	C4orf26	chr4:76481257/+	-40383	4.83	3.16	2.35	3.13	0	0.5222	0.4805	0
chr16:473568-476787	NME4	chr16:448989/+	24579	4.94	3.74	3.52	4.94	687.595	267.885	302.739	597.26
chr16:473568-476787	RAB11FIP3	chr16:475667/+	0	4.94	3.74	3.52	4.94	953.955	1271.54	1259.01	901.78
chr16:473568-476787	ITFG3	chr16:304386/+	169182	4.94	3.74	3.52	4.94	2033.68	4519.58	2600.67	769.589
chr16:473568-476787	AXIN1	chr16:402675/-	-70893	4.94	3.74	3.52	4.94	536.566	613.055	737.146	834.158
chr16:473568-476787	NHLRC4	chr16:616994/+	-140207	4.94	3.74	3.52	4.94	7.1396	4.6997	1.9222	0.4363
chr16:473568-476787	RAB40C	chr16:639356/+	-162569	4.94	3.74	3.52	4.94	398.168	446.475	413.743	304.52
chr16:473568-476787	CAPN15	chr16:577855/+	-101068	4.94	3.74	3.52	4.94	0	0	0	0
chr16:473568-476787	RGS11	chr16:325942/-	-147626	4.94	3.74	3.52	4.94	1.0984	0	0	0.8725
chr16:473568-476787	MRPL28	chr16:420568/-	-53000	4.94	3.74	3.52	4.94	1175.28	910.705	905.814	1113.81
chr16:473568-476787	PDIA2	chr16:333117/+	140451	4.94	3.74	3.52	4.94	3.2952	1.5666	0.9611	1.7451
chr16:473568-476787	ARHGDIG	chr16:330605/+	142963	4.94	3.74	3.52	4.94	0	0	0	0
chr16:473568-476787	PIGQ	chr16:619967/+	-143180	4.94	3.74	3.52	4.94	655.192	647.044	542.566	386.54
chr16:473568-476787	TMEM8A	chr16:431949/-	-41619	4.94	3.74	3.52	4.94	787.549	1086.16	967.804	691.059
chr16:473568-476787	DECR2	chr16:451857/+	21711	4.94	3.74	3.52	4.94	366.864	563.969	370.976	167.093
chr16:473568-476787	LUC7L	chr16:279448/-	-194120	4.94	3.74	3.52	4.94	598.625	884.595	945.219	841.138
chr16:473568-476787	PRR35	chr16:610421/+	-133634	4.94	3.74	3.52	4.94	0	0	0	0
chr5:42807689-42813206	CCDC152	chr5:42759221/+	48468	7.64	3.85	1.13	2.63	63.6794	23.4465	1.6675	3.1455
chr5:42807689-42813206	SEPP1	chr5:42808467/-	0	7.64	3.85	1.13	2.63	3712.6	1617.28	128.078	159.585
chr12:101381427-101382190	ANO4	chr12:101295423/+	86004	0.53	0.54	0.52	0.01	1.0984	0	0.4805	1.3088
chr5:34563776-34564619	RAI14	chr5:34656432/+	-91813	0.45	0.49	0.84	0.54	3896.55	1931.59	2283.04	3571.78
chr11:129764960-129766021	APLP2	chr11:129939715/+	-173694	0.71	0.73	0.63	0.6	4612.16	8865.27	6860.64	3599.7
chr11:129764960-129766021	NFRKB	chr11:129765489/-	0	0.71	0.73	0.63	0.6	505.81	632.898	597.789	493.863
chr11:129764960-129766021	PRDM10	chr11:129817516/-	51495	0.71	0.73	0.63	0.6	257.024	183.285	190.293	273.091
chr11:129764960-129766021	TMEM45B	chr11:129722369/+	42591	0.71	0.73	0.63	0.6	3.2952	3.1332	3.3638	0.8725
chr19:770149-799034	ARID3A	chr19:926036/+	-127002	19.99	12.75	7.95	15.24	221.326	127.937	121.576	195.887
chr19:770149-799034	KISS1R	chr19:917341/+	-118307	19.99	12.75	7.95	15.24	0	0.5222	0	0
chr19:770149-799034	ELANE	chr19:852290/+	-53256	19.99	12.75	7.95	15.24	11.5331	0.5222	0	0.8725
chr19:770149-799034	WDR18	chr19:984327/+	-185293	19.99	12.75	7.95	15.24	576.108	475.718	541.086	623.873
chr19:770149-799034	PRSS57	chr19:695460/-	-74689	19.99	12.75	7.95	15.24	0	0	0	0
chr19:770149-799034	CFD	chr19:859664/+	-60630	19.99	12.75	7.95	15.24	85.1255	77.2846	48.5344	29.2304
chr19:770149-799034	HCN2	chr19:589892/+	180257	19.99	12.75	7.95	15.24	62.0593	96.0836	70.6391	23.9951
chr19:770149-799034	FSTL3	chr19:676388/+	93761	19.99	12.75	7.95	15.24	4896.09	5214.62	2737.15	2344.11
chr19:770149-799034	AZU1	chr19:827830/+	-28796	19.99	12.75	7.95	15.24	0.5492	0.5222	0.4805	0.8725
chr19:770149-799034	R3HDM4	chr19:913224/-	114190	19.99	12.75	7.95	15.24	0	0	0	0
chr19:770149-799034	LPPR3	chr19:821584/-	22550	19.99	12.75	7.95	15.24	0.5492	0	2.4027	2.6176
chr19:770149-799034	MED16	chr19:891148/-	92114	19.99	12.75	7.95	15.24	1115.42	988.512	922.633	890.874
chr19:770149-799034	RNF126	chr19:663232/-	-106917	19.99	12.75	7.95	15.24	565.124	539.426	921.672	1157.44
chr19:770149-799034	POLRMT	chr19:633567/-	-136582	19.99	12.75	7.95	15.24	489.335	535.248	829.889	935.81
chr19:770149-799034	PALM	chr19:708952/+	61197	19.99	12.75	7.95	15.24	18.6727	2.611	0.4805	0.4363
chr19:770149-799034	PTBP1	chr19:797391/+	0	19.99	12.75	7.95	15.24	6452.52	5884.07	9369.05	11652
chr19:770149-799034	BSG	chr19:580378/+	189771	19.99	12.75	7.95	15.24	10458.4	14255.9	9787.6	7578.97
chr19:770149-799034	FGF22	chr19:639894/+	130255	19.99	12.75	7.95	15.24	1.0984	2.0888	0.9611	5.6716
chr19:770149-799034	PRTN3	chr19:840984/+	-41950	19.99	12.75	7.95	15.24	4.3936	0	0	0
chr19:770149-799034	MISP	chr19:756889/+	13260	19.99	12.75	7.95	15.24	0	0	0	0
chr17:39940223-39970040	KLHL10	chr17:39994042/+	-24002	13.41	10.28	8.25	11.2	1.0984	0.5222	1.4416	1.7451
chr17:39940223-39970040	KLHL11	chr17:40021683/-	51643	13.41	10.28	8.25	11.2	241.097	397.911	377.703	295.358
chr17:39940223-39970040	HAP1	chr17:39890897/-	-49326	13.41	10.28	8.25	11.2	1.0984	3.6554	1.4416	0.4363
chr17:39940223-39970040	CNP	chr17:40118758/+	-148718	13.41	10.28	8.25	11.2	1805.55	2261.76	1818.4	1492.2
chr17:39940223-39970040	FKBP10	chr17:39968961/+	0	13.41	10.28	8.25	11.2	5827.53	4076.24	2892.84	3563.06
chr17:39940223-39970040	NKIRAS2	chr17:40169593/+	-199553	13.41	10.28	8.25	11.2	1116.52	1126.89	896.204	697.604
chr17:39940223-39970040	EIF1	chr17:39845126/+	95097	13.41	10.28	8.25	11.2	5050.42	5689.82	6556.94	6301.99
chr17:39940223-39970040	DNAJC7	chr17:40149256/-	179216	13.41	10.28	8.25	11.2	1673.62	1215	1412.26	2156.8
chr17:39940223-39970040	NT5C3B	chr17:39992522/-	22482	13.41	10.28	8.25	11.2	0	0	0	0
chr17:39940223-39970040	KRT17	chr17:39780881/-	-159342	13.41	10.28	8.25	11.2	157.07	67.3629	5.2859	11.3431
chr17:39940223-39970040	KRT16	chr17:39769078/-	-171145	13.41	10.28	8.25	11.2	2.8613	0.5222	0	0.4363
chr17:39940223-39970040	JUP	chr17:39942963/-	0	13.41	10.28	8.25	11.2	3180.4	5310.18	1637.67	630.854
chr17:39940223-39970040	KRT14	chr17:39743146/-	-197077	13.41	10.28	8.25	11.2	10.3194	12.5326	0.4805	0
chr17:39940223-39970040	P3H4	chr17:39968450/-	0	13.41	10.28	8.25	11.2	0	0	0	0
chr17:39940223-39970040	TTC25	chr17:40086875/+	-116835	13.41	10.28	8.25	11.2	10.9839	15.6658	6.7275	6.5441
chr17:39940223-39970040	ACLY	chr17:40070148/-	100108	13.41	10.28	8.25	11.2	11248.7	14226.6	9646.32	8959.78
chr17:39940223-39970040	GAST	chr17:39871683/+	68540	13.41	10.28	8.25	11.2	0	0	0	0
chr10:135207037-135208716	UTF1	chr10:135043777/+	163260	2.65	1.25	0.83	2.65	0	0	0	0
chr10:135207037-135208716	CALY	chr10:135150474/-	-56563	2.65	1.25	0.83	2.65	0	0	0	0
chr10:135207037-135208716	ZNF511	chr10:135122392/+	84645	2.65	1.25	0.83	2.65	316.579	369.42	532.186	535.213
chr10:135207037-135208716	FUOM	chr10:135171528/-	-35509	2.65	1.25	0.83	2.65	0	0	0	0
chr10:135207037-135208716	PAOX	chr10:135192740/+	14297	2.65	1.25	0.83	2.65	17.0251	2.611	2.8832	2.6176
chr10:135207037-135208716	SPRN	chr10:135237200/-	28484	2.65	1.25	0.83	2.65	60.3952	47.953	65.7809	69.3241
chr10:135207037-135208716	CYP2E1	chr10:135340866/+	-132150	2.65	1.25	0.83	2.65	1.6476	2.0888	0.9611	0.4363
chr10:135207037-135208716	MTG1	chr10:135207620/+	0	2.65	1.25	0.83	2.65	394.873	381.723	484.863	496.481
chr10:135207037-135208716	SYCE1	chr10:135373656/-	164940	2.65	1.25	0.83	2.65	2.2133	3.2219	4.3777	2.6613
chr10:135207037-135208716	ECHS1	chr10:135186907/-	-20130	2.65	1.25	0.83	2.65	1863.97	2222.98	1806.82	1560.99
chr10:135207037-135208716	VENTX	chr10:135051407/+	155630	2.65	1.25	0.83	2.65	0	0	0	0
chr10:135207037-135208716	ADAM8	chr10:135090406/-	-116631	2.65	1.25	0.83	2.65	16.4759	17.7546	12.494	20.0686
chr10:135207037-135208716	TUBGCP2	chr10:135122659/-	-84378	2.65	1.25	0.83	2.65	1625.93	1894.81	1887.8	1805.84
chr10:135207037-135208716	PRAP1	chr10:135160843/+	46194	2.65	1.25	0.83	2.65	1.6476	0	0	0
chr2:239468635-239479002	ASB1	chr2:239335625/+	133010	2.63	1.57	-0.29	-0.56	800.274	598.956	784.238	821.135
chr15:45878029-45881814	BLOC1S6	chr15:45879416/+	0	4.52	3.94	2.47	2.92	0	0	0	0
chr15:45878029-45881814	SQRDL	chr15:45923345/+	-41531	4.52	3.94	2.47	2.92	563.476	538.381	829.889	479.466
chr15:45878029-45881814	C15orf48	chr15:45722967/+	155062	4.52	3.94	2.47	2.92	0.5492	0	1.4416	1.3088
chr15:45878029-45881814	SPATA5L1	chr15:45694518/+	183511	4.52	3.94	2.47	2.92	291.624	336.292	389.716	416.643
chr15:45878029-45881814	SLC30A4	chr15:45815001/-	-63028	4.52	3.94	2.47	2.92	226.269	272.063	185.007	92.4903
chr15:82439111-82439698	SAXO2	chr15:82555151/+	-115453	0.4	0.38	0.6	0.09	0	0	0	0
chr15:82439111-82439698	EFTUD1	chr15:82554137/-	114439	0.4	0.38	0.6	0.09	486.039	690.339	630.466	459.834
chr15:82439111-82439698	MEX3B	chr15:82338483/-	-100628	0.4	0.38	0.6	0.09	95.0111	171.279	97.0687	51.9167
chr11:27527262-27536717	LGR4	chr11:27494333/-	-32929	4.36	4.23	1.91	2.02	829.288	1046.48	422.874	244.75
chr11:27527262-27536717	BDNF	chr11:27680131/-	143414	4.36	4.23	1.91	2.02	45.122	27.2689	8.544	30.7225
chr11:27527262-27536717	LIN7C	chr11:27528325/-	0	4.36	4.23	1.91	2.02	1913.95	2356.14	2506.49	1996.83
chr11:27527262-27536717	CCDC34	chr11:27384794/-	-142468	4.36	4.23	1.91	2.02	219.679	163.969	360.404	641.324
chr11:534106-536765	B4GALNT4	chr11:369794/+	164312	4.74	2.7	2.2	2.65	212.539	133.681	91.3023	138.735
chr11:534106-536765	PTDSS2	chr11:450279/+	83827	4.74	2.7	2.2	2.65	541.508	635.509	652.571	530.51
chr11:534106-536765	IRF7	chr11:615646/-	78881	4.74	2.7	2.2	2.65	148.283	555.091	409.899	72.8579
chr11:534106-536765	ANO9	chr11:442010/-	-92096	4.74	2.7	2.2	2.65	2.1968	2.611	0	0.4363
chr11:534106-536765	PHRF1	chr11:576445/+	-39680	4.74	2.7	2.2	2.65	1998.53	2314.88	2716	3152.52
chr11:534106-536765	HRAS	chr11:534374/-	0	4.74	2.7	2.2	2.65	972.079	1026.63	1410.86	1592.84
chr11:534106-536765	DEAF1	chr11:695753/-	158988	4.74	2.7	2.2	2.65	1012.17	704.961	648.554	984.507
chr11:534106-536765	CDHR5	chr11:625066/-	88301	4.74	2.7	2.2	2.65	11.5331	9.9217	11.0524	5.6716
chr11:534106-536765	RASSF7	chr11:560970/+	-24205	4.74	2.7	2.2	2.65	614.002	396.345	250.841	300.157
chr11:534106-536765	LRRC56	chr11:537521/+	-756	4.74	2.7	2.2	2.65	28.0091	33.9426	11.0524	1.3088
chr11:534106-536765	RNH1	chr11:507282/-	-26824	4.74	2.7	2.2	2.65	3717.51	3703.92	3333.49	3170.85
chr11:534106-536765	SIGIRR	chr11:417396/-	-116710	4.74	2.7	2.2	2.65	157.07	226.632	234.983	88.5638
chr11:534106-536765	SCT	chr11:627172/-	90407	4.74	2.7	2.2	2.65	0.5492	1.0444	0	0.4363
chr11:534106-536765	PKP3	chr11:394182/+	139924	4.74	2.7	2.2	2.65	1364.21	716.971	519.462	980.31
chr11:534106-536765	EPS8L2	chr11:706119/+	-169354	4.74	2.7	2.2	2.65	268.557	183.812	63.431	19.6324
chr11:534106-536765	LMNTD2	chr11:560778/-	24013	4.74	2.7	2.2	2.65	0	0	0	0
chr11:534106-536765	TMEM80	chr11:695590/+	-158825	4.74	2.7	2.2	2.65	375.102	277.807	177.011	230.519
chr12:67905602-67911540	DYRK2	chr12:68042511/+	-130971	1.84	0.98	0.54	-0.2	661.783	500.261	822.681	770.025
chr4:40023595-40024921	RHOH	chr4:40192630/+	-167709	1.6	1.06	-0.01	0.67	1.6476	0	0	0
chr4:40023595-40024921	PDS5A	chr4:39979575/-	-44020	1.6	1.06	-0.01	0.67	4965.84	4522.72	5067.28	6343.87
chr4:40023595-40024921	N4BP2	chr4:40058523/+	-33602	1.6	1.06	-0.01	0.67	769.974	613.055	373.859	464.633
chr5:41868957-41872794	OXCT1	chr5:41870790/-	0	5.21	3.04	1.79	3.77	3235.87	2234.99	1902.45	3026.88
chr5:41868957-41872794	FBXO4	chr5:41925353/+	-52559	5.21	3.04	1.79	3.77	203.203	75.718	77.3667	189.78
chrX:49125076-49127228	FOXP3	chrX:49121287/-	-3789	2.41	1.24	0.73	1.98	4.3936	1.577	0.4805	2.6264
chrX:49125076-49127228	CCDC22	chrX:49091926/+	33150	2.41	1.24	0.73	1.98	251.532	183.279	166.747	198.06
chrX:49125076-49127228	PRAF2	chrX:48931703/-	-193373	2.41	1.24	0.73	1.98	674.82	982.345	545.175	261.172
chrX:49125076-49127228	GAGE7	chrX:49216677/+	-89449	2.41	1.24	0.73	1.98	0	0	0	0
chrX:49125076-49127228	PLP2	chrX:49028183/+	96893	2.41	1.24	0.73	1.98	4028.91	3044.39	3411.34	4462.22
chrX:49125076-49127228	GPKOW	chrX:48980150/-	-144926	2.41	1.24	0.73	1.98	311.944	287.206	320.038	339.422
chrX:49125076-49127228	GAGE8	chrX:49188103/+	-60875	2.41	1.24	0.73	1.98	411.228	0	291.456	141.31
chrX:49125076-49127228	PRICKLE3	chrX:49042775/-	-82301	2.41	1.24	0.73	1.98	278.992	203.133	202.787	293.613
chrX:49125076-49127228	WDR45	chrX:48958058/-	-167018	2.41	1.24	0.73	1.98	529.02	298.595	185.243	199.535
chrX:49125076-49127228	GAGE5	chrX:49216656/+	-89428	2.41	1.24	0.73	1.98	0	0	0	0
chrX:49125076-49127228	GAGE4	chrX:49216648/+	-89420	2.41	1.24	0.73	1.98	102.184	0.8773	28.592	539.947
chrX:49125076-49127228	CACNA1F	chrX:49089832/-	-35244	2.41	1.24	0.73	1.98	0.5492	0	0	0
chrX:49125076-49127228	GAGE6	chrX:49325479/+	-198251	2.41	1.24	0.73	1.98	0	0	0	0
chrX:49125076-49127228	MAGIX	chrX:49019180/+	105896	2.41	1.24	0.73	1.98	18.6727	13.577	16.8188	6.9804
chrX:49125076-49127228	PPP1R3F	chrX:49126305/+	0	2.41	1.24	0.73	1.98	29.1074	23.4987	12.9745	11.3431
chrX:49125076-49127228	GAGE2D	chrX:49197562/+	-70334	2.41	1.24	0.73	1.98	144.95	230.679	353.489	0
chrX:49125076-49127228	GAGE2E	chrX:49188103/+	-60875	2.41	1.24	0.73	1.98	0	0	0	0
chrX:49125076-49127228	GAGE2A	chrX:49197581/+	-70353	2.41	1.24	0.73	1.98	171.685	406.961	117.876	414.788
chrX:49125076-49127228	GAGE2B	chrX:49235707/+	-108479	2.41	1.24	0.73	1.98	0	8.8198	0	0
chrX:49125076-49127228	GAGE2C	chrX:49197595/+	-70367	2.41	1.24	0.73	1.98	0	0	98.7602	0
chrX:49125076-49127228	GAGE12H	chrX:49296779/+	-169551	2.41	1.24	0.73	1.98	0	0	0	0
chrX:49125076-49127228	GAGE12I	chrX:49216676/+	-89448	2.41	1.24	0.73	1.98	0	0	0	0
chrX:49125076-49127228	GAGE12J	chrX:49178508/+	-51280	2.41	1.24	0.73	1.98	20.3752	163.817	41.2734	29.3351
chrX:49125076-49127228	GAGE12B	chrX:49296814/+	-169586	2.41	1.24	0.73	1.98	0	0	0	0
chrX:49125076-49127228	GAGE12C	chrX:49296779/+	-169551	2.41	1.24	0.73	1.98	0	0	0	0
chrX:49125076-49127228	GAGE12D	chrX:49296768/+	-169540	2.41	1.24	0.73	1.98	109.065	170.856	59.4234	10.2917
chrX:49125076-49127228	GAGE12E	chrX:49296779/+	-169551	2.41	1.24	0.73	1.98	0	0	0	0
chrX:49125076-49127228	GAGE12F	chrX:49296745/+	-169517	2.41	1.24	0.73	1.98	123.657	94.3551	0	0
chrX:49125076-49127228	GAGE12G	chrX:49296779/+	-169551	2.41	1.24	0.73	1.98	0	0	0	0
chrX:49125076-49127228	GAGE10	chrX:49160124/+	-32896	2.41	1.24	0.73	1.98	0	0	0.5094	0
chrX:49125076-49127228	GAGE13	chrX:49188080/+	-60852	2.41	1.24	0.73	1.98	0	0	0	0
chrX:49125076-49127228	SYP	chrX:49056660/-	-68416	2.41	1.24	0.73	1.98	10.9839	12.5326	17.2994	10.4706
chr1:27815918-27817812	FCN3	chr1:27701314/-	-114604	4.89	3.08	2.15	2.14	0	0	0	0.8725
chr1:27815918-27817812	GPR3	chr1:27720297/+	95621	4.89	3.08	2.15	2.14	22.5171	5.7441	45.1706	95.5442
chr1:27815918-27817812	SYTL1	chr1:27671787/+	144131	4.89	3.08	2.15	2.14	222.425	71.0183	32.6766	58.0246
chr1:27815918-27817812	WASF2	chr1:27816697/-	0	4.89	3.08	2.15	2.14	4730.78	4434.99	3536.28	3707.03
chr1:27815918-27817812	IFI6	chr1:27995856/-	178044	4.89	3.08	2.15	2.14	277.344	340.992	113.407	60.2059
chr1:27815918-27817812	CD164L2	chr1:27709822/-	-106096	4.89	3.08	2.15	2.14	0	0	0	0
chr1:27815918-27817812	MAP3K6	chr1:27693356/-	-122562	4.89	3.08	2.15	2.14	706.817	469.974	440.654	551.015
chr1:27815918-27817812	FGR	chr1:27950439/-	132627	4.89	3.08	2.15	2.14	12.0823	2.0888	0	0
chr1:27815918-27817812	AHDC1	chr1:27878699/-	60887	4.89	3.08	2.15	2.14	928.692	842.298	765.497	699.785
chr1:27815918-27817812	TMEM222	chr1:27648635/+	167283	4.89	3.08	2.15	2.14	428.374	363.969	345.988	470.741
chr8:85985048-85990081	LRRCC1	chr8:86019322/+	-29241	4.12	5.45	1.49	0.29	367.413	219.843	235.464	561.05
chr8:85985048-85990081	E2F5	chr8:86089618/+	-99537	4.12	5.45	1.49	0.29	100.635	114.663	132.134	141.986
chr8:85985048-85990081	CA13	chr8:86157715/+	-167634	4.12	5.45	1.49	0.29	295.259	201.044	243.056	227.299
chr8:85985048-85990081	C8orf59	chr8:86129730/-	139649	4.12	5.45	1.49	0.29	527.471	363.88	417.866	622.887
chr11:10476194-10477168	SBF2	chr11:10315753/-	-160441	0.13	0.05	0.47	0.68	998.682	1055.33	761.264	624.1
chr11:10476194-10477168	MRVI1	chr11:10648129/-	170961	0.13	0.05	0.47	0.68	14.2791	0.5222	0	0
chr11:10476194-10477168	LYVE1	chr11:10590364/-	113196	0.13	0.05	0.47	0.68	0.5492	0	0	0
chr11:10476194-10477168	AMPD3	chr11:10476665/+	0	0.13	0.05	0.47	0.68	71.9448	16.188	32.6766	54.0981
chr11:10476194-10477168	MTRNR2L8	chr11:10530722/-	53554	0.13	0.05	0.47	0.68	0	0	0	0
chr11:10476194-10477168	RNF141	chr11:10555751/-	78583	0.13	0.05	0.47	0.68	719.997	892.95	716.002	458.961
chr11:10476194-10477168	ADM	chr11:10327226/+	148968	0.13	0.05	0.47	0.68	94.4619	34.9869	20.1826	26.6128
chr5:78530959-78533562	JMY	chr5:78531924/+	0	2.41	2.03	0.95	1.08	708.464	897.128	512.734	398.319
chr5:78530959-78533562	BHMT2	chr5:78365546/+	165413	2.41	2.03	0.95	1.08	0	0	0	0.4363
chr5:78530959-78533562	BHMT	chr5:78407603/+	123356	2.41	2.03	0.95	1.08	0.5492	0	0	0.4363
chr5:78530959-78533562	DMGDH	chr5:78365496/-	-165463	2.41	2.03	0.95	1.08	0	0	0	0
chr4:113810297-113811371	ANK2	chr4:113825610/+	-14239	0.91	0.39	-0.09	0	412.447	98.6945	44.6901	139.608
chr1:93249496-93251602	FAM69A	chr1:93341986/-	90384	2.4	1.51	0.81	1.12	620.593	574.413	434.406	278.343
chr1:93249496-93251602	RPL5	chr1:93297593/+	-45991	2.4	1.51	0.81	1.12	11985.7	11273.1	10572.8	12551.6
chr1:93249496-93251602	EVI5	chr1:93257960/-	6358	2.4	1.51	0.81	1.12	1862.33	1898.69	1542.05	936.246
chr17:66787898-66789510	FAM20A	chr17:66597094/-	-190804	0.33	1.36	1.14	0.73	3.2952	2.611	2.4027	0.4363
chr17:66787898-66789510	ABCA8	chr17:66938179/-	148669	0.33	1.36	1.14	0.73	322.928	46.4752	0.9611	29.2304
chr9:75123353-75125118	ZFAND5	chr9:74980162/-	-143191	1.06	0.52	0.97	0.52	2692.16	2629.24	2157.14	1650.43
chr9:75123353-75125118	TMC1	chr9:75136716/+	-11598	1.06	0.52	0.97	0.52	2.746	0	0.4805	0
chr5:153262894-153285281	FAM114A2	chr5:153414526/-	129245	31.01	2.24	1.09	11.81	596.428	677.285	567.516	456.78
chr5:153262894-153285281	MFAP3	chr5:153418518/+	-133237	31.01	2.24	1.09	11.81	1751.94	1556.66	1357.52	1272.18
chr6:56299906-56300820	COL21A1	chr6:56112377/-	-187529	0.49	0.11	0.06	-0.07	3.2952	2.0888	0.4805	1.7451
chr8:90769050-90770983	OSGIN2	chr8:90914095/+	-143112	2.99	2.81	1.98	2.37	593.133	646.475	521.384	551.452
chr8:90769050-90770983	RIPK2	chr8:90769974/+	0	2.99	2.81	1.98	2.37	415.193	489.817	414.224	391.339
chr2:164733396-164734698	FIGN	chr2:164592512/-	-140884	1.84	0.62	-0.11	0.52	241.647	183.29	215.281	312.809
chr1:209861796-209862620	G0S2	chr1:209848997/+	12799	0.33	0.79	0.69	0.54	0	0	0	0
chr1:209861796-209862620	IRF6	chr1:209969896/-	107276	0.33	0.79	0.69	0.54	22.5171	3.6554	0.4805	0.8725
chr1:209861796-209862620	CAMK1G	chr1:209768299/+	93497	0.33	0.79	0.69	0.54	0.5492	0	0	0.4363
chr1:209861796-209862620	DIEXF	chr1:210001311/+	-138691	0.33	0.79	0.69	0.54	0	0	0	0
chr1:209861796-209862620	TRAF3IP3	chr1:209929376/+	-66756	0.33	0.79	0.69	0.54	10.9839	14.0992	12.9745	11.3431
chr1:209861796-209862620	C1orf74	chr1:209957053/-	94433	0.33	0.79	0.69	0.54	73.0432	84.0731	78.3277	86.3824
chr1:209861796-209862620	LAMB3	chr1:209825819/-	-35977	0.33	0.79	0.69	0.54	793.041	725.326	474.772	797.947
chr1:209861796-209862620	HSD11B1	chr1:209859524/+	2272	0.33	0.79	0.69	0.54	5.492	0	1.4416	8.2892
chr1:62694247-62707754	USP1	chr1:62901974/+	-194220	5.23	6.8	2.17	1.02	1041.28	842.82	1894.76	3106.71
chr1:62694247-62707754	KANK4	chr1:62747305/-	39551	5.23	6.8	2.17	1.02	0	0	0	0
chr1:62694247-62707754	L1TD1	chr1:62672190/+	22057	5.23	6.8	2.17	1.02	1.6476	1.5666	0	0
chr6:159062709-159088973	TMEM181	chr6:158957467/+	105242	14.56	8.85	7.74	9.6	1871.11	1885.64	1922.63	1821.45
chr6:159062709-159088973	DYNLT1	chr6:159065817/-	0	14.56	8.85	7.74	9.6	1549.83	1707.05	1524.75	1185.8
chr6:159062709-159088973	SYTL3	chr6:159082300/+	0	14.56	8.85	7.74	9.6	302.058	113.838	120.135	257.839
chr6:159062709-159088973	EZR	chr6:159239197/-	150224	14.56	8.85	7.74	9.6	14783.3	16055.4	14033.2	12374.1
chr10:104209289-104221646	CUEDC2	chr10:104192422/-	-16867	5.6	5.61	2.74	5.24	925.946	613.055	412.302	645.687
chr10:104209289-104221646	PSD	chr10:104179690/-	-29599	5.6	5.61	2.74	5.24	3.2952	2.0888	0.9611	0
chr10:104209289-104221646	TRIM8	chr10:104404251/+	-182605	5.6	5.61	2.74	5.24	1431.21	1388.51	1051.9	994.271
chr10:104209289-104221646	TMEM180	chr10:104221169/+	0	5.6	5.61	2.74	5.24	121.922	110.183	70.1586	128.265
chr10:104209289-104221646	FBXL15	chr10:104179570/+	29719	5.6	5.61	2.74	5.24	187.825	202.611	183.566	123.466
chr10:104209289-104221646	ACTR1A	chr10:104262511/-	40865	5.6	5.61	2.74	5.24	3246.3	3528.98	3095.15	2479.79
chr10:104209289-104221646	SUFU	chr10:104263718/+	-42072	5.6	5.61	2.74	5.24	571.165	720.627	578.568	424.495
chr10:104209289-104221646	NFKB2	chr10:104155644/+	53645	5.6	5.61	2.74	5.24	1081.37	605.222	475.733	643.506
chr10:104209289-104221646	GBF1	chr10:104018685/+	190604	5.6	5.61	2.74	5.24	2940.4	4056.4	3239.31	2003.81
chr10:104209289-104221646	C10orf95	chr10:104211299/-	0	5.6	5.61	2.74	5.24	8.6993	16.893	7.7703	6.5965
chr1:200637681-200640417	CAMSAP2	chr1:200708685/+	-68268	4.78	3.98	2.55	4.67	0	0	0	0
chr1:200637681-200640417	KIF14	chr1:200589861/-	-47820	4.78	3.98	2.55	4.67	274.599	144.125	974.051	1814.03
chr1:200637681-200640417	DDX59	chr1:200639125/-	0	4.78	3.98	2.55	4.67	200.457	226.11	223.45	215.956
chr11:863381-864175	RPLP2	chr11:810233/+	53148	0.15	0.32	0.3	0.55	14711.9	15347.3	12372.9	13171.1
chr11:863381-864175	TMEM80	chr11:695590/+	167791	0.15	0.32	0.3	0.55	375.102	277.807	177.011	230.519
chr11:863381-864175	PNPLA2	chr11:819573/+	43808	0.15	0.32	0.3	0.55	4406.76	12888.8	7125.9	2006.43
chr11:863381-864175	EPS8L2	chr11:709329/+	154052	0.15	0.32	0.3	0.55	268.557	183.812	63.431	19.6324
chr11:863381-864175	PANO1	chr11:797510/+	65871	0.15	0.32	0.3	0.55	0	0	0	0
chr11:863381-864175	TALDO1	chr11:747431/+	115950	0.15	0.32	0.3	0.55	5507.35	5926.89	4488.71	3975.34
chr11:863381-864175	DEAF1	chr11:695753/-	-167628	0.15	0.32	0.3	0.55	1012.17	704.961	648.554	984.507
chr11:863381-864175	MUC6	chr11:1036705/-	172530	0.15	0.32	0.3	0.55	7.6888	4.1775	6.7275	6.5441
chr11:863381-864175	PIDD1	chr11:805249/-	-58132	0.15	0.32	0.3	0.55	0	0	0	0
chr11:863381-864175	SLC25A22	chr11:798268/-	-65113	0.15	0.32	0.3	0.55	1365.3	1150.39	2109.08	2100.23
chr11:863381-864175	CD151	chr11:836062/+	27319	0.15	0.32	0.3	0.55	9818	10073.6	7874.1	6576.41
chr11:863381-864175	PDDC1	chr11:777486/-	-85895	0.15	0.32	0.3	0.55	1393.86	1365.54	1247	1433.6
chr11:863381-864175	TSPAN4	chr11:862549/+	832	0.15	0.32	0.3	0.55	1639.9	666.841	851.514	1585.42
chr11:863381-864175	AP2A2	chr11:925808/+	-61633	0.15	0.32	0.3	0.55	2672.94	3050.65	2582.89	2013.85
chr11:863381-864175	POLR2L	chr11:842528/-	-20853	0.15	0.32	0.3	0.55	4103.6	4762.4	4443.06	3796.9
chr11:863381-864175	CEND1	chr11:790125/-	-73256	0.15	0.32	0.3	0.55	12.0823	14.6214	8.1691	4.3627
chr11:863381-864175	CRACR2B	chr11:828259/+	35122	0.15	0.32	0.3	0.55	0	0	0	0
chr11:863381-864175	CHID1	chr11:904858/-	40683	0.15	0.32	0.3	0.55	919.356	1029.24	1035.56	1068.87
chr20:10599805-10600970	SLX4IP	chr20:10438823/+	160982	0.57	0.52	0.27	0.86	0	0	0	0
chr20:10599805-10600970	MKKS	chr20:10414886/-	-184919	0.57	0.52	0.27	0.86	622.789	476.24	656.415	953.697
chr20:10599805-10600970	JAG1	chr20:10654693/-	53723	0.57	0.52	0.27	0.86	534.918	231.854	426.718	715.491
chr6:46404827-46406256	RCAN2	chr6:46424714/-	18458	1.36	0.84	0.32	0.02	19.7711	44.3864	4.3248	1.3088
chr6:46404827-46406256	CYP39A1	chr6:46605714/-	199458	1.36	0.84	0.32	0.02	49.9769	34.4648	7.2081	19.6324
chr13:44452657-44454246	ENOX1	chr13:44361115/-	-91542	2.17	1.46	0.86	1.63	59.3133	107.05	47.0927	44.9363
chr13:44452657-44454246	LACC1	chr13:44453968/+	0	2.17	1.46	0.86	1.63	0	0	0	0
chr13:44452657-44454246	CCDC122	chr13:44453825/-	0	2.17	1.46	0.86	1.63	68.6496	84.5953	41.8068	32.2843
chr16:85524388-85527024	GINS2	chr16:85722587/-	195563	5.97	4.23	0.65	0.91	124.668	47.5196	336.377	787.04
chr16:85524388-85527024	GSE1	chr16:85645028/+	-118004	5.97	4.23	0.65	0.91	0	0	0	0
chr20:50807315-50809302	ZFP64	chr20:50808523/-	0	4.13	3.15	2.4	2.86	341.601	315.927	297.934	355.128
chr2:189437147-189446121	DIRC1	chr2:189599675/-	153554	4.36	1.34	-0.28	-0.5	0.5492	0	0	0
chr2:189437147-189446121	GULP1	chr2:189342385/+	94762	4.36	1.34	-0.28	-0.5	21.9679	5.7441	2.4027	4.3627
chr4:147878019-147879044	TTC29	chr4:147867033/-	-10986	0.1	0.17	0.63	1.05	7.6888	2.611	1.9222	0.8725
chr6:131883223-131883803	ARG1	chr6:131894343/+	-10540	0.21	0.53	0.18	0.09	1.6476	0.5222	0.9611	0.8725
chr6:131883223-131883803	MED23	chr6:131949378/-	65575	0.21	0.53	0.18	0.09	857.297	964.491	772.705	617.329
chr6:131883223-131883803	ENPP3	chr6:131958441/+	-74638	0.21	0.53	0.18	0.09	5.492	0.5222	0	0
chr2:233890048-233891044	NGEF	chr2:233877950/-	-12098	0.28	1.17	0.27	0.3	16.4759	5.2219	14.4161	20.9412
chr2:233890048-233891044	C2orf82	chr2:233734993/+	155055	0.28	1.17	0.27	0.3	6.0412	8.8773	5.2859	3.0539
chr2:233890048-233891044	INPP5D	chr2:233924676/+	-33632	0.28	1.17	0.27	0.3	2.1968	0.5222	0	0
chr1:12609140-12619812	DHRS3	chr1:12677736/-	57924	5.17	3.91	1.07	1.33	258.123	80.9399	54.7814	126.084
chr1:12609140-12619812	AADACL3	chr1:12776117/+	-156305	5.17	3.91	1.07	1.33	0	0.5222	0	0
chr1:12609140-12619812	C1orf158	chr1:12806133/+	-186321	5.17	3.91	1.07	1.33	0	0	0	0
chr1:70202914-70203963	LRRC7	chr1:70225857/+	-21894	0.82	1.13	0.29	0.36	366.864	98.1723	9.1302	16.5784
chr11:8625109-8626833	ST5	chr11:8772271/-	145438	2.6	2.77	1.18	0.77	598.625	494.517	395.483	352.074
chr11:8625109-8626833	RPL27A	chr11:8703994/+	-77161	2.6	2.77	1.18	0.77	6795.76	6806.79	5814.03	6740.45
chr11:8625109-8626833	STK33	chr11:8615835/-	-9274	2.6	2.77	1.18	0.77	0.5492	1.0444	0	0
chr11:8625109-8626833	TRIM66	chr11:8673449/-	46616	2.6	2.77	1.18	0.77	224.622	324.804	245.075	179.405
chr3:179244384-179245415	ZNF639	chr3:179046070/+	198314	0.71	0.31	0.16	0.27	654.094	608.355	714.08	992.525
chr3:179244384-179245415	GNB4	chr3:179169370/-	-75014	0.71	0.31	0.16	0.27	2560.36	2218.28	3372.42	3875.43
chr3:179244384-179245415	NDUFB5	chr3:179322574/+	-77159	0.71	0.31	0.16	0.27	1435.6	1280.94	1046.61	942.79
chr3:179244384-179245415	USP13	chr3:179370932/+	-125517	0.71	0.31	0.16	0.27	722.194	546.214	731.379	1013.03
chr3:179244384-179245415	MFN1	chr3:179066632/+	177752	0.71	0.31	0.16	0.27	1139.03	1405.22	1468.04	1029.17
chr3:179244384-179245415	MRPL47	chr3:179316558/-	71143	0.71	0.31	0.16	0.27	819.951	675.196	909.178	1121.23
chr3:179244384-179245415	ACTL6A	chr3:179280667/+	-35252	0.71	0.31	0.16	0.27	931.438	1101.31	1644.88	1953.2
chr4:170885265-170908164	MFAP3L	chr4:170913459/-	5295	1.91	7.16	2.76	0.15	142.791	104.439	83.6136	112.123
chr4:170885265-170908164	AADAT	chr4:171010886/-	102722	1.91	7.16	2.76	0.15	118.077	52.7415	87.458	255.221
chr14:64904690-64912750	AKAP5	chr14:64932216/+	-19466	5.94	2.66	0.2	-0.42	81.8304	43.342	21.1437	37.5196
chr14:64904690-64912750	ZBTB1	chr14:64971291/+	-58541	5.94	2.66	0.2	-0.42	1030.96	899.149	538.981	552.83
chr14:64904690-64912750	ESR2	chr14:64805267/-	-99423	5.94	2.66	0.2	-0.42	37.8946	12.0104	6.7275	17.8873
chr14:64904690-64912750	MTHFD1	chr14:64854758/+	49932	5.94	2.66	0.2	-0.42	2529.18	1880.6	2795.64	4384.07
chr14:64904690-64912750	HSPA2	chr14:65007185/+	-94435	5.94	2.66	0.2	-0.42	144.439	88.7728	24.0269	22.25
chr14:64904690-64912750	PPP1R36	chr14:65016619/+	-103869	5.94	2.66	0.2	-0.42	0	0	0	0
chr14:64904690-64912750	ZBTB25	chr14:64957257/-	44507	5.94	2.66	0.2	-0.42	158.471	172.209	136.78	119.099
chr10:61468718-61470018	SLC16A9	chr10:61469648/-	0	0.6	0.48	0.63	1.15	59.8625	12.0104	18.741	70.6765
chr10:61468718-61470018	MRLN	chr10:61496977/-	26959	0.6	0.48	0.63	1.15	0	0	0	0
chr10:61468718-61470018	CCDC6	chr10:61666413/-	196395	0.6	0.48	0.63	1.15	3967.95	3266.84	2863.05	2954.89
chr16:122487-129125	HBM	chr16:215972/+	-86847	6.62	3.51	3.67	5.33	0	0	0	0
chr16:122487-129125	MPG	chr16:127017/+	0	6.62	3.51	3.67	5.33	1048.42	1184.86	1017.78	619.51
chr16:122487-129125	ITFG3	chr16:284544/+	-155419	6.62	3.51	3.67	5.33	2033.68	4519.58	2600.67	769.589
chr16:122487-129125	RGS11	chr16:323835/-	194710	6.62	3.51	3.67	5.33	1.0984	0	0	0.8725
chr16:122487-129125	HBQ1	chr16:230332/+	-101207	6.62	3.51	3.67	5.33	0	0.5222	0	0
chr16:122487-129125	SNRNP25	chr16:103828/+	18659	6.62	3.51	3.67	5.33	357.527	536.815	637.194	567.157
chr16:122487-129125	RHBDF1	chr16:122628/-	0	6.62	3.51	3.67	5.33	788.098	1151.44	756.367	312.809
chr16:122487-129125	HBZ	chr16:202853/+	-73728	6.62	3.51	3.67	5.33	0	0	0	0
chr16:122487-129125	HBA1	chr16:226649/+	-97524	6.62	3.51	3.67	5.33	18.6727	60.0522	25.9491	20.5049
chr16:122487-129125	HBA2	chr16:222845/+	-93720	6.62	3.51	3.67	5.33	0	0	0	0
chr16:122487-129125	LUC7L	chr16:279448/-	150323	6.62	3.51	3.67	5.33	598.625	884.595	945.219	841.138
chr16:122487-129125	POLR3K	chr16:103631/-	-18856	6.62	3.51	3.67	5.33	197.162	135.77	315.714	577.192
chr16:122487-129125	NPRL3	chr16:162773/-	33648	6.62	3.51	3.67	5.33	974.276	765.535	877.943	1200.19
chr12:45677505-45690634	ANO6	chr12:45686465/+	0	5.53	4.41	1.5	1.03	2818.48	2744.65	1993.27	1804.43
chr6:22470423-22472093	PRL	chr6:22303081/-	-167342	1.91	1.89	0.7	1.37	0	0	0	0
chr6:22470423-22472093	HDGFL1	chr6:22569677/+	-97584	1.91	1.89	0.7	1.37	0	0	0	0
chr5:66688240-66702276	CD180	chr5:66492616/-	-195624	4.75	-1.89	-2.44	7.31	27.4599	3.6554	0	3.9265
chr9:80892752-80913010	PSAT1	chr9:80911990/+	0	4.75	4.5	1.56	1.8	1798.62	1161.88	1797.21	2487.64
chr9:80892752-80913010	CEP78	chr9:80850990/+	41762	4.75	4.5	1.56	1.8	478.9	578.068	1011.05	1029.17
chr11:61811793-61822674	INCENP	chr11:61891444/+	-68770	1.91	4.59	3.52	-0.04	419.587	267.363	1110.52	1858.97
chr11:61811793-61822674	RAB3IL1	chr11:61687740/-	-124053	1.91	4.59	3.52	-0.04	40.0914	8.8773	19.7021	128.265
chr11:61811793-61822674	SCGB1D1	chr11:61957709/+	-135035	1.91	4.59	3.52	-0.04	0	0	0	0
chr11:61811793-61822674	SCGB1D2	chr11:62009723/+	-187049	1.91	4.59	3.52	-0.04	0	0	0	0
chr11:61811793-61822674	SCGB2A1	chr11:61976139/+	-153465	1.91	4.59	3.52	-0.04	0	0	0	0
chr11:61811793-61822674	BEST1	chr11:61722578/+	89215	1.91	4.59	3.52	-0.04	19.7766	9.3995	3.8443	2.6176
chr11:61811793-61822674	FTH1	chr11:61735131/-	-76662	1.91	4.59	3.52	-0.04	40074.4	90117.5	56039.4	20358.3
chr11:61811793-61822674	FADS3	chr11:61659016/-	-152777	1.91	4.59	3.52	-0.04	2202.28	2095.04	903.412	631.29
chr1:1259526-1296803	MRPL20	chr1:1342692/-	45889	13.95	7.12	14.19	10.32	895.636	718.971	956.218	1307.74
chr1:1259526-1296803	UBE2J2	chr1:1209233/-	-50293	13.95	7.12	14.19	10.32	1161	959.791	1146.08	1374.27
chr1:1259526-1296803	FAM132A	chr1:1182101/-	-77425	13.95	7.12	14.19	10.32	4.9428	14.0992	11.5329	1.7451
chr1:1259526-1296803	PUSL1	chr1:1243993/+	15533	13.95	7.12	14.19	10.32	276.246	272.841	399.616	360.642
chr1:1259526-1296803	TNFRSF18	chr1:1142088/-	-117438	13.95	7.12	14.19	10.32	0	0	0	0
chr1:1259526-1296803	SDF4	chr1:1167446/-	-92080	13.95	7.12	14.19	10.32	4631.93	4189.56	2959.63	3137.69
chr1:1259526-1296803	AURKAIP1	chr1:1310169/-	13366	13.95	7.12	14.19	10.32	1121.46	1038.64	1378.66	1677.48
chr1:1259526-1296803	SCNN1D	chr1:1215815/+	43711	13.95	7.12	14.19	10.32	21.9679	21.9321	8.6497	3.0539
chr1:1259526-1296803	TTLL10	chr1:1115413/+	144113	13.95	7.12	14.19	10.32	0.5492	0	0	0
chr1:1259526-1296803	TNFRSF4	chr1:1149547/-	-109979	13.95	7.12	14.19	10.32	1.0984	0.5222	0.4805	0
chr1:1259526-1296803	CPSF3L	chr1:1260066/-	0	13.95	7.12	14.19	10.32	1216.96	1300.27	1448.05	1420.26
chr1:1259526-1296803	B3GALT6	chr1:1167628/+	91898	13.95	7.12	14.19	10.32	512.401	456.919	389.716	509.133
chr1:1259526-1296803	CCNL2	chr1:1334717/-	37914	13.95	7.12	14.19	10.32	1915.6	1468.93	1235.94	1574.08
chr1:1259526-1296803	ATAD3C	chr1:1385068/+	-88265	13.95	7.12	14.19	10.32	51.4872	1.6084	13.186	64.8043
chr1:1259526-1296803	ATAD3B	chr1:1407163/+	-110360	13.95	7.12	14.19	10.32	456.85	352.402	701.73	1499.43
chr1:1259526-1296803	ATAD3A	chr1:1447522/+	-150719	13.95	7.12	14.19	10.32	1056.87	889.332	2025.59	2583.86
chr1:1259526-1296803	CPTP	chr1:1262215/+	0	13.95	7.12	14.19	10.32	0	0	0	0
chr1:1259526-1296803	TMEM240	chr1:1475739/-	178936	13.95	7.12	14.19	10.32	0	0	0	0
chr1:1259526-1296803	ACAP3	chr1:1243268/-	-16258	13.95	7.12	14.19	10.32	1218.73	1822.18	1351.76	665.725
chr1:1259526-1296803	MXRA8	chr1:1293926/-	0	13.95	7.12	14.19	10.32	366.314	59.53	29.7934	34.4657
chr1:1259526-1296803	VWA1	chr1:1370902/+	-74099	13.95	7.12	14.19	10.32	32.4026	30.8094	25.4685	12.652
chr1:1259526-1296803	DVL1	chr1:1284491/-	0	13.95	7.12	14.19	10.32	1404.3	1384.33	2152.33	2201.01
chr1:1259526-1296803	ANKRD65	chr1:1356823/-	60020	13.95	7.12	14.19	10.32	0	0	0	0
chr17:48937295-48946471	WFIKKN2	chr17:48912604/+	24691	19.58	16.41	5.6	5.36	0	0	0	0
chr17:48937295-48946471	TOB1	chr17:48941523/-	0	19.58	16.41	5.6	5.36	2036.08	2975.98	1108.87	696.386
chr17:48937295-48946471	ANKRD40	chr17:48785269/-	-152026	19.58	16.41	5.6	5.36	1513.59	1213.58	1382.51	1697.11
chr17:48937295-48946471	LUC7L3	chr17:48796925/+	140370	19.58	16.41	5.6	5.36	2590.01	2964.49	2616.53	2628.56
chr17:48937295-48946471	SPAG9	chr17:49124328/-	177857	19.58	16.41	5.6	5.36	3436.33	4645.43	4710.24	2926.53
chr6:7697239-7699219	BMP6	chr6:7727010/+	-27791	3.39	3.21	2.28	1.8	7.8975	2.6945	5.4349	9.4017
chr6:7697239-7699219	SNRNP48	chr6:7590431/+	106808	3.39	3.21	2.28	1.8	673.865	710.183	773.186	908.761
chr6:7697239-7699219	DSP	chr6:7541869/+	155370	3.39	3.21	2.28	1.8	542.607	425.065	238.347	247.804
chr12:115244328-115251695	TBX3	chr12:115121968/-	-122360	2.15	0.37	0.59	0.97	1017.11	1308.09	1092.74	1216.77
chr1:1617458-1618467	NADK	chr1:1690080/-	71613	0.98	1.15	0.52	0.26	1793.68	2396.87	2235.94	1592.4
chr1:1617458-1618467	ATAD3A	chr1:1451391/+	166067	0.98	1.15	0.52	0.26	1056.87	889.332	2025.59	2583.86
chr1:1617458-1618467	TMEM240	chr1:1475739/-	-141719	0.98	1.15	0.52	0.26	0	0	0	0
chr1:1617458-1618467	GNB1	chr1:1736019/-	117552	0.98	1.15	0.52	0.26	10711	10389	9417.59	9630.77
chr1:1617458-1618467	C1orf233	chr1:1535475/-	-81983	0.98	1.15	0.52	0.26	0	0	0	0
chr1:1617458-1618467	CDK11B	chr1:1647916/-	29449	0.98	1.15	0.52	0.26	751.576	898.423	917.698	1169.95
chr1:1617458-1618467	CDK11A	chr1:1654269/-	35802	0.98	1.15	0.52	0.26	862.025	846.486	846.607	688.564
chr1:1617458-1618467	SSU72	chr1:1510261/-	-107197	0.98	1.15	0.52	0.26	1653.63	1626.63	1840.46	2174.83
chr1:1617458-1618467	MIB2	chr1:1558810/+	58648	0.98	1.15	0.52	0.26	239.999	354.569	161.461	96.853
chr1:1617458-1618467	SLC35E2	chr1:1671142/-	52675	0.98	1.15	0.52	0.26	132.098	130.668	51.4945	52.2177
chr1:1617458-1618467	SLC35E2B	chr1:1622831/-	4364	0.98	1.15	0.52	0.26	0	0	0	0
chr1:1617458-1618467	MMP23B	chr1:1567559/+	49899	0.98	1.15	0.52	0.26	8.238	3.6554	0.9611	0
chr1:29240643-29241651	YTHDF2	chr1:29068914/+	171729	0.6	0.84	0.39	0.42	2040.82	2245.43	2174.44	2480.66
chr1:29240643-29241651	OPRD1	chr1:29138653/+	101990	0.6	0.84	0.39	0.42	0	0	0	0
chr1:29240643-29241651	EPB41	chr1:29241087/+	0	0.6	0.84	0.39	0.42	1459.07	1212.38	970.529	1251.76
chr3:136702883-136716565	SLC35G2	chr3:136573284/+	129599	8.24	9.02	4.81	5.68	0	0	0	0
chr3:136702883-136716565	IL20RB	chr3:136676706/+	26177	8.24	9.02	4.81	5.68	1461.96	1058.49	237.866	505.206
chr3:136702883-136716565	NCK1	chr3:136649316/+	53567	8.24	9.02	4.81	5.68	670.02	725.326	571.36	562.358
chr14:52542736-52544006	PTGDR	chr14:52734430/+	-190424	1.44	1.06	0.71	0.38	0	0	0	0
chr14:52542736-52544006	C14orf166	chr14:52456227/+	86509	1.44	1.06	0.71	0.38	1570.15	1437.08	1357.04	1787.85
chr14:52542736-52544006	GNG2	chr14:52417367/+	125369	1.44	1.06	0.71	0.38	344.896	185.379	96.1076	128.701
chr14:52542736-52544006	NID2	chr14:52535945/-	-6791	1.44	1.06	0.71	0.38	23.0663	10.4439	11.0524	13.0882
chr1:805090-805677	KLHL17	chr1:895966/+	-90289	0.18	0.4	0.15	0.15	220.777	160.835	239.308	353.383
chr1:805090-805677	PLEKHN1	chr1:901876/+	-96199	0.18	0.4	0.15	0.15	126.865	76.7624	97.5493	117.358
chr1:805090-805677	PERM1	chr1:916426/-	110749	0.18	0.4	0.15	0.15	0	0	0	0
chr1:805090-805677	NOC2L	chr1:894678/-	89001	0.18	0.4	0.15	0.15	2622.05	2797.63	4774.56	5305.08
chr1:805090-805677	AGRN	chr1:955502/+	-149825	0.18	0.4	0.15	0.15	5879.15	7938.9	4948.58	2409.55
chr1:805090-805677	ISG15	chr1:948846/+	-143169	0.18	0.4	0.15	0.15	246.589	222.454	112.446	82.456
chr1:805090-805677	SAMD11	chr1:861120/+	-55443	0.18	0.4	0.15	0.15	278.811	229.525	59.654	54.9925
chr1:805090-805677	HES4	chr1:935551/-	129874	0.18	0.4	0.15	0.15	190.571	103.394	156.655	215.084
chr6:105443640-105445037	BVES	chr6:105581462/-	136425	3.9	1.42	0.14	2.5	51.6245	40.7311	24.0269	10.4706
chr6:105443640-105445037	POPDC3	chr6:105610034/-	164997	3.9	1.42	0.14	2.5	29.1074	18.799	33.1571	30.5392
chr6:105443640-105445037	HACE1	chr6:105307793/-	-135847	3.9	1.42	0.14	2.5	276.795	254.83	236.425	253.912
chr6:105443640-105445037	LIN28B	chr6:105404922/+	38718	3.9	1.42	0.14	2.5	0.5492	0	0	3.4902
chr5:156975227-156976227	SOX30	chr5:157079427/-	103200	0.39	0.97	0.22	0.07	1.6476	5.7441	3.3638	0.4363
chr5:156975227-156976227	NIPAL4	chr5:156887026/+	88201	0.39	0.97	0.22	0.07	0	0	0	0
chr5:156975227-156976227	THG1L	chr5:157158322/+	-182095	0.39	0.97	0.22	0.07	250.983	263.708	308.025	299.721
chr5:156975227-156976227	LSM11	chr5:157170702/+	-194475	0.39	0.97	0.22	0.07	224.072	135.248	193.657	404.427
chr5:156975227-156976227	ADAM19	chr5:157002830/-	26603	0.39	0.97	0.22	0.07	171.35	94.517	44.6901	45.8089
chr5:156975227-156976227	C5orf52	chr5:157098560/+	-122333	0.39	0.97	0.22	0.07	0	0	0	0
chr20:51686937-51699178	TSHZ2	chr20:51588945/+	97992	4.86	5.56	5.89	4.6	202.105	106.005	31.7155	23.1226
chr12:50783193-50797551	LIMA1	chr12:50677352/-	-105841	9.67	7.44	6.94	10.16	3549.46	3019.84	3288.32	2197.52
chr12:50783193-50797551	DIP2B	chr12:50898767/+	-101216	9.67	7.44	6.94	10.16	1241.73	1455.87	1312.83	1031.35
chr12:50783193-50797551	LARP4	chr12:50794591/+	0	9.67	7.44	6.94	10.16	3272.67	2932.64	3358.48	3790.36
chr12:50783193-50797551	FAM186A	chr12:50790404/-	0	9.67	7.44	6.94	10.16	0.5492	3.1332	1.9222	0.8725
chr17:79091834-79094250	C17orf89	chr17:79213110/+	-118860	0.71	1.91	2.12	0.85	236.704	212.533	257.088	333.314
chr17:79091834-79094250	CEP131	chr17:79193872/-	99622	0.71	1.91	2.12	0.85	0	0	0	0
chr17:79091834-79094250	ENTHD2	chr17:79212890/-	118640	0.71	1.91	2.12	0.85	0	0	0	0
chr17:79091834-79094250	SLC38A10	chr17:79269138/-	174888	0.71	1.91	2.12	0.85	2023.24	2549.35	1735.7	1051.42
chr17:79091834-79094250	BAIAP2	chr17:79008946/+	82888	0.71	1.91	2.12	0.85	1394.85	2425.52	1760.14	806.55
chr17:79091834-79094250	AATK	chr17:79105004/-	10754	0.71	1.91	2.12	0.85	25.9276	22.517	12.0807	12.3379
chr17:79091834-79094250	CHMP6	chr17:78965640/+	126194	0.71	1.91	2.12	0.85	506.909	323.76	314.752	401.373
chr17:79091834-79094250	TMEM105	chr17:79288280/-	194030	0.71	1.91	2.12	0.85	1.0984	1.0444	0	0.4363
chr3:196668137-196670210	MFI2	chr3:196756685/-	86475	2.48	1.59	1.91	3.1	12.0823	12.0104	4.8054	2.6176
chr3:196668137-196670210	PIGZ	chr3:196695741/-	25531	2.48	1.59	1.91	3.1	45.0342	34.4648	17.2994	3.0539
chr3:196668137-196670210	SENP5	chr3:196612021/+	56116	2.48	1.59	1.91	3.1	969.333	1021.41	1005.77	995.579
chr3:196668137-196670210	PAK2	chr3:196509496/+	158641	2.48	1.59	1.91	3.1	3171.06	3782.25	4700.62	3698.74
chr3:196668137-196670210	NCBP2	chr3:196669463/-	0	2.48	1.59	1.91	3.1	1530.06	1662.14	1824.12	1735.94
chr3:101497258-101500513	NFKBIZ	chr3:101546833/+	-46320	3.21	2.36	1.71	1.41	199.688	168.193	130.966	100.483
chr3:101497258-101500513	RPL24	chr3:101405562/-	-91696	3.21	2.36	1.71	1.41	3101.32	3281.46	3155.69	3808.68
chr3:101497258-101500513	ZBTB11	chr3:101395987/-	-101271	3.21	2.36	1.71	1.41	990.334	1432.17	1453.32	1143.97
chr3:101497258-101500513	NXPE3	chr3:101498028/+	0	3.21	2.36	1.71	1.41	0	0	0	0
chr3:101497258-101500513	CEP97	chr3:101443436/+	53822	3.21	2.36	1.71	1.41	336.658	303.394	401.249	462.015
chr1:167868218-167869442	GPR161	chr1:168066469/-	197027	1.38	0.8	-0.07	-0.04	111.487	61.6188	42.2874	46.6814
chr1:167868218-167869442	MPC2	chr1:167905135/-	35693	1.38	0.8	-0.07	-0.04	0	0	0	0
chr1:167868218-167869442	DCAF6	chr1:167905796/+	-36354	1.38	0.8	-0.07	-0.04	2443.38	2732.64	1354.64	961.55
chr1:167868218-167869442	ADCY10	chr1:167868865/-	0	1.38	0.8	-0.07	-0.04	1.6476	1.0444	0	0.8725
chr1:167868218-167869442	MPZL1	chr1:167691186/+	177032	1.38	0.8	-0.07	-0.04	4669.27	4890.86	3833.25	3118.49
chr16:20894658-20930686	THUMPD1	chr16:20753285/-	-141373	15.44	9.52	5.54	15.01	1062.15	999.478	1085.06	1416.15
chr16:20894658-20930686	ACSM1	chr16:20702577/-	-192081	15.44	9.52	5.54	15.01	0	0	0	0.4363
chr16:20894658-20930686	ACSM3	chr16:20781305/+	113353	15.44	9.52	5.54	15.01	1.6476	1.2324	3.5512	2.7791
chr16:20894658-20930686	ERI2	chr16:20817794/-	-76864	15.44	9.52	5.54	15.01	310.296	235.843	307.838	513.334
chr16:20894658-20930686	LOC81691	chr16:20818273/+	76385	15.44	9.52	5.54	15.01	64.2561	20.8877	56.223	134.373
chr16:20894658-20930686	LYRM1	chr16:20911619/+	0	15.44	9.52	5.54	15.01	385.536	343.603	284.959	413.152
chr16:20894658-20930686	DCUN1D3	chr16:20911560/-	0	15.44	9.52	5.54	15.01	571.165	645.431	478.135	340.731
chr3:150186890-150188245	SELT	chr3:150321065/+	-132820	0.64	1.63	0.79	0.76	1659.12	1879.37	2185.49	1712.82
chr3:150186890-150188245	SERP1	chr3:150264427/-	76182	0.64	1.63	0.79	0.76	3311.66	2777.85	2923.14	3136.59
chr3:150186890-150188245	TSC22D2	chr3:150126121/+	60769	0.64	1.63	0.79	0.76	495.925	854.83	1013.46	641.324
chr3:150186890-150188245	EIF2A	chr3:150264573/+	-76328	0.64	1.63	0.79	0.76	2585.62	2067.36	2278.71	3036.04
chr12:56842284-56843955	ANKRD52	chr12:56652142/-	-190142	1.29	0.92	0.75	2.41	4215.64	4954.57	5283.52	4613.17
chr12:56842284-56843955	APOF	chr12:56756582/-	-85702	1.29	0.92	0.75	2.41	0.5492	2.611	1.4416	0.4363
chr12:56842284-56843955	MIP	chr12:56848434/-	4479	1.29	0.92	0.75	2.41	1.0984	0	1.9222	0.8725
chr12:56842284-56843955	STAT2	chr12:56754036/-	-88248	1.29	0.92	0.75	2.41	2374.18	1394.78	445.94	316.736
chr12:56842284-56843955	IL23A	chr12:56732662/+	109622	1.29	0.92	0.75	2.41	6.5904	6.7885	3.8443	0.8725
chr12:56842284-56843955	PAN2	chr12:56727836/-	-114448	1.29	0.92	0.75	2.41	699.677	446.475	408.938	603.804
chr12:56842284-56843955	RBMS2	chr12:56915608/+	-71653	1.29	0.92	0.75	2.41	3004.89	2670.51	2168.36	2106.43
chr12:56842284-56843955	TIMELESS	chr12:56843199/-	0	1.29	0.92	0.75	2.41	753.498	1092.43	2111.48	1978.07
chr12:56842284-56843955	COQ10A	chr12:56661066/+	181218	1.29	0.92	0.75	2.41	137.299	145.692	135.512	101.652
chr12:56842284-56843955	SPRYD4	chr12:56862300/+	-18345	1.29	0.92	0.75	2.41	236.155	140.992	126.382	241.26
chr12:56842284-56843955	CNPY2	chr12:56710127/-	-132157	1.29	0.92	0.75	2.41	1028.65	681.462	678.039	979.874
chr12:56842284-56843955	ATP5B	chr12:57039851/-	195896	1.29	0.92	0.75	2.41	17269.5	18964	15713.6	15191.5
chr12:56842284-56843955	CS	chr12:56694174/-	-148110	1.29	0.92	0.75	2.41	6331.69	6863.19	7552.62	7624.34
chr12:56842284-56843955	BAZ2A	chr12:57011315/-	167360	1.29	0.92	0.75	2.41	2195.45	2362.39	2642.79	2331.36
chr12:56842284-56843955	GLS2	chr12:56869465/-	25510	1.29	0.92	0.75	2.41	2.746	3.1332	2.4027	3.0539
chr4:8395286-8405502	ACOX3	chr4:8418261/-	12759	1.36	0.96	0.23	0.01	601.371	643.864	397.886	249.986
chr4:8395286-8405502	SH3TC1	chr4:8206893/+	188393	1.36	0.96	0.23	0.01	671.119	484.073	328.208	359.491
chr4:8395286-8405502	CPZ	chr4:8594386/+	-188884	1.36	0.96	0.23	0.01	8.238	4.6997	0.4805	6.9804
chr4:8395286-8405502	TRMT44	chr4:8442531/+	-37029	1.36	0.96	0.23	0.01	0	0	0	0
chr4:8395286-8405502	GPR78	chr4:8582216/+	-176714	1.36	0.96	0.23	0.01	0	0	0	0
chr4:8395286-8405502	HTRA3	chr4:8271491/+	123795	1.36	0.96	0.23	0.01	5349.73	8390.6	2424.32	1287.88
chr12:54751955-54766359	COPZ1	chr12:54734246/+	17709	4.89	4.51	1.35	3.32	3039.26	2979.63	2529.07	2367.23
chr12:54751955-54766359	SMUG1	chr12:54582777/-	-169178	4.89	4.51	1.35	3.32	381.143	355.091	327.247	299.721
chr12:54751955-54766359	NCKAP1L	chr12:54891494/+	-125135	4.89	4.51	1.35	3.32	2.1968	0.5222	0	0.8725
chr12:54751955-54766359	PDE1B	chr12:54943176/+	-176817	4.89	4.51	1.35	3.32	11.5331	4.6997	0.9611	0.8725
chr12:54751955-54766359	ZNF385A	chr12:54778347/-	11988	4.89	4.51	1.35	3.32	19.2219	18.2768	20.6631	12.652
chr12:54751955-54766359	HNRNPA1	chr12:54674487/+	77468	4.89	4.51	1.35	3.32	13860.6	12419.3	14429.6	19543.4
chr12:54751955-54766359	ITGA5	chr12:54813049/-	46690	4.89	4.51	1.35	3.32	6936.36	9488.25	7447.86	5284.6
chr12:54751955-54766359	NFE2	chr12:54694820/-	-57135	4.89	4.51	1.35	3.32	19.2219	3.1332	0	0.4363
chr12:54751955-54766359	GTSF1	chr12:54865060/-	98701	4.89	4.51	1.35	3.32	0.5492	2.611	0	0.4363
chr12:54751955-54766359	CBX5	chr12:54673914/-	-78041	4.89	4.51	1.35	3.32	5371.15	7403.66	8305.14	6133.59
chr12:54751955-54766359	GPR84	chr12:54757642/-	0	4.89	4.51	1.35	3.32	0	0	0	0
chr10:8194565-8194953	GATA3	chr10:8097249/+	97316	0.05	0.19	0.34	0.07	391.577	389.556	97.5493	120.412
chr19:57900479-57901909	ZNF543	chr19:57831864/+	68615	1.81	1.02	0.4	0.26	138.947	161.875	124.017	100.007
chr19:57900479-57901909	ZNF772	chr19:57988937/-	87028	1.81	1.02	0.4	0.26	252.631	196.345	172.033	138.299
chr19:57900479-57901909	ZNF304	chr19:57865092/+	35387	1.81	1.02	0.4	0.26	299.312	277.807	199.904	241.26
chr19:57900479-57901909	ZNF550	chr19:58071230/-	169321	1.81	1.02	0.4	0.26	139.474	127.901	112.417	99.0344
chr19:57900479-57901909	ZNF749	chr19:57946692/+	-44783	1.81	1.02	0.4	0.26	69.748	81.9843	111.004	128.701
chr19:57900479-57901909	ZIK1	chr19:58095627/+	-193718	1.81	1.02	0.4	0.26	0	0.5222	0.4805	0
chr19:57900479-57901909	ZNF264	chr19:57702867/+	197612	1.81	1.02	0.4	0.26	473.748	749.739	672.754	356.694
chr19:57900479-57901909	ZNF547	chr19:57879911/+	20568	1.81	1.02	0.4	0.26	21.188	36.6684	27.0014	26.6957
chr19:57900479-57901909	VN1R1	chr19:57968106/-	66197	1.81	1.02	0.4	0.26	2.1968	7.8329	3.8443	2.6176
chr19:57900479-57901909	ZNF805	chr19:57764440/+	136039	1.81	1.02	0.4	0.26	241.306	208.491	182.566	205.128
chr19:57900479-57901909	ZNF419	chr19:57999078/+	-97169	1.81	1.02	0.4	0.26	129.275	133.206	57.0879	49.8662
chr19:57900479-57901909	AURKC	chr19:57743109/+	157370	1.81	1.02	0.4	0.26	2.1968	1.0444	4.8054	4.3627
chr19:57900479-57901909	ZNF773	chr19:58011221/+	-109312	1.81	1.02	0.4	0.26	116.216	133.635	106.295	81.0163
chr19:57900479-57901909	ZNF416	chr19:58090242/-	188333	1.81	1.02	0.4	0.26	63.1577	58.4856	54.7814	55.4069
chr19:57900479-57901909	ZNF460	chr19:57791852/+	108627	1.81	1.02	0.4	0.26	175.743	168.146	215.281	200.25
chr19:57900479-57901909	ZNF17	chr19:57922528/+	-20619	1.81	1.02	0.4	0.26	118.077	112.794	109.082	118.667
chr19:57900479-57901909	ZNF549	chr19:58038692/+	-136783	1.81	1.02	0.4	0.26	91.1997	85.6762	68.7458	63.2599
chr19:57900479-57901909	ZNF548	chr19:57901217/+	0	1.81	1.02	0.4	0.26	177.391	137.337	97.5493	133.5
chr4:69331841-69332543	YTHDC1	chr4:69215823/-	-116018	0.04	0.35	0.47	0.19	1452.63	1654.83	1385.39	1575.39
chr4:69331841-69332543	UGT2B17	chr4:69434244/-	101701	0.04	0.35	0.47	0.19	0	0	0	0
chr4:69331841-69332543	TMPRSS11E	chr4:69313166/+	18675	0.04	0.35	0.47	0.19	0	0	0	0
chr10:97226626-97240078	SORBS1	chr10:97250876/-	10798	13.04	7.96	1.02	0.31	703.521	1132.64	198.943	41.0098
chr10:97226626-97240078	ALDH18A1	chr10:97413161/-	173083	13.04	7.96	1.02	0.31	2327.5	2090.34	2535.32	2977.58
chr10:97226626-97240078	PDLIM1	chr10:97050904/-	-175722	13.04	7.96	1.02	0.31	3365.48	2985.38	1698.22	1968.47
chr15:37338745-37339957	MEIS2	chr15:37390399/-	50442	1.38	1.08	0.46	0.24	380.044	198.956	214.32	425.368
chr4:169616148-169645091	PALLD	chr4:169602482/+	13666	17.56	9.85	2.34	3	20317.3	15505	2851.03	3747.89
chr7:137762346-137784649	CREB3L2	chr7:137686846/-	-75500	3.68	2.89	1.2	-0.16	2655.37	2334.2	2407.98	1891.69
chr7:137762346-137784649	LOC100130880	chr7:137638093/+	124253	3.68	2.89	1.2	-0.16	0	0	0	0
chr7:137762346-137784649	AKR1D1	chr7:137761177/+	1169	3.68	2.89	1.2	-0.16	0	0	0	0
chr19:10443697-10444810	ZGLP1	chr19:10420232/-	-23465	0.47	0.65	0.63	0.85	6.8485	6.2663	6.9053	13.9128
chr19:10443697-10444810	RAVER1	chr19:10444313/-	0	0.47	0.65	0.63	0.85	1577.29	2256.92	3096.59	3132.02
chr19:10443697-10444810	S1PR2	chr19:10341947/-	-101750	0.47	0.65	0.63	0.85	112.585	35.5091	24.5074	60.6422
chr19:10443697-10444810	DNMT1	chr19:10305754/-	-137943	0.47	0.65	0.63	0.85	1812.9	2023.5	5210.48	6265.78
chr19:10443697-10444810	MRPL4	chr19:10362821/+	80876	0.47	0.65	0.63	0.85	1177.48	923.76	1555.98	2163.49
chr19:10443697-10444810	S1PR5	chr19:10625704/-	180894	0.47	0.65	0.63	0.85	3.2952	0	0.9611	3.4902
chr19:10443697-10444810	CDC37	chr19:10514270/-	69460	0.47	0.65	0.63	0.85	3740.58	4361.88	4542.05	4945.18
chr19:10443697-10444810	KEAP1	chr19:10610755/-	165945	0.47	0.65	0.63	0.85	1208.78	982.768	958.674	1410.48
chr19:10443697-10444810	ICAM5	chr19:10400654/+	43043	0.47	0.65	0.63	0.85	17.0251	5.7441	13.9356	25.3039
chr19:10443697-10444810	ICAM4	chr19:10397642/+	46055	0.47	0.65	0.63	0.85	0	0.5222	1.9222	1.3088
chr19:10443697-10444810	ICAM3	chr19:10450344/-	5534	0.47	0.65	0.63	0.85	105.995	75.1958	112.446	145.716
chr19:10443697-10444810	ICAM1	chr19:10381516/+	62181	0.47	0.65	0.63	0.85	225.72	44.9086	78.3277	154.878
chr19:10443697-10444810	PDE4A	chr19:10527448/+	-82638	0.47	0.65	0.63	0.85	491.531	296.606	432.004	664.447
chr19:10443697-10444810	FDX1L	chr19:10426690/-	-17007	0.47	0.65	0.63	0.85	164.501	121.149	159.841	202.916
chr19:10443697-10444810	TYK2	chr19:10489101/-	44291	0.47	0.65	0.63	0.85	1241.19	1145.69	1060.55	1056.22
chr17:30770863-30772658	PSMD11	chr17:30771480/+	0	1.63	1.28	1.31	1.62	1598.16	1500.78	2320.04	2829.68
chr17:30770863-30772658	CDK5R1	chr17:30814104/+	-41446	1.63	1.28	1.31	1.62	269.107	248.042	237.386	307.574
chr17:30770863-30772658	RHBDL3	chr17:30593194/+	177669	1.63	1.28	1.31	1.62	1.6476	4.1775	3.3638	4.799
chr17:30770863-30772658	C17orf75	chr17:30669227/-	-101636	1.63	1.28	1.31	1.62	187.825	148.825	171.072	234.28
chr17:30770863-30772658	ZNF207	chr17:30677156/+	93707	1.63	1.28	1.31	1.62	3767.49	3616.19	3869.29	4963.5
chr8:38560550-38593844	TACC1	chr8:38585703/+	0	23.95	7.94	1.51	0.73	1963.93	2066.84	3512.25	2964.49
chr8:38560550-38593844	C8orf86	chr8:38386179/-	-174371	23.95	7.94	1.51	0.73	0.5492	0	0	0
chr8:38560550-38593844	PLEKHA2	chr8:38758752/+	-164908	23.95	7.94	1.51	0.73	4641.26	3206.27	2003.36	2425.25
chr13:48784119-48784843	ITM2B	chr13:48807273/+	-22430	-0.19	0.21	0.57	-0.07	2828.36	3360.31	1806.34	1177.94
chr13:48784119-48784843	RB1	chr13:48877882/+	-93039	-0.19	0.21	0.57	-0.07	2109.47	2444.39	2598.75	2403.44
chr13:48784119-48784843	MED4	chr13:48669276/-	-114843	-0.19	0.21	0.57	-0.07	674.414	612.533	635.271	804.927
chr13:48784119-48784843	NUDT15	chr13:48611702/+	172417	-0.19	0.21	0.57	-0.07	433.569	540.339	1197.73	964.486
chr15:36699527-36700682	C15orf41	chr15:36871803/+	-171121	0.37	0.91	0.78	0.97	194.416	145.692	152.331	215.956
chr2:31782631-31784669	SRD5A2	chr2:31806039/-	21370	2.49	1.42	0.6	0.98	0.5492	0	0	0.4363
chr2:31782631-31784669	XDH	chr2:31637610/-	-145021	2.49	1.42	0.6	0.98	32.4026	15.1436	10.0913	36.2108
chr22:38054006-38055507	GGA1	chr22:38014454/+	39552	0.58	0.11	0.72	1.14	492.63	488.773	517.059	562.795
chr22:38054006-38055507	H1F0	chr22:38201113/+	-145606	0.58	0.11	0.72	1.14	1403.75	3203.66	4335.9	1972.84
chr22:38054006-38055507	EIF3L	chr22:38245378/+	-189871	0.58	0.11	0.72	1.14	4662.68	5243.86	4888.03	4645.46
chr22:38054006-38055507	TRIOBP	chr22:38092994/+	-37487	0.58	0.11	0.72	1.14	1393.86	523.76	629.27	718.514
chr22:38054006-38055507	ANKRD54	chr22:38240352/-	184845	0.58	0.11	0.72	1.14	311.395	298.695	469.486	441.51
chr22:38054006-38055507	CDC42EP1	chr22:37962078/+	91928	0.58	0.11	0.72	1.14	874.871	321.149	528.592	1359.87
chr22:38054006-38055507	CARD10	chr22:37915209/-	-138797	0.58	0.11	0.72	1.14	241.097	136.815	123.498	226.863
chr22:38054006-38055507	GALR3	chr22:38219388/+	-163881	0.58	0.11	0.72	1.14	0.5492	2.0888	0	0.4363
chr22:38054006-38055507	SH3BP1	chr22:38035683/+	18323	0.58	0.11	0.72	1.14	266.449	110.83	157.174	348.431
chr22:38054006-38055507	MFNG	chr22:37882477/-	-171529	0.58	0.11	0.72	1.14	0	0	0.4805	0
chr22:38054006-38055507	LGALS2	chr22:37976023/-	-77983	0.58	0.11	0.72	1.14	0	2.611	0.4805	1.7451
chr22:38054006-38055507	PDXP	chr22:38054736/+	0	0.58	0.11	0.72	1.14	308.149	448.721	647.463	686.182
chr22:38054006-38055507	GCAT	chr22:38203911/+	-148404	0.58	0.11	0.72	1.14	248.786	366.057	275.348	183.672
chr22:38054006-38055507	LGALS1	chr22:38071612/+	-16105	0.58	0.11	0.72	1.14	11496.3	13136.8	10655	6034.56
chr22:38054006-38055507	NOL12	chr22:38082343/+	-26836	0.58	0.11	0.72	1.14	234.507	149.869	242.907	480.805
chr4:113033657-113035278	ALPK1	chr4:113218498/+	-183220	2.61	4.08	2.37	2.4	251.532	182.768	78.3277	127.829
chr4:113033657-113035278	C4orf32	chr4:113066552/+	-31274	2.61	4.08	2.37	2.4	683.201	1233.42	1392.12	811.908
chr4:113033657-113035278	AP1AR	chr4:113152894/+	-117616	2.61	4.08	2.37	2.4	391.028	431.332	594.906	620.819
chr4:113033657-113035278	TIFA	chr4:113199589/-	164311	2.61	4.08	2.37	2.4	221.876	183.812	167.708	259.584
chr8:18853129-18854695	PSD3	chr8:18871195/-	16500	0.81	1.43	0.74	0.33	690.341	711.227	919.27	789.658
chr13:24000876-24008307	SACS	chr13:24007866/-	0	0.98	2.83	1.54	0.26	2209.42	2906.53	4089.38	4220.52
chr13:24000876-24008307	TNFRSF19	chr13:24144508/+	-136201	0.98	2.83	1.54	0.26	29.1074	28.1984	20.1826	10.0343
chr5:10323434-10332791	CMBL	chr5:10308167/-	-15267	10.09	6.17	1.21	1.14	2068.83	2382.77	2461.8	1771.28
chr5:10323434-10332791	2016-03-06	chr5:10353750/+	-20959	10.09	6.17	1.21	1.14	4189.28	4794.78	3317.16	3112.39
chr5:10323434-10332791	FAM173B	chr5:10250020/-	-73414	10.09	6.17	1.21	1.14	340.502	424.021	547.814	401.373
chr5:10323434-10332791	ROPN1L	chr5:10441973/+	-109182	10.09	6.17	1.21	1.14	3.8444	28.1984	17.2994	1.3088
chr5:10323434-10332791	CCT5	chr5:10250281/+	73153	10.09	6.17	1.21	1.14	9384.68	8948.3	14567.5	18336.2
chr15:38508842-38518155	SPRED1	chr15:38545051/+	-26896	2.21	6.3	4.22	1.63	1005.58	884.595	1609.8	1594.59
chr1:26014852-26022941	AUNIP	chr1:26185948/-	163007	1.56	1.53	0.71	0.05	0	0	0	0
chr1:26014852-26022941	PAQR7	chr1:26190351/-	167410	1.56	1.53	0.71	0.05	208.146	116.449	102.835	133.936
chr1:26014852-26022941	SEPN1	chr1:26126666/+	-103725	1.56	1.53	0.71	0.05	2535.09	2196.87	1600.19	1783.93
chr1:26014852-26022941	MAN1C1	chr1:25943958/+	70894	1.56	1.53	0.71	0.05	3.8444	15.6658	8.1691	1.7451
chr1:26014852-26022941	LDLRAP1	chr1:25870075/+	144777	1.56	1.53	0.71	0.05	633.224	1057.96	1107.16	684.079
chr1:26014852-26022941	MTFR1L	chr1:26146396/+	-123455	1.56	1.53	0.71	0.05	0	0	0	0
chr9:131101845-131104181	C9orf16	chr9:130922538/+	179307	3.09	1.66	1.78	1.54	487.687	812.533	511.293	305.392
chr9:131101845-131104181	LCN2	chr9:130911731/+	190114	3.09	1.66	1.78	1.54	3.8444	0.5222	0	0
chr9:131101845-131104181	TRUB2	chr9:131084696/-	-17149	3.09	1.66	1.78	1.54	802.926	751.958	816.915	812.78
chr9:131101845-131104181	URM1	chr9:131133597/+	-29416	3.09	1.66	1.78	1.54	919.356	743.081	869.294	1007.8
chr9:131101845-131104181	CERCAM	chr9:131181438/+	-77257	3.09	1.66	1.78	1.54	1383.43	951.436	542.047	380.868
chr9:131101845-131104181	GOLGA2	chr9:131038267/-	-63578	3.09	1.66	1.78	1.54	2011.71	1454.31	911.1	914.432
chr9:131101845-131104181	DNM1	chr9:130965633/+	136212	3.09	1.66	1.78	1.54	55.4689	60.0522	49.0149	66.3138
chr9:131101845-131104181	SLC27A4	chr9:131102838/+	0	3.09	1.66	1.78	1.54	1257.66	1243.34	1333.49	1178.81
chr9:131101845-131104181	COQ4	chr9:131084790/+	17055	3.09	1.66	1.78	1.54	455.284	457.441	507.448	449.363
chr9:131101845-131104181	ODF2	chr9:131217433/+	-113252	3.09	1.66	1.78	1.54	733.178	906.005	1344.55	1578.01
chr9:131101845-131104181	CIZ1	chr9:130966661/-	-135184	3.09	1.66	1.78	1.54	2480.17	2187.99	2086.02	2895.99
chr9:131101845-131104181	GLE1	chr9:131266970/+	-162789	3.09	1.66	1.78	1.54	1045.12	1264.75	1392.12	1139.99
chr12:49075259-49076781	DDX23	chr12:49245956/-	169175	1.51	1.6	1.23	2.1	1780.5	1909.66	2319.08	2772.53
chr12:49075259-49076781	KANSL2	chr12:49075423/-	0	1.51	1.6	1.23	2.1	0	0	0	0
chr12:49075259-49076781	ADCY6	chr12:49177220/-	100439	1.51	1.6	1.23	2.1	902.88	779.635	463.239	510.005
chr12:49075259-49076781	LALBA	chr12:48963828/-	-111431	1.51	1.6	1.23	2.1	0	0	0	0
chr12:49075259-49076781	CACNB3	chr12:49208214/+	-131433	1.51	1.6	1.23	2.1	387.733	229.243	119.174	178
chr12:49075259-49076781	C12orf54	chr12:48877022/+	198237	1.51	1.6	1.23	2.1	0	0	0	0
chr12:49075259-49076781	RND1	chr12:49259652/-	182871	1.51	1.6	1.23	2.1	13.7299	16.188	12.494	4.3627
chr12:49075259-49076781	CCNT1	chr12:49110780/-	33999	1.51	1.6	1.23	2.1	464.621	532.115	556.944	586.354
chr12:109196857-109197865	CORO1C	chr12:109125325/-	-71532	0.42	0.74	-0.08	0.28	5669.91	4657.44	6128.78	5672.01
chr12:109196857-109197865	DAO	chr12:109273856/+	-75991	0.42	0.74	-0.08	0.28	0	0	0	0
chr12:109196857-109197865	SELPLG	chr12:109027669/-	-169188	0.42	0.74	-0.08	0.28	42.2882	8.3551	12.0135	7.4167
chr12:109196857-109197865	SSH1	chr12:109221326/-	23461	0.42	0.74	-0.08	0.28	2778.39	2060.57	2003.36	2012.1
chr11:113060670-113061724	ANKK1	chr11:113258512/+	-196788	1.03	0.49	0.4	0.79	0.5492	1.5666	0.4805	0.8725
chr11:113060670-113061724	TTC12	chr11:113185250/+	-123526	1.03	0.49	0.4	0.79	99.4047	133.159	135.992	101.216
chr2:240195983-240202431	HDAC4	chr2:240274612/-	72181	2.87	1.19	1.98	3.99	297.116	313.316	448.823	433.221
chr5:114505034-114506422	PGGT1B	chr5:114598568/-	92146	0.39	0.88	1.01	0.09	472.31	410.444	370.976	444.564
chr5:114505034-114506422	CCDC112	chr5:114615464/-	109042	0.39	0.88	1.01	0.09	240.548	344.647	351.754	267.873
chr5:114505034-114506422	TRIM36	chr5:114505659/-	0	0.39	0.88	1.01	0.09	81.2812	174.935	188.851	62.3873
chrX:48726063-48726888	KCND1	chrX:48828250/-	101362	0.2	0.69	0.22	0.29	7.1396	6.7885	7.6886	4.3627
chrX:48726063-48726888	TIMM17B	chrX:48755103/-	28215	0.2	0.69	0.22	0.29	286.681	251.697	271.985	310.192
chrX:48726063-48726888	PCSK1N	chrX:48694039/-	-32024	0.2	0.69	0.22	0.29	0	0	0	0
chrX:48726063-48726888	PIM2	chrX:48776412/-	49524	0.2	0.69	0.22	0.29	144.988	231.854	217.203	256.093
chrX:48726063-48726888	TFE3	chrX:48896869/-	169981	0.2	0.69	0.22	0.29	1871.66	1607.83	1252.76	1362.05
chrX:48726063-48726888	HDAC6	chrX:48661069/+	64994	0.2	0.69	0.22	0.29	639.265	588.512	438.731	421.878
chrX:48726063-48726888	GLOD5	chrX:48620153/+	105910	0.2	0.69	0.22	0.29	0	0	0	0
chrX:48726063-48726888	OTUD5	chrX:48801543/-	74655	0.2	0.69	0.22	0.29	1199.45	1561.88	1102.35	874.295
chrX:48726063-48726888	CCDC120	chrX:48910960/+	-184072	0.2	0.69	0.22	0.29	9.8855	8.3551	4.3248	2.1814
chrX:48726063-48726888	PQBP1	chrX:48755194/+	-28306	0.2	0.69	0.22	0.29	522.286	497.65	713.119	798.383
chrX:48726063-48726888	SUV39H1	chrX:48555123/+	170940	0.2	0.69	0.22	0.29	147.185	81.9843	301.778	676.663
chrX:48726063-48726888	GRIPAP1	chrX:48858674/-	131786	0.2	0.69	0.22	0.29	659.586	661.619	484.863	447.618
chrX:48726063-48726888	ERAS	chrX:48687490/+	38573	0.2	0.69	0.22	0.29	0.5492	0	0	0.8725
chrX:48726063-48726888	SLC35A2	chrX:48769234/-	42346	0.2	0.69	0.22	0.29	554.689	499.217	457.472	437.584
chrX:48726063-48726888	WAS	chrX:48542185/+	183878	0.2	0.69	0.22	0.29	7.6888	4.1775	3.3638	6.1078
chrX:48726063-48726888	GATA1	chrX:48649497/+	76566	0.2	0.69	0.22	0.29	0	0.5222	0	0
chr12:107348604-107351974	MTERF2	chr12:107372548/-	20574	4.82	3.87	1.77	2.41	0	0	0	0
chr12:107348604-107351974	RIC8B	chr12:107168398/+	180206	4.82	3.87	1.77	2.41	377.848	467.885	345.026	397.447
chr12:107348604-107351974	CRY1	chr12:107487634/-	135660	4.82	3.87	1.77	2.41	292.722	436.031	439.212	414.025
chr12:107348604-107351974	TMEM263	chr12:107349543/+	0	4.82	3.87	1.77	2.41	0	0	0	0
chr1:68577152-68578152	WLS	chr1:68698228/-	120076	0.57	0.87	0.63	0.32	1597.99	1298.12	1426.69	1837.93
chr1:68577152-68578152	DIRAS3	chr1:68516459/-	-60693	0.57	0.87	0.63	0.32	7.1396	5.7441	7.2081	9.598
chr20:7837276-7837979	HAO1	chr20:7921092/-	83113	0.02	0.26	0.62	0.54	0.5492	0	0	0
chr20:7837276-7837979	TMX4	chr20:8000475/-	162496	0.02	0.26	0.62	0.54	1070.39	1002.61	908.217	844.628
chr17:54173394-54174648	ANKFN1	chr17:54230835/+	-56187	0.98	0.19	-0.06	0.1	41.1898	6.7885	0.4805	5.2353
chr12:46653372-46663571	SLC38A1	chr12:46660277/-	0	17.21	14.43	7.36	6.43	15375.9	15972.3	12054.8	15590.7
chr12:46653372-46663571	SLC38A2	chr12:46765161/-	101590	17.21	14.43	7.36	6.43	31526.7	40338.9	23507.4	16339.8
chr18:45407521-45409759	ZBTB7C	chr18:45567493/-	157734	1.51	0.89	0.28	0.61	18.1235	11.4883	1.4416	0.8725
chr18:45407521-45409759	SMAD2	chr18:45423179/-	13420	1.51	0.89	0.28	0.61	2089.69	2311.75	1813.07	1927.9
chr15:100272850-100274387	MEF2A	chr15:100173182/+	99668	1.17	0.71	0.44	0.68	3125.4	3273.82	1974.37	1828.93
chr15:100272850-100274387	LYSMD4	chr15:100273232/-	0	1.17	0.71	0.44	0.68	142.319	160.12	142.878	102.027
chr16:76227657-76229119	CNTNAP4	chr16:76311175/+	-82056	0.43	0.58	0.46	0.79	155.972	83.5509	38.9236	65.005
chr5:177502784-177503701	PHYKPL	chr5:177658523/-	154822	0.61	0.78	0.19	0.19	0	0	0	0
chr5:177502784-177503701	NHP2	chr5:177580960/-	77259	0.61	0.78	0.19	0.19	1334	1150.39	1352.71	1691.44
chr5:177502784-177503701	PROP1	chr5:177423242/-	-79542	0.61	0.78	0.19	0.19	0	0	0	0
chr5:177502784-177503701	RMND5B	chr5:177557961/+	-54260	0.61	0.78	0.19	0.19	360.822	403.655	381.547	273.108
chr5:177502784-177503701	HNRNPAB	chr5:177631507/+	-127806	0.61	0.78	0.19	0.19	3638.96	3878.62	7276.21	9269.93
chr5:177502784-177503701	N4BP3	chr5:177540555/+	-36854	0.61	0.78	0.19	0.19	12.0823	3.6554	2.8832	7.8529
chr4:114730097-114733547	CAMK2D	chr4:114683082/-	-47015	0.71	0.26	0.61	4.27	2068.28	1872.06	1336.86	716.364
chr4:114730097-114733547	ARSJ	chr4:114900877/-	167330	0.71	0.26	0.61	4.27	633.224	533.159	930.803	972.457
chr2:28019643-28033598	MRPL33	chr2:27994583/+	25060	13.06	9.04	7.92	12.75	654.643	567.102	638.155	753.447
chr2:28019643-28033598	CCDC121	chr2:27851897/-	-167746	13.06	9.04	7.92	12.75	62.6085	37.5979	26.4296	41.8824
chr2:28019643-28033598	SUPT7L	chr2:27886706/-	-132937	13.06	9.04	7.92	12.75	815.7	722.428	613.556	643.235
chr2:28019643-28033598	RBKS	chr2:28081437/-	47839	13.06	9.04	7.92	12.75	26.3615	29.765	34.1182	15.7059
chr2:28019643-28033598	GPN1	chr2:27853893/+	165750	13.06	9.04	7.92	12.75	826.542	679.149	759.611	1051.99
chr2:28019643-28033598	ZNF512	chr2:27820936/+	198707	13.06	9.04	7.92	12.75	1107.73	1013.8	607.04	726.699
chr2:28019643-28033598	BRE	chr2:28113481/+	-79883	13.06	9.04	7.92	12.75	523.385	394.245	298.414	410.535
chr2:28019643-28033598	SLC4A1AP	chr2:27886337/+	133306	13.06	9.04	7.92	12.75	696.788	582.533	583.945	693.948
chr11:118161481-118162651	KMT2A	chr11:118307204/+	-144553	0.44	0.96	0.45	0.55	0	0	0	0
chr11:118161481-118162651	MPZL2	chr11:118135250/-	-26231	0.44	0.96	0.45	0.55	62.6085	35.5091	16.8188	33.1569
chr11:118161481-118162651	MPZL3	chr11:118123082/-	-38399	0.44	0.96	0.45	0.55	25.2631	9.3995	5.2859	25.7402
chr11:118161481-118162651	AMICA1	chr11:118095808/-	-65673	0.44	0.96	0.45	0.55	0	0	0	0
chr11:118161481-118162651	TMPRSS4	chr11:117975405/+	186076	0.44	0.96	0.45	0.55	0	0	0	0
chr11:118161481-118162651	UBE4A	chr11:118230295/+	-67644	0.44	0.96	0.45	0.55	2862.96	3508.09	3099.47	2403
chr11:118161481-118162651	SCN2B	chr11:118047336/-	-114145	0.44	0.96	0.45	0.55	10.4347	2.0888	0.4805	0.4363
chr11:118161481-118162651	ATP5L	chr11:118272103/+	-109452	0.44	0.96	0.45	0.55	1958.99	1782.25	1568	1681.84
chr11:118161481-118162651	SCN4B	chr11:118023629/-	-137852	0.44	0.96	0.45	0.55	5.492	2.0888	0	0.4363
chr11:118161481-118162651	CD3D	chr11:118213458/-	50807	0.44	0.96	0.45	0.55	0	0	0	0
chr11:118161481-118162651	CD3E	chr11:118175294/+	-12643	0.44	0.96	0.45	0.55	0	0	0	0
chr11:118161481-118162651	CD3G	chr11:118215058/+	-52407	0.44	0.96	0.45	0.55	0	0	0	0
chr18:57566671-57567917	PMAIP1	chr18:57567191/+	0	0.62	0.98	0.74	1.07	6.5904	7.3107	42.7679	39.701
chr1:54752529-54753382	MRPL37	chr1:54665839/+	86690	0.16	0.74	0.04	0.06	1738.76	1865.8	2034.12	2345.85
chr1:54752529-54753382	SSBP3	chr1:54872067/-	118685	0.16	0.74	0.04	0.06	454.735	595.822	438.251	291.432
chr1:54752529-54753382	CDCP2	chr1:54618678/-	-133851	0.16	0.74	0.04	0.06	1.0984	0	0	0
chr1:54752529-54753382	CYB5RL	chr1:54665745/-	-86784	0.16	0.74	0.04	0.06	79.0844	34.4648	91.7828	156.186
chr8:105799638-105802083	LRP12	chr8:105601251/-	-198387	4.78	2.22	1.41	3.59	769.425	678.329	542.047	587.226
chr14:93439364-93453337	ITPK1	chr14:93581528/-	128191	7.1	2.89	2.03	1.75	2706.44	2524.28	1922.15	1671.81
chr14:93439364-93453337	CHGA	chr14:93389444/+	49920	7.1	2.89	2.03	1.75	0	1.0444	0	0
chr14:93439364-93453337	GOLGA5	chr14:93263752/+	175612	7.1	2.89	2.03	1.75	913.864	821.41	651.61	672.3
chr14:93439364-93453337	TMEM251	chr14:93651295/+	-197958	7.1	2.89	2.03	1.75	0	0	0	0
chr14:93439364-93453337	MOAP1	chr14:93650706/-	197369	7.1	2.89	2.03	1.75	492.081	561.358	289.284	232.535
chr12:110317790-110339203	C12orf76	chr12:110503837/-	164634	1.44	4.26	3.42	4.13	108.741	89.8172	71.7395	66.7501
chr12:110317790-110339203	ANKRD13A	chr12:110437234/+	-98031	1.44	4.26	3.42	4.13	1872.21	2029.24	1809.23	1283.08
chr12:110317790-110339203	FAM222A	chr12:110181905/+	135885	1.44	4.26	3.42	4.13	0	0	0	0
chr12:110317790-110339203	GLTP	chr12:110318292/-	0	1.44	4.26	3.42	4.13	1016.56	1006.27	1307.06	1068
chr12:110317790-110339203	TCHP	chr12:110338322/+	0	1.44	4.26	3.42	4.13	512.291	439.598	637.088	1057.43
chr12:110317790-110339203	GIT2	chr12:110434193/-	94990	1.44	4.26	3.42	4.13	1431.32	1463.8	1244.22	888.352
chr12:110317790-110339203	TRPV4	chr12:110271211/-	-46579	1.44	4.26	3.42	4.13	15.3775	9.9217	1.4416	6.5441
chr5:172720552-172721697	STC2	chr5:172756505/-	34808	0.62	0.34	0.12	1.05	589.288	227.676	1848.63	2022.57
chr5:172720552-172721697	BNIP1	chr5:172571444/+	149108	0.62	0.34	0.12	1.05	154.874	81.4621	123.498	222.064
chr5:172720552-172721697	NKX2-5	chr5:172662314/-	-58238	0.62	0.34	0.12	1.05	238.351	169.713	235.944	447.182
chr3:145939720-145941743	PLOD2	chr3:145879281/-	-60439	1.12	1.23	0.64	2.02	2871.2	2154.05	1274.39	1622.07
chr3:145939720-145941743	PLSCR4	chr3:145939878/-	0	1.12	1.23	0.64	2.02	1250.52	916.449	242.191	188.471
chr6:79519550-79521267	IRAK1BP1	chr6:79577260/+	-55993	2.84	0.56	0.15	0.21	103.029	62.4752	62.7871	88.8867
chr18:18763265-18764443	ROCK1	chr18:18691811/-	-71454	0.84	0.09	-0.09	0.02	3918.5	3629.01	3098.05	2845.91
chr18:18763265-18764443	GREB1L	chr18:18822202/+	-57759	0.84	0.09	-0.09	0.02	76.8876	47.5196	25.9491	16.1422
chr16:84676192-84683055	KLHL36	chr16:84682116/+	0	4.22	2.88	1.54	2.06	363.568	302.872	215.762	222.5
chr16:84676192-84683055	CRISPLD2	chr16:84853586/+	-170531	4.22	2.88	1.54	2.06	1982.6	1368.15	843.345	414.897
chr16:84676192-84683055	USP10	chr16:84733554/+	-50499	4.22	2.88	1.54	2.06	2071.57	2632.9	4016.34	3676.49
chr16:84676192-84683055	COTL1	chr16:84651701/-	-24491	4.22	2.88	1.54	2.06	7058.83	12275.7	14418.1	8974.61
chr16:84676192-84683055	TLDC1	chr16:84538287/-	-137905	4.22	2.88	1.54	2.06	0	0	0	0
chr5:9712310-9713499	SEMA5A	chr5:9546232/-	-166078	1.01	1.19	0.82	0.36	768.876	806.788	264.776	431.04
chr5:9712310-9713499	TAS2R1	chr5:9630462/-	-81848	1.01	1.19	0.82	0.36	2.746	0.5222	0	0
chr6:169612204-169625078	THBS2	chr6:169650900/-	25822	13.54	2.91	1.48	5.5	487.687	267.363	172.033	207.231
chr1:237978650-237979577	ZP4	chr1:238054221/-	74644	0.64	0.86	0.39	0.01	0	0	0	0
chr17:40915480-40935930	PTGES3L	chr17:41132544/-	196614	1.28	1.45	1.22	2.06	0	0	0	0
chr17:40915480-40935930	AOC3	chr17:41003200/+	-67270	1.28	1.45	1.22	2.06	128.512	39.1018	11.5329	12.9225
chr17:40915480-40935930	AOC2	chr17:40996608/+	-60678	1.28	1.45	1.22	2.06	134.553	61.0966	57.6646	68.0589
chr17:40915480-40935930	RUNDC1	chr17:41132581/+	-196651	1.28	1.45	1.22	2.06	461.875	469.452	484.382	490.809
chr17:40915480-40935930	PLEKHH3	chr17:40829047/-	-86433	1.28	1.45	1.22	2.06	786.45	811.488	413.263	313.682
chr17:40915480-40935930	EZH1	chr17:40897070/-	-18410	1.28	1.45	1.22	2.06	431.12	472.585	363.767	367.78
chr17:40915480-40935930	CNTD1	chr17:40950853/+	-14923	1.28	1.45	1.22	2.06	27.1853	27.6188	20.8698	28.1572
chr17:40915480-40935930	VPS25	chr17:40925453/+	0	1.28	1.45	1.22	2.06	1092.35	1102.35	1017.3	846.373
chr17:40915480-40935930	AARSD1	chr17:41116514/-	180584	1.28	1.45	1.22	2.06	364.667	234.465	357.04	575.447
chr17:40915480-40935930	BECN1	chr17:40975896/-	39966	1.28	1.45	1.22	2.06	1492.99	1671.6	1241.98	999.27
chr17:40915480-40935930	CCR10	chr17:40833844/-	-81636	1.28	1.45	1.22	2.06	13.1807	6.7885	2.4027	4.799
chr17:40915480-40935930	WNK4	chr17:40932648/+	0	1.28	1.45	1.22	2.06	41.7829	24.0209	32.0279	58.4696
chr17:40915480-40935930	PSME3	chr17:40985158/+	-49228	1.28	1.45	1.22	2.06	5087.21	4849.09	6253.24	6816.36
chr17:40915480-40935930	COA3	chr17:40950742/-	14812	1.28	1.45	1.22	2.06	0	0	0	0
chr17:40915480-40935930	RAMP2	chr17:40913211/+	2269	1.28	1.45	1.22	2.06	0	0	0	0
chr17:40915480-40935930	PSMC3IP	chr17:40729848/-	-185632	1.28	1.45	1.22	2.06	58.451	28.376	216.766	554.431
chr17:40915480-40935930	MLX	chr17:40719077/+	196403	1.28	1.45	1.22	2.06	1282.14	891.206	1061.47	1330.28
chr17:40915480-40935930	CNTNAP1	chr17:40834631/+	80849	1.28	1.45	1.22	2.06	1784.34	816.71	397.886	471.613
chr17:40915480-40935930	G6PC	chr17:41052813/+	-116883	1.28	1.45	1.22	2.06	0	0	0	0
chr17:40915480-40935930	TUBG1	chr17:40761357/+	154123	1.28	1.45	1.22	2.06	1006.51	1086.78	1815.06	2051.51
chr17:40915480-40935930	TUBG2	chr17:40811265/+	104215	1.28	1.45	1.22	2.06	334.631	290.245	263.263	191.813
chr17:40915480-40935930	PTGES3L-AARSD1	chr17:41131679/-	195749	1.28	1.45	1.22	2.06	0	0	0	0
chr17:40915480-40935930	FAM134C	chr17:40761444/-	-154036	1.28	1.45	1.22	2.06	1167.04	1785.38	1178.28	558.432
chr18:46427716-46430110	SMAD7	chr18:46469176/-	39066	4.28	1.99	2.27	3.25	281.189	402.611	221.048	136.118
chr6:5259919-5262543	FARS2	chr6:5261583/+	0	3.38	3.03	1.92	2.21	215.285	183.812	213.359	189.78
chr6:5259919-5262543	LYRM4	chr6:5261182/-	0	3.38	3.03	1.92	2.21	360.822	354.569	418.068	466.814
chr13:20160868-20162238	TPTE2	chr13:20110902/-	-49966	0.35	0.77	0.44	-0.07	0	0.5222	0	0.4363
chr13:20160868-20162238	MPHOSPH8	chr13:20207787/+	-45549	0.35	0.77	0.44	-0.07	1028.65	1176.5	1032.2	877.349
chr13:20160868-20162238	PSPC1	chr13:20356930/-	194692	0.35	0.77	0.44	-0.07	833.681	859.53	1065.35	1239.02
chr7:47266889-47307178	TNS3	chr7:47479255/-	172077	16.12	5.06	1.94	1.37	6024.14	2256.4	1212.4	2602.38
chr2:108966063-108966952	SULT1C2	chr2:108910102/+	55961	0.56	-0.02	-0.02	0.21	0.5492	0	0	0
chr2:108966063-108966952	LIMS1	chr2:109150810/+	-183858	0.56	-0.02	-0.02	0.21	1104.31	668.71	559.318	752.491
chr2:108966063-108966952	GCC2	chr2:109065576/+	-98624	0.56	-0.02	-0.02	0.21	1820.63	1704.44	997.684	917.892
chr2:108966063-108966952	SULT1C4	chr2:108994420/+	-27468	0.56	-0.02	-0.02	0.21	0	0	0	0
chr2:211286162-211287391	LANCL1	chr2:211341135/-	53744	1.9	0.82	0.15	0.04	3430.28	3069.45	1983.18	1944.91
chr2:211286162-211287391	ACADL	chr2:211090214/-	-195948	1.9	0.82	0.15	0.04	60.9609	4.6997	0.9611	2.1814
chr2:211286162-211287391	CPS1	chr2:211342405/+	-55014	1.9	0.82	0.15	0.04	1726.68	1458.49	842.864	951.079
chr2:211286162-211287391	MYL1	chr2:211179894/-	-106268	1.9	0.82	0.15	0.04	7.6888	2.611	0	0
chr19:46572901-46586714	CCDC61	chr19:46506265/+	66636	3.13	4.92	4.31	3.39	51.6245	69.9739	82.6526	69.3677
chr19:46572901-46586714	MYPOP	chr19:46405861/-	-167040	3.13	4.92	4.31	3.39	253.729	238.12	204.709	219.883
chr19:46572901-46586714	NOVA2	chr19:46476656/-	-96245	3.13	4.92	4.31	3.39	246.04	181.201	85.0553	116.485
chr19:46572901-46586714	NANOS2	chr19:46418035/-	-154866	3.13	4.92	4.31	3.39	0	0.5222	0	0.4363
chr19:46572901-46586714	PGLYRP1	chr19:46526555/-	-46346	3.13	4.92	4.31	3.39	2.746	1.5666	1.4416	0
chr19:46572901-46586714	IRF2BP1	chr19:46389427/-	-183474	3.13	4.92	4.31	3.39	472.31	631.854	591.543	581.118
chr19:46572901-46586714	IGFL3	chr19:46627930/-	41216	3.13	4.92	4.31	3.39	6.0412	0.5222	0	0
chr19:46572901-46586714	IGFL2	chr19:46651038/+	-64324	3.13	4.92	4.31	3.39	11.5331	1.5666	0.4805	0
chr19:46572901-46586714	IGFL1	chr19:46733008/+	-146294	3.13	4.92	4.31	3.39	3.2952	39.6867	1.9222	0
chr19:46572901-46586714	IGFL4	chr19:46544273/-	-28628	3.13	4.92	4.31	3.39	0	1.0444	0	0
chr9:96792152-96794470	BARX1	chr9:96717607/-	-74545	2.29	1.4	1.79	3.03	0.5492	0	0	0
chr9:96792152-96794470	PTPDC1	chr9:96793075/+	0	2.29	1.4	1.79	3.03	325.125	241.775	213.839	352.51
chr4:89885065-89885790	TIGD2	chr4:90033967/+	-148177	0.12	0.23	0.48	0.26	349.839	375.979	317.636	288.378
chr4:89885065-89885790	FAM13A	chr4:89978345/-	92555	0.12	0.23	0.48	0.26	710.546	546.381	451.773	557.162
chr2:15870121-15873065	NBAS	chr2:15701471/-	-168650	1.91	2.63	0.73	0.12	1440.54	1834.46	1289.28	910.942
chr2:15870121-15873065	DDX1	chr2:15731744/+	138377	1.91	2.63	0.73	0.12	3343.51	3509.66	4203.27	4247.14
chr7:86973138-86975591	CROT	chr7:86974950/+	0	2.71	1.97	1.79	1.6	533.27	407.311	351.754	316.736
chr7:86973138-86975591	TMEM243	chr7:86849030/-	-124108	2.71	1.97	1.79	1.6	0	0	0	0
chr7:86973138-86975591	DMTF1	chr7:86800310/+	172828	2.71	1.97	1.79	1.6	561.559	736.225	603.22	499.875
chr7:86973138-86975591	ABCB4	chr7:87104786/-	129195	2.71	1.97	1.79	1.6	3.8444	1.5666	0.4805	0
chr3:110627024-110628050	PVRL3	chr3:110790605/+	-162555	0.21	0.89	0.1	0.15	498.122	528.982	625.18	947.589
chr7:78910920-78923735	MAGI2	chr7:79082889/-	159154	2.93	0.03	0.01	7.48	0	0.5222	0	0
chr1:97378256-97379402	PTBP2	chr1:97235258/+	142998	0.88	0.25	0.22	0.07	252.631	169.191	170.111	290.995
chr1:182142721-182177760	GLUL	chr1:182357884/-	180124	18.61	3.13	-0.09	0.42	6077.96	5329.5	1813.07	1187.1
chr1:182142721-182177760	TEDDM1	chr1:182369750/-	191990	18.61	3.13	-0.09	0.42	0.5492	0	0	0
chr1:182142721-182177760	ZNF648	chr1:182030846/-	-111875	18.61	3.13	-0.09	0.42	18.1235	6.2663	1.4416	0.8725
chr16:81584984-81586327	CMIP	chr16:81528953/+	56031	0.79	1.06	0.01	-0.05	2079.81	2020.37	1489.67	1577.57
chr11:11413008-11414133	CSNK2A3	chr11:11374903/-	-38105	0.93	0.91	0.29	0.81	0	0	0	0
chr2:28903817-28918851	SPDYA	chr2:29033699/+	-114848	12.36	4.98	0.01	0.5	15.9652	17.671	14.9207	18.6333
chr2:28903817-28918851	TRMT61B	chr2:29093174/-	174323	12.36	4.98	0.01	0.5	232.821	171.728	219.519	258.515
chr2:28903817-28918851	PPP1CB	chr2:28974613/+	-55762	12.36	4.98	0.01	0.5	14037.5	10713	7498.38	6944.52
chr2:28903817-28918851	WDR43	chr2:29117508/+	-198657	12.36	4.98	0.01	0.5	1609.15	1323.76	2351.27	3585.74
chr2:28903817-28918851	PLB1	chr2:28718937/+	184880	12.36	4.98	0.01	0.5	30.755	8.8773	3.3638	4.3627
chr12:15834566-15855618	PTPRO	chr12:15702027/+	132539	2.4	0.93	3.45	14.05	17.0251	0.5222	0.9611	4.799
chr12:15834566-15855618	EPS8	chr12:15835905/-	0	2.4	0.93	3.45	14.05	3628.55	2401.04	2241.23	2646.44
chr12:15834566-15855618	STRAP	chr12:16035287/+	-179669	2.4	0.93	3.45	14.05	6194.94	6011.49	6745.31	5918.94
chr6:152011256-152012593	CCDC170	chr6:151815174/+	196082	0.43	0.45	0	0.57	0	0	0	0
chr6:152011256-152012593	ESR1	chr6:152011630/+	0	0.43	0.45	0	0.57	4.9428	0.5222	0.4805	1.3088
chr6:27543387-27601698	HIST1H2BL	chr6:27775708/-	174010	12.47	12.72	9.33	8.1	4.5474	1.1175	2.0423	1.8978
chr6:27543387-27601698	ZNF184	chr6:27440896/-	-102491	12.47	12.72	9.33	8.1	264.164	287.728	208.073	199.378
chr6:27543387-27601698	HIST1H3H	chr6:27777841/+	-176143	12.47	12.72	9.33	8.1	15.3775	67.3629	35.5598	13.9608
chr6:27543387-27601698	HIST1H2AI	chr6:27775976/+	-174278	12.47	12.72	9.33	8.1	0	0	0	0
chr6:27543387-27601698	ZNF391	chr6:27368071/+	175316	12.47	12.72	9.33	8.1	67.002	33.4204	23.5464	41.4461
chr1:228799859-228800963	BTNL10	chr1:228699988/-	-99871	0.98	0.61	0.59	0.33	0	0	0	0
chr1:228799859-228800963	TRIM17	chr1:228604582/-	-195277	0.98	0.61	0.59	0.33	9.3364	7.8329	2.4027	4.3627
chr1:228799859-228800963	RNF187	chr1:228675067/+	124792	0.98	0.61	0.59	0.33	2002.92	2439.69	2043.73	1198.45
chr1:228799859-228800963	RHOU	chr1:228870823/+	-69860	0.98	0.61	0.59	0.33	912.765	1013.58	297.453	306.265
chr1:228799859-228800963	HIST3H2BB	chr1:228645807/+	154052	0.98	0.61	0.59	0.33	2.746	8.3655	5.2859	2.1814
chr1:228799859-228800963	HIST3H2A	chr1:228645559/-	-154300	0.98	0.61	0.59	0.33	52.7229	175.457	125.421	35.3383
chr5:56641928-56642818	GPBP1	chr5:56542126/+	99802	0.01	0.82	0.97	0.25	1929.33	1769.71	1731.38	2105.03
chr5:56641928-56642818	ACTBL2	chr5:56778635/-	135817	0.01	0.82	0.97	0.25	13.1807	14.0992	7.6886	6.1078
chr12:22031832-22032998	CMAS	chr12:22199109/+	-166111	1.24	1.21	0.19	0.51	1103.34	810.966	942.816	1072.36
chr12:22031832-22032998	KCNJ8	chr12:21927754/-	-104078	1.24	1.21	0.19	0.51	19.7711	10.4439	17.2994	19.1961
chr12:22031832-22032998	ABCC9	chr12:22089627/-	56629	1.24	1.21	0.19	0.51	47.7801	8.3551	17.7799	135.245
chr19:24235336-24236052	ZNF254	chr19:24232278/+	3058	0.1	0.55	0.28	0.01	72.6258	77.4987	69.3465	64.1411
chr19:24235336-24236052	ZNF726	chr19:24097683/+	137653	0.1	0.55	0.28	0.01	0	0	0	0
chr21:46347124-46472707	PTTG1IP	chr21:46293817/-	-53307	144.92	82.14	28.79	40.89	3369.87	3834.46	2314.27	1413.97
chr21:46347124-46472707	ITGB2	chr21:46348787/-	0	144.92	82.14	28.79	40.89	49.9714	0	0.9611	1.7451
chr21:46347124-46472707	SUMO3	chr21:46238043/-	-109081	144.92	82.14	28.79	40.89	1690.43	1480.42	1758.77	2071
chr21:46347124-46472707	FAM207A	chr21:46359954/+	0	144.92	82.14	28.79	40.89	0	0	0	0
chr21:46347124-46472707	ADARB1	chr21:46494492/+	-21785	144.92	82.14	28.79	40.89	4240.9	7110.18	3476.69	1928.77
chr21:46347124-46472707	UBE2G2	chr21:46221750/-	-125374	144.92	82.14	28.79	40.89	1615.74	1236.55	2172.51	2431.8
chr19:4830994-4832369	TICAM1	chr19:4831753/-	0	2.23	1.42	0.96	1.49	519.54	535.77	472.369	426.241
chr19:4830994-4832369	TNFAIP8L1	chr19:4651878/+	179116	2.23	1.42	0.96	1.49	81.2812	93.9948	145.603	144.843
chr19:4830994-4832369	KDM4B	chr19:4969123/+	-136754	2.23	1.42	0.96	1.49	2223.15	2593.21	1448.82	599.442
chr19:4830994-4832369	UHRF1	chr19:4903091/+	-70722	2.23	1.42	0.96	1.49	750.719	163.969	1895.72	4412.47
chr19:4830994-4832369	DPP9	chr19:4723854/-	-107140	2.23	1.42	0.96	1.49	1631.12	1519.06	2229.22	2318.8
chr19:4830994-4832369	MYDGF	chr19:4670414/-	-160580	2.23	1.42	0.96	1.49	0	0	0	0
chr19:4830994-4832369	DPP9-AS1	chr19:4682812/+	148182	2.23	1.42	0.96	1.49	0	0	0	0
chr19:4830994-4832369	PLIN3	chr19:4861422/-	29053	2.23	1.42	0.96	1.49	4901.58	4916.97	5378.66	3271.63
chr19:4830994-4832369	FEM1A	chr19:4791727/+	39267	2.23	1.42	0.96	1.49	785.319	789.316	969.428	1190.6
chr17:43095726-43097435	C1QL1	chr17:43045643/-	-50083	2.31	1.39	1.14	1.35	383.34	543.081	120.135	84.6373
chr17:43095726-43097435	CCDC103	chr17:42978357/+	117369	2.31	1.39	1.14	1.35	73.5924	57.9634	35.5598	15.7059
chr17:43095726-43097435	NMT1	chr17:43138666/+	-41231	2.31	1.39	1.14	1.35	2615.28	2626.63	3077.37	3101.91
chr17:43095726-43097435	HEXIM2	chr17:43237540/+	-140105	2.31	1.39	1.14	1.35	89.1512	50.0104	26.5113	20.5224
chr17:43095726-43097435	DCAKD	chr17:43112366/-	14931	2.31	1.39	1.14	1.35	458.03	521.149	466.122	402.682
chr17:43095726-43097435	GJC1	chr17:42908178/-	-187548	2.31	1.39	1.14	1.35	536.016	641.253	801.057	788.785
chr17:43095726-43097435	EFTUD2	chr17:42976992/-	-118734	2.31	1.39	1.14	1.35	3029.88	3309.12	4425.71	4573.4
chr17:43095726-43097435	HEXIM1	chr17:43224683/+	-127248	2.31	1.39	1.14	1.35	3114.5	7329.5	4385.39	1499.48
chr17:43095726-43097435	PLCD3	chr17:43209899/-	112464	2.31	1.39	1.14	1.35	1877.16	3221.41	1324.36	719.417
chr17:43095726-43097435	KIF18B	chr17:43025078/-	-70648	2.31	1.39	1.14	1.35	193.35	115.405	790.836	1471.12
chr17:43095726-43097435	ACBD4	chr17:43209966/+	-112531	2.31	1.39	1.14	1.35	193.317	169.713	68.2364	39.701
chr17:43095726-43097435	HIGD1B	chr17:42925427/+	170299	2.31	1.39	1.14	1.35	2.2352	2.1044	2.9313	3.5556
chr17:43095726-43097435	GFAP	chr17:42992919/-	-102807	2.31	1.39	1.14	1.35	2.1968	0.5222	0	0.8725
chr6:5470890-5471930	FARS2	chr6:5368782/+	102108	0.76	0.27	0.44	0.16	215.285	183.812	213.359	189.78
chr5:20678464-20680011	CDH18	chr5:20575981/-	-102483	-0.22	1.55	2.23	1.34	818.853	578.068	265.738	314.99
chr11:35232047-35233025	CD44	chr11:35160416/+	71631	0.48	1.63	0.71	0.03	7021.48	12231.3	14844.3	8075.01
chr11:35232047-35233025	SLC1A2	chr11:35339062/-	106037	0.48	1.63	0.71	0.03	0	0.5222	0.9611	0.4363
chr1:171050114-171051474	FMO2	chr1:171154346/+	-102872	1.09	0.18	-0.09	0.12	68.1004	0.5222	0	0
chr1:171050114-171051474	FMO3	chr1:171060017/+	-8543	1.09	0.18	-0.09	0.12	19.7711	0	0.4805	1.7451
chr1:171050114-171051474	FMO1	chr1:171217609/+	-166135	1.09	0.18	-0.09	0.12	2.746	0.5222	0	0
chr1:171050114-171051474	MROH9	chr1:170914660/+	135454	1.09	0.18	-0.09	0.12	0	0	0	0
chr8:17779239-17781709	MTUS1	chr8:17658425/-	-120814	3.53	2.11	1.1	2.52	189.473	185.379	75.4445	64.5687
chr8:17779239-17781709	FGL1	chr8:17753046/-	-26193	3.53	2.11	1.1	2.52	0	0	0	0
chr8:17779239-17781709	ASAH1	chr8:17941878/-	160169	3.53	2.11	1.1	2.52	1623.43	1590.6	551.177	389.157
chr8:17779239-17781709	PCM1	chr8:17780365/+	0	3.53	2.11	1.1	2.52	2139.67	2682.51	2906.3	2875.92
chr1:59634569-59658051	FGGY	chr1:59762624/+	-104573	4.63	4.52	2.06	-0.07	111.487	76.2402	37.482	32.2843
chr6:96022284-96026607	MANEA	chr6:96025372/+	0	6.27	3.02	2.26	4.51	611.256	455.875	641.519	933.192
chr1:204244542-204266443	KISS1	chr1:204165618/-	-78924	3.7	2.66	3.3	5.36	0	0	0.4805	0
chr1:204244542-204266443	SOX13	chr1:204082042/+	162500	3.7	2.66	3.3	5.36	458.58	499.739	405.574	239.515
chr1:204244542-204266443	PLEKHA6	chr1:204243936/-	-606	3.7	2.66	3.3	5.36	95.0111	74.6736	16.8188	26.1765
chr1:204244542-204266443	PIK3C2B	chr1:204439013/-	172570	3.7	2.66	3.3	5.36	148.283	152.48	34.5988	23.5588
chr1:204244542-204266443	GOLT1A	chr1:204183219/-	-61323	3.7	2.66	3.3	5.36	0	0	0	0
chr1:204244542-204266443	PPP1R15B	chr1:204380944/-	114501	3.7	2.66	3.3	5.36	2033.13	2292.43	2335.42	2012.97
chr1:204244542-204266443	REN	chr1:204135464/-	-109078	3.7	2.66	3.3	5.36	0	0	0	0
chr1:204244542-204266443	ETNK2	chr1:204121309/-	-123233	3.7	2.66	3.3	5.36	745.81	516.971	18.2605	31.4118
chr20:22664181-22672908	FOXA2	chr20:22566100/-	-98081	1.07	1.21	0.55	1.91	28.0091	12.5326	53.3397	232.971
chr19:555557-556803	PRSS57	chr19:695460/-	138657	1.16	1.4	0.45	0.42	0	0	0	0
chr19:555557-556803	C2CD4C	chr19:409169/-	-146388	1.16	1.4	0.45	0.42	1.0984	0	1.4416	2.6176
chr19:555557-556803	THEG	chr19:376012/-	-179545	1.16	1.4	0.45	0.42	0	0	0	0.4363
chr19:555557-556803	GZMM	chr19:547283/+	8274	1.16	1.4	0.45	0.42	0	0	0	0
chr19:555557-556803	HCN2	chr19:589892/+	-33089	1.16	1.4	0.45	0.42	62.0593	96.0836	70.6391	23.9951
chr19:555557-556803	CDC34	chr19:531732/+	23825	1.16	1.4	0.45	0.42	723.293	930.548	1048.05	818.015
chr19:555557-556803	FSTL3	chr19:676388/+	-119585	1.16	1.4	0.45	0.42	4896.09	5214.62	2737.15	2344.11
chr19:555557-556803	ODF3L2	chr19:474982/-	-80575	1.16	1.4	0.45	0.42	1.6476	1.5666	0.9611	0
chr19:555557-556803	MADCAM1	chr19:496489/+	59068	1.16	1.4	0.45	0.42	0	1.0444	0.9611	0.4363
chr19:555557-556803	POLRMT	chr19:633567/-	76764	1.16	1.4	0.45	0.42	489.335	535.248	829.889	935.81
chr19:555557-556803	PALM	chr19:708952/+	-152149	1.16	1.4	0.45	0.42	18.6727	2.611	0.4805	0.4363
chr19:555557-556803	TPGS1	chr19:507496/+	48061	1.16	1.4	0.45	0.42	0	0	0	0
chr19:555557-556803	BSG	chr19:571276/+	-14473	1.16	1.4	0.45	0.42	10458.4	14255.9	9787.6	7578.97
chr19:555557-556803	FGF22	chr19:639894/+	-83091	1.16	1.4	0.45	0.42	1.0984	2.0888	0.9611	5.6716
chr19:555557-556803	RNF126	chr19:663232/-	106429	1.16	1.4	0.45	0.42	565.124	539.426	921.672	1157.44
chr19:555557-556803	MISP	chr19:751145/+	-194342	1.16	1.4	0.45	0.42	0	0	0	0
chr15:51379213-51437161	AP4E1	chr15:51207621/+	171592	65.77	18.98	5.54	35.82	928.692	1200.52	965.882	657.903
chr15:51379213-51437161	CYP19A1	chr15:51535146/-	97985	65.77	18.98	5.54	35.82	84.5763	7.8329	2.8832	26.1765
chr15:51379213-51437161	TNFAIP8L3	chr15:51397472/-	0	65.77	18.98	5.54	35.82	1226.36	618.799	282.076	304.956
chr15:51379213-51437161	GLDN	chr15:51633712/+	-196551	65.77	18.98	5.54	35.82	177.94	67.3629	33.1571	38.3922
chr15:40063327-40076050	THBS1	chr15:39874029/+	189298	2.09	1.59	0.13	0.86	40691.7	5534.2	4314.27	22668.4
chr15:40063327-40076050	EIF2AK4	chr15:40226324/+	-150274	2.09	1.59	0.13	0.86	3559.9	3678.85	2974.05	2848.44
chr15:40063327-40076050	FSIP1	chr15:40075038/-	0	2.09	1.59	0.13	0.86	20.8695	17.7546	17.7799	18.7598
chr15:40063327-40076050	GPR176	chr15:40121476/-	45426	2.09	1.59	0.13	0.86	1332.9	960.313	525.228	742.976
chr2:203240136-203242675	SUMO1	chr2:203103321/-	-136815	2.61	2.09	1.86	1.57	1475.14	1764.49	1825.08	1418.77
chr2:203240136-203242675	BMPR2	chr2:203241049/+	0	2.61	2.09	1.86	1.57	2480.17	3014.1	2084.09	1174.89
chr2:203240136-203242675	NOP58	chr2:203130514/+	109622	2.61	2.09	1.86	1.57	1439.45	1267.36	2806.34	3632.43
chr3:128805900-128806564	HMCES	chr3:128997683/+	-191119	0.6	0.24	0.1	0.04	0	0	0	0
chr3:128805900-128806564	KIAA1257	chr3:128712985/-	-92915	0.6	0.24	0.1	0.04	0.5492	0.5222	0	0
chr3:128805900-128806564	COPG1	chr3:128968452/+	-161888	0.6	0.24	0.1	0.04	0	0	0	0
chr3:128805900-128806564	CNBP	chr3:128890613/-	84049	0.6	0.24	0.1	0.04	4233.76	4324.8	5096.59	6740.01
chr3:128805900-128806564	GP9	chr3:128780570/+	25330	0.6	0.24	0.1	0.04	0	0	0	0
chr3:128805900-128806564	ISY1	chr3:128880072/-	73508	0.6	0.24	0.1	0.04	312.18	273.593	370.409	596.994
chr3:128805900-128806564	ISY1-RAB43	chr3:128880072/-	73508	0.6	0.24	0.1	0.04	0	0	0	0
chr3:128805900-128806564	RAB43	chr3:128840334/-	33770	0.6	0.24	0.1	0.04	1261.82	1130.58	583.94	341.433
chr7:91924086-91925751	ANKIB1	chr7:91924202/+	0	1.41	0.6	0.21	0.11	1779.4	2177.02	1824.12	1297.48
chr7:91924086-91925751	KRIT1	chr7:91875413/-	-48673	1.41	0.6	0.21	0.11	924.848	656.397	647.765	846.373
chr7:91924086-91925751	GATAD1	chr7:92076761/+	-151010	1.41	0.6	0.21	0.11	842.468	755.091	691.495	818.888
chr7:91924086-91925751	LRRD1	chr7:91794589/-	-129497	1.41	0.6	0.21	0.11	0	0	0	0
chr7:91924086-91925751	CYP51A1	chr7:91764058/-	-160028	1.41	0.6	0.21	0.11	3965.2	2520.1	1647.77	2050.93
chr2:178075840-178078802	HNRNPA3	chr2:178077421/+	0	6.37	4.22	3.73	5.68	5956.59	6267.36	7682.84	9119.46
chr2:178075840-178078802	AGPS	chr2:178257470/+	-178668	6.37	4.22	3.73	5.68	2452.71	2827.68	3038.44	2888.58
chr2:178075840-178078802	NFE2L2	chr2:178098998/-	20196	6.37	4.22	3.73	5.68	2168.03	2612.61	2552.58	2289.65
chr22:36461208-36462872	APOL4	chr22:36597933/-	135061	3.04	1.89	0.94	1.79	20.8695	3.6554	0	0.4363
chr22:36461208-36462872	APOL3	chr22:36538105/-	75233	3.04	1.89	0.94	1.79	166.956	67.3629	3.3638	16.1422
chr22:36461208-36462872	APOL2	chr22:36629286/-	166414	3.04	1.89	0.94	1.79	1965.94	931.368	551.98	535.283
chr22:36461208-36462872	APOL1	chr22:36649116/+	-186244	3.04	1.89	0.94	1.79	413.732	95.7859	23.7049	65.4674
chr22:36461208-36462872	RBFOX2	chr22:36424584/-	-36624	3.04	1.89	0.94	1.79	0	0	0	0
chr2:68654239-68654958	CNRIP1	chr2:68547182/-	-107057	0.56	0.2	0.35	0.27	19.2219	3.1332	3.8443	19.1961
chr2:68654239-68654958	PLEK	chr2:68592321/+	61918	0.56	0.2	0.35	0.27	0	0	0	0.4363
chr2:68654239-68654958	APLF	chr2:68694690/+	-39732	0.56	0.2	0.35	0.27	41.1898	45.953	34.5988	22.6863
chr2:68654239-68654958	PPP3R1	chr2:68479650/-	-174589	0.56	0.2	0.35	0.27	1407.04	1242.82	1443.54	1912.19
chr2:68654239-68654958	FBXO48	chr2:68692309/-	37351	0.56	0.2	0.35	0.27	13.7299	14.0992	28.3518	22.6863
chr9:113017114-113020103	TXN	chr9:113018919/-	0	4.22	3.1	3.12	3.83	2727.86	2915.93	3038.44	3006.81
chr9:113017114-113020103	C9orf152	chr9:112970412/-	-46702	4.22	3.1	3.12	3.83	1.6476	1.0444	2.4027	0.8725
chr9:113017114-113020103	AKAP2	chr9:112898406/+	118708	4.22	3.1	3.12	3.83	2193.18	2668.48	3369.31	2901.93
chr9:113017114-113020103	TXNDC8	chr9:113100163/-	80060	4.22	3.1	3.12	3.83	0	0	0	0
chr16:66784524-66786458	CMTM1	chr16:66600349/+	184175	3.53	3.35	2.01	2.85	230.663	160.835	268.14	432.785
chr16:66784524-66786458	CDH16	chr16:66951980/-	165522	3.53	3.35	2.01	2.85	3.8444	1.5666	0	0.4363
chr16:66784524-66786458	RRAD	chr16:66959096/-	172638	3.53	3.35	2.01	2.85	136.201	158.747	12.494	10.9069
chr16:66784524-66786458	CA7	chr16:66878281/+	-91823	3.53	3.35	2.01	2.85	0.5492	0	0	0.4363
chr16:66784524-66786458	PDP2	chr16:66914382/+	-127924	3.53	3.35	2.01	2.85	479.998	430.809	636.713	711.564
chr16:66784524-66786458	CCDC79	chr16:66830732/-	44274	3.53	3.35	2.01	2.85	0.5492	0.5222	0	0.4363
chr16:66784524-66786458	FAM96B	chr16:66968325/-	181867	3.53	3.35	2.01	2.85	710.661	591.645	637.674	635.653
chr16:66784524-66786458	CES2	chr16:66968346/+	-181888	3.53	3.35	2.01	2.85	1359.81	1265.27	844.306	686.26
chr16:66784524-66786458	DYNC1LI2	chr16:66785524/-	0	3.53	3.35	2.01	2.85	3429.19	3913.84	3267.18	2956.64
chr16:66784524-66786458	NAE1	chr16:66857502/-	71044	3.53	3.35	2.01	2.85	1581.14	1597.39	2310.43	2873.74
chr16:66784524-66786458	CMTM2	chr16:66613350/+	171174	3.53	3.35	2.01	2.85	1.0984	0.5222	0.4805	1.7451
chr16:66784524-66786458	CMTM3	chr16:66638633/+	145891	3.53	3.35	2.01	2.85	574.46	252.742	205.67	354.255
chr16:66784524-66786458	CKLF-CMTM1	chr16:66586465/+	198059	3.53	3.35	2.01	2.85	0	0	0	0
chr16:66784524-66786458	CKLF	chr16:66586465/+	198059	3.53	3.35	2.01	2.85	198.809	140.992	244.594	383.486
chr16:66784524-66786458	CMTM4	chr16:66730609/-	-53915	3.53	3.35	2.01	2.85	1485.03	1238.12	1173.47	1321.91
chrX:135332891-135333830	MAP7D3	chrX:135333737/-	0	0.76	0.6	0.56	0.63	804.574	793.212	920.711	963.295
chrX:135332891-135333830	FHL1	chrX:135288565/+	44326	0.76	0.6	0.56	0.63	104.347	16.7102	6.247	4.3627
chrX:135332891-135333830	ADGRG4	chrX:135383121/+	-49291	0.76	0.6	0.56	0.63	0	0	0	0
chr19:8477692-8510964	NDUFA7	chr19:8386279/-	-91413	4.67	3.54	0.92	2.07	530.524	540.992	498.318	510.442
chr19:8477692-8510964	CERS4	chr19:8315959/+	161733	4.67	3.54	0.92	2.07	0	0	0	0
chr19:8477692-8510964	ZNF414	chr19:8579047/-	68083	4.67	3.54	0.92	2.07	168.603	185.379	157.136	121.721
chr19:8477692-8510964	MYO1F	chr19:8642330/-	131366	4.67	3.54	0.92	2.07	7.1396	6.7885	2.4027	0.8725
chr19:8477692-8510964	RPS28	chr19:8386383/+	91309	4.67	3.54	0.92	2.07	685.947	959.791	805.382	631.29
chr19:8477692-8510964	RAB11B	chr19:8455204/+	22488	4.67	3.54	0.92	2.07	1168.1	1035.95	789.476	876.398
chr19:8477692-8510964	ADAMTS10	chr19:8657079/-	146115	4.67	3.54	0.92	2.07	1.6476	0.5222	0	0
chr19:8477692-8510964	ANGPTL4	chr19:8429010/+	48682	4.67	3.54	0.92	2.07	36.247	45.4308	194.137	75.9118
chr19:8477692-8510964	HNRNPM	chr19:8509802/+	0	4.67	3.54	0.92	2.07	5812.7	5451.7	7211.44	8455.88
chr19:8477692-8510964	2016-03-02	chr19:8483420/+	0	4.67	3.54	0.92	2.07	377.848	438.12	163.863	58.8971
chr19:8477692-8510964	CD320	chr19:8373239/-	-104453	4.67	3.54	0.92	2.07	715.604	1091.91	1482.94	1256.91
chr19:8477692-8510964	PRAM1	chr19:8567537/-	56573	4.67	3.54	0.92	2.07	0.5492	0	0	0
chr19:8477692-8510964	KANK3	chr19:8408145/-	-69547	4.67	3.54	0.92	2.07	26.3615	14.6214	12.494	20.5049
chr7:80160559-80194720	CD36	chr7:80231503/+	-36783	53.1	10.53	0.53	15.21	326.223	10.9661	1.9222	34.0294
chr17:40669164-40689757	EZH1	chr17:40880969/-	191212	25.01	11.07	7.4	12.77	431.12	472.585	363.767	367.78
chr17:40669164-40689757	COASY	chr17:40714091/+	-24334	25.01	11.07	7.4	12.77	1817.29	1463.19	1590.1	1727.21
chr17:40669164-40689757	STAT3	chr17:40540512/-	-128652	25.01	11.07	7.4	12.77	5806.66	6532.64	3571.84	2534.76
chr17:40669164-40689757	TUBG1	chr17:40761357/+	-71600	25.01	11.07	7.4	12.77	1006.51	1086.78	1815.06	2051.51
chr17:40669164-40689757	CCR10	chr17:40833844/-	144087	25.01	11.07	7.4	12.77	13.1807	6.7885	2.4027	4.799
chr17:40669164-40689757	PLEKHH3	chr17:40829047/-	139290	25.01	11.07	7.4	12.77	786.45	811.488	413.263	313.682
chr17:40669164-40689757	PSMC3IP	chr17:40726227/-	36470	25.01	11.07	7.4	12.77	58.451	28.376	216.766	554.431
chr17:40669164-40689757	CNTNAP1	chr17:40834631/+	-144874	25.01	11.07	7.4	12.77	1784.34	816.71	397.886	471.613
chr17:40669164-40689757	TUBG2	chr17:40811265/+	-121508	25.01	11.07	7.4	12.77	334.631	290.245	263.263	191.813
chr17:40669164-40689757	ATP6V0A1	chr17:40612865/+	56299	25.01	11.07	7.4	12.77	1383.98	1998.43	1355.6	905.27
chr17:40669164-40689757	PTRF	chr17:40575337/-	-93827	25.01	11.07	7.4	12.77	15251.2	19250.7	15313.8	11062.6
chr17:40669164-40689757	HSD17B1	chr17:40703983/+	-14226	25.01	11.07	7.4	12.77	56.419	55.1697	26.0692	29.1388
chr17:40669164-40689757	MLX	chr17:40719077/+	-29320	25.01	11.07	7.4	12.77	1282.14	891.206	1061.47	1330.28
chr17:40669164-40689757	FAM134C	chr17:40761444/-	71687	25.01	11.07	7.4	12.77	1167.04	1785.38	1178.28	558.432
chr17:40669164-40689757	NAGLU	chr17:40687950/+	0	25.01	11.07	7.4	12.77	553.591	476.762	395.964	254.348
chr2:227655705-227668008	IRS1	chr2:227663505/-	0	9.92	4.73	2.96	9.88	356.429	72.0627	70.1586	211.157
chr2:227655705-227668008	RHBDD1	chr2:227700670/+	-32662	9.92	4.73	2.96	9.88	283.386	250.131	265.257	268.745
chr19:42363031-42389059	LYPD4	chr19:42348735/-	-14296	7.93	5.73	6.13	9.7	0	0	0	0
chr19:42363031-42389059	DMRTC2	chr19:42351492/+	11539	7.93	5.73	6.13	9.7	0	0	0	0
chr19:42363031-42389059	ZNF574	chr19:42580289/+	-191230	7.93	5.73	6.13	9.7	264.164	296.606	324.844	401.809
chr19:42363031-42389059	RABAC1	chr19:42463527/-	74468	7.93	5.73	6.13	9.7	773.819	561.88	283.037	210.721
chr19:42363031-42389059	GRIK5	chr19:42569956/-	180897	7.93	5.73	6.13	9.7	2.746	2.0888	0.9611	0.4363
chr19:42363031-42389059	ARHGEF1	chr19:42388445/+	0	7.93	5.73	6.13	9.7	1771.16	1156.14	1534.36	1998.58
chr19:42363031-42389059	CEACAM3	chr19:42300521/+	62510	7.93	5.73	6.13	9.7	0	0	0	0
chr19:42363031-42389059	CEACAM5	chr19:42212529/+	150502	7.93	5.73	6.13	9.7	0	0	0	0
chr19:42363031-42389059	CEACAM7	chr19:42192205/-	-170826	7.93	5.73	6.13	9.7	0	0	0	0
chr19:42363031-42389059	CEACAM6	chr19:42259427/+	103604	7.93	5.73	6.13	9.7	0	0	0	0
chr19:42363031-42389059	ATP1A3	chr19:42497618/-	108559	7.93	5.73	6.13	9.7	1.6476	2.611	5.2859	2.1814
chr19:42363031-42389059	RPS19	chr19:42363987/+	0	7.93	5.73	6.13	9.7	8477.41	7269.45	5938.49	7556.28
chr19:42363031-42389059	CD79A	chr19:42381189/+	0	7.93	5.73	6.13	9.7	1.6476	1.0444	1.4416	0.4363
chr11:111990788-111991716	IL18	chr11:112025783/-	34067	0.3	0.33	0.36	0.73	1814.55	2840.21	1543.97	1111.19
chr11:111990788-111991716	PLET1	chr11:112131582/-	139866	0.3	0.33	0.36	0.73	0	0	0	0
chr11:111990788-111991716	PTS	chr11:112097087/+	-105371	0.3	0.33	0.36	0.73	200.457	172.324	224.892	289.25
chr11:111990788-111991716	TEX12	chr11:112038094/+	-46378	0.3	0.33	0.36	0.73	1.0984	1.5666	0	0
chr11:111990788-111991716	PIH1D2	chr11:111944894/-	-45894	0.3	0.33	0.36	0.73	16.4759	4.1775	7.6886	8.9305
chr11:111990788-111991716	DLAT	chr11:111895537/+	95251	0.3	0.33	0.36	0.73	1224.16	1059.53	1280.63	1489.24
chr11:111990788-111991716	BCO2	chr11:112046207/+	-54491	0.3	0.33	0.36	0.73	65.9036	61.0966	7.6886	17.8873
chr11:111990788-111991716	DIXDC1	chr11:111848032/+	142756	0.3	0.33	0.36	0.73	717.251	586.945	195.099	241.696
chr11:111990788-111991716	C11orf57	chr11:111948938/+	41850	0.3	0.33	0.36	0.73	556.337	509.661	496.396	584.172
chr11:111990788-111991716	SDHD	chr11:111957547/+	33241	0.3	0.33	0.36	0.73	772.171	594.778	667.948	755.192
chr11:111990788-111991716	TIMM8B	chr11:111957521/-	-33267	0.3	0.33	0.36	0.73	317.985	217.755	248.919	293.613
chr15:34329884-34332223	PGBD4	chr15:34394273/+	-62050	4.09	2.81	1.84	4.05	68.6496	50.1305	47.5733	70.6765
chr15:34329884-34332223	AVEN	chr15:34331302/-	0	4.09	2.81	1.84	4.05	324.575	359.269	318.597	285.76
chr15:34329884-34332223	KATNBL1	chr15:34455890/-	123667	4.09	2.81	1.84	4.05	0	0	0	0
chr15:34329884-34332223	CHRM5	chr15:34338740/+	-6517	4.09	2.81	1.84	4.05	0	0	0	1.3088
chr15:34329884-34332223	EMC7	chr15:34394052/-	61829	4.09	2.81	1.84	4.05	0	0	0	0
chr15:34329884-34332223	EMC4	chr15:34517197/+	-184974	4.09	2.81	1.84	4.05	0	0	0	0
chr2:109149821-109151868	LIMS1	chr2:109150810/+	0	3.35	3.24	2.07	2.21	1104.31	668.71	559.318	752.491
chr2:109149821-109151868	GCC2	chr2:109065576/+	84245	3.35	3.24	2.07	2.21	1820.63	1704.44	997.684	917.892
chr2:109149821-109151868	SULT1C4	chr2:108994420/+	155401	3.35	3.24	2.07	2.21	0	0	0	0
chr2:109149821-109151868	RANBP2	chr2:109335936/+	-184068	3.35	3.24	2.07	2.21	4202.37	5535.86	6063.78	5313.35
chr4:90409953-90414839	GPRIN3	chr4:90229160/-	-180793	1.34	0.35	1.67	4.85	0	0.5222	0	0
chr1:244465960-244466838	C1orf100	chr1:244515936/+	-49098	0.09	0.65	0.53	0.2	0	0.5222	0	0
chr1:244465960-244466838	C1orf101	chr1:244624672/+	-157834	0.09	0.65	0.53	0.2	5.492	6.2663	0.4805	1.7451
chr1:244465960-244466838	ADSS	chr1:244615435/-	148597	0.09	0.65	0.53	0.2	1212.08	1132.11	1411.82	1850.24
chr5:176972084-176982318	RGS14	chr5:176784843/+	187241	4.44	2.71	1.25	2.33	110.938	25.5875	19.2215	28.3579
chr5:176972084-176982318	PDLIM7	chr5:176924605/-	-47479	4.44	2.71	1.25	2.33	1571.8	1357.7	1484.86	1131.26
chr5:176972084-176982318	GRK6	chr5:176853686/+	118398	4.44	2.71	1.25	2.33	485.49	622.976	885.151	874.295
chr5:176972084-176982318	DDX41	chr5:176943966/-	-28118	4.44	2.71	1.25	2.33	1264.8	1421.93	1350.79	1333.26
chr5:176972084-176982318	FAM153A	chr5:177175699/-	193381	4.44	2.71	1.25	2.33	11.9395	2.0888	0	0.5584
chr5:176972084-176982318	TMED9	chr5:177019212/+	-36894	4.44	2.71	1.25	2.33	2568.05	2098.17	1961.08	1938.37
chr5:176972084-176982318	PRR7	chr5:176881829/+	90255	4.44	2.71	1.25	2.33	183.981	206.788	347.91	220.319
chr5:176972084-176982318	SLC34A1	chr5:176812695/+	159389	4.44	2.71	1.25	2.33	0	0	0	0
chr5:176972084-176982318	DOK3	chr5:176937426/-	-34658	4.44	2.71	1.25	2.33	35.1486	18.799	43.729	85.0736
chr5:176972084-176982318	PFN3	chr5:176827636/-	-144448	4.44	2.71	1.25	2.33	0	0	0	0
chr5:176972084-176982318	FAM193B	chr5:176981547/-	0	4.44	2.71	1.25	2.33	303.706	335.248	275.829	277.471
chr5:176972084-176982318	LMAN2	chr5:176778884/-	-193200	4.44	2.71	1.25	2.33	2581.23	2221.41	1933.21	1919.17
chr5:176972084-176982318	F12	chr5:176836576/-	-135508	4.44	2.71	1.25	2.33	8.7872	6.2663	18.2605	31.4118
chr5:176972084-176982318	DBN1	chr5:176900693/-	-71391	4.44	2.71	1.25	2.33	3892.16	3617.75	2134.55	2402.13
chr5:176972084-176982318	B4GALT7	chr5:177027118/+	-44800	4.44	2.71	1.25	2.33	297.665	297.65	292.167	229.481
chr17:76966907-76977159	RBFOX3	chr17:77111829/-	134670	3.05	1.42	0.99	2.03	0	0	0	0
chr17:76966907-76977159	TIMP2	chr17:76921471/-	-45436	3.05	1.42	0.99	2.03	10051.4	10444.4	5123.5	3901.61
chr17:76966907-76977159	C1QTNF1	chr17:77019015/+	-41856	3.05	1.42	0.99	2.03	79.0844	18.2768	24.988	42.3187
chr17:76966907-76977159	LGALS3BP	chr17:76973295/-	0	3.05	1.42	0.99	2.03	4588.54	3963.97	2270.06	2096.74
chr17:76966907-76977159	CANT1	chr17:76993725/-	16566	3.05	1.42	0.99	2.03	1131.9	1205.74	1463.24	1396.08
chr17:76966907-76977159	CYTH1	chr17:76778423/-	-188484	3.05	1.42	0.99	2.03	927.045	796.345	580.49	566.721
chr17:76966907-76977159	CEP295NL	chr17:76899298/-	-67609	3.05	1.42	0.99	2.03	0	0	0	0
chr17:76966907-76977159	USP36	chr17:76836968/-	-129939	3.05	1.42	0.99	2.03	993.497	854.308	1585.3	2280.41
chr17:76966907-76977159	ENGASE	chr17:77071018/+	-93859	3.05	1.42	0.99	2.03	424.529	288.251	278.232	487.755
chr20:32398402-32400857	RALY	chr20:32581457/+	-180600	2.78	2.63	1.93	2.16	2025.44	2071.54	2190.77	1956.26
chr20:32398402-32400857	E2F1	chr20:32274209/-	-124193	2.78	2.63	1.93	2.16	122.471	78.8512	385.392	773.515
chr20:32398402-32400857	PXMP4	chr20:32308135/-	-90267	2.78	2.63	1.93	2.16	220.228	132.115	77.8472	95.9805
chr20:32398402-32400857	CHMP4B	chr20:32399109/+	0	2.78	2.63	1.93	2.16	1849.15	1628.2	1381.07	1571.03
chr20:32398402-32400857	ZNF341	chr20:32328707/+	69695	2.78	2.63	1.93	2.16	92.2651	96.6057	72.0807	92.4903
chr20:32398402-32400857	C20orf144	chr20:32250091/+	148311	2.78	2.63	1.93	2.16	0	0.6684	0	0
chr20:32398402-32400857	ACTL10	chr20:32254303/+	144099	2.78	2.63	1.93	2.16	0	0	0	0
chr20:32398402-32400857	NECAB3	chr20:32262263/-	-136139	2.78	2.63	1.93	2.16	398.168	401.943	250.841	197.196
chr17:71187350-71190314	SLC39A11	chr17:71088852/-	-98498	2.24	2.2	2.14	3.12	352.035	209.399	112.927	136.554
chr17:71187350-71190314	C17orf80	chr17:71228371/+	-38057	2.24	2.2	2.14	3.12	617.298	557.196	603.075	712.485
chr17:71187350-71190314	CDC42EP4	chr17:71282750/-	92436	2.24	2.2	2.14	3.12	1820.59	2291.38	2813.07	2038.71
chr17:71187350-71190314	CPSF4L	chr17:71258018/-	67704	2.24	2.2	2.14	3.12	0	0	0	0
chr17:71187350-71190314	SSTR2	chr17:71165366/+	21984	2.24	2.2	2.14	3.12	0	0.5222	2.4027	1.7451
chr17:71187350-71190314	FAM104A	chr17:71223855/-	33541	2.24	2.2	2.14	3.12	946.958	910.376	985.223	1059.94
chr17:71187350-71190314	COG1	chr17:71189172/+	0	2.24	2.2	2.14	3.12	542.464	741.828	704.829	584.77
chr7:36140302-36140940	EEPD1	chr7:36192835/+	-51895	0.27	0.57	0.03	0.17	74.6908	60.0522	25.4685	23.9951
chr6:13267228-13270091	LOC100130357	chr6:13295619/-	25528	2.36	1.81	0.63	0.02	0	0	0	0
chr6:13267228-13270091	GFOD1	chr6:13365893/-	95802	2.36	1.81	0.63	0.02	143.34	160.835	108.121	123.466
chr6:13267228-13270091	TBC1D7	chr6:13327137/-	57046	2.36	1.81	0.63	0.02	402.248	622.465	540.533	250.858
chr8:143743359-143764710	THEM6	chr8:143808620/+	-43910	20.02	16.25	10.4	13.82	0	0	0	0
chr8:143743359-143764710	LY6D	chr8:143868007/-	103297	20.02	16.25	10.4	13.82	14.8283	11.4883	0	0.8725
chr8:143743359-143764710	LYPD2	chr8:143833951/-	69241	20.02	16.25	10.4	13.82	0	1.0444	0	0
chr8:143743359-143764710	GML	chr8:143916216/+	-151506	20.02	16.25	10.4	13.82	0	0	0	0
chr8:143743359-143764710	LY6K	chr8:143781528/+	-16818	20.02	16.25	10.4	13.82	676.611	258.486	523.306	1362.92
chr8:143743359-143764710	SLURP1	chr8:143823828/-	59118	20.02	16.25	10.4	13.82	0	0	0	0
chr8:143743359-143764710	JRK	chr8:143747938/-	0	20.02	16.25	10.4	13.82	703.521	677.807	594.426	832.849
chr8:143743359-143764710	LYNX1	chr8:143851245/-	86535	20.02	16.25	10.4	13.82	0.5492	0	0.4805	0
chr8:143743359-143764710	ARC	chr8:143695832/-	-47527	20.02	16.25	10.4	13.82	4.3936	4.1775	13.9356	10.9069
chr8:143743359-143764710	CYP11B1	chr8:143961235/-	196525	20.02	16.25	10.4	13.82	0	0	0	0
chr8:143743359-143764710	PSCA	chr8:143761873/+	0	20.02	16.25	10.4	13.82	163.112	761.295	124.666	37.3408
chr8:143743359-143764710	ADGRB1	chr8:143545376/+	197983	20.02	16.25	10.4	13.82	0	0	0	0
chr16:27560740-27562022	GTF3C1	chr16:27561250/-	0	0.78	0.87	0.75	0.69	2875.05	4255.87	3782.8	2622.89
chr16:27560740-27562022	IL21R	chr16:27441376/+	119364	0.78	0.87	0.75	0.69	103.271	27.2167	5.2859	18.7598
chr16:27560740-27562022	KIAA0556	chr16:27561467/+	0	0.78	0.87	0.75	0.69	422.332	526.371	350.312	244.75
chr10:35895368-35895803	FZD8	chr10:35930361/-	34558	0.11	0.25	0.46	0.31	63.1577	61.0966	62.47	26.1765
chr10:35895368-35895803	GJD4	chr10:35894337/+	1031	0.11	0.25	0.46	0.31	0	0	0	0
chr10:35895368-35895803	CCNY	chr10:35790428/+	104940	0.11	0.25	0.46	0.31	1795.33	1878.33	1847.67	1520.42
chrX:16803696-16806047	CTPS2	chrX:16731101/-	-72595	1.85	1.73	1.17	1.27	674.414	319.582	175.396	432.785
chrX:16803696-16806047	TXLNG	chrX:16804554/+	0	1.85	1.73	1.17	1.27	614.552	589.034	786.16	1162.24
chrX:16803696-16806047	RBBP7	chrX:16887977/-	81930	1.85	1.73	1.17	1.27	7846.38	8046.48	5342.14	6106.1
chrX:16803696-16806047	SYAP1	chrX:16737706/+	65990	1.85	1.73	1.17	1.27	2733.9	3824.02	3278.71	2223.26
chrX:16803696-16806047	REPS2	chrX:16964813/+	-158766	1.85	1.73	1.17	1.27	65.3545	53.2637	18.741	7.4167
chrX:16803696-16806047	S100G	chrX:16669121/+	134575	1.85	1.73	1.17	1.27	0	0	0.4805	0.4363
chr7:108164722-108167748	NRCAM	chr7:108096840/-	-67882	4.1	3.14	1.02	1.85	3780.12	2487.21	1132.15	983.8
chr7:108164722-108167748	DNAJB9	chr7:108210188/+	-42440	4.1	3.14	1.02	1.85	504.163	404.7	252.763	208.976
chr7:108164722-108167748	PNPLA8	chr7:108166761/-	0	4.1	3.14	1.02	1.85	1678.9	2392.69	1673.23	789.658
chr7:108164722-108167748	THAP5	chr7:108205548/-	37800	4.1	3.14	1.02	1.85	823.246	839.164	889.957	1067.56
chr1:157107592-157109290	ARHGEF11	chr1:157015161/-	-92431	3.19	1.35	1.69	2.03	1077.52	1226.63	991.35	863.824
chr1:157107592-157109290	ETV3	chr1:157108176/-	0	3.19	1.35	1.69	2.03	198.26	221.41	225.372	171.02
chr1:157107592-157109290	ETV3L	chr1:157069599/-	-37993	3.19	1.35	1.69	2.03	0	0	0	0
chr3:49447100-49450817	NICN1	chr3:49466756/-	15939	6.44	4.83	3.6	2.62	187.49	93.9948	54.5891	71.9854
chr3:49447100-49450817	USP4	chr3:49377535/-	-69565	6.44	4.83	3.6	2.62	1132.99	1127.94	925.036	796.202
chr3:49447100-49450817	CCDC36	chr3:49249198/+	197902	6.44	4.83	3.6	2.62	0	0	0	0.4363
chr3:49447100-49450817	C3orf62	chr3:49314507/-	-132593	6.44	4.83	3.6	2.62	180.686	128.459	85.0553	90.3089
chr3:49447100-49450817	GPX1	chr3:49395790/-	-51310	6.44	4.83	3.6	2.62	3123.83	2934.2	3047.09	2327.96
chr3:49447100-49450817	BSN	chr3:49591921/+	-141104	6.44	4.83	3.6	2.62	43.3866	96.0836	56.7035	25.3039
chr3:49447100-49450817	DAG1	chr3:49506135/+	-55318	6.44	4.83	3.6	2.62	8505.96	12100.8	7562.23	4535.51
chr3:49447100-49450817	RHOA	chr3:49449525/-	0	6.44	4.83	3.6	2.62	22876.8	41157.7	23318.1	12626.7
chr3:49447100-49450817	AMT	chr3:49460110/-	9293	6.44	4.83	3.6	2.62	24.4997	16.7102	12.2057	10.0343
chr3:49447100-49450817	TCTA	chr3:49449638/+	0	6.44	4.83	3.6	2.62	1073.68	722.715	365.209	277.907
chr1:192774618-192779002	RGS13	chr1:192613460/+	161158	1.97	3.75	2.08	2.7	0	0	0	0
chr1:192774618-192779002	RGS2	chr1:192778168/+	0	1.97	3.75	2.08	2.7	124.668	82.5065	168.188	181.49
chr10:126431171-126433830	ZRANB1	chr10:126630691/+	-196861	2.77	1.89	1.59	2.4	1434.5	1330.55	982.22	981.182
chr10:126431171-126433830	FAM175B	chr10:126490353/+	-56523	2.77	1.89	1.59	2.4	627.732	580.679	631.908	682.334
chr10:126431171-126433830	FAM53B	chr10:126432929/-	0	2.77	1.89	1.59	2.4	717.74	738.757	606.708	759.481
chr10:126431171-126433830	METTL10	chr10:126477725/-	43895	2.77	1.89	1.59	2.4	227.977	88.9191	129.476	313.756
chr8:132851084-132874118	EFR3A	chr8:132916355/+	-42237	55.74	14.62	8.37	16.67	2568.59	2289.82	2095.63	1428.8
chr8:132851084-132874118	OC90	chr8:133067319/-	193201	55.74	14.62	8.37	16.67	0	0	0	0
chr4:41288675-41299734	LIMCH1	chr4:41361623/+	-61889	1.05	2.85	0.34	0.71	5013.62	5187.99	2788.56	3287.77
chr4:41288675-41299734	UCHL1	chr4:41258897/+	29778	1.05	2.85	0.34	0.71	0	0	0	0
chr4:41288675-41299734	APBB2	chr4:41216634/-	-72041	1.05	2.85	0.34	0.71	2322.01	2386.42	1673.71	1612.47
chr12:93984413-93986193	MRPL42	chr12:93862967/+	121446	2.73	1.37	0.48	1.58	1394.41	1421.41	1719.37	1858.53
chr12:93984413-93986193	UBE2N	chr12:93836025/-	-148388	2.73	1.37	0.48	1.58	1824.43	1601.04	2226.81	2605.43
chr12:93984413-93986193	NUDT4	chr12:93788384/+	196029	2.73	1.37	0.48	1.58	2845.39	1959.79	2938.49	2942.67
chr12:93984413-93986193	CRADD	chr12:94071150/+	-84957	2.73	1.37	0.48	1.58	391.577	184.334	95.6271	180.182
chr12:93984413-93986193	SOCS2	chr12:93966460/+	17953	2.73	1.37	0.48	1.58	296.566	28.1984	23.0658	181.927
chr1:10165155-10170246	UBE4B	chr1:10093040/+	72115	5.91	2.57	0.84	1.23	3104.61	3248.56	2069.68	1803.56
chr1:10165155-10170246	KIF1B	chr1:10270763/+	-100517	5.91	2.57	0.84	1.23	3966.3	5263.71	4594.43	2964.92
chr1:10165155-10170246	CTNNBIP1	chr1:9970315/-	-194840	5.91	2.57	0.84	1.23	270.754	468.93	297.453	89.0001
chr1:10165155-10170246	RBP7	chr1:10057254/+	107901	5.91	2.57	0.84	1.23	0	0	0	0
chr1:10165155-10170246	NMNAT1	chr1:10032075/+	133080	5.91	2.57	0.84	1.23	359.175	279.373	186.929	190.216
chr1:10165155-10170246	LZIC	chr1:10002825/-	-162330	5.91	2.57	0.84	1.23	358.626	276.24	367.612	446.309
chr20:47894075-47908582	STAU1	chr20:47804903/-	-89172	10.58	13.2	15.41	12.01	3831.2	5055.87	4606.44	3613.23
chr20:47894075-47908582	KCNB1	chr20:48099180/-	190598	10.58	13.2	15.41	12.01	253.18	45.4308	5.2859	12.652
chr20:47894075-47908582	DDX27	chr20:47835831/+	58244	10.58	13.2	15.41	12.01	1141.78	1267.89	1585.3	1865.95
chr20:47894075-47908582	ZNFX1	chr20:47894755/-	0	10.58	13.2	15.41	12.01	2106.72	1821.93	1865.93	1579.32
chr16:71917078-71930669	ATXN1L	chr16:71883526/+	33552	6.62	5.97	3.16	3.94	1250.97	1077.28	969.726	1140.42
chr16:71917078-71930669	AP1G1	chr16:71842975/-	-74103	6.62	5.97	3.16	3.94	4369.41	4964.49	4813.07	3719.24
chr16:71917078-71930669	DHODH	chr16:72042642/+	-111973	6.62	5.97	3.16	3.94	143.89	109.138	200.384	351.201
chr16:71917078-71930669	DHX38	chr16:72127614/+	-196945	6.62	5.97	3.16	3.94	1913.95	2123.76	2200.86	2147.78
chr16:71917078-71930669	IST1	chr16:71929395/+	0	6.62	5.97	3.16	3.94	0	0	0	0
chr16:71917078-71930669	ZNF821	chr16:71918092/-	0	6.62	5.97	3.16	3.94	39.641	31.3316	18.741	20.0686
chr16:71917078-71930669	HPR	chr16:72097124/+	-166455	6.62	5.97	3.16	3.94	6.5904	0	0.4805	0
chr16:71917078-71930669	PHLPP2	chr16:71758603/-	-158475	6.62	5.97	3.16	3.94	546.923	652.59	992.792	749.438
chr16:71917078-71930669	TXNL4B	chr16:72124684/-	194015	6.62	5.97	3.16	3.94	357.527	481.462	643.441	577.628
chr16:71917078-71930669	HP	chr16:72088507/+	-157838	6.62	5.97	3.16	3.94	0	0	0	0.8725
chr15:83938608-83957849	TM6SF1	chr15:83776323/+	162285	5.28	6.85	3.72	3.5	35.1486	40.2089	51.8981	55.8432
chr15:83938608-83957849	HDGFRP3	chr15:83876769/-	-61839	5.28	6.85	3.72	3.5	670.57	501.305	627.102	1079.78
chr15:83938608-83957849	BNC1	chr15:83952208/-	0	5.28	6.85	3.72	3.5	681.004	671.018	908.217	965.04
chr15:83938608-83957849	SH3GL3	chr15:84115979/+	-158130	5.28	6.85	3.72	3.5	1.6476	5.7441	3.8443	1.3088
chr2:211340830-211343004	LANCL1	chr2:211341490/-	0	1.83	1.82	0.91	1.48	3430.28	3069.45	1983.18	1944.91
chr2:211340830-211343004	CPS1	chr2:211342405/+	0	1.83	1.82	0.91	1.48	1726.68	1458.49	842.864	951.079
chr2:211340830-211343004	MYL1	chr2:211179894/-	-160936	1.83	1.82	0.91	1.48	7.6888	2.611	0	0
chr9:110250653-110253183	KLF4	chr9:110252046/-	0	2.02	1.91	2.29	2.66	82.3796	88.7728	252.283	322.844
chr9:110250653-110253183	RAD23B	chr9:110064315/+	186338	2.02	1.91	2.29	2.66	5844.56	5490.34	5877.46	6756.59
chr10:99599633-99600639	ZFYVE27	chr10:99504485/+	95148	0.84	0.49	0.4	0.25	358.626	375.979	322.922	360.799
chr10:99599633-99600639	SFRP5	chr10:99531755/-	-67878	0.84	0.49	0.4	0.25	1.6476	0.5222	0	0.4363
chr10:99599633-99600639	CRTAC1	chr10:99790584/-	189945	0.84	0.49	0.4	0.25	0.5492	0	0	0
chr10:99599633-99600639	MARVELD1	chr10:99473464/+	126169	0.84	0.49	0.4	0.25	1490.62	1666.84	1003.09	770.405
chr10:99599633-99600639	GOLGA7B	chr10:99609994/+	-9355	0.84	0.49	0.4	0.25	19.7711	8.8773	8.6497	3.9265
chr10:99599633-99600639	PI4K2A	chr10:99400442/+	199191	0.84	0.49	0.4	0.25	1356.27	1451.58	1058.63	797.934
chr10:99599633-99600639	AVPI1	chr10:99447014/-	-152619	0.84	0.49	0.4	0.25	472.859	603.655	392.119	392.211
chrX:131623454-131624264	MBNL3	chrX:131623995/-	0	0.2	0.04	0.13	0.62	12.6315	4.1775	6.247	25.7402
chrX:153596391-153608266	SLC10A3	chrX:153717420/-	109154	9.9	6.03	5.9	8.74	670.57	733.682	932.725	626.927
chrX:153596391-153608266	EMD	chrX:153607596/+	0	9.9	6.03	5.9	8.74	1387.27	1525.85	1446.9	1500.35
chrX:153596391-153608266	UBL4A	chrX:153715008/-	106742	9.9	6.03	5.9	8.74	855.649	562.402	780.394	1195.39
chrX:153596391-153608266	FAM50A	chrX:153672472/+	-64206	9.9	6.03	5.9	8.74	1208.23	1408.88	1125.42	909.633
chrX:153596391-153608266	LAGE3	chrX:153707595/-	99329	9.9	6.03	5.9	8.74	194.416	454.83	316.194	157.059
chrX:153596391-153608266	PLXNA3	chrX:153686620/+	-78354	9.9	6.03	5.9	8.74	1143.98	2072.06	1111	504.334
chrX:153596391-153608266	FAM3A	chrX:153741259/-	132993	9.9	6.03	5.9	8.74	464.621	391.645	357.04	284.887
chrX:153596391-153608266	G6PD	chrX:153774377/-	166111	9.9	6.03	5.9	8.74	4942.18	11237.6	6793.33	2397.71
chrX:153596391-153608266	ATP6AP1	chrX:153656977/+	-48711	9.9	6.03	5.9	8.74	2325.3	2456.92	1355.12	1051.86
chrX:153596391-153608266	TAZ	chrX:153639853/+	-31587	9.9	6.03	5.9	8.74	231.673	179.3	182.451	199.814
chrX:153596391-153608266	OPN1MW2	chrX:153485202/+	111189	9.9	6.03	5.9	8.74	0	0	0	0
chrX:153596391-153608266	OPN1LW	chrX:153409697/+	186694	9.9	6.03	5.9	8.74	0	0	0	0
chrX:153596391-153608266	RPL10	chrX:153626405/+	-18139	9.9	6.03	5.9	8.74	11540.2	13731.8	11420.8	9494.87
chrX:153596391-153608266	IKBKG	chrX:153770458/+	-162192	9.9	6.03	5.9	8.74	445.284	349.838	404.748	443.657
chrX:153596391-153608266	DNASE1L1	chrX:153633995/-	25729	9.9	6.03	5.9	8.74	598.619	488.768	293.676	229.708
chrX:153596391-153608266	OPN1MW	chrX:153485202/+	111189	9.9	6.03	5.9	8.74	0	0	0	0
chrX:153596391-153608266	FLNA	chrX:153603005/-	0	9.9	6.03	5.9	8.74	61438.7	89496.6	72720.8	41465.8
chrX:153596391-153608266	GDI1	chrX:153665258/+	-56992	9.9	6.03	5.9	8.74	1943.06	2288.77	1838.54	1521.73
chrX:153596391-153608266	TEX28	chrX:153523563/-	-72828	9.9	6.03	5.9	8.74	0	0	0	0
chrX:153596391-153608266	TKTL1	chrX:153533408/+	62983	9.9	6.03	5.9	8.74	18.6727	3.1332	0	0.8725
chr4:149232086-149233543	NR3C2	chr4:149358013/-	124470	0.92	0.54	0.18	0.03	345.445	298.172	245.075	223.373
chr7:100099460-100114771	MOSPD3	chr7:100209724/+	-94953	12.41	9.46	5.56	5.69	288.329	254.83	118.693	70.2403
chr7:100099460-100114771	TFR2	chr7:100231272/-	116501	12.41	9.46	5.56	5.69	0	1.0444	0	0
chr7:100099460-100114771	MEPCE	chr7:100028652/+	70808	12.41	9.46	5.56	5.69	912.216	1113.84	1539.16	1613.34
chr7:100099460-100114771	GIGYF1	chr7:100286869/-	172098	12.41	9.46	5.56	5.69	804.574	778.59	765.978	1031.79
chr7:100099460-100114771	PILRA	chr7:99971067/+	128393	12.41	9.46	5.56	5.69	17.7116	17.1802	12.5084	21.8748
chr7:100099460-100114771	TSC22D4	chr7:100076901/-	-22559	12.41	9.46	5.56	5.69	2251.16	2992.69	1575.68	1112.06
chr7:100099460-100114771	C7orf61	chr7:100061893/-	-37567	12.41	9.46	5.56	5.69	4.3936	21.9321	13.9356	3.4902
chr7:100099460-100114771	PPP1R35	chr7:100034093/-	-65367	12.41	9.46	5.56	5.69	0	0	0	0
chr7:100099460-100114771	SPDYE3	chr7:99905324/+	194136	12.41	9.46	5.56	5.69	64.8602	78.3238	80.37	72.3344
chr7:100099460-100114771	GNB2	chr7:100271362/+	-156591	12.41	9.46	5.56	5.69	4428.73	5794.26	5101.39	3468.39
chr7:100099460-100114771	LRCH4	chr7:100183810/-	69039	12.41	9.46	5.56	5.69	646.405	817.232	880.827	514.368
chr7:100099460-100114771	NYAP1	chr7:100082850/+	16610	12.41	9.46	5.56	5.69	0	0	0	0
chr7:100099460-100114771	PILRB	chr7:99955625/+	143835	12.41	9.46	5.56	5.69	669.257	619.629	491.514	723.261
chr7:100099460-100114771	POP7	chr7:100303675/+	-188904	12.41	9.46	5.56	5.69	383.889	253.264	545.891	891.31
chr7:100099460-100114771	ZASP	chr7:100172355/-	57584	12.41	9.46	5.56	5.69	0	0	0	0
chr7:100099460-100114771	ACTL6B	chr7:100254083/-	139312	12.41	9.46	5.56	5.69	0	0	0	0
chr7:100099460-100114771	FBXO24	chr7:100183955/+	-69184	12.41	9.46	5.56	5.69	3.103	7.201	4.3248	2.6176
chr7:100099460-100114771	PCOLCE	chr7:100199881/+	-85110	12.41	9.46	5.56	5.69	510.16	151.943	81.211	184.531
chr7:100099460-100114771	AGFG2	chr7:100136833/+	-22062	12.41	9.46	5.56	5.69	1616.29	2497.65	1083.61	726.398
chr7:100099460-100114771	ZCWPW1	chr7:100026430/-	-73030	12.41	9.46	5.56	5.69	20.3203	18.2768	12.0135	8.2892
chr7:100099460-100114771	SAP25	chr7:100170834/-	56063	12.41	9.46	5.56	5.69	0	0	0	0
chr22:20007864-20009287	DGCR8	chr22:20067754/+	-58467	1.52	0.46	0.5	0.42	661.783	514.883	714.56	1037.9
chr22:20007864-20009287	ARVCF	chr22:20004308/-	-3556	1.52	0.46	0.5	0.42	151.578	234.987	105.238	35.3383
chr22:20007864-20009287	C22orf29	chr22:19842370/-	-165494	1.52	0.46	0.5	0.42	553.113	956.527	1039.43	713.628
chr22:20007864-20009287	TXNRD2	chr22:19929514/-	-78350	1.52	0.46	0.5	0.42	661.233	379.635	321.48	726.398
chr22:20007864-20009287	LOC388849	chr22:20137430/-	128143	1.52	0.46	0.5	0.42	0	0	0	0
chr22:20007864-20009287	COMT	chr22:19950069/+	57795	1.52	0.46	0.5	0.42	1596.52	970.235	728.015	1101.16
chr22:20007864-20009287	GNB1L	chr22:19842461/-	-165403	1.52	0.46	0.5	0.42	52.6515	107.18	159.99	85.6277
chr22:20007864-20009287	TRMT2A	chr22:20104494/-	95207	1.52	0.46	0.5	0.42	419.037	249.608	417.588	592.461
chr22:20007864-20009287	TANGO2	chr22:20008591/+	0	1.52	0.46	0.5	0.42	0	0	0	0
chr22:20007864-20009287	ZDHHC8	chr22:20119363/+	-110076	1.52	0.46	0.5	0.42	880.912	808.355	1076.41	988.163
chr22:20007864-20009287	RANBP1	chr22:20103460/+	-94173	1.52	0.46	0.5	0.42	866.084	634.987	2138.88	3713.57
chr4:71704440-71706378	UTP3	chr4:71554195/+	150245	2.53	2.16	1.76	2.1	941.873	766.057	1227.29	1542.67
chr4:71704440-71706378	DCK	chr4:71859264/+	-152886	2.53	2.16	1.76	2.1	457.481	318.016	568.477	1068.44
chr4:71704440-71706378	GRSF1	chr4:71705219/-	0	2.53	2.16	1.76	2.1	3252.35	3310.7	3500.72	3765.05
chr4:71704440-71706378	RUFY3	chr4:71607343/+	97097	2.53	2.16	1.76	2.1	363.019	292.428	289.284	329.824
chr4:71704440-71706378	MOB1B	chr4:71768056/+	-61678	2.53	2.16	1.76	2.1	0	0	0	0
chr4:71704440-71706378	IGJ	chr4:71532347/-	-172093	2.53	2.16	1.76	2.1	5.492	0.5222	0	0.4363
chr19:50268529-50270866	IRF3	chr19:50169131/-	-99398	4.22	1.39	0.34	2.78	551.427	450.433	475.67	567.567
chr19:50268529-50270866	CPT1C	chr19:50195495/+	73034	4.22	1.39	0.34	2.78	20.3203	10.9661	3.8443	2.6176
chr19:50268529-50270866	PRMT1	chr19:50180408/+	88121	4.22	1.39	0.34	2.78	1738.76	1803.13	3038.92	3760.25
chr19:50268529-50270866	NUP62	chr19:50413140/-	142274	4.22	1.39	0.34	2.78	1158.56	901.99	1363.03	2624.05
chr19:50268529-50270866	TSKS	chr19:50266514/-	-2015	4.22	1.39	0.34	2.78	0	0	0	0
chr19:50268529-50270866	PRRG2	chr19:50086463/+	182066	4.22	1.39	0.34	2.78	4.3936	2.611	3.3638	3.9265
chr19:50268529-50270866	BCL2L12	chr19:50168398/+	100131	4.22	1.39	0.34	2.78	149.898	278.548	532.018	574.164
chr19:50268529-50270866	MED25	chr19:50321535/+	-50669	4.22	1.39	0.34	2.78	810.412	868.872	690.942	659.53
chr19:50268529-50270866	SIGLEC11	chr19:50464428/-	193562	4.22	1.39	0.34	2.78	0	0	0	0
chr19:50268529-50270866	PNKP	chr19:50370473/-	99607	4.22	1.39	0.34	2.78	314.69	388.512	410.86	309.755
chr19:50268529-50270866	FUZ	chr19:50316566/-	45700	4.22	1.39	0.34	2.78	41.1184	31.9217	21.3743	12.4033
chr19:50268529-50270866	NOSIP	chr19:50083828/-	-184701	4.22	1.39	0.34	2.78	843.018	1072.06	1053.34	862.952
chr19:50268529-50270866	RRAS	chr19:50143399/-	-125130	4.22	1.39	0.34	2.78	1012.17	947.781	540.606	277.907
chr19:50268529-50270866	AKT1S1	chr19:50376558/-	105692	4.22	1.39	0.34	2.78	2013.36	1893.99	1758.77	2144.73
chr19:50268529-50270866	AP2A1	chr19:50270179/+	0	4.22	1.39	0.34	2.78	4618.82	5060.51	2732.11	2359.19
chr19:50268529-50270866	SCAF1	chr19:50148277/+	120252	4.22	1.39	0.34	2.78	2191.85	2218.28	2337.82	2633.79
chr19:50268529-50270866	PTOV1	chr19:50353991/+	-83125	4.22	1.39	0.34	2.78	1485.55	1346.63	938.265	951.407
chr19:50268529-50270866	ATF5	chr19:50431958/+	-161092	4.22	1.39	0.34	2.78	648.602	744.125	1065.35	1061.02
chr19:50268529-50270866	ADM5	chr19:50191941/+	76588	4.22	1.39	0.34	2.78	0	0	0	0
chr19:50268529-50270866	IL4I1	chr19:50399438/-	128572	4.22	1.39	0.34	2.78	9.913	5.9112	4.8823	5.9639
chr19:50268529-50270866	TBC1D17	chr19:50380681/+	-109815	4.22	1.39	0.34	2.78	616.402	708.548	292.153	189.575
chr14:89017262-89030381	PTPN21	chr14:89021122/-	0	3.23	4.07	3.33	4.39	852.903	733.159	547.333	509.133
chr14:89017262-89030381	SPATA7	chr14:88851987/+	165275	3.23	4.07	3.33	4.39	118.077	177.024	84.0942	51.0442
chr14:89017262-89030381	ZC3H14	chr14:89029252/+	0	3.23	4.07	3.33	4.39	1188.46	1425.07	1683.81	1608.98
chr12:46939802-46958913	SLC38A2	chr12:46766644/-	-173158	61.52	21.15	19.62	68.36	31526.7	40338.9	23507.4	16339.8
chr10:5257928-5259794	TUBAL3	chr10:5446792/-	186998	1.57	3.83	0.6	0.39	2.1968	1.5666	3.8443	2.1814
chr10:5257928-5259794	AKR1C2	chr10:5060224/-	-197704	1.57	3.83	0.6	0.39	2735.3	3425.28	791.072	757.923
chr10:5257928-5259794	AKR1C4	chr10:5238797/+	19131	1.57	3.83	0.6	0.39	2.2407	2.6475	0.9707	0.8856
chr10:5257928-5259794	UCN3	chr10:5406975/+	-147181	1.57	3.83	0.6	0.39	0	0	0	0
chr10:5257928-5259794	NET1	chr10:5454513/+	-194719	1.57	3.83	0.6	0.39	1037.98	1485.64	1554.06	1684.46
chr10:5257928-5259794	AKR1C3	chr10:5136567/+	121361	1.57	3.83	0.6	0.39	2042.39	3093.95	1032.72	467.233
chr11:19668063-19706093	NAV2	chr11:19734880/+	-28787	7.59	7.64	6.44	6.43	2909.16	3597.19	2857.68	1986.68
chr16:81299462-81300272	CMIP	chr16:81478774/+	-178502	0.44	0.86	0.04	-0.04	2079.81	2020.37	1489.67	1577.57
chr16:81299462-81300272	PKD1L2	chr16:81214966/-	-84496	0.44	0.86	0.04	-0.04	4.3936	2.611	0	1.3088
chr16:81299462-81300272	GAN	chr16:81348570/+	-48298	0.44	0.86	0.04	-0.04	250.983	350.392	470.447	337.677
chr16:81299462-81300272	BCO1	chr16:81272295/+	27167	0.44	0.86	0.04	-0.04	0	0	0	0
chr16:81299462-81300272	C16orf46	chr16:81110871/-	-188591	0.44	0.86	0.04	-0.04	46.1326	58.4856	62.9505	41.8824
chr16:81299462-81300272	GCSH	chr16:81129979/-	-169483	0.44	0.86	0.04	-0.04	690.341	687.729	1012.01	1326.71
chr13:31317004-31319149	TEX26	chr13:31506833/+	-187684	3.24	2.92	2.38	2.33	0	0	0	0
chr13:31317004-31319149	ALOX5AP	chr13:31309644/+	7360	3.24	2.92	2.38	2.33	2.746	0	0	0
chr13:31317004-31319149	USPL1	chr13:31195209/+	121795	3.24	2.92	2.38	2.33	270.754	311.227	336.377	370.397
chr13:31317004-31319149	MEDAG	chr13:31480311/+	-161162	3.24	2.92	2.38	2.33	0	0	0	0
chr15:85174084-85175654	SEC11A	chr15:85234874/-	59220	1.01	0.93	0.26	1.24	2191.85	1643.34	1430.08	1892.56
chr15:85174084-85175654	ALPK3	chr15:85359910/+	-184256	1.01	0.93	0.26	1.24	248.237	77.8068	8.6497	7.4167
chr15:85174084-85175654	ZNF592	chr15:85291817/+	-116163	1.01	0.93	0.26	1.24	902.88	1238.64	1105.72	1107.7
chr15:85174084-85175654	NMB	chr15:85201801/-	26147	1.01	0.93	0.26	1.24	10.9839	4.6997	7.2081	7.4167
chr15:85174084-85175654	WDR73	chr15:85197573/-	21919	1.01	0.93	0.26	1.24	337.251	346.538	379.837	368.805
chr15:85174084-85175654	ZSCAN2	chr15:85147050/+	27034	1.01	0.93	0.26	1.24	130.16	189.556	89.3801	69.804
chr17:47020734-47051165	TTLL6	chr17:46894468/-	-126266	18.61	6.04	1.79	5.44	0	0	0	0
chr17:47020734-47051165	B4GALNT2	chr17:47209821/+	-158656	18.61	6.04	1.79	5.44	83.478	3.6554	0.4805	3.4902
chr17:47020734-47051165	GIP	chr17:47045954/-	0	18.61	6.04	1.79	5.44	4.9428	2.611	0.4805	0.4363
chr17:47020734-47051165	CALCOCO2	chr17:46925425/+	95309	18.61	6.04	1.79	5.44	2169.33	1687.21	987.506	792.275
chr17:47020734-47051165	UBE2Z	chr17:46985730/+	35004	18.61	6.04	1.79	5.44	3009.05	3333.16	2932.72	2279.1
chr17:47020734-47051165	SNF8	chr17:47022153/-	0	18.61	6.04	1.79	5.44	1608.6	1340.47	1055.74	992.962
chr17:47020734-47051165	IGF2BP1	chr17:47074773/+	-23608	18.61	6.04	1.79	5.44	10.9839	5.2219	1.9222	0
chr17:47020734-47051165	ATP5G1	chr17:46970770/+	49964	18.61	6.04	1.79	5.44	963.841	563.447	685.247	1281.78
chr12:88601630-88602662	TMTC3	chr12:88542064/+	59566	0.84	0.53	0.3	0.17	1912.3	2468.41	2471.41	2026.06
chr12:88601630-88602662	C12orf50	chr12:88423175/-	-178455	0.84	0.53	0.3	0.17	1.6476	0	0	0.8725
chr12:88601630-88602662	C12orf29	chr12:88429267/+	172363	0.84	0.53	0.3	0.17	397.426	554.439	828.011	817.562
chr12:88601630-88602662	CEP290	chr12:88535992/-	-65638	0.84	0.53	0.3	0.17	549.181	641.791	913.479	1001.53
chr6:82853502-82855430	IBTK	chr6:82950559/-	95129	2.02	0.73	0.78	0.82	2512.03	1917.49	1918.79	2230.24
chr4:100566505-100577179	DAPP1	chr4:100737980/+	-160801	2.11	1.42	0.22	0.58	0	0	0	0.4363
chr4:100566505-100577179	C4orf17	chr4:100434145/+	132360	2.11	1.42	0.22	0.58	0	0	0	0
chr4:100566505-100577179	TRMT10A	chr4:100485213/-	-81292	2.11	1.42	0.22	0.58	0	0	0	0
chr4:100566505-100577179	MTTP	chr4:100495965/+	70540	2.11	1.42	0.22	0.58	6.0412	1.0444	1.4416	0.8725
chr19:19079814-19081115	DDX49	chr19:19030483/+	49331	0.59	0.91	0.88	1.12	697.48	650.653	763.575	857.717
chr19:19079814-19081115	SLC25A42	chr19:19174802/+	-93687	0.59	0.91	0.88	1.12	126.865	125.326	49.4954	30.5392
chr19:19079814-19081115	MEF2BNB-MEF2B	chr19:19261572/-	180457	0.59	0.91	0.88	1.12	0	0	0	0
chr19:19079814-19081115	COPE	chr19:19030198/-	-49616	0.59	0.91	0.88	1.12	1942.13	2131.78	1479.1	1245.38
chr19:19079814-19081115	COMP	chr19:18902113/-	-177701	0.59	0.91	0.88	1.12	0.5492	0	0	0
chr19:19079814-19081115	GDF1	chr19:19006952/-	-72862	0.59	0.91	0.88	1.12	25.5047	15.5927	17.8184	19.4666
chr19:19079814-19081115	CERS1	chr19:19007535/-	-72279	0.59	0.91	0.88	1.12	0	0	0	0
chr19:19079814-19081115	TMEM161A	chr19:19249309/-	168194	0.59	0.91	0.88	1.12	445.948	370.757	401.249	464.633
chr19:19079814-19081115	MEF2B	chr19:19261572/-	180457	0.59	0.91	0.88	1.12	30.0246	16.9034	27.0399	13.5856
chr19:19079814-19081115	UPF1	chr19:18942743/+	137071	0.59	0.91	0.88	1.12	1970.52	2202.61	2298.89	2796.52
chr19:19079814-19081115	ARMC6	chr19:19144386/+	-63271	0.59	0.91	0.88	1.12	481.305	412.689	669.923	949.954
chr19:19079814-19081115	HOMER3	chr19:19052040/-	-27774	0.59	0.91	0.88	1.12	742.899	366.914	343.585	632.35
chr19:19079814-19081115	SUGP2	chr19:19141890/-	60775	0.59	0.91	0.88	1.12	0	0	0	0
chr3:142165512-142167577	PLS1	chr3:142315228/+	-147651	1.89	0.86	1.06	1.31	732.629	1215.14	1139.36	886.947
chr3:142165512-142167577	ATR	chr3:142297667/-	130090	1.89	0.86	1.06	1.31	1404.85	1239.69	2004.32	1873.36
chr3:142165512-142167577	XRN1	chr3:142166903/-	0	1.89	0.86	1.06	1.31	1520.73	1544.13	1084.57	893.491
chr2:121346770-121393824	GLI2	chr2:121554866/+	-161042	23.26	6.94	1.23	0.96	82.9288	40.7311	24.5074	42.7549
chr12:59845654-59854652	SLC16A7	chr12:59989820/+	-135168	3.47	2.32	0.29	0.1	1256.56	576.501	356.079	759.555
chr1:183600657-183605967	RGL1	chr1:183605181/+	0	8.93	4.42	1.65	2.44	652.446	695.039	748.678	488.628
chr1:183600657-183605967	NCF2	chr1:183560055/-	-40602	8.93	4.42	1.65	2.44	4.3936	2.0888	0	2.6176
chr1:183600657-183605967	SMG7	chr1:183485008/+	115649	8.93	4.42	1.65	2.44	2222.6	2076.24	2339.26	2718.87
chr1:183600657-183605967	ARPC5	chr1:183605075/-	0	8.93	4.42	1.65	2.44	5794.58	4803.66	3564.63	3027.31
chr1:183600657-183605967	APOBEC4	chr1:183617945/-	11978	8.93	4.42	1.65	2.44	0	0.5222	0	0.4363
chr22:42977491-42978336	ATP5L2	chr22:43036606/-	58270	0.42	0.19	0.28	0.76	4.3936	6.2663	8.6497	3.9265
chr22:42977491-42978336	CYB5R3	chr22:43032851/-	54515	0.42	0.19	0.28	0.76	8022.67	9412.01	5213.84	4124.98
chr22:42977491-42978336	POLDIP3	chr22:43010967/-	32631	0.42	0.19	0.28	0.76	1576.2	1847.52	1793.85	1619.89
chr22:42977491-42978336	SERHL2	chr22:42949867/+	27624	0.42	0.19	0.28	0.76	9.7482	7.6971	22.8592	31.4598
chr22:42977491-42978336	RRP7A	chr22:42915828/-	-61663	0.42	0.19	0.28	0.76	355.572	379.958	700.697	958.431
chr22:42977491-42978336	NFAM1	chr22:42828400/-	-149091	0.42	0.19	0.28	0.76	0	0	0	0
chr22:42977491-42978336	A4GALT	chr22:43090002/-	111666	0.42	0.19	0.28	0.76	555.238	632.898	254.685	141.353
chr1:197432897-197433764	CRB1	chr1:197297551/+	135346	0.52	1.06	0.45	0.32	3.8444	17.7546	4.8054	0.4363
chr12:51375077-51381518	LETMD1	chr12:51442081/+	-60563	2.09	1.91	0.56	0.19	492.081	395.822	212.398	388.285
chr12:51375077-51381518	SLC11A2	chr12:51403052/-	21534	2.09	1.91	0.56	0.19	914.413	667.363	641.038	834.594
chr12:51375077-51381518	CSRNP2	chr12:51470429/-	88911	2.09	1.91	0.56	0.19	697.48	908.094	547.814	320.662
chr12:51375077-51381518	TMPRSS12	chr12:51236700/+	138377	2.09	1.91	0.56	0.19	0	0	0.4805	0.4363
chr12:51375077-51381518	TFCP2	chr12:51566925/-	185407	2.09	1.91	0.56	0.19	649.7	510.183	601.634	713.746
chr12:51375077-51381518	METTL7A	chr12:51318533/+	56544	2.09	1.91	0.56	0.19	4355.68	4233.94	550.216	656.594
chr17:44079766-44080562	KANSL1	chr17:44249597/-	169035	0.54	0.23	0.03	0.17	0	0	0	0
chr17:44079766-44080562	STH	chr17:44076615/+	3151	0.54	0.23	0.03	0.17	0	0.5222	0	0.4363
chr17:44079766-44080562	MAPT	chr17:44039686/+	40080	0.54	0.23	0.03	0.17	119.176	121.149	80.7304	43.6275
chr17:44079766-44080562	SPPL2C	chr17:43922255/+	157511	0.54	0.23	0.03	0.17	0	0	0	0
chr17:44079766-44080562	MGC57346-CRHR1	chr17:43907459/+	172307	0.54	0.23	0.03	0.17	0	0	0	0
chr17:44079766-44080562	CRHR1	chr17:43907459/+	172307	0.54	0.23	0.03	0.17	0	0	0	0
chr7:97600865-97604858	ASNS	chr7:97501853/-	-99012	3.27	1.84	0.96	1.75	1094	1444.39	1363.29	833.285
chr7:97600865-97604858	LMTK2	chr7:97736196/+	-131338	3.27	1.84	0.96	1.75	526.131	802.089	795.291	636.525
chr5:76381847-76384313	AGGF1	chr5:76326209/+	55638	6.3	4.33	1.12	1.95	1214.27	1275.72	1041.81	897.854
chr5:76381847-76384313	ZBED3	chr5:76383029/-	0	6.3	4.33	1.12	1.95	334.785	157.154	50.937	99.8633
chr5:76381847-76384313	PDE8B	chr5:76506705/+	-122392	6.3	4.33	1.12	1.95	84.5763	20.3655	12.0135	19.1961
chr5:76381847-76384313	CRHBP	chr5:76248679/+	133168	6.3	4.33	1.12	1.95	0	0	0	0
chr1:103740754-103750703	COL11A1	chr1:103574051/-	-166703	6.95	1	-0.28	0.1	2.746	0	0	0
chr5:67255646-67385431	PIK3R1	chr5:67511583/+	-126152	159.57	66.02	15.92	23.07	14150.1	9544.13	4626.14	5055.99
chr22:25289816-25291553	TMEM211	chr22:25334253/-	42700	1.1	1.7	1.86	1.1	0	0	0	0
chr22:25289816-25291553	KIAA1671	chr22:25423940/+	-132387	1.1	1.7	1.86	1.1	2278.07	2434.46	3324.36	2468.88
chr22:25289816-25291553	PIWIL3	chr22:25170686/-	-119130	1.1	1.7	1.86	1.1	0	0	0	0.4363
chr22:25289816-25291553	SGSM1	chr22:25202187/+	87629	1.1	1.7	1.86	1.1	3.8444	1.0444	1.4416	3.4902
chr11:12180538-12223207	MICAL2	chr11:12183625/+	0	11.17	11.94	10.99	27.23	7687.11	5284.07	5098.99	6428.08
chr11:12180538-12223207	PARVA	chr11:12399025/+	-175818	11.17	11.94	10.99	27.23	963.292	948.303	484.382	431.476
chr11:12180538-12223207	MICALCL	chr11:12308446/+	-85239	11.17	11.94	10.99	27.23	29.1074	23.4987	14.8967	18.7598
chr11:12180538-12223207	DKK3	chr11:12030916/-	-149622	11.17	11.94	10.99	27.23	4931.79	4546.74	1687.17	1311.88
chr5:153195930-153208457	GRIA1	chr5:153026487/+	169443	8.93	1.04	1.45	4.82	1.0984	0	0	0
chr3:148692289-148693654	CPA3	chr3:148583042/+	109247	0.89	0.1	0.29	0.45	6.0412	0	0	1.7451
chr3:148692289-148693654	HLTF	chr3:148804340/-	110686	0.89	0.1	0.29	0.45	350.388	316.971	207.112	242.133
chr3:148692289-148693654	GYG1	chr3:148709194/+	-15540	0.89	0.1	0.29	0.45	1215.92	1119.58	1074.96	958.932
chr3:148692289-148693654	HPS3	chr3:148847370/+	-153716	0.89	0.1	0.29	0.45	1517.24	1404.55	1292.65	1110.9
chr3:148692289-148693654	CPB1	chr3:148545587/+	146702	0.89	0.1	0.29	0.45	0.5492	0	0	0
chr4:140735187-140737908	MGST2	chr4:140616350/+	118837	2.54	2.1	0.76	0.67	306.452	137.859	46.6122	94.6717
chr15:58751319-58766464	LIPC	chr15:58724174/+	27145	1.82	3.65	2.97	1.44	0	0	0	0
chr12:39835455-39838506	C12orf40	chr12:40019971/+	-181465	8.11	7.22	4.91	3.73	0	0	0	0
chr12:39835455-39838506	ABCD2	chr12:40013842/-	175336	8.11	7.22	4.91	3.73	188.924	91.3838	56.223	24.8677
chr12:39835455-39838506	KIF21A	chr12:39837191/-	0	8.11	7.22	4.91	3.73	2221.5	2392.17	2367.61	2353.27
chr3:154847235-154848526	MME	chr3:154801946/+	45289	1.19	0.05	-0.14	-0.27	5269	3052.22	534.359	441.947
chr10:13141315-13143007	CCDC3	chr10:13141772/-	0	2.23	1.07	0.87	0.7	2.1968	1.5666	0	0.4363
chr10:13141315-13143007	MCM10	chr10:13203553/+	-60546	2.23	1.07	0.87	0.7	131.258	34.9869	642.96	1614.65
chr10:13141315-13143007	OPTN	chr10:13142081/+	0	2.23	1.07	0.87	0.7	1653.63	1248.56	582.412	349.892
chr10:13141315-13143007	UCMA	chr10:13276327/-	133320	2.23	1.07	0.87	0.7	0	0	0	0
chr10:13141315-13143007	PHYH	chr10:13336595/-	193588	2.23	1.07	0.87	0.7	797.983	1086.68	530.034	290.995
chr1:90330299-90332676	LRRC8D	chr1:90309196/+	21103	2.82	4.44	1.86	1.15	1922.74	1925.33	1119.17	1531.33
chr1:90330299-90332676	ZNF326	chr1:90460677/+	-128001	2.82	4.44	1.86	1.15	653.544	586.423	663.143	994.707
chr1:90330299-90332676	LRRC8C	chr1:90152028/+	178271	2.82	4.44	1.86	1.15	15.9267	24.5431	18.741	13.0882
chr8:95565041-95567198	ESRP1	chr8:95653363/+	-86165	3.11	2.88	2.21	2.15	8.7872	3.1332	0	3.9265
chr8:95565041-95567198	DPY19L4	chr8:95732102/+	-164904	3.11	2.88	2.21	2.15	1438.35	1137.86	1073.52	1345.04
chr8:95565041-95567198	KIAA1429	chr8:95565745/-	0	3.11	2.88	2.21	2.15	1940.31	2002.09	2136.47	2223.69
chr8:95565041-95567198	RAD54B	chr8:95487342/-	-77699	3.11	2.88	2.21	2.15	88.937	93.4099	371.456	449.363
chr8:95565041-95567198	FSBP	chr8:95449179/-	-115862	3.11	2.88	2.21	2.15	0	0	0	0
chr13:97900500-97913496	MBNL2	chr13:97927885/+	-14389	13.89	10.94	5.85	15.85	4145.89	5023.5	2024.99	1976.33
chr13:97900500-97913496	RAP2A	chr13:98086474/+	-172978	13.89	10.94	5.85	15.85	1138.49	1679.9	1343.1	901.78
chr12:81155186-81158609	LIN7A	chr12:81331693/-	173084	5.42	1.45	0.69	1.54	33.501	13.0548	5.2859	15.2696
chr12:81155186-81158609	MYF5	chr12:81110707/+	44479	5.42	1.45	0.69	1.54	0	0	0	0
chr12:81155186-81158609	MYF6	chr12:81101407/+	53779	5.42	1.45	0.69	1.54	0	0	0	0
chr10:53427127-53479619	CSTF2T	chr10:53459354/-	0	77.59	11.51	-0.67	11.08	2001.27	1086.68	812.11	1150.89
chr5:90573226-90610700	ARRDC3	chr5:90679148/-	68448	13.32	11.5	13.73	18.99	1783.24	3392.17	2233.54	1169.22
chr14:91615470-91631661	C14orf159	chr14:91623982/+	0	4.29	0.05	-0.39	-0.42	539.312	283.029	145.603	210.285
chr14:91615470-91631661	RPS6KA5	chr14:91526992/-	-88478	4.29	0.05	-0.39	-0.42	11.5331	26.6319	24.5074	35.7745
chr14:91615470-91631661	GPR68	chr14:91701522/-	69861	4.29	0.05	-0.39	-0.42	5.492	1.5666	0.4805	0.8725
chr12:109011505-109038858	ISCU	chr12:108957835/+	53670	13.89	8.12	4.09	7.21	737.023	643.342	691.975	910.942
chr12:109011505-109038858	TMEM119	chr12:108991893/-	-19612	13.89	8.12	4.09	7.21	6.0412	0.5222	0	0
chr12:109011505-109038858	SELPLG	chr12:109025853/-	0	13.89	8.12	4.09	7.21	42.2882	8.3551	12.0135	7.4167
chr12:109011505-109038858	CORO1C	chr12:109095098/-	56240	13.89	8.12	4.09	7.21	5669.91	4657.44	6128.78	5672.01
chr12:109011505-109038858	FICD	chr12:108910691/+	100814	13.89	8.12	4.09	7.21	54.9197	52.7415	42.2874	38.3922
chr12:109011505-109038858	SSH1	chr12:109221326/-	182468	13.89	8.12	4.09	7.21	2778.39	2060.57	2003.36	2012.1
chr12:109011505-109038858	SART3	chr12:108955164/-	-56341	13.89	8.12	4.09	7.21	957.25	936.292	1314.27	1856.35
chr1:145427048-145478956	RNF115	chr1:145610989/+	-132033	35.24	57.77	25.31	20.95	1335.65	1504.44	715.041	839.393
chr1:145427048-145478956	RBM8A	chr1:145507556/+	-28600	35.24	57.77	25.31	20.95	1516.55	1423.74	2017.34	2632.74
chr1:145427048-145478956	NOTCH2NL	chr1:145248812/+	178236	35.24	57.77	25.31	20.95	295.787	189.948	160.058	243.241
chr1:145427048-145478956	PIAS3	chr1:145575987/+	-97031	35.24	57.77	25.31	20.95	1550.93	1592.69	1171.55	897.854
chr1:145427048-145478956	HFE2	chr1:145416312/+	10736	35.24	57.77	25.31	20.95	1.6476	0	0	0.4363
chr1:145427048-145478956	ANKRD34A	chr1:145470507/+	0	35.24	57.77	25.31	20.95	207.047	63.1854	49.0149	144.843
chr1:145427048-145478956	LIX1L	chr1:145477066/+	0	35.24	57.77	25.31	20.95	2082.56	1904.96	1484.86	1260.83
chr1:145427048-145478956	POLR3GL	chr1:145460262/-	0	35.24	57.77	25.31	20.95	490.433	428.198	271.985	233.843
chr1:145427048-145478956	ANKRD35	chr1:145549208/+	-70252	35.24	57.77	25.31	20.95	4.9428	2.611	0	1.3088
chr1:145427048-145478956	ITGA10	chr1:145524890/+	-45934	35.24	57.77	25.31	20.95	1937.02	229.765	130.226	891.31
chr1:145427048-145478956	PEX11B	chr1:145516164/+	-37208	35.24	57.77	25.31	20.95	566.222	445.431	378.184	342.476
chr1:145427048-145478956	NUDT17	chr1:145589434/-	110478	35.24	57.77	25.31	20.95	24.7139	15.6658	15.3772	17.0147
chr1:145427048-145478956	NBPF10	chr1:145293370/+	133678	35.24	57.77	25.31	20.95	254.827	215.948	232.427	306.614
chr1:145427048-145478956	TXNIP	chr1:145438437/+	0	35.24	57.77	25.31	20.95	2275.32	12370.8	2403.17	643.506
chr1:145427048-145478956	POLR3C	chr1:145609355/-	130399	35.24	57.77	25.31	20.95	650.249	561.88	499.76	769.153
chr7:25137957-25138451	OSBPL3	chr7:25019830/-	-118127	0.29	0.22	0.43	0.12	1097.3	975.979	1202.31	1537
chr7:25137957-25138451	NPVF	chr7:25268104/-	129653	0.29	0.22	0.43	0.12	0	0	0	0
chr7:25137957-25138451	CYCS	chr7:25163745/-	25294	0.29	0.22	0.43	0.12	3677.42	3368.67	5508.89	6067.28
chr7:25137957-25138451	C7orf31	chr7:25218950/-	80499	0.29	0.22	0.43	0.12	108.741	31.8538	12.494	34.902
chr7:87920829-87921780	SRI	chr7:87856307/-	-64522	0.25	0.73	0.55	0.74	1016.56	784.334	744.834	918.795
chr7:87920829-87921780	STEAP4	chr7:87920328/-	-501	0.25	0.73	0.55	0.74	18.1235	7.3107	0.9611	3.0539
chr6:143544894-143554714	AIG1	chr6:143382083/+	162811	-0.03	2.72	2.85	3.05	749.654	924.804	484.863	393.52
chr1:173420565-173421834	SLC9C2	chr1:173570993/-	149159	0.62	1.76	0.05	-0.21	0	0	0	0
chr1:173420565-173421834	PRDX6	chr1:173446485/+	-24651	0.62	1.76	0.05	-0.21	5058.65	4816.19	4189.81	4583.94
chr20:45886549-45888334	ZMYND8	chr20:45914569/-	26235	0.22	0.49	1.99	1.72	2065.53	935.248	761.653	2563.55
chr19:19701638-19707665	TSSK6	chr19:19626468/-	-75170	3.48	2.16	0.82	1.05	23.6155	15.1436	6.247	11.3431
chr19:19701638-19707665	YJEFN3	chr19:19639669/+	61969	3.48	2.16	0.82	1.05	67.0899	28.1358	22.2105	45.6474
chr19:19701638-19707665	ATP13A1	chr19:19774502/-	66837	3.48	2.16	0.82	1.05	1940.86	2210.44	1731.38	1553.14
chr19:19701638-19707665	CILP2	chr19:19649073/+	52565	3.48	2.16	0.82	1.05	21.9679	23.4987	9.1302	1.3088
chr19:19701638-19707665	ZNF14	chr19:19843920/-	136255	3.48	2.16	0.82	1.05	62.0593	75.718	69.678	42.3187
chr19:19701638-19707665	NDUFA13	chr19:19627018/+	74620	3.48	2.16	0.82	1.05	1220.78	968.731	696.194	788.074
chr19:19701638-19707665	LPAR2	chr19:19739038/-	31373	3.48	2.16	0.82	1.05	127.963	76.2402	21.6242	20.9412
chr19:19701638-19707665	GMIP	chr19:19754475/-	46810	3.48	2.16	0.82	1.05	543.156	522.715	226.814	143.098
chr19:19701638-19707665	GATAD2A	chr19:19576148/+	125490	3.48	2.16	0.82	1.05	2312.67	2417.23	3732.82	4372.78
chr19:19701638-19707665	ZNF101	chr19:19778961/+	-71296	3.48	2.16	0.82	1.05	90.6175	76.7624	116.29	110.814
chr19:19701638-19707665	PBX4	chr19:19729724/-	22059	3.48	2.16	0.82	1.05	20.3203	13.577	14.8967	10.0343
chr12:123336108-123337225	CCDC62	chr12:123259055/+	77053	0.88	0.22	0.79	0.3	11.5331	12.5326	7.6886	15.2696
chr12:123336108-123337225	DENR	chr12:123238239/+	97869	0.88	0.22	0.79	0.3	2238.53	2228.72	2964.44	2902.1
chr12:123336108-123337225	ARL6IP4	chr12:123464606/+	-127381	0.88	0.22	0.79	0.3	1772.26	1824.54	1689.09	1646.5
chr12:123336108-123337225	VPS37B	chr12:123380711/-	43486	0.88	0.22	0.79	0.3	798.533	906.527	842.864	965.04
chr12:123336108-123337225	OGFOD2	chr12:123459249/+	-122024	0.88	0.22	0.79	0.3	233.151	159.541	174.57	217.924
chr12:123336108-123337225	HCAR3	chr12:123201438/-	-134670	0.88	0.22	0.79	0.3	0	0	0	0
chr12:123336108-123337225	HCAR2	chr12:123187903/-	-148205	0.88	0.22	0.79	0.3	0	0	0	0
chr12:123336108-123337225	HCAR1	chr12:123215128/-	-120980	0.88	0.22	0.79	0.3	0	0	0	0
chr12:123336108-123337225	PITPNM2	chr12:123519231/-	182006	0.88	0.22	0.79	0.3	1179.13	940.47	425.757	527.893
chr12:123336108-123337225	ABCB9	chr12:123444868/-	107643	0.88	0.22	0.79	0.3	152.935	203.906	174.301	112.336
chr12:123336108-123337225	HIP1R	chr12:123319984/+	16124	0.88	0.22	0.79	0.3	1466.91	2026.11	1666.51	1058.84
chr11:392754-407538	B4GALNT4	chr11:369794/+	22960	9.58	3.4	4.17	9.22	212.539	133.681	91.3023	138.735
chr11:392754-407538	ODF3	chr11:197296/+	195458	9.58	3.4	4.17	9.22	1.0984	0.5222	0	0
chr11:392754-407538	PTDSS2	chr11:450279/+	-42741	9.58	3.4	4.17	9.22	541.508	635.509	652.571	530.51
chr11:392754-407538	ANO9	chr11:442010/-	34472	9.58	3.4	4.17	9.22	2.1968	2.611	0	0.4363
chr11:392754-407538	HRAS	chr11:534374/-	126836	9.58	3.4	4.17	9.22	972.079	1026.63	1410.86	1592.84
chr11:392754-407538	RIC8A	chr11:207510/+	185244	9.58	3.4	4.17	9.22	2229.06	2120.85	2284.19	2346.5
chr11:392754-407538	RASSF7	chr11:560970/+	-153432	9.58	3.4	4.17	9.22	614.002	396.345	250.841	300.157
chr11:392754-407538	PKP3	chr11:394182/+	0	9.58	3.4	4.17	9.22	1364.21	716.971	519.462	980.31
chr11:392754-407538	RNH1	chr11:502180/-	94642	9.58	3.4	4.17	9.22	3717.51	3703.92	3333.49	3170.85
chr11:392754-407538	BET1L	chr11:207421/-	-185333	9.58	3.4	4.17	9.22	1268.65	1077.81	1034.6	1094.61
chr11:392754-407538	SIRT3	chr11:236361/-	-156393	9.58	3.4	4.17	9.22	452.67	395.603	240.077	326.552
chr11:392754-407538	IFITM3	chr11:320913/-	-71841	9.58	3.4	4.17	9.22	6486.19	4468.37	2274.93	3284.09
chr11:392754-407538	IFITM2	chr11:308106/+	84648	9.58	3.4	4.17	9.22	1656.95	657.149	302.643	570.827
chr11:392754-407538	IFITM1	chr11:313990/+	78764	9.58	3.4	4.17	9.22	606.67	393.018	172.547	310.637
chr11:392754-407538	IFITM5	chr11:299525/-	-93229	9.58	3.4	4.17	9.22	0	0	0	0
chr11:392754-407538	PHRF1	chr11:576445/+	-168907	9.58	3.4	4.17	9.22	1998.53	2314.88	2716	3152.52
chr11:392754-407538	SCGB1C1	chr11:193079/+	199675	9.58	3.4	4.17	9.22	0	0	0	0
chr11:392754-407538	SCGB1C2	chr11:193079/+	199675	9.58	3.4	4.17	9.22	0	0	0	0
chr11:392754-407538	LRRC56	chr11:537521/+	-129983	9.58	3.4	4.17	9.22	28.0091	33.9426	11.0524	1.3088
chr11:392754-407538	LMNTD2	chr11:560778/-	153240	9.58	3.4	4.17	9.22	0	0	0	0
chr11:392754-407538	PSMD13	chr11:236807/+	155947	9.58	3.4	4.17	9.22	2516.97	2363.45	3231.14	2975.83
chr11:392754-407538	ATHL1	chr11:289803/+	102951	9.58	3.4	4.17	9.22	337.207	113.316	71.6002	129.137
chr11:392754-407538	SIGIRR	chr11:410026/-	2488	9.58	3.4	4.17	9.22	157.07	226.632	234.983	88.5638
chr1:20124820-20127369	PLA2G2A	chr1:20305371/-	178002	4.71	2.7	1.62	3.44	1.0984	0	0	0
chr1:20124820-20127369	NBL1	chr1:19981504/+	143316	4.71	2.7	1.62	3.44	309.731	300.783	338.395	330.16
chr1:20124820-20127369	RNF186	chr1:20141770/-	14401	4.71	2.7	1.62	3.44	0	0	0	0
chr1:20124820-20127369	OTUD3	chr1:20208887/+	-81518	4.71	2.7	1.62	3.44	297.665	368.668	365.69	452.853
chr1:20124820-20127369	TMCO4	chr1:20126409/-	0	4.71	2.7	1.62	3.44	392.127	145.692	89.8606	250.422
chr1:20124820-20127369	HTR6	chr1:19991779/+	133041	4.71	2.7	1.62	3.44	0	0	0.4805	0
chr1:20124820-20127369	PLA2G2E	chr1:20250109/-	122740	4.71	2.7	1.62	3.44	0	0	0	0
chr1:20124820-20127369	MINOS1-NBL1	chr1:19981504/+	143316	4.71	2.7	1.62	3.44	0	0	0	0
chr4:106938174-106938926	NPNT	chr4:106816596/+	121578	0.11	0.71	0.29	0.05	9.8855	1.0444	0	0.4363
chr22:36747714-36749425	MYH9	chr22:36745299/-	-2415	1.12	0.69	0.15	0.81	56633.8	67391.1	46201.8	34621
chr22:36747714-36749425	EIF3D	chr22:36922177/-	172752	1.12	0.69	0.15	0.81	2898.11	2779.11	3377.22	4145.05
chr22:36747714-36749425	TXN2	chr22:36877686/-	128261	1.12	0.69	0.15	0.81	1259.86	1177.02	1003.36	1017.83
chr22:36747714-36749425	FOXRED2	chr22:36902469/-	153044	1.12	0.69	0.15	0.81	430.57	1028.72	1402.21	945.844
chr22:36747714-36749425	APOL4	chr22:36600878/-	-146836	1.12	0.69	0.15	0.81	20.8695	3.6554	0	0.4363
chr22:36747714-36749425	APOL3	chr22:36562224/-	-185490	1.12	0.69	0.15	0.81	166.956	67.3629	3.3638	16.1422
chr22:36747714-36749425	APOL2	chr22:36635999/-	-111715	1.12	0.69	0.15	0.81	1965.94	931.368	551.98	535.283
chr22:36747714-36749425	APOL1	chr22:36650982/+	96732	1.12	0.69	0.15	0.81	413.732	95.7859	23.7049	65.4674
chr4:69676373-69677264	UGT2B10	chr4:69681710/+	-4446	0.85	0.41	0	0.18	0	0	0	0
chr4:69676373-69677264	UGT2A3	chr4:69817508/-	140244	0.85	0.41	0	0.18	0	0	0	0
chr4:69676373-69677264	UGT2B15	chr4:69536493/-	-139880	0.85	0.41	0	0.18	0.5492	0	0	0
chr1:169496482-169509101	SELL	chr1:169680842/-	171741	1.44	4.56	1.56	-0.27	0	0	0	0
chr1:169496482-169509101	SLC19A2	chr1:169455207/-	-41275	1.44	4.56	1.56	-0.27	334.461	304.961	365.209	470.304
chr1:169496482-169509101	NME7	chr1:169337200/-	-159282	1.44	4.56	1.56	-0.27	439.341	424.052	381.85	404.475
chr1:169496482-169509101	F5	chr1:169555768/-	46667	1.44	4.56	1.56	-0.27	0.5492	0.5222	0	0
chr1:169496482-169509101	SELE	chr1:169702800/-	193699	1.44	4.56	1.56	-0.27	0	0	0	0.8725
chr1:169496482-169509101	BLZF1	chr1:169338710/+	157772	1.44	4.56	1.56	-0.27	595.879	501.828	555.022	499.971
chr1:169496482-169509101	CCDC181	chr1:169429906/-	-66576	1.44	4.56	1.56	-0.27	0	0	0	0
chr1:169496482-169509101	SELP	chr1:169599376/-	90275	1.44	4.56	1.56	-0.27	0	0	0	0
chr12:29834094-29836829	TMTC1	chr12:29921007/-	84178	1.82	0.93	1.53	3.37	9920.15	8016.19	4061.51	4372.35
chr11:116828909-116829585	BUD13	chr11:116643713/-	-185196	0.02	0.55	0.02	-0.15	215.834	170.235	239.789	346.839
chr11:116828909-116829585	SIK3	chr11:116827779/-	-1130	0.02	0.55	0.02	-0.15	709.013	848.564	365.209	369.089
chr11:116828909-116829585	ZPR1	chr11:116658738/-	-170171	0.02	0.55	0.02	-0.15	0	0	0	0
chr11:116828909-116829585	APOC3	chr11:116701285/+	127624	0.02	0.55	0.02	-0.15	6.5904	3.6554	0	0.4363
chr11:116828909-116829585	APOA4	chr11:116694010/-	-134899	0.02	0.55	0.02	-0.15	1.6476	1.0444	0	0
chr11:116828909-116829585	APOA5	chr11:116663135/-	-165774	0.02	0.55	0.02	-0.15	1.6476	1.5666	0	0
chr11:116828909-116829585	APOA1	chr11:116708337/-	-120572	0.02	0.55	0.02	-0.15	3.8444	1.5666	0	0.4363
chr11:116828909-116829585	PAFAH1B2	chr11:117014999/+	-185414	0.02	0.55	0.02	-0.15	785.901	686.684	743.393	723.344
chr1:66763427-66764746	PDE4B	chr1:66797790/+	-33044	0.58	1.41	0.29	0.18	202.105	58.4856	10.5718	92.054
chr1:7708682-7709726	PER3	chr1:7844488/+	-134762	1.03	0.86	0.15	-0.02	28.5582	15.6658	21.6242	69.3677
chr1:7708682-7709726	VAMP3	chr1:7831328/+	-121602	1.03	0.86	0.15	-0.02	2335.74	2614.1	2275.83	1772.15
chr5:75668182-75669201	IQGAP2	chr5:75699079/+	-29878	0.32	0.75	0.65	0.15	54.3705	25.5875	3.3638	10.4706
chr2:197560630-197561773	GTF3C3	chr2:197664491/-	102718	0.92	0.52	0.4	0.39	941.873	848.042	803.46	928.829
chr2:197560630-197561773	CCDC150	chr2:197504355/+	56275	0.92	0.52	0.4	0.39	30.755	28.1984	54.7814	140.481
chr2:197560630-197561773	C2orf66	chr2:197674999/-	113226	0.92	0.52	0.4	0.39	1.6476	3.6554	1.9222	0
chr2:197560630-197561773	HECW2	chr2:197457334/-	-103296	0.92	0.52	0.4	0.39	450.342	352.48	140.317	121.284
chr15:75110781-75111459	CYP1A1	chr15:75017876/-	-92905	0.05	0.14	0.43	0.37	41.1898	193.734	86.0163	28.3579
chr15:75110781-75111459	CYP1A2	chr15:75042070/+	68711	0.05	0.14	0.43	0.37	0	0	0	0
chr15:75110781-75111459	SCAMP5	chr15:75287875/+	-176416	0.05	0.14	0.43	0.37	142.242	61.0966	47.5733	86.3824
chr15:75110781-75111459	SCAMP2	chr15:75165669/-	54210	0.05	0.14	0.43	0.37	1777.2	2284.07	1578.09	1052.3
chr15:75110781-75111459	COX5A	chr15:75230494/-	119035	0.05	0.14	0.43	0.37	1979.31	2141.51	1922.63	1923.97
chr15:75110781-75111459	CSK	chr15:75090573/+	20208	0.05	0.14	0.43	0.37	898.486	823.499	1219.61	1532.63
chr15:75110781-75111459	CPLX3	chr15:75118950/+	-7491	0.05	0.14	0.43	0.37	2.746	0.5222	0	0
chr15:75110781-75111459	ULK3	chr15:75134458/-	22999	0.05	0.14	0.43	0.37	482.744	386.945	460.356	503.898
chr15:75110781-75111459	RPP25	chr15:75249774/-	138315	0.05	0.14	0.43	0.37	9.8855	5.2219	11.0524	15.7059
chr15:75110781-75111459	MPI	chr15:75182351/+	-70892	0.05	0.14	0.43	0.37	663.979	678.329	506.968	415.77
chr15:75110781-75111459	EDC3	chr15:74988385/-	-122396	0.05	0.14	0.43	0.37	889.15	893.995	786.16	828.922
chr15:75110781-75111459	LMAN1L	chr15:75105193/+	5588	0.05	0.14	0.43	0.37	2.746	0.5222	0	0.4363
chr15:75110781-75111459	FAM219B	chr15:75199461/-	88002	0.05	0.14	0.43	0.37	0	0	0	0
chr3:93780605-93782737	STX19	chr3:93747453/-	-33152	2.6	1.95	1.29	2.26	0	0.5222	0.9611	1.3088
chr3:93780605-93782737	ARL13B	chr3:93722502/+	58103	2.6	1.95	1.29	2.26	353.134	452.741	622.778	633.471
chr3:93780605-93782737	NSUN3	chr3:93781854/+	0	2.6	1.95	1.29	2.26	180.137	120.627	122.537	181.905
chr3:93780605-93782737	PROS1	chr3:93692933/-	-87672	2.6	1.95	1.29	2.26	2232.49	937.337	424.315	639.143
chr3:93780605-93782737	DHFRL1	chr3:93781830/-	0	2.6	1.95	1.29	2.26	200.457	182.768	176.357	274.875
chr4:56759435-56760697	EXOC1	chr4:56724479/+	34956	1.14	1.67	0.75	0.34	1191.21	1131.59	843.825	732.942
chr4:56759435-56760697	CEP135	chr4:56814973/+	-54276	1.14	1.67	0.75	0.34	191.67	189.034	462.278	600.314
chr1:12585123-12589220	DHRS3	chr1:12677736/-	88516	4.37	3.77	1	1.05	258.123	80.9399	54.7814	126.084
chr1:12585123-12589220	AADACL3	chr1:12776117/+	-186897	4.37	3.77	1	1.05	0	0.5222	0	0
chr12:27329463-27352007	MED21	chr12:27175454/+	154009	23.88	5.75	3.71	4.44	569.517	560.313	579.048	495.172
chr12:27329463-27352007	C12orf71	chr12:27235454/-	-94009	23.88	5.75	3.71	4.44	0	1.0444	0.4805	0
chr12:27329463-27352007	ARNTL2	chr12:27485786/+	-133779	23.88	5.75	3.71	4.44	152.128	183.812	264.776	239.079
chr12:27329463-27352007	TM7SF3	chr12:27167338/-	-162125	23.88	5.75	3.71	4.44	1609.7	1316.97	1058.15	1120.79
chr12:27329463-27352007	STK38L	chr12:27397077/+	-45070	23.88	5.75	3.71	4.44	2145.16	1555.09	893.321	595.952
chr4:175441500-175442558	HPGD	chr4:175443217/-	659	1.68	0.59	0.06	0.76	232.31	97.1279	27.3907	80.2746
chr2:128784159-128785814	POLR2D	chr2:128615728/-	-168431	0.79	0.98	0.59	0.75	487.138	578.59	962.038	1189.29
chr2:128784159-128785814	AMMECR1L	chr2:128643513/-	-140646	0.79	0.98	0.59	0.75	735.375	652.219	674.676	793.148
chr2:128784159-128785814	SAP130	chr2:128784868/-	0	0.79	0.98	0.59	0.75	759.54	869.974	861.125	869.932
chr2:128784159-128785814	UGGT1	chr2:128848753/+	-62939	0.79	0.98	0.59	0.75	3341.32	3688.25	3383.95	3032.55
chr19:6459152-6461049	GTF2F1	chr19:6393290/-	-65862	1.63	1.44	1.04	0.9	2214.91	2098.69	1969.73	2385.12
chr19:6459152-6461049	ACER1	chr19:6333639/-	-125513	1.63	1.44	1.04	0.9	0	0	0	0
chr19:6459152-6461049	CD70	chr19:6591162/-	130113	1.63	1.44	1.04	0.9	1.6476	4.1775	1.4416	4.799
chr19:6459152-6461049	SLC25A41	chr19:6433789/-	-25363	1.63	1.44	1.04	0.9	2.746	0.5222	0.4805	0.4363
chr19:6459152-6461049	CLPP	chr19:6361462/+	97690	1.63	1.44	1.04	0.9	911.118	497.128	555.983	1238.58
chr19:6459152-6461049	TUBB4A	chr19:6501407/-	40358	1.63	1.44	1.04	0.9	0	0	0	0
chr19:6459152-6461049	KHSRP	chr19:6424821/-	-34331	1.63	1.44	1.04	0.9	3475.87	3728.98	5795.29	7896.58
chr19:6459152-6461049	MLLT1	chr19:6279958/-	-179194	1.63	1.44	1.04	0.9	2555.96	2440.21	2154.25	2402.13
chr19:6459152-6461049	CRB3	chr19:6464259/+	-3210	1.63	1.44	1.04	0.9	1.6476	0	0.4805	0
chr19:6459152-6461049	SLC25A23	chr19:6459780/-	0	1.63	1.44	1.04	0.9	1702.51	1324.28	691.495	635.216
chr19:6459152-6461049	TNFSF9	chr19:6531009/+	-69960	1.63	1.44	1.04	0.9	81.2812	154.047	128.784	55.8432
chr19:6459152-6461049	DENND1C	chr19:6479728/-	18679	1.63	1.44	1.04	0.9	0.5492	0	0	0
chr19:6459152-6461049	ALKBH7	chr19:6372443/+	86709	1.63	1.44	1.04	0.9	289.427	235.509	147.045	114.304
chr1:219214333-219215289	LYPLAL1	chr1:219347172/+	-131883	-0.02	0.05	0.36	0.9	190.571	186.945	146.564	149.206
chr8:133786658-133788471	TG	chr8:133879204/+	-90733	2.07	1.24	0.65	1.52	14.8283	1.0444	0	0.8725
chr8:133786658-133788471	LRRC6	chr8:133687862/-	-98796	2.07	1.24	0.65	1.52	6.0412	2.0888	1.4416	2.1814
chr8:133786658-133788471	PHF20L1	chr8:133787603/+	0	2.07	1.24	0.65	1.52	1845.3	1773.37	1496.88	1431.42
chr8:133786658-133788471	TMEM71	chr8:133772913/-	-13745	2.07	1.24	0.65	1.52	1.0984	0	0.4805	0.4363
chr9:140304810-140319856	EHMT1	chr9:140513443/+	-193587	10.4	5.24	4.75	10.01	1478.99	1466.84	1462.76	1493.37
chr9:140304810-140319856	NRARP	chr9:140196702/-	-108108	10.4	5.24	4.75	10.01	67.5512	99.7389	143.2	148.333
chr9:140304810-140319856	DPH7	chr9:140473386/-	153530	10.4	5.24	4.75	10.01	0	0	0	0
chr9:140304810-140319856	NELFB	chr9:140149758/+	155052	10.4	5.24	4.75	10.01	0	0	0	0
chr9:140304810-140319856	FAM166A	chr9:140142243/-	-162567	10.4	5.24	4.75	10.01	0.5931	1.1123	3.5944	2.8227
chr9:140304810-140319856	SLC34A3	chr9:140126115/+	178695	10.4	5.24	4.75	10.01	7.1396	8.3551	8.1691	0.4363
chr9:140304810-140319856	C9orf173	chr9:140145712/+	159098	10.4	5.24	4.75	10.01	2.1968	1.0444	1.9222	2.6176
chr9:140304810-140319856	ENTPD8	chr9:140332756/-	12900	10.4	5.24	4.75	10.01	2.1968	0.5222	0.9611	0.8725
chr9:140304810-140319856	NSMF	chr9:140353785/-	33929	10.4	5.24	4.75	10.01	0	0	0	0
chr9:140304810-140319856	NOXA1	chr9:140317846/+	0	10.4	5.24	4.75	10.01	46.1326	19.3211	1.9222	1.7451
chr9:140304810-140319856	MRPL41	chr9:140446308/+	-126452	10.4	5.24	4.75	10.01	693.636	730.026	776.069	723.78
chr9:140304810-140319856	EXD3	chr9:140317713/-	0	10.4	5.24	4.75	10.01	136.201	132.115	86.9774	77.2207
chr9:140304810-140319856	ARRDC1	chr9:140500095/+	-180239	10.4	5.24	4.75	10.01	570.067	657.441	529.073	335.495
chr9:140304810-140319856	RNF208	chr9:140115774/-	-189036	10.4	5.24	4.75	10.01	28.0091	47.5196	28.8323	14.8333
chr9:140304810-140319856	TUBB4B	chr9:140135710/+	169100	10.4	5.24	4.75	10.01	0	0	0	0
chr9:140304810-140319856	CYSRT1	chr9:140119086/+	185724	10.4	5.24	4.75	10.01	0	0	0	0
chr9:140304810-140319856	PNPLA7	chr9:140445020/-	125164	10.4	5.24	4.75	10.01	23.0663	13.0548	4.8054	6.1078
chr9:140304810-140319856	TOR4A	chr9:140173104/+	131706	10.4	5.24	4.75	10.01	0	0	0	0
chr9:140304810-140319856	RNF224	chr9:140122603/+	182207	10.4	5.24	4.75	10.01	0	0	0	0
chr9:140304810-140319856	ZMYND19	chr9:140484936/-	165080	10.4	5.24	4.75	10.01	328.969	310.705	543.969	829.359
chr22:29278649-29280420	HSCB	chr22:29138042/+	140607	1.12	0.47	0.88	1.05	148.832	110.705	141.759	125.647
chr22:29278649-29280420	ZNRF3	chr22:29313376/+	-32956	1.12	0.47	0.88	1.05	331.166	343.603	414.224	554.942
chr22:29278649-29280420	CCDC117	chr22:29176935/+	101714	1.12	0.47	0.88	1.05	699.128	831.854	721.288	811.908
chr22:29278649-29280420	C22orf31	chr22:29457906/-	177486	1.12	0.47	0.88	1.05	0	0	0.4805	0
chr22:29278649-29280420	CHEK2	chr22:29137821/-	-140828	1.12	0.47	0.88	1.05	169.702	98.6945	193.657	354.692
chr22:29278649-29280420	KREMEN1	chr22:29469065/+	-188645	1.12	0.47	0.88	1.05	337.756	282.507	120.135	96.853
chr22:29278649-29280420	XBP1	chr22:29196559/-	-82090	1.12	0.47	0.88	1.05	1992.49	1218.8	1148.01	1637.78
chr5:139104258-139107654	PSD2	chr5:139175405/+	-67751	0.8	1.8	0.85	-0.23	0.5492	0.5222	0	0.8725
chr5:139104258-139107654	UBE2D2	chr5:138979956/+	124302	0.8	1.8	0.85	-0.23	1960.63	1539.43	1998.56	2302.66
chr5:139104258-139107654	CXXC5	chr5:139059948/+	44310	0.8	1.8	0.85	-0.23	259.221	197.911	99.4714	106.015
chr2:242295391-242296485	HDLBP	chr2:242255114/-	-40277	1.14	1.07	0.7	0.78	15921.8	20197.9	15765	12414.6
chr2:242295391-242296485	ANO7	chr2:242127923/+	167468	1.14	1.07	0.7	0.78	21.9679	6.2663	12.494	29.6667
chr2:242295391-242296485	FARP2	chr2:242295663/+	0	1.14	1.07	0.7	0.78	368.511	641.775	576.646	393.084
chr2:242295391-242296485	STK25	chr2:242440210/-	143725	1.14	1.07	0.7	0.78	1711.3	1968.67	1735.7	1512.57
chr2:242295391-242296485	2016-09-02	chr2:242263630/+	31761	1.14	1.07	0.7	0.78	7676.13	7044.91	6698.22	6718.2
chr11:69338949-69339918	CCND1	chr11:69455872/+	-115954	0.24	0.47	0.56	0.61	7802.99	6987.95	15091.8	10444
chr11:69338949-69339918	FGF19	chr11:69519105/-	179187	0.24	0.47	0.56	0.61	0	0	0	0
chr11:69338949-69339918	ORAOV1	chr11:69490164/-	150246	0.24	0.47	0.56	0.61	201.555	176.501	265.257	270.054
chr10:123810825-123811779	TACC2	chr10:123781451/+	29374	0.67	0.58	0.45	0.23	614.002	551.436	523.306	627.363
chr10:123810825-123811779	NSMCE4A	chr10:123734742/-	-76083	0.67	0.58	0.45	0.23	330.067	244.386	538.203	758.682
chr10:123810825-123811779	ATE1	chr10:123688315/-	-122510	0.67	0.58	0.45	0.23	293.82	234.987	317.636	370.834
chr1:212587226-212588960	TMEM206	chr1:212588242/-	0	1.11	0.95	0.69	0.84	181.235	193.212	223.45	289.687
chr1:212587226-212588960	NENF	chr1:212606228/+	-17268	1.11	0.95	0.69	0.84	604.666	617.232	463.239	520.04
chr1:212587226-212588960	PPP2R5A	chr1:212475147/+	112079	1.11	0.95	0.69	0.84	833.132	1169.71	1044.69	697.167
chr1:212587226-212588960	ATF3	chr1:212738675/+	-149715	1.11	0.95	0.69	0.84	96.1095	156.136	65.3532	70.6765
chr9:125023303-125028461	MORN5	chr9:124922186/+	101117	3.47	2.18	0.96	2.26	0	0	0	0
chr9:125023303-125028461	PTGS1	chr9:125132808/+	-104347	3.47	2.18	0.96	2.26	1441.64	1428.72	232.581	153.132
chr9:125023303-125028461	MRRF	chr9:125026881/+	0	3.47	2.18	0.96	2.26	566.771	485.118	602.595	847.682
chr9:125023303-125028461	LHX6	chr9:124991090/-	-32213	3.47	2.18	0.96	2.26	34.5994	13.577	2.4027	8.7255
chr9:125023303-125028461	NDUFA8	chr9:124922097/-	-101206	3.47	2.18	0.96	2.26	936.93	848.042	693.417	683.207
chr9:125023303-125028461	TTLL11	chr9:124855884/-	-167419	3.47	2.18	0.96	2.26	214.736	110.705	117.251	236.461
chr9:125023303-125028461	RBM18	chr9:125023786/-	0	3.47	2.18	0.96	2.26	682.652	783.812	776.069	723.78
chr6:155738187-155740430	NOX3	chr6:155777036/-	36606	2.75	3.57	2.04	2.8	0	0	0	0
chr6:155738187-155740430	CLDN20	chr6:155596749/+	141438	2.75	3.57	2.04	2.8	4.9428	6.7885	5.2859	6.5441
chr6:155738187-155740430	TIAM2	chr6:155561663/+	176524	2.75	3.57	2.04	2.8	103.98	61.9008	38.3662	59.1327
chr6:155738187-155740430	TFB1M	chr6:155635616/-	-102571	2.75	3.57	2.04	2.8	233.409	225.065	272.946	287.069
chr16:30609143-30622466	SRCAP	chr16:30710461/+	-87995	3.73	3.06	1.99	4.29	2508.73	3195.82	3640.56	3540.81
chr16:30609143-30622466	ZNF747	chr16:30546290/-	-62853	3.73	3.06	1.99	4.29	143.176	82.4386	64.272	106.887
chr16:30609143-30622466	ZNF688	chr16:30583727/-	-25416	3.73	3.06	1.99	4.29	20.3203	4.1775	9.6108	14.3491
chr16:30609143-30622466	ZNF689	chr16:30621706/-	0	3.73	3.06	1.99	4.29	208.695	120.104	99.9519	337.24
chr16:30609143-30622466	ZNF629	chr16:30795835/-	173369	3.73	3.06	1.99	4.29	872.125	819.843	469.486	672.736
chr16:30609143-30622466	SEPHS2	chr16:30457295/-	-151848	3.73	3.06	1.99	4.29	1630.57	1607.31	1530.03	1334.13
chr16:30609143-30622466	LOC730183	chr16:30709809/-	87343	3.73	3.06	1.99	4.29	0	0	0	0
chr16:30609143-30622466	ZNF785	chr16:30597091/-	-12052	3.73	3.06	1.99	4.29	6.0412	3.1332	3.0466	3.7171
chr16:30609143-30622466	RNF40	chr16:30772932/+	-150466	3.73	3.06	1.99	4.29	2311.57	3038.12	3158.1	2560.93
chr16:30609143-30622466	FBRS	chr16:30675777/+	-53311	3.73	3.06	1.99	4.29	1645.39	1550.39	1359.44	1369.03
chr16:30609143-30622466	TMEM265	chr16:30751511/+	-129045	3.73	3.06	1.99	4.29	0	0	0	0
chr16:30609143-30622466	ITGAL	chr16:30483982/+	125161	3.73	3.06	1.99	4.29	3.2952	0	0	1.3088
chr16:30609143-30622466	C16orf93	chr16:30773564/-	151098	3.73	3.06	1.99	4.29	30.2058	53.2637	56.7035	54.5344
chr16:30609143-30622466	PRR14	chr16:30662240/+	-39774	3.73	3.06	1.99	4.29	672.217	550.914	593.945	801.873
chr16:30609143-30622466	ZNF764	chr16:30569641/-	-39502	3.73	3.06	1.99	4.29	125.766	104.439	96.5882	134.809
chr16:30609143-30622466	DCTPP1	chr16:30441372/-	-167771	3.73	3.06	1.99	4.29	323.241	183.185	465.396	885.372
chr16:30609143-30622466	ZNF771	chr16:30419365/+	189778	3.73	3.06	1.99	4.29	113.92	101.41	113.172	135.511
chr16:30609143-30622466	PHKG2	chr16:30759619/+	-137153	3.73	3.06	1.99	4.29	316.337	285.118	272.465	273.544
chr16:30609143-30622466	ZNF768	chr16:30537909/-	-71234	3.73	3.06	1.99	4.29	613.069	379.18	467.203	719.854
chr22:50219972-50221871	ZBED4	chr22:50247496/+	-25625	1.56	1.31	0.92	1.25	829.837	1038.12	1171.07	1187.98
chr22:50219972-50221871	PIM3	chr22:50354142/+	-132271	1.56	1.31	0.92	1.25	773.269	1110.18	1077.37	903.525
chr22:50219972-50221871	CRELD2	chr22:50312277/+	-90406	1.56	1.31	0.92	1.25	1346.08	815.666	492.071	729.452
chr22:50219972-50221871	ALG12	chr22:50307490/-	85619	1.56	1.31	0.92	1.25	322.928	297.128	270.543	269.182
chr22:50219972-50221871	BRD1	chr22:50221195/-	0	1.56	1.31	0.92	1.25	521.188	626.632	552.619	579.373
chr22:50219972-50221871	C22orf34	chr22:50051189/-	-168783	1.56	1.31	0.92	1.25	40.6406	44.3864	30.2739	48.8628
chr8:125858917-125885557	ZNF572	chr8:125985538/+	-99981	37.3	4.16	5.14	8.39	8.7872	3.1332	4.3248	2.6176
chr8:125858917-125885557	MTSS1	chr8:125740747/-	-118170	37.3	4.16	5.14	8.39	709.596	588.329	337.982	193.937
chr8:125858917-125885557	SQLE	chr8:126010719/+	-125162	37.3	4.16	5.14	8.39	2758.07	2942.04	1774.63	1475.48
chr8:28861216-28878063	INTS9	chr8:28747697/-	-113519	3.4	5.24	1.9	-0.18	314.141	311.749	349.351	410.099
chr8:28861216-28878063	HMBOX1	chr8:28821327/+	39889	3.4	5.24	1.9	-0.18	354.781	338.381	182.605	190.652
chr8:62601673-62603561	ASPH	chr8:62602407/-	0	1.66	0.27	-0.09	0.24	12474.3	11879.8	10957.1	9031.43
chr7:154793417-154795892	HTR5A	chr7:154862033/+	-66141	2.5	1.68	2.16	2.82	0	0	0	0
chr7:154793417-154795892	PAXIP1	chr7:154794681/-	0	2.5	1.68	2.16	2.82	320.116	253.05	403.46	676.392
chr1:17004299-17005322	NBPF1	chr1:16940099/-	-64200	0.68	1.4	0.93	0.73	765.334	1160.83	1516.72	931.443
chrX:114292196-114294117	IL13RA2	chrX:114252206/-	-39990	2.8	1.27	0.19	0.8	0.5492	0	0.4805	0.8725
chrX:114292196-114294117	RBMXL3	chrX:114423962/+	-129845	2.8	1.27	0.19	0.8	0	0	0	0
chrX:114292196-114294117	LRCH2	chrX:114468634/-	174517	2.8	1.27	0.19	0.8	19.7711	15.1436	13.9356	13.9608
chr4:177179887-177181912	WDR17	chr4:177032725/+	147162	1.87	1.11	0.55	0.05	26.9107	28.1984	29.3128	21.3775
chr4:177179887-177181912	SPATA4	chr4:177116821/-	-63066	1.87	1.11	0.55	0.05	1.6476	0.5222	0	1.7451
chr4:177179887-177181912	SPCS3	chr4:177241089/+	-59177	1.87	1.11	0.55	0.05	4534.72	3345.69	4031.72	4328.72
chr4:177179887-177181912	ASB5	chr4:177190372/-	8460	1.87	1.11	0.55	0.05	1.6476	0	0.4805	0
chr20:5891852-5892822	CHGB	chr20:5891973/+	0	0.41	0.88	0.34	0.66	5.492	7.8329	10.5718	7.4167
chr20:5891852-5892822	LRRN4	chr20:6033449/-	140627	0.41	0.88	0.34	0.66	2.1968	1.0444	0.4805	1.7451
chr20:5891852-5892822	TRMT6	chr20:5924676/-	31854	0.41	0.88	0.34	0.66	635.97	366.057	722.249	1321.91
chr20:5891852-5892822	C20orf196	chr20:5753507/+	138345	0.41	0.88	0.34	0.66	36.7962	13.0548	12.494	24.8677
chr20:5891852-5892822	CRLS1	chr20:5986738/+	-93916	0.41	0.88	0.34	0.66	881.461	643.864	797.693	892.619
chr20:5891852-5892822	MCM8	chr20:5931297/+	-38475	0.41	0.88	0.34	0.66	237.253	155.614	783.277	1378.19
chr10:105155434-105157038	TAF5	chr10:105127723/+	27711	1.68	1.37	1.3	1.52	117.528	196.345	402.691	428.422
chr10:105155434-105157038	CALHM1	chr10:105218647/-	61609	1.68	1.37	1.3	1.52	1.0984	0.5222	0.9611	0
chr10:105155434-105157038	CALHM3	chr10:105238996/-	81958	1.68	1.37	1.3	1.52	21.9679	11.4883	6.247	3.4902
chr10:105155434-105157038	PCGF6	chr10:105110890/-	-44544	1.68	1.37	1.3	1.52	211.99	110.183	196.06	360.363
chr10:105155434-105157038	CALHM2	chr10:105209855/-	52817	1.68	1.37	1.3	1.52	187.825	137.337	106.199	135.681
chr10:105155434-105157038	RPEL1	chr10:105005643/+	149791	1.68	1.37	1.3	1.52	0	0	0	0
chr10:105155434-105157038	NEURL1	chr10:105253734/+	-96696	1.68	1.37	1.3	1.52	0	0	0	0
chr10:105155434-105157038	USMG5	chr10:105155788/-	0	1.68	1.37	1.3	1.52	1257.66	839.687	774.628	960.241
chr10:105155434-105157038	PDCD11	chr10:105156411/+	0	1.68	1.37	1.3	1.52	1890.89	2173.37	3324.84	3633.3
chr10:105155434-105157038	INA	chr10:105036919/+	118515	1.68	1.37	1.3	1.52	0	0	0	0
chr7:102119141-102119495	ORAI2	chr7:102086959/+	32182	0.35	0.26	0.19	0.39	1609.42	1143.19	1497.9	1433.47
chr7:102119141-102119495	PRKRIP1	chr7:102036803/+	82338	0.35	0.26	0.19	0.39	321.621	324.684	265.781	374.158
chr7:102119141-102119495	LOC100289561	chr7:102006420/+	112721	0.35	0.26	0.19	0.39	0	0	0	0
chr7:102119141-102119495	LRWD1	chr7:102105389/+	13752	0.35	0.26	0.19	0.39	353.134	547.259	852.955	662.702
chr7:102119141-102119495	UPK3BL	chr7:102283237/-	163742	0.35	0.26	0.19	0.39	33.6273	18.1984	31.6434	29.3569
chr7:102119141-102119495	SPDYE6	chr7:101996888/-	-122253	0.35	0.26	0.19	0.39	69.435	111.274	72.1816	66.2614
chr7:102119141-102119495	SPDYE2	chr7:102191678/+	-72183	0.35	0.26	0.19	0.39	11.3464	31.953	26.9198	16.753
chr7:102119141-102119495	RASA4B	chr7:102158223/-	38728	0.35	0.26	0.19	0.39	0	0	0	0
chr7:102119141-102119495	SH2B2	chr7:101928352/+	190789	0.35	0.26	0.19	0.39	19.7711	18.799	24.5074	18.3235
chr7:102119141-102119495	SPDYE2B	chr7:102191678/+	-72183	0.35	0.26	0.19	0.39	0	0	0	0
chr7:102119141-102119495	RASA4	chr7:102257204/-	137709	0.35	0.26	0.19	0.39	436.7	223.018	24.7093	30.3909
chr7:102119141-102119495	ALKBH4	chr7:102105320/-	-13821	0.35	0.26	0.19	0.39	241.372	128.872	129.202	265.822
chr7:102119141-102119495	POLR2J3	chr7:102213067/-	93572	0.35	0.26	0.19	0.39	290.63	309.911	267.28	205.272
chr7:102119141-102119495	POLR2J2	chr7:102312175/-	192680	0.35	0.26	0.19	0.39	95.0715	133.285	54.075	90.9328
chr7:102119141-102119495	POLR2J	chr7:102119380/-	0	0.35	0.26	0.19	0.39	761.429	649.671	788.184	1009.61
chr2:71503075-71504464	MPHOSPH10	chr2:71357443/+	145632	0.33	0.4	0.46	0.9	710.112	627.676	959.635	1267.38
chr2:71503075-71504464	MCEE	chr2:71357393/-	-145682	0.33	0.4	0.46	0.9	110.938	55.8747	60.5478	65.4412
chr2:71503075-71504464	ZNF638	chr2:71558884/+	-54420	0.33	0.4	0.46	0.9	2543.88	2443.34	2190.77	2329.27
chr2:71503075-71504464	PAIP2B	chr2:71454232/-	-48843	0.33	0.4	0.46	0.9	29.6566	101.828	35.0793	19.1961
chr2:71503075-71504464	DYSF	chr2:71680752/+	-176288	0.33	0.4	0.46	0.9	42.8374	25.0653	14.4161	5.2353
chr7:155082485-155103776	EN2	chr7:155250823/+	-147047	8.99	17.13	6.24	5.81	49.4277	44.3864	86.9774	109.941
chr7:155082485-155103776	CNPY1	chr7:155301791/-	198015	8.99	17.13	6.24	5.81	0	0	0	0
chr7:155082485-155103776	INSIG1	chr7:155089968/+	0	8.99	17.13	6.24	5.81	3156.78	5958.75	1150.89	805.8
chr2:24013339-24027640	ATAD2B	chr2:24149983/-	122343	4.17	2.57	0.45	-0.15	520.09	553.525	432.965	388.721
chr2:24013339-24027640	UBXN2A	chr2:24163375/+	-135735	4.17	2.57	0.45	-0.15	415.742	503.394	641.038	531.819
chr11:92787962-92788509	MTNR1B	chr11:92702788/+	85174	0.09	0.2	0.69	0.29	0	0	0	0
chr11:92787962-92788509	SLC36A4	chr11:92914951/-	126442	0.09	0.2	0.69	0.29	427.825	415.666	432.965	438.456
chr2:47912878-47913844	FBXO11	chr2:48066907/-	153063	0.99	0.43	0.39	0.29	1352.67	1602.09	1310.43	1177.94
chr2:47912878-47913844	MSH6	chr2:48010220/+	-96376	0.99	0.43	0.39	0.29	1112.12	1201.04	1900.05	3007.24
chr11:27222852-27256454	CCDC34	chr11:27384794/-	128340	16.77	5.73	-0.18	0.3	219.679	163.969	360.404	641.324
chr11:27222852-27256454	BBOX1	chr11:27076939/+	145913	16.77	5.73	-0.18	0.3	0	0.5222	0	0.4363
chr2:40542384-40544906	SLC8A1	chr2:40657443/-	112537	2.49	2.64	1.21	1.05	271.303	78.8512	138.875	327.206
chr2:236377281-236378283	AGAP1	chr2:236402732/+	-24449	0.53	0.33	0.42	0.74	615.65	793.212	589.62	622.564
chr1:110260856-110262501	GNAT2	chr1:110155704/-	-105152	0.29	0.78	0.68	0.74	7.6888	16.7102	7.6886	3.9265
chr1:110260856-110262501	AMPD2	chr1:110168048/+	92808	0.29	0.78	0.68	0.74	1430.66	930.548	800.096	1215.03
chr1:110260856-110262501	GSTM2	chr1:110210643/+	50213	0.29	0.78	0.68	0.74	8.919	7.6762	0	0.5846
chr1:110260856-110262501	GSTM3	chr1:110283132/-	20631	0.29	0.78	0.68	0.74	0.5492	3.6554	0	0.4363
chr1:110260856-110262501	GSTM4	chr1:110198697/+	62159	0.29	0.78	0.68	0.74	359.263	178.564	48.6641	68.2727
chr1:110260856-110262501	CSF1	chr1:110453232/+	-190731	0.29	0.78	0.68	0.74	1604.75	1098.69	510.332	765.663
chr1:110260856-110262501	GSTM5	chr1:110254863/+	5993	0.29	0.78	0.68	0.74	4.3936	0.5222	0.4901	1.3088
chr1:110260856-110262501	GPR61	chr1:110085043/+	175813	0.29	0.78	0.68	0.74	0	0	0	0
chr1:110260856-110262501	EPS8L3	chr1:110304394/-	41893	0.29	0.78	0.68	0.74	1.0984	0	0	0
chr1:110260856-110262501	GNAI3	chr1:110091185/+	169671	0.29	0.78	0.68	0.74	3139.76	3656.4	4278.23	3325.29
chr1:110260856-110262501	GSTM1	chr1:110230417/+	30439	0.29	0.78	0.68	0.74	81.6107	29.9478	21.0043	54.1723
chr18:57434824-57456081	PMAIP1	chr18:57567191/+	-111110	10.52	5.35	1.23	0.7	6.5904	7.3107	42.7679	39.701
chr18:57434824-57456081	CCBE1	chr18:57364643/-	-70181	10.52	5.35	1.23	0.7	1021.51	250.653	253.244	598.133
chr6:6517840-6518741	F13A1	chr6:6320923/-	-196917	0.25	1.02	0.17	0.12	0	0	0	0
chr6:6517840-6518741	LY86	chr6:6588933/+	-70192	0.25	1.02	0.17	0.12	0	0	0	0
chr9:114790710-114837652	UGCG	chr9:114659045/+	131665	23.19	21.92	21.05	30.83	336.109	401.044	424.315	362.545
chr9:114790710-114837652	SUSD1	chr9:114937576/-	99924	23.19	21.92	21.05	30.83	64.8053	76.7624	42.7679	25.7402
chr6:111977135-111979252	TRAF3IP2	chr6:111927476/-	-49659	3.55	1.09	0.2	0.01	1141.78	1075.2	447.862	567.594
chr6:111977135-111979252	REV3L	chr6:111804917/-	-172218	3.55	1.09	0.2	0.01	2509.83	2751.96	1273.43	1524.34
chr6:111977135-111979252	FYN	chr6:112041264/-	62012	3.55	1.09	0.2	0.01	338.305	593.734	255.166	117.794
chr3:44689571-44691130	ZNF445	chr3:44519161/-	-170410	1.85	1.73	1.14	0.88	605.764	1016.19	913.984	656.594
chr3:44689571-44691130	ZNF502	chr3:44754134/+	-63004	1.85	1.73	1.14	0.88	15.9267	15.6658	14.8967	19.1961
chr3:44689571-44691130	ZNF197	chr3:44670565/+	19006	1.85	1.73	1.14	0.88	470.113	535.77	460.836	417.515
chr3:44689571-44691130	ZNF660	chr3:44635505/+	54066	1.85	1.73	1.14	0.88	0	0	2.4027	0
chr3:44689571-44691130	KIF15	chr3:44803208/+	-112078	1.85	1.73	1.14	0.88	104.897	48.0418	565.113	847.682
chr3:44689571-44691130	ZNF35	chr3:44690232/+	0	1.85	1.73	1.14	0.88	243.294	244.909	301.298	317.172
chr3:44689571-44691130	ZNF852	chr3:44552131/-	-137440	1.85	1.73	1.14	0.88	0	0	0	0
chr3:44689571-44691130	ZKSCAN7	chr3:44606978/+	82593	1.85	1.73	1.14	0.88	0	0	0	0
chr3:44689571-44691130	ZNF501	chr3:44771097/+	-79967	1.85	1.73	1.14	0.88	12.0823	6.7885	1.9222	7.8529
chr3:44689571-44691130	KIAA1143	chr3:44803172/-	112042	1.85	1.73	1.14	0.88	1478.44	1454.83	1406.54	1598.51
chr4:103541382-103542654	NFKB1	chr4:103446668/+	94714	2.04	0.79	0.12	0.62	1576.74	1076.24	1357.52	1793.96
chr4:103541382-103542654	UBE2D3	chr4:103731011/-	188357	2.04	0.79	0.12	0.62	5223.41	5271.54	5853.44	5562.94
chr4:103541382-103542654	MANBA	chr4:103682150/-	139496	2.04	0.79	0.12	0.62	925.946	1084.6	570.879	339.422
chr21:36552552-36553579	RUNX1	chr21:36421594/-	-130958	0.16	0.52	0.41	0.33	522.358	994.031	1721.9	1288.78
chr8:81785403-81794979	PAG1	chr8:81905541/-	110562	3.2	2.25	1.26	0.18	221.876	491.384	1201.35	433.221
chr8:81785403-81794979	ZNF704	chr8:81787015/-	0	3.2	2.25	1.26	0.18	148.832	54.3081	24.988	54.9706
chr5:73023835-73025738	ARHGEF28	chr5:72980665/+	43170	2.22	0.19	-0.18	-0.27	0	0	0	0
chr5:73023835-73025738	ANKRA2	chr5:72861510/-	-162325	2.22	0.19	-0.18	-0.27	262.516	202.089	156.655	141.789
chr5:73023835-73025738	UTP15	chr5:72866410/+	157425	2.22	0.19	-0.18	-0.27	620.593	497.65	1073.04	1639.52
chr10:91151357-91153390	LIPA	chr10:91011795/-	-139562	1.67	0.82	0.5	0.53	2222.05	1753.52	813.551	754.756
chr10:91151357-91153390	IFIT1B	chr10:91137812/+	13545	1.67	0.82	0.5	0.53	0	0	0	0
chr10:91151357-91153390	SLC16A12	chr10:91222380/-	68990	1.67	0.82	0.5	0.53	40.0914	12.5326	1.9222	6.5441
chr10:91151357-91153390	IFIT5	chr10:91174324/+	-20934	1.67	0.82	0.5	0.53	537.115	312.794	300.817	353.819
chr10:91151357-91153390	IFIT3	chr10:91098417/+	52940	1.67	0.82	0.5	0.53	194.416	76.7624	25.4685	51.0442
chr10:91151357-91153390	IFIT2	chr10:91061705/+	89652	1.67	0.82	0.5	0.53	112.585	22.4543	2.4027	11.7794
chr10:91151357-91153390	IFIT1	chr10:91152302/+	0	1.67	0.82	0.5	0.53	192.219	45.953	6.7275	21.8137
chr10:91151357-91153390	CH25H	chr10:90967070/-	-184287	1.67	0.82	0.5	0.53	0	0	0	0
chr10:79587956-79588836	DLG5	chr10:79686347/-	97511	0.13	0.64	-0.09	-0.02	12010.9	16290.3	5340.7	3990.17
chr10:79587956-79588836	KCNMA1	chr10:79397576/-	-190380	0.13	0.64	-0.09	-0.02	1145.63	1012.53	859.683	837.212
chr11:102872705-102873520	MMP3	chr11:102714341/-	-158364	0.77	0.21	0.02	0.11	31.8534	3.6554	3.8443	9.598
chr11:102872705-102873520	DYNC2H1	chr11:102980159/+	-106639	0.77	0.21	0.02	0.11	916.61	762.924	770.303	955.442
chr11:102872705-102873520	DCUN1D5	chr11:102962943/-	89423	0.77	0.21	0.02	0.11	637.069	509.661	780.394	1106.39
chr11:102872705-102873520	MMP12	chr11:102745763/-	-126942	0.77	0.21	0.02	0.11	23.6155	3.1332	0	1.3088
chr11:102872705-102873520	MMP13	chr11:102826462/-	-46243	0.77	0.21	0.02	0.11	3.8444	0.5222	0	1.3088
chr10:5507675-5517299	ASB13	chr10:5708557/-	191258	1.18	3.89	1.42	0.41	530.524	452.741	435.848	502.589
chr10:5507675-5517299	CALML3	chr10:5566851/+	-49552	1.18	3.89	1.42	0.41	0.5492	0	0	0
chr10:5507675-5517299	CALML5	chr10:5541532/-	24233	1.18	3.89	1.42	0.41	0	0	0	0
chr10:5507675-5517299	TUBAL3	chr10:5446792/-	-60883	1.18	3.89	1.42	0.41	2.1968	1.5666	3.8443	2.1814
chr10:5507675-5517299	UCN3	chr10:5415677/+	91998	1.18	3.89	1.42	0.41	0	0	0	0
chr10:5507675-5517299	NET1	chr10:5488513/+	19162	1.18	3.89	1.42	0.41	1037.98	1485.64	1554.06	1684.46
chr10:126733856-126734929	CTBP2	chr10:126727723/-	-6133	0.62	1.21	0.75	0.35	1268.65	1289.3	1539.16	1725.47
chr10:126733856-126734929	ZRANB1	chr10:126630691/+	103165	0.62	1.21	0.75	0.35	1434.5	1330.55	982.22	981.182
chr1:153669128-153681636	INTS3	chr1:153700566/+	-18930	4.76	2.86	0.62	1.27	1750.29	920.104	798.174	1438.4
chr1:153669128-153681636	NPR1	chr1:153651163/+	17965	4.76	2.86	0.62	1.27	312.493	68.9295	14.4161	22.25
chr1:153669128-153681636	S100A6	chr1:153508716/-	-160412	4.76	2.86	0.62	1.27	15708.7	21973.9	16967.3	9556.6
[truncated: 106,416 more rows]
